# Supplementary material for: An automated information extraction system from the knowledge graph based annual financial reports
Source: PeerJ journal article supplement (doi:10.7717/peerj-cs.2004), 2024-05-13
Supplement: MCBAnnualReport2020.pdf [file MCBAnnualReport2020.pdf]

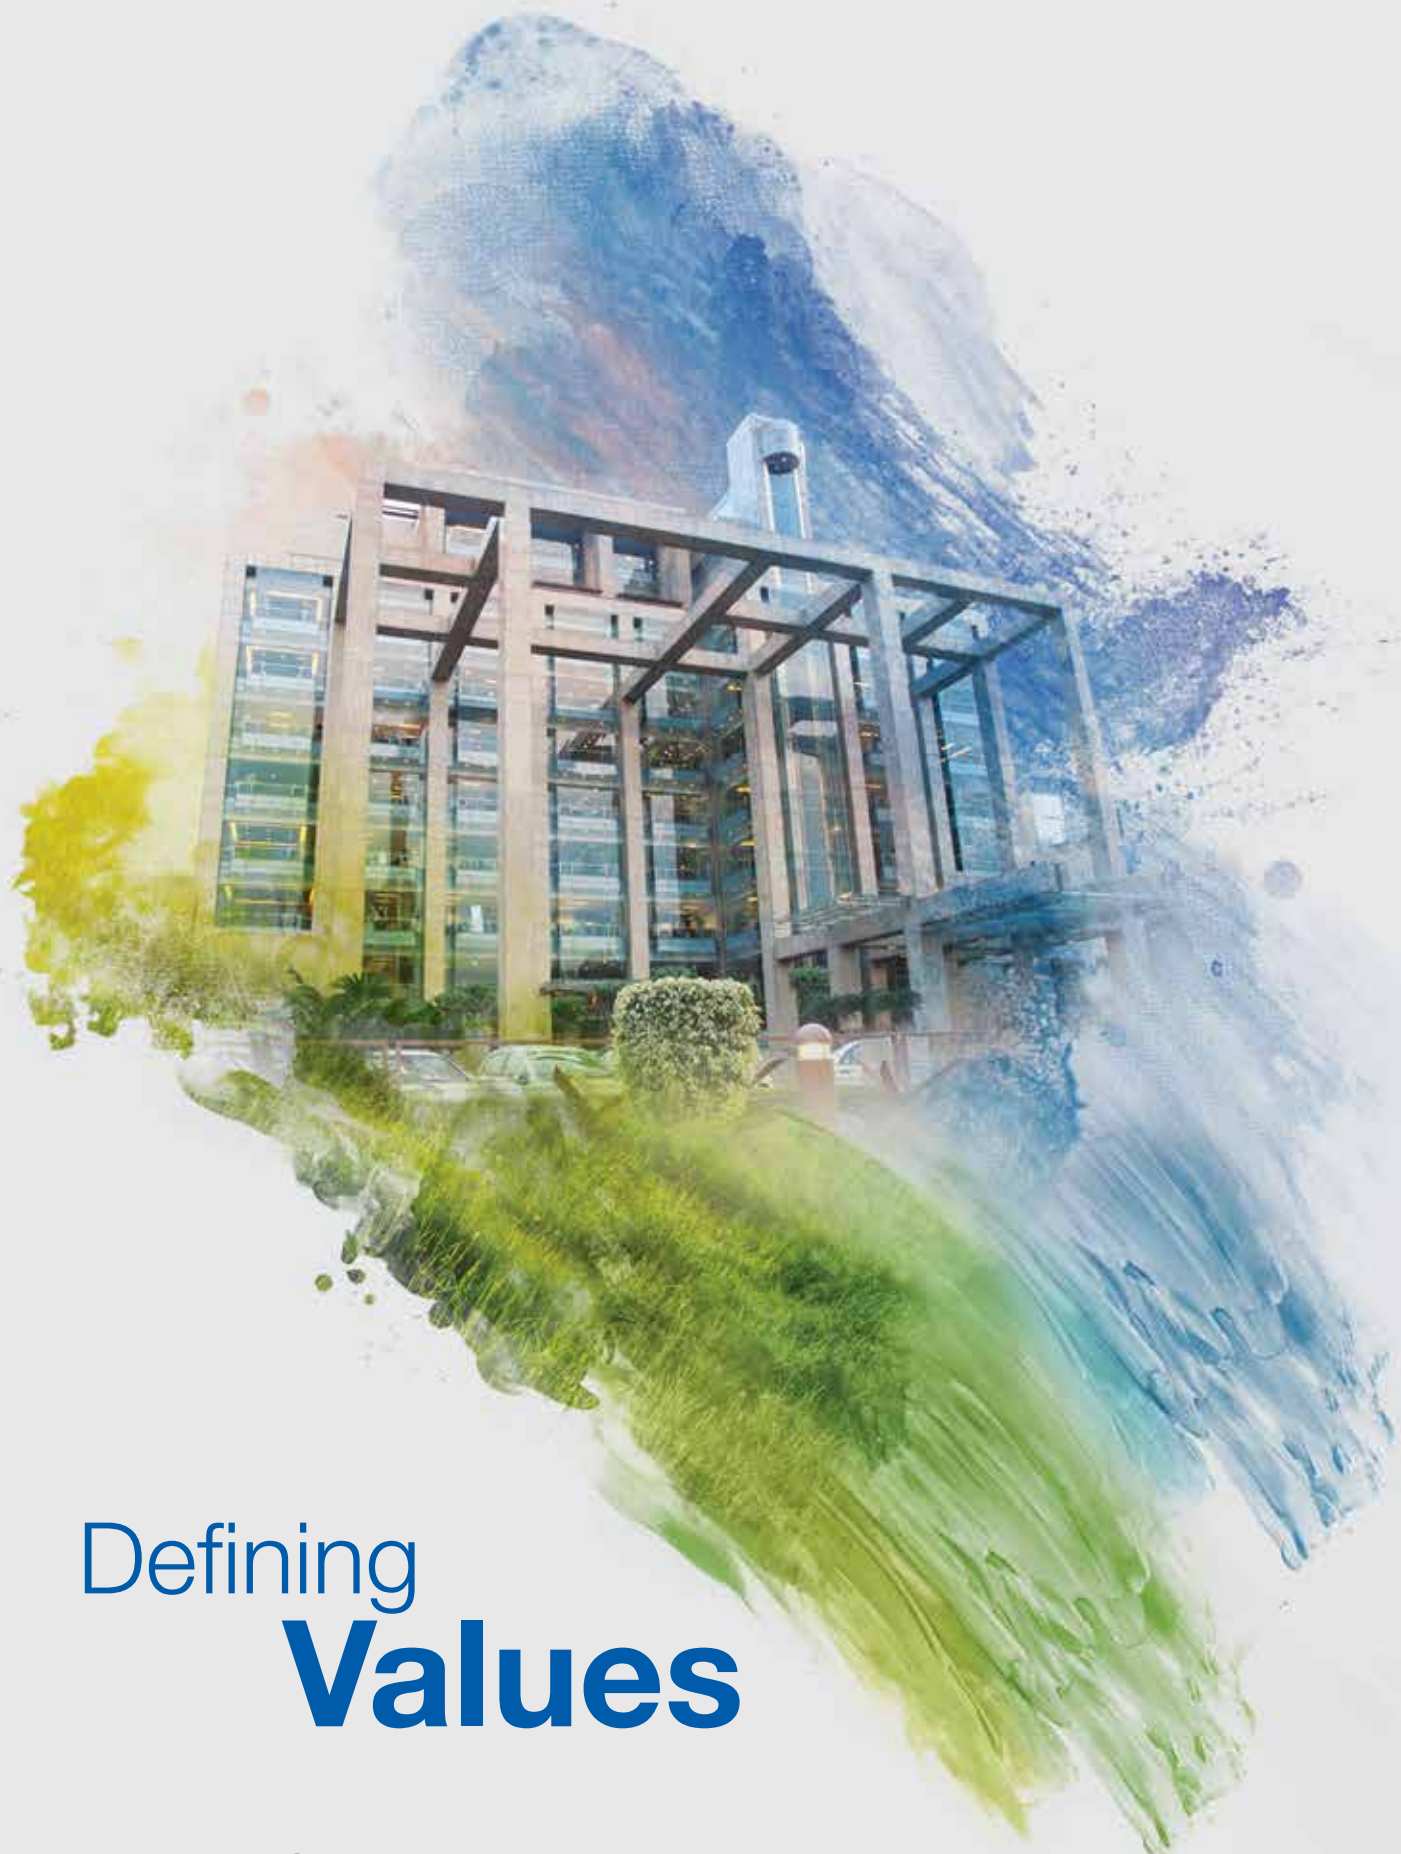

# Defining **Values**

ANNUAL REPORT 2020



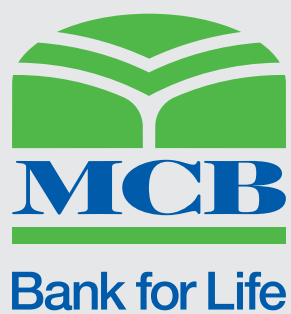

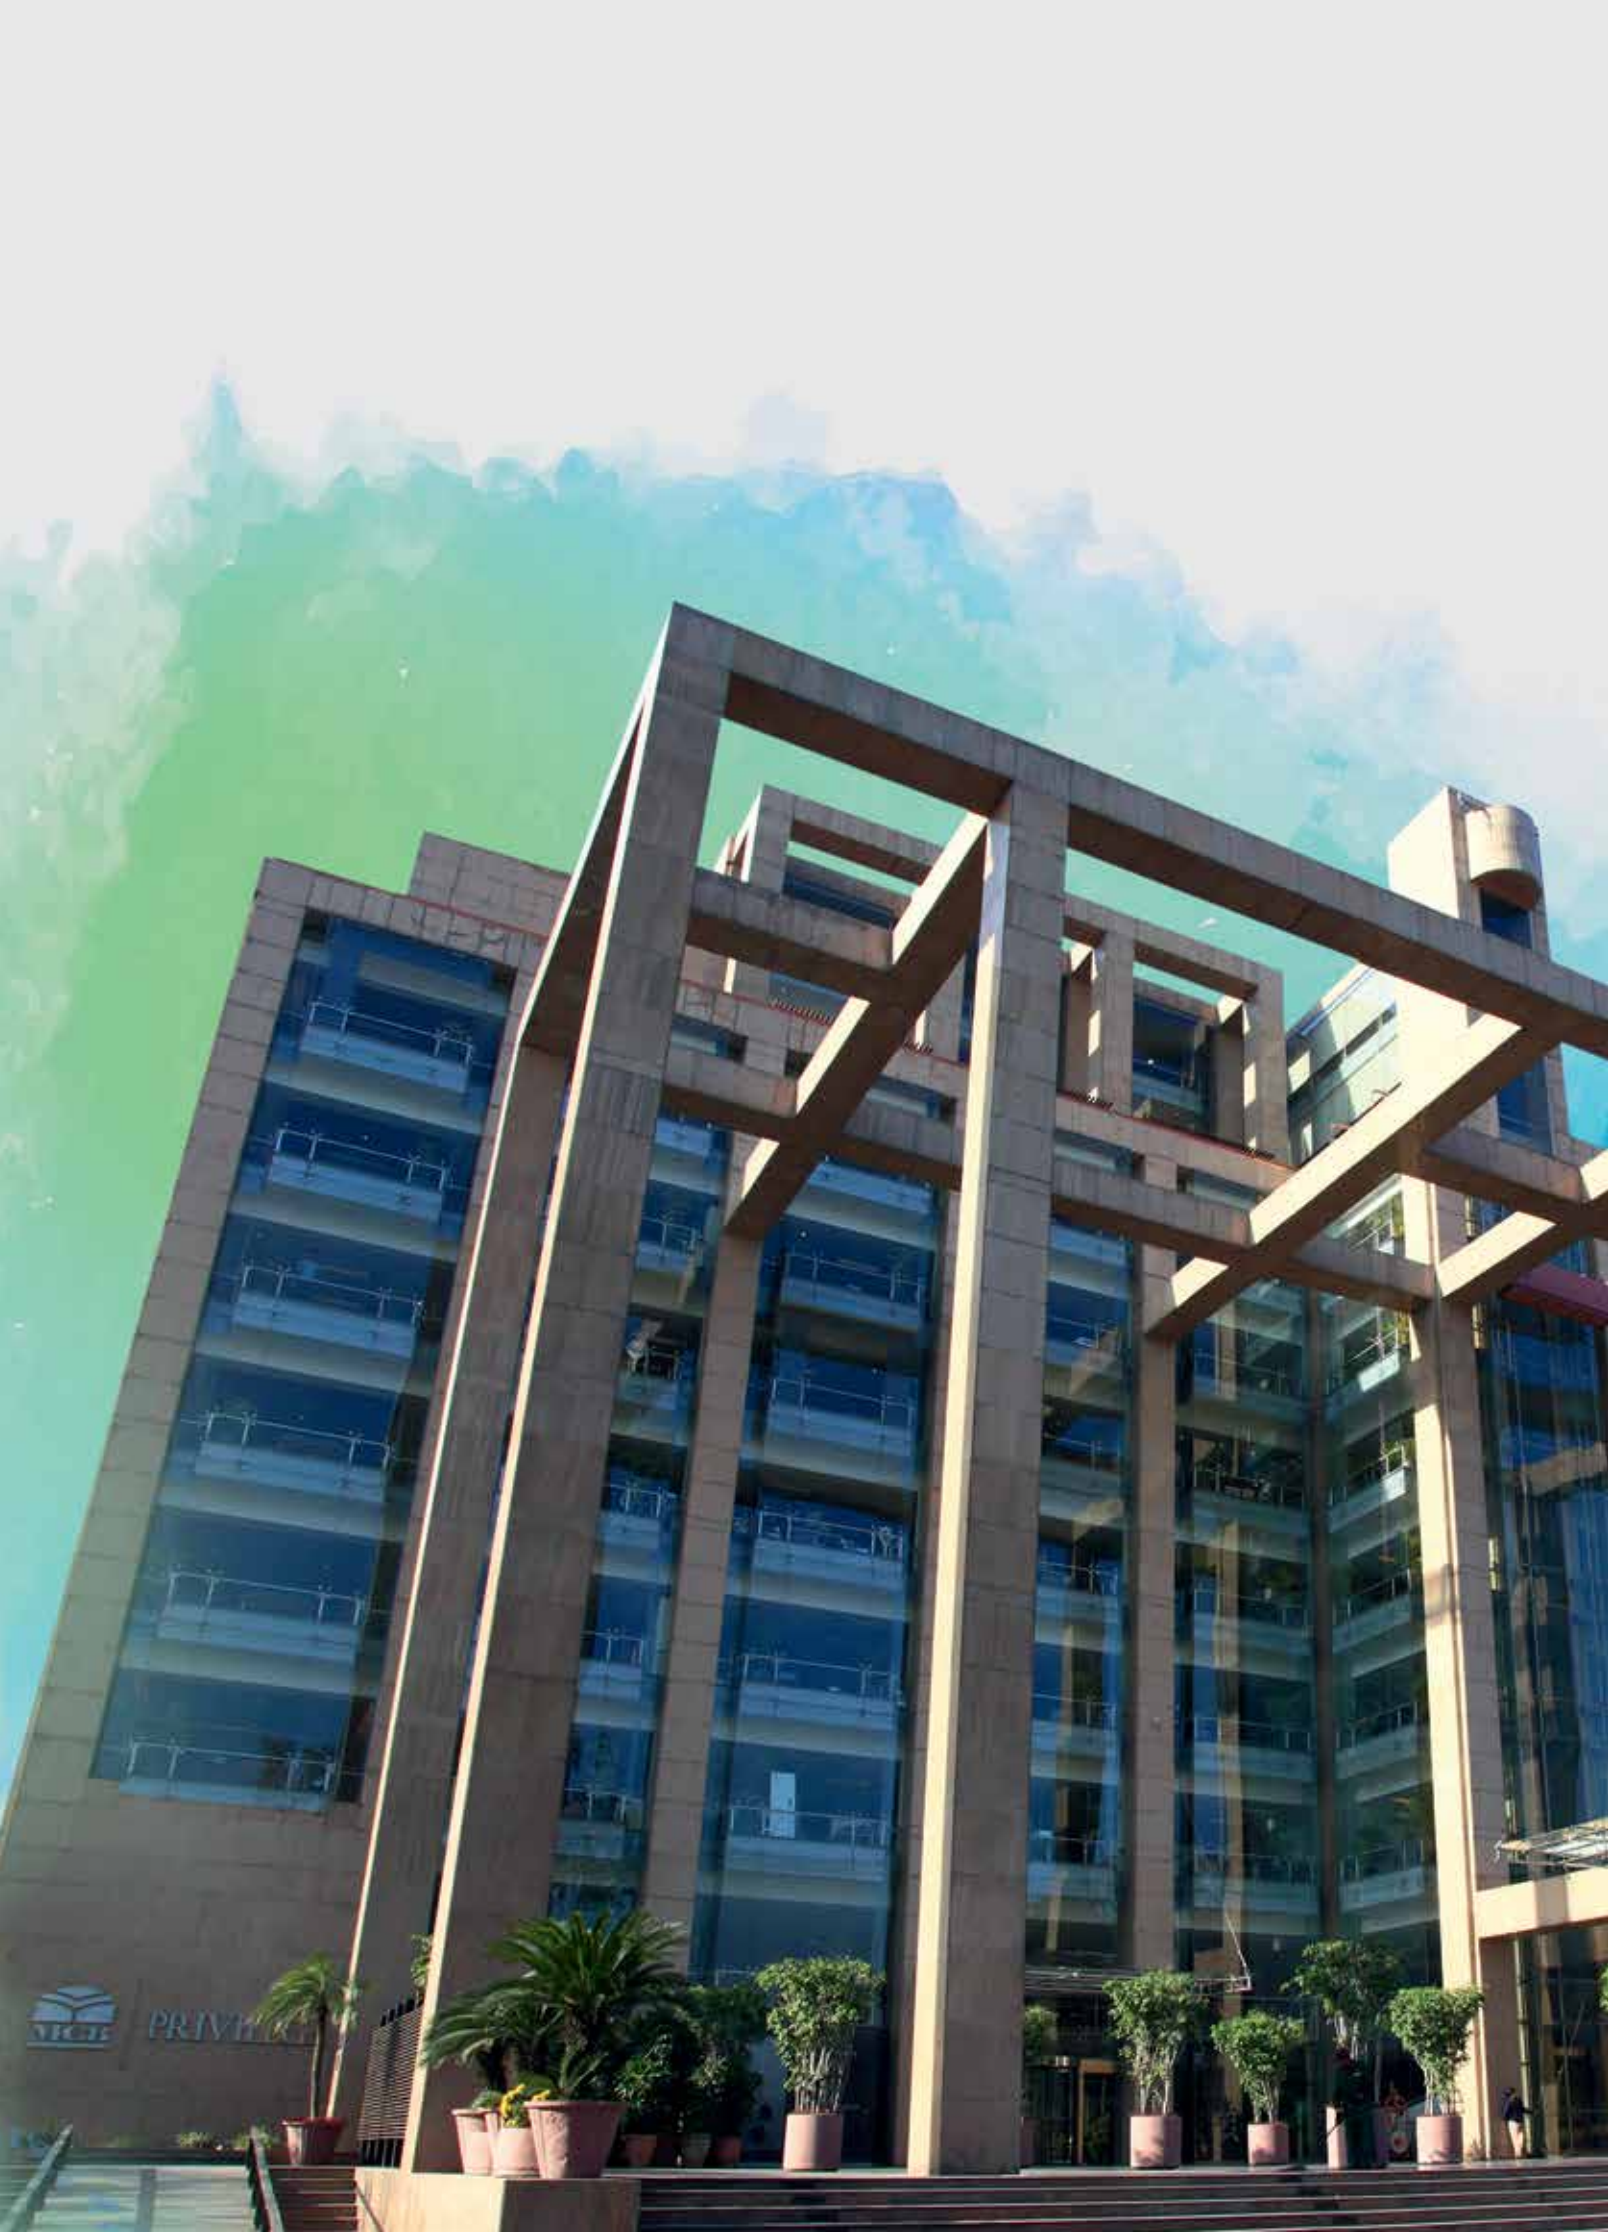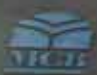

PRIVILEGE

# Defining Values

MCB Bank has been with Pakistan since the very beginning, when the country was first drawn on the world map in 1947. As one of Pakistan's oldest and most trusted banks, our identity is deeply woven into the country's history and heritage. We have come a long way together, and this journey full of challenges and accomplishments has strengthened the values we uphold and cherish.

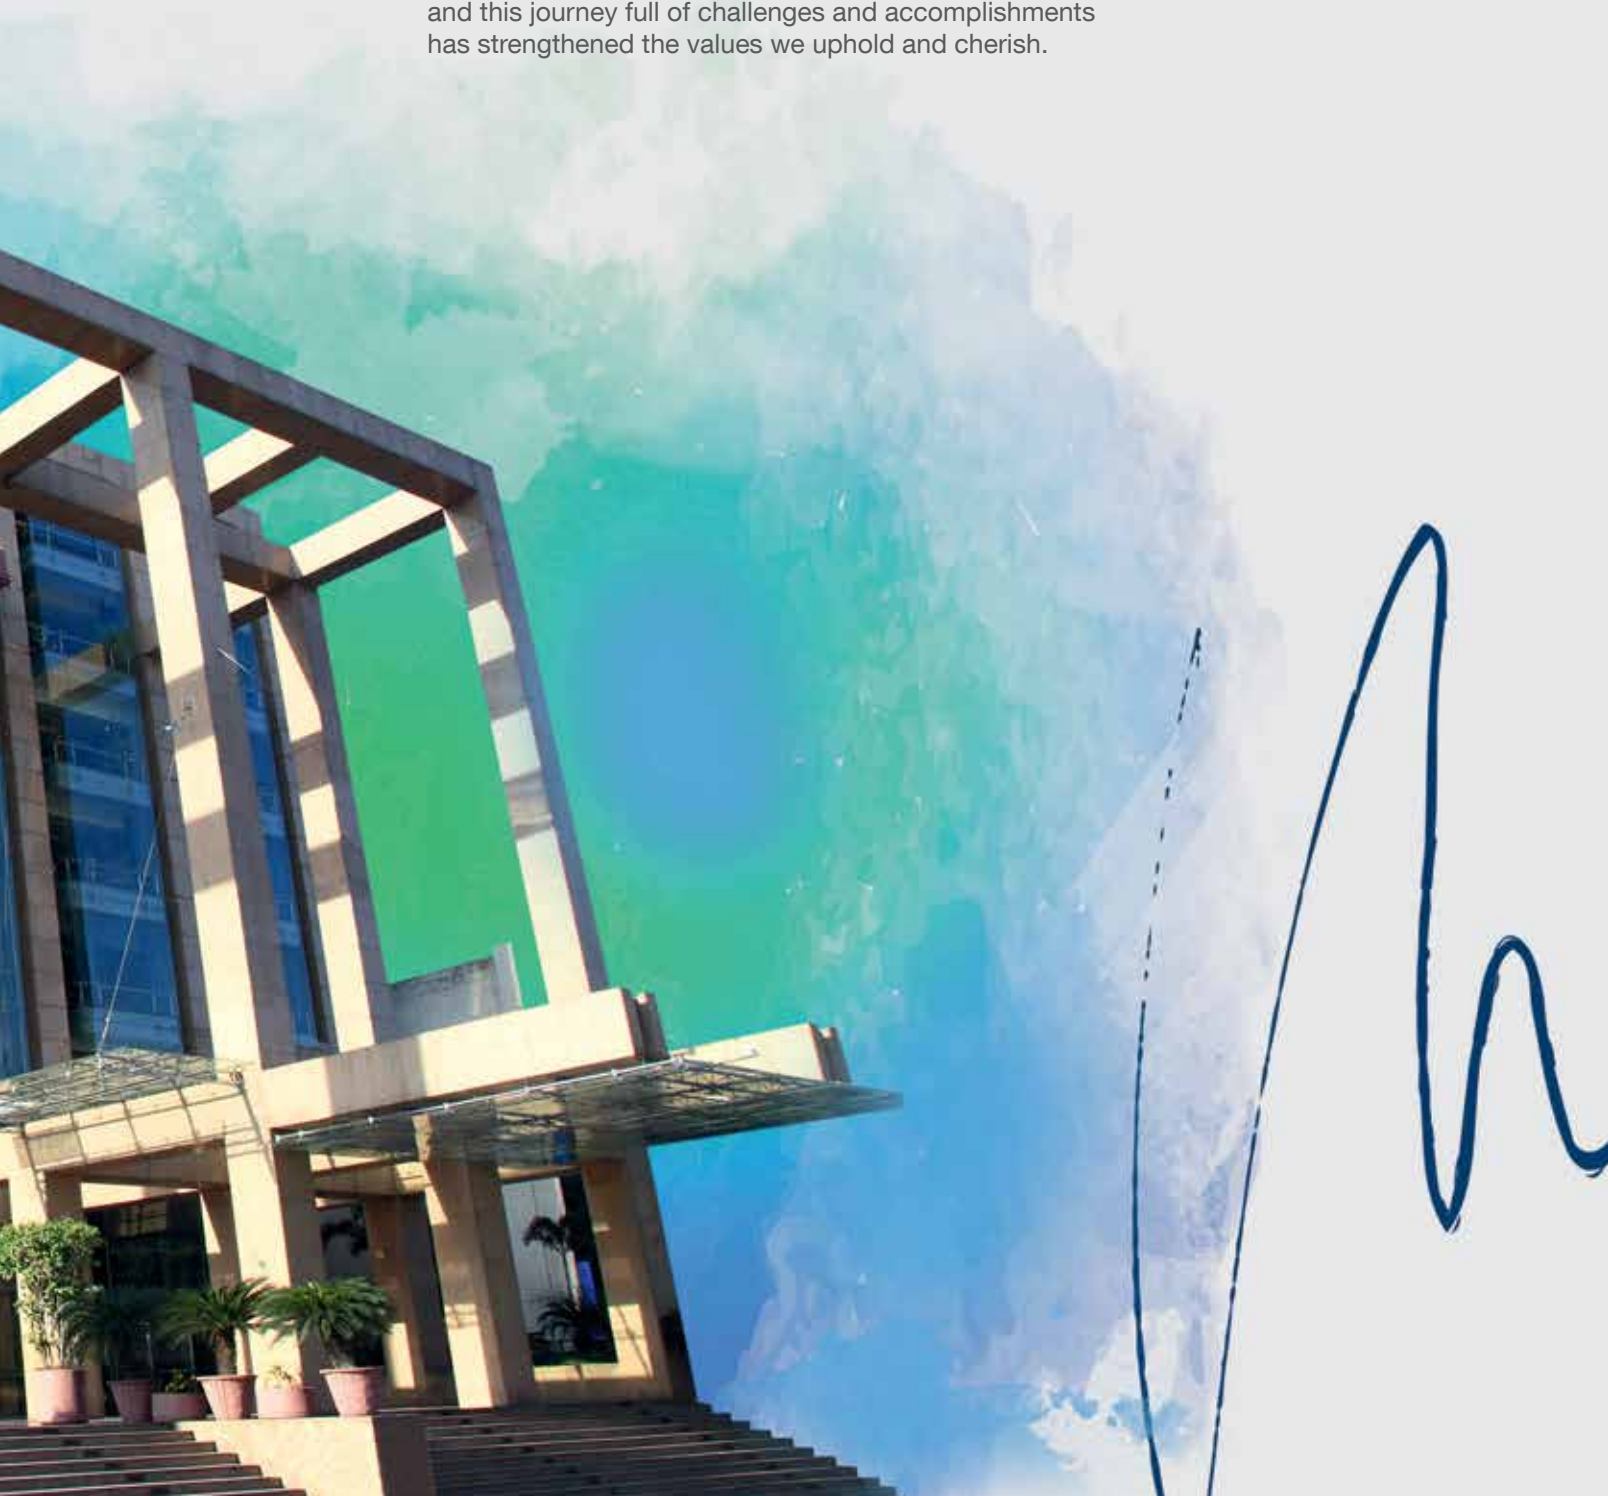



# Table of Contents

- 07. Vision
- 07. Mission
- 09. Strategic Objectives
- 21. Core Values
- 22. Awards

## **Organizational Overview**

- 25. Products and Services
- 38. Corporate Information
- 40. Board of Directors
- 42. Profile of the Board of Directors
- 50. Organizational Structure
- 52. Management Committee
- 54. Other Senior Management
- 56. Entity Credit Rating
- 57. Corporate Profile of the Bank
- 59. Chairman's Review
- 61. President's Review

## **Performance, Position & Outlook**

- 63. Highlights 2020
- 64. Financial Performance 2010 - 2020
- 65. Forward Looking Statement
- 71. Graphical Presentation of Financial Statements
- 72. Analyses of Financial Performance
- 74. Analyses of Non-Financial Performance
- 76. Maturities of Assets and Liabilities
- 76. Key Interest Bearing Assets and Liabilities
- 77. Non-Performing Loans
- 78. Deposits & Advances - Sector Wise
- 79. Deposits & Advances - Group Wise
- 80. Investments
- 81. Capital Structure
- 82. Quarterly Performance - 2020 & 2019
- 83. Quarterly Performance Analysis - 2020 & 2019
- 84. Six Years' - Financial Performance / Financial Ratios 2015 - 2020
- 86. Six Years' - Non-Financial Performance 2015 - 2020
- 87. Six Years' - Performance Commentary
- 90. Six Years' - Graphical Summary of Ratios
- 91. Six Years' - Concentration of Advances, NPLs and Off Balance Sheet Items
- 92. Six Years' - Maturities of Assets & Liabilities
- 93. DuPont Analysis
- 94. Summary of Cash Flows
- 94. Free Cash Flows
- 95. Cash Flow Statement Direct Method
- 96. Markup & Non Markup Income
- 97. Operating Expenses
- 98. Economic Value Added Statement
- 98. Capital Expenditure
- 99. Six Years' - Vertical Analysis

- 100. Six Years' - Horizontal Analysis
- 101. Commentary on Six Years' Horizontal & Vertical Analysis
- 103. Segment Analysis
- 105. Statement of Charity and Donation
- 106. Market Statistics of MCB's Share
- 107. Share Price Sensitivity Analysis
- 108. Other Information
- 110. MCB Calendar of Major Events during 2020

#### **Strategic & Resource Allocation**

- 111. Strategic Objectives
- 112. Strategies in Place
- 112. Methods and Assumptions in Compiling Indicators
- 112. Change in Indicators & Performance Measures
- 114. Resource Allocation Plan
- 115. Business Model
- 116. Value Chain
- 117. Comparative Landscape and Market Positioning

#### **Risk and Opportunities**

- 118. Risk Management Framework
- 121. Risk and Opportunity Report

#### **Directors Report & Groups Review**

- 128. Directors Report
- 136. Groups Review

#### **Corporate Governance & Stakeholders Engagement**

- 147. Board Composition
- 151. Board Committees
- 156. Management Committee
- 168. Pandemic Recovery Plan by the Management and Policy Statement
- 169. IT Governance
- 170. Adoption & Statement of Adherence with the International Integrated Reporting Framework
- 171. Profile of Shari'ah Advisor Board
- 172. Role Shari'ah Advisor Board
- 173. Report of Shari'ah Board - English
- 178. Report of Shari'ah Board - Urdu
- 179. Sustainability & Corporate Social Responsibility
- 189. Certifications Acquired and International Standards Adopted
- 190. Green Banking Initiative
- 193. Stakeholders Engagement Process and Frequency

- 194. Investor Relation Section on Corporate Website
- 195. Steps to Encourage Minority Shareholders Participation in AGM
- 195. Stakeholder Engagement Policy & Summary of Analyst Briefing
- 196. Issues Raised in Last AGM
- 197. Statement of Value Added
- 198. Code of Conduct
- 202. Statement on Internal Controls
- 203. Statement of Compliance with the Code of Corporate Governance
- 205. Review Report to the Members on Statement of Compliance with the Code of Corporate Governance
- 206. Report of the Audit Committee

#### **Unconsolidated Financial Statements**

- 210. Auditors' Report to the Members
- 214. Statement of Financial Position
- 215. Profit and Loss Account
- 216. Statement of Comprehensive Income
- 217. Statement of Changes in Equity
- 218. Cash Flow Statement
- 219. Notes to the Unconsolidated Financial Statements
- 296. Annexure

#### **Consolidated Financial Statements**

- 318. Directors' Report on Consolidated Financial Statements
- 320. Auditors' Report to the Members
- 324. Consolidated Statement of Financial Position
- 325. Consolidated Profit and Loss Account
- 326. Consolidated Statement of Comprehensive Income
- 327. Consolidated Statement of Changes in Equity
- 328. Consolidated Cash Flow Statement
- 329. Notes to the Consolidated Financial Statements
- 410. Annexure

#### **Other Information**

- 422. Branch Network
- 425. Pattern of Shareholding
- 425. Categories of Shareholders
- 429. Notice of 73rd Annual General Meeting
- 436. Glossary of Terms
- 439. Form of Proxy
- Investors' Awareness

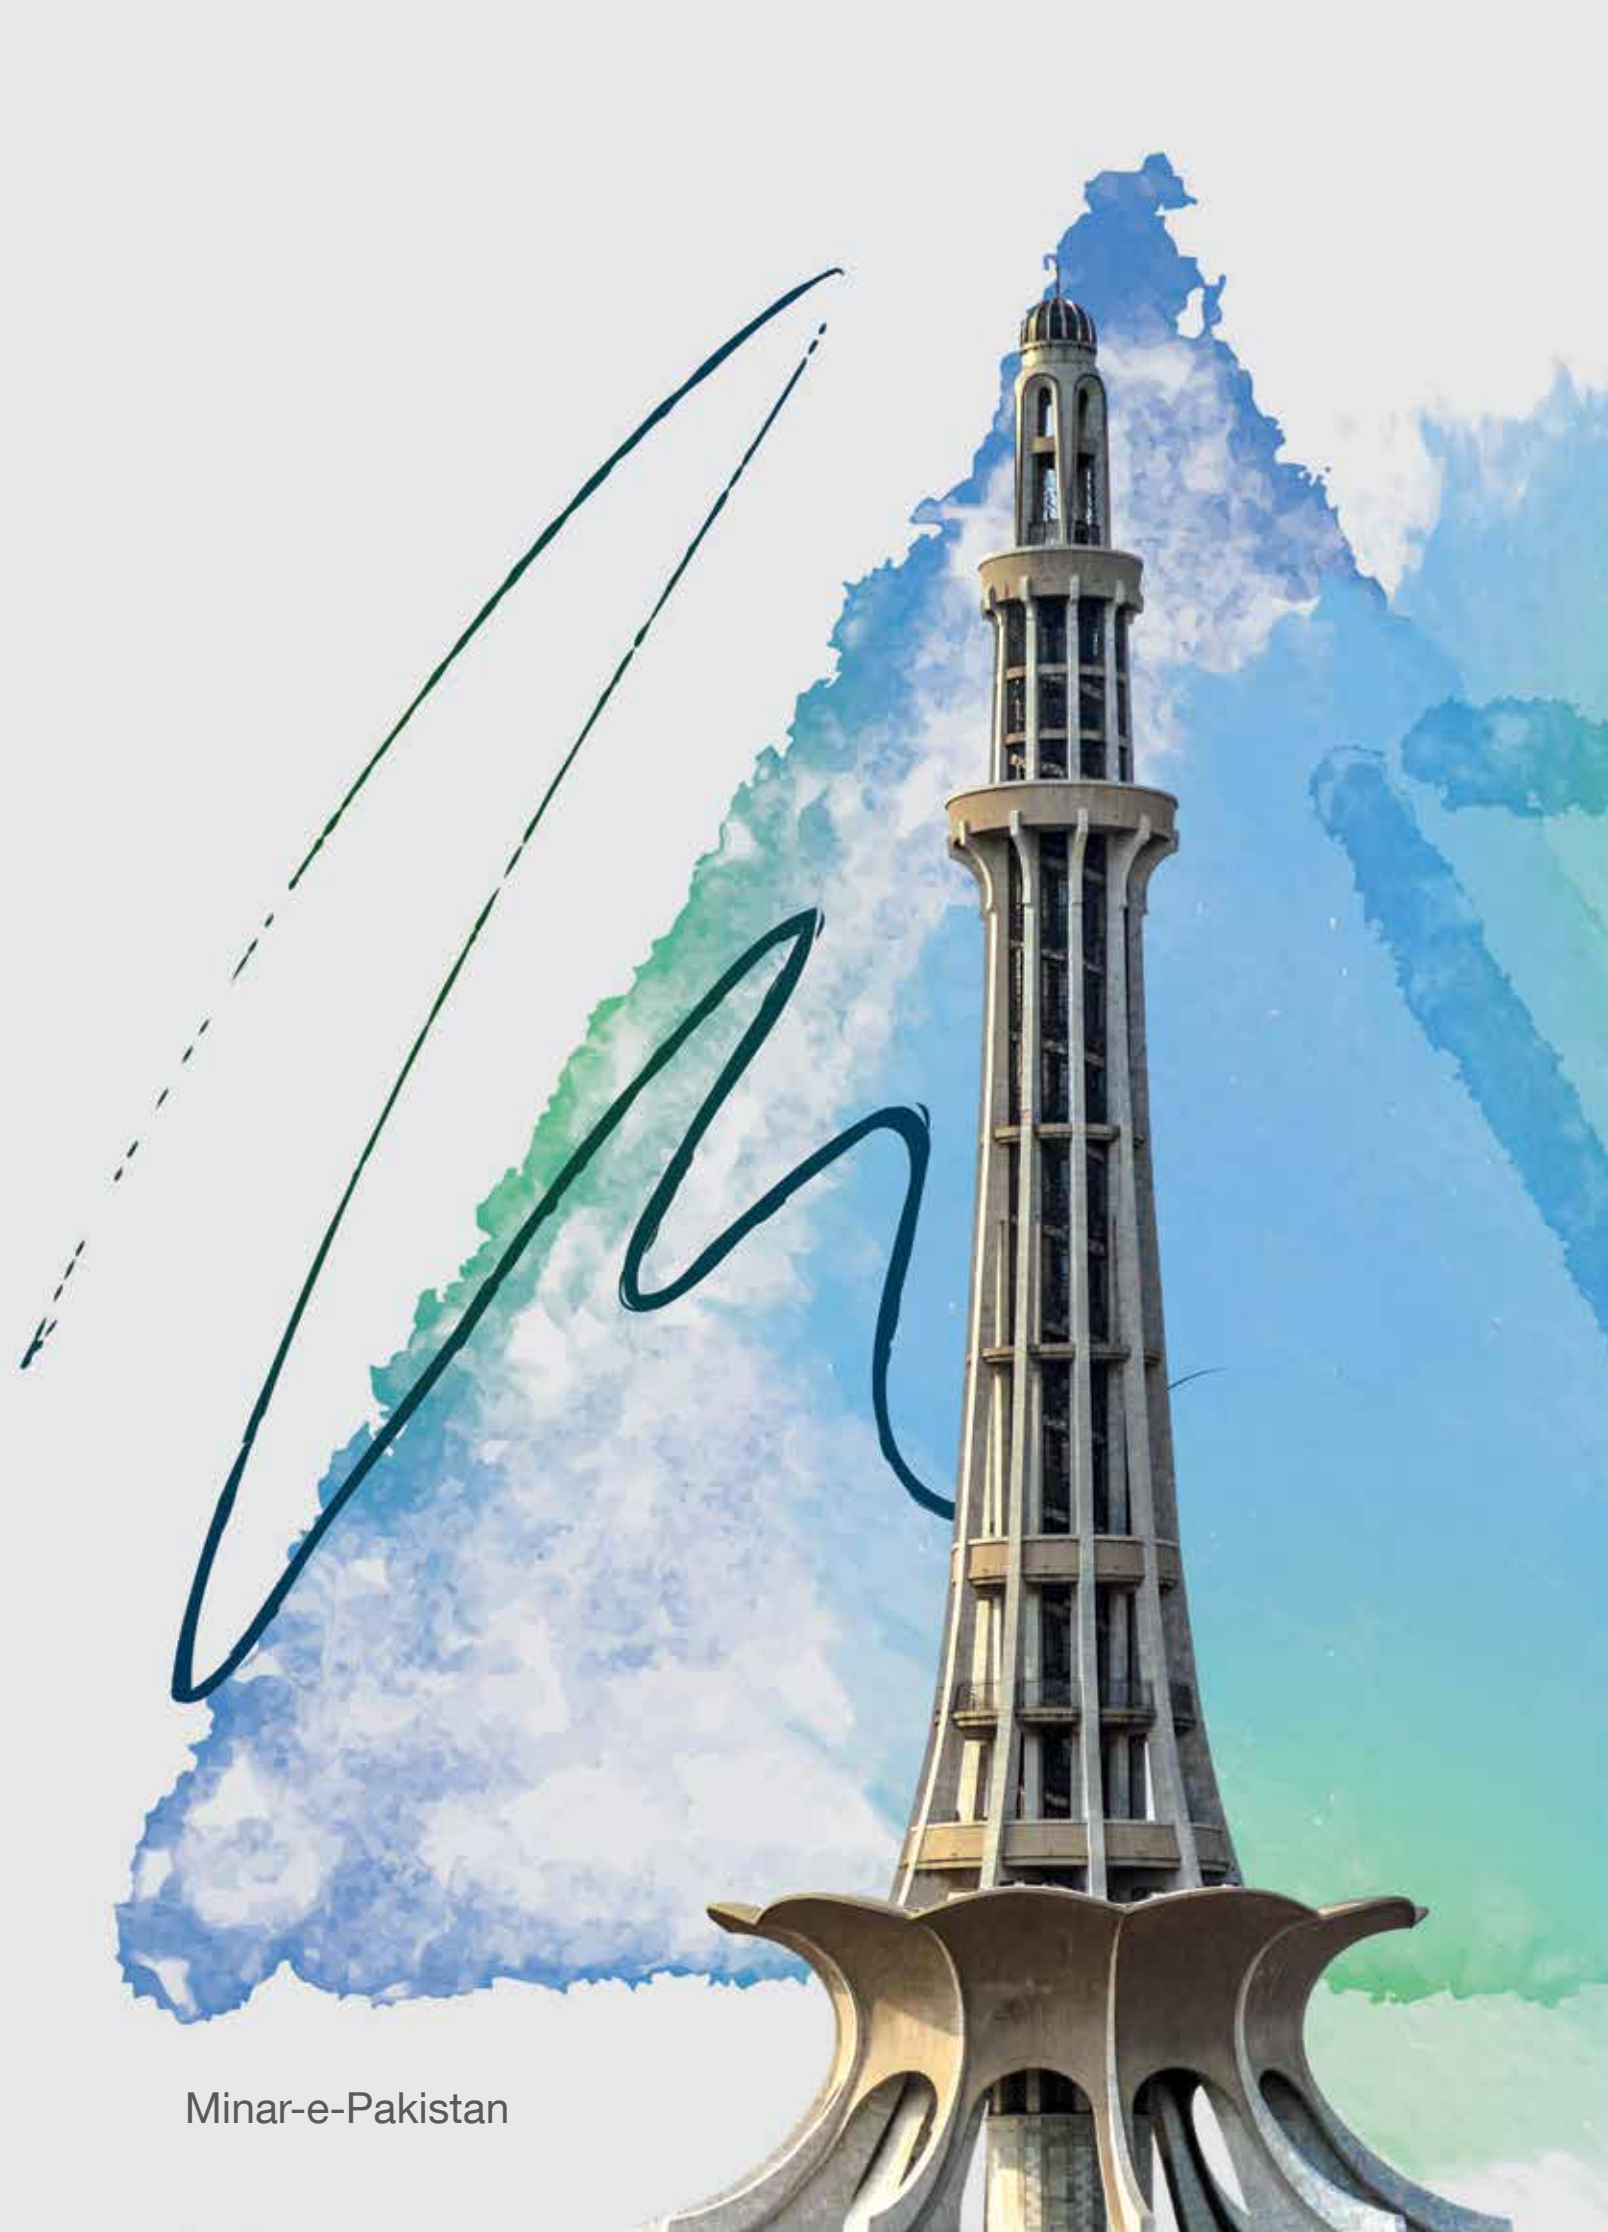

Minar-e-Pakistan





# Vision

To be the leading financial services provider, partnering with our customers for a more prosperous and secure future.

# Mission

We are a team of committed professionals, providing innovative and efficient financial solutions to create and nurture long-term relationships with our customers. In doing so, we ensure that our shareholders can invest with confidence in us.

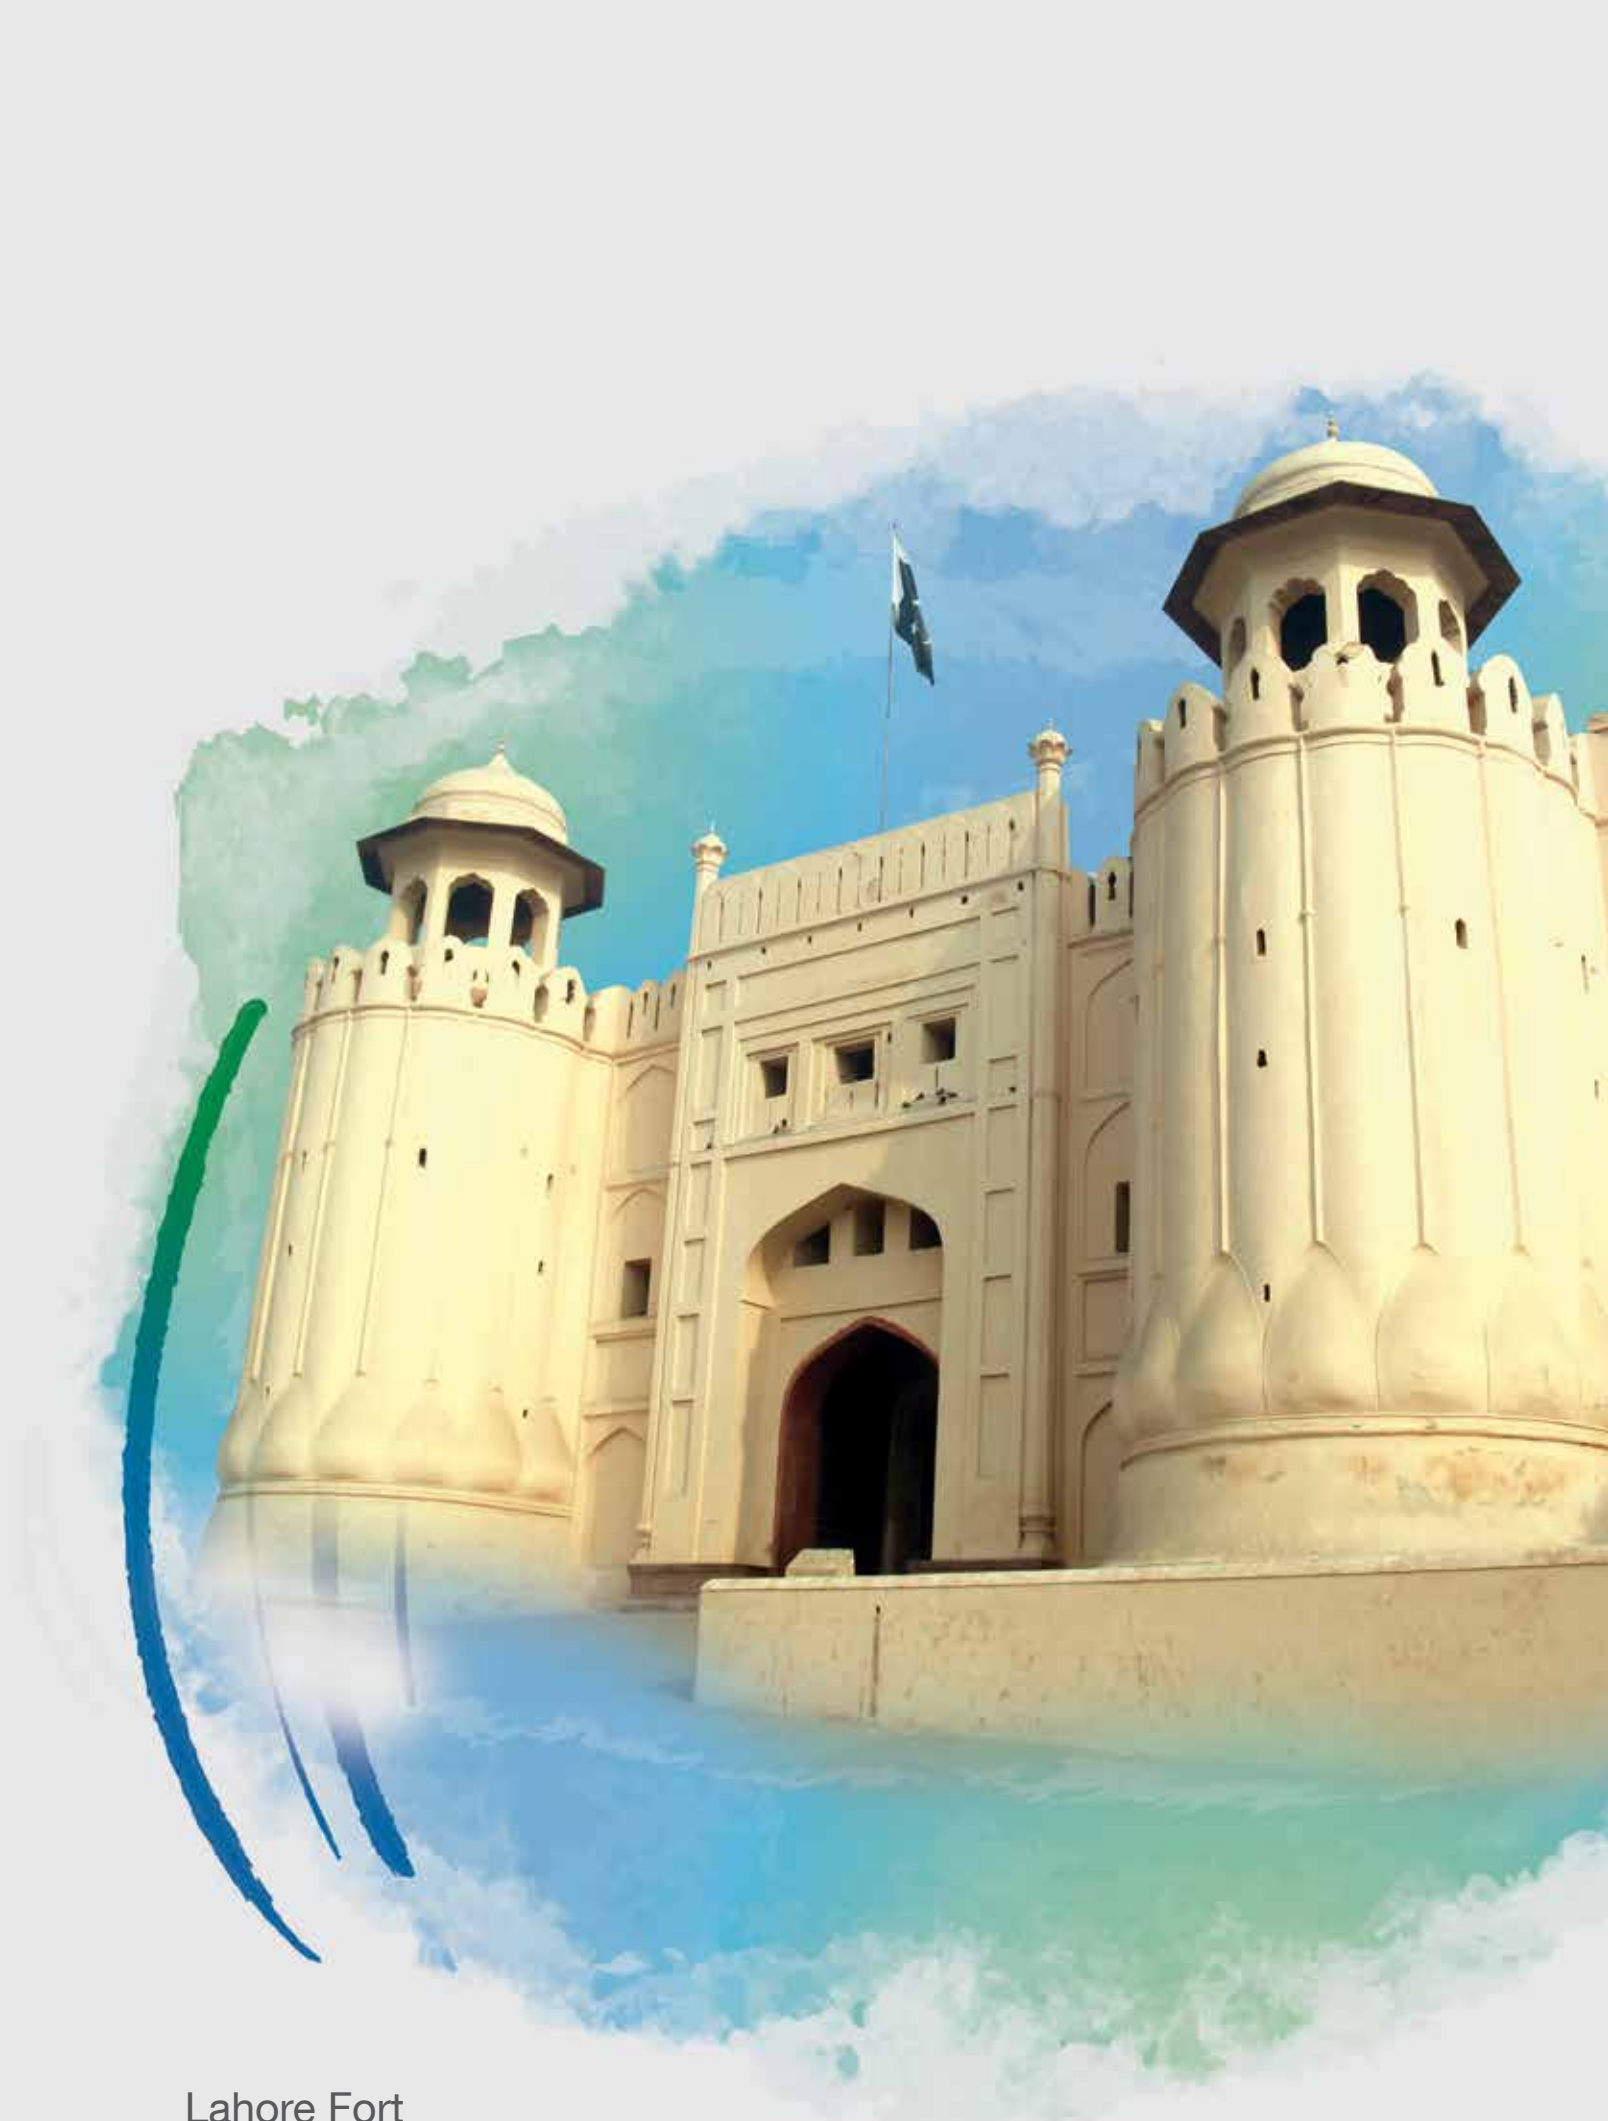

Lahore Fort



# Strategic Objectives

Delivering remarkable returns to stakeholders, sustainable performance, exceeding market and shareholder expectations

Providing value added services through operational expansion, geography and upgraded system

Building a corporate culture of equality, trust and team spirit as we remain dedicated to being a socially responsible organization

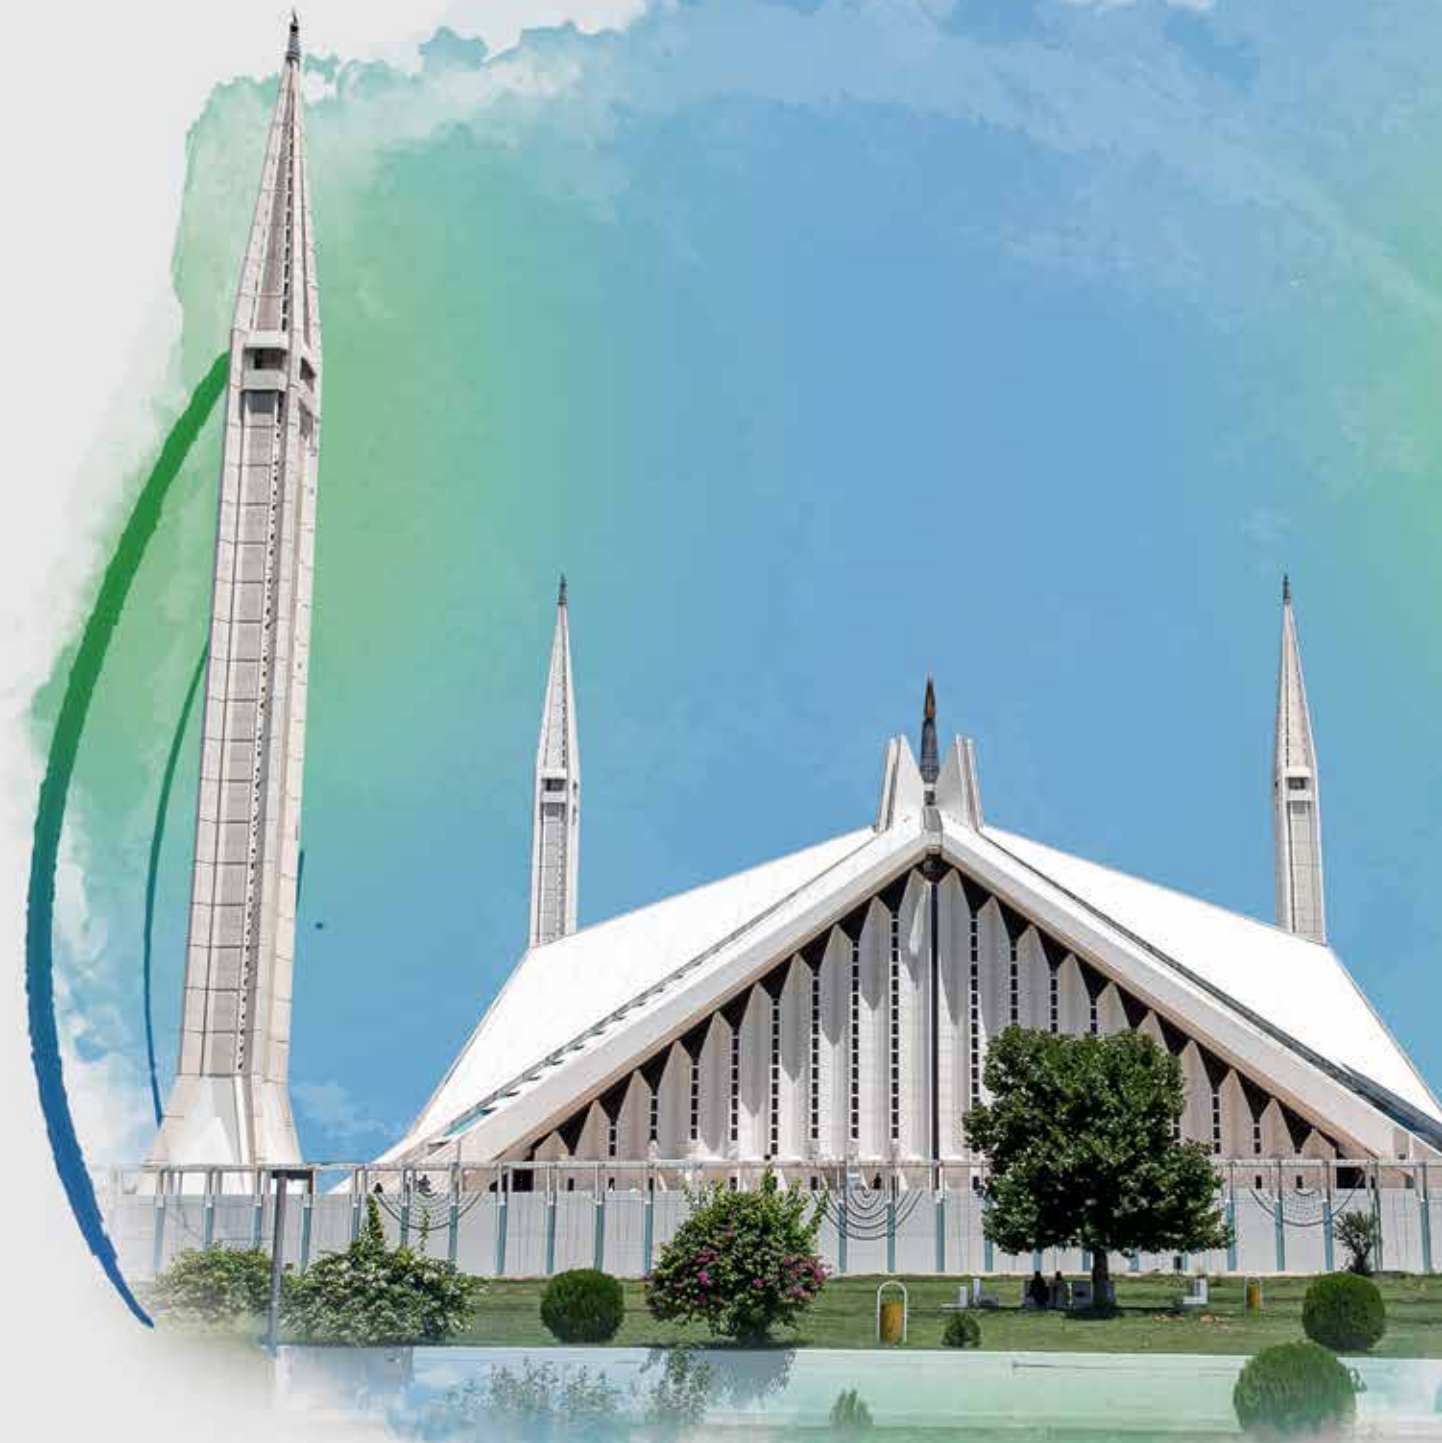

Faisal Mosque

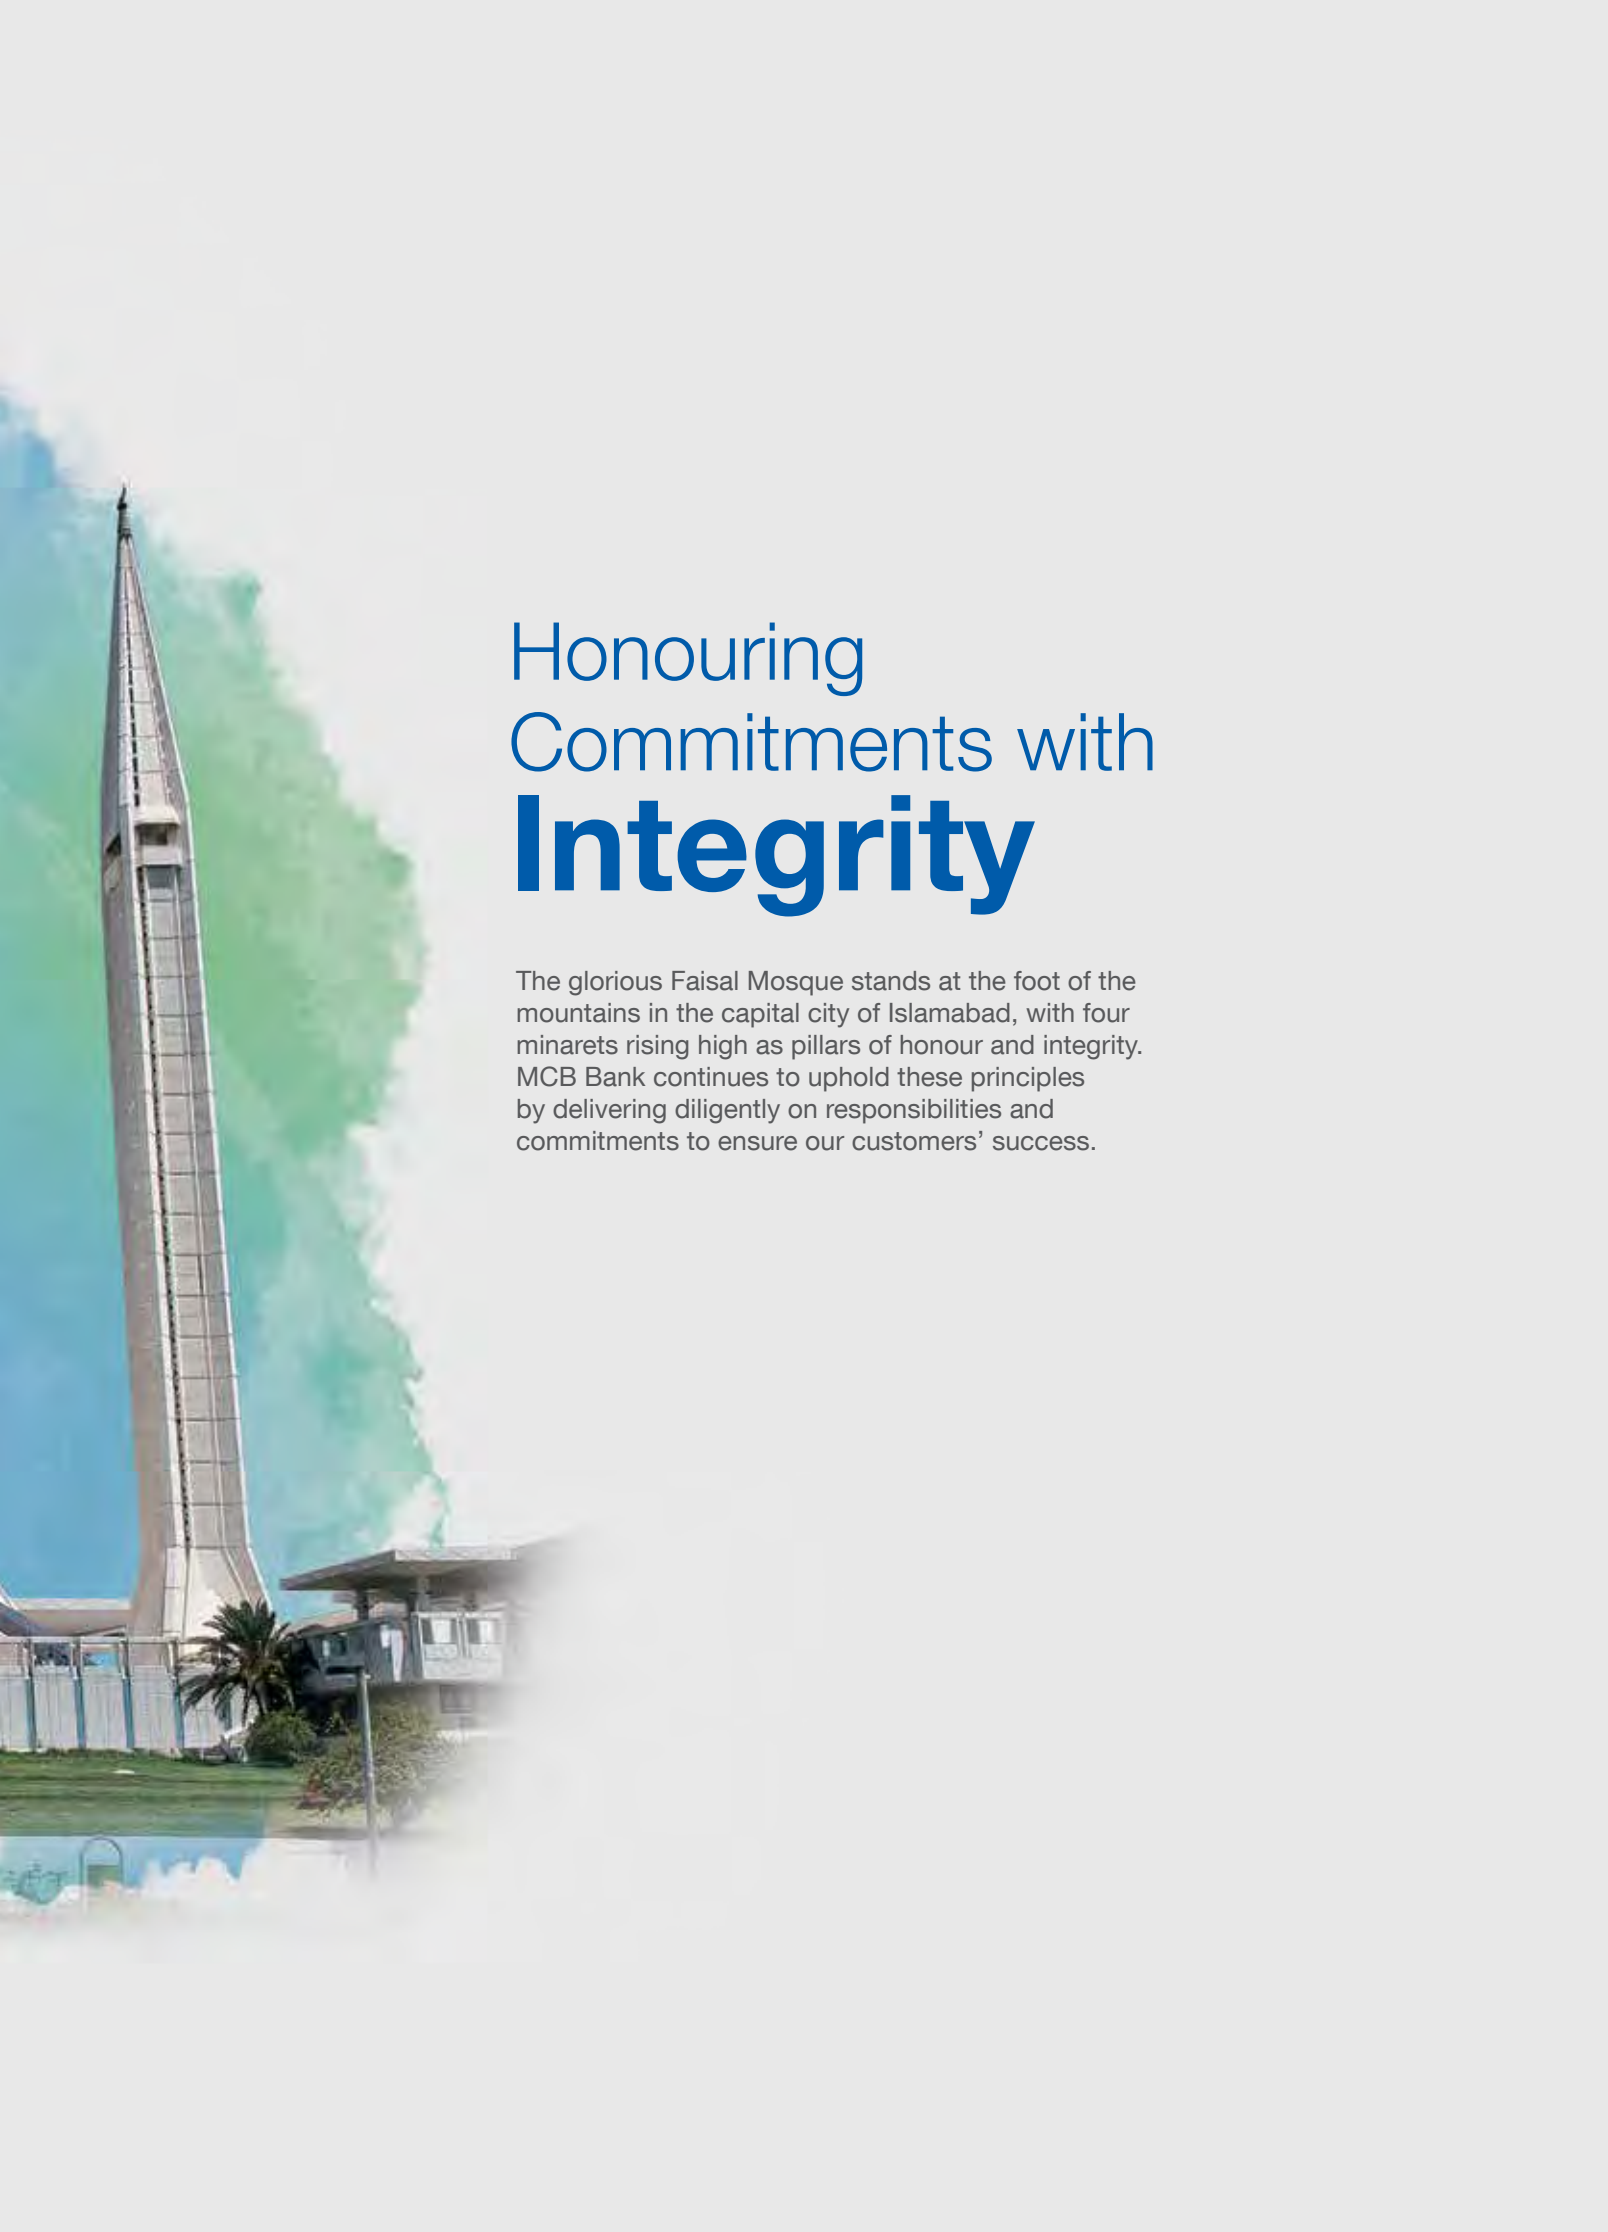

# Honouring Commitments with **Integrity**

The glorious Faisal Mosque stands at the foot of the mountains in the capital city of Islamabad, with four minarets rising high as pillars of honour and integrity. MCB Bank continues to uphold these principles by delivering diligently on responsibilities and commitments to ensure our customers' success.

# Leading with **Innovation**

Built at the height of the Mughal Empire, the Sheesh Mahal is an architectural marvel that consists of gold, precious stones, marble, glass and mirrors all brought together intricately in perfect harmony. We at MCB Bank strive to lead the market with innovative solutions that offer our customers the best banking services.

Sheesh Mahal



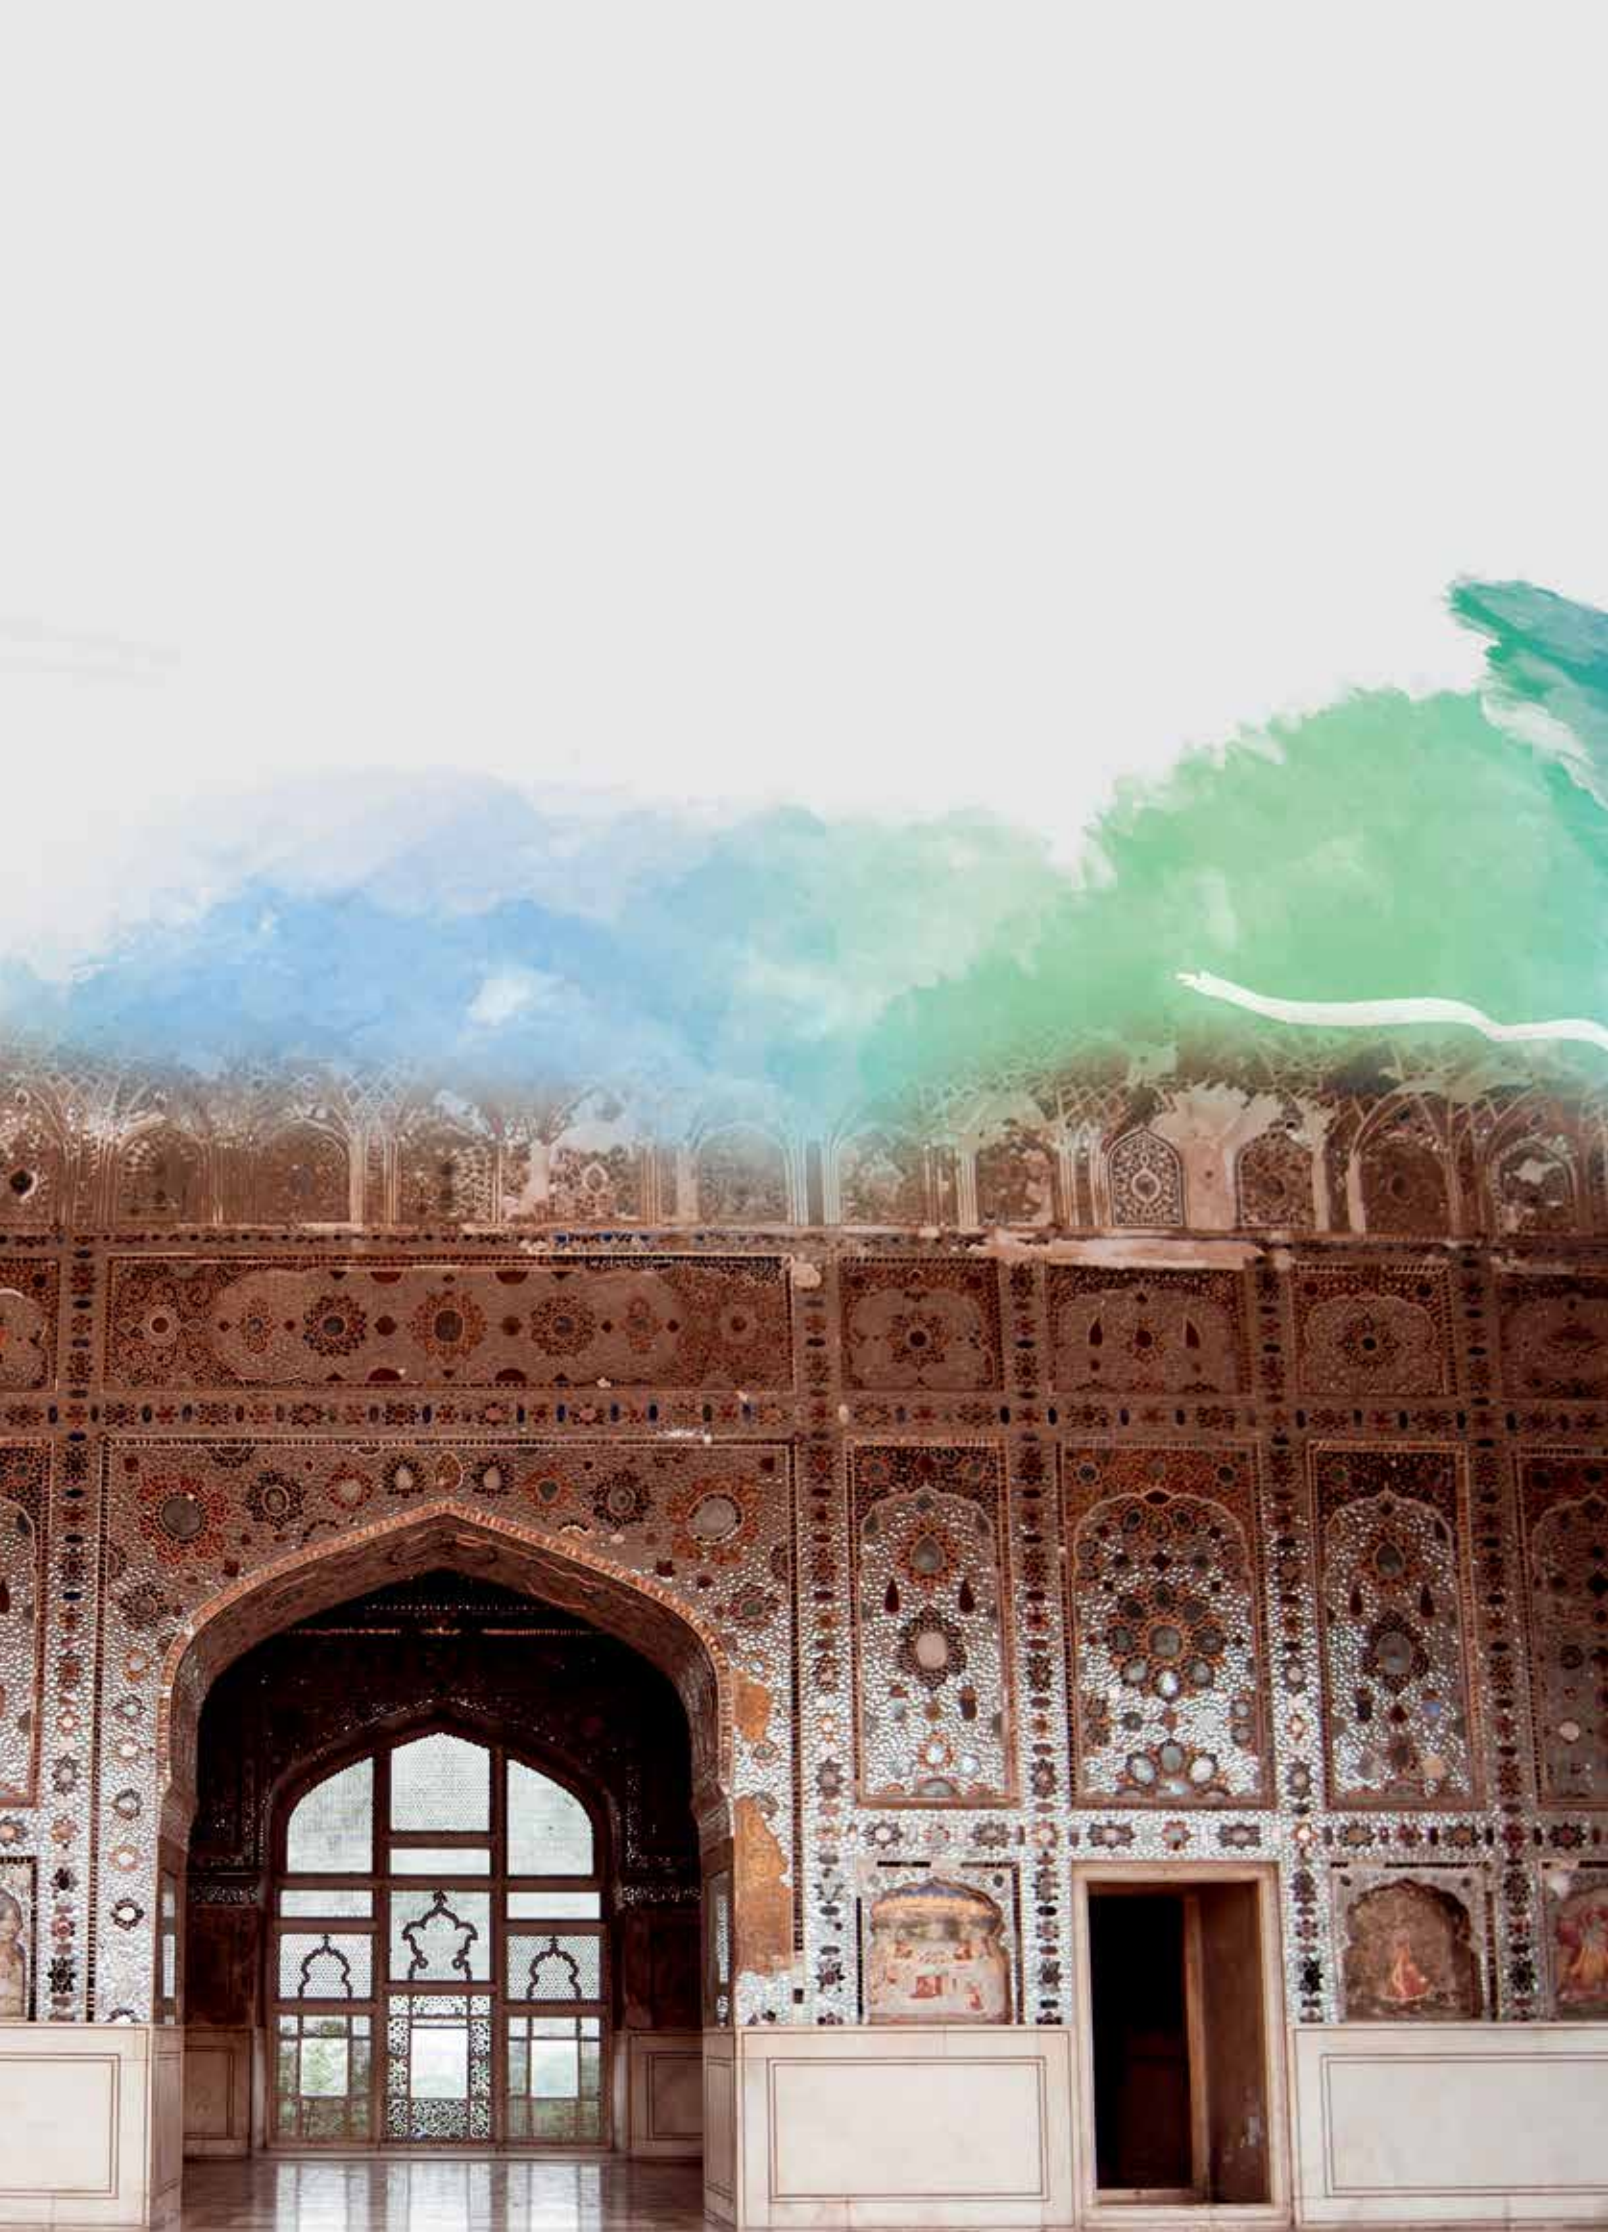

# Excellence is a Standard

A hidden gem in Bahawalpur, Noor Mahal is an elegantly built palace that brings together both Corinthian and Islamic styles of architecture in a magnificent structure. MCB Bank believes in operational excellence and moves with the times to bring our customers' aspirations to life.

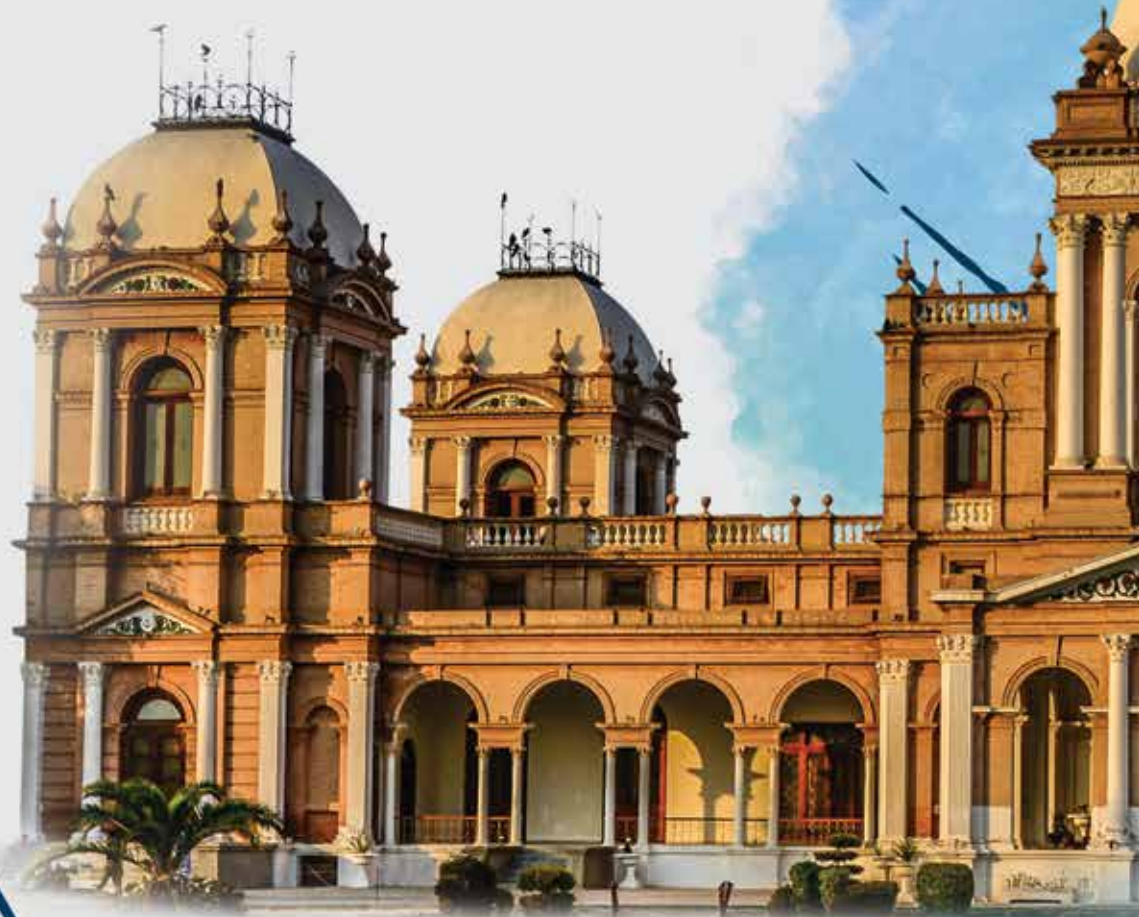

Noor Mahal



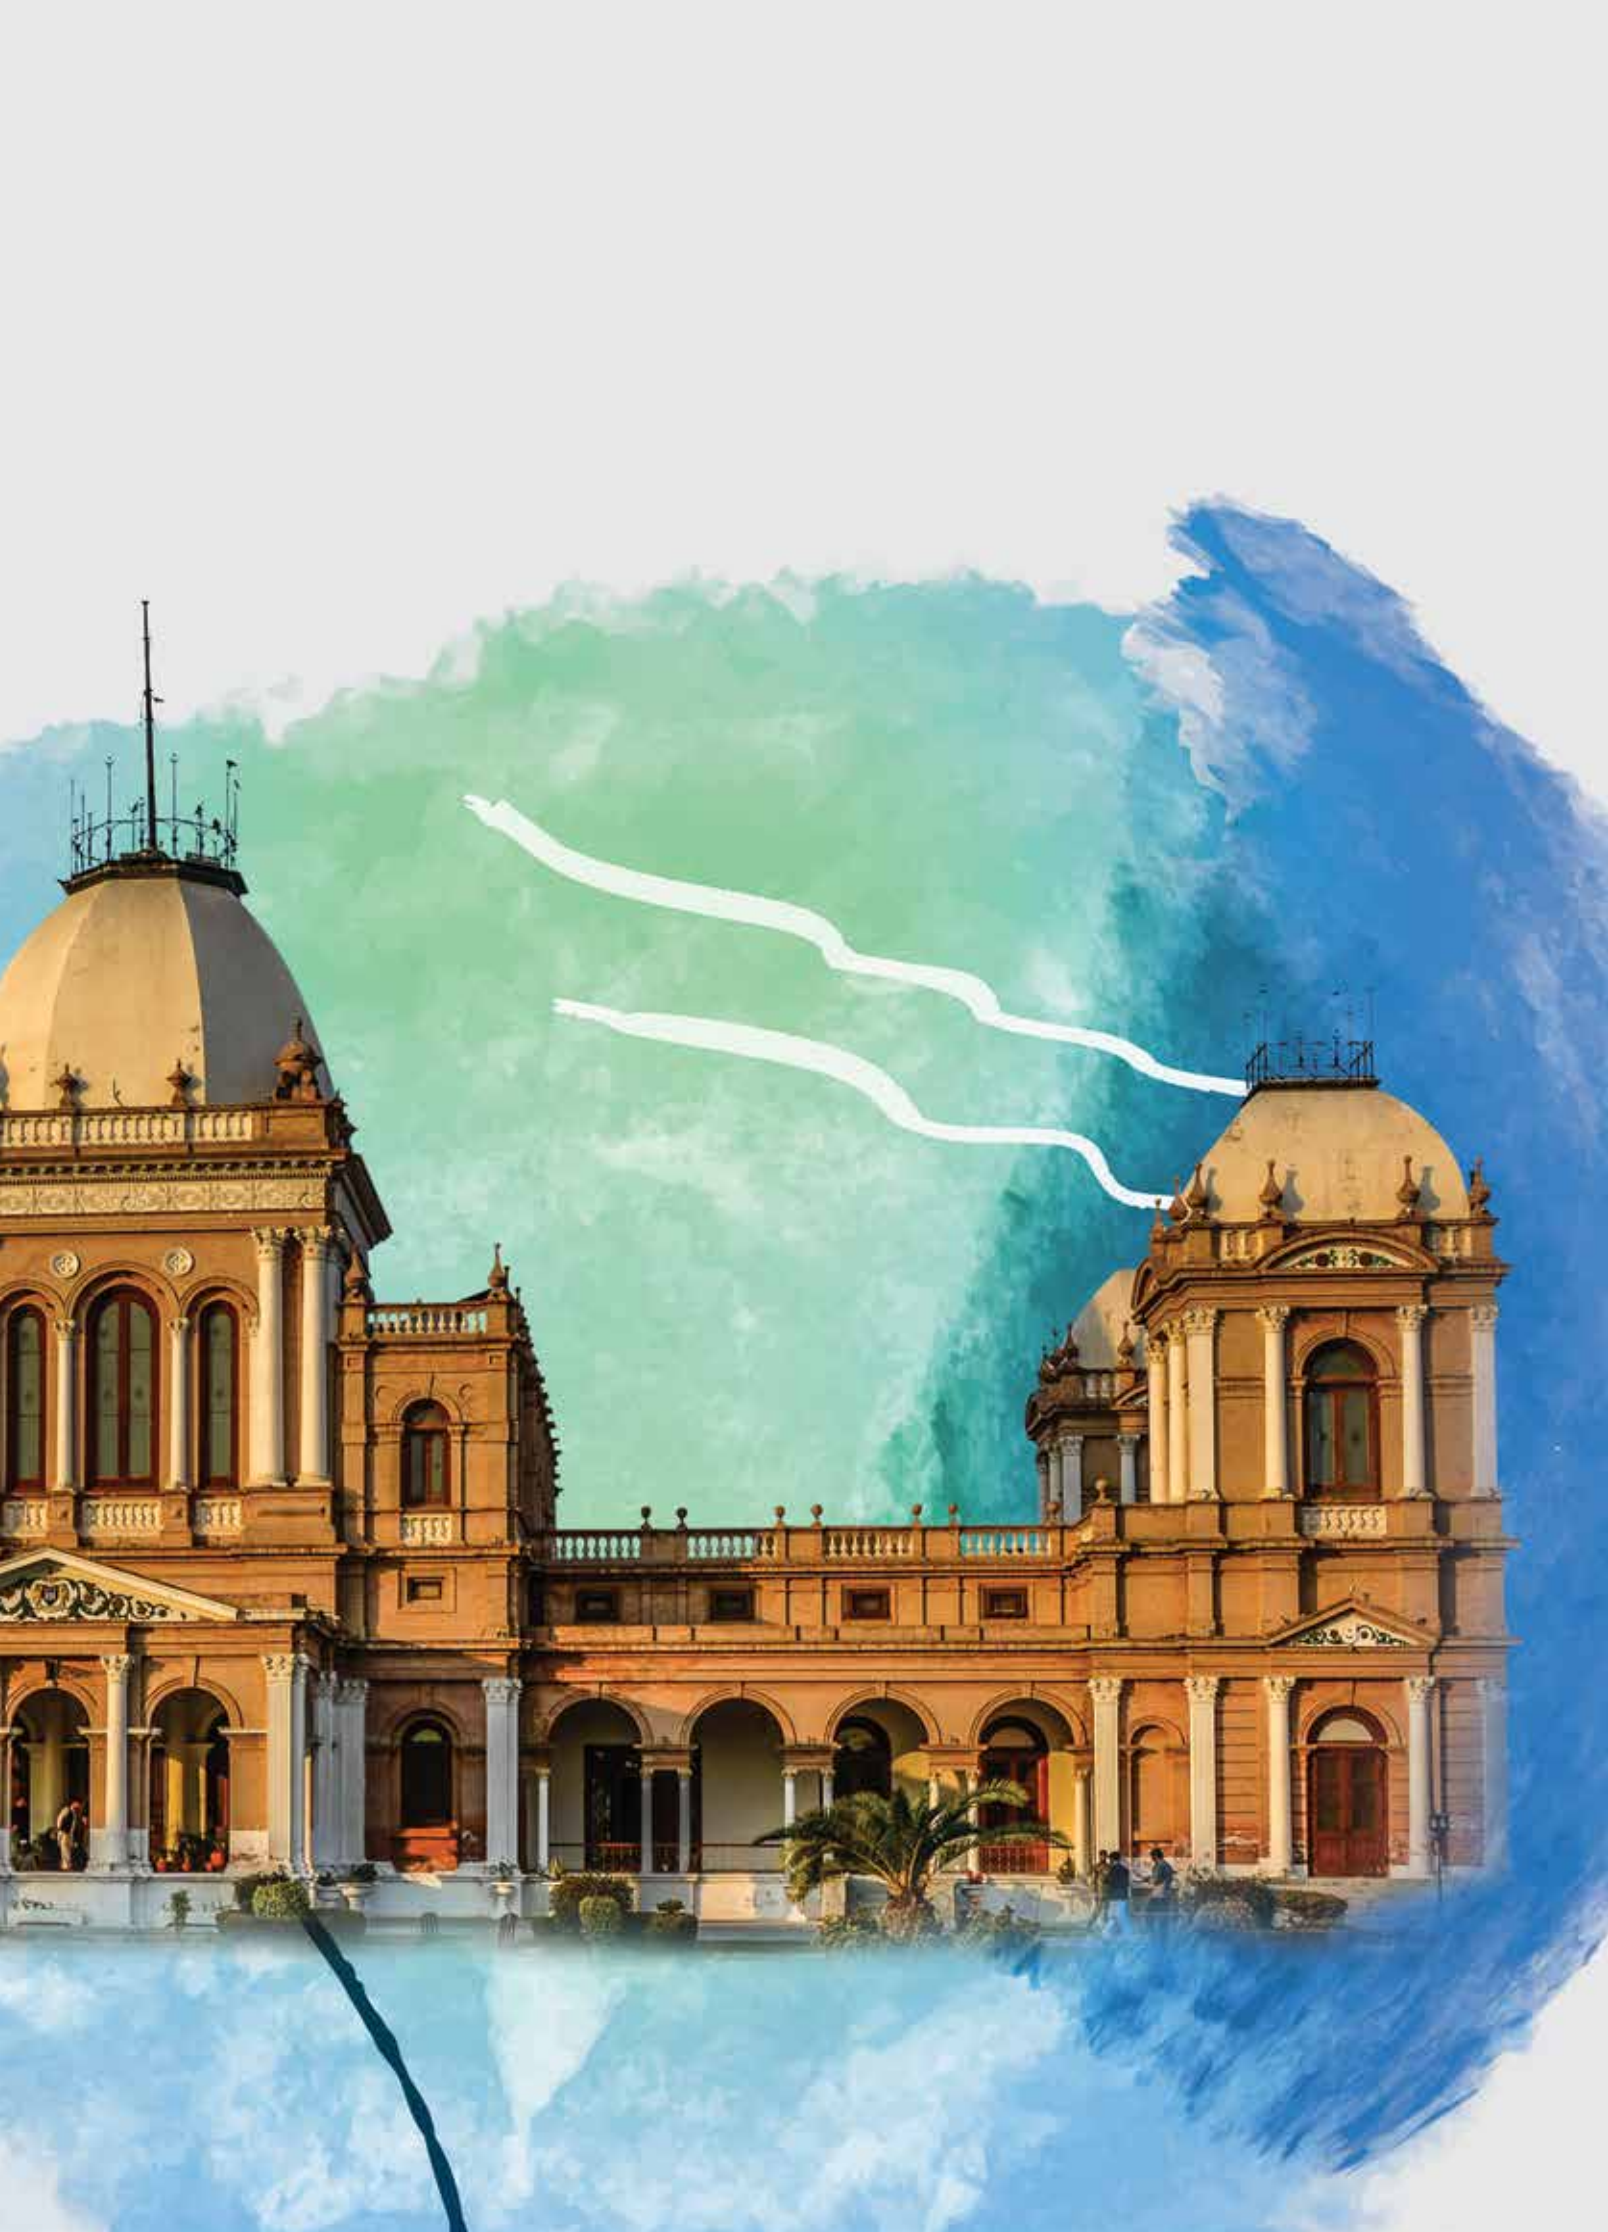

# Our **Customers** are Always Connected

Built more than a century ago, the General Post Office Building in Lahore is a conduit that manages about 20,000 pieces of mail a day, delivering them throughout the city. With over 1400 branches across the nation, MCB Bank is always connected to our customers, ensuring safe and easy access.

General Post Office

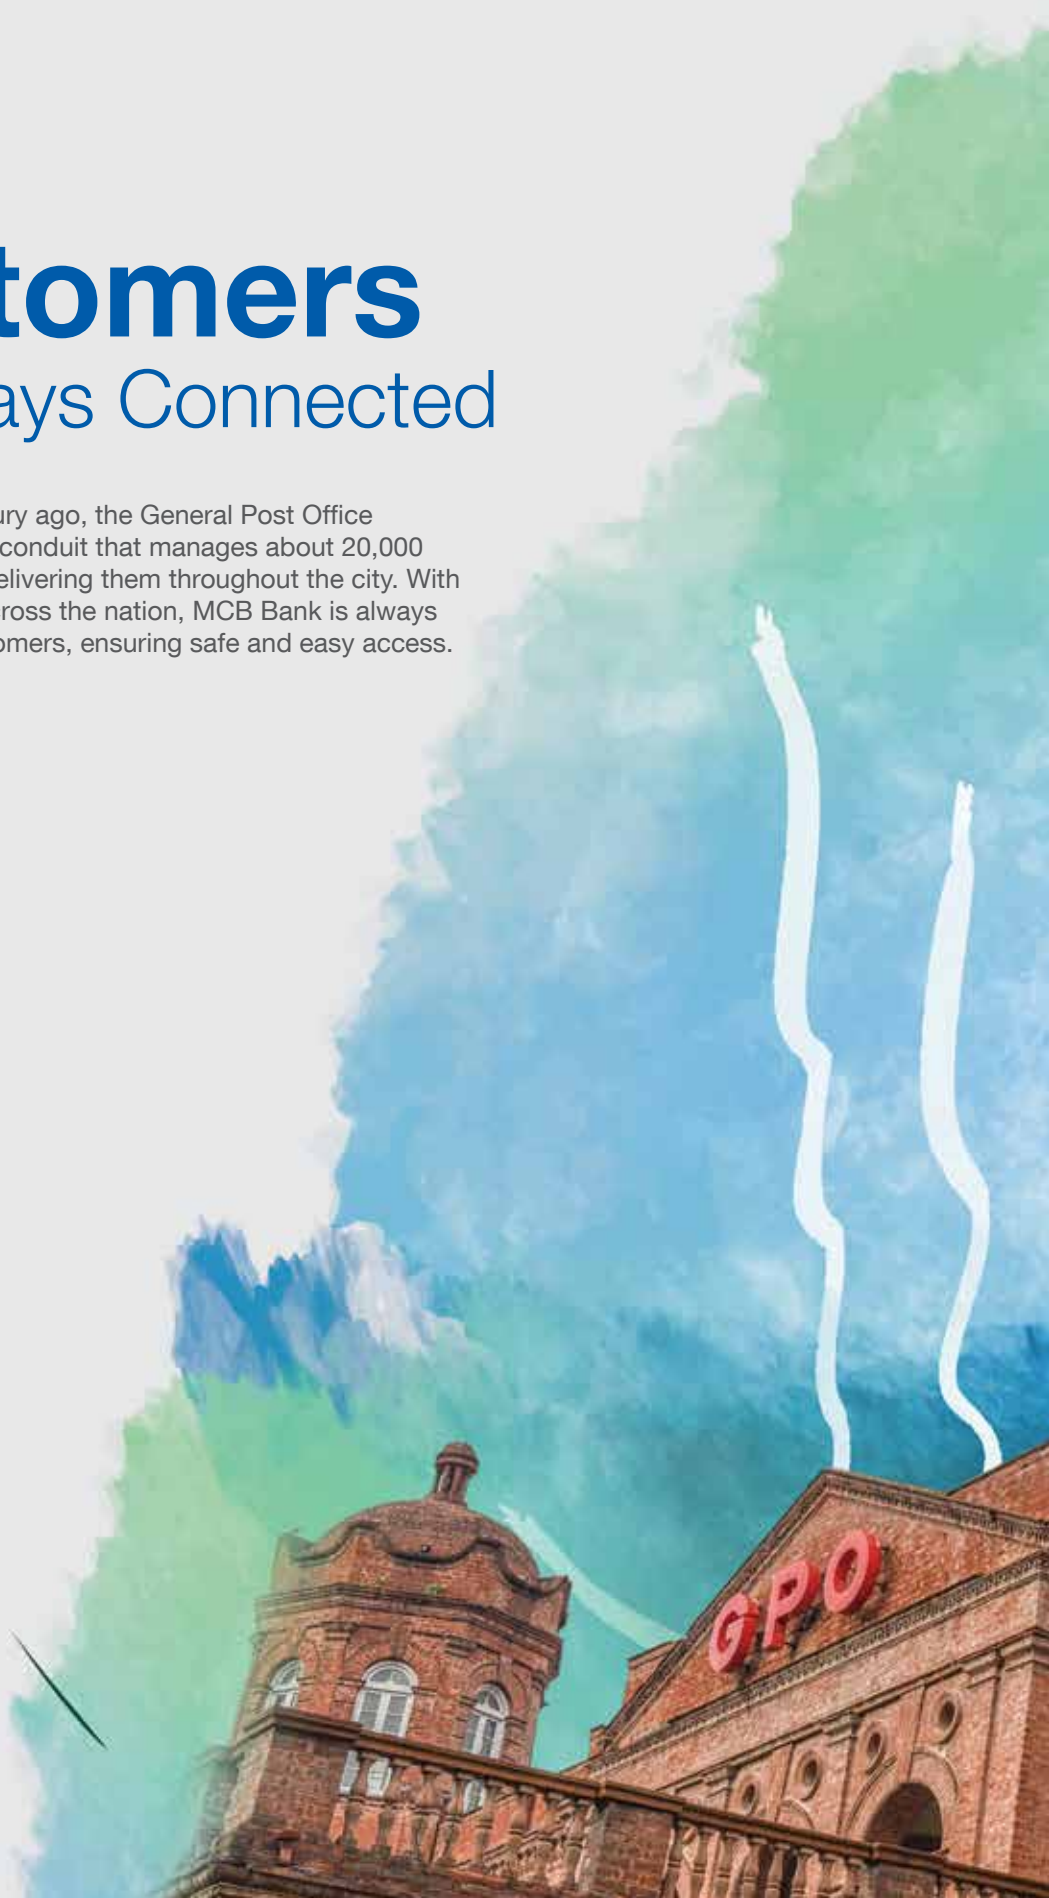

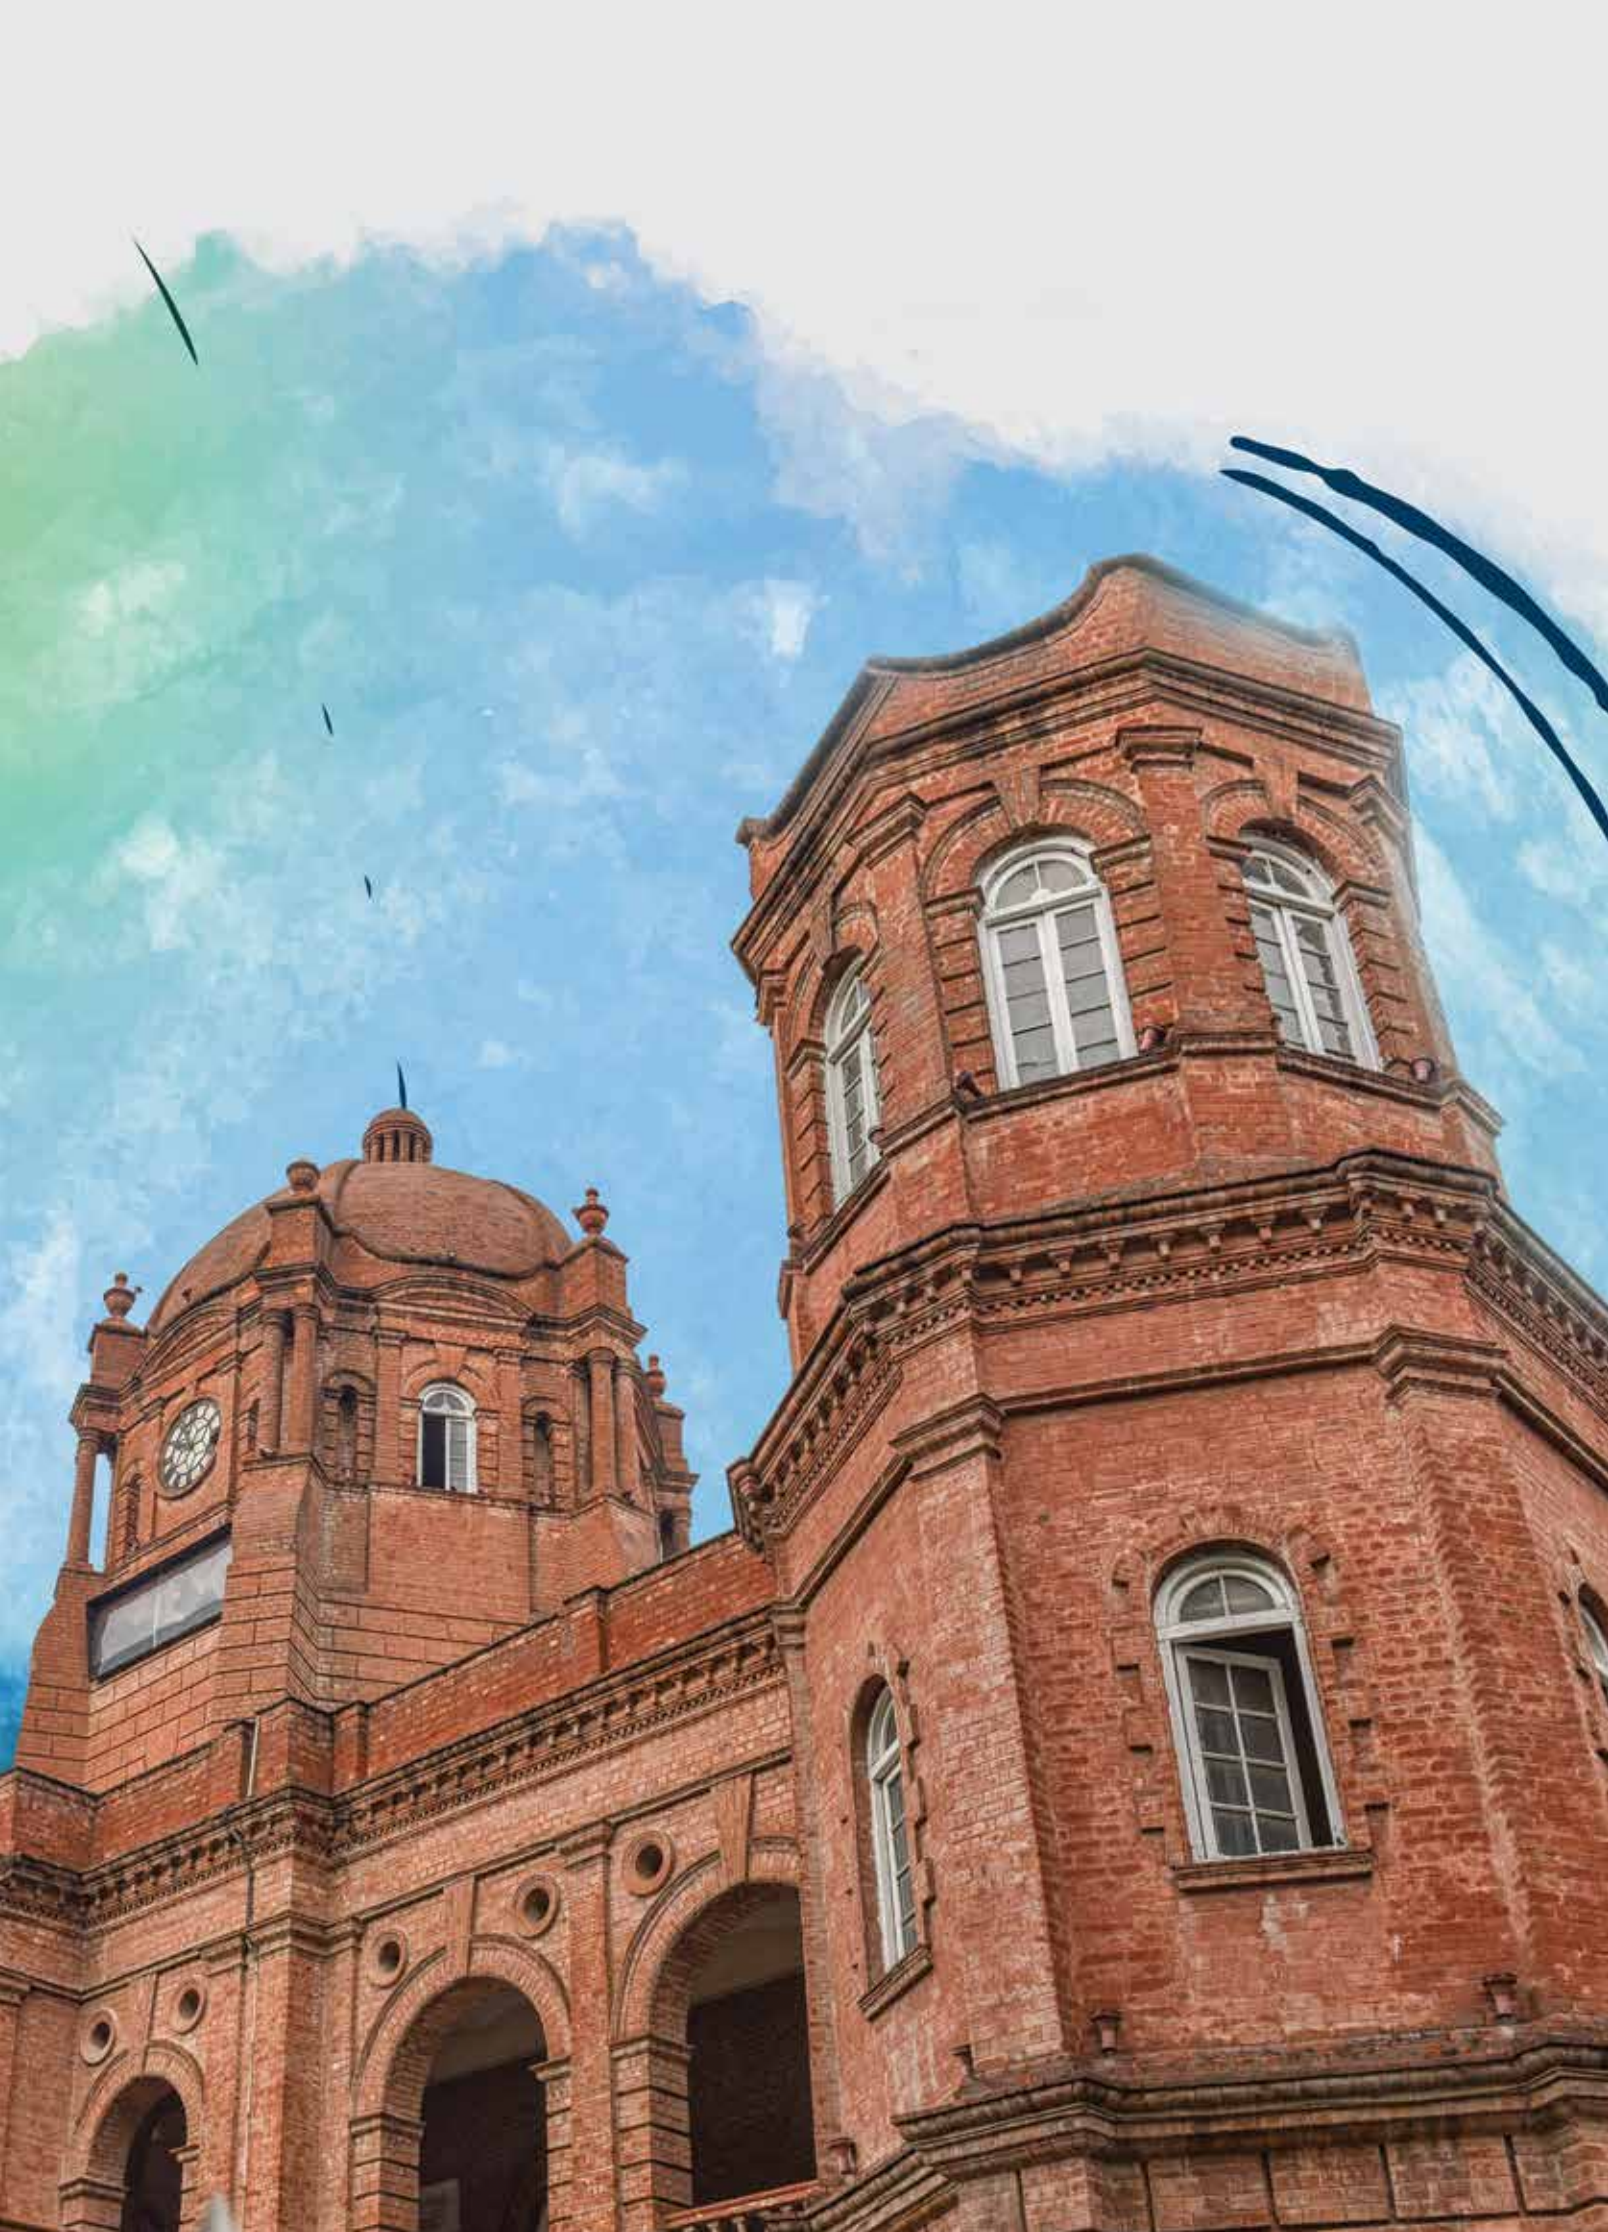

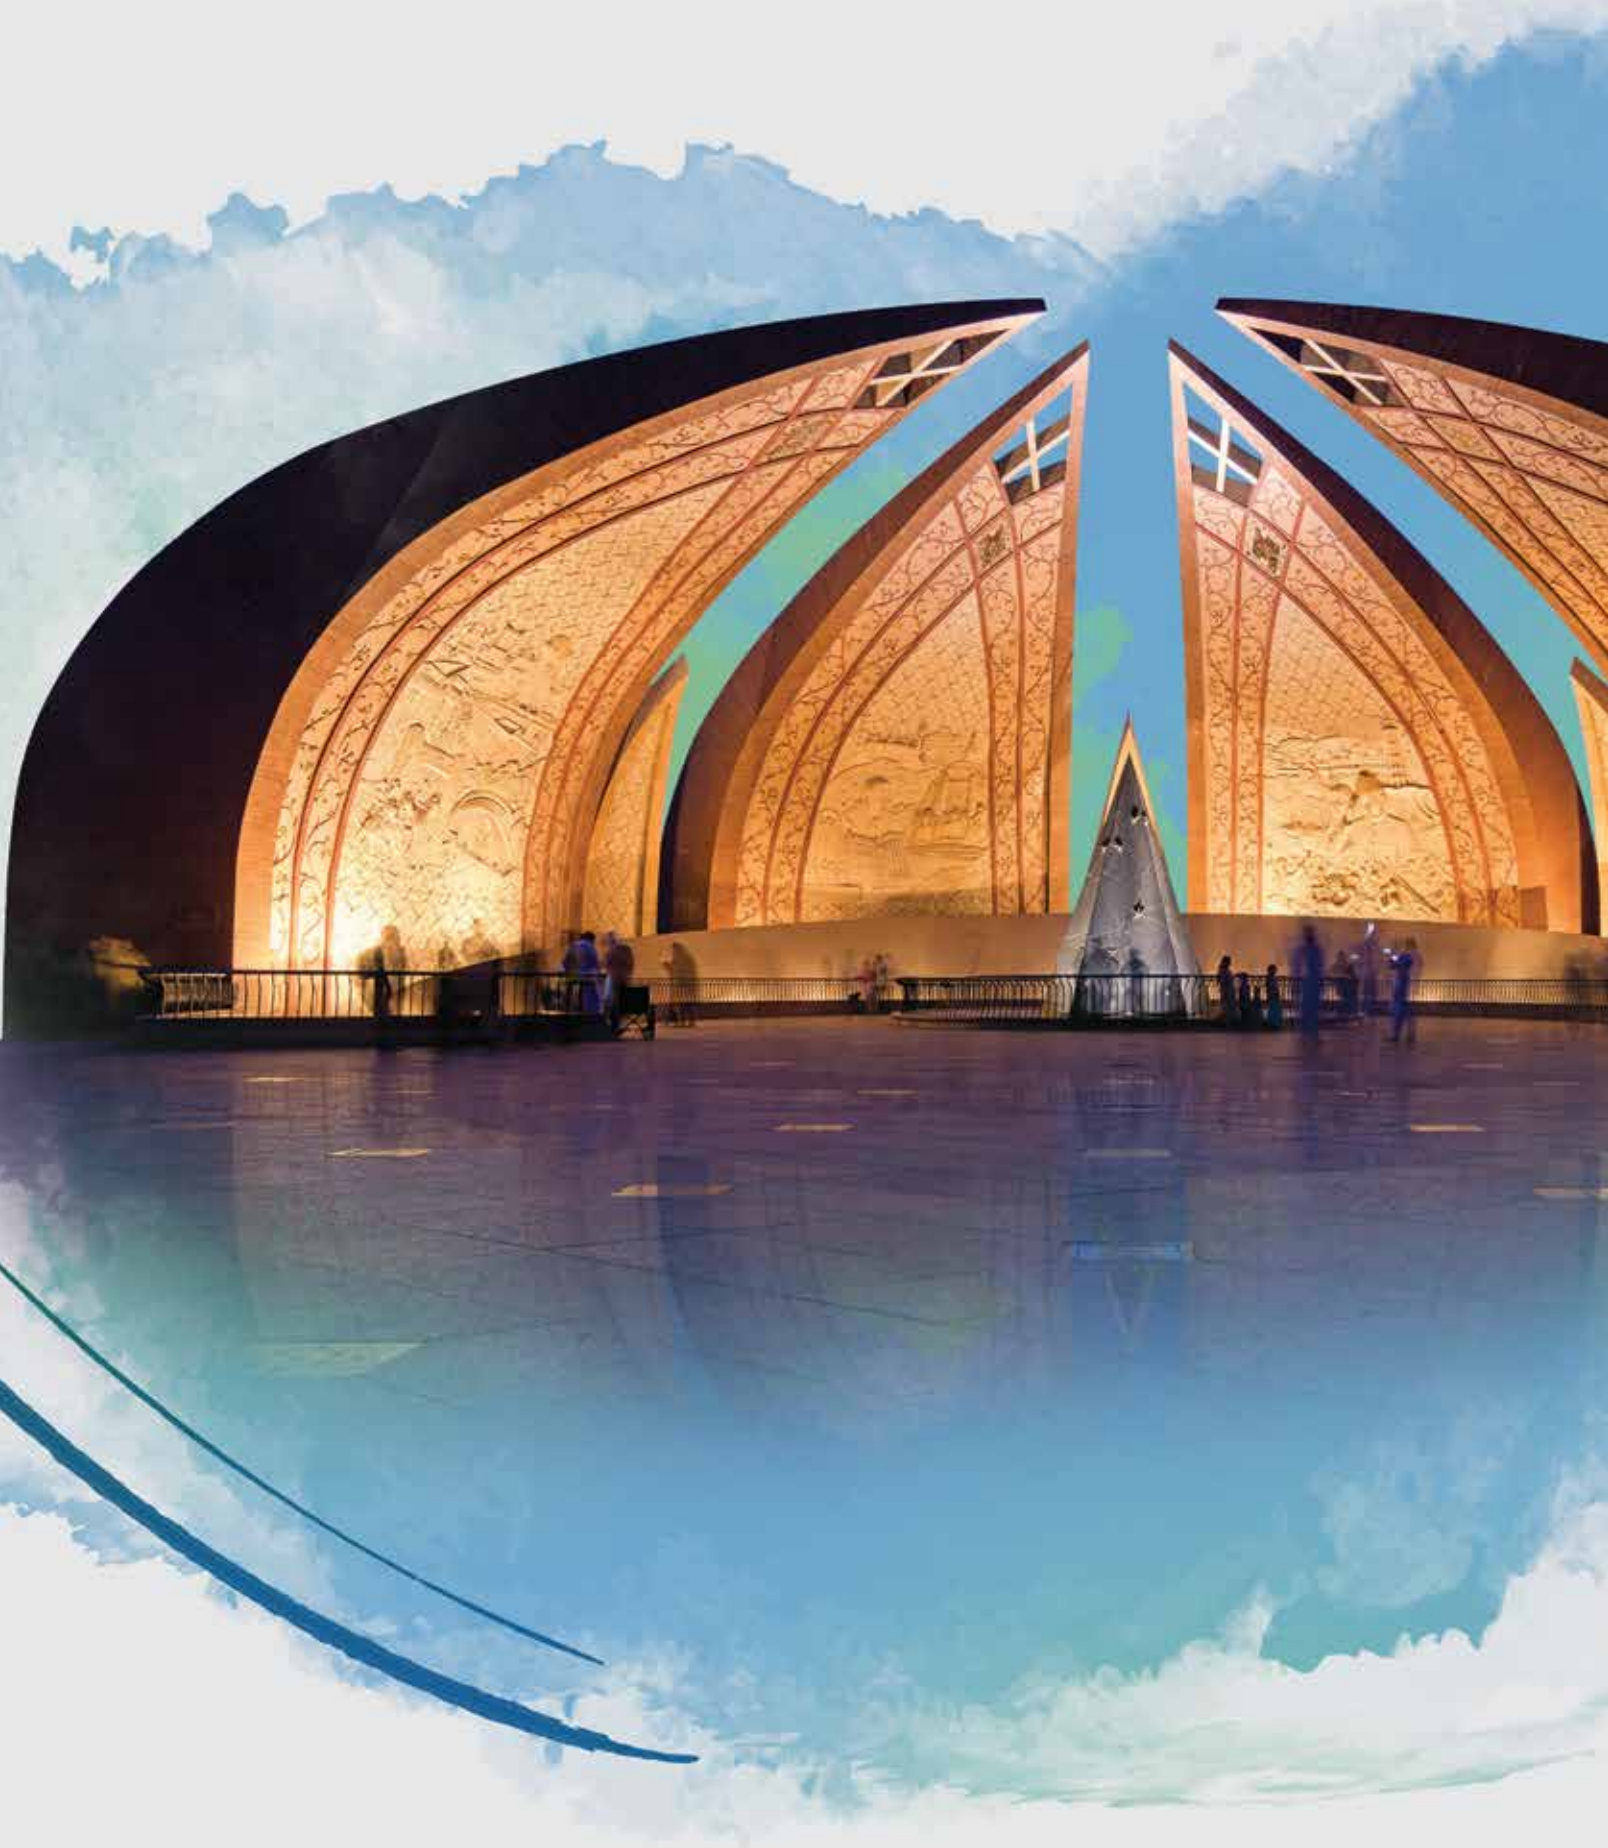

Pakistan Monument

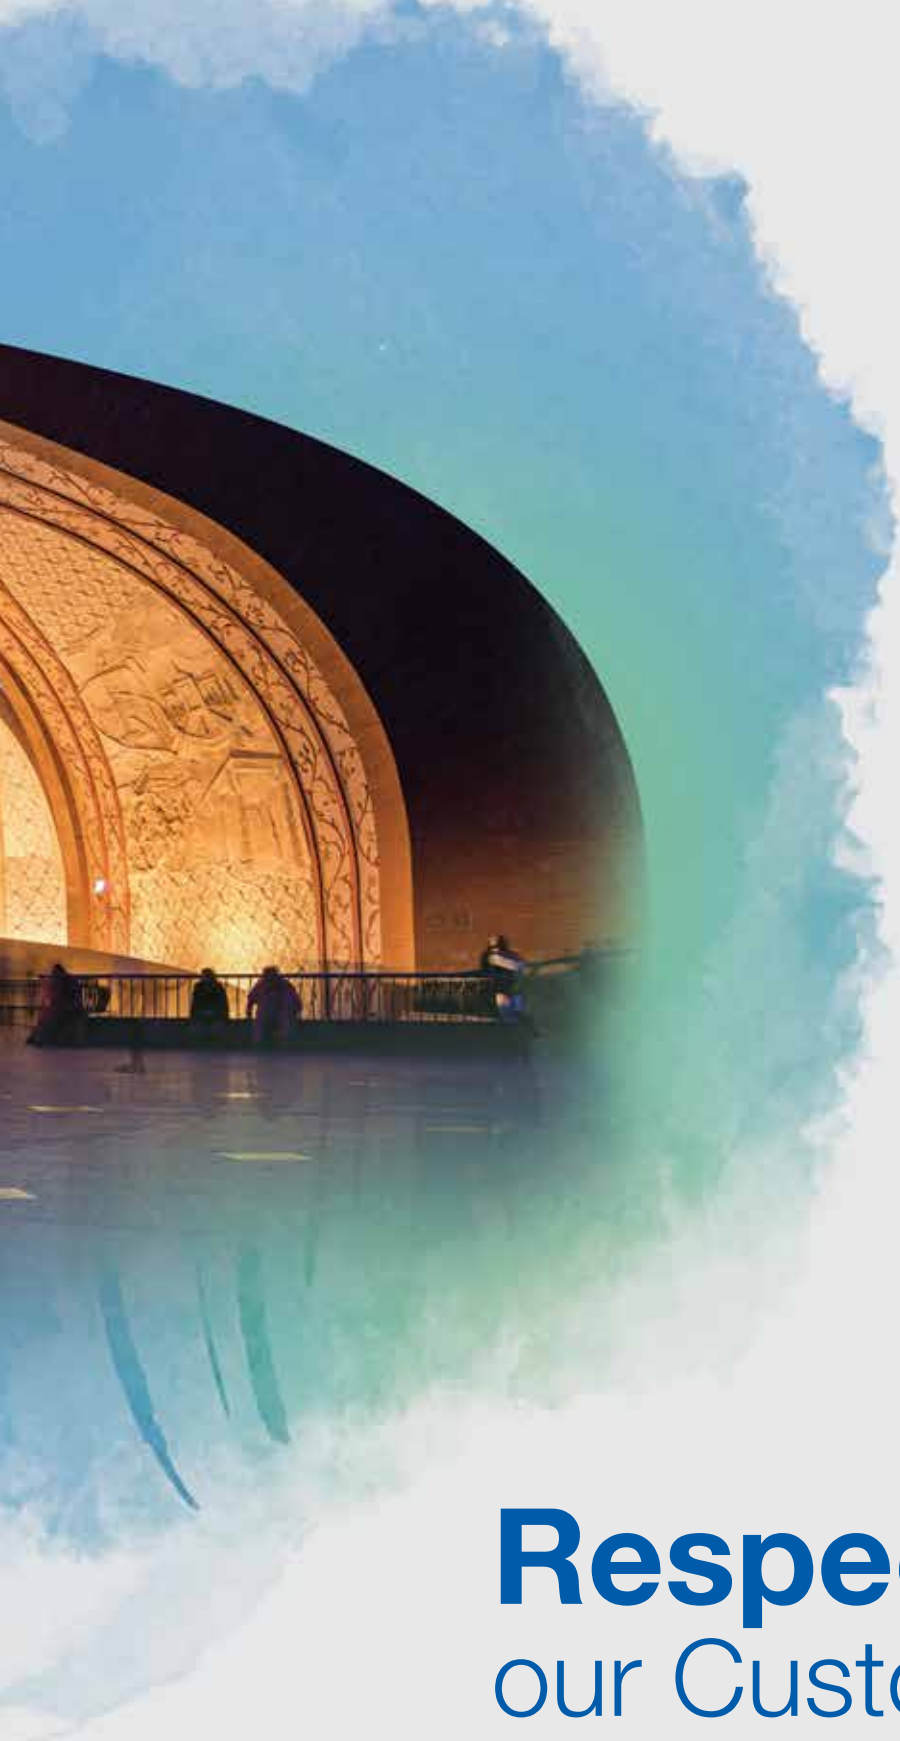

# Respecting our Customers

A striking structure in Islamabad, the Pakistan Monument was built to symbolize the unity of the country's people while also giving each province its due respect just as MCB Bank respects the needs and requirements of our customers.

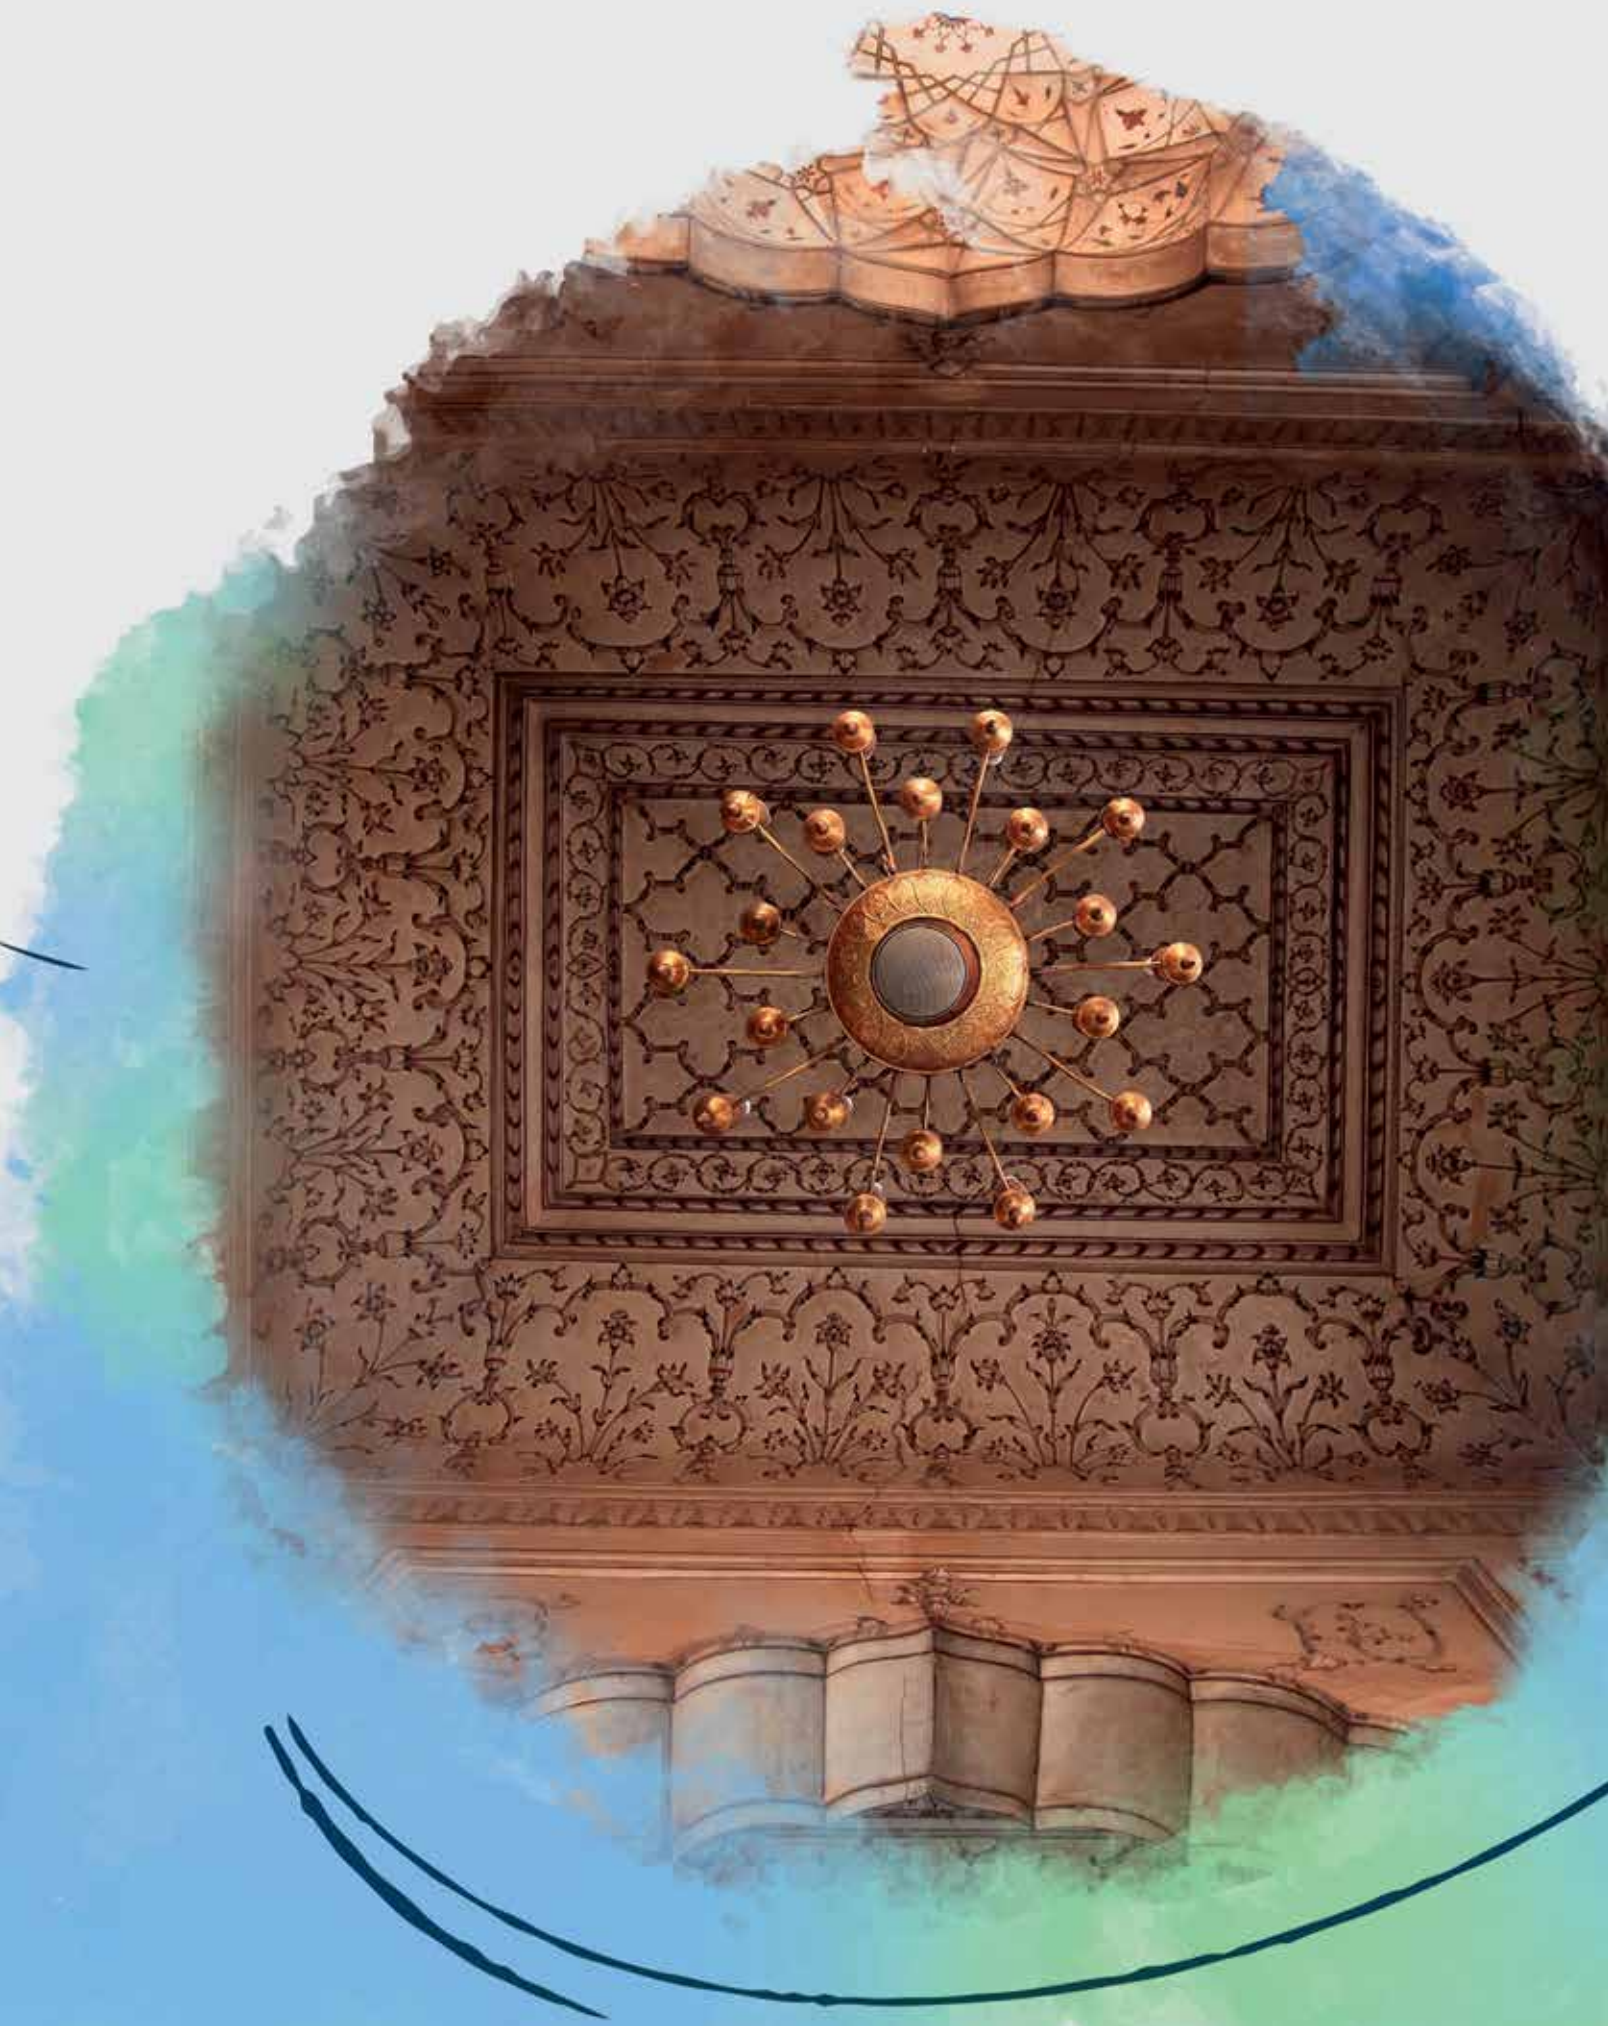

# Core Values

## **Integrity**

We are the trustees of public funds and serve our community with integrity. We believe in being the best at always doing the right thing. We deliver on our responsibilities and commitments to our customers as well as our colleagues.

## **Innovation**

We encourage and reward people who challenge the status quo and think beyond the boundaries of the conventional. Our teams work together for the smooth and efficient implementation of ideas and initiatives.

## **Excellence**

We take personal responsibility for our role as leaders in the pursuit of excellence. We are a performance driven, result oriented organization where merit is the only criterion for reward.

## **Customer Centricity**

Our customers are at the heart of everything we do. We thrive on the challenge of understanding their needs and aspirations, both realized and unrealized. We make every effort to exceed customer expectations through superior services and solutions.

## **Respect**

We respect our customers' values, beliefs, culture and history. We value the equality of gender and diversity of experience and education that our employees bring with them. We create an environment where each individual is enabled to succeed.

# Awards

2020 ABF Corporate & Investment Banking Awards  
 2020 ABF Corporate & Investment Banking Awards  
 2020 Asset AAA Infrastructure Awards  
 2020 Asset AAA Islamic Finance Awards  
 2020 Asset AAA Islamic Finance Awards  
 2020 Asset AAA Islamic Finance Awards  
 2020 Asiamoney Awards  
 2020 Asiamoney Awards  
 2020 ICAP and ICMAP  
 2020 SAFA Awards

2019 Asset Triple A Infrastructure Awards  
 2019 Asset Triple A Infrastructure Awards  
 2019 Asian Banking & Finance Corporate & Investment Banking Awards  
 2019 Asian Banking & Finance Corporate & Investment Banking Awards  
 2019 Asiamoney  
 2019 FinanceAsia  
 2019 ICAP and ICMAP  
 2019 SAFA Awards

2018 Asset Triple A Islamic Finance Awards  
 2018 Asset Triple A Infrastructure Awards  
 2018 Asset Triple A Infrastructure Awards

2018 Asset Triple A Infrastructure Awards  
 2018 Asset Triple A Infrastructure Awards  
 2018 Asiamoney Best Bank Awards  
 2018 FinanceAsia Country Awards for Achievement  
 2018 ICAP & ICMAP

2017 Euromoney Awards  
 2017 ICAP and ICMAP  
 2017 Assets AAA Islamic Finance Awards  
 2017 Assets AAA Infrastructure Awards  
 2017 Assets AAA Infrastructure Awards  
 2017 Assets AAA Infrastructure Awards  
 2017 Asiamoney Silk Road Finance Awards  
 2017 Asiamoney Silk Road Finance Awards  
 2017 Asian Banker Awards  
 2017 FinanceAsia Achievement Awards  
 2017 Assets AAA Country Awards  
 2017 CFA 14th Excellence Awards  
 2017 SAFA Awards  
 2017 SAFA Awards

Best Equity Deal of the Year- Pakistan  
 Syndication Loan of the Year- Pakistan  
 Telecom Deal of the Year in Pakistan  
 Best Corporate Sukuk  
 Best Acquisition Financing  
 Best Syndicated Loan  
 Overall Most Outstanding Company in Pakistan  
 Most Outstanding Company – Financials Sector in Pakistan  
 Best Corporate Report Award 2019 – Winner  
 Joint 1<sup>st</sup> Runner up Best Presented Annual Accounts 2019 - Banking Sector

Transport Deal of the Year  
 Utility Deal of the Year  
 Equity Deal of the Year – Pakistan  
 Mergers and Acquisitions Deal of the Year – Pakistan  
 Most Outstanding Company in Pakistan – Financial Sector  
 FinanceAsia Country Awards – Best Bank Pakistan  
 Best Corporate Report Award 2018 – Winner  
 Certificate of Merit 2018 – Private Bank Category

Best Islamic Loan Adviser, Pakistan  
 Project Finance House of the Year, Pakistan  
 Renewable Energy Deal of the Year – Solar, Pakistan to MCB Bank Limited, MCB Bahrain & MCB Dubai  
 Oil and Gas Deal of the Year, Pakistan  
 Telecom Deal of the Year, Pakistan  
 Best Domestic Bank  
 Best Bank in Pakistan  
 Best Corporate Report Award 2017 - Winner

Best Investment Bank in Pakistan  
 Best Corporate Report Award 2016 - Winner  
 Best Project Finance House in Pakistan  
 Project Finance House of the Year in Pakistan  
 Renewable Energy Deal of the Year  
 Transport Deal of the Year  
 Best Regional Bank in South Asia for Belt & Road Initiative (BRI)  
 Best Bank in South Asia for Belt & Road Initiative (BRI)  
 Strongest Bank in Pakistan  
 Best Pakistan Deal, IPO of Pakistan Stock Exchange  
 Best Equity Pakistan IPO of Pakistan Stock Exchange  
 Runner Up - Corporate Finance House of the Year  
 Certificate of Merit Best Presented Accounts 2016 - Banking Sector  
 Certificate of Merit SAARC Anniversary Awards for Corporate Governance

## 2020 Asiamoney Awards

Overall Most Outstanding  
 Company in Pakistan

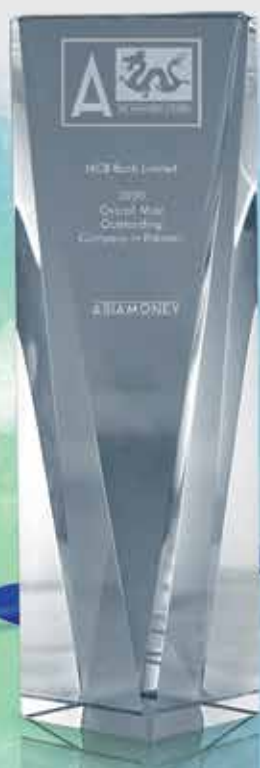

## 2020 Asiamoney Awards

Most Outstanding Company  
 Financial Sector in Pakistan

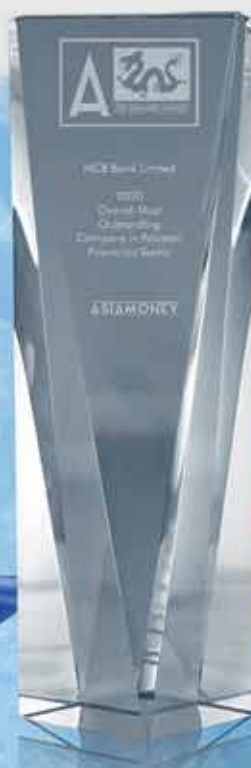



2016 Euromoney Awards  
2016 1st Pakistan Banking Awards  
2016 Finance Asia Country Awards  
2016 ICAP and ICMAP  
2016 First Global Awards  
2016 Assets AAA Country Awards  
2016 SAFA Awards  
2016 SAFA Awards

2015 CFA 12th Excellence Awards  
2015 Finance Asia Country Awards  
2015 ICAP and ICMAP  
2015 SAFA Awards

2014 The Asset Triple A  
2014 The Asset Triple A  
2014 CFA 11th Excellence Awards  
2014 CFA 11th Excellence Awards  
2014 Asiamoney Awards  
2014 The Asian Banker (USA)  
2014 ICAP and ICMAP  
2014 SAFA Awards

2013 The Asset Triple A  
2013 The Asset Triple A  
2013 ICAP and ICMAP  
2013 LK Domain Registry Sri Lanka  
2013 Lanka Clear Pvt. Limited  
2013 SAFA Awards

2012 The Asset Triple A  
2012 Euromoney  
2012 NFEH  
2012 ICAP and ICMAP  
2012 World Finance  
2012 Pakistan Centre for Philanthropy  
2012 SAFA Awards

2011 CFA Association Pakistan  
2011 CFA Association Pakistan  
2011 Euromoney  
2011 ICAP / ICMAP  
2011 SAFA Awards

2010 The Asian Banker  
2010 The Asian Banker  
2010 MMT  
2010 ICAP / ICMAP  
2010 SAFA Awards

2009 Asiamoney  
2009 The Asset

2008 Euromoney  
2008 Euromoney  
2008 Asiamoney

2006 Asiamoney  
2006 Euromoney

2005 Asiamoney  
2005 Euromoney

2004 Euromoney  
2004 Asiamoney

2003 Euromoney

2001 Euromoney

2000 Euromoney

Best Bank in Pakistan 2016  
Best Bank for Corporate Finance & Capital Market Development  
Best Bank in Pakistan 2016  
Best Corporate Report Award 2015 - Winner  
Most Innovative Investment Bank for Islamic Finance  
Best Micro Finance Deal for National Rural Support Programme  
Certificate of Merit Best Presented Accounts 2015 - Banking Sector  
Certificate of Merit SAARC Anniversary Awards for Corporate Governance

Most Stable Bank of the Year 2014  
Best Bank in Pakistan 2015  
Best Corporate Report Award 2014 - Winner  
Winner of Best Presented Annual Accounts 2014 - Banking Sector

Best Bank - Pakistan  
Best Domestic Bank - Pakistan  
Best Bank of the Year 2013 – Large Bank  
Most Stable Bank of the Year 2013  
Best of the Best Domestic Bank  
Strongest Bank in Pakistan 2014  
Best Corporate Report Award 2013 - Winner  
1st Runner up Best Presented Annual Accounts 2013 - Banking Sector

Best Domestic Bank - Pakistan  
Best Islamic Deal  
Best Corporate Report Award 2012 - Winner  
Best Website Award  
T+1 Cheque Clearing Award  
Certificate of Merit Best Presented Annual Accounts 2012 - Banking Sector

Best Domestic Bank - Pakistan  
Best Bank in Pakistan  
CSR Business Excellence Award "Best Media Coverage"  
2nd Best Corporate Report Award 2011 - Banking Sector  
Best Commercial Bank - Pakistan  
PCP Corporate Philanthropy Award  
2nd Runner up Best Presented Annual Accounts 2011 - Banking Sector

Most Stable Bank of the Year  
Best Bank of the Year  
Best Bank in Pakistan  
Best Corporate Report Award 2010 - Winner  
Joint 2nd Runner up Best Presented Annual Accounts 2010 - Banking Sector

Strongest Bank in Pakistan  
Leadership Achievement Award  
Best Bank Led MMT Service  
Best Corporate Report Award 2009 - Winner  
Certificate of Merit Best Presented Annual Accounts 2009 - Banking Sector

Best Domestic Bank in Pakistan  
Best Domestic Bank in Pakistan

Best Bank in Asia  
Best Bank in Pakistan  
Best Domestic Bank in Pakistan

Best Domestic Bank in Pakistan  
Best Bank in Pakistan

Best Domestic Bank in Pakistan  
Best Bank in Pakistan

Best Bank in Pakistan  
Best Domestic Bank in Pakistan

Best Bank in Pakistan

Best Bank in Pakistan

Best Bank in Pakistan

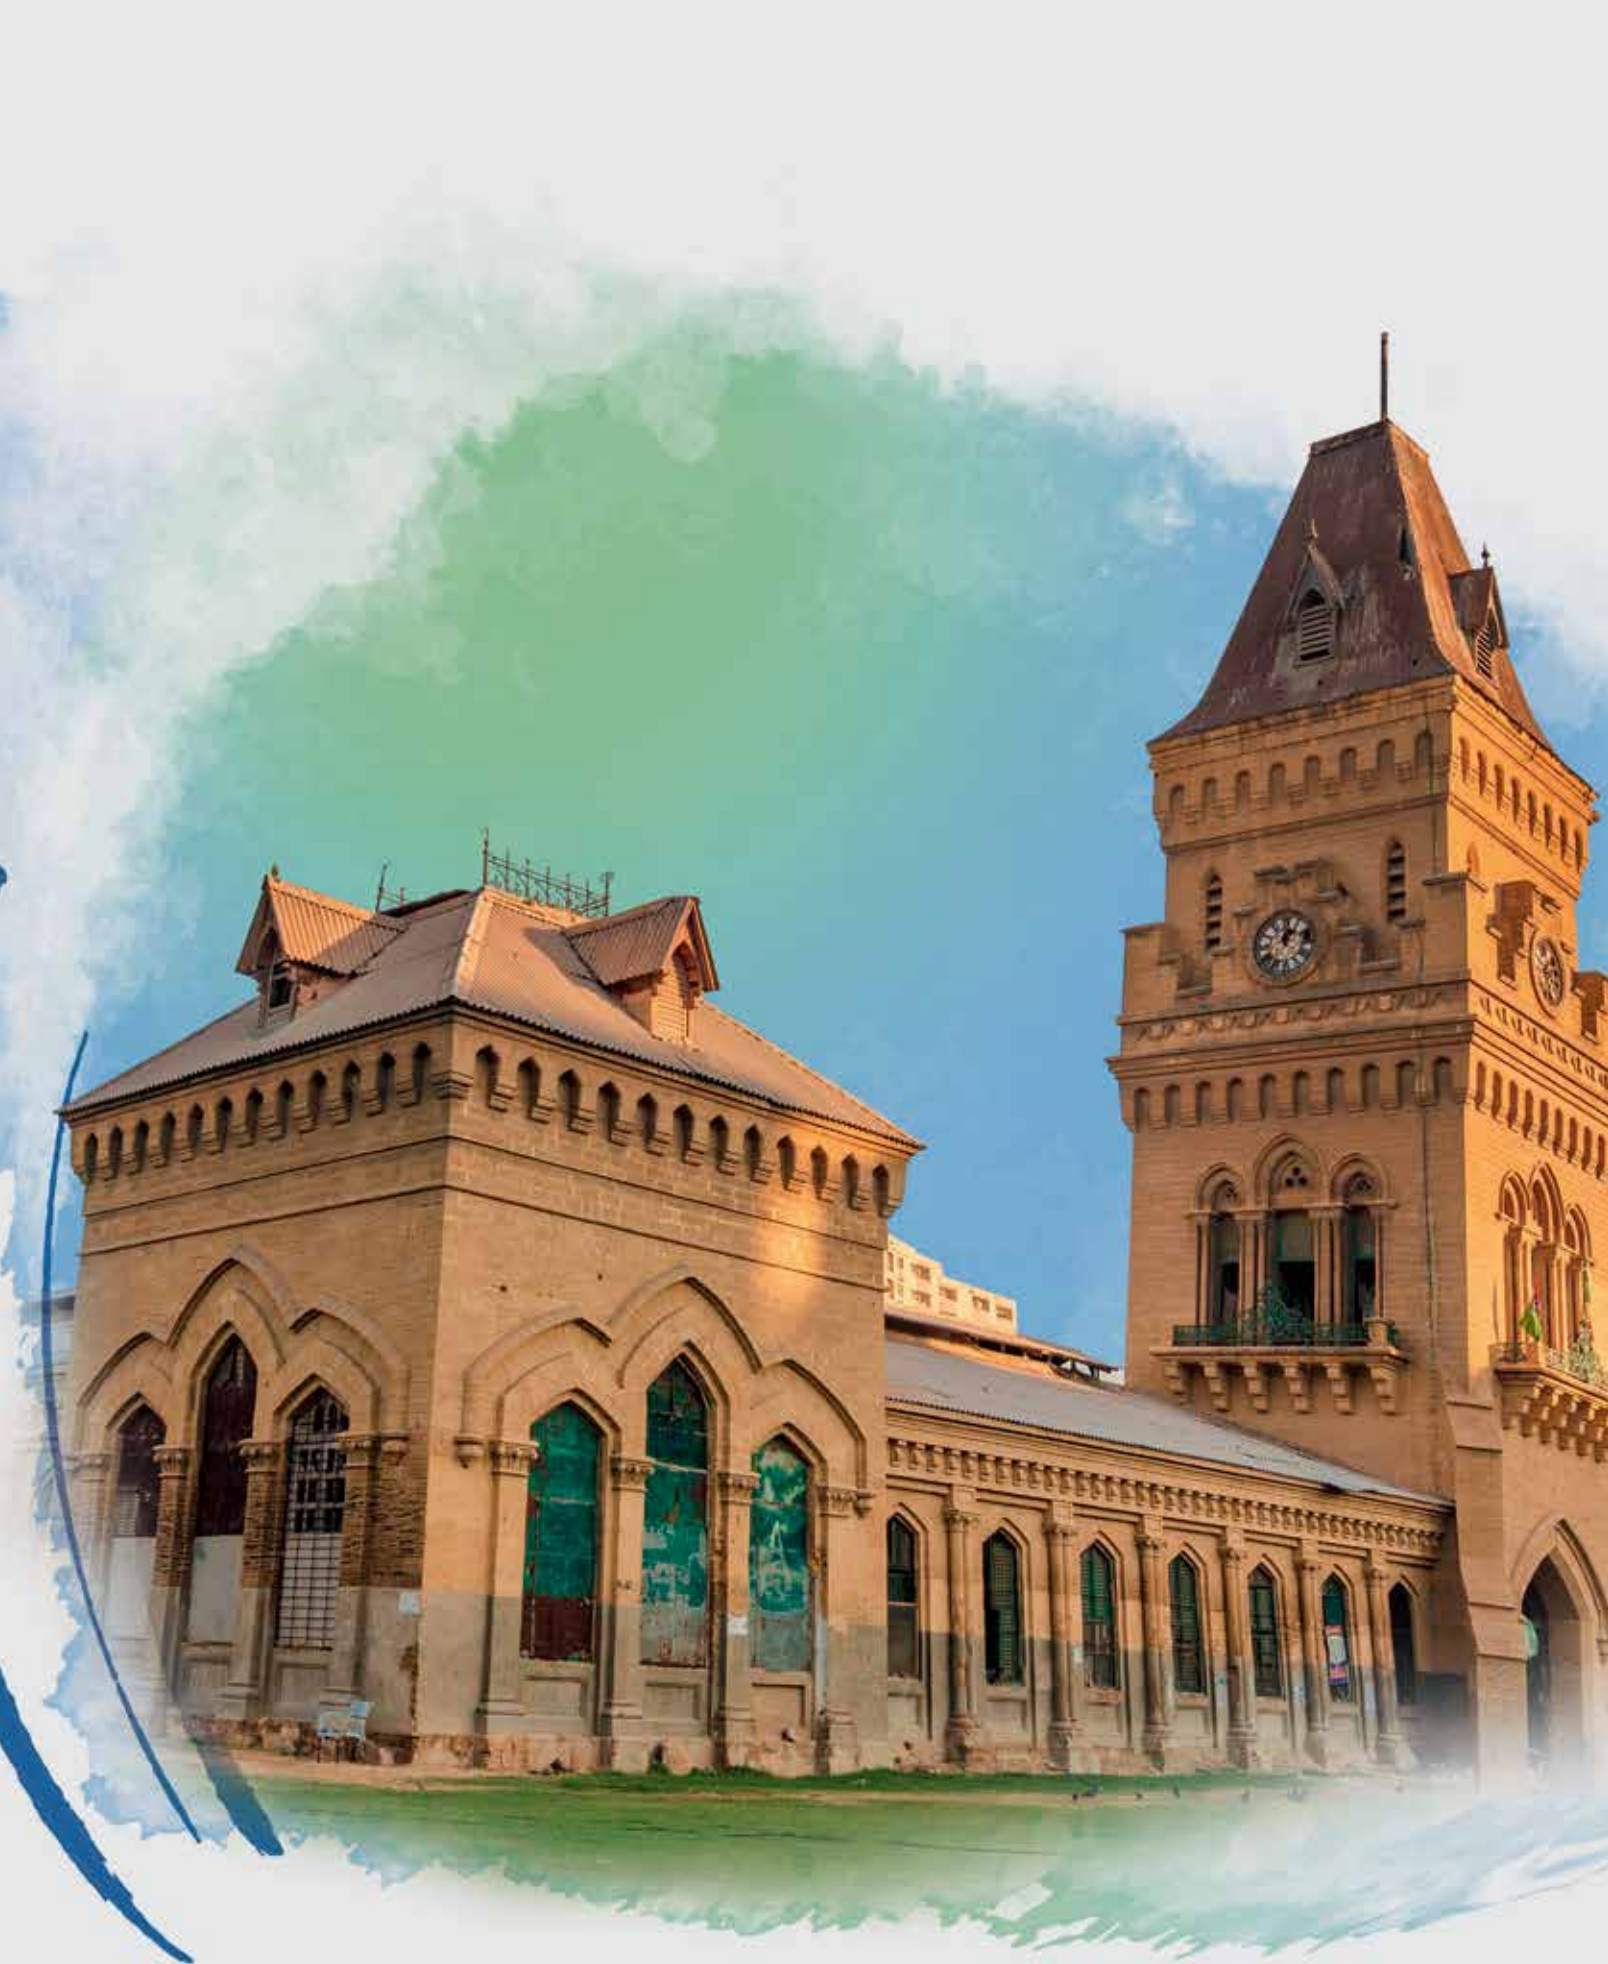

Empress Market

# Products & Services

## **MCB Liability Products**

MCB Bank offers a wide variety of products and services, hence ensuring ease and freedom for the customer to bank from its branch network comprising of 1,400+ locations geographically spread across the country. The product suite caters to all types of customer segments' banking needs ranging from individuals to corporate entities. Below are the main categories of liability products followed by product wise details.

## **MCB Current Deposit Products Category**

For complete day-to-day banking needs, MCB Current Deposit menu is offered in local and foreign currency and is designed to provide valued customers with transactional accessibility and flexibility for all their financial dealings.

## **MCB Savings Deposit Products Category**

MCB Bank offers a wide array of local and foreign currency savings products that cater to their daily saving and transactional needs. With multiple profit payment options, the savings deposit menu offers attractive profit rates on various savings products.

## **MCB Term Deposit Products Category**

MCB Term Deposits offer attractive short / medium / long term investment options with flexibility, convenience and security. With various tenors, multiple currency and profit payout options, customers can choose the one that best suits their needs. For further convenience, facility of rollover and renewal is also available. Additionally, these term deposits can also be collateralized to avail credit facilities.

In order to meet the needs of MCB Bank's diverse clientele, the Bank is offering a plethora of products perfectly suited for each segment's needs:

- **MCB One Current Account:** A unique all-in-one tiered product that caters to the checking account needs of all customer segments and demographics. MCB One Current Account is a holistic financial solution that provides free services (banker's cheque, cheque book, debit card, intercity transactions, SMS facility, e-statement). These unique benefits vary based on average monthly account balances.

- **Roshan Digital Account:** Roshan Digital Account (RDA) is a flagship initiative of State Bank of Pakistan. It is a tailor-made digital financial solution, designed to facilitate Non-Resident Pakistanis (NRPs) and Resident Pakistanis (with declared foreign assets). The account provides innovative banking services in Pakistan including but not limited to digital payments, savings and investments. RDA is available in both current and savings variants. For the first time in Pakistan, NRPs are being provided the opportunity to remotely open an account through a digital process without the need to visit a bank/ branch in-person. The customer can open RDA in PKR and multiple foreign currencies and with minimal documentation. Through this account, customers can invest in lucrative Naya Pakistan Certificates, Government of Pakistan securities, real estate and Pakistan Stock Exchange among many other facilitations. Most of the products and services associated with Roshan Digital Account are free of charge.
- **MCB Smart Business Account:** A business account variant offering free services & transaction facilities by maintaining a minimal average balance requirement. The account is targeted towards business entities in a more segmented and focused manner.
- **MCB Salary Club Account:** A unique product offering targeted towards institutions / companies to manage payroll by getting employee accounts opened with MCB Bank. MCB Salary Club Account has both Current and Savings variants through which employees can avail various free benefits & discounts on different services.
- **MCB Ladies Account:** MCB Ladies Account is targeted specifically towards women with the main objective to create a niche for females of Pakistan and give them the freedom of managing their own finances with a sense of security and independence. This product offers various benefits including free insurance with a unique blend of health, accident, critical illness and death coverage along with attractive discounts on other services. The merchandise is feminist in its design / colors and the customer is given multiple options to choose a cheque book or a debit card of choice.
- **MCB Senior Citizens Account:** MCB Senior Citizens Account comes in both Current and Savings variants and aims to provide exclusive privileges in order for our elderly customers to take care of their financial needs with ease, while providing discounts on a wide array of services. 50% discount on numerous services can be availed by opening up a MCB Senior Citizens Account.
- **MCB Pensioners Account:** MCB Pensioners Account comes in both Current and Savings variants and allows account holders to live their lives to the fullest and face the future with confidence. This account is designed especially to cater to the financial needs of pensioners and is in compliance with regulatory governance. 50% discount on numerous services can be availed by opening up a MCB Pensioners Account.
- **MCB Asaan Account:** A current deposit account with simplified account opening requirements is designed to extend benefits of financial services to unbanked segments of society. This product aims to improve economic growth of potential customers under the financial inclusion initiative of State Bank of Pakistan.
- **MCB 365 Savings Gold Account:** This account enables customers to enjoy attractive returns on their deposits on a monthly basis. Special saving rates are offered to entities / institutions / corporates on maintaining large deposits intermittently.
- **MCB Burqraftaar Remittance Account:** This is a promising product to serve home remittance consumers with security, convenience, and accessibility. Remitters from various countries are provided access to multiple money exchange companies from where they can remit directly in MCB Burqraftaar Remittance Account instantly. Also, the bank provides more than 100 dedicated remittance centers across the country where the beneficiaries can collect cash in person. Further, the account offers withholding tax exemptions on cash withdrawal, free debit card, insurance coverage to both the remitter and beneficiary.
- **MCB Asaan Remittance Account** is another initiative by the SBP under the financial inclusion program to provide secure home remittance inflows. The account is available in the Current variant only and is targeted towards unbanked/under-banked remittance beneficiaries of Pakistan, with simplified account opening requirements. This product not only increases the Bank's product portfolio but also fulfills its fiduciary responsibility of documenting the economy and inculcating a saving habit in its customers.
- **MCB E-Statements:** MCB Bank's E-Statement initiative adds an additional layer of convenience for our digital savvy customers. This service is free for all customers and provides easier access to banking information when needed without visiting the branch. This service also augments Bank efforts to reduce use of paper and facilitate Green Banking guidelines issued by SBP.

## MCB Privilege Banking

Privilege Banking takes pleasure in taking you on a journey of superior high-end customer services, a rewarding in branch experience, a wide array of financial services, investment opportunities and transactional convenience, via dedicated, contemporary and service-oriented sales force. These multi-dimensional banking relationships experience positions privilege segment customers at

unparalleled advantages that put them ahead of others. MCB Bank has eight dedicated Privilege Centers waiting to welcome you in Karachi, Lahore, Islamabad, Faisalabad, Rawalpindi and Multan with plans to expand to even more locations.

## MCB Agri Financing Products

Agriculture finance business of the Bank has embraced a new & progressive outlook as a result of various initiatives. The bank has strengthened its Agri. financing structure in terms of required delegation of approving authority and deployment of dedicated Human Resources at the branch level. A well-equipped, trained & experienced team of agriculture marketing officers has been put in place to facilitate farmers on their door steps, for completion of documents and revenue related formalities, along with providing them awareness on banking facilities, products and financial management.

The health and size of the Bank's Agri. portfolio is gradually expanding with a focus on encouraging mechanized farming. Moreover, insurance arrangements are in place to provide risk coverage to crops/tractors & equipment. Farmers are availing credit facilities to meet input needs for poultry, dairy and fish farms apart from crops. All credit proposals are processed as per standard guidelines of credit policy of the bank and approved on merit.

MCB Bank fully supports all Government and State Bank of Pakistan initiatives for promotion and steady flow of credit to the farmers. This lends support to the national cause of food security for the people of Pakistan and to exploit the potential of agriculture sector. Efforts are made to enhance outreach to growers through innovative lending including value chains and processing units. MCB Bank will continue to support agriculture sector as a matter of its policy by remaining an active partner supporting progressive farmers by providing credit for all types of farm and non-farm activities. The microcredit needs of small farmers are met through extending credit lines to NGOs/MFIs supported through digital services, thus serving the cause of financial inclusion.

The Agri. financing products offered cover requirements of both production and development needs of farm & non-farm activities. The farmers may need long term finance to undertake development projects or there may be working capital requirements. Long term financing needs are met through Term Finance whereas working capital requirements are met by production finance.

**Shadabi Plan:** Covers agriculture loan products for the production requirements of farm & non-farm activities of the farming community. Financing products extended under this category are Agriculture Running Finance-Revolving (ARF-R), Agriculture Production Finance (APF) and Agriculture Production Finance-Growers (APF-G). All

working capital needs of nonfarm are also covered under Shadabi Plan through APF/ARF.

**Khushali Plan:** Agri Development Finance (ADF) caters to the credit needs of farmers, generally long term, pertaining to the development projects related to both farm & non-farm sectors. Under Khushali Plan, different products are offered to cater to sector specific credit needs. The products offered are ADF (Tractor Finance), ADF (Aabiari Finance), ADF (Dairy & Meat finance), ADF (Murghbani Finance), ADF (Baghbani Finance), ADF (Mahigeri Finance) and ADF (Zari Technology Finance).

The amount of finance sanctioned depends upon the genuine credit requirement of the farmer and collateral. Non-farm credit (poultry, dairy[including value chains], fisheries, & others) and financing for land leveling/development, heavy equipment, agriculture machinery, vehicles/transport for Agriculture purpose are covered under this plan.

**High Efficiency Irrigation System (HEIS):** The Financing Product for "High Efficiency Irrigation System (HEIS)" facilitates farmers in availing the subsidy provided under the provincial government schemes aimed at conservation of water and avoiding wastage of the precious resource. Drip and sprinkler irrigation systems are referred to as High Efficiency Irrigation Systems, (HEIS) which enable timely application of water and other inputs i.e. fertilizers, nutrients etc. as per plant requirements at various stages of growth. The HEISs are versatile in their applicability and provide complete control in irrigation operations. HEISs can be practiced on a variety of soil conditions e.g. uneven topography, odd field configurations, rolling sandy areas, etc. and are best suited for variety of crops such as orchards, vegetables, cotton, maize, sugarcane, wheat, fodder, gram etc.

Governments of Punjab and Sindh are subsidizing these high efficiency irrigation systems to farmers by contributing 60% of the total project cost and remaining 40% cost sharing by the farmers. Under HEIS Financing, MCB will provide financing to the extent of 80% of farmer's share towards installation of HEIS. The purpose of HEIS financing scheme is to facilitate farmers in adoption of high efficiency irrigation system, which in turn would help them in efficient utilization of water & other resources to improve per acre yield. The solar/renewable energy requirements of farmers for agriculture purposes are also fully supported.

There may be other development projects proposed by the farmers falling within the ambit of agriculture financing. MCB Bank is fully committed to meet all type of genuine credit needs of the farmers as a strong financial institution, concerned for and aligned with, the national cause of supporting Agriculture Sector of Pakistan.

### **Digital Access to record of Punjab Land Record Authority (PLRA):**

MCB has signed a Service Level Agreement with Punjab Land Record Authority (PLRA) to provide online access to data for a defined scope of services under the SLA. Digital access is aimed at enabling the fast track provision of documents/information related to land record of farmers for quick decision making and sanctioning of financing facilities. The scope of services covers issuance of Fard, charge creation, and redemption. The branches are being equipped with necessary infrastructure/equipment in a phased manner for availability of online access to PLRA records. The initiative has been implemented and major Agri lending branches have started providing services to farmers. As a result of this initiative, the dream of a strong digitalized platform for dedicated support to farmers of Punjab Province for quick access to banking facilities is close to realization. MCB Bank is one of the leading banks which have started offering services to the farmers under the digitalized access to PLRA record.

### **Loan Origination System:**

MCB Bank has procured and implemented a Loan Origination System (LOS), a parameterized solution for efficient processing in order to automate the end-to-end credit approval process, optimize the loan processing activity and to gain efficiencies. LOS has been implemented for Agri Financing across the bank covering all Agri. Lending Branches. This has greatly helped in the fast processing and approval of farmers' requests for finance.

MCB is fully committed to support agriculture financing in line with SBP/Government policies and taking steps to enhance credit flow to the farming community through strengthening of internal systems and to ensure availability of required resources.

## **MCB Consumer Lending Products**

MCB Consumer Banking offers a full suite of consumer lending products to its valued customers. The Bank's current product portfolio consists of credit cards, auto loans, home loans, personal loans, secured personal loans, unsecured overdraft facility and student personal loan (for LUMS MBA and MPHIL ELM students). At MCB Bank, the ideology behind our innovative Consumer financing products focuses on meeting three of our client's objectives simultaneously, i.e. affordability, convenience and lifestyle. MCB Consumer Finance products enhance the overall life experience of our customers. MCB Bank works to collaborate with targeted brands and organizations to ensure that we provide premium value added services to our clients. MCB Consumer Banking is ably assisted by strong back office support which includes Operations, Service Quality, Internal Audit, Compliance and a Legal Team that work together to ensure that the Bank operates efficiently and in the best interest of its customers under the regulatory framework.

### **MCB Car4U**

The Bank's auto financing product, MCB Car4U, provides a one-stop financing solution to help our customers obtain the automobile of their dreams. Customers are free to choose between used and new vehicles, both locally manufactured and imported. MCB Car4U also allows customers to finance up to three cars simultaneously from MCB Bank in line with their unique needs and requirements. Both loan and lease variants are offered under Car4U financing. MCB Car4U offers auto loans to customers in 1,400+ of our branches across 85 cities. Both self-employed and salaried customers can apply for a MCB Car4U Loan with ease. The Bank offers a competitive markup rate to all customers and also offers a discounted markup rate to its existing Branch Customers. Over the years, the Bank has formed a strong network of auto-dealers, engaged in sale of both new/used and imported cars enabling us to facilitate our customers evolving needs. MCB Bank values its credible and expansive dealer network as one of the key pillars of its success in the auto finance business.

### **MCB Home Loan**

Owning a home is a dream for many. At MCB Bank, we aim to help our customers fulfill this lifelong ambition and turn their dream into reality. MCB Home Loans provides financing solutions for the purchase of a home as well as for a plot and construction thereon. MCB also offers a subsidized home loan product under Government's Markup Subsidy Scheme and Low Cost Housing Scheme for special segments. Customers also have an opportunity to transfer their existing loan from any other bank to MCB through a balance transfer facility. MCB Home Loan product also caters to housing needs of non-resident Pakistanis in Pakistan. MCB Home Loan product is now available across country through a network of branches supported by a team of skilled home finance specialists placed at multiple locations in the country.

### **MCB Credit Cards**

MCB Credit Cards are secured with Chip & PIN functionality and carry world class features that provide transactional & payment convenience to our customers across the globe. The instant SMS and E-Alert facility enables our customers to monitor their credit card transactions and be alert of potential misuse of their Credit Card. The cards are available in three different variants i.e. Classic, Gold and Platinum that cater to the diverse needs of our distinguished customers.

Besides transactional convenience, these cards also offer payment flexibility / financial convenience to the customer, such as 0% service fee on Installment Plans, the ability to transfer balances on a lower rate or even request for a Banker's Cheque in the customer's own name or direct credit in their own MCB account & accounts in other Banks.

Credit Card Bill payments are made more convenient for customers, who can now make their Credit Card bill payments through Cash, MCB Cheque, Cheques of other Banks, over the MCB Branch counters and MCB Contact Center. They can also make payments through MCB Bank and other Bank's Internet Banking, Mobile Banking & ATM services.

#### **MCB Personal Loan:**

MCB Personal Loan is a Fast, Affordable and Easy option to meet our customers' immediate financing needs. This is an unsecured product and does not require any security. This product is only available to salaried customers.

#### **MCB Wealth Management:**

MCB Bank is among the market leaders in providing Wealth Management Services to its customers. The business is constantly evolving and expanding its product suite for both Insurance and Investment products to cater to our clients' financial requirements. We are partners with some of the leading Insurance and Asset Management companies in Pakistan to deliver innovative solutions based on customer needs, future plans and risk appetite.

#### **MCB Bancassurance:**

MCB Bank strives to help the dreams of its customers come true. Your dreams may be to give your child the best education, live a dignified life after retirement or to keep your loved ones financially secure and protected.

MCB Bancassurance plans provide you with the underlying financial security you and your family deserve. We work with our insurance partners to understand your needs based on your stage in life and provide tailor-made plans which are affordable and realistic. In addition, you and your family enjoy the peace of mind which comes from being 'Har Pal Mehfooz' in case of any unforeseen eventuality. Together with our insurance partners, we have a wide range options available which ensure that you and your funds are in good hands. All plans are underwritten by leading insurance providers and all funds are managed by experts in the field to give you the optimal returns based on your risk preferences and stage of life. Combining the best of banking and financial solutions, MCB Bancassurance provides a one-stop solution for your convenience and security.

#### **MCB Investment Services:**

Investment Services operate with the aim to help you make the most of your wealth with investment opportunities that match your unique financial aspirations. MCB Investment Services offers mutual funds managed by leading fund managers of Pakistan. We can suggest products most suited for your needs, or work with you to create a personalized solution completely focused on your expectations of the capital markets. These products offer you financial liquidity with comfort and ease and assist you meet both short and long term investment needs.

## **MCB Digital Banking Products and Services**

#### **MCB Debit Card**

With global acceptance at more than 20 million merchants and 1.5 million ATMs worldwide; MCB Debit Cards is a way forward into the changing future of payments. MCB Bank is proud to have the latest dynamic Chip & PIN based Debit Cards which allow customers to have unmatched convenience, enhanced security and round-the-clock accessibility to their funds. MCB Debit Cards are accepted at 12,000+ ATMs and 45,000+ merchants nationwide, with promotional discount schemes designed to reward our users for shopping, dining, fuel, travel, health and much more. With an MCB Debit Card, one can forget the need to carry cash. The product proposition has been further enhanced with the launch of card variants like Visa Platinum, Gold, Gold Local and supplementary cards. MCB Debit card also offers multiple international and local payment scheme cards which include Visa, MasterCard and PayPak fulfilling various customer segment needs, MCB Bank is proud to be chosen as one of the main banks to provide services to overseas Pakistani through Roshan Digital Account (RDA). MCB has started issuance of debit cards to RDA account holders as well. MCB Bank is one of the handful of banks in Pakistan who have ventured to comply themselves with the PCI DSS which is considered to be the international benchmark for card data security thus improving the overall product value proposition.

#### **MCB ATMs**

MCB Bank has one of the largest ATM networks in the country with 1,400+ ATMs which includes 154 off-site ATMs placed at commercial locations like malls, workplaces and hospitals etc. The network covers 500+ cities across the country and is steadily growing. MCB Bank has one of the best ATM uptime availability across the industry, ensured by the presence of ATM monitoring teams working 24/7, periodic ATM health checks and hardware replacements. MCB ATMs provide our customer with convenience to withdraw cash, make utility bill payments, mobile top-ups, funds transfer through its countrywide network.

#### **MCB Mobile**

MCB Mobile is the Flagship application of MCB Banks' innovative digital services. MCB Mobile aims to provide the convenience of conducting financial and nonfinancial transactions with the safest and easiest steps. Now MCB accountholders can access mobile banking with their registered mobile number by downloading MCB Mobile application from the ANDROID or IOS store. MCB Mobile is providing its customers the user-friendly experience of conducting payments hassle-free.

#### **MCB Internet Banking**

MCB Internet Banking is a user-friendly and convenient online banking platform that provides secure financial and non-financial transactions for its customers. MCB Internet

Banking has enabled the bank to deepen its Digital Banking footprint while allowing its users to make 24/7 payments and transactions.

### MCB Lite

MCB Bank received its branchless banking license 8 years ago, and formally started its branchless journey with the launch of MCB Lite in 2014. MCB Lite mobile wallet allows customers to handle their daily transactions and payments in an efficient and real time manner from one's mobile phone. Wallet can be linked with any Lite debit card (local or international payment scheme) for local, international and E-commerce use. Moreover, to support foreign remittances, the enablement of Lite Remit feature has allowed customers to receive money directly into their Lite mobile wallet from anywhere in the world. MCB Lite is all set to explore new fronts and expand its overall footprint across the branchless banking arena.

### MCB Card Discounts

Caring for and giving back to our esteemed customers is what MCB Card Discounts is all about. MCB Bank is proud to have the best discount offers for our prized MCB (Debit, Credit, Prepaid and Lite) cardholders. MCB offers a wide variety of discounts across all top retail merchants and brands ranging from dining, shopping and lodging. MCB Bank's motto i.e. 'Bank for Life' is truly personified through our MCB Card Discounts program. The year 2020 saw the bank partnering with around 30 top of the line discount partners for multiple strategic and long term discount deals.

### MCB Alerts

MCB Bank is proud to offer its valued customers with alerts services that comprise of SMS alerts. This service allows customers to keep track of all of their banking transactions through SMS notifications. By applying to this service, customers receive real time updates whenever they conduct a transaction on any of their MCB bank accounts. It is a great way of staying updated about transactions conducted on one's account(s).

### Card Acquiring (POS)

MCB Bank has a network of approximately 3,000 POS terminals deployed at key merchant locations across Pakistan. Our Point of Sale (POS) network is fully EMV compliant and accepts Visa, MasterCard, UPI, JCB and Pay-Pak card transactions from all over the world. MCB's POS Acquiring business continues to grow due to deepening of merchant relationships, round the clock support, increased POS productivity and quality of deployments.

### Internet Acquiring (MCB eGate)

MCB e-Gate is a world-class online payment gateway service, formed as a result of MCB's partnership with MasterCard International. MCB e-Gate equips online businesses to accept payments reliably and securely from both credit as well as debit cards and currently facilitates

more than 600+ online merchants, directly and indirectly. The online card acquisition footprint has grown and continues to grow substantially worldwide and MCB Bank is playing an integral part in developing the e-commerce market in the country. Further, to improve online shopping and merchant experience for e-commerce, MCB e-Gate payment system has now been upgraded from Mastercard Internet Gateway Service (MIGS) to Mastercard Payment Gateway Services (MPGS) which is fast, reliable and supports multiple payment modes. It also comes with the range of other value added features including Real time fraud prevention and supports Mobile Commerce.

### MCB Contact Center

The human voice is still valued as the most trusted and relevant form of communication medium by a majority of our clients. This has inspired us to constantly improve our service and upgrade our MCB Contact Center to the world's best Platform. This proactive upgrade has enabled us to enhance service delivery across multiple channels while allowing us to address specific needs of our esteemed customers. MCB Contact Center is equipped with 200+ trained professionals who offer a wide array of financial and non-financial services in multiple regional languages around the clock. The customers are further facilitated through self-services modes like Interactive Voice Response (IVR), Self Service Channel and Live Chat for RDA customers. The Contact Center not only serves MCB Bank's customers but also cross-sells and up-sells a number of products and services as well.

### WBG Products and Services

MCB Bank's Home Remittance brand, MCB Burqraftaar was amongst the largest remittance payout brands in Pakistan in 2020. Our contribution through MCB Burqraftaar is not only limited to the bank's growth but we are also proud to be one of the biggest contributors to the national interest of the country by promoting remittances through legal channels. MCB has managed to build an extensive network of partners across the globe to ensure overseas Pakistanis can send money to their families back home.

- **MCB Burqraftaar Cash (Cash in Hand)** is available via MCB's entire branch network. Payments can be made from any of MCB's 1,400+ branches to walk-in customers.
- **MCB Burqraftaar Transfer (Straight to Account)** enables overseas Pakistanis to send their remittances to their loved ones in Pakistan through our hassle-free straight to account credit service.
- **MCB Lite Remit** allows beneficiaries to receive money from their loved ones directly into their Mobile Wallet, from our global network of remittance partners. Money can be conveniently withdrawn from MCB Lite Card through MCB branches, MCB ATMs, 1Link ATMs, or



use the funds through the MCB Lite mobile App and POS terminals.

- **MCB Asaan Remittance Account** is targeted towards unbanked / under-banked Remittance Beneficiaries of Pakistan with simplified/relaxed account opening requirements and procedures.
- **MCB Burqraftaar Remittance Account** is targeted towards inward Remittance Beneficiaries in Pakistan with a unique feature of exemption on withholding tax on all cash withdrawal transactions of any amount via cheques from all MCB Bank branches & country-wide ATMs.

MCB Home Remittance is continuously working to design new products and facilities for the ease and convenience of remitters and beneficiaries.

**MCB Transaction Banking:** Transaction Banking (TBD) provides a wide range of value-added collection and payment services to large corporations through the Bank's vast network of real-time branches. TBD provides structured and customized collection products enabling customers to realize their sales proceeds swiftly from across the country, supported by real-time MIS reports.

#### Corporate Collection and Payment

- **CollectPlus:** Collection through a deposit of cash, same branch and local clearing instruments in designated MCB Branches
- **RemitPlus:** Collection through a confirmed and secured receipt, without the involvement of the clearing process
- **SIDA:** Collection through direct debit of dealer's account maintained at the branch.
- **DebitPlus:** Collection through direct debit of dealer's account maintained at the branch by TBD via a one-time instruction from the dealer/distributor and email instruction from the customer.
- **PayPlus:** Payment by IFT/IBFT/Bankers cheques/RTGS by emailing the relevant file/instructions to TBD
- **TBD - FI Cash Management:** We offer unique cash management solutions to our local Correspondent Banks and Non-Bank Financial Institutions to meet their particular requirements for fund collection, payment, reconciliation, and reporting.
- **Online Fund Transfer (OFT):** This web-based electronic fund transfer facility has been designed to enable a large network of franchises/dealers/distributors to conduct real-time branchless transactions through a secured MCB website.
- **Dividend Warrant Management:** The Bank provides a complete and comprehensive dividend solution to customers through Electronic Transfers to Shareholders Accounts & processing of Warrants through MCB branches, followed by complete reconciliation. Foreign dividends are also managed end to end by TBD.

- **Sub Clearing Arrangement:** Microfinance banks that do not have operating licenses for clearing can now rely on MCB to act as their sub-clearing agent for processing transactions through NIFT.
- **Payment Station:** Corporate Payment Station "Pay Direct" offers a real-time comprehensive payment and transfer mechanism for corporate and large business entities. This allows our customers to virtually execute A2A, Cash Payments, Bankers Cheque, IBFT, RTGS, and Report Printing.

Our Corporate Banking team works in conjunction with Transaction Banking to facilitate customer requirements for collections, payments, dealer finance, electronic dividends, and bulk salary processing.

- **Corporate IVR for Collections:** MCB introduced a new platform for Dealers, Distributors, and Franchisees to conduct transactions without the need to visit MCB branches, by using our existing CRM and IVR channel. The product provides security in terms of cash-carrying and also allows the dealers/distributors to conduct transactions even after banking hours i.e. 24/7.
- **Tax & Duties Payments to FBR:** MCB Customers can pay their FBR Tax and Duties securely and conveniently through MCB Transaction Banking "Over-the-Counter" at any MCB branch as well as through "TBD PayPlus" by sending us their tax payment details on a secured file. Our Corporate customers can also pay their taxes and duties through "TBD-PayDirect" 24x7 and from anywhere in the world. Under FBR payments, MCB offers real-time integration with 1-Link and CBS with complete security and a two-step authorization process. Complete transaction details are ensured through computer-processed receipt, instant SMS alert, and detailed MIS for the branch / back office.

#### Banker to the Issue for IPO/SPO's & Right Shares:

We provide efficient & effective processing for both IPO/SPOs & Right Share Mandates. Our branches are well-trained in handling collections for both these products. The information mentioned in the forms is matched with funds collected and after reconciliation, these are transferred to the respective company. MCB's TBD team works jointly with Investment Banking Team on various IPO/SPO's & Rights Shares to facilitate clients.

**MCB Corporate Banking Finance:** MCB's Corporate Banking Finance is equipped with a professional and devoted relationship management team having a presence in 5 cities (namely Karachi, Multan, Faisalabad, Lahore, and Islamabad) across Pakistan is providing structured financial services through dedicated Corporate Centers/Branches.

The corporate Team operates in 3-dimensional approaches within the defined goals of the organization.

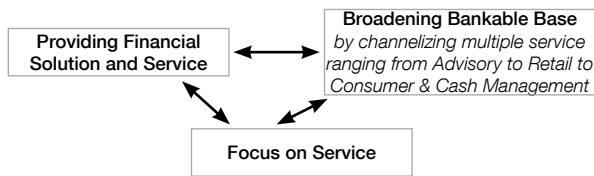

- Financial Services and Solutions:** MCB Corporate Banking provides access to diversified financing options, including working capital loans, term loans, trade based finance services (bank guarantees, Import Letter of Credits, import and export services, bill discounting / negotiation, Export finance both in USD and PKR, State Bank of Pakistan export refinance and Long Term Finance, Import finance both in USD and PKR), dollar-based loans, financing under SBP schemes and depository options are also offered under various schemes.
- Broadening Bankable Base:** Our Corporate Banking team works in close liaison with our Investment Banking team to facilitate clients with advisory and arrangement services for equity, debt and project finance offered through our Investment Banking Division. Similarly, our Corporate Banking team works in conjunction with Transaction Banking, Retail, and Consumer Team to facilitate their requirements for collections, payments, dealer finance, electronic dividends, bulk salary processing, and various consumer-related products for their employees and shareholders.
- Focus on Service:** Dedicated Corporate Branches are available in 5 cities Karachi, Multan, Faisalabad, Lahore, and Islamabad to cater business needs of corporate relationships through the support of the Corporate Relationship Management Team.

**MCB Investment Banking:** MCB Investment Banking offers a full suite of Investment Banking services ranging from equity & advisory, syndications and debt capital markets to Project and structured finance. MCB Investment Banking works in close coordination with Corporate and Retail Banking to facilitate their clients with its services.

**MCB Project and Structured Finance:** MCB Project and Structured Finance is a 'Non-recourse' or 'Limited Recourse' financing, where the lenders base their credit decision primarily on the cash flows of the project, concerning repayment of the project debts. Risks are carefully allocated amongst various stakeholders.

**MCB Syndicated Loans and Debt Capital Markets:** MCB Syndicated Loans and Debt Capital Markets involve arrangement, underwriting and placement services for debt financing requirements by large corporate and institutional clients to other financial institutions or through the debt capital markets.

**MCB Quasi Equity / Hybrid Instruments:** MCB Quasi Equity/Hybrid Instruments are structured and tailor-made products incorporating specific customer requirements based on debt and/or equity components including unsecured nature instruments, subordinated nature types, cumulative/noncumulative dividend payments types, equity play component instruments, etc.

**MCB Equity Capital Raising:** MCB Equity Capital Raising relates to raising capital for our clients by offering common or preferred equity to the public or private investors, through initial public offers, offers for sale, rights issues and private equity placements and underwriting of equity issues in the Capital Market.

**MCB Advisory Services:** Financial and Capital Raising Advisory provides our clients with financial advisory services for mergers and acquisitions, privatization, project finance, commercial structuring support and access to capital resources to assist companies successfully finance their business/project.

## MCB Trade Products

Trade Products provide a wide range of standard as well as tailor-made products and solutions to trade customers from all walks of life. Despite having an inventory of standard to market products in refined shape, specific new-to-market products include:

- Quick-LC:** A simple and easy to use mechanism, internal design of desktop application, allowing customers to type-in, e-mail and print out an LC application form, reducing cost and hassle while improving TAT and input accuracy.
- X-Flex:** A solution which facilitates external export business for customers in cases where transport documents (Bill of Lading) are not available at the counters of MCB's discounting / financing branch on the date of extending financing.
- TRIMS:** Facilitates the financing of inland trade through the involvement of MCB Bank at both ends thereby allowing an exporter to get receivables discounted on non-recourse basis, i.e. the exporter receives payment in a given time (in less than 48 hours) after performing obligations.
- Econ-LC:** A product program which allows drafts/bills of exchange to be waived as a requirement under LCs available by negotiation resulting in reduction in overall transaction cost for importers.
- Avalization (Export):** A global product designed to facilitate the financing of export by allowing an Exporter (Seller) to discount the receivables under credit granted to a counter party, i.e. Importer (Buyer), without taking payment risk on the Importer (Buyer) under a contract (non-LC transactions).

- **Avalization (Import):** A product which facilitates delivery of import documents (and goods) against importer's acceptance under contracts (without opening of LC) hence offers savings associated with fees and commissions.
- **China LC Confirmation Programme:** Under this program the branches of MCB's partner bank located in Hong Kong and China add "Confirmation" to MCB LCs on "Free of Cost" basis thus increasing acceptability of MCB's Import LCs and facilitate import customers.
- **Europe LC Routing Program:** Under this program the branches of MCB's partner bank located in UK will be handling LC transaction originated by MCB under special arrangements which includes advising, confirmations, bill discounting and UPAS transactions.

## MCB Sri Lanka - Products and Services

### **Current Account - Take account of things that matter!**

MCB Bank Current account allows our customers to distinguish themselves in the financial market with a secure and faster cheque clearing process, allowing them to carry out their transactions with a greater level of confidence.

### **Privilege Current Account – Feel prioritized and privileged!**

MCB Bank Privilege Current Account offers a range of personal and business banking solutions that are specially tailored to meet our customers' emerging needs, with a whole array of value additions coupled with our unparalleled customer services.

### **Savings Account - The smarter your savings, the higher your returns!**

MCB Savings Account is designed to encourage customers to maintain a healthy account balance, which keeps growing day by day. Tier based interest rates enable customers to enjoy an attractive return on their funds. Customers have the freedom to utilize their funds to meet their day to day financial needs with no restrictions to the number of transactions they perform.

### **Fixed Deposits -The safe way to save!**

Fixed Deposit Accounts are designed to suit the diversified investment requirements of our customers. Starting from 7 Days Call Deposits, our product range extends to Term Deposits that can be fixed up to 4 Years. Further, we offer the option of obtaining the interest at maturity or specific interim periods (monthly/quarterly) depending on the customer's requirement for funds.

### **MCB Kidz Club - Pave the future for your child!**

Children are the wealth of our nation. We offer ample encouragement and incentives to assure them of a secure future. MCB Kidz Club Account offers an attractive interest rate coupled with a wonderful gift scheme based on the account balance. This encourages parents and children

to grow their account balance to enjoy the financial return, as well as to collect gift items on reaching specific account balances.

### **Foreign Currency Accounts - When you need financial diversity!**

MCB customers can save in any designated foreign currency and enjoy attractive returns. Further, we offer a wide range of account types for personal and business clients under special schemes approved by the Department of Foreign Exchange of the Central Bank of Sri Lanka.

### **MCB Debit Card – Introducing more convenience!**

MCB Bank has been providing financial services to its valued customers since 1994. To further enhance this relationship, MCB signed up with the partnership of Lanka Pay and JCB for the introduction of Debit Card, providing our valuable customers the facility to shop with convenience. Debit Card also provides access to customer accounts through a shared network of over 4,500 ATMs Island wide.

### **Virtual Banking – Smart & secure access 24/7!**

Virtual Banking helps customers stay updated on their account activities from wherever they are, and carry out their banking transactions at a time that is convenient for them, instead of restricting themselves to standard banking hours.

### **Safe Deposit Lockers - Where safety is a promise!**

We pride ourselves in offering our customers ease of mind and this is yet another service that highlights our commitment to providing everything necessary to accommodate their needs. We offer various types of lockers depending on customer requirements to protect their documents, jewelry, or any other valuables.

### **Home Remittance – Transferring happiness to your Homeland!**

MCB Home Remittance is a simple and dependable way of sending money to your loved ones in Sri Lanka from anywhere in the world. With a wide network of worldwide remittance partners (including the partners of MCB Bank Pakistan), we ensure the fastest and safest money transfer.

### **Trade Services – Trading becomes convenient & faster!**

MCB Trade Services empower individuals and businesses to reach their highest potential by streamlining and customizing processes and product portfolio. We ensure that a comprehensive range of trade products and services will enable you to do your business successfully. A new product "Avalization Imports" was launched in 2020 facilitating trade transactions under Collection terms.

### **SME & Corporate Banking**

We offer diversified finance options for Small/Medium Entrepreneurs and Corporate customers to achieve success in their business. These financing options range from Overdrafts, Leasing for vehicle and machinery,

Working Capital Loans, Term Loans, Trade Finance, and Structured Project Financing to cater to the evolving needs of our Business Banking customers. A wide range of Treasury products including Forward Contracts, Repurchase Agreements, Spot Contracts, and Treasury Bills are also offered under investment options.

## UAE - Products and Services

MCB UAE has an array of customized business products for its wholesale customers that include Business Accounts, Finance & Trade products. These services are aimed at fulfilling the day to day needs of the businesses at competitive yet flexible prices.

### Avalization

The "Avalization (Export)" Product has been designed to facilitate the financing of exports by allowing an Exporter (Seller) to discount its receivables under credit granted to a counterparty i.e. Importer (Buyer), without taking payment risk on the Importer (Buyer); through the involvement of banks at both ends, the Exporter (Seller) receives its payment a few days after performing its obligations under a contract (and not under a letter of credit) entered into with the Importer (Buyer) instead of waiting for the full tenor of the credit period granted to the Importer (Buyer). The receivables are secured by a bill of exchange or promissory note accepted by the obligor (the person who is liable for the payment of the receivable). By way of credit enhancement, these receivables are further backed by the guarantee or commitment of the obligor's bank who becomes the end Obligor.

### MCB Current Deposit Account

It is designed to provide our wholesale customers with transactional convenience and flexibility. Choices of local (AED) and International currencies (USD/GBP/EUR) are available at attractive options for our business customers with a low minimum balance.

### 365 Savings Business Gold Account

Transactional flexibility in a Savings account, 365 days Gold Account provides the choice of local (AED) and International currencies (USD/GBP/EUR). This account will grow savings at an attractive interest rate for 365 days while giving the flexibility to use these funds for business transactional needs as well. An attractive option for business customers with a high balance and with requirements of transactional flexibility.

### Term Deposit

Term Deposit products are available in a choice of local (AED) and International currencies (USD/GBP/EUR). Tenor options can be chosen between 1, 3, 6, and 12 months. It is an attractive option for our business customers with short to mid-term investment opportunities.

### Demand Finance

It is financing for a fixed period repayable either in periodic installments or in a lump sum, at a future date. An attractive

option for business customers that require financing against fixed assets such as Plant and Machinery, Land, Building, etc.

### Overdraft

Overdraft facility allows businesses to access additional funds for day to day business expenses. The overdraft facility will charge interest only on the daily outstanding balance from the Current Account above the credit amount available.

### Bills Discounting

Our discounting solution is for clients who are looking to fund their working capital requirements. While discounting, the bank buys the bill (i.e. bill of exchange or promissory note) before it is due. The transaction is practically an advance against the security of the bill and the discount represents the interest on the bill from the date of purchase of the bill until it is due for payment.

### Post-dated Cheque Discount Facility

Cheque Purchase Discount Facility from MCB Bank takes away the hassle of waiting for post-dated cheques (30-120 days) to clear while letting businesses concentrate on completing their transactions.

### Finance against Trust Receipts (FATR)

Financing against Trust Receipts enables our customers to honor payments to their suppliers by letting the bank pay on their behalf without reducing customer's credibility. The customer simply has to submit a Trust Receipt (TR) Letter which contains a statement of receiving goods on the Bank's behalf and promising to pay the Bank on a deferred basis.

### Financing against Receivables

Financing against Receivables is available in the form of Invoice discounting. Invoice Discounting is a form of asset-based finance that enables a business with evidence to release cash tied up in an invoice to its debtors/buyers.

- **Discounting of Export Bills for Collection** – A borrowing mechanism available to raise finances for an agreed specific tenor. Where the bank buys the export bill at a discounted price, the exporter gets the amount from the bank while submitting export documents.
- **Discounting of Bills under Export LC** - A borrowing mechanism available to raise finances against documents drawn on buyers for an agreed specific tenor. Discounting of Bills under Export LC is available for customers who wish to sell such bills to the bank at a discount rate under the condition of not claiming anything from customers (Without Recourse).

### Guarantees

The Bank stands as a guarantor for its client ensuring that the liabilities of a debtor will be met. Generally, a Guarantee is issued on cash collateral or against some security as collateral.

### Letter of Credits

A bank guaranteeing on behalf of its customer that a buyer's payment to a seller will be received on time and for the correct amount. Generally, a Letter of Credit is issued for Sight and Usance terms against some security/collateral.

### Internet Banking

MCB Bank has implemented Oracle's Flex Cube Direct Banking which comes with enhanced securities, a user-friendly interface, and a host of functionalities/services. Our state of the art Internet Banking allows clients, through a maker checker concept, the convenience of conducting Inter-Bank Funds Transfer as well as Cross Border Funds Transfer at anytime from anywhere in the world simply by logging on to [www.online.mcbae.com](http://www.online.mcbae.com)

### Wages Protected System

MCB Bank has offered Wages Protected system (WPS) in MCB UAE, that enables our customers to route their salary transactions for their employees by using MCB's services.

## Bahrain – Products and Services

MCB-Bahrain offers the following Products and services to its clients:

### MCB Current Account

MCB Bahrain's current account is structured to provide our customers with transactional convenience and flexibility. Accounts are opened in international currencies (USD/GBP/EUR) with a low minimum balance.

### MCB Savings Account

MCB Bahrain offers saving accounts in International currencies (USD/GBP/EUR) to customers. It offers an attractive interest rate on deposits while giving them the flexibility to use the funds for transactional needs. An attractive option for customers with a high balance and require transactional flexibility.

### Term Deposit

Term Deposits are available in international currencies (USD/GBP/EUR). Customers can choose tenor based on their needs. It is an attractive option for customers with short to mid-term investment opportunities.

### Syndicated Transactions

MCB Bahrain can participate in both Islamic and conventional syndicated transactions. The branch participates in various regional transactions for corporates, financial institutions, and sovereign entities. Moreover, the bank is engaged in risk-sharing transactions with other reputed banks in the region for confirmation/discounting of trade instruments.

### Loans and Advances

MCB-Bahrain provides loans and trade facilities to its bilateral clients. MCB Bahrain financed for short term or long term funded facilities to its clients. Also, the branch can structure project-specific financing for its clients in the region.

### Trade Finance

MCB-Bahrain provides all types of funded & non-funded trade finance facilities to its clients including all types of letters of Credits, advising, confirmation, discounting of credit, documentary collection, bill discounting, and issuance of bank guarantees.

### Treasury

MCB Bahrain has been an active treasury that has been investing in various fixed income securities. The branch can invest in both Islamic and conventional instruments. Our portfolio in different points in time traded sovereign euro bonds, International Sukuk and Treasury bills. Bahrain branch can provide plain-vanilla FX solutions to its trade clients. Quote for other liquidity instruments such as SWAPS, short term borrowing/placements, and forwards can be inquired from the treasury front office.

## MCB Islamic Bank Limited

### Products and Services:

MCB Islamic Bank Ltd. offers a wide array of Halal and RIBA free Islamic Banking products and services to meet the requirements of individuals and businesses alike.

### Deposit Products:

MCB Islamic Bank offers a wide variety of Saving, Current and Term Deposit accounts such as the following:

| Current                                      | Saving                                    | Term Deposits                                 |
|----------------------------------------------|-------------------------------------------|-----------------------------------------------|
| MIB Hidayat Current Account                  | MIB Imaan Saving Account                  | MIB Na'mat Term Deposit                       |
| MIB Basic Banking Account                    | MIB Barkat Saving Account                 | MIB Na'mat Plus Term Deposit                  |
| MIB Asaan Current Account                    | MIB Barkat Saving Plus Account            | MIB Na'mat Premium Plus Term Deposit          |
| MIB Hidayat Foreign Currency Current Account | MIB Barkat Saving Premium Account         | MIB Aasoodgi Term Deposit                     |
|                                              | MIB Barkat Super Saving Account           | MIB Financial Institutions Term Deposit       |
|                                              | MIB Asaan Saving Account                  | MIB Na'mat Plus Foreign Currency Term Deposit |
|                                              | MIB Atfaal Saving Account                 |                                               |
|                                              | MIB Imaan Foreign Currency Saving Account |                                               |

### Digital Banking:

In order to meet growing needs of customers, MCB Islamic Bank offers the following Digital Banking products and services:

|                                |                   |
|--------------------------------|-------------------|
| MIB Qadar Cards                | MIB Phone Banking |
| MIB Internet Banking           | MIB Mobile App    |
| SMS Notification Service       | MIB ATMs network  |
| MIB Corporate Internet Banking |                   |

### Consumer Finance:

MCB Islamic Bank offers Halal and RIBA Free Housing Finance (Rihayesh Finance) & Car Finance (MiCar) products to provide Shari'ah compliant housing and vehicle financing solutions to Individuals.

In order to enable middle and low-income segments of the population to meet their housing needs, MCB Islamic Bank Limited is also offering Shari'ah compliant low and medium cost housing finance options to our customers at affordable rates under State Bank of Pakistan's Profit Rate Subsidy Scheme for Housing Finance 'Mera Pakistan – Mera Ghar'.

### Microfinance:

For fulfilling the needs of growing small / micro businesses in both Urban and Rural areas of Pakistan, MCB Islamic Bank Limited offers Murabaha Microfinance (Sharai Karobar) for men and women operating small businesses in diverse sectors. Through this financing facility, they can avail financing of up to PKR 500,000.

### SME Banking:

MCB Islamic Bank offers Shari'ah Compliant financing solutions for Small and Medium sized enterprises. These products have been designed to cater to the specific needs of SME industry. These products include Murabaha, Musawamah, Ijarah, Diminishing Musharakah, Istisna, Finished Goods Financing, and Commodity Salam.

MCB Islamic Bank offers following SME Banking services:

- Short Term / Working Capital Financing
- Medium / Long Term Financing
- Trade Finance
- Bank Guarantee
- Risk participation arrangement with financial partners
- SBP refinance schemes
- 'Prime Minister's Kamyab Jawan Youth Entrepreneurship Scheme' to enable youth to avail affordable financing for establishing new business or strengthening an existing one
- Awareness sessions for SME Customers on financial and non-financial advisory services with SMEDA, Chamber of commerce, and trade associations.

### Commercial Banking:

Commercial Financing segment focuses on building strong and long-lasting relationships with the Bank's customers by delivering satisfactory Shari'ah compliant solutions. To deliver excellent services, commercial financing segment facilitates its valued customers by synergizing its specialized team's effort with bank's outreach across the country for increased product servicing range for branch customers.

Commercial financing business offers following range of products to customers:

- Trade based financing (funded & non-funded).
- Cash Management & Remittance services.
- SBP's Refinance schemes.
- Working Capital financing
- Medium & Long term financing.
- Letter of Guarantees.

### Corporate Banking:

MCB Islamic Bank Corporate Banking team is focused on providing a range of diverse financial services (including tailor made solutions) to corporate clients (including multinational and public entities) by partnering with them and building long-term sustainable relationships.

Our dedicated teams within Corporate Banking are situated in offices located in Karachi, Lahore, Islamabad, Multan and Faisalabad. Our in-house expertise of product specialists and Shari'ah scholars are well versed in providing Shari'ah-compliant financing solutions to meet our customer's financing, trade, foreign exchange, investment banking and various other business requirements in a hassle free, effective and efficient manner across a diverse range of industries.

Our Corporate Banking relationship teams in liaison with Product Management & Shari'ah Structuring, Treasury, Cash Management, Trade, Investment Banking and Consumer Banking departments develop and deliver offerings that are used across diverse businesses.

MCB Islamic Bank offers a complete range / array of Shari'ah compliant products for both Corporate and Commercial banking sectors which can be classified as follow:

#### • Working Capital Finance

A complete product suite for extending Shari'ah Compliant products for working Capital Finance including Murabaha, Musawamah, Istisna, Commodity Salam, Finished Goods Financing and Musharakah Running Finance for catering to balance sheet (working capital) needs of Corporates / Commercial / MNCs for managing their day-to-day funding needs.

- **Medium & Long-Term Finance**

For catering to Balance Sheet requirements under long-term financing, MCB Islamic Bank has an array of medium to long term financing products which include Ijarah and Diminishing Musharakah.

- **Trade Services**

MCB Islamic Bank also offers a range of import and export services to effectively manage local and global supply chain needs of our customers, which provides them a competitive edge. These facilities extend for both raw materials and fixed assets. Services that are offered under the umbrella of Trade Finance includes:

- o Export Services
- o Bills for Collection under Export
- o Letter of Credit Advising & Confirmation services
- o Currency Salam (Shari'ah compliant alternate for Export Bill Discounting)
- o Pre-Shipment and Post-Shipment financing on Islamic modes of financing
- o Import Services
- o Letter of Credit
- o Import Financing
- o Bank Guarantees

- **SBP Financing / Refinancing Schemes:**

State Bank of Pakistan (SBP) offers various Financing / Refinancing facilities to support industrial growth and exports with the aim to promote the overall economic development of the country. These schemes provide financing to targeted industries at subsidized rates for increasing their production capacity and meeting their working capital requirements. Moreover, SBP also introduced certain schemes to support the industry with regards to the challenges being faced in post-pandemic scenario. Accordingly, the Schemes available through MCB Islamic Bank are:

- Islamic Export Refinance Scheme (IERS)
- Islamic Long Term Financing Facility (ILTFF)
- Islamic Refinance Scheme for Working Capital Financing of Small Enterprises and Low-End Medium Enterprises (IWCF)
- Islamic Financing Facility for Storage of Agricultural Produce (IFFSAP)
- Islamic Refinance Facility for Modernization of SMEs (IRFMS)
- Islamic Financing Facility for Renewable Energy (IFRE)
- Islamic Temporary Economic Refinance Facility (ITERF)
- Islamic Refinance Facility for Combating COVID-19 (IRFCC)
- Islamic Refinance Scheme for Payment of Wages and Salaries

- **Cash Management Services:**

MCB Islamic Bank has a significantly enhanced capability of receiving collections on behalf of Bank's customers, whereby we can support diverse requirements of our clients for receiving payments from their payers throughout the bank's branch network. This product encompasses the entire paper-based accounts receivable function.

- **Other Services:**

MCB Islamic Bank Ltd. also offers various services to meet growing needs of its customers, some of which are as follows:

- Remittance Service
- Forex Services
- PRISM Services

# Corporate Information

## Board of Directors

|                                          |                 |
|------------------------------------------|-----------------|
| Mian Mohammad Mansha                     | Chairman        |
| Mr. S. M. Muneer                         | Vice-Chairman   |
| Mr. Muhammad Tariq Rafi                  | Director        |
| Mian Umer Mansha                         | Director        |
| Mrs. Iqraa Hassan Mansha                 | Director        |
| Mr. Muhammad Ali Zeb                     | Director        |
| Mr. Mohd Suhail Amar Suresh bin Abdullah | Director        |
| Mr. Yahya Saleem                         | Director        |
| Mr. Salman Khalid Butt                   | Director        |
| Mr. Masood Ahmed Puri                    | Director        |
| Mr. Shahzad Hussain                      | Director        |
| Mr. Shariffuddin Bin Khalid              | Director        |
| Mr. Imran Maqbool                        | President & CEO |

## Audit Committee:

|                             |          |
|-----------------------------|----------|
| Mr. Shahzad Hussain         | Chairman |
| Mian Umer Mansha            | Member   |
| Mr. Muhammad Ali Zeb        | Member   |
| Mr. Shariffuddin Bin Khalid | Member   |

## Chief Financial Officer:

Mr. Hammad Khalid

## Company Secretary:

Mr. Fida Ali Mirza

## Auditors:

M/s. KPMG Taseer Hadi & Co.  
Chartered Accountants

## Legal Advisors:

M/s. Khalid Anwer & Co.  
Advocates & Legal Consultants

## Registered /Principal Office:

MCB Building, 15-Main Gulberg,  
Jail Road, Lahore, Pakistan.

## Contact us:

UAN: + 92 42 111 000 622  
E-mail: [investor.relations@mcb.com.pk](mailto:investor.relations@mcb.com.pk)  
Visit us: [www.mcb.com.pk](http://www.mcb.com.pk)

## Registrar's and Share Registration Office(s):

### Head Office:

M/s. THK Associates (Pvt.) Limited  
Plot No. 32-C, Jami Commercial Street 2,  
D.H.A., Phase VII, Karachi, Pakistan.

### Branch Office:

M/s. THK Associates (Pvt.) Limited  
Siddique Trade Centre,  
Office No. PL-29, PL Floor,  
72 Main Boulevard Gulberg -2,  
Lahore, Pakistan.



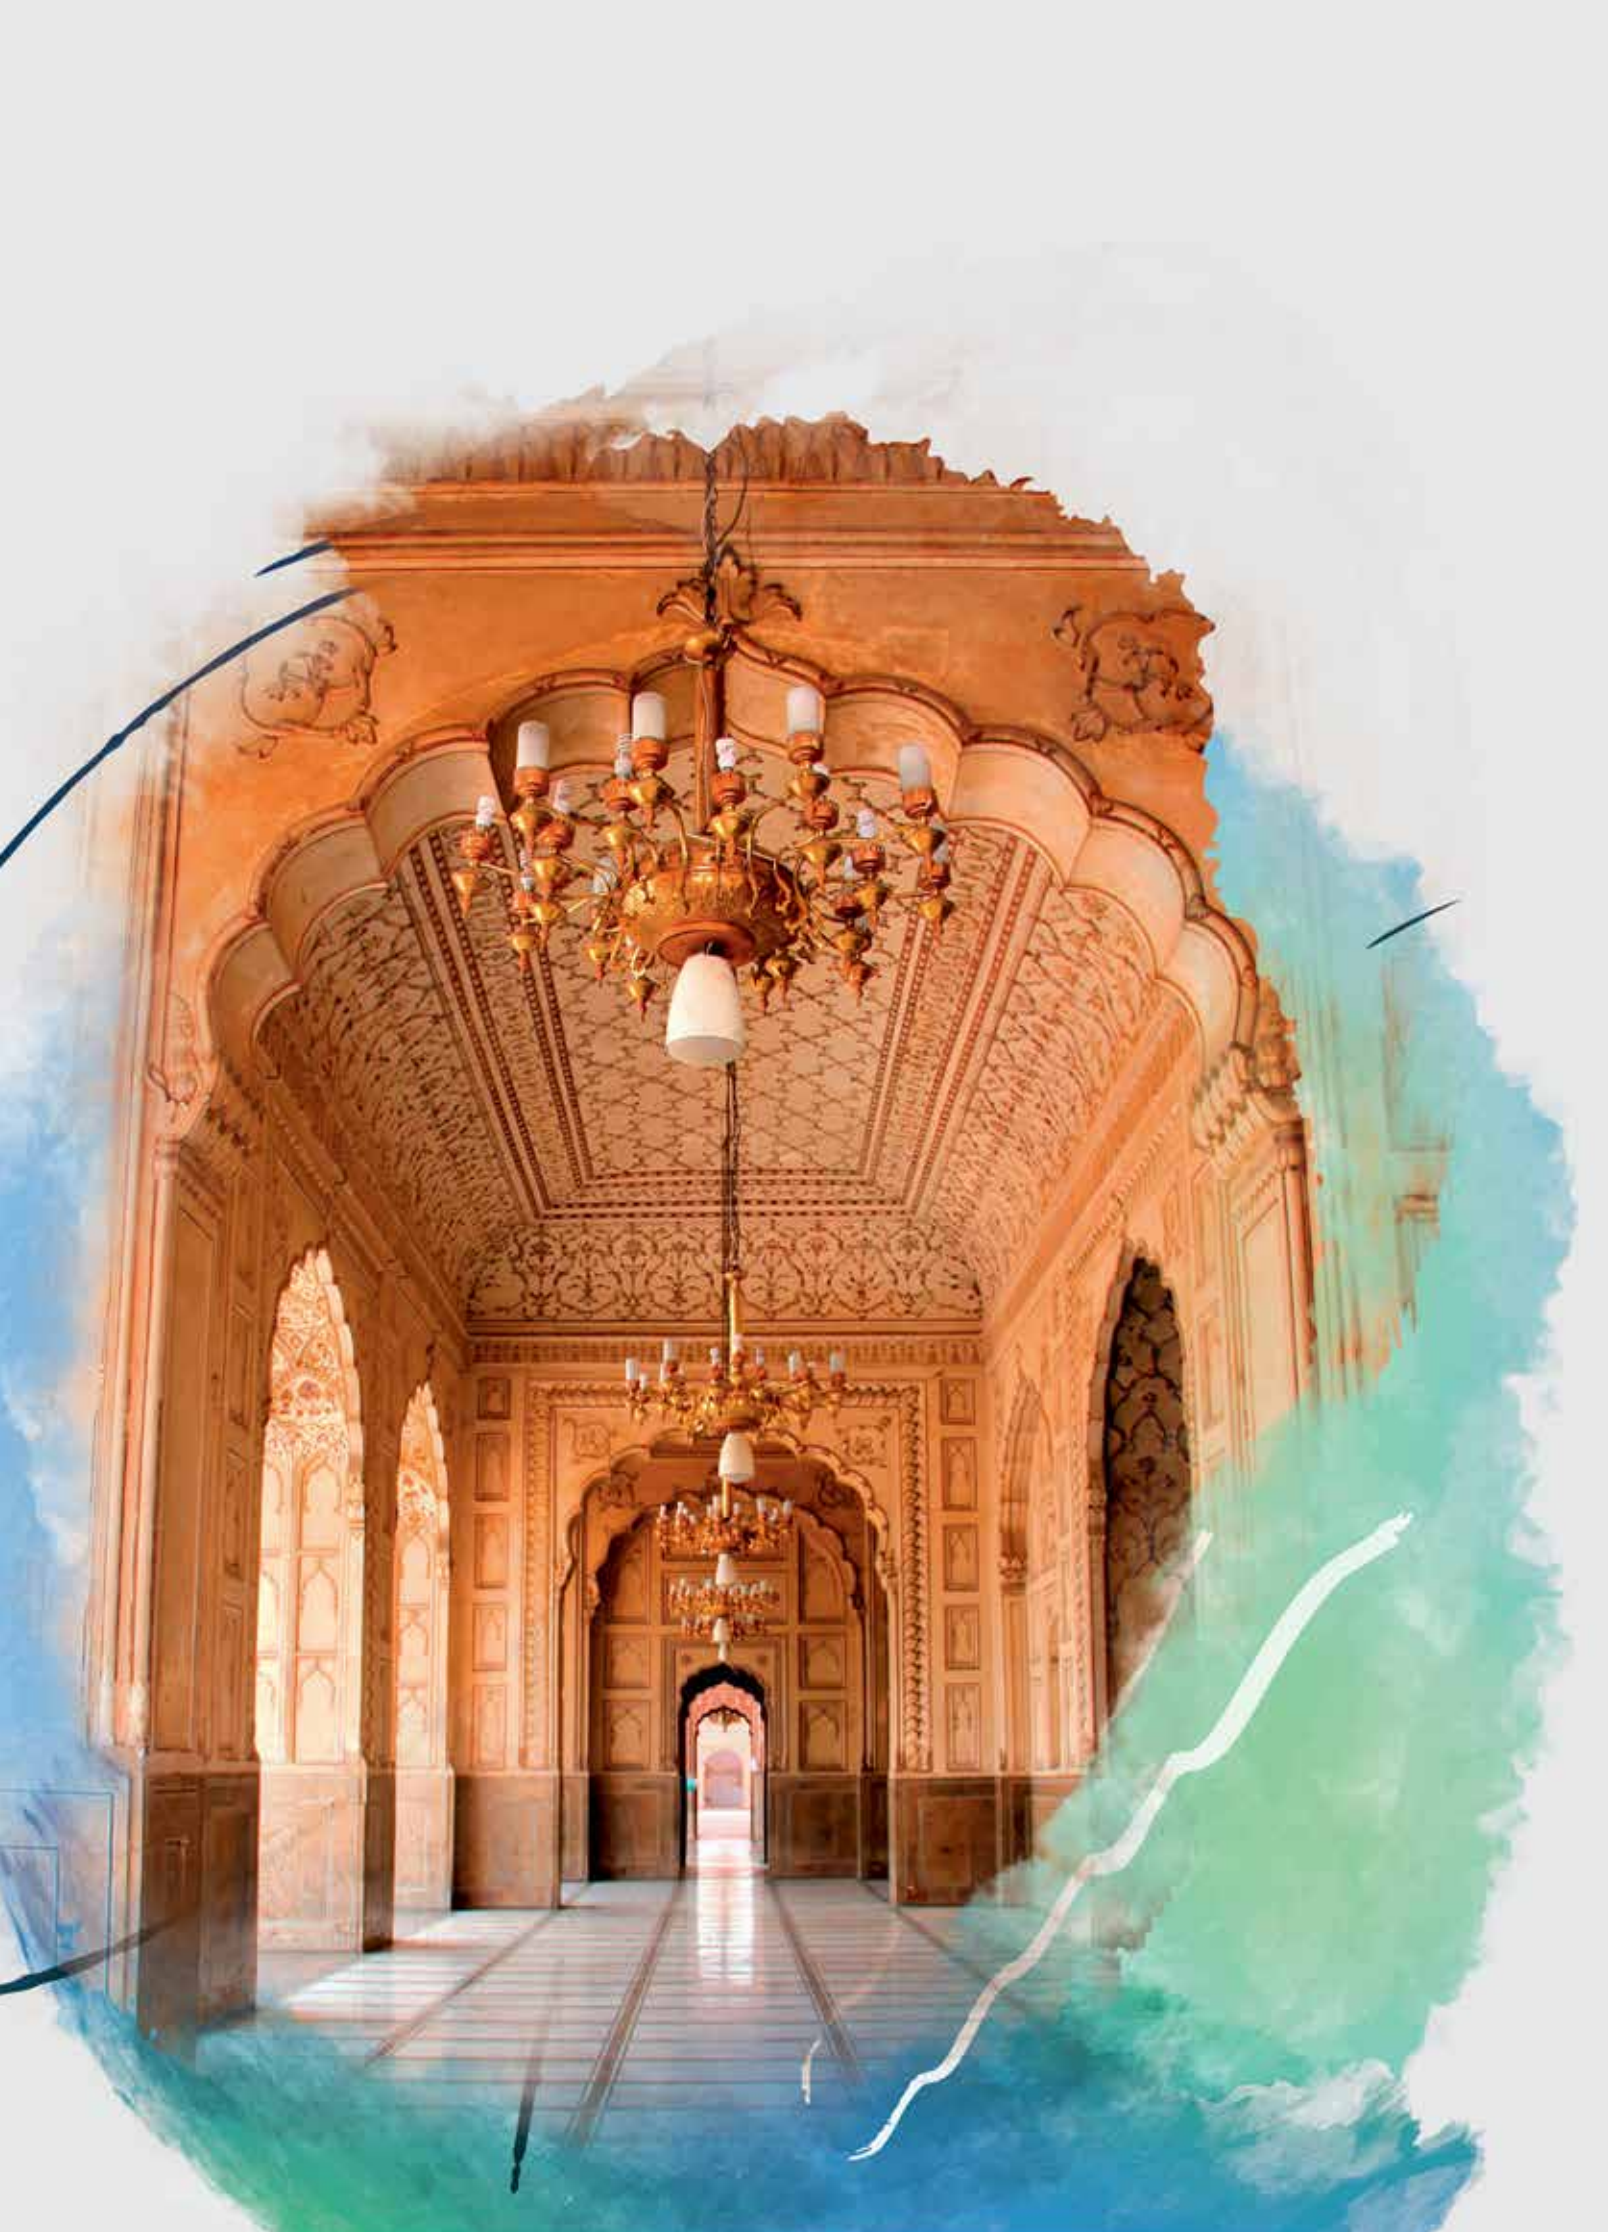

# Board of **Directors**

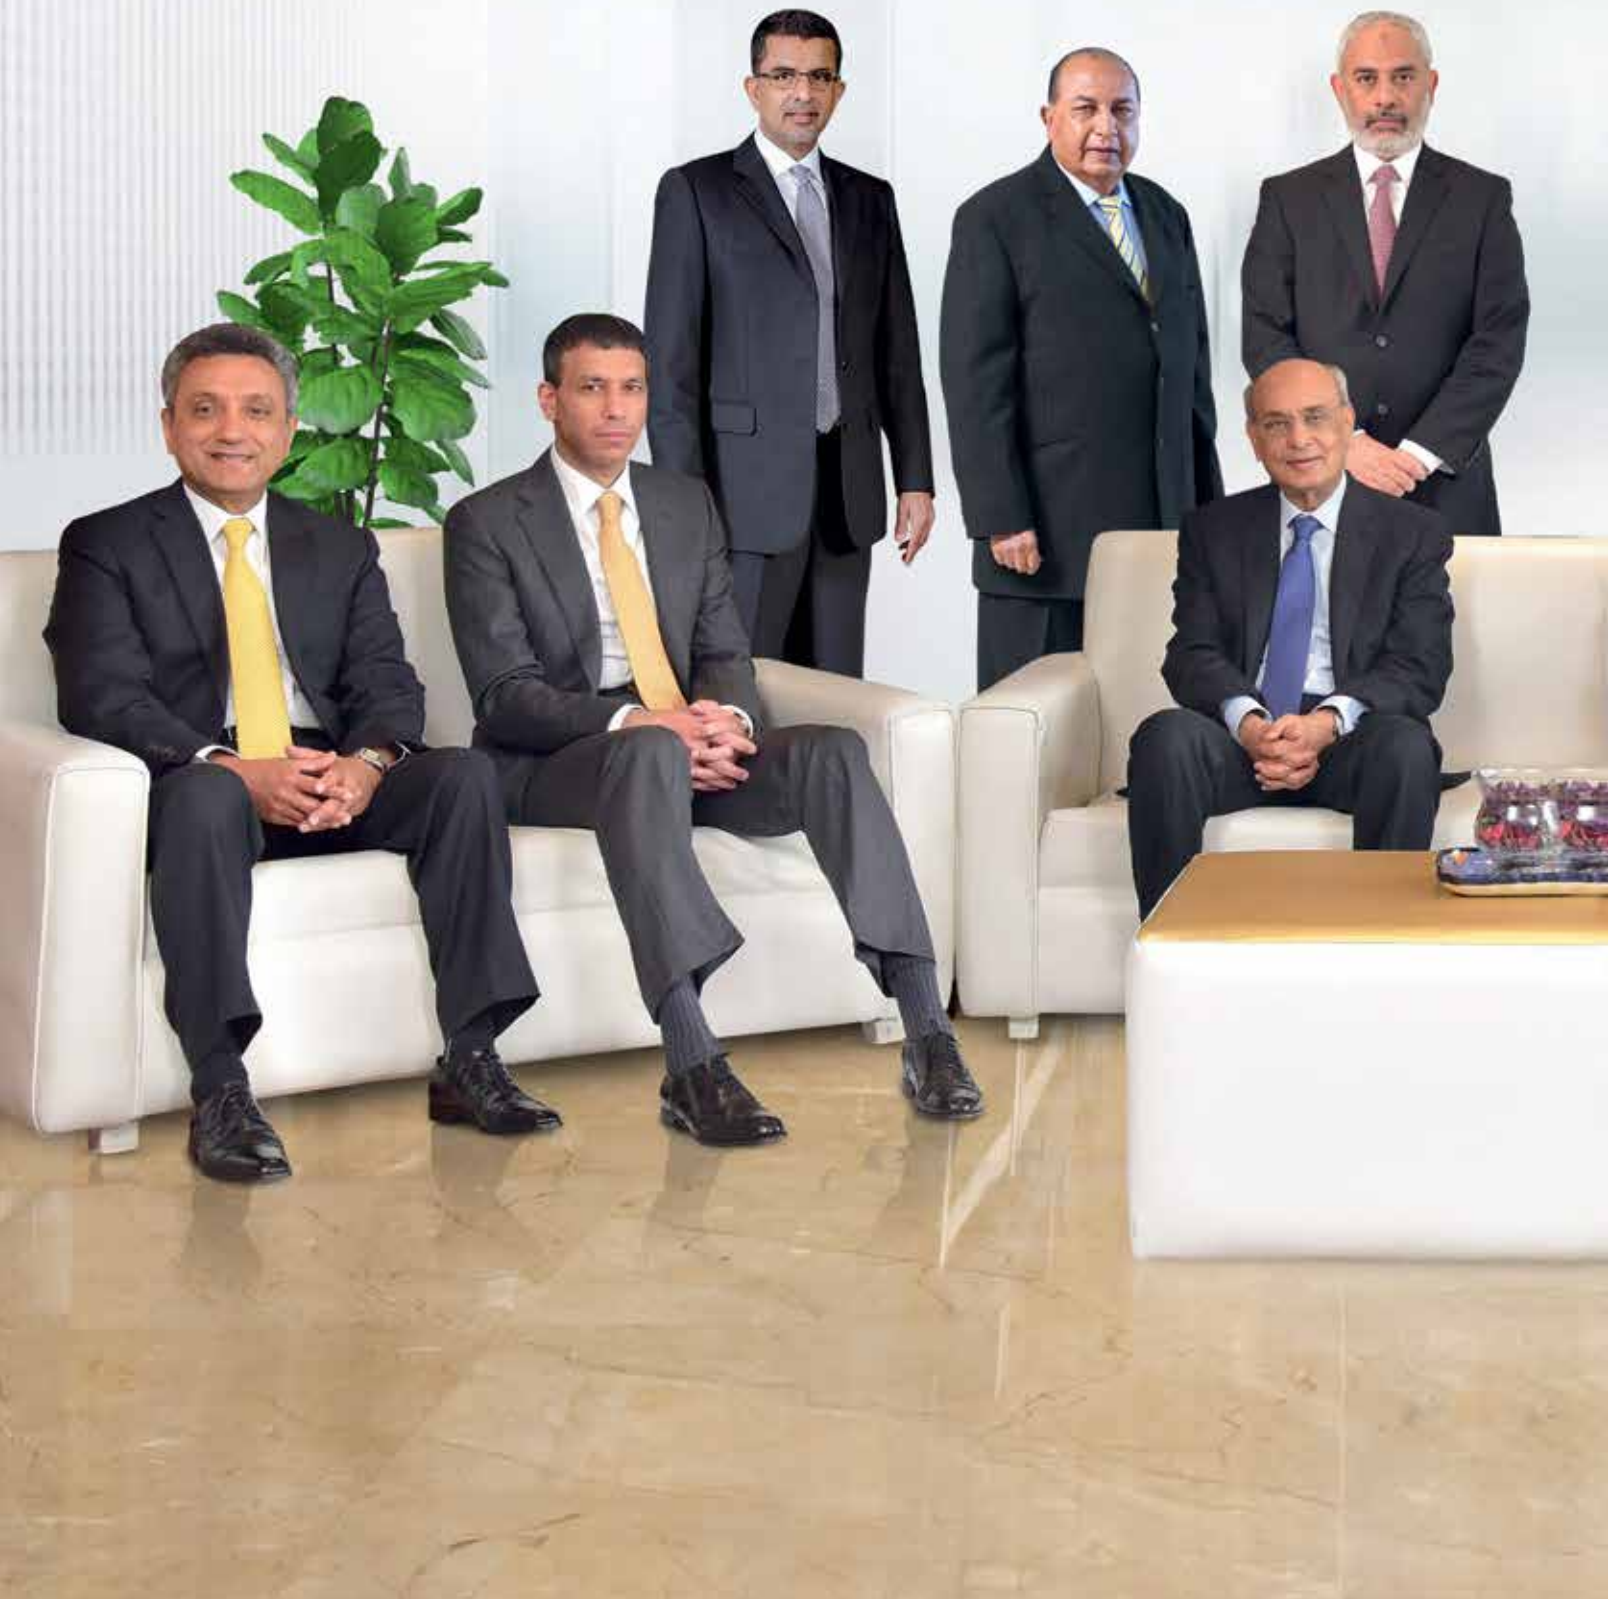

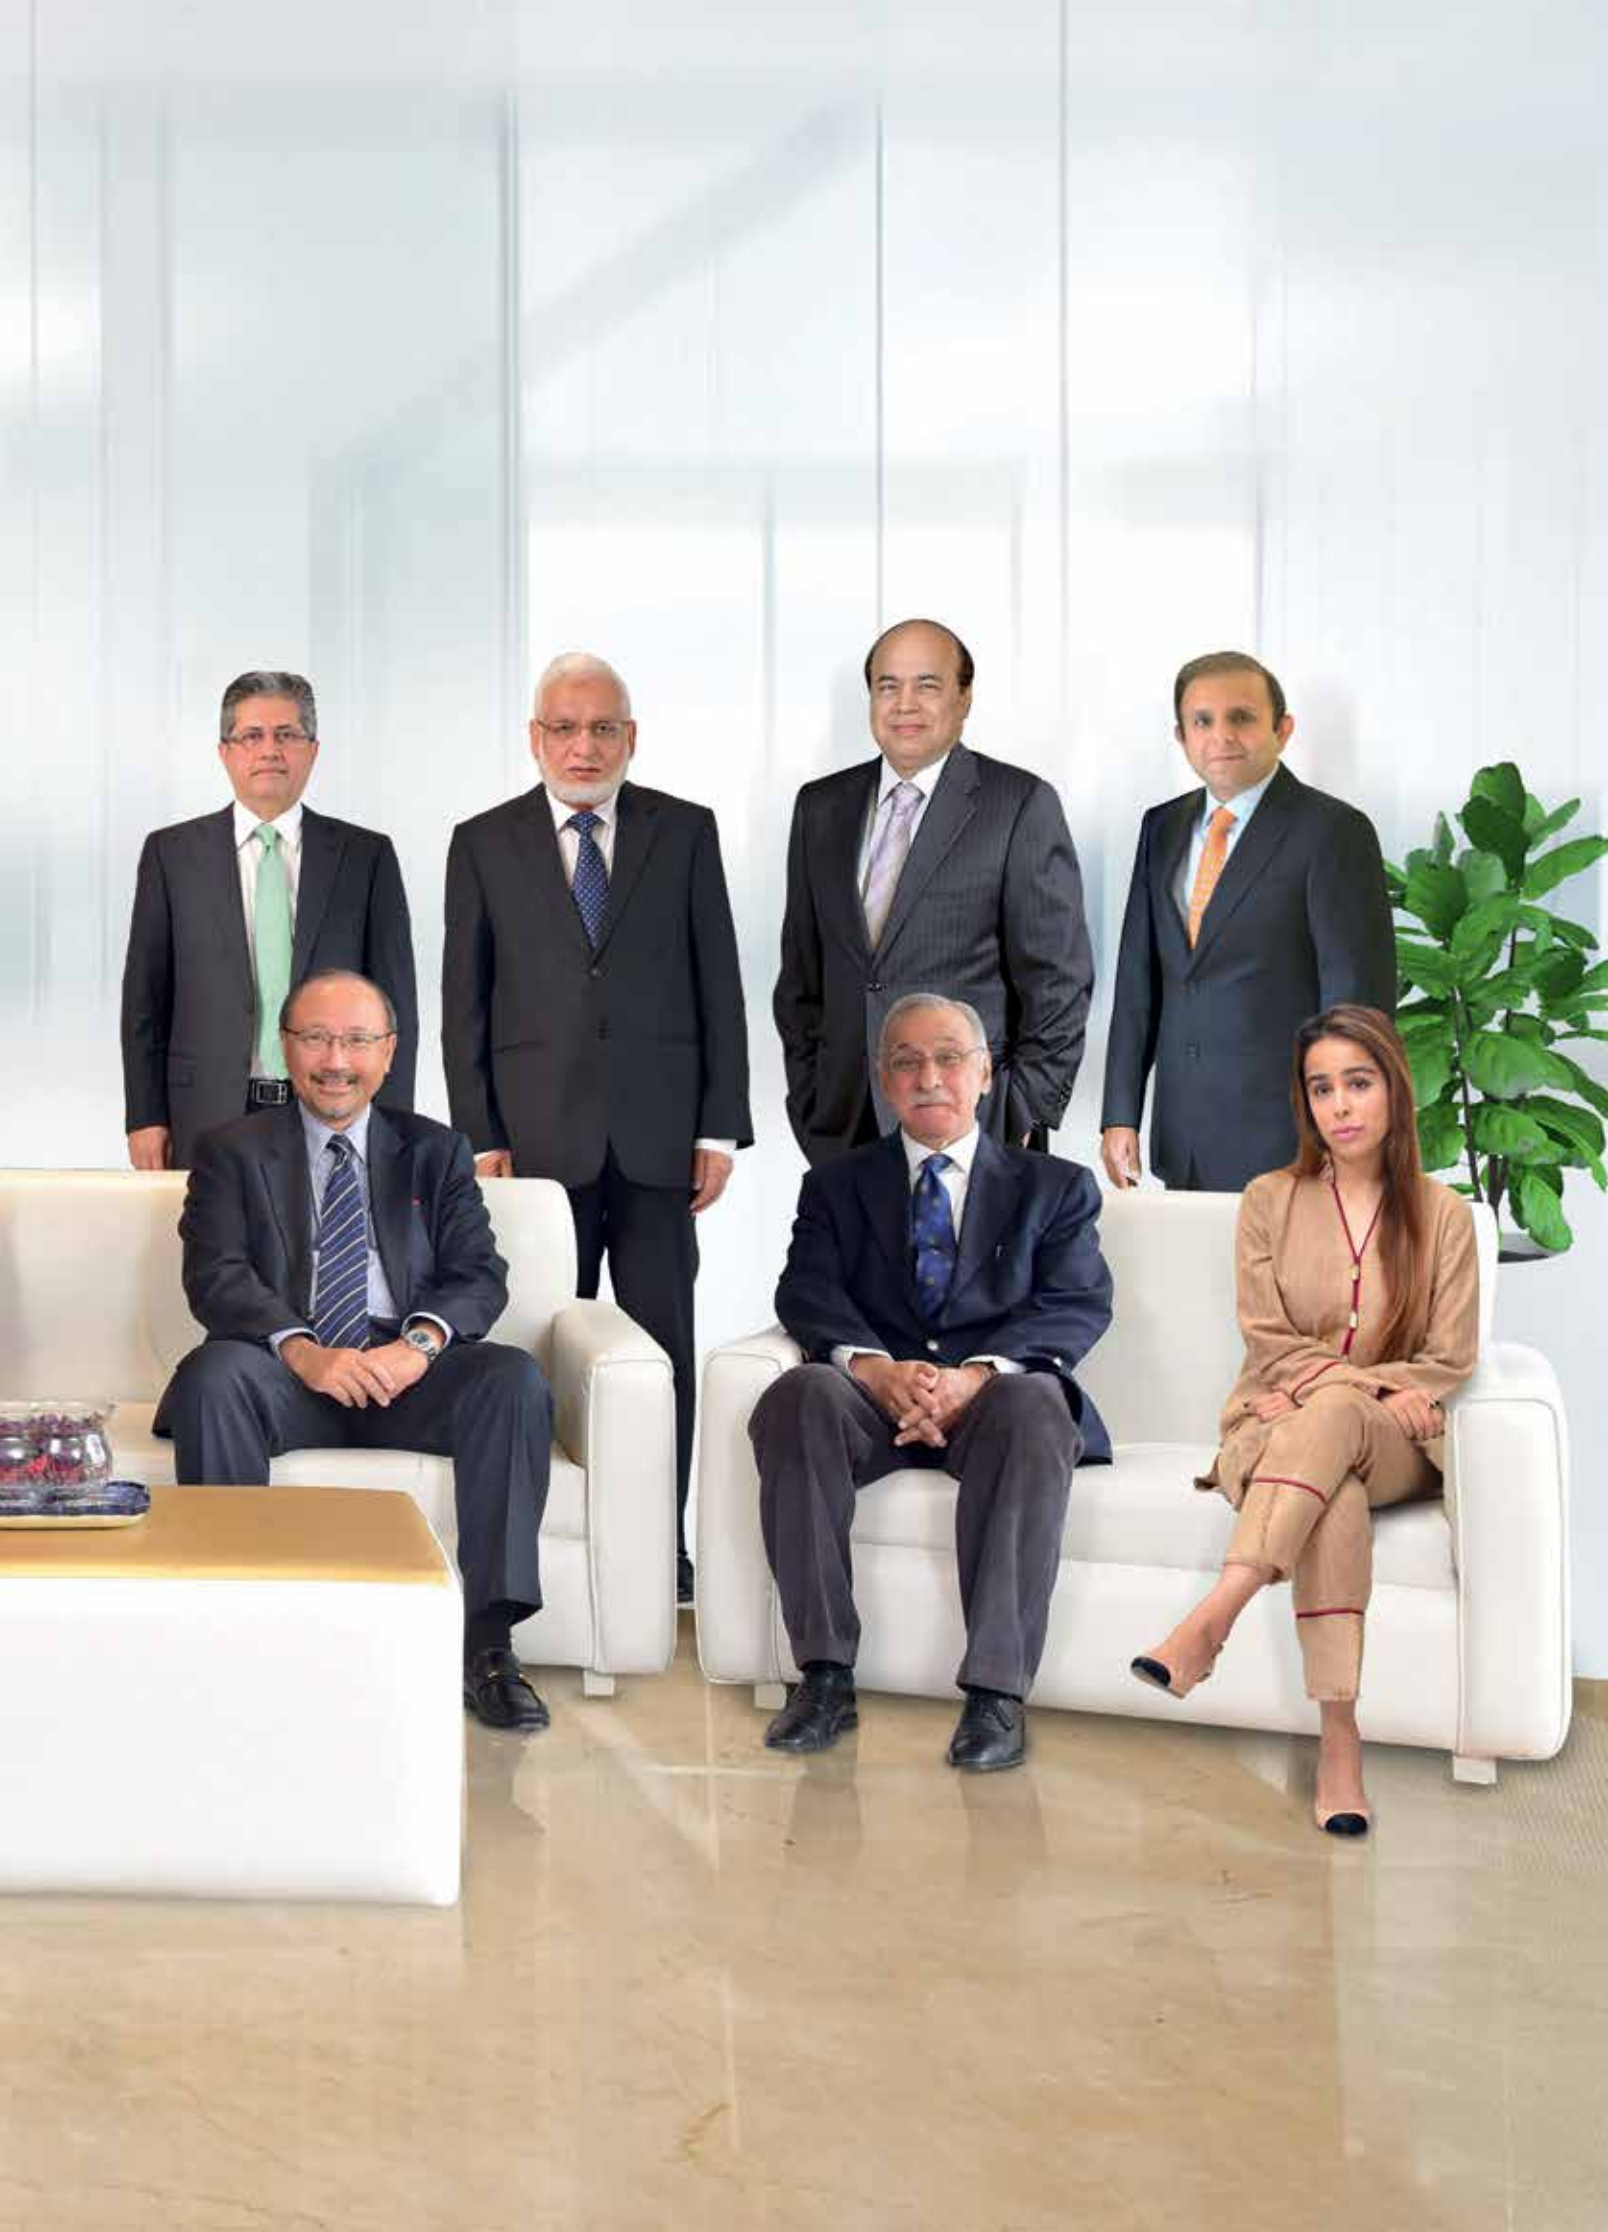

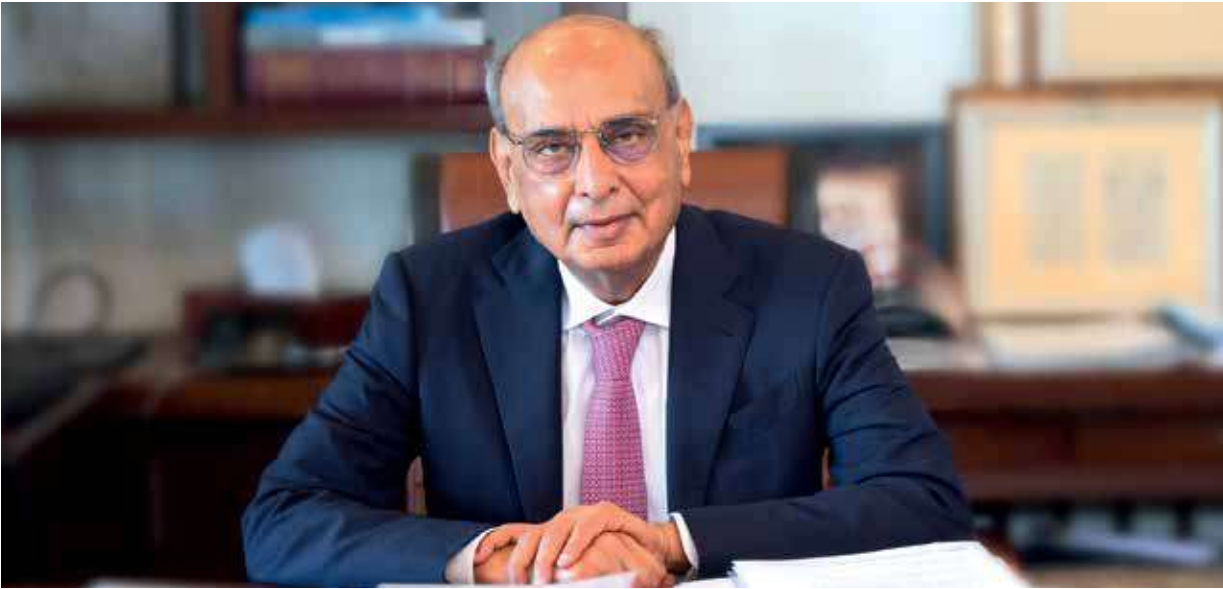

## Mian Mohammad Mansha

### Chairman

Mian Mohammad Mansha started his career at the age of 24 as the CEO for Nishat Mills Limited. At present, the business group is one of the leading and most diversified in South East Asia, having presence in Textile, Cement, Insurance, Banking, Financial Services, Power Generation, Hotel & Hospitality, Dairy, Paper Products, Retail Commerce, Real Estate, Agriculture, Aviation and Automotive sectors. It operates in various countries across the globe including Sri Lanka, Azerbaijan, UAE, USA, Hong Kong and Bahrain. The Nishat Group is one of the largest private sector employers, exporters and tax contributors in Pakistan.

Mr. Mansha has served as Chairman of MCB Bank, after its privatization, from 1991 to mid-1995 and then from 1997 till date. Presently, he is also a member of the Board's Human Resource & Remuneration Committee, Committee on Physical Planning & Contingency Arrangements and Business Strategy & Development Committee at MCB Bank Limited. Previously, he was associated with Punjab Mineral Company (Pvt) Limited, Civil Aviation Authority, Pakistan International Airlines, Board of Investment, Punjab Board of Investment & Trade, Pakistan Industrial Development Corporation (Pvt) Limited, Commonwealth Business Council UK, Int'l Advisory Board Babson College USA, National Management Foundation, Textile College Faisalabad and Government College of Faisalabad. He has also served as the Chairman for All Pakistan Textile Mills Association (APTMA) and APTMA, Punjab.

Mr. Mansha is also a committed philanthropist and provides regular support to numerous Pakistani charities and social causes. He has made significant contributions to Saleem Memorial Trust Hospital and to the Children's Hospital, Lahore for the upgrade of their pediatric cardiac surgery facilities. In the past he has lent personal support to Shaukat Khanum Memorial Trust, Lahore Hospital Welfare Society, Mind Organization, Human Rights Society of Pakistan, Kidney Care Centre, The Citizens Foundation, Friends of Pakistan Institute of Cardiology Trust, Care Foundation, SOS Village, Lahore Model School Sant Nagar, Aziz Jahan Trust for the Blind and Altaf Mehmood Foundation among many others.

He was presented with Pakistan's Civil Award, the Sitara-e-Imtiaz, for his contributions to industrial development, in 2004.

#### Other Directorships:

- MCB Non-Bank Credit Organization, CJSC, Azerbaijan.

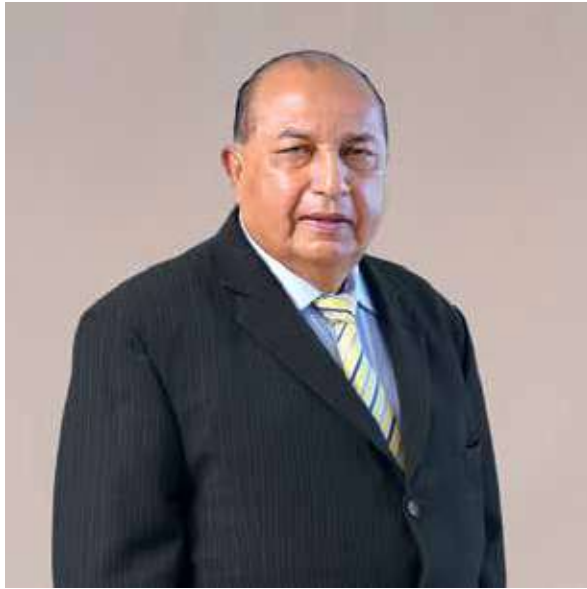

## S. M. Muneer

### Vice Chairman

With experience in sectors ranging from tanneries, textiles and banking, Mr. Muneer is a consummate industrialist and a certified director. He has been awarded with The Best Export Performance trophy by the Federation of Pakistan Chamber of Commerce & Industry (FPCCI), the Gold Medallion Award by the International Export Association, UK and the Best Businessman of the Year Award by Federation of Pakistan Chamber of Commerce & Industry (FPCCI). He is also a former President of FPCCI.

In addition, he has received the 'Sitara-e-Isaar' and the 'Sitara-e-Imtiaz' in 2006 and 2007 respectively by the President of Pakistan in recognition of his outstanding public services for the cause of humanity. His contributions and achievements go beyond the economic sphere and include education as well as health-care sectors. He was awarded an Honorary Ph.D. degree (doctorate of philosophy) in January, 2009 by the Governor of Sindh. He has also been appointed as a member of the Advisory Board of Citizen Police Liaison Committee (CPLC) by the Honourable Governor Sindh.

Mr. S. M. Muneer also serves as member of Board of various educational institutions, such as Institute of Business Management and Greenwich University, Karachi, Din College, Chiniot, College of Business Management, Karachi and Institute of Behavioral Sciences (IBS), Karachi and Professional Education Foundation. He is also a member of Advisory Council of Institute of Business Administration (IBA).

He is on the Board of Shaukat Khanum Memorial Trust, Lahore, The Kidney Centre Post Graduate Training Institute and Fatimid Foundation. He is Patron-in-Chief, Korangi Association of Trade and Industry (KATI), Kashif Iqbal Thalassaemia Care Centre, Trust (KITCC). Mr. Muneer is the Chairman of Chiniot Anjuman Islamia, running many hospitals, maternity homes, schools and colleges in Karachi, Faisalabad and Chiniot. He is also the Chairman of Husain Foundation (a not-for-profit organization working for improvement of cricket in Pakistan).

Mr. S. M. Muneer was awarded "Life Time Achievement Award" by the President of Pakistan, in 2012, and was also awarded Life Time Achievement Award in the same year in the City of Markham (Canada) by its Mayor Mr. Frank Scarpitti in the presence of members of the Parliament. He has also been awarded Who's Who recognition of Achievement Award in the field of Trade Politics by the National Council of Who's Who Pakistan in Karachi on December 29, 2018.

#### Other Directorships:

- Din Textile Mills Limited;
- Din Leather (Pvt) Limited;
- Din Farm Products (Pvt) Limited;
- Din Industries Limited;
- Arabian Sea Country Club

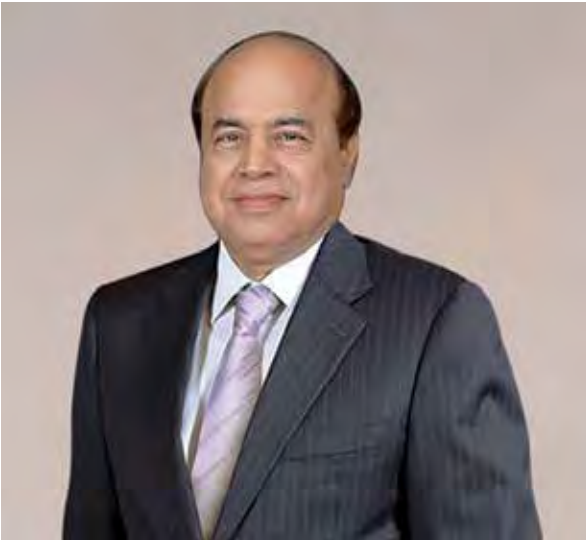

## Muhammad Tariq Rafi

Director

Mr. Tariq Rafi is the Chairman of Siddiqsons Group and is a recipient of the coveted Civil Award Sitara-e-Imtiaz. He was awarded the prestigious Best Businessman award for the year 1999 and 2012, best Export Trophies between years 1980 to 2005. Mr. Tariq Rafi has been awarded the Privilege Card by the Prime Minister of Islamic Republic of Pakistan for being one of the top tax payers. He is also the Honorary Consul General of Republic of Serbia.

He is on the board of MCB Bank since its privatization and presently is the member of Board's Write-off & Waiver Committee.

### Other Directorships:

- Siddiqsons Limited;
- Siddiqsons Tin Plate Limited;
- Central Depository Co. of Pakistan Limited;
- Siddiqsons Energy Limited.

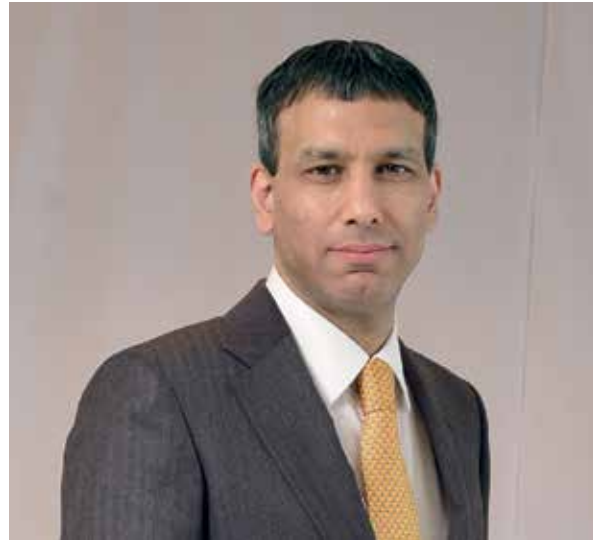

## Mian Umer Mansha

Director

Mian Umer Mansha was co-opted as a Director on the Board of MCB Bank in November 1997 and served till September 2007. Then he was elected as a Director in the Bank's 61st AGM held on March 27, 2009.

Presently, at MCB Bank he is the Chairman of the Board's Business Strategy & Development Committee, Information Technology Committee, Committee on Physical Planning & Contingency Arrangements and Write-off & Waiver Committee and is also a member of Audit Committee and Risk Management & Portfolio Review Committee.

In addition, he has been serving on the board of various other businesses. Mr. Umer received his Bachelors degree from Babson College, Boston, USA.

### Other Directorships:

- Nishat Mills Limited;
- Adamjee Insurance Company Limited;
- Adamjee Life Assurance Company Limited;
- Nishat Hotels & Properties Limited;
- Nishat Developers (Pvt) Limited;
- Nishat Dairy (Pvt) Limited;
- Nishat (Raiwind) Hotels and Properties Limited;
- Nishat Agriculture Farming (Pvt) Limited;
- Hyundai Nishat Motor (Pvt) Limited;
- Nishat Agrotech Farms (Pvt) Limited;
- Nishat Sutas Dairy Limited.

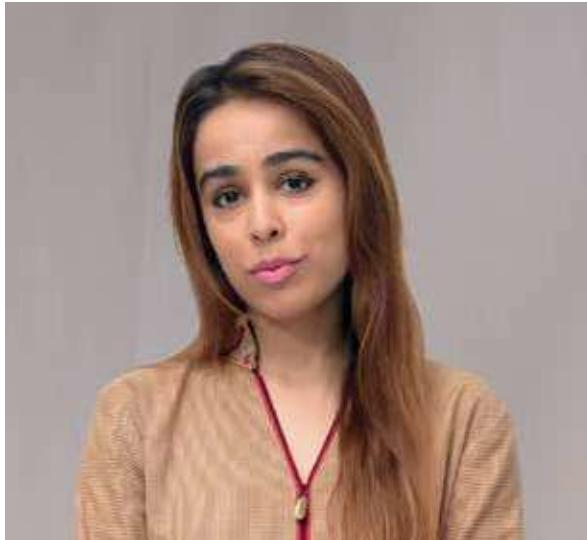

### **Iqraa Hassan Mansha** Director

Mrs. Iqraa Hassan Mansha has more than 9 years diversified professional experience in Hotel Industry. She received her B.Sc. Degree in International Politics from London School of Economics and M.Sc. degree in International Relations from the University of London School of Oriental and African Studies (SOAS).

She is serving in the capacity of Executive Director of Nishat Hotels and Properties Limited. She is also acting as Director on the Board of the following companies:

#### **Other Directorships:**

- Nishat (Raiwind) Hotels and Properties Limited;
- Nishat Real Estate Development Company (Pvt) Limited;
- Emporium Properties (Pvt) Limited.

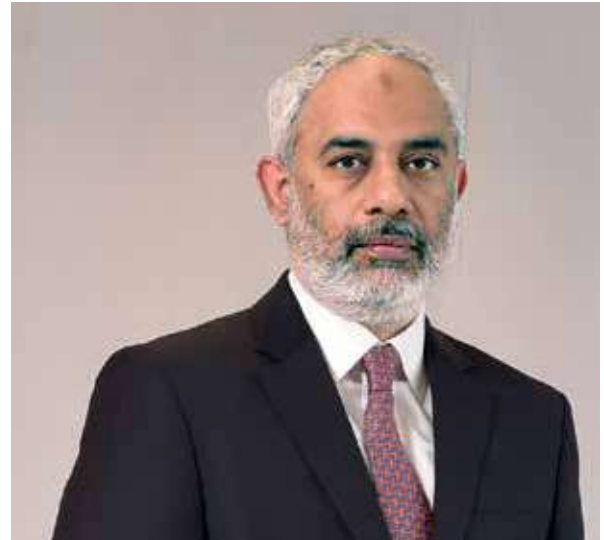

### **Muhammad Ali Zeb** Director

Mr. Zeb is currently the CEO and Managing Director of Adamjee Insurance Company Limited. He is a fellow member of the Institute of Chartered Accountants of Pakistan and has over 22 years of diversified professional experience in the fields of Finance, Insurance & Manufacturing. He also served as council member of Insurance Association of Pakistan and Pakistan Insurance Institute. Insurance Association of Pakistan elected him as the Chairman for the year 2014 in terms of its Constitution.

He was co-opted as a Director on the Board of MCB Bank in June 2013. At MCB Bank, presently he is the Chairman of the Board's Risk Management & Portfolio Review Committee and a member of Board's Audit Committee, Human Resource & Remuneration Committee, Compliance Review & Monitoring Committee, Committee on Physical Planning & Contingency Arrangements and Write-Off & Waiver Committee.

#### **Other Directorships:**

- Adamjee Insurance Company Limited;
- Adamjee Life Assurance Company Limited;
- Nishat Sutas Dairy Limited.

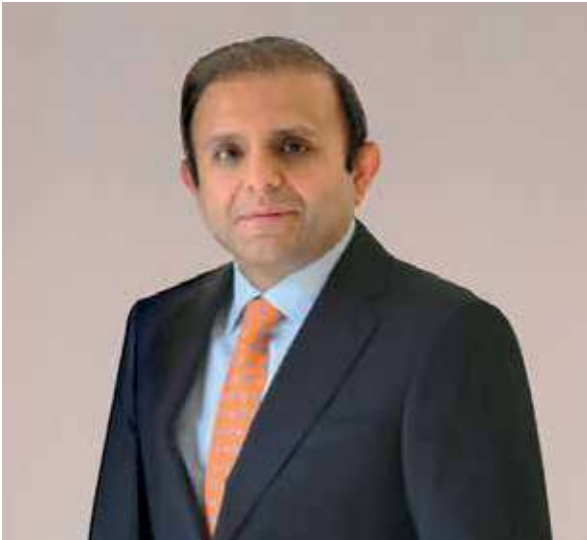

## Yahya Saleem

Director

After graduating from the Lahore University of Management Sciences (LUMS), Mr. Yahya joined the family business as director of the Nishat Chunian Group with setting up a spinning mill in 1990. The company has since diversified into weaving, home textile, power generation and entertainment sectors. Today with a turnover of PKR 39.337 billion, NCL ranks amongst the top 5 textile companies in Pakistan.

The group ventured into the power business in 2007 with a 200 MW Independent Power Plant (IPP), Nishat Chunian Power Ltd. With a turnover of PKR 15.021 billion in 2019, the IPP provides electricity to the national grid. Both the companies are listed on Pakistan Stock Exchange.

Together with his family, he has set up a Trust which is in memory of Sheikh Mohammad Saleem and has initiated setting up of a 200 bed tertiary care not-for-profit hospital in Lahore. The hospital will be built to state of the art international standards and will provide subsidized health care to the under privileged section of the city.

In 2015 he started a company by the name of NC Trading USA that is a Cotton trading company based in USA and actively sells US cotton in Pakistan. In 2017 NC Trading USA sold cotton worth USD 50 million to the leading textile mills in Pakistan.

In 2019, he was appointed as CEO and Director of NC Entertainment Private Limited which owns two Multiplexes, widely known as "Universal Cinemas", including largest multiplex in Pakistan.

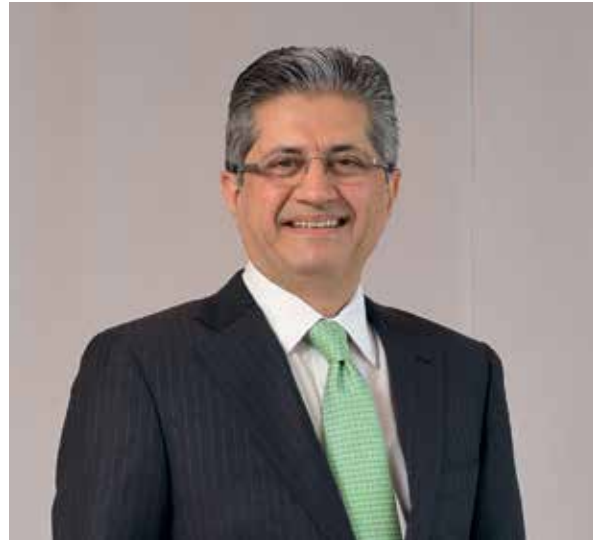

## Salman Khalid Butt

Director

Mr. Salman Butt is an accomplished international business executive and ex-banker. He is currently a Dubai, U.A.E. based Entrepreneur.

Mr. Salman Butt started his career with Citibank N.A. in 1985 and worked for 20 years as an international banker with Citibank N.A. and Samba Financial Group, holding several senior positions in Corporate and Investment Banking in Pakistan, Hong Kong, UK, Egypt and Saudi Arabia.

Mr. Salman Butt joined Orascom Construction Industries, Egypt (OCI Egypt) as Group CFO in 2005. OCI Egypt was a leading Egyptian multinational listed on Cairo Stock Exchange and involved in Construction, Fertilizers and Cement operations. In 2013, OCI Egypt was re-domiciled as OCI N.V. Netherlands and listed on Amsterdam Stock Exchange, where he continued as Executive Director and Group CFO from 2013 to 2017.

Mr. Salman Butt has a Masters of Business Administration degree from the University of Texas at Austin, Texas, U.S. and a B.Sc. Industrial Engineering degree from Middle East Technical University, Ankara, Turkey.



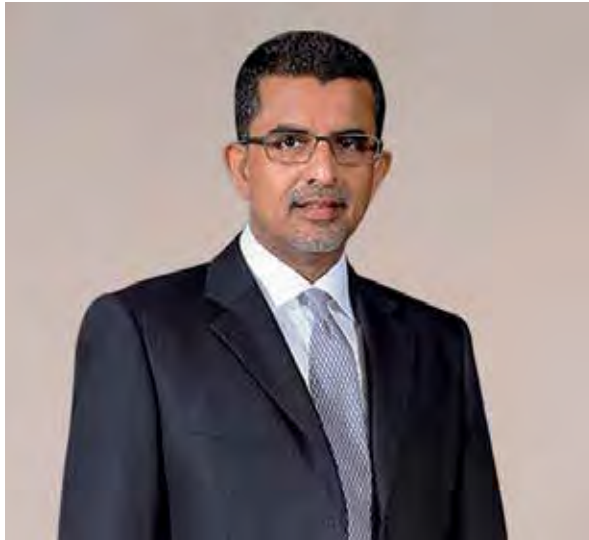

## Mohd Suhail Amar Suresh Bin Abdullah

### Director

Mr. Suhail has over 30 years of combined global experience in the telecommunications and financial services sector specialising in IT architecture, systems and application development, regional implementation and business development. His passion in technology drives him to effectively utilise technology as a competitive advantage for enhanced customer experience.

Mr. Suhail is currently the Group Chief Technology Officer for Maybank, Malaysia's largest Financial Services Institution. His previously held positions include Managing Director of Bank Negara Malaysia's wholly-owned subsidiary Malaysian Electronic Clearing Corporation Sdn Bhd (MyClear) and Group Managing Director of Malaysian Electronic Payment System Sdn Bhd (MEPS).

Notable awards received include CIO Excellence Award 2016 by PIKOM, Bank Technology Leadership Achievement in Asia Pacific for outstanding technology leadership by The Asian Banker, 2017 and he was named as one of the top financial services CIOs in South East Asia by International Data Group (IDG), CIO.com 2018

Presently, Mr. Suhail is a Director on the Board of MCB Bank Limited and a member of the Board's Business Strategy & Development Committee, Risk Management & Portfolio Review Committee and Information Technology Committee. Other directorships include Maybank Shared Services Sdn Bhd, MBB Labs Pvt. Ltd. and Technology Park Malaysia Corporation, Sdn. Bhd.

His credentials including being a Fellow of the Malaysian Institute of Management and Associate of the Asian Institute of Chartered Bankers Association, Chartered Banker from the Asian Institute of Chartered Banker as well as holding a Master of Business Administration from Charles Sturt University, Australia and an Advanced Management Program from Harvard Business School.

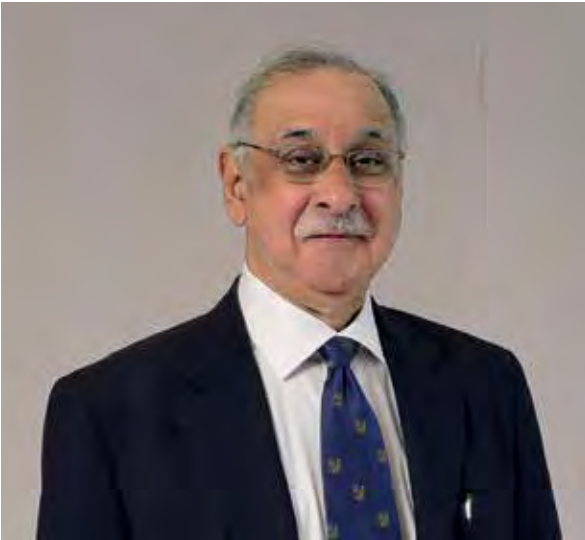

**Shahzad Hussain**  
Director

After passing the final exam of England Institute of Chartered Accountants, i.e., The Institute of Chartered Accountants in England and Wales (ICAEW), Mr. Shahzad Hussain returned to Pakistan from UK, in early 1980s. In Pakistan, he became a member of the Institute of Chartered Accountants of Pakistan i.e. ICAP. Later, he was elected as a member of its Council for a term of four years and also served as Vice President (North), where he chaired the ICAP's Discipline Committee, reporting to the Council.

In 1980, after serving briefly in SNGPL, he joined A. F. Ferguson and Co., a network firm of Price Waterhouse Coopers (PwC). In early 1990's he was admitted to partnership and served the firm in Audit, Tax and consultancy. In 2003, he was made Partner In-Charge of Lahore Office, where he served until his retirement in 2015.

He has vast experience in Audit, Tax practice and in consultancy. He headed many assignments, including Asian Development Bank funded assignment for Punjab Government Resource Mobilization, where he gained considerable experience in Provincial Government organization structures and procedures in various fields.

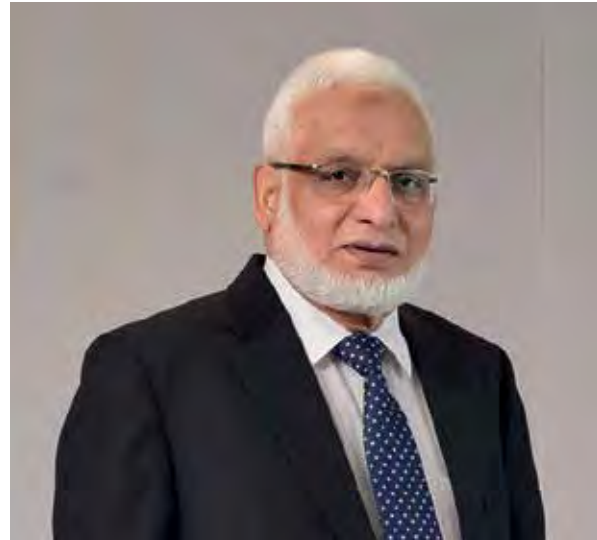

**Masood Ahmed Puri**  
Director

Mr. Masood Ahmed Puri is a multifaceted and accomplished senior executive with competencies in strategic and business planning, risk management and sound decision-making. He is a CEO and owner of different conglomerates in the field of logistics, shipping, supply chain, restaurants and textile within the GCC region for almost 45 Years. He started his career with Vegetable Ghee Industry in Pakistan but later on switched to logistics and shipping in the year 1976. He was hired as General Manager Finance in a logistics company in Saudi Arabia from where he took off and managed the overall operations of the Company. One after another, he kept on developing new businesses in the same field as well as diversified into textiles and restaurants all within the GCC region. Overall, he carries immense experience and exposure in various fields such as finance, corporate strategy, management, operations and most importantly on business start-ups.

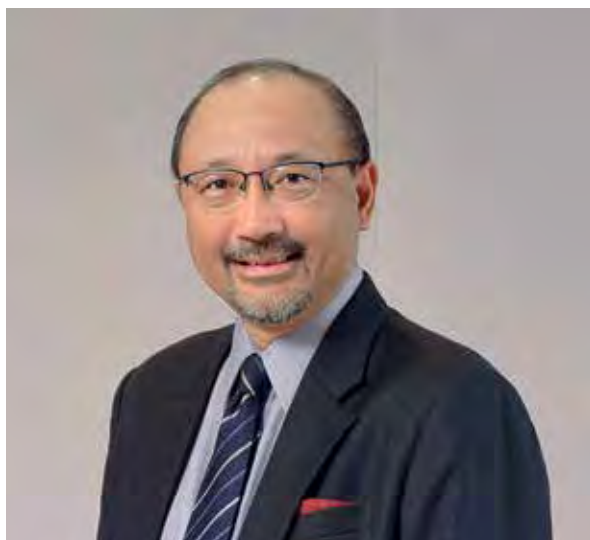

### Shariffuddin Bin Khalid

Director

Mr. Shariffuddin Khalid was appointed as an Independent Non-Executive Director of Maybank on June 14, 2018. He also serves as Chairman of the Audit Committee and member of the Compliance Committee of the Board. He is a Fellow Member of the Chartered Institute of Management Accountants, United Kingdom. He has over 30 years' experience in the banking and corporate sector. He had served in key positions in the corporate services, business development, corporate communications and human resource functions. He was part of the pioneer management team tasked with the establishment of Pengurusan Danaharta Nasional Berhad ("Danaharta") during the 1998 Asian financial crisis. He served as General Manager, Communications and Human Resource, Danaharta, from its establishment in 1998 until 2005. He joined Bank Negara Malaysia (BNM), the Malaysian Central Bank and banking industry regulator in 2008, as the pioneer Director of the Malaysia International Islamic Finance Center. In this position, he was responsible for planning and execution of strategies to position and brand Malaysia as an international Islamic financial center. He spent nearly 10 years at BNM and his final position was Director, Strategic Communications. This entailed the provision of strategic communication advice to the BNM Governor and senior leaders, planning and execution of major media and PR campaigns as well as Parliamentary responses and all media relations and e-communications work. His current directorship within the Maybank Group includes Maybank (Cambodia) Plc and Maybank Islamic Bhd. Currently he also sits on the Board of Marine & General Berhad, a public company listed on the Main Market of Bursa Malaysia, as well as its subsidiaries.

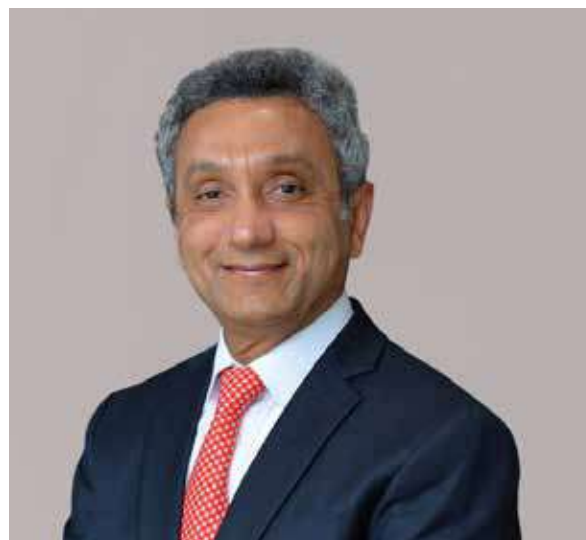

### Imran Maqbool

President & CEO

Mr. Imran Maqbool serves as President & Chief Executive Officer of MCB Bank Limited. He is a seasoned professional with over three decades of diverse, international banking experience. Prior to his current role, he was the Head of Commercial Branch Banking Group, where he successfully managed the largest group of the Bank in terms of market diversity, size of the workforce, number of branches, on a countrywide basis and diversified spectrum of products. His earlier, multi-faceted Group-Head assignments included heading Wholesale Banking Group-North, Special Assets Management and Islamic Banking. He was also posted as Country Head, MCB Sri Lanka.

Before joining MCB Bank in 2002, Mr. Maqbool was associated with local banking operations of Bank of America and Citibank for over seventeen years, where he worked in various senior management roles in the respective banks.

Mr. Maqbool holds an MBA degree from the Institute of Business Administration (IBA-Karachi) as well as an MS in Management from the renowned Sloan School of Management (Massachusetts Institute of Technology) in the USA.

Mr. Maqbool also serves as Trustee/ Chairman of MCB Employees Foundation.

#### Other Directorships:

- Adamjee Insurance Company Limited;
- Adamjee Life Assurance Company Limited.

# Organizational Structure

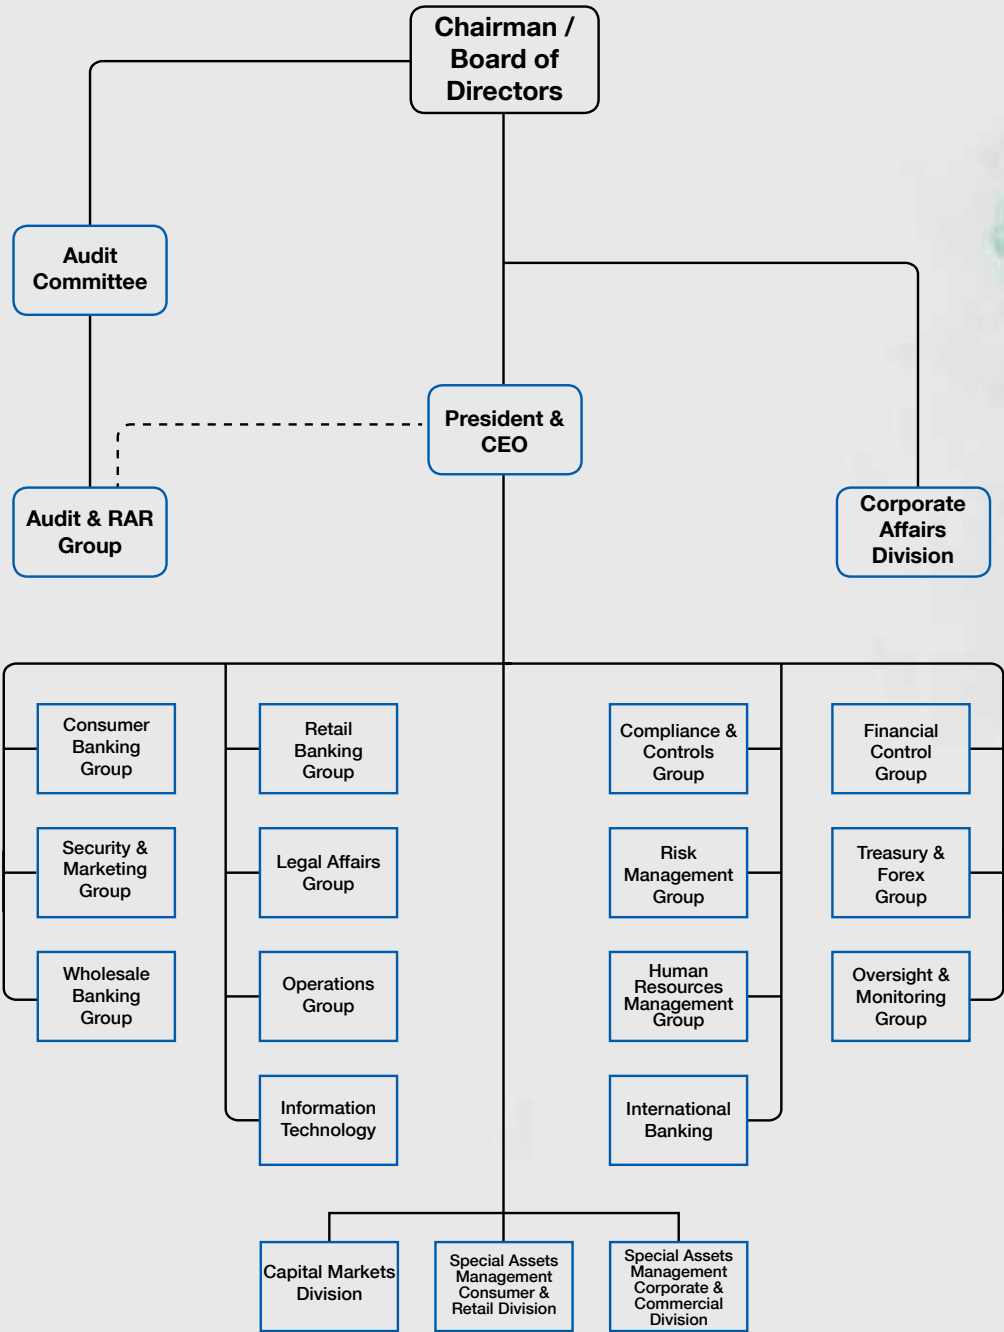

- - - - Administrative Reporting  
 ——— Functional Reporting

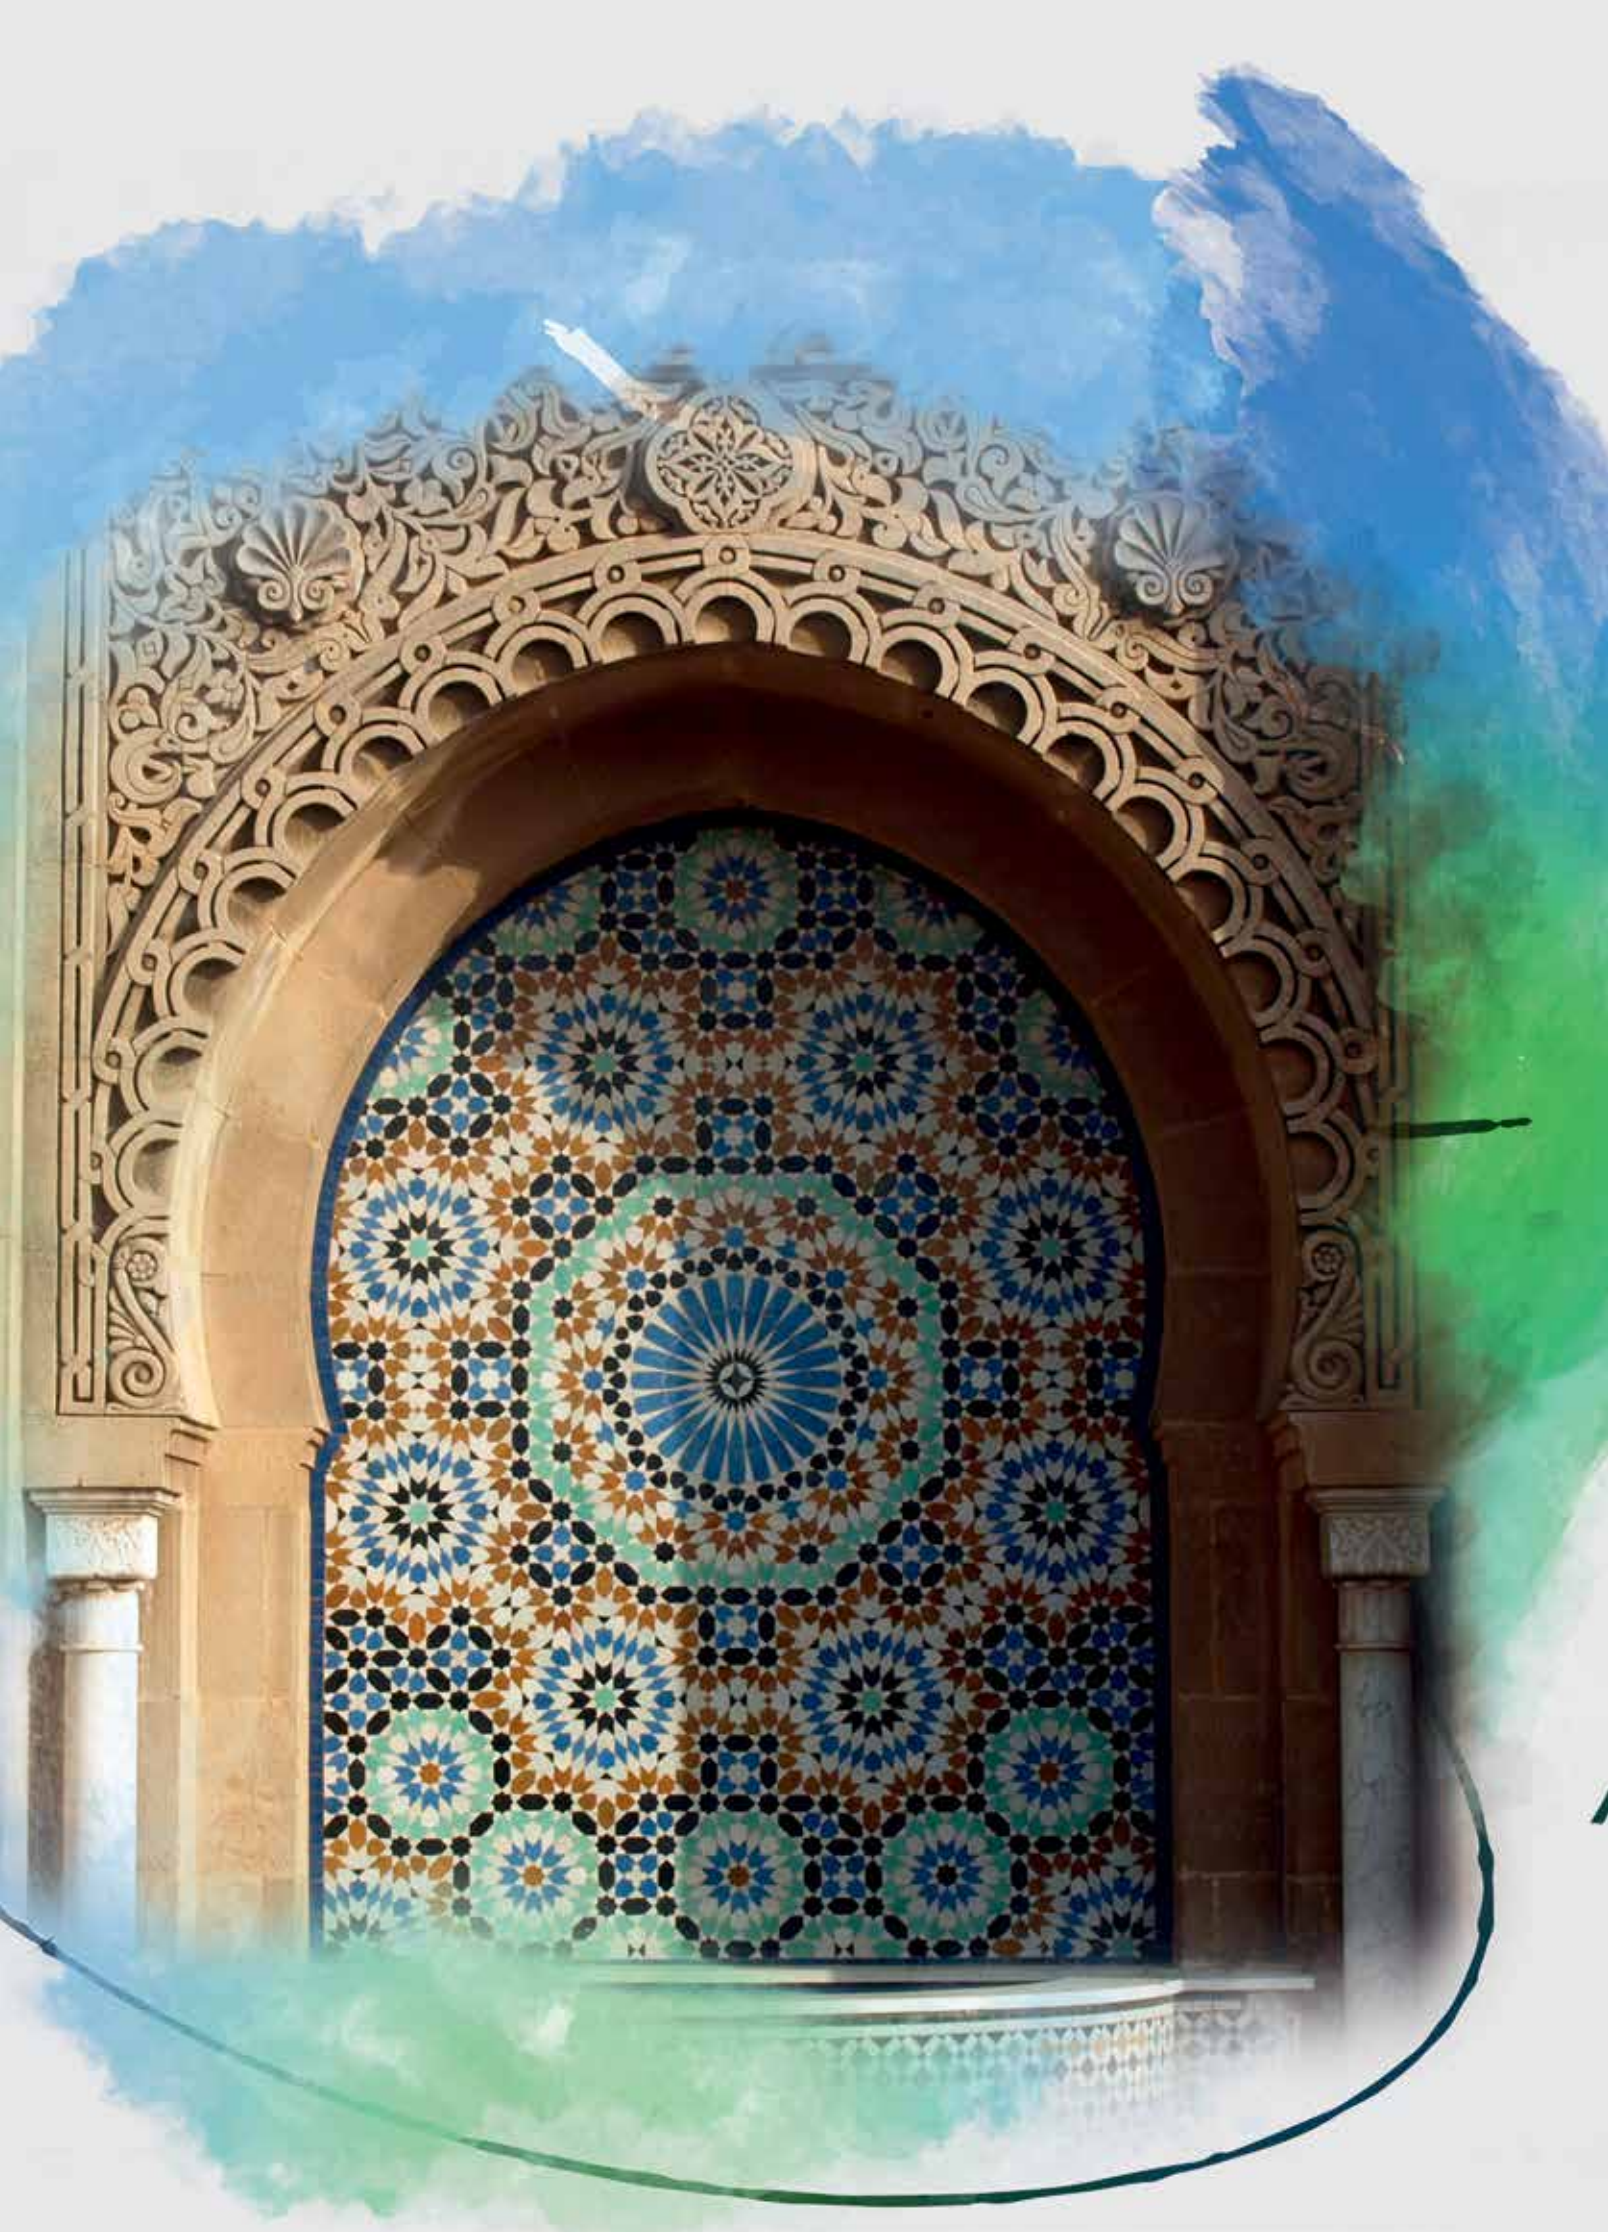

# Management Committee

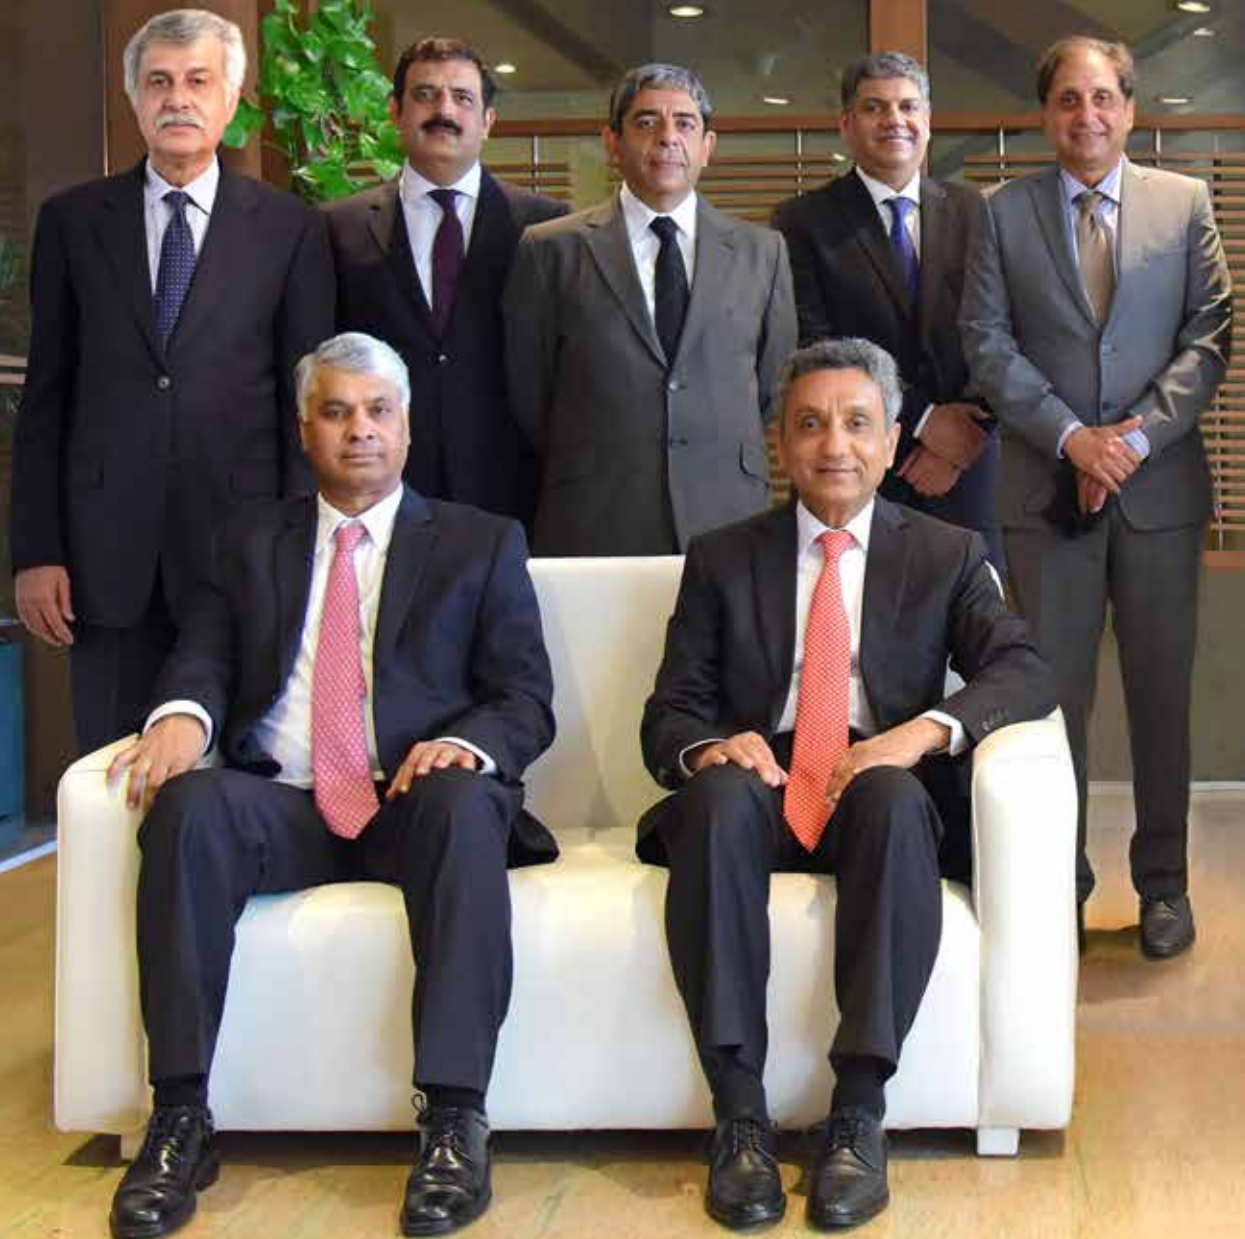

Standing L to R: Syed Mudassar Hussain Naqvi, Abrar Aleem, Usman Hassan, Shahzad Ishaq, Farid Ahmad  
Sitting L to R: Hassan Nawaz Tarar, Imran Maqbool

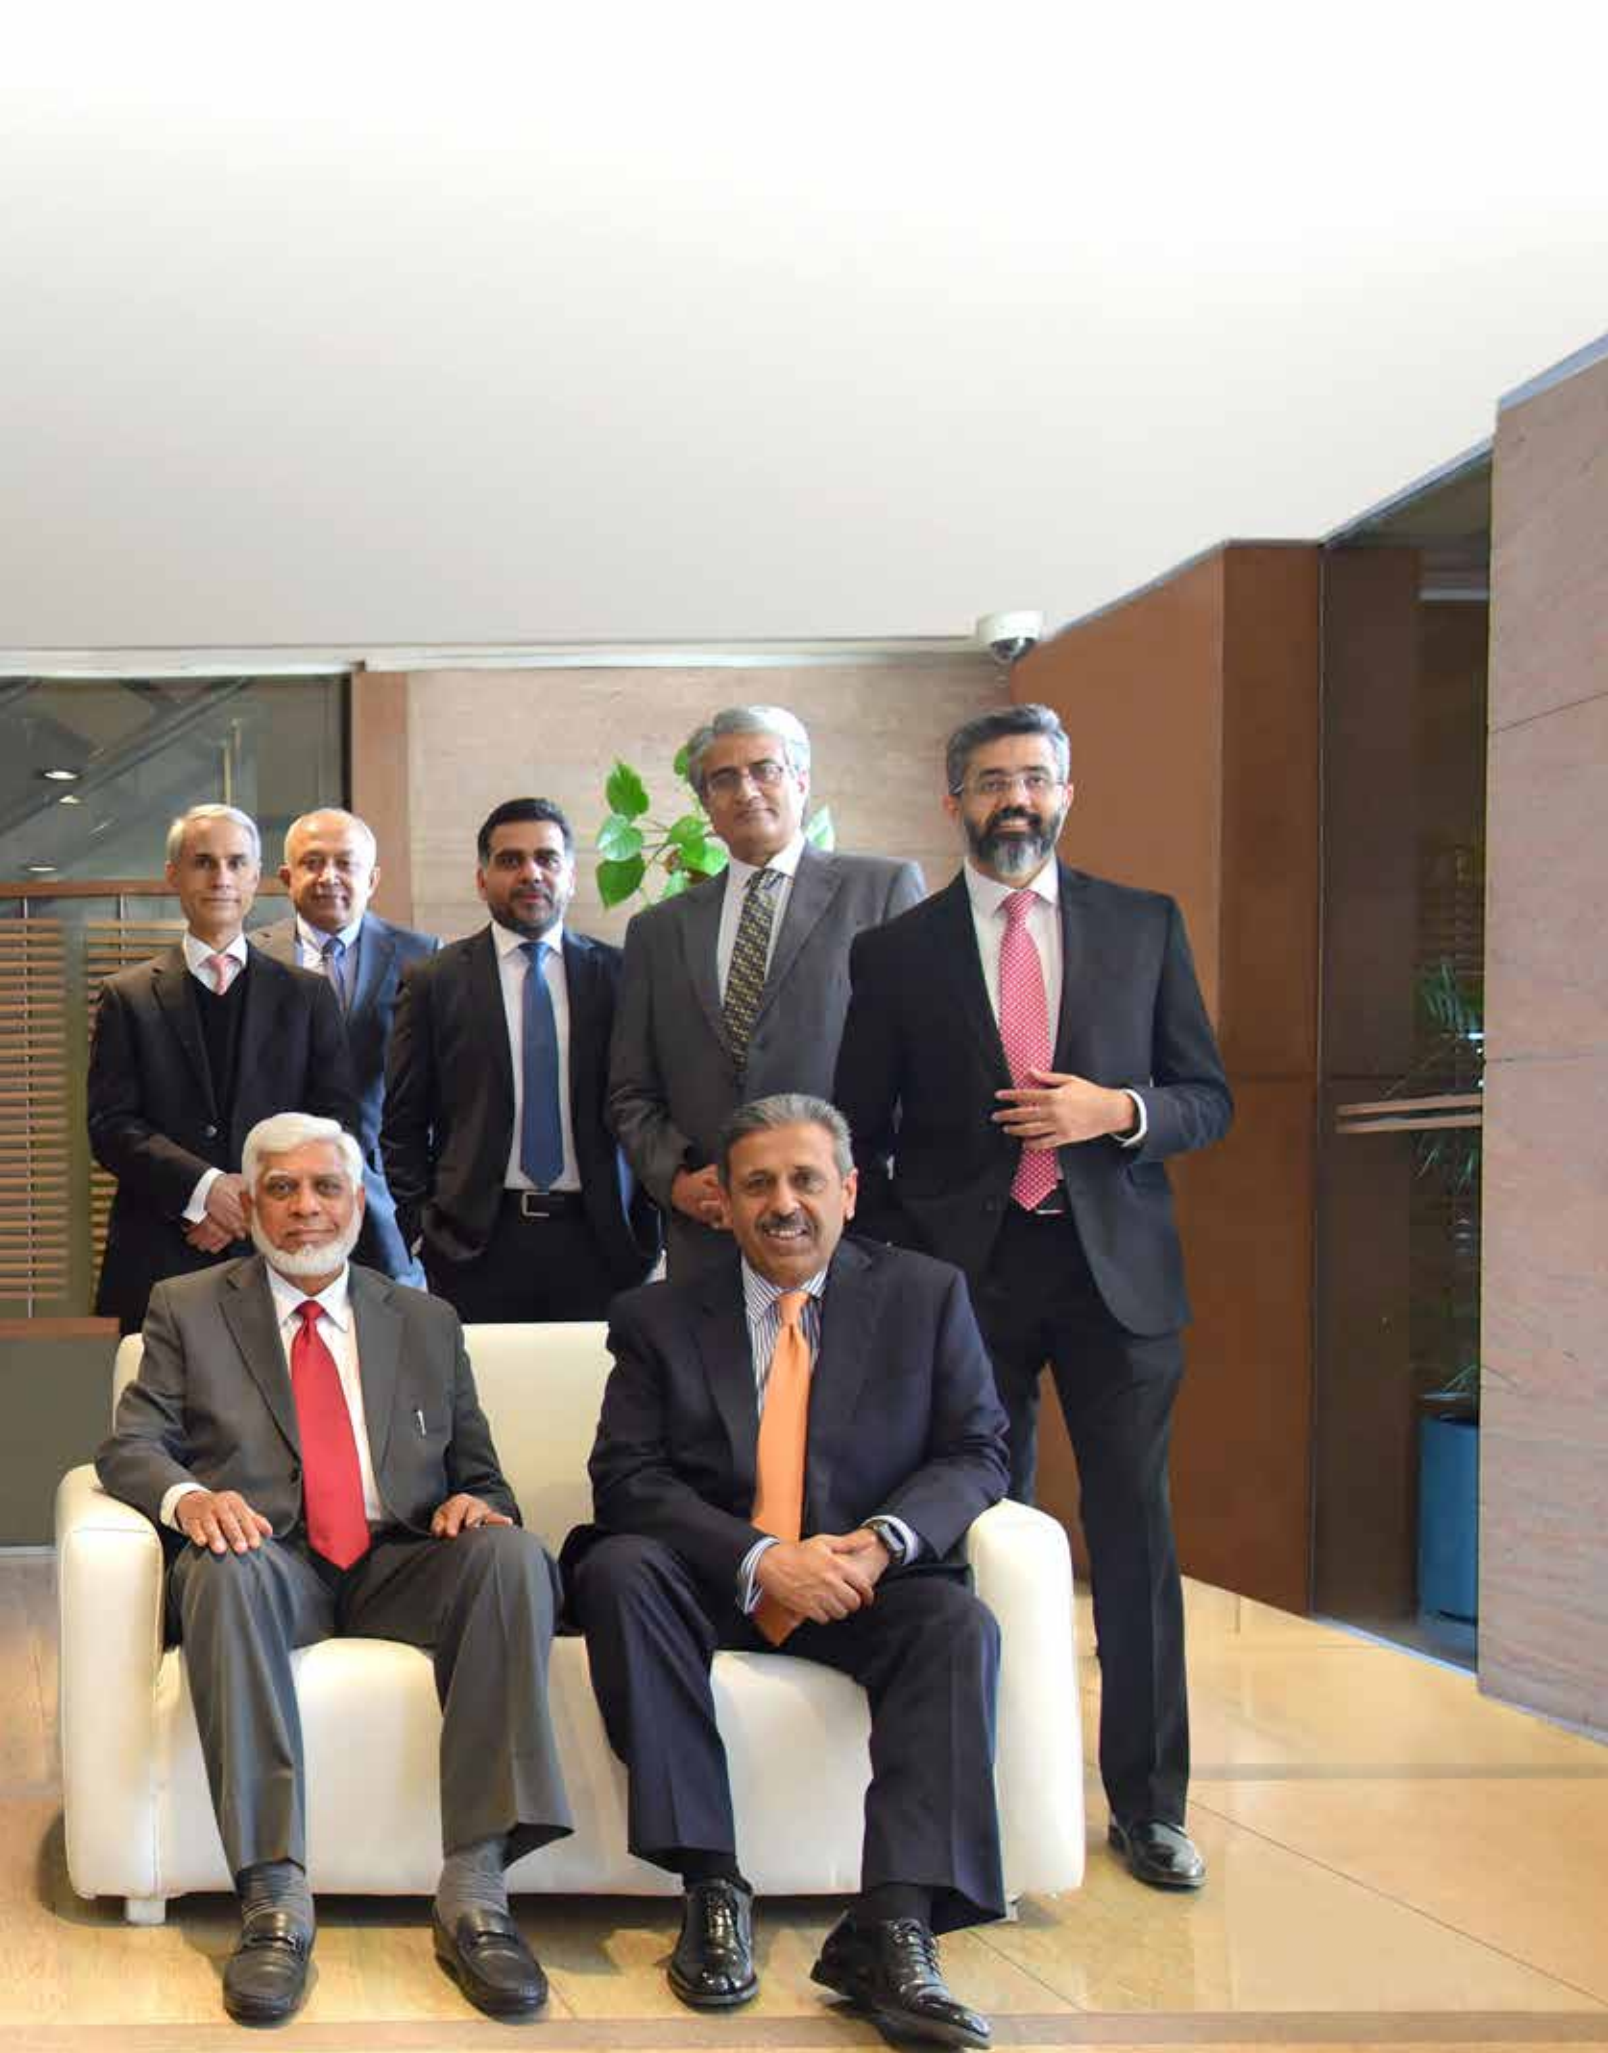

Standing L to R: Muhammed Nauman Chughtai, Salman Y. Zaidi, Hammad Khalid, Zargham Khan Durrani, Kamran Zaffar Muggo,  
Sitting L to R: Malik Abdul Waheed, Shoab Mumtaz

# Other Senior **Management**

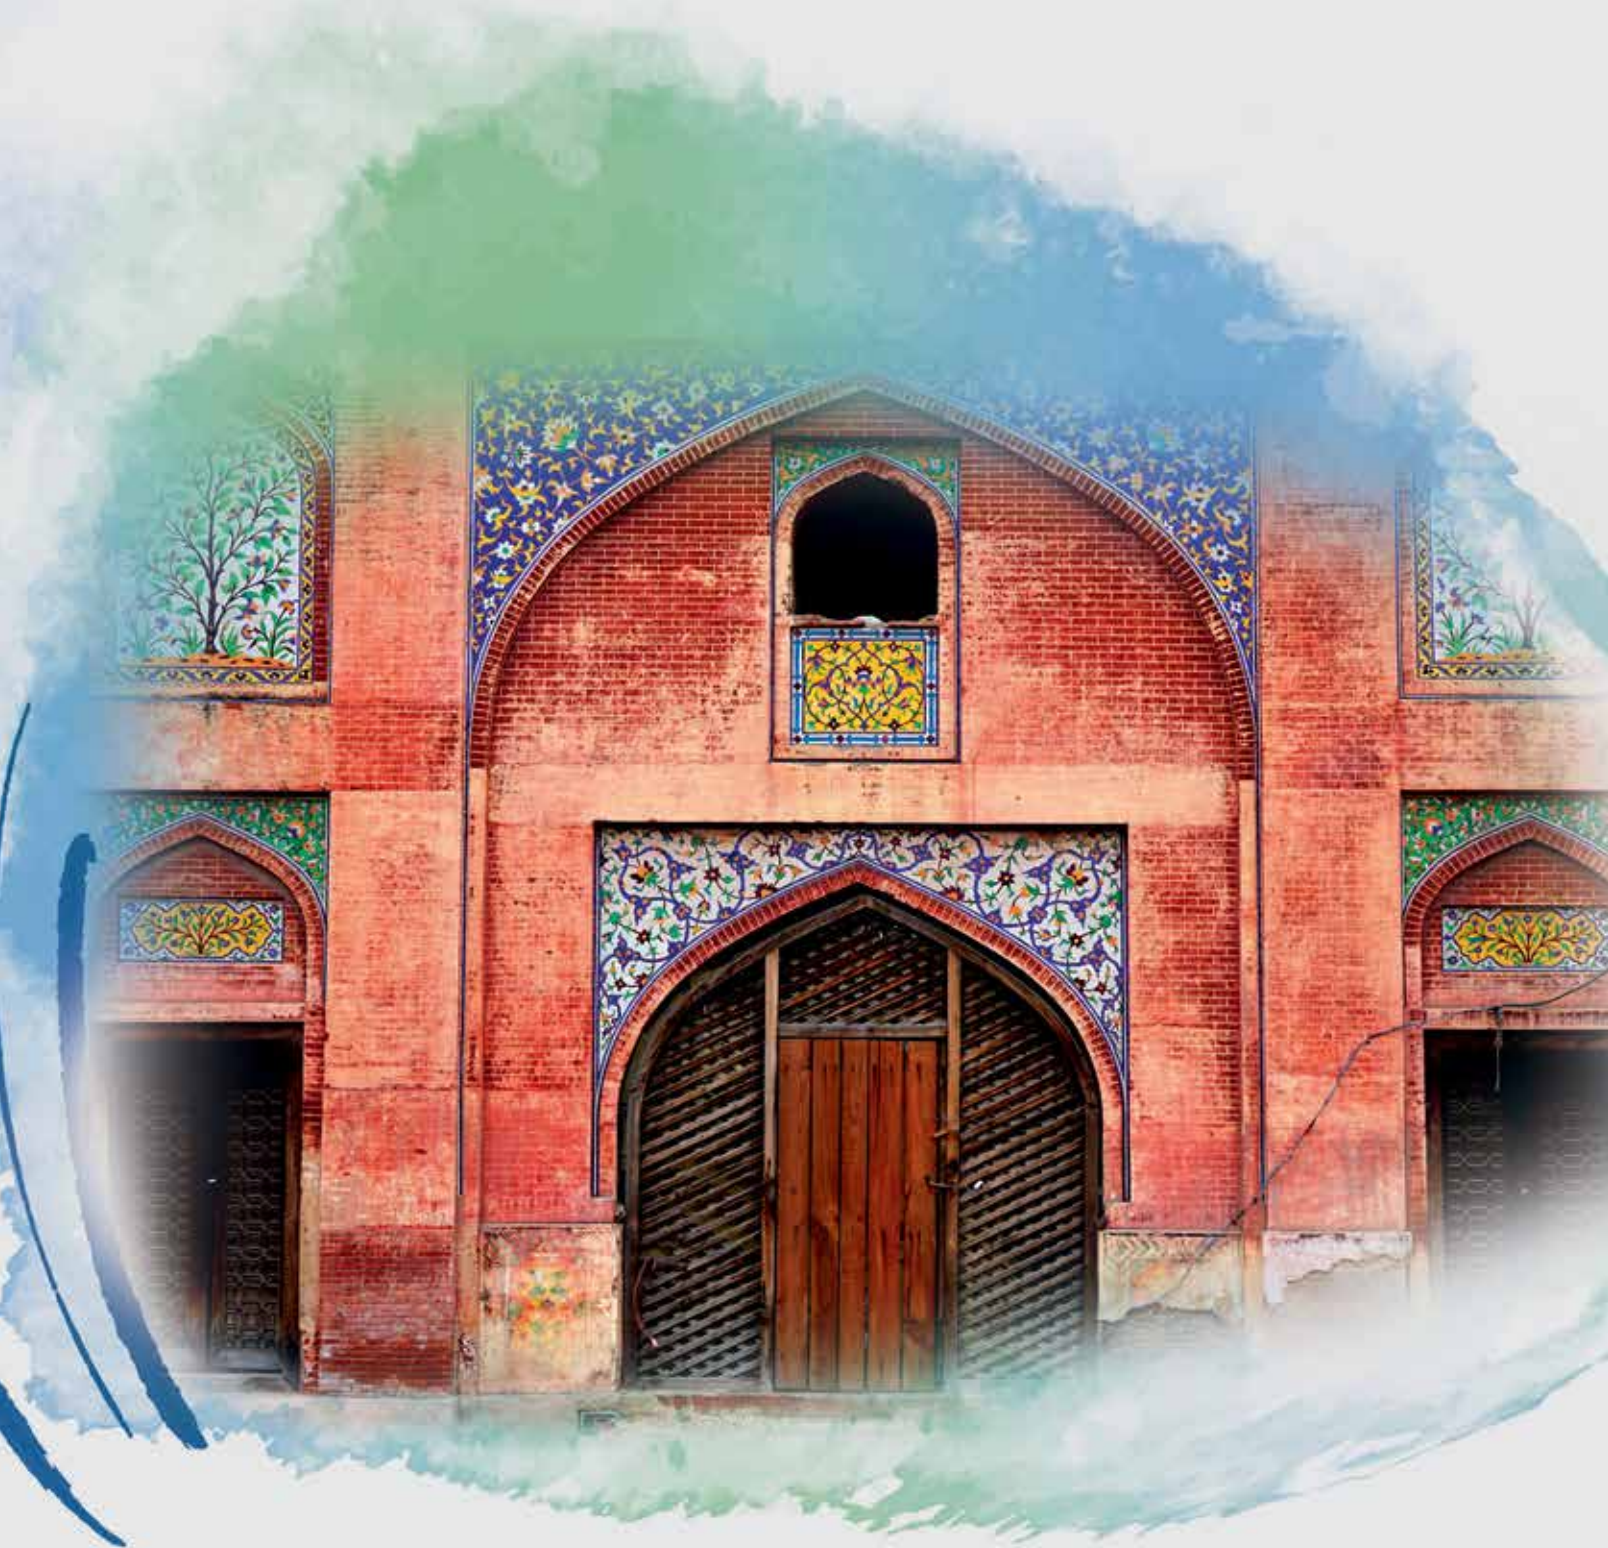



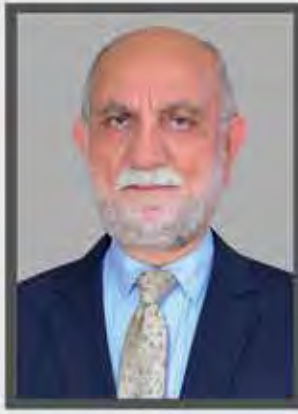

**Fida Ali Mirza**  
Company Secretary

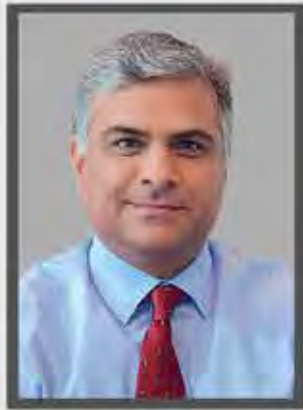

**Aamir Khanzada**  
Country Manager, Bahrain

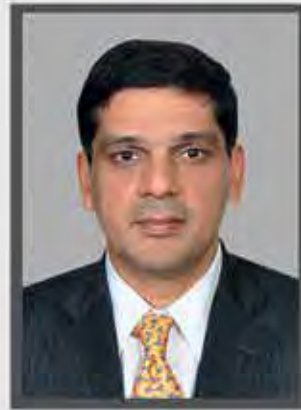

**Aali Shafi**  
Country General Manager, Sri Lanka

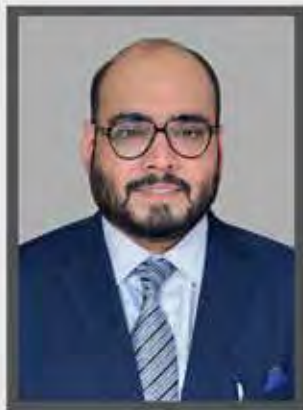

**Muhammad Farooq Wasi**  
Group Head Audit

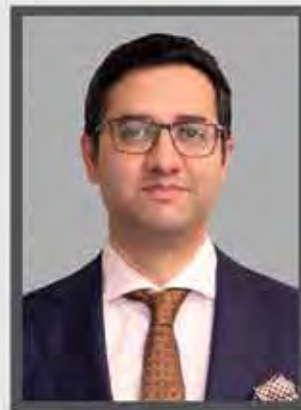

**Omair Safdar**  
Head Capital Markets

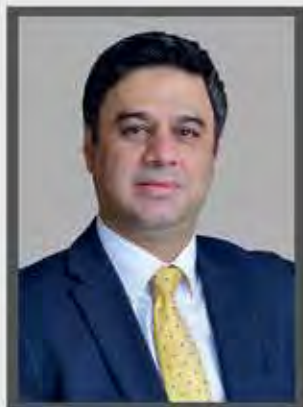

**Muhammad Ali**  
Division Head  
SAM - Consumer & Retail

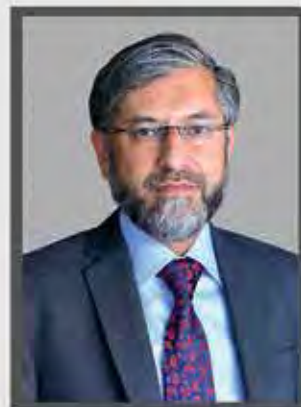

**Muhammad Haris Hasan**  
Division Head  
SAM - Corporate & Commercial

# Entity Credit Rating

Long Term

**AAA**

Short Term

**A1+**

# Corporate Profile of the Bank

MCB Bank is one of the oldest banks of Pakistan, incorporated in private sector in 1947. It was nationalized in 1974 and privatized in 1991. MCB Bank's major shareholding is owned by Nishat group a prominent business conglomerate, having diversified interests in Textiles, Cement, Banking, Insurance, Power Generation, Hotel Business, Agriculture, Dairy, Auto Manufacturing and Paper Products. To enter in international capital markets, the Bank launched its Global Depositary Receipts (GDRs) in 2006. It was the first Pakistani Bank that got its GDRs listed on the London Stock Exchange. In 2008, the Bank entered into a strategic partnership with Maybank, Malaysia, which owns 18.78% stake in MCB through Maybank International Trust (Labuan) Berhad. In 2017, Fullerton Financial Holdings (International) of Singapore through Bugis Investments (Mauritius) Pte Ltd acquired 5.49% stake in MCB under merger scheme of NIB Bank with and into MCB Bank Limited. MCB is the first Pakistani Bank which incorporated a wholly owned Islamic Banking subsidiary, MCB Islamic Bank Limited, to meet requirements of a significant segment of society for financial solutions that conform to Shari'ah rulings and demonstrate our confidence in the potential of the Islamic Banking industry in the country.

The Bank operates a strong and vast network of over 1,400 Branches and over 1,400 ATMs in Pakistan and 11 branches overseas with a footprint in UAE, Bahrain and Sri Lanka. With a customer base of over 7 million, MCB leads the banking & financial services sector in Pakistan and customers across the globe have 24/7 access to MCB Bank via our World Class Internet Banking. The Bank on consolidated basis is operating the 2nd largest network of more than 1,600 branches in Pakistan. The Bank enjoys highest local credit ratings of AAA / A1+ categories for long term and short term respectively, based on PACRA notification dated June 26, 2020.

## Subsidiaries

### MCB Islamic Bank Limited

Holding: 100%

Profile: Objective of the Bank is to carry on Islamic Banking Business in Pakistan in accordance and in conformity with the principles of Islamic Shari'ah and in accordance with regulations and guidelines of the State Bank of Pakistan.

### MCB - Arif Habib Savings & Investments Limited

Holding: 51.33%

Profile: Asset management, investment advisory, portfolio management, equity research and underwriting.

### MCB Non-Bank Credit Organization Closed Joint Stock Company

Holding: 99.94%

Profile: It leases various types of industrial equipment, public transports, real estate and retail auto.

### Financial & Management Services Pvt. Limited

Holding: 95.90%

Profile: The Company is in dormant status and transferred to MCB from Ex. NIB under merger scheme. The Bank's investment in the company is fully provided.

## Associates

With reference to significant holding, the following entities are associates of the Bank:

### Adamjee Insurance Company Limited

Holding: 20%

Profile: The Company is engaged in the general insurance business.

### Euronet Pakistan (Private) Limited

Holding: 30%

Profile: To provide outsourcing services to banks and financial institutions for Automated Teller Machine (ATM) network and managed services for Point of Sales (POS) terminal networks.

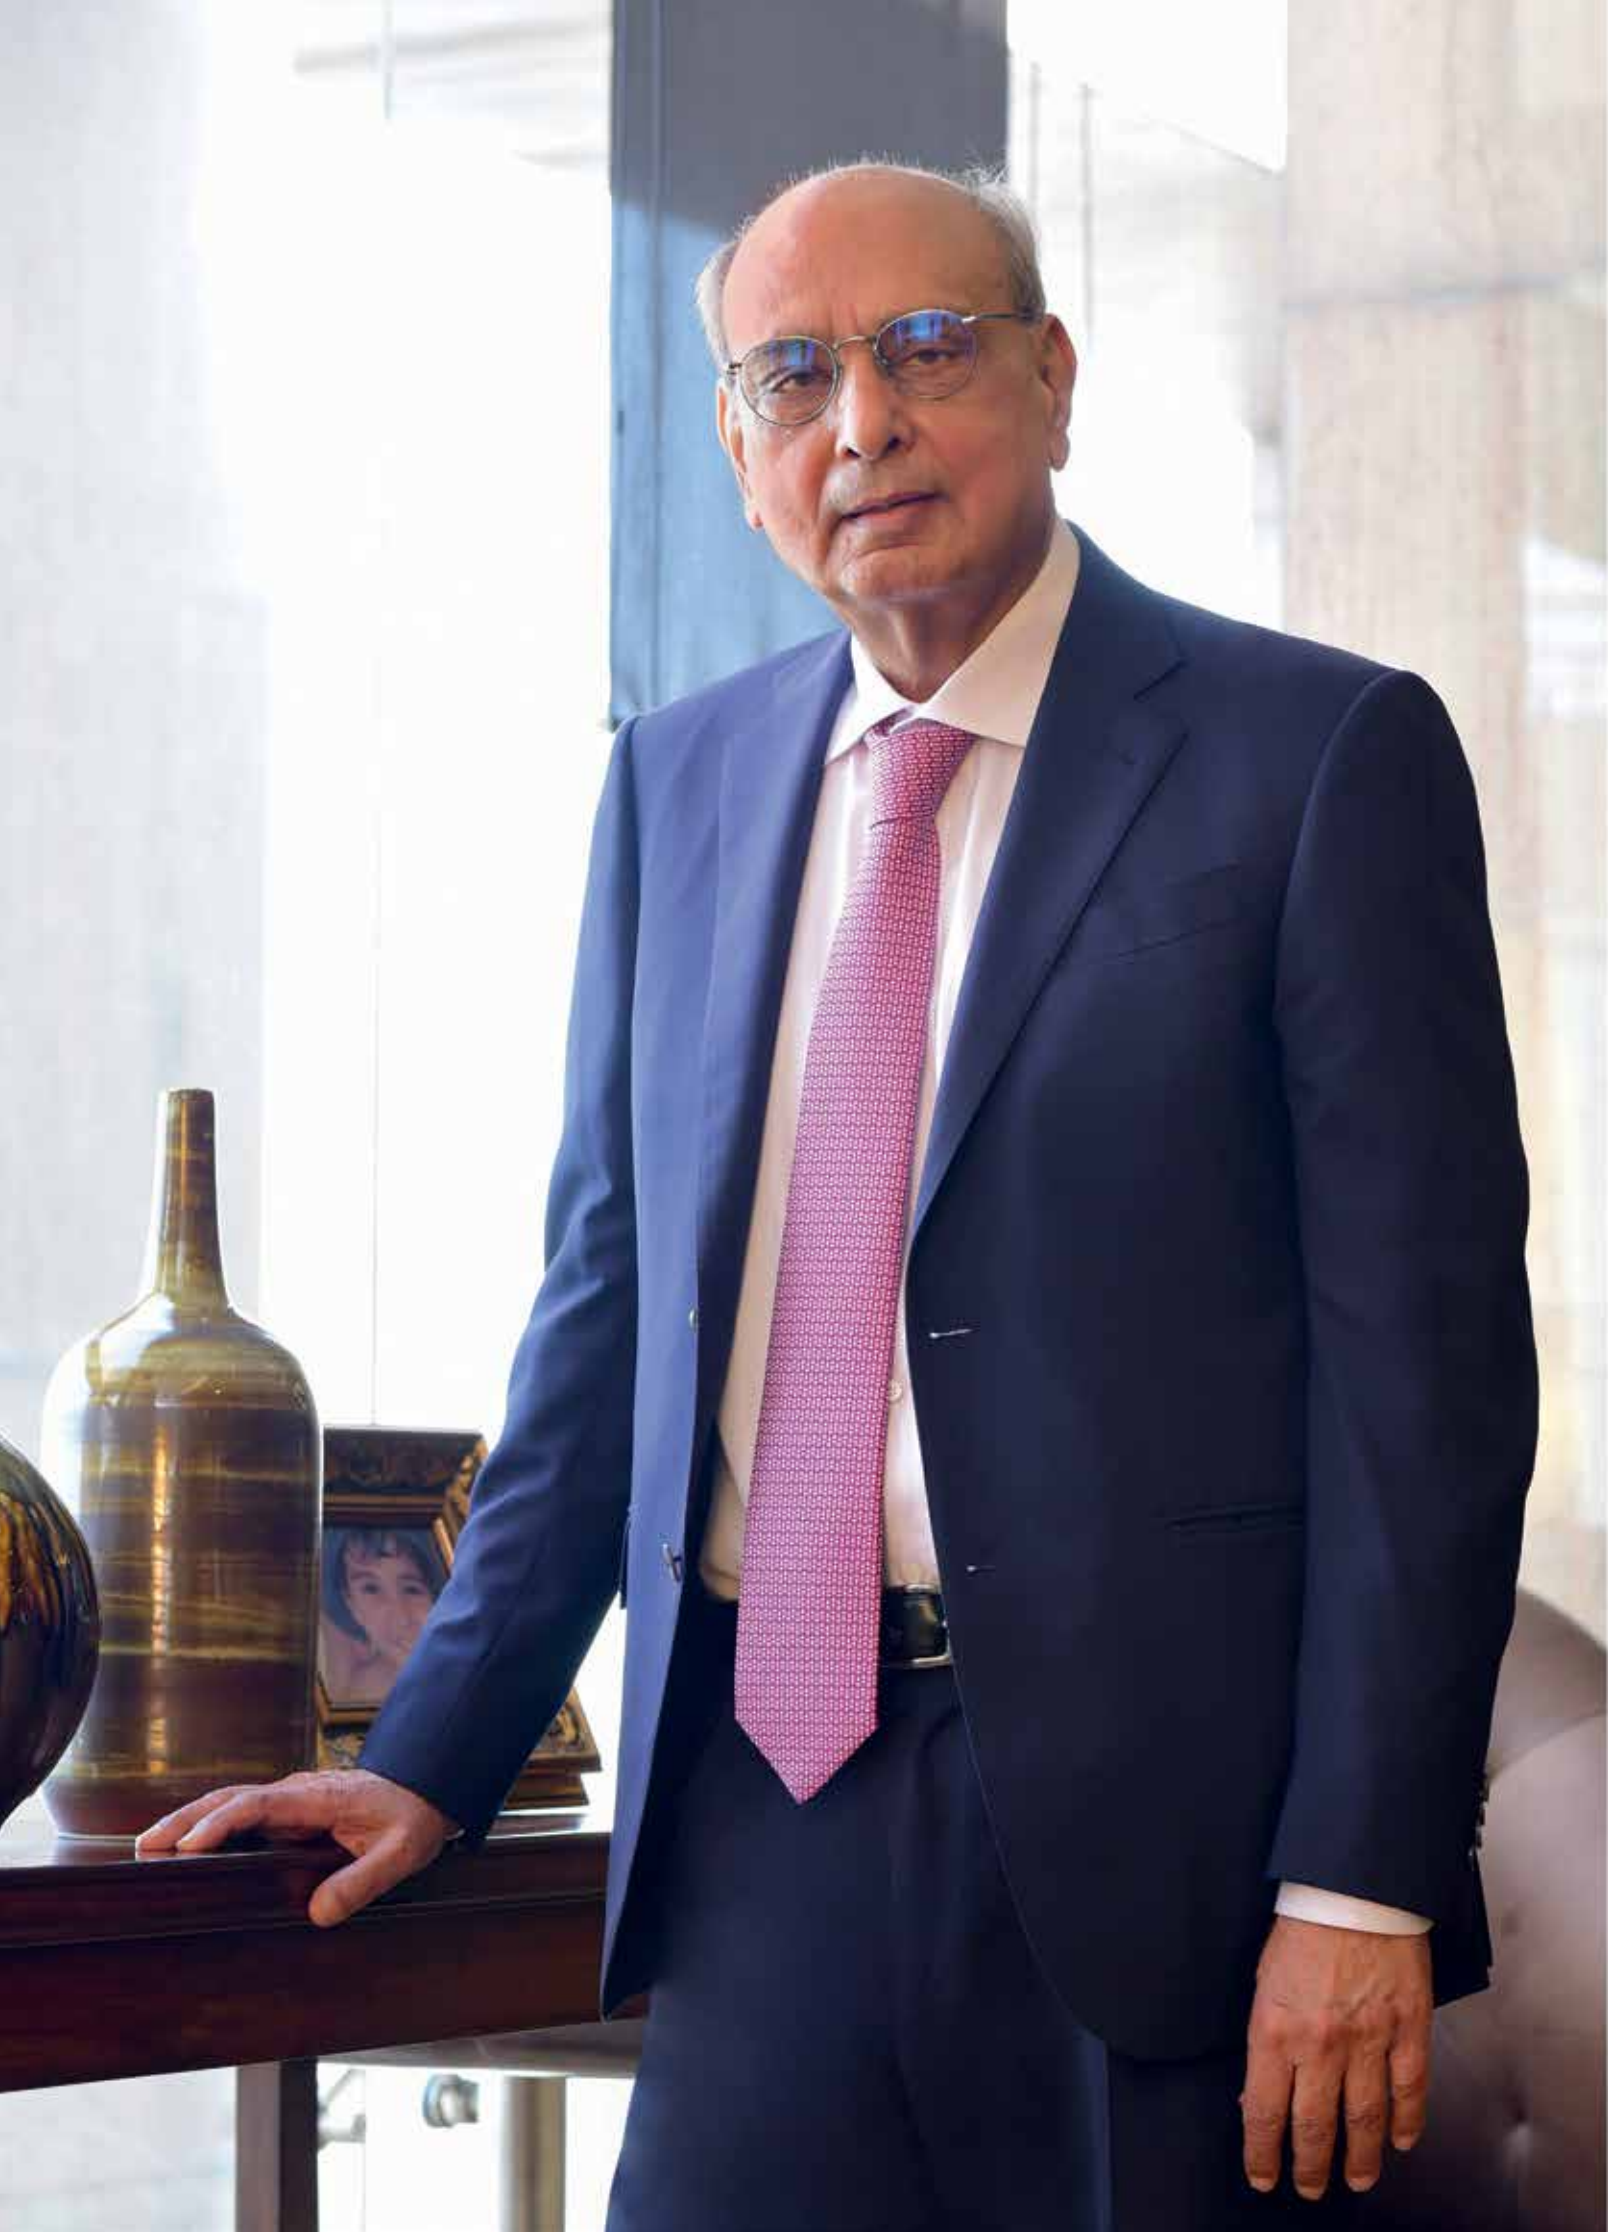

# Chairman's Review

I am pleased to present this report to the shareholders of MCB Bank Limited on the overall performance of the Board of Directors and effectiveness of the role played by the Board in achieving Bank's strategic objectives.

The Board set the Bank's strategic aims to uphold our vision, mission and core values. It exhibited high standards of business and professional conduct in managing and supervising affairs of the Bank. During the year, the Board performed an in-house performance evaluation of the Board as a whole, its Committees, the Chairman, the President & CEO and Individual Directors. Last year, such performance evaluation was made by M/s Pakistan Institute of Corporate Governance ("PICG") as an external independent evaluator.

The overall rating of the Board is highly encouraging, particularly in respect to its composition, expertise, effective risk management, adequate system of internal controls and audit function. The Board has always focused on the preservation of the interests of Bank Shareholders and has strived to maintain a balance between regulatory obligations and operational requirements. As part of this effort, the Board's properly structured Committees are in place, with each one having well-defined objectives and appropriate Terms of Reference; performing their respective roles effectively and efficiently.

The past year has been difficult in both national and international contexts due to the effects of the Coronavirus pandemic. As in many other countries around the world, Pakistan's economy has also experienced limitations to growth. Under the Board's strategic advice and direction, the Bank's management followed a pragmatic approach to steer the Bank through uncertainty. The Bank has played its role in the fight against Coronavirus pandemic with targeted donations in the healthcare sector, such as the donation of protective equipment for frontline health workers to the Government of Punjab and the timely provision of rations to needy families affected by the COVID-19 lockdown. In such difficult circumstances, the MCB Bank team has shown resilience and fortitude.

We have consolidated avenues for growth and efficiency. The Bank has kept a close eye on identifying opportunities that promote cross-functional synergies and minimize costs. The Bank has recorded highest ever profit in 2020. MCB Bank has promoted the use of digital banking channels to reduce customer branch visits in the interest of public health. In partnership with our industry regulators, our Bank has successfully helped propagate the Roshan Digital Account initiative aimed at overseas Pakistanis to boost the volume of inward remittances and reduce the use of informal channels. These efforts have borne fruit in ensuring the profitability of the Bank and encouraged the inflow of much needed foreign exchange to our economy. It is self-evident that the positive trajectory of the Bank would not have been possible without the dedication and hard work of our employees. The Bank has always promoted cultivation of talent from within the organization and it is noteworthy that much of the Bank's senior management has ascended from the ranks in line with their commitment to our shared vision. Their valuable contributions have been central to taking the organization to the next level.

**Mian Mohammad Mansha**

Chairman

MCB Bank Limited

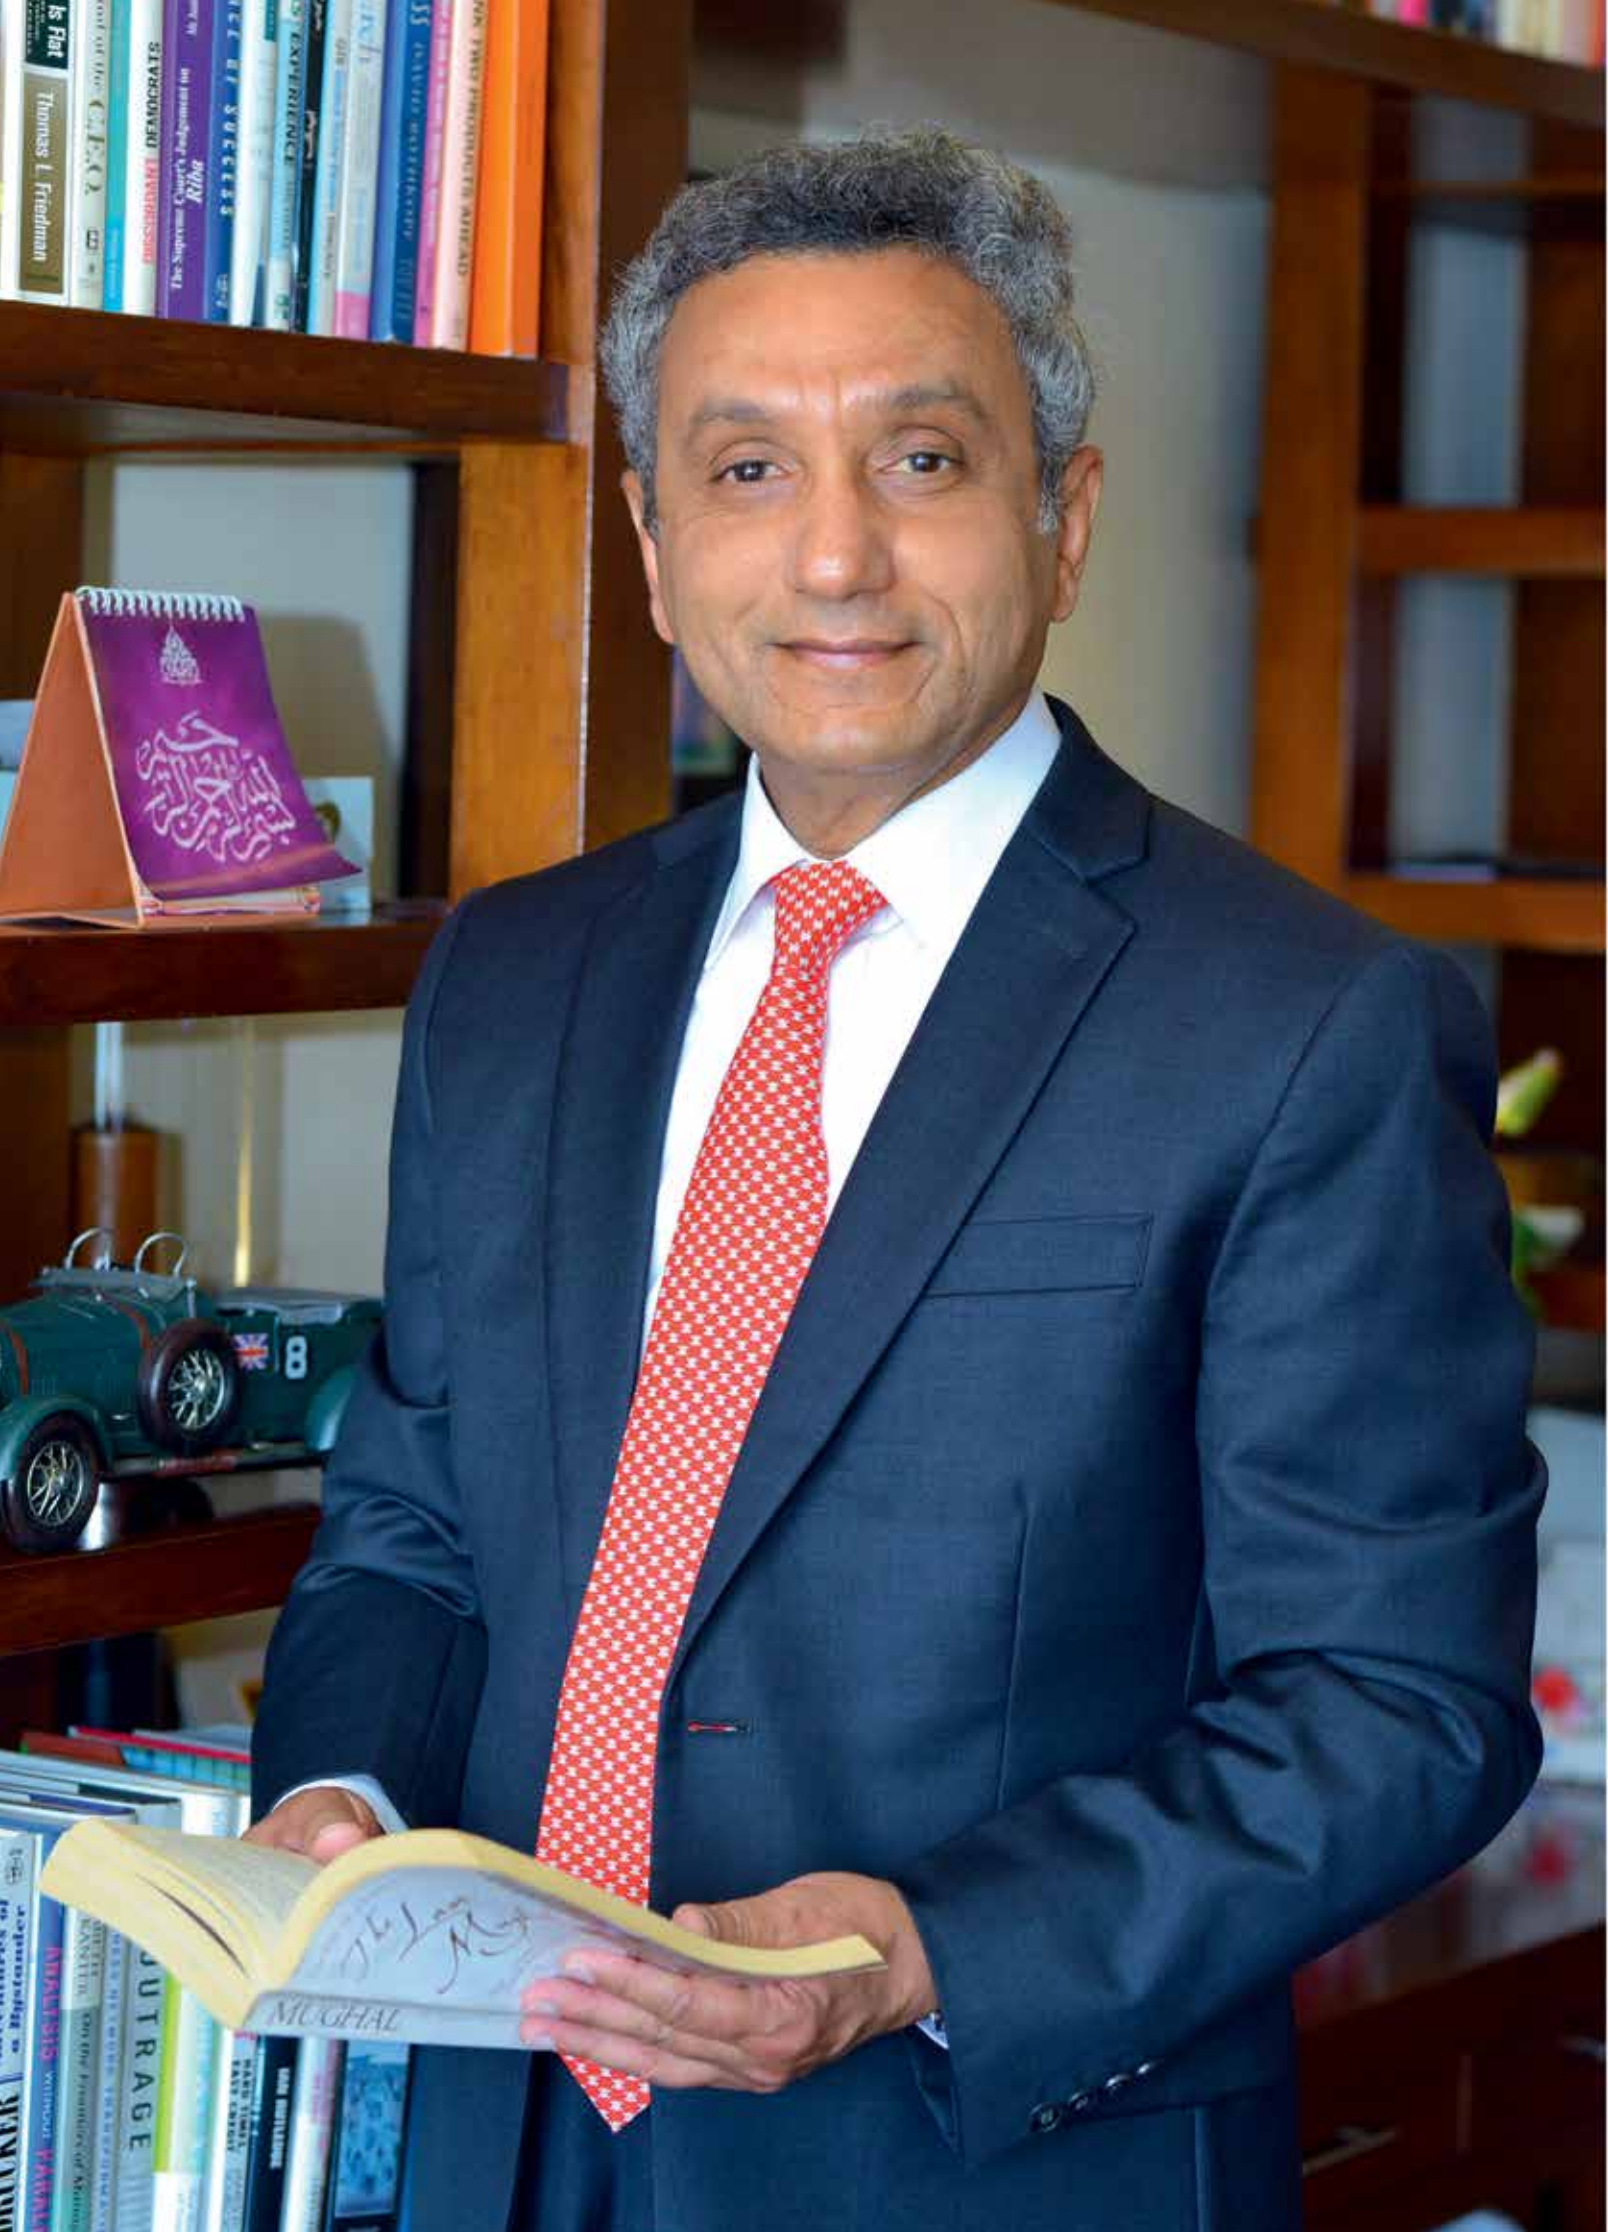

# President's Review

The world around us changed significantly in 2020 due to the COVID-19 pandemic and heightened business instability that resulted in a record drop in interest rates. Despite many challenges presented by the pandemic, MCB team performed remarkably to support our valued customers and deliver a solid financial performance in unprecedented times.

MCB Bank reported its highest ever Profit Before Tax of Rs. 48.25 Billion (+20.3%) and declared a 200% cash dividend for the year 2020 despite extremely restrictive challenges posed by COVID-19 pandemic. Assets of the Bank grew by 15.99% over last year and stretched to Rs. 1.76 trillion. Sizeable growth in current deposits, timely shift in maturity profiling of investments and favorable re-pricing lag enabled the Bank to increase its net interest income by 19.7% to Rs. 71.33 billion, improving Return on Assets (ROA) and Return on Equity (ROE) to 1.77% and 18.88%, respectively. In comparison with last year Non-Fund Based income registered a considerable growth of 9%.

In spite of the challenges posed by low interest rate environment, we managed to achieve excellent growth in our deposit base, which demonstrates the loyalty of our customers, earned through providing quality service. Growth in deposits was of Rs. 144.7 Billion (12.6%) against last year, with increased Current Account-Savings Account (CASA) concentration of 93% as of December 31, 2020.

Despite sustained inflationary pressures, the Bank's strategic focus of balancing short term tactical cost reductions with long term cost initiatives has assisted in containing growth in administrative expenses; in turn registering a decline of Rs. 129 million during the year. Thus the cost to income ratio of the Bank significantly improved to 36.87% from 43.4% reported last year. In anticipation that customers affected by the pandemic might require provisioning once SBP's relaxations and waivers expire in 2021, the management has exercised prudence and booked a general provision of Rs. 4.0 billion during the year under review, hence providing insulation and loss absorption capacity against any risks to asset quality.

While complying with the regulatory capital requirements, the Bank's total Capital Adequacy Ratio (CAR) is 20.98% against the requirement of 11.50% (including capital conservation buffer of 1.50% as reduced under BPRD Circular Letter No. 12 of 2020). Quality of the capital is evident from Bank's Common Equity Tier-1 (CET1) to total risk weighted assets ratio which comes to 17.03% against the requirement of 6.00%. Bank's capitalization also resulted in a Leverage Ratio of 7.03% which is well above the regulatory limit of 3.0%. The Bank reported Liquidity Coverage Ratio (LCR) of 237.72% and Net Stable Funding Ratio (NSFR) of 174.86% against requirement of 100%.

MCB actively participated in State Bank of Pakistan's policy measures to support the economy during COVID-19, by offering loan deferment and/or loan rescheduling, offering liquidity in Rozgar Scheme and partnered with the Central Bank in extending concessionary "Temporary Economic Refinance Facility" (TERF) to facilitate investment in new industrial projects, as well as, capacity expansion.

MCB Bank is proud to be one of the leading banks that offered the SBP mandated Roshan Digital Account, a digital banking solution for Non-Resident Pakistanis (NRPs) and Resident Pakistanis with declared foreign assets. Banking industry is undergoing significant transformation which has been facilitated through digitization of banking services and propulsion of e-Banking and e-Commerce. Progress in this rapidly evolving environment lies in cross-industry collaboration, cash minimization and digitization. We are determined to increase the pace at which we digitize MCB through greater investments in technology. Our Digital Banking team's proactive and innovative initiatives have created industry wide impact and have elevated MCB Bank and its digital offerings to emerge as a strong force in the payment industry, all translating into strong customer relationships. The bank witnessed a substantial increase in Mobile Banking transactions during 2020. With a cumulative number of 500,000+ App downloads, the business is geared up to explore new possibilities along different verticals. During the year, we welcomed more than 500,000 new customers, raising our customer base to 8.2 million accounts, which effectively demonstrates our customers' trust in MCB. We offered accessible banking infrastructure for differently-abled persons to support equitable access to banking and financial services. We also performed well in our Consumer Lending and Wealth Management businesses. Consumer lending book size at the end of year 2020 was over Rs. 28 billion, serving over 134,000+ customers across all lending products. 13,944 credit cards were issued during the year while 5,549 auto loans were disbursed in 2020. A key highlight of Consumer Banking strategy was our joining national drive on providing low cost housing facility to masses. Specifically, we aligned our organizational direction and added substantial resources to drive Government's Markup Subsidy Scheme for Housing Finance, as we aim to continue building our efforts on this front. Likewise our Investment Services and Bancassurance registered fresh sales of Rs. 5.7 billion and Rs. 2.6 billion, respectively.

Our commitment to improve our conduct and controls is factored into every strategic and operational decision we make. We remain on the front line in the fight against financial crime and take this responsibility most seriously. Every activity of MCB Bank passes through a compliance filter which serves as the backbone of the institution for regulatory compliance.

Compensation and benefits are our largest expense that accounts for almost half of all administrative expenses; reflecting our sincerity and commitment to recognizing the performance of our hardworking and professional human resource capital. At MCB we are building an inclusive organization to address the gender gap and allow everyone an opportunity to fulfill their career aspirations and professional goals. We set clear compelling directions, engage employees to Bank's vision, ensure open and honest communication and recognize high performance to retain and attract best talent in the market. During the year, employees' development and trainings remained our foremost priority as our committed and professional team is our strategic advantage.

We continued to explore investment opportunities within and outside Pakistan in order to further expand our local as well as international footprint and strengthen our outreach beyond our existing network. We believe that there are significant opportunities for MCB in the medium to long term across its footprint. Our strategic focus helped increase customer confidence as MCB Home Remittances volume surged to Rs. 519 billion with an impressive growth of 13.8% over last year. MCB Cash Management crossed the annual volume milestone of Rs. 2.0 trillion in 2020 and remains one of the leading Banks in corporate cash management.

Our efforts to improve internal operational environment of MCB Bank were rightly recognized at different forums. The strength of our Bank was also reassured by the Pakistan Credit Rating Agency (PACRA), which maintained MCB's credit ratings at AAA [Triple A] for long term and A1+ [A one plus] for short term. Our performance was acknowledged by various local and international entities. Asiamoney declared MCB as the "Overall Most Outstanding Company in Pakistan 2020" while for the eighth consecutive year, the joint committee of Institute of Chartered Accountants of Pakistan & Institute of Cost and Management Accountants of Pakistan (ICAP/ICMAP) awarded the "Best Corporate Report" award in Financial Sector category to MCB's annual report for 2019. These and many other awards encourage us to pursue the strategies that have served us and our stakeholders well throughout.

For 2021 outlook, we are cautiously optimistic for the year ahead. On COVID-19 pandemic front, development of multiple vaccines and their gradual roll-out have created hope of healthy recovery during 2021. In MCB Bank, we're all focused on how to best protect and support our employees, customers, families and communities in 2021 & beyond.

Our pride is not in our numerous landmark buildings spread across the country but is in the millions of relationships we have forged over generations with customers, team members and shareholders. Our Capital strength and earnings power are as strong as they have ever been. Challenges still exist, and there's always room for improvement. As we head into 2021, we remain committed to serving our customers, colleagues and shareholders while being steadfast in our compliance with regulations.

Finally, I would like to acknowledge the hard work and dedication of all staff members of MCB, who are undoubtedly the core asset of our Bank. We are fortunate to have a diverse group of qualified, trained and dedicated employees across Pakistan who view MCB Bank as a great institution to begin, build and sustain their careers.

I am also greatly indebted to the guidance of the Chairman, Board of Directors, our foreign partners and the staff members who helped in making 2020 yet another profitable year.

In closing, I feel humbled to be given the opportunity to not only represent one of the leading banks of Pakistan but to also be a member of this team. With our energy, team work, unity of purpose and faith in GOD, we will continue to operate as "One Bank One Team" to meet the high expectations of our shareholders, customers, employees and regulators in coming years.

**Imran Maqbool**  
President & CEO  
MCB Bank Limited



# Highlights 2020

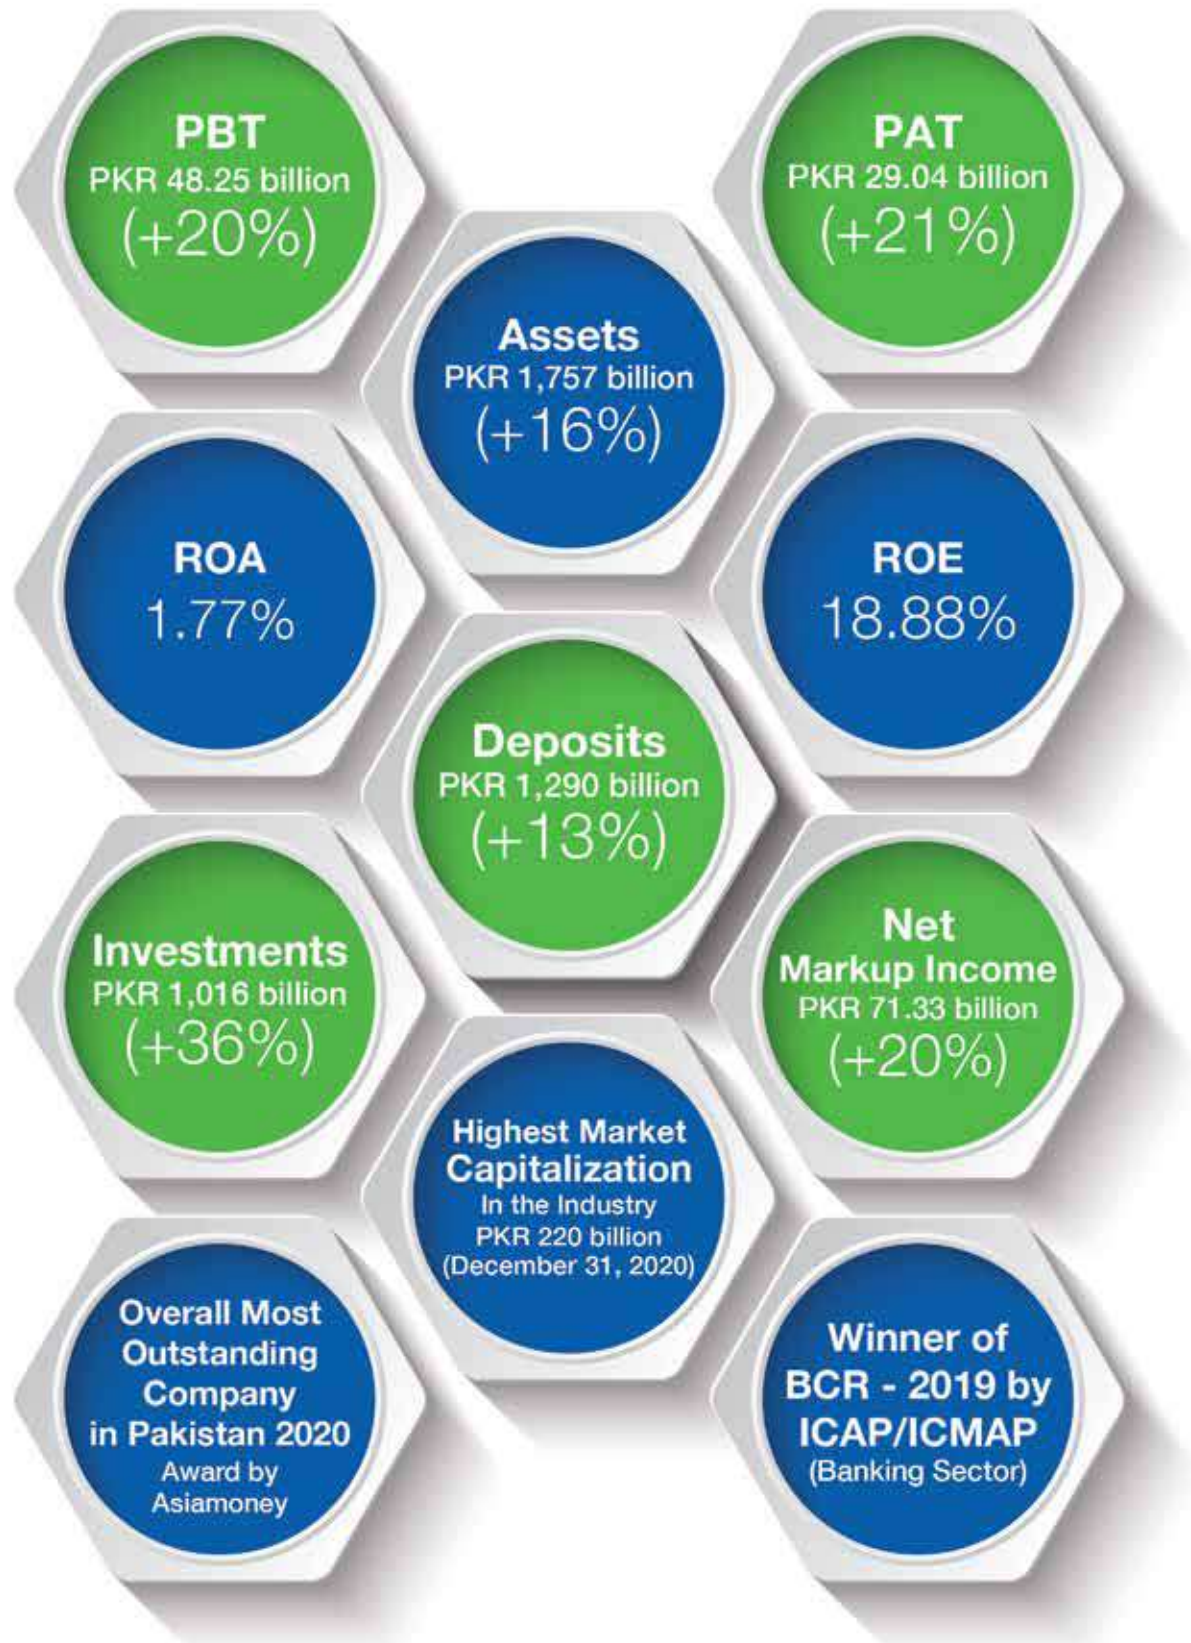

# Financial Performance 2010 - 2020

10 Years Trend - Rupees in Billion

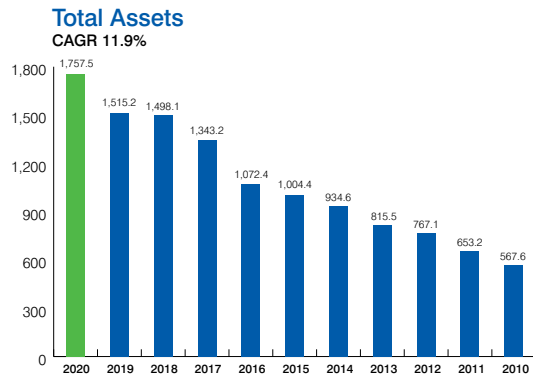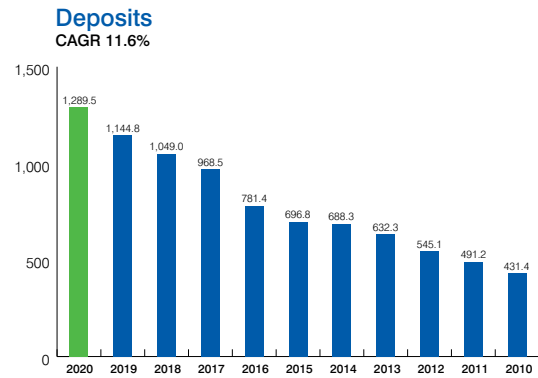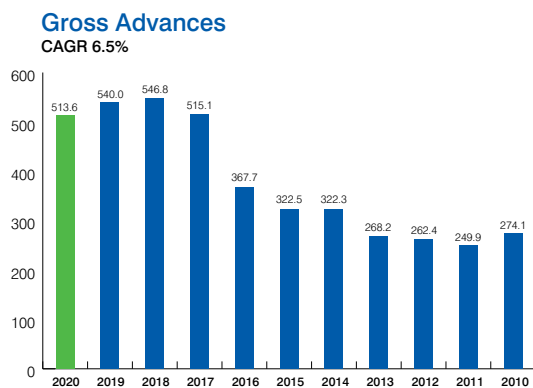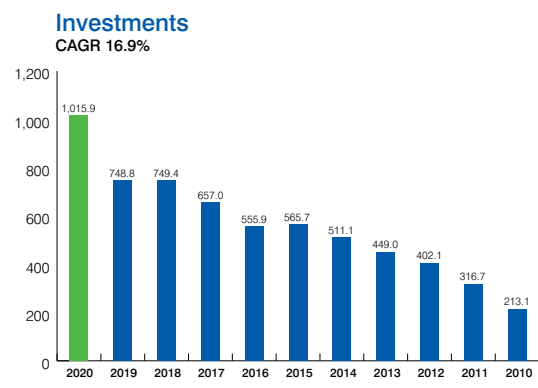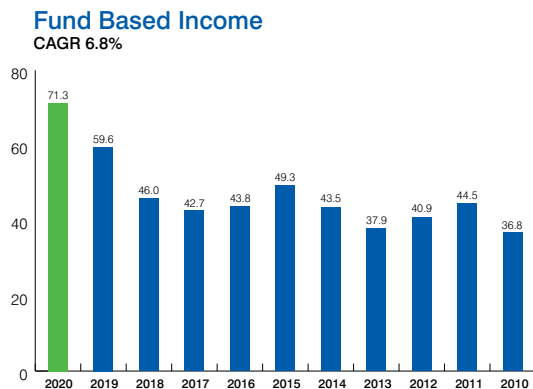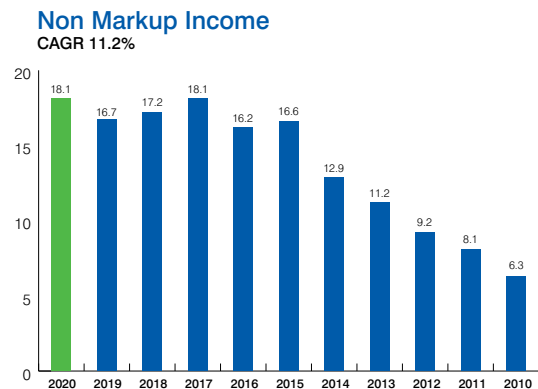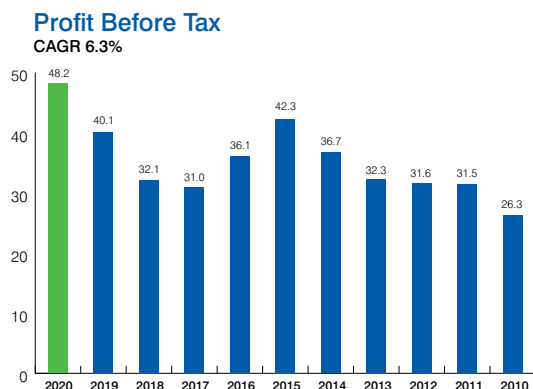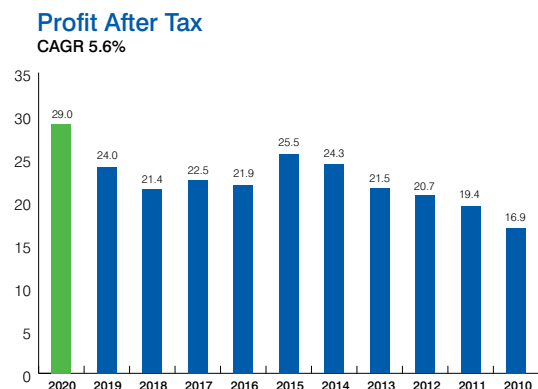

## Forward Looking Statement

The Annual Report of MCB Bank Limited carries forward looking statements in its different sections. Since there are uncertainties related to the occurrence of future events, these should be read in conjunction for decision making by the users of the Annual Report. Forward looking statements contain words such as expect, anticipate, believe, seek, will, may, would, presume, assure, hope, so on and so forth. A forward-looking statement naturally addresses matters that are, to certain degrees, uncertain and may not happen. In most cases, a forward-looking statement is made in respect of Bank's expected income, earnings, business growth, horizontal expansion, cost structure, capital structure, dividends etc.

### Pakistan's Economic Outlook

Timely measures taken by the government to curtail the spread of novel COVID-19 outbreak and to support the economy has made the outlook for 2021 less challenging. Amidst a subdued forecast for GDP growth, the government faces the challenge of stimulating the economic activity without significantly increasing the inflationary pressures.

Moreover, all eyes are currently focused on the re-initiation of the IMF Program which was stalled when the Covid-19 pandemic hit the country. The IMF Program bodes well for international confidence in Pakistan and adds to the government's capability to tap international markets. In addition, it also holds significance on account of the follow through impact it has on fiscal management, especially through the elimination of subsidies and inefficiencies. Hence, any positive outcome of the negotiations with IMF will lead to the betterment of the economy.

### MCB's Future Outlook

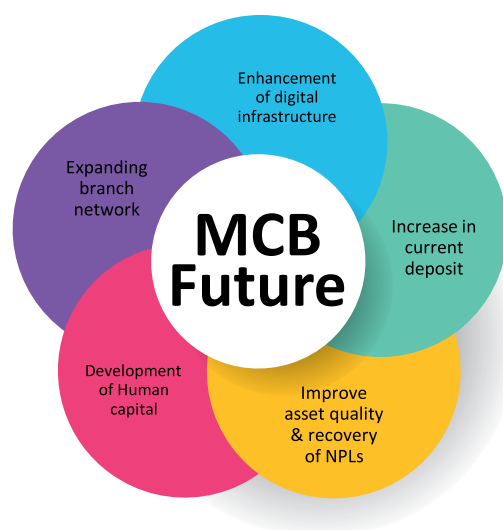

Pakistan's banking sector will continue to navigate through the tough economic situation in the year 2021 on account of falling earning margins due to current policy rate regime and compounding risks to the asset quality given a subdued outlook for business activity and uncertainty surrounding the COVID-19 outbreak. Considering the existing disruptions, complexities and uncertainties, the socio-economic and regulatory landscape will continue to transform rapidly; hence, further exacerbating the challenges surrounding the operating environment.

Irrespective of the above captioned challenges, the Bank will strive hard to deliver results for its stakeholders in 2021. The Bank's strategic plan, centered on the key pillars of customer centricity, geographical expansion, technology and cyber security and people development (among others), takes into consideration the evolving operating and economic scenario and paves Bank's future road map.

The widespread norms to contain the spread of COVID-19, including social distancing and limiting the size of gatherings, is expected to fundamentally alter the consumer behavior of banking customers. At MCB, our proactive stance to further augment branch outreach while sustaining parallel focus on creating safe and secure digital and alternative banking channels shall hold us in good stead as the customers increasingly look to access non-physical banking modes.

We would continue to improve our asset quality, increase low cost deposit base, inculcate operational efficiencies and increase contribution from the non-markup segment through materialization of cross sell business opportunities with corporate clients.

Credit appetite being a mainstream business line of the Bank, instigates us to avail all righteous credit extension opportunities that fall within the defined risk appetite of the institution; while proactively monitoring watch listed portfolio of the bank to minimize any further infection and ensure that recoveries are made in line with the agreements.

On the investments side, the Bank is committed to optimally manage excess liquidity through strategic re-profiling of the investment book in an evolving yield curve scenario.

We would continue to lead the market position through focused initiatives targeting new products, new markets, branchless banking and effective cost management. The Bank is investing in developing a workforce for the 'Digital Banking Age' by attracting and retaining the right skillset and competence; hence, aligning it with the evolving business dynamics.

Driving customer centricity remains a key area of focus for the next year; we will direct investments towards empowering employees to drive a pleasant customer experience across all customer touch points. Also, in all our capacity and skills enhancement programs for the employees, we will continue emphasizing the need for the staff to serve customers as a means of consolidating our position as the most sought after bank in the industry. To sum up, employees' development and trainings would remain at the forefront of our strategic focus. We would acutely remain conscious in attracting and retaining the best talent pool.

We are committed in maintaining our unique positioning as a diversified financial institution with a robust heritage and strong reputation through enriched service offerings and financially viable tailored products to meet requirements of our esteemed customers; hence, enabling us to serve both our existing and next-generation customers in 2021 and beyond while translating the underlying financial strength of the entity into profits.

### Key Projects to Support Future Performance

|                                                                         |
|-------------------------------------------------------------------------|
| Details of Projects                                                     |
| Compliance Risk Management -For Domestic Operations.                    |
| MPG – Micro Payment Gateway                                             |
| CAMS Upgrade (New Loan Origination System for Auto Loan)                |
| AIMS (Audit Interactive Management System)                              |
| FCCM Upgrade & TBML Implementation                                      |
| 3D card security protocol implementation                                |
| Compliance Risk Management for Overseas Operations                      |
| e-kyc application updating with respect to Trade Based Money Laundering |
| ATM Insourcing Project (ATM Migration & Payment Scheme Certifications)  |
| iShield - Fraud management system.                                      |
| Rosetta Integration with Safewatch                                      |

### Quantitative Projections

| Outlook                                                         | Key Risks Going Forward                                                                                                                                                                                                 |
|-----------------------------------------------------------------|-------------------------------------------------------------------------------------------------------------------------------------------------------------------------------------------------------------------------|
| Deposit growth to be achieved in line with 2020 levels.         | Increased competitive rivalry within the industry for mobilizing deposits amidst low differentiation and switching costs.                                                                                               |
| Net Interest Margin (NIM) expected to fall from the 2020 level. | Risk of slower than expected advances growth and net interest margin decline in response to lower interest rates.                                                                                                       |
| Non Markup Income to achieve double digit growth.               | Risk of lower growth as transactional volumes slow and markets decline. Resurgence of the virus resulting in limited physical interaction with the clients.                                                             |
| Expenses growth to be contained in single-digit.                | No projected risks; continue to be well managed with a focus on lower discretionary spend, inculcation of operational efficiencies through business process automation and implementation of strong budgetary controls. |

|                                                                       |                                                    |
|-----------------------------------------------------------------------|----------------------------------------------------|
| CET1 ratio to be adequately kept within prescribed regulatory limits. | Higher Risk Weighted Assets (RWA's).               |
| Constant / stable dividend payout to be maintained.                   | Regulatory restrictions impacting dividend payout. |

### Uncertainties that could affect the Bank's Resource, Revenues and Operations

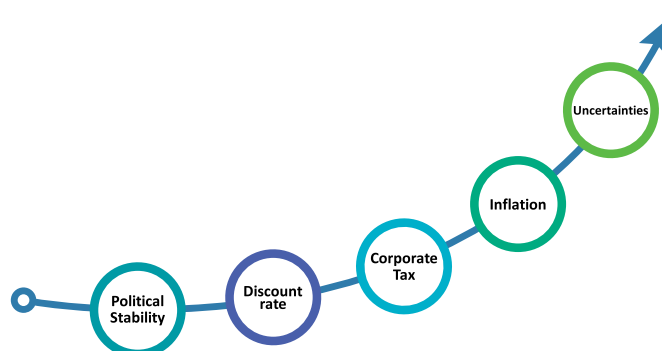

All forward-looking statements are, by nature, subject to risks and uncertainties, many of which are beyond control. Major factors that can affect the Bank's resource, revenues and operations are given below:

**Discount rate / Monetary Policy:** Based on different assessment parameters, the State Bank of Pakistan may change the monetary policy rate. Any increase in the discount rate will initially have an adverse impact on Bank's net interest income due to the repricing lag between earning assets and liabilities. However, as the rate stabilizes, the net interest margins will improve and have a positive impact on Bank's profitability.

The impact of interest rate sensitivity on the banks profitability has been disclosed in note 45.2.4 of the financial statements.

**Inflation:** Inflation is considered to be a key determinant of policy rate change. Any uptick in the inflation statistics will have a material impact on the monetary policy rate along with other drivers.

**Political Stability & Law and order situation:** Political stability and controlled law & order situation is a pre-requisite for any economy. This, in turn, reposes investor confidence in the soils of Pakistan, making our corporates a potential investment opportunity. However, any act of terrorism or political instability can negatively impact the economy /equity market, thus resulting in decreased profitability.

**Corporate Tax rate:** Any increase in the corporate tax rate or continuation of super tax will adversely impact the profitability of the Bank.

### External Environment

The Bank's external environment, including political, economic, social, technological, environmental and legal factors have an impact on business performance, strategic objectives and availability, quality and affordability of capitals. Details have been disclosed in the risks and opportunities section of this report.

### Status of Projects Disclosed in the Forward-Looking Statement of Previous Year:

| Detail of last year projects             | Status     |
|------------------------------------------|------------|
| Loan Originating System                  | Completed  |
| Issuance of Dual Interface Card          | Completed  |
| Privilege Identity Management            | Completed  |
| Mobile Device Management (MDM) Tools     | Completed  |
| Automation of Intercity Charges          | Completed  |
| Reuters Integration with Treasury system | Completed  |
| 3D card security protocol implementation | In process |
| e-kyc application update                 | In process |

## Performance of the Bank against Forward-Looking disclosure of 2020 as Presented in the Annual Report 2019

| Forward-looking disclosure for 2020 as presented in annual report 2019                                                                                                                                                                                                                                                                                                                                                                                                                                                                                                                                                                                                                                                                                                                                                                                                                                                                                                                                                                                                                                                                                                                                                                                                                                                                                                                                                                                                                                                                                                                                                                                                                                                                                                                                                                                                                                                                                                                                                                                                                                                                                                                                                                                                                                                                                                                                                                        | Performance of the Bank in 2020 against forward-looking disclosure                                                                                                                                                                                                                                                                                                                                                                                                                                                                                                                                                                                                                                                                                                                                                                                                                                                                                                                                                                                                                                                                                                                                                                                                                                                                                                                                                                                                                                                                                                                                                                                                                                                                                                                                                                                                                                                                                                                                                                                                                                                                                                                                                                                                                   |
|-----------------------------------------------------------------------------------------------------------------------------------------------------------------------------------------------------------------------------------------------------------------------------------------------------------------------------------------------------------------------------------------------------------------------------------------------------------------------------------------------------------------------------------------------------------------------------------------------------------------------------------------------------------------------------------------------------------------------------------------------------------------------------------------------------------------------------------------------------------------------------------------------------------------------------------------------------------------------------------------------------------------------------------------------------------------------------------------------------------------------------------------------------------------------------------------------------------------------------------------------------------------------------------------------------------------------------------------------------------------------------------------------------------------------------------------------------------------------------------------------------------------------------------------------------------------------------------------------------------------------------------------------------------------------------------------------------------------------------------------------------------------------------------------------------------------------------------------------------------------------------------------------------------------------------------------------------------------------------------------------------------------------------------------------------------------------------------------------------------------------------------------------------------------------------------------------------------------------------------------------------------------------------------------------------------------------------------------------------------------------------------------------------------------------------------------------|--------------------------------------------------------------------------------------------------------------------------------------------------------------------------------------------------------------------------------------------------------------------------------------------------------------------------------------------------------------------------------------------------------------------------------------------------------------------------------------------------------------------------------------------------------------------------------------------------------------------------------------------------------------------------------------------------------------------------------------------------------------------------------------------------------------------------------------------------------------------------------------------------------------------------------------------------------------------------------------------------------------------------------------------------------------------------------------------------------------------------------------------------------------------------------------------------------------------------------------------------------------------------------------------------------------------------------------------------------------------------------------------------------------------------------------------------------------------------------------------------------------------------------------------------------------------------------------------------------------------------------------------------------------------------------------------------------------------------------------------------------------------------------------------------------------------------------------------------------------------------------------------------------------------------------------------------------------------------------------------------------------------------------------------------------------------------------------------------------------------------------------------------------------------------------------------------------------------------------------------------------------------------------------|
| <p>Pakistani banking sector will continue to face headwinds in 2020, on the back of rising interest rates and slowing economic growth; irrespective of these facts, the Bank is committed to deliver remarkable results to its investors in 2020. Our strategic agenda for 2020 is guided by the Bank's five year corporate plan. The Plan is centered on strategic pillars including customer centricity, geographical expansion, technology and cyber security and people development (among others) which are aimed at building a competitive and future fit.</p> <p>We are committed in expanding our network of branches to meet our valuable customers' expectations with parallel investment on the digital infrastructure. We would continue to improve our asset quality, increasing low cost deposit base, deploying cost efficient techniques and increasing contribution from non-markup segment. We will exceedingly focus in increasing low cost CASA base to increment our net interest margins.</p> <p>On credit side the Bank is geared up to continue with its growth strategy in 2020, with continued focus on book building, albeit with cautious approach, given overall slowdown in the economy which is expected to continue into 2020; while proactively monitoring watch listed portfolio of the bank to minimize any further infection, while ensuring that recoveries are made in line with agreements. We will also continue to focus on cross sell initiatives with corporate clients for additional business opportunities to augment fee income.</p> <p>On investment side, the Bank is committed on strategic profiling of the investments based on the interest rate calls which will be a gradual shift from shorter to longer term investments.</p> <p>Recovery from infected portfolio would remain one of the key targets in 2020. We would continue adding products and services to our menu and anticipate significant growth in our non-fund based income. The Bank will continue to invest in developing workforce for the 'Digital Banking Age' to align ourselves with the ever changing business dynamics.</p> <p>Driving customer centricity will again be a key area of focus in next year; we will direct investments towards empowering employees to drive a pleasant customer experience across all our touch points. Also, in all our capacity and skills enhancement programmes to the</p> | <p>MCB's profit before tax grew to Rs. 48.24 billion which reflects a tremendous growth of 20% over 2019, despite a tough operating and macro-economic environment due to the COVID-19 outbreak. The key highlights were impressive increase in net interest margins through a gradual shift in the maturity profiling of the investment base amidst evolving yield curve expectations along with a more refined cost structure.</p> <p>During the past few years, the lack of credit opportunities resulted in the banking sector liquidity being deployed in Government Papers as the Government's borrowing appetite has continued to grow. Net interest income rose to Rs. 71.33 billion, 20% higher than the last year primarily due to the increase in investment income. Analysis of the interest earning assets highlights that income on advances decreased by Rs. 14.45 billion, primarily on account of decrease in yield of 236bps. On the investment side, gross markup income increased by Rs. 16.50 billion, primarily due to increased average volume by Rs. 195.78 billion. On the interest bearing liabilities side, the cost of deposits decreased by 146bps over the corresponding year.</p> <p>The non-markup income block of the Bank was reported at Rs. 18.13 billion with major contributions coming in from fee commission and foreign exchange income. One of the major revenue line supplementing the fee growth was branch banking customer fee. During the year 2020, consumer lending function underwent a series of challenges, mostly brought about by the COVID-19-pandemic. Despite the impact of COVID in 2020, Bank booked fresh auto loans of Rs. 8.97 billion. Credit card business has exhibited growth with closing the book standing at Rs. 3.15 billion; depicting a growth of 17% over the last year. Bancassurance business achieved sales volume of Rs. 2.6 billion.</p> <p>Despite the inflationary surge during the year, growth in the operational network and constant investment in digital, cyber security and information technology related platforms, the operating expense (excluding PF reversal) was decreased by Rs. 129 million as efficient cost management remained one of the key strengths for MCB Bank Limited.</p> |

| Forward-looking disclosure for 2020 as presented in annual report 2019                                                                                                                                                                                                                                                                                                                                                                                                                                                                                                                                                                                                                                                                        | Performance of the Bank in 2020 against forward-looking disclosure                                                                                                                                                                                                                                                                                                                                                                                                                                                                                                                                                                                                                                                                                                                                                                                                                                                                                                                                                                                                                                                                                                                                                                                                                                                                                                                                                                                                                                                                                         |
|-----------------------------------------------------------------------------------------------------------------------------------------------------------------------------------------------------------------------------------------------------------------------------------------------------------------------------------------------------------------------------------------------------------------------------------------------------------------------------------------------------------------------------------------------------------------------------------------------------------------------------------------------------------------------------------------------------------------------------------------------|------------------------------------------------------------------------------------------------------------------------------------------------------------------------------------------------------------------------------------------------------------------------------------------------------------------------------------------------------------------------------------------------------------------------------------------------------------------------------------------------------------------------------------------------------------------------------------------------------------------------------------------------------------------------------------------------------------------------------------------------------------------------------------------------------------------------------------------------------------------------------------------------------------------------------------------------------------------------------------------------------------------------------------------------------------------------------------------------------------------------------------------------------------------------------------------------------------------------------------------------------------------------------------------------------------------------------------------------------------------------------------------------------------------------------------------------------------------------------------------------------------------------------------------------------------|
| <p>employees, we will continue emphasizing the fact that, It is undoubtedly our ability to delight customers that is key to retaining our position as the most sought after bank in the industry. To sum up, employees' development and trainings would remain our foremost priority as committed and professional team is our strategic advantage. We would acutely remain conscious in retaining and attracting the best talent.</p> <p>We are committed in maintaining our status of one of the leading banks operating in Pakistan through enriched service quality, financially viable tailored products to meet requirements of our esteemed customer and translating the underlying financial strength of the entity into profits.</p> | <p>MCB Home Remittances surged to generate a volume of PKR 519 billion, registering a growth of 14% over last year while the trade volumes decreased by 1.2%, over the corresponding year, as a result of the slow down witnessed in economic activity.</p> <p>On the provision side, Bank made continued progress on its strategic path and recorded a cumulative recovery of Rs.2.4 billion by settling a large number of hardcore and protracted defaults.</p> <p>On the liabilities side, the deposit base of the Bank registered a significant increase of Rs. 144.739 billion (+13%) over December 2019.</p> <p>Return on Assets and Return on Equity were reported at 1.77% and 18.88% respectively, whereas the book value per share was reported at Rs. 137.02.</p> <p>MCB remained active throughout Pakistan, UAE and Sri Lanka through diverse network of 1,441 branches (including 12 sub-branches) and more than 1,430 ATMs.</p> <p>To enhance the knowledge and skillset of its workforce, a number of trainings were held during the year. Participants from all over the country were trained through different programs including in-house, ex-house, mobile, and E-learning training programs. A segment comprising senior management was engaged through a Management Development Program as part of the Talent Management Scheme of the Bank.</p> <p>Detailed analysis covering performance and achievements of respective groups against their targets for 2019 is included in the Groups' review section of this annual report.</p> |

### **Sources of Information and Assumptions used for Projections and Forecast**

The Bank gathers and compiles internal business data, external economic indicators and industry specific analysis from various sources and utilizes in-house developed tools and functional expertise to process these items through a calculation; in turn laying the foundation for its operational and financial forecasts and projections.

The Bank assumes that discount rate cycle has bottomed and expects it to slightly increase after a period of pause. With respect to PKR, we expect it will devalue by further 5%; however, the volatility observed in 2020 is not expected to be repeated and the exchange rate movement will be comparatively stable. With regards to overall economic activity, results from economic actions undertaken by the Government will positively impact overall economic cycle in the country. The recovery is evident, as large-scale manufacturing has increased, current account surplus has been achieved, and exports have shown recovery in recent months.

### **Our Response to Critical Challenges and Uncertainties**

MCB remains well poised to respond to all critical challenges and uncertainties emanating from the realization of various systematic and idiosyncratic risks by capitalizing on its stable funding structure, ample liquidity buffers, resilient capital base and a pragmatic business strategy.

During the year 2020, proactively monitoring the scenario and analyzing the ever changing and dynamic situation (both domestically and internationally) amidst the COVID-19 outbreak, the Bank exhibited its institutional readiness by successfully invoking its Business Continuity Plan (BCP) for all critical areas; while simultaneously supporting Governments key pandemic responses for credit extension and provision of uninterrupted and essential banking services to the general public.

For details on Bank's readiness to respond to critical challenges and uncertainties, please refer to the Risk Management Framework, Business Continuity Management and Pandemic Recovery Plan in the Annual Report.



# Graphical Presentation of Financial Statements

Statement of Financial Position (Rupees in Million)

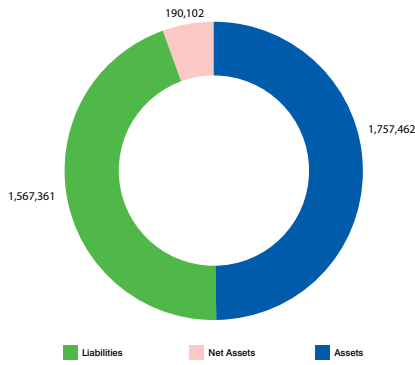

Variance from YE 19

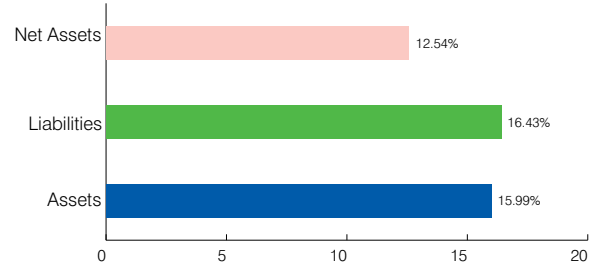

Profit & Loss Account (Rupees in Million)

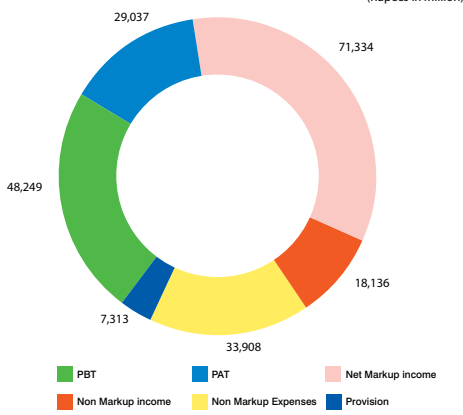

Variance from 2019

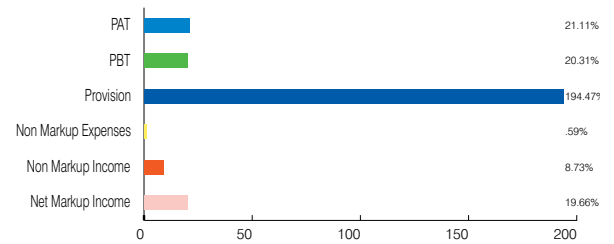

Cash Flows 2020 (Rupees in Million)

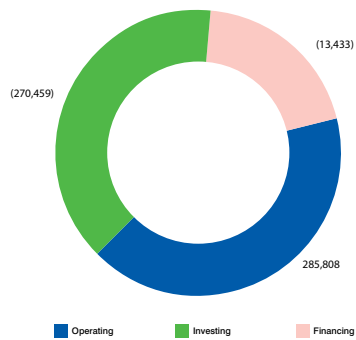

Cash Flows 2019 (Rupees in Million)

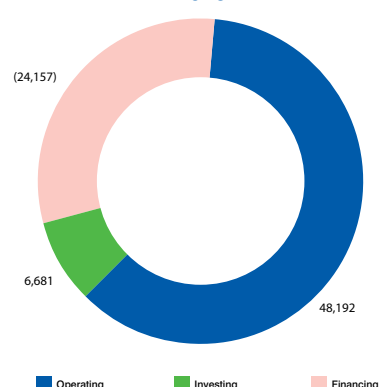

## Analyses of Financial Performance

Gross markup income reported a decrease of Rs. 2.216 billion for the year 2020 when compared with 2019. Income on advances decreased by Rs. 14.451 billion, primarily on account of decline in yield by 236bps coupled with lower average advances volume of Rs. 30.741 billion; whereas, volumetric growth of Rs. 195.780 billion in average investments resulted in increased markup income on investments which grew by Rs. 16.502 billion.

| Mark-Up/Return/ Interest Earned    | Rs in million |         |          |       |
|------------------------------------|---------------|---------|----------|-------|
|                                    | 2020          | 2019    | Variance |       |
|                                    |               |         | Amount   | % age |
| Loans and advances                 | 42,879        | 57,330  | (14,451) | -25%  |
| Investments                        | 91,983        | 75,481  | 16,502   | 22%   |
| Lendings to financial institutions | 998           | 4,982   | (3,984)  | -80%  |
| Balances with banks                | 215           | 499     | (284)    | -57%  |
|                                    | 136,075       | 138,292 | (2,217)  | -2%   |

The Bank reported a decrease of Rs. 13.935 billion over last year in markup expense. Mark up expense on deposits decreased by Rs. 10.249 billion, whereas markup expenses on borrowings decreased by 2.825 billion. Significant drop of 625bps in the discount rate during the year resulted in a sharp decrease in deposit cost by 146bps as compared to the last year.

| Mark-Up/Return/Interest Expensed                        | Rs in million |        |          |       |
|---------------------------------------------------------|---------------|--------|----------|-------|
|                                                         | 2020          | 2019   | Variance |       |
|                                                         |               |        | Amount   | % age |
| Deposits                                                | 55,095        | 65,344 | (10,249) | -16%  |
| Borrowings                                              | 6,152         | 8,977  | (2,825)  | -31%  |
| Subordinated debt                                       | -             | 214    | (214)    | -100% |
| Cost of foreign currency swaps                          | 2,387         | 3,009  | (622)    | -21%  |
| Unwinding cost of liability against right-of-use assets | 1,107         | 1,132  | (25)     | -2%   |
|                                                         | 64,741        | 78,676 | (13,935) | -18%  |

The non-markup income block of the Bank was reported at Rs. 18.135 billion with major contributions coming in from fee commission, foreign exchange income and gain on sale of securities. Fee income reported a decline of 3% for the year, primarily due to reduced transaction volumes and subdued business activity amidst enforced lockdowns. The captioned decline in fee income was set off by higher capital gains, amounting to Rs. 3.3 billion, realized during the year amidst proactive duration management of the investments portfolio within the evolving yield curve scenario.

| Non Mark-Up / Interest Income      | Rs in million |        |          |       |
|------------------------------------|---------------|--------|----------|-------|
|                                    | 2020          | 2019   | Variance |       |
|                                    |               |        | Amount   | % age |
| Fee and commission income          | 10,936        | 11,288 | (352)    | -3%   |
| Dividend income                    | 1,210         | 1,377  | (167)    | -12%  |
| Foreign exchange income            | 2,525         | 2,895  | (370)    | -13%  |
| Income from derivatives            | 4             | 15     | (11)     | -73%  |
| Gain on securities                 | 3,332         | 833    | 2,499    | 300%  |
| Other income                       | 128           | 272    | (144)    | -53%  |
| Total non-markup / interest income | 18,135        | 16,679 | 1,455    | 9%    |

On the operating expenses (excluding PF reversal) side, despite sustained inflationary pressures, expansion in branch outreach and continued investment in technological infrastructure together with regular performance and merit

adjustments for the Human Capital, Bank's strategic focus of balancing short term tactical cost reductions with long term cost initiatives has assisted in containing growth in expenses; in turn registering a decline of Rs. 129 million.

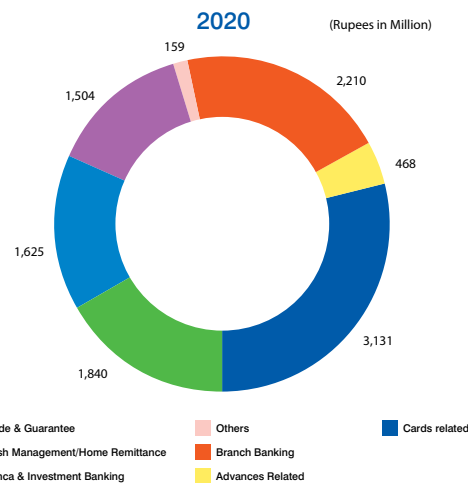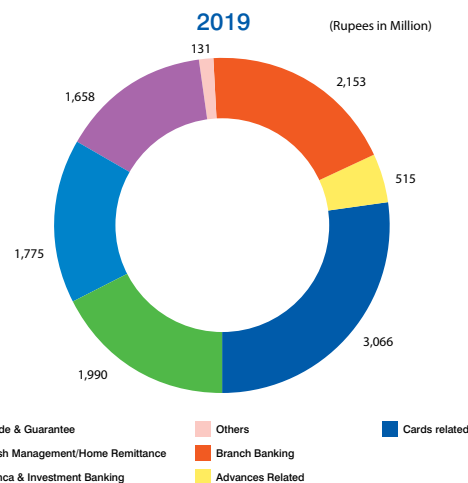

### Performance against Targets

During 2020, the Bank has achieved budget of deposits and profit. Further, Bank's current year's performance against targets disclosed in the Annual Report of 2019 is covered in "Forward Looking" section of the Annual Report.

### Objectives to Assess Stewardship of Management

The Bank strives to maximize shareholder value through delivering remarkable returns and achieving sustainable performance that exceeds market and shareholder expectations. Key Performance Indicators (KPI's) to measure Bank's performance against its short, medium and long term objectives along with corresponding strategies have been disclosed in the "Strategic and Resource Allocation" section of the Annual Report.

**Future Prospects for Profit**

Future prospects about Bank's profitability have been covered in the Directors Report and "Forward Looking" section of the Annual Report.

**Explanation of negative change in the performance against prior year**

For the year under review, profit before tax of the Bank increased by 20% over last year. However Fee commission & FX income declined over the previous year on account of reduced transaction volumes and subdued business activity amidst enforced lockdowns. With the lifting of lockdowns and flattening of COVID-19 infection curve, fee income normalized in Q3 & Q4 2020. Further, in anticipation that portfolios affected by the pandemic might require provisioning once SBP's relaxations and waivers expire in 2021, the management has exercised prudence and booked a general provision of Rs. 4.0 billion during the year under review, hence providing insulation and loss absorption capacity against any risks to asset quality.

# Analyses of Non Financial Performance

## Non-Financial Highlights

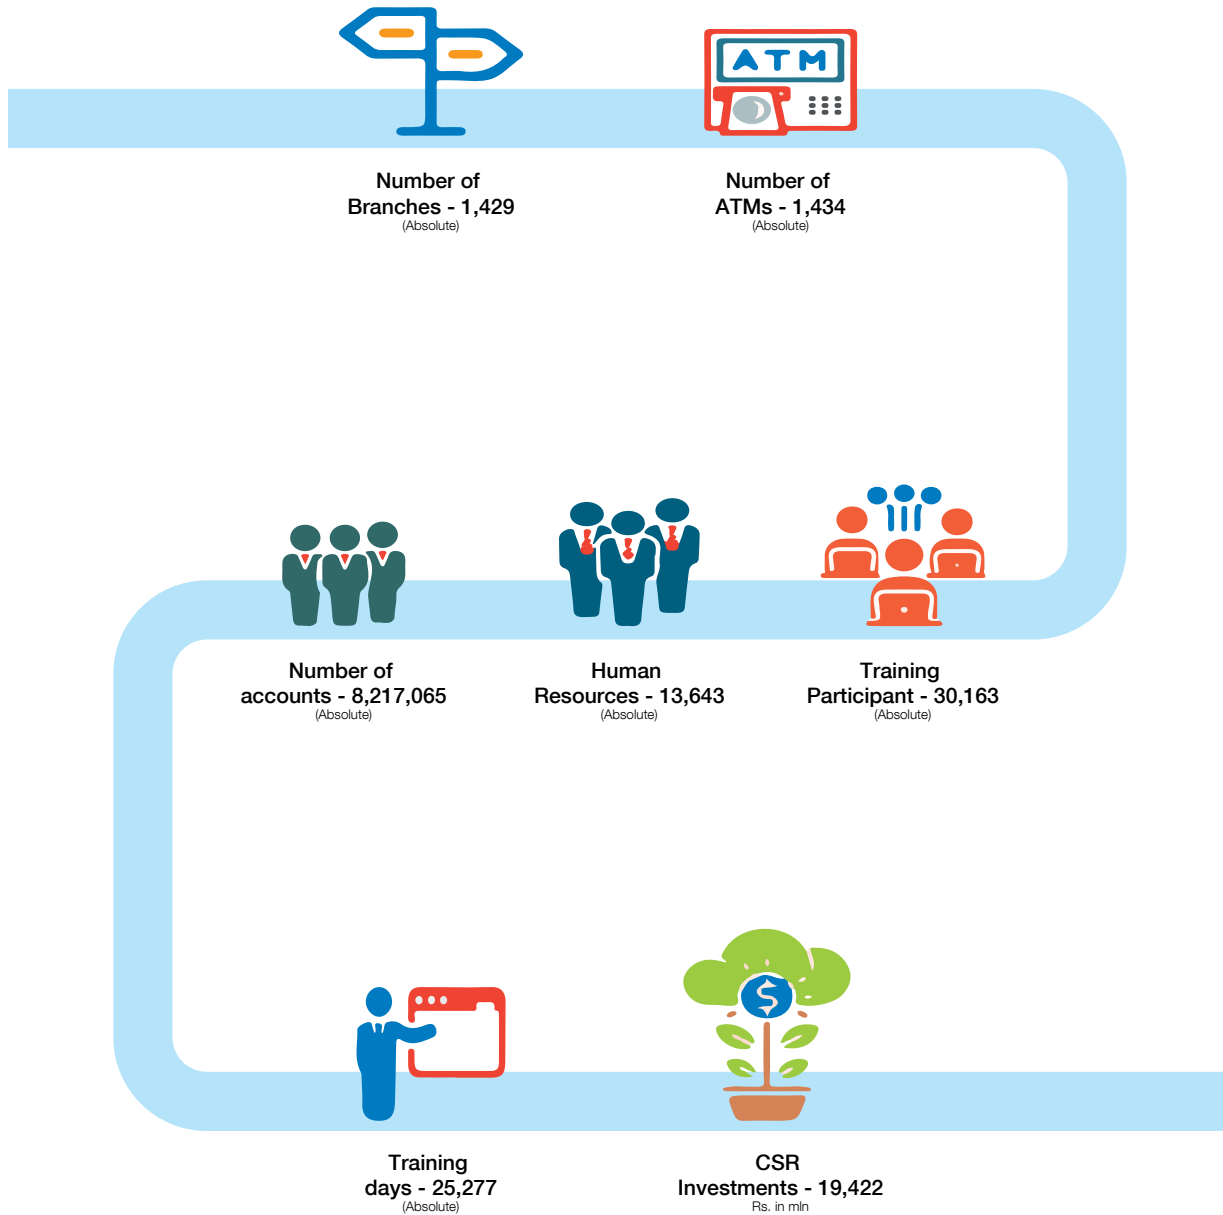

**Human capital**

| Total number of permanent employees | Investment in training (Rs. in Mln) | Total days of Training | New Recruitments | Promotions |
|-------------------------------------|-------------------------------------|------------------------|------------------|------------|
| 13,643                              | 36.51                               | 25,277                 | 1,430            | 2,356      |

Our employees, numbering 13,643 receive well remunerated, secure and satisfying employment with generous retirement benefits.

Our strategy is to align what is best for the employees with what is best for the Bank. Our performance management system has been designed to motivate employees to pursue goals that will enable the Bank to achieve its strategic objectives. Our development and training activities also contribute to the same objective in the longer term. Thus, we have built a performance-based culture that will support both short term and long-term value creation.

Our human resources remain the key asset to our success and growth which is evident from the below mentioned analysis.

|                                 |            | 2020   | 2019   |
|---------------------------------|------------|--------|--------|
| Staff strength                  | Absolute   | 13,643 | 13,596 |
| New recruitments                | Absolute   | 1,430  | 2,235  |
| Average number of employees     | Absolute   | 13,345 | 13,568 |
| Promotions                      | Absolute   | 2,356  | 1,978  |
| Investment in training          | Rs. in Mln | 36.51  | 57.23  |
| Number of training participants | Absolute   | 30,163 | 30,442 |
| Training days                   | Absolute   | 25,277 | 30,255 |

**Manufactured Capital**

| Capital expenditures on physical & digital infrastructure | Branches excluding sub-branches | ATMs  | Internet Banking customers | Mobile Banking customers |
|-----------------------------------------------------------|---------------------------------|-------|----------------------------|--------------------------|
| PKR 3,090 million                                         | 1,429                           | 1,434 | 198,939                    | 1,396,475                |

Manufactured capital consists of our physical branch network and other tangible and intangible items that support our operations outreach such as equipment, IT systems and network.

During the year, Bank has expanded its network by 19 branches. In 2020, account base of the Bank expanded to 8.2 million accounts.

The banking model is in gradual transformation from traditional banking to digital era. Hence, to cater to the growing segment of millennials among our customers, the Bank has been continuously investing on the digital banking platforms. We are increasing our digital touch points on a gradual pace, providing our customers transactional convenience while ensuring financial security.

|                     |            | 2020      | 2019      |
|---------------------|------------|-----------|-----------|
| Capital expenditure | Rs. in Mln | 3,090     | 5,022     |
| Branches            | Absolute   | 1,429     | 1,410     |
| ATMs                | Absolute   | 1,434     | 1,360     |
| Internet Banking    | Absolute   | 198,939   | 180,326   |
| Mobile Banking      | Absolute   | 1,396,475 | 1,909,712 |

**Intellectual capital**

| Cumulative service experience of more than 73 years | Strong Governance | One of the most valuable brand |
|-----------------------------------------------------|-------------------|--------------------------------|
|                                                     |                   |                                |

Intangibles associated with the Bank – culture, ethics, values, organizational knowledge, systems, procedures and brand value. These intangibles, while not reflected in the balance sheet, are indeed the real assets of the Bank. They permeate the Bank's operations at all levels – whether it is high level decision-making or day-to-day functions.

In 2020 we have focused on following points to enhance of our intellectual capital:

- Explore customers' views and expectations with regard to selected Deposit products on features, processes and service delivery
- Evaluate customer satisfaction to understand the service level of the Bank
- Explore the new trends in consumer banking to ascertain future banking preferences

During the year, the total investment on intangible assets is Rs. 298.880 million as compared to Rs. 625.800million in FY19.

**Social and Relationship Capital**

| No. of accounts | Dividends to shareholders (Rs. in Mln) | CSR funds (Rs. in Mln) |
|-----------------|----------------------------------------|------------------------|
| 8,217,065       | 23,701                                 | 19,425                 |

The Pakistan banking industry is more competitive than it has ever been, and factors such as customer service and convenience are distinguishing features that customers look for. With a strong network of branches across the Country, MCB maintains strength in geographic reach that few can match. Analysis of social and relationship capital as compared to prior year is as follows:

|                                     |              | 2020      | 2019      |
|-------------------------------------|--------------|-----------|-----------|
| No. of accounts                     | Absolute     | 8,217,065 | 8,223,038 |
| Dividends to shareholders           | (Rs. in Mln) | 23,701    | 20,146    |
| CSR funds                           | Rs. in Mln   |           |           |
| Education Allowance                 |              | 33        | 38        |
| Staff Capacity Building & Trainings |              | 37        | 57        |
| Employee Hajj Expense               |              | -         | 13        |
| Contribution to National Exchequer  |              | 19,212    | 16,125    |
| Contribution To Staff Welfare Fund  |              | 5         | 5         |
| Donation                            |              | 113       | -         |
| Plantation                          |              | 22        | 24        |
| Total                               |              | 19,422    | 16,262    |

## Maturities of Assets and Liabilities

|                                       | 2020      | Upto 3M | 3M to 1Y | 1Y to 3Y | Rs. in Million |            |
|---------------------------------------|-----------|---------|----------|----------|----------------|------------|
|                                       |           |         |          |          | 3Y to 5Y       | 5Y & above |
| <b>Assets</b>                         |           |         |          |          |                |            |
| Cash and balances with treasury banks | 122,181   | 122,181 | -        | -        | -              | -          |
| Balances with other banks             | 24,030    | 24,030  | -        | -        | -              | -          |
| Lendings to financial institutions    | 17,139    | 17,139  | -        | -        | -              | -          |
| Investments - net                     | 1,015,869 | 503,984 | 180,703  | 103,484  | 36,564         | 191,134    |
| Advances - net                        | 462,942   | 101,814 | 76,738   | 146,477  | 82,944         | 54,969     |
| Fixed assets                          | 58,028    | 984     | 2,951    | 7,091    | 4,047          | 42,955     |
| Intangible assets                     | 938       | 178     | 535      | 226      | -              | -          |
| Deferred tax assets                   | 2,783     | 694     | 2,089    | -        | -              | -          |
| Other assets - net                    | 56,334    | 34,151  | 2,665    | 8,680    | 10,838         | -          |
|                                       | 1,760,245 | 805,155 | 265,681  | 265,958  | 134,393        | 289,058    |
| <b>Liabilities</b>                    |           |         |          |          |                |            |
| Bills payable                         | 23,981    | 23,981  | -        | -        | -              | -          |
| Borrowings                            | 164,001   | 129,481 | 6,858    | 10,954   | 4,832          | 11,876     |
| Deposits and other accounts           | 1,289,502 | 120,576 | 114,596  | 632,303  | 316,784        | 105,243    |
| Deferred tax liabilities              | 9,758     | 251     | 1,007    | 2,566    | 2,432          | 3,502      |
| Other liabilities                     | 82,901    | 34,090  | 17,673   | 11,837   | 15,388         | 3,913      |
|                                       | 1,570,143 | 308,379 | 140,134  | 657,660  | 339,436        | 124,534    |

\*Based on expected maturities

## Key Interest Bearing Assets and Liabilities

|                                                  | 2020           |                           |                | 2019           |                           |                |
|--------------------------------------------------|----------------|---------------------------|----------------|----------------|---------------------------|----------------|
|                                                  | Avg. Vol (Mln) | Effective interest rate % | Interest (Mln) | Avg. Vol (Mln) | Effective interest rate % | Interest (Mln) |
| <b>Interest Earning Assets</b>                   |                |                           |                |                |                           |                |
| Lendings to Financial Institutions               | 13,735         | 7.27                      | 998            | 45,660         | 10.91                     | 4,982          |
| Gross Advances (excluding NPLs)                  | 459,219        | 9.34                      | 42,879         | 489,960        | 11.70                     | 57,330         |
| Gross Investments (excluding equity investments) | 854,012        | 10.77                     | 91,983         | 658,232        | 11.47                     | 75,481         |
| <b>Interest Bearing Liabilities</b>              |                |                           |                |                |                           |                |
| Deposits (excl. current deposits)                | 765,997        | 7.19                      | 55,095         | 693,156        | 9.43                      | 65,344         |
| Borrowings                                       | 116,155        | 5.30                      | 6,152          | 114,512        | 7.84                      | 8,977          |

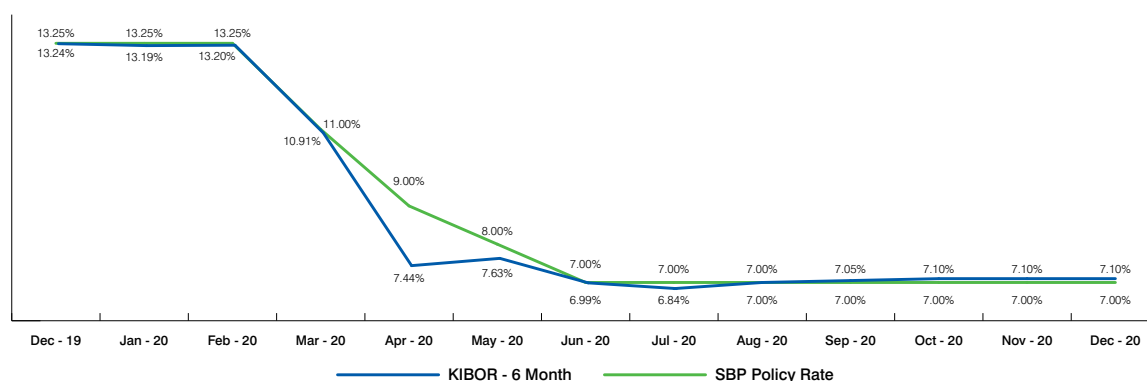

## Non Performing Loans

| Categorywise | Rs. in Mln    |               |               |               |             |             |              |
|--------------|---------------|---------------|---------------|---------------|-------------|-------------|--------------|
|              | 2020          |               | 2019          |               | Variance    |             | 2020         |
|              | NPLs          | Provision     | NPLs          | Provision     | NPLs        | Provision   | Coverage     |
| OAEM         | 44            | 2             | 124           | 4             | -64.8%      | -43.8%      | 4.6%         |
| Substandard  | 214           | 53            | 616           | 153           | -65.2%      | -65.5%      | 24.6%        |
| Doubtful     | 285           | 142           | 2,702         | 1,351         | -89.5%      | -89.5%      | 50.0%        |
| Loss         | 50,646        | 44,946        | 45,982        | 40,427        | 10.1%       | 11.2%       | 88.7%        |
| <b>Total</b> | <b>51,189</b> | <b>45,143</b> | <b>49,424</b> | <b>41,934</b> | <b>3.6%</b> | <b>7.7%</b> | <b>88.2%</b> |

  

| Groupwise    | NPLs                  | Provision     | NPLs          | Provision     | NPLs        | Provision   | Coverage     |
|--------------|-----------------------|---------------|---------------|---------------|-------------|-------------|--------------|
|              | Commercial & Consumer | 6,449         | 6,100         | 7,985         | 6,797       | -19.2%      | -10.3%       |
| Corporate    | 4,695                 | 4,692         | 3,230         | 1,993         | 45.3%       | 135.4%      | 99.9%        |
| Overseas     | 8,444                 | 3,470         | 8,190         | 3,353         | 3.1%        | 3.5%        | 41.1%        |
| Others       | 31,601                | 30,880        | 30,019        | 29,791        | 5.3%        | 3.7%        | 97.7%        |
| <b>Total</b> | <b>51,189</b>         | <b>45,143</b> | <b>49,424</b> | <b>41,934</b> | <b>3.6%</b> | <b>7.7%</b> | <b>88.2%</b> |

Non Performing Loans (2015-2020) (Rupees in Billion)

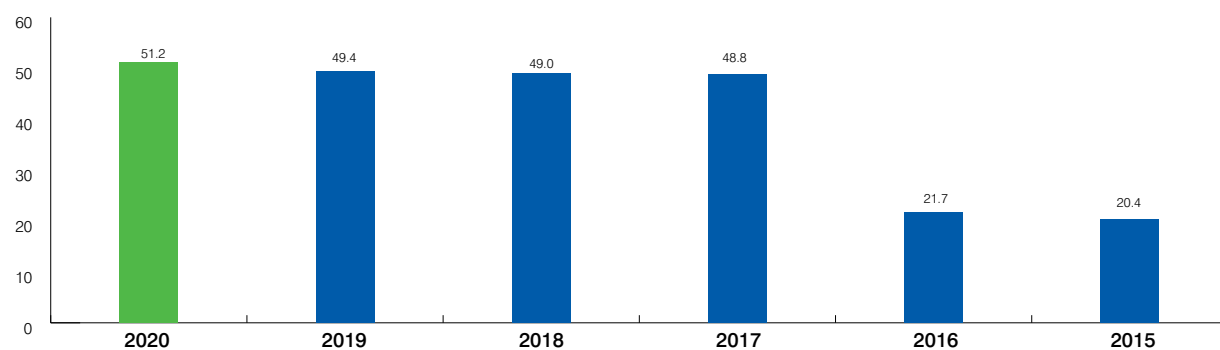

\*Infection and Coverage Ratios (2015-2020)

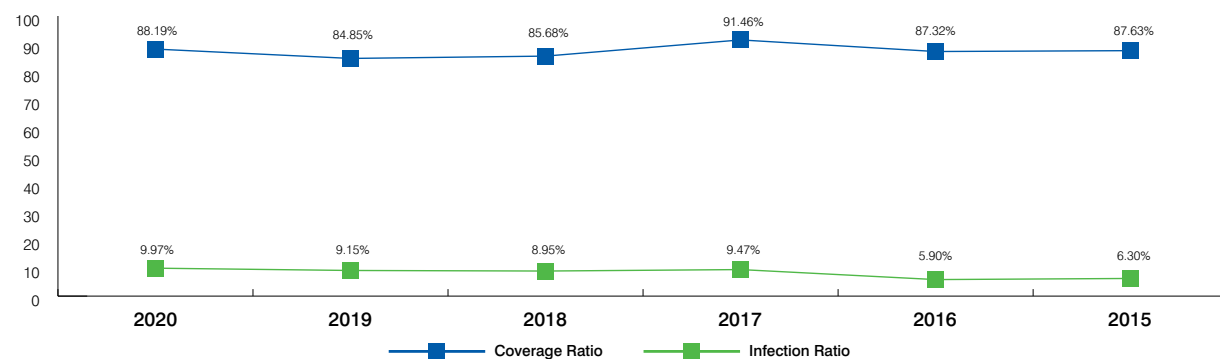

\*Based on specific provision only

# Deposits & Advances - Sector wise

December 31, 2020

| Sector                                               | Deposits         | Rupees in Million<br>Advances |
|------------------------------------------------------|------------------|-------------------------------|
| Agriculture, forestry and fishing                    | 25,506           | 5,122                         |
| Construction                                         | 44,354           | 18,082                        |
| Electricity, gas, steam and air conditioning supply  | 55,408           | 37,521                        |
| Financial                                            | 31,071           | 17,534                        |
| Individuals                                          | 829,945          | 43,906                        |
| Manufacture of basic metals and metal products       | 2,101            | 14,914                        |
| Manufacture of cement                                | 5,275            | 9,742                         |
| Manufacture of chemicals and pharmaceutical products | 14,674           | 42,385                        |
| Manufacture of food & beverages products             | 30,012           | 39,632                        |
| Manufacture of sugar                                 | 5,306            | 33,283                        |
| Manufacture of textiles                              | 7,122            | 76,794                        |
| Transportation and storage                           | 2,740            | 53,062                        |
| Telecommunications                                   | 2,053            | 18,287                        |
| Services                                             | 38,947           | 10,353                        |
| Wholesale and retail traders                         | 49,487           | 53,692                        |
| Others                                               | 145,500          | 39,240                        |
|                                                      | <b>1,289,502</b> | <b>513,550</b>                |

Deposits

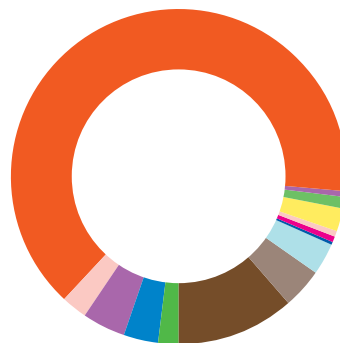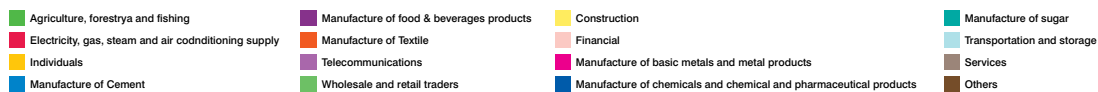

Advances

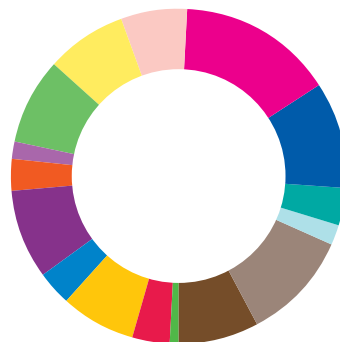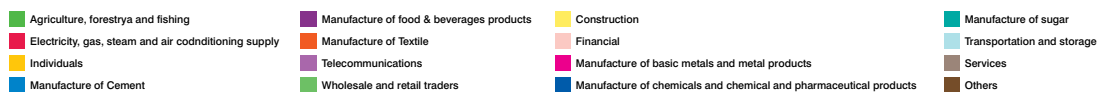



## Deposits & Advances - Group wise

Rs. in Billion

|                       | Groupwise Deposits |                |              |               | Groupwise Gross Advances |              |              |               |
|-----------------------|--------------------|----------------|--------------|---------------|--------------------------|--------------|--------------|---------------|
|                       | 2020               | 2019           | Variance     |               | 2020                     | 2019         | Variance     |               |
|                       |                    |                | Amount       | %             |                          |              | Amount       | %             |
| Commercial & Consumer | 1,168.6            | 1,034.2        | 134.4        | 13.00%        | 113.7                    | 119.3        | -5.6         | -4.69%        |
| Corporate             | 66.3               | 55.5           | 10.8         | 19.51%        | 338.8                    | 355.2        | -16.4        | -4.62%        |
| Overseas              | 54.6               | 55.0           | (0.4)        | -0.75%        | 30.1                     | 33.4         | -3.2         | -9.63%        |
| Others                | -                  | -              | -            | -             | 30.9                     | 32.2         | -1.3         | -3.90%        |
| <b>Total</b>          | <b>1,289.5</b>     | <b>1,144.7</b> | <b>144.8</b> | <b>12.65%</b> | <b>513.5</b>             | <b>540.0</b> | <b>-26.5</b> | <b>-4.90%</b> |

### CASA Mix

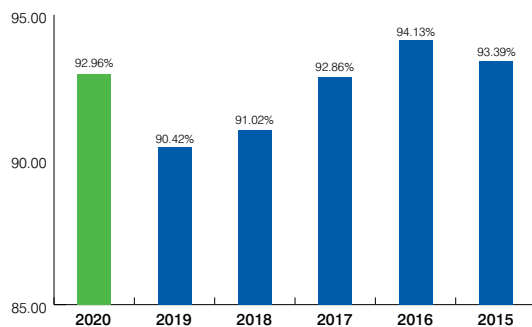

### Weighted Average Cost of Deposits

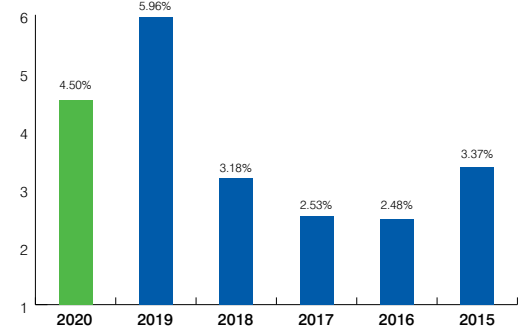

### Weekly Trend of MCB Deposits and Advances - 2020

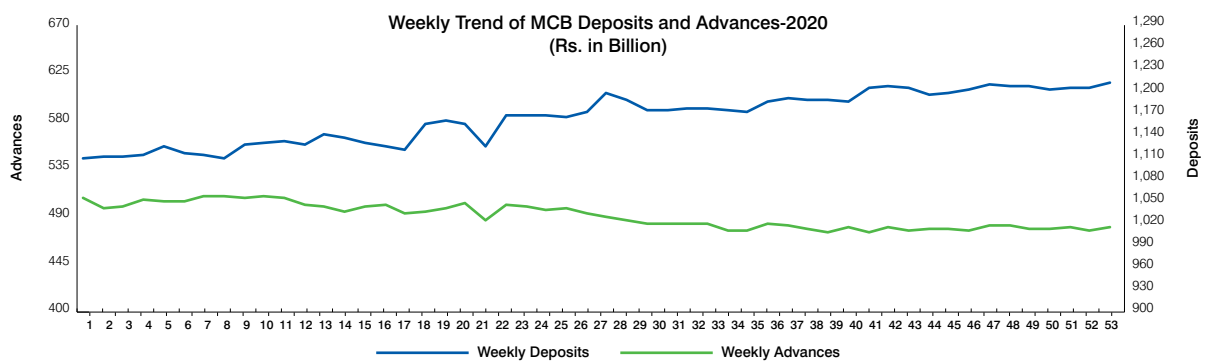

### MCB's Industry share in Deposits and Advances - 2020

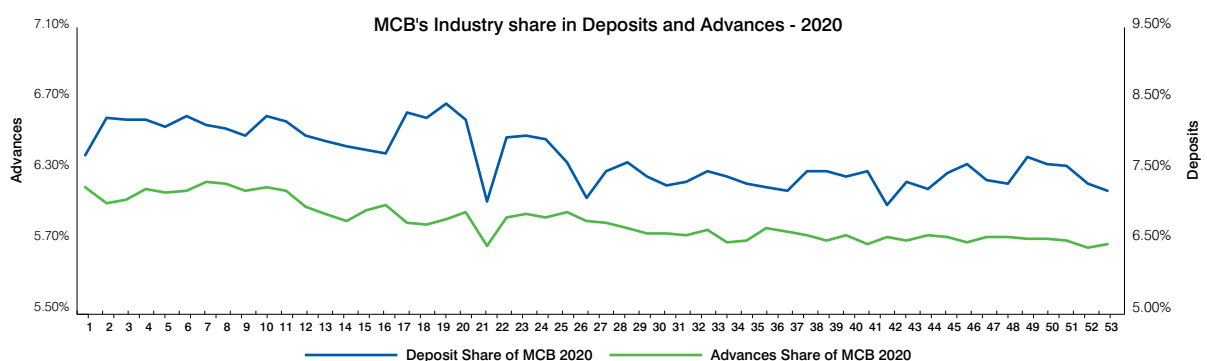

# Investments

## Top 10 Listed Equity Holdings as on December 31, 2020

| Company Name                          | Total Shares (number) | Book Value (Rs. Mln) | Market Value (Rs. Mln) |
|---------------------------------------|-----------------------|----------------------|------------------------|
| Oil & Gas Development Company Limited | 11,115,535            | 1,814                | 1,153                  |
| Kot Addu Power Company                | 15,662,000            | 1,344                | 426                    |
| Fauji Fertilizer Company Limited      | 10,844,000            | 1,195                | 1,177                  |
| Pakistan Petroleum Limited            | 6,946,102             | 933                  | 627                    |
| Habib Bank Limited                    | 4,667,700             | 813                  | 617                    |
| Millat Tractors Limited               | 838,950               | 780                  | 918                    |
| United Bank Limited                   | 4,613,107             | 774                  | 581                    |
| HBL Growth Fund-Class "A"             | 43,482,858            | 744                  | 370                    |
| National Bank of Pakistan             | 14,208,500            | 739                  | 610                    |
| Engro Fertilizers Limited             | 8,936,000             | 718                  | 565                    |

## Investment in Associates and Subsidiaries

| Company Name                                                 | Holding | Total Shares (numbers) | Book Value (Rs. Mln) |
|--------------------------------------------------------------|---------|------------------------|----------------------|
| <b>Associates</b>                                            |         |                        |                      |
| Adamjee Insurance Company Limited                            | 20.00%  | 70,000,000             | 647.88               |
| Euronet Pakistan (Pvt.) Limited                              | 30.00%  | 52,521                 | 52.52                |
| <b>Subsidiaries</b>                                          |         |                        |                      |
| MCB - Arif Habib Savings & Investments Limited               | 51.33%  | 36,956,768             | 320.12               |
| MCB Islamic Bank Limited                                     | 100.00% | 1,155,000,000          | 11,550.00            |
| MCB Non Bank Credit Organization closed joined stock company | 99.94%  | 4,281,105              | 448.19               |

## Category of Investments (2015-2020) (Rupees in Billion)

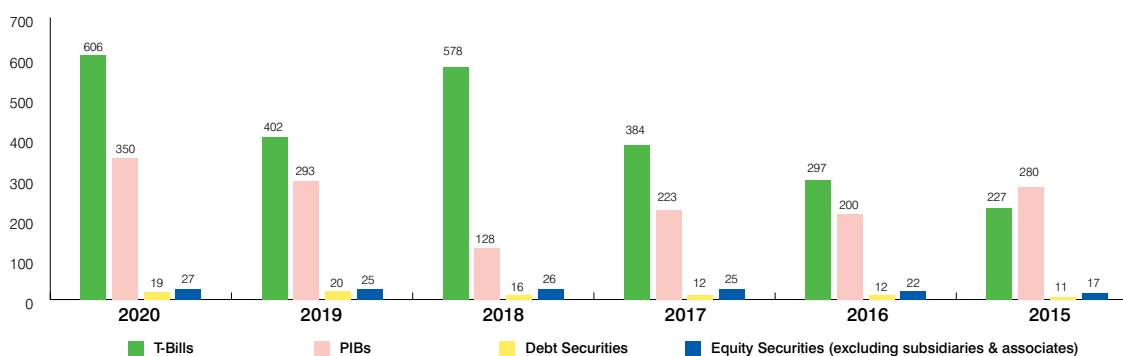

## Investments to Deposits Ratio (2015-2020)

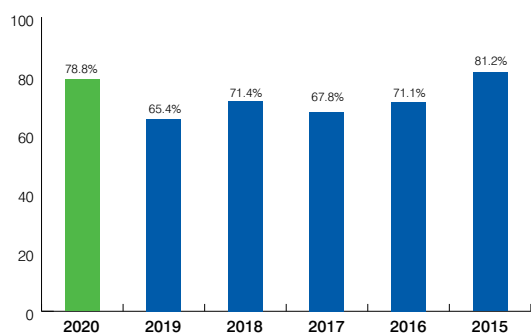

## Investments to Total Assets (2015-2020)

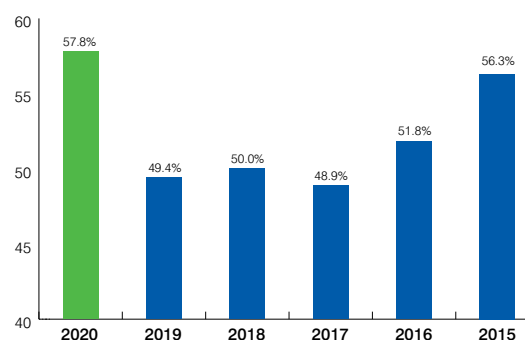

# Capital Structure

|                                                                   | 2020           | Rupees in Million<br>2019 |
|-------------------------------------------------------------------|----------------|---------------------------|
| <b>Capital Structure</b>                                          |                |                           |
| <b>Tier 1 Capital</b>                                             |                |                           |
| Shareholders equity /assigned capital                             | 11,851         | 11,851                    |
| Share premium                                                     | 23,751         | 23,751                    |
| Reserves                                                          | 53,160         | 50,257                    |
| Unappropriated profits                                            | 69,835         | 55,777                    |
|                                                                   | <b>158,597</b> | <b>141,636</b>            |
| <b>Deductions:</b>                                                |                |                           |
| Book value of intangible and advances given for intangible        | 938            | 958                       |
| Defined benefit pension fund assets - net                         | 2,191          | 2,343                     |
| Other deductions                                                  | 2,566          | 2,078                     |
|                                                                   | <b>5,695</b>   | <b>5,379</b>              |
| <b>Total Tier 1 capital</b>                                       | <b>152,901</b> | <b>136,257</b>            |
| <b>Tier 2 Capital</b>                                             |                |                           |
| General provisions subject to 1.25% of total risk weighted assets | 5,465          | 1,424                     |
| Revaluation reserves                                              | 27,165         | 23,255                    |
| Foreign exchange translation reserves                             | 2,876          | 2,675                     |
|                                                                   | <b>35,507</b>  | <b>27,354</b>             |
| <b>Deductions:</b>                                                |                |                           |
| Other deductions                                                  | -              | -                         |
| <b>Total Tier 2 Capital</b>                                       | <b>35,507</b>  | <b>27,354</b>             |
| <b>Total Regulatory Capital Base</b>                              | <b>188,409</b> | <b>163,611</b>            |
| <b>Capital Adequacy</b>                                           |                |                           |
| <b>Risk Weighted Assets</b>                                       |                |                           |
| Credit Risk                                                       | 635,599        | 638,493                   |
| Market Risk                                                       | 122,604        | 108,276                   |
| Operational Risk                                                  | 139,735        | 120,887                   |
|                                                                   | <b>897,938</b> | <b>867,656</b>            |
| <b>Total RWA</b>                                                  | <b>897,938</b> | <b>867,656</b>            |
| <b>Capital Adequacy Ratio</b>                                     |                |                           |
| Total eligible regulatory capital held                            | 188,409        | 163,611                   |
| Total Risk Weighted Assets                                        | 897,938        | 867,656                   |
| <b>Capital Adequacy Ratio</b>                                     | <b>20.98%</b>  | <b>18.86%</b>             |

Capital Adequacy Ratio (2015-2020)

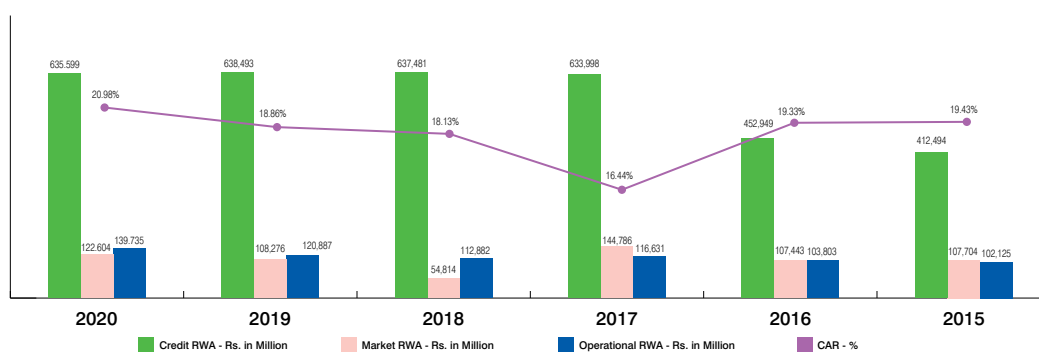

## Quarterly Performance - 2020 & 2019

|                                               | Rupees in Million |                  |                  |                  |                  |                  |                  |                  |
|-----------------------------------------------|-------------------|------------------|------------------|------------------|------------------|------------------|------------------|------------------|
|                                               | 2020              |                  |                  |                  | 2019             |                  |                  |                  |
|                                               | 4th Quarter       | 3rd Quarter      | 2nd Quarter      | 1st Quarter      | 4th Quarter      | 3rd Quarter      | 2nd Quarter      | 1st Quarter      |
| <b>Profit &amp; Loss Account</b>              |                   |                  |                  |                  |                  |                  |                  |                  |
| Mark-up earned                                | 29,040            | 31,824           | 36,112           | 39,100           | 39,842           | 39,317           | 31,751           | 27,382           |
| Mark-up expensed                              | (13,052)          | (12,490)         | (16,407)         | (22,792)         | (23,220)         | (24,123)         | (17,430)         | (13,903)         |
| Net mark-up income                            | 15,988            | 19,333           | 19,705           | 16,308           | 16,622           | 15,194           | 14,321           | 13,479           |
| Non-mark-up income                            | 4,577             | 6,476            | 3,195            | 3,888            | 5,226            | 3,493            | 4,445            | 3,514            |
| Total Income                                  | 20,565            | 25,810           | 22,900           | 20,195           | 21,849           | 18,688           | 18,766           | 16,993           |
| Non-mark-up expenses                          | (8,465)           | (8,565)          | (8,290)          | (8,588)          | (8,385)          | (8,574)          | (8,353)          | (8,398)          |
| Profit before provisions                      | 12,100            | 17,245           | 14,610           | 11,607           | 13,464           | 10,114           | 10,413           | 8,595            |
| Provisions & write off                        | (2,204)           | (1,145)          | (3,221)          | (742)            | (867)            | (856)            | (1,244)          | 484              |
| Profit before taxation                        | 9,895             | 16,099           | 11,389           | 10,865           | 12,596           | 9,257            | 9,169            | 9,079            |
| Taxation                                      | (3,793)           | (6,374)          | (4,699)          | (4,346)          | (4,906)          | (3,646)          | (3,574)          | (3,999)          |
| <b>Profit after taxation</b>                  | <b>6,102</b>      | <b>9,725</b>     | <b>6,690</b>     | <b>6,519</b>     | <b>7,690</b>     | <b>5,612</b>     | <b>5,595</b>     | <b>5,080</b>     |
| <b>Statement of Financial Position</b>        |                   |                  |                  |                  |                  |                  |                  |                  |
| <b>Assets</b>                                 |                   |                  |                  |                  |                  |                  |                  |                  |
| Cash and balances with treasury banks         | 122,181           | 127,513          | 144,168          | 94,130           | 132,705          | 106,039          | 136,930          | 107,291          |
| Balances with other banks                     | 24,030            | 29,693           | 14,701           | 15,170           | 12,542           | 13,882           | 15,521           | 11,889           |
| Lendings to financial institutions            | 17,139            | 2,140            | 2,057            | 9,577            | 1,090            | 6,102            | 4,307            | 201,883          |
| Investments                                   | 1,015,869         | 964,412          | 928,708          | 836,660          | 748,765          | 864,430          | 793,510          | 450,253          |
| Advances                                      | 462,942           | 445,039          | 460,611          | 480,925          | 496,679          | 490,255          | 514,143          | 500,205          |
| Fixed assets                                  | 58,028            | 57,739           | 57,586           | 58,020           | 58,271           | 47,614           | 47,489           | 41,779           |
| Intangible assets                             | 938               | 836              | 881              | 941              | 958              | 912              | 627              | 677              |
| Other assets                                  | 56,334            | 47,498           | 58,893           | 59,795           | 64,143           | 52,259           | 60,870           | 51,086           |
|                                               | <b>1,757,462</b>  | <b>1,674,869</b> | <b>1,667,604</b> | <b>1,555,216</b> | <b>1,515,152</b> | <b>1,581,493</b> | <b>1,573,398</b> | <b>1,365,064</b> |
| <b>Liabilities</b>                            |                   |                  |                  |                  |                  |                  |                  |                  |
| Bills payable                                 | 23,981            | 9,951            | 10,504           | 7,972            | 11,822           | 9,315            | 10,514           | 10,378           |
| Borrowings                                    | 164,002           | 112,373          | 113,230          | 88,652           | 89,506           | 200,398          | 183,982          | 70,235           |
| Deposits and other accounts                   | 1,289,502         | 1,274,870        | 1,274,682        | 1,184,139        | 1,144,763        | 1,145,140        | 1,148,631        | 1,066,013        |
| Sub-ordinated loan                            | -                 | -                | -                | -                | -                | -                | -                | 3,891            |
| Deferred tax liabilities                      | 6,975             | 6,497            | 11,804           | 10,425           | 5,851            | 2,327            | 820              | 2,203            |
| Other liabilities                             | 82,901            | 85,803           | 72,498           | 85,382           | 94,296           | 70,627           | 79,072           | 61,905           |
|                                               | <b>1,567,361</b>  | <b>1,489,494</b> | <b>1,482,719</b> | <b>1,376,570</b> | <b>1,346,237</b> | <b>1,427,807</b> | <b>1,423,018</b> | <b>1,214,626</b> |
| <b>Net assets</b>                             | <b>190,102</b>    | <b>185,376</b>   | <b>184,886</b>   | <b>178,646</b>   | <b>168,915</b>   | <b>153,686</b>   | <b>150,380</b>   | <b>150,438</b>   |
| <b>Represented by:</b>                        |                   |                  |                  |                  |                  |                  |                  |                  |
| Share capital                                 | 11,851            | 11,851           | 11,851           | 11,851           | 11,851           | 11,851           | 11,851           | 11,851           |
| Reserves                                      | 80,696            | 80,558           | 79,712           | 78,843           | 77,591           | 76,968           | 76,833           | 74,984           |
| Unappropriated profit                         | 69,835            | 62,924           | 54,122           | 55,742           | 55,777           | 53,486           | 53,162           | 53,377           |
| Surplus on revaluation of assets - net of tax | 27,720            | 30,043           | 39,201           | 32,211           | 23,695           | 11,382           | 8,534            | 10,227           |
|                                               | <b>190,102</b>    | <b>185,376</b>   | <b>184,886</b>   | <b>178,646</b>   | <b>168,915</b>   | <b>153,686</b>   | <b>150,380</b>   | <b>150,438</b>   |

Quarterly PBT (Rupees in Billion)

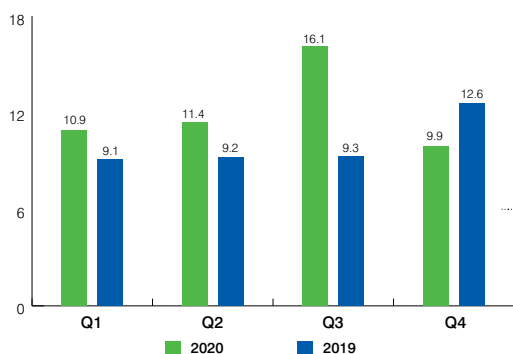

Quarterly NIM (Rupees in Billion)

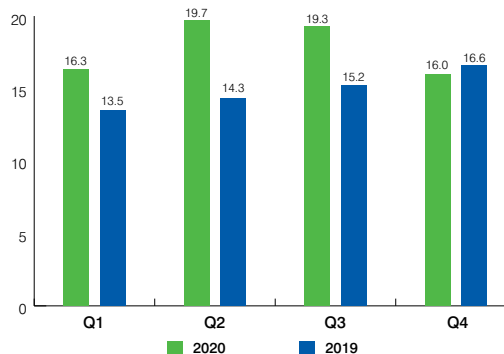

## Quarterly Performance Analysis - 2020 & 2019

| Quarter   | Net Interest Income                                                                                                                                                                                                                                                                                                                                                                                                                                                                                                                                                                                                                                                                                                                                                                                                      | Non Interest Income                                                                                                                                                                                                                                                                                                                                                                                                                                                                                                                 | Non Markup Expenses                                                                                                                                                                                                                                                                                                                                                               | Profit                                                                                                                                                                                                                                                                                                                                                                                                                                                            |
|-----------|--------------------------------------------------------------------------------------------------------------------------------------------------------------------------------------------------------------------------------------------------------------------------------------------------------------------------------------------------------------------------------------------------------------------------------------------------------------------------------------------------------------------------------------------------------------------------------------------------------------------------------------------------------------------------------------------------------------------------------------------------------------------------------------------------------------------------|-------------------------------------------------------------------------------------------------------------------------------------------------------------------------------------------------------------------------------------------------------------------------------------------------------------------------------------------------------------------------------------------------------------------------------------------------------------------------------------------------------------------------------------|-----------------------------------------------------------------------------------------------------------------------------------------------------------------------------------------------------------------------------------------------------------------------------------------------------------------------------------------------------------------------------------|-------------------------------------------------------------------------------------------------------------------------------------------------------------------------------------------------------------------------------------------------------------------------------------------------------------------------------------------------------------------------------------------------------------------------------------------------------------------|
| Quarter 1 | <p>During the 1<sup>st</sup> quarter of 2020, Net Interest Income (NII) of the Bank grew by 21% and was reported at Rs. 16,308 billion. Markup income on investments depicted a significant increase of 80% over the corresponding period due to volumetric increase in average balances and higher market yields amidst a rising yield curve; in turn contributing 63% to the total gross markup income and amounting to Rs. 24,598 billion. The income on advances contributed 36% to the total mix and amounted to Rs. 14,221 billion.</p> <p>On the markup expense side, Rs. 19,669 billion was reported on account of markup on deposits; representing an increase of 56% over the corresponding period owing primarily to higher minimum deposit rates and volumetric growth in average outstanding balances.*</p> | <p>Non Mark up Income for the 1<sup>st</sup> quarter was reported at Rs. 3,888 billion against Rs. 3,514 billion reported in the corresponding period; representing an increase of 11%. FX income contributed 76% to the total increase whereas higher gain on sale of securities contributed 16% to the increase.</p>                                                                                                                                                                                                              | <p>Non Markup expenses grew by 2% over the corresponding period. Despite surge in inflationary pressures, the Bank was able to contain growth in operating expenses and reported a net decrease of Rs. 24 million as compared to corresponding period. The control in the operating expense base is resultant of the expense management drive undertaken by the Bank in 2019.</p> | <p>Profit before tax grew by 20% in 1<sup>st</sup> quarter primarily on the back of improving margins. Profit after tax grew by 28% and was recorded at Rs. 6,519 million.</p>                                                                                                                                                                                                                                                                                    |
| Quarter 2 | <p>NII during the 2<sup>nd</sup> quarter was reported at Rs. 19,705 billion; higher by 38% as compared to the corresponding period on the back of improving net interest margins. Gross markup income increased by 14%, owing to rising income on investments, whereas the gross markup expense declined slightly by 6% as the easing monetary policy stance adopted by the SBP amidst the COVID-19 outbreak led to a lowering of the minimum deposit rates.</p>                                                                                                                                                                                                                                                                                                                                                         | <p>Non Mark up Income for the 2<sup>nd</sup> quarter was reported at Rs. 3,195 billion; posting a decline of 28% over the corresponding period. The decline was mainly on account of lowering dividend and foreign exchange income amounting to Rs. 310 million and Rs. 703 million respectively (Q2 2019: 521 million and 1,286 million) as realization of various systematic and idiosyncratic factors amidst the COVID-19 outbreak, including branch closures and a slowing economic activity, impacted banks income stream.</p> | <p>Non markup expenses closed the period in line with the 1<sup>st</sup> quarter; witnessing a slight decline of 0.76%.</p>                                                                                                                                                                                                                                                       | <p>Profit before tax for the 2<sup>nd</sup> quarter was reported at Rs. 11,389 billion as compared to Rs. 9,169 billion for the corresponding period; higher by 24% mainly due to increasing NII and sustained flat trend in non markup expenses. The increase was offset by the recording of higher general provision against advances and a declining non markup income. Profit after tax hence grew by 19.6% and was recorded at Rs. 6,690 billion.</p>        |
| Quarter 3 | <p>NII during the 3<sup>rd</sup> quarter was reported at Rs. 19,333 billion; higher by 27% as compared to the corresponding period. Amidst a declining yield curve, the repricing lag between earning assets and liabilities contributed to the improved net interest margins.</p>                                                                                                                                                                                                                                                                                                                                                                                                                                                                                                                                       | <p>Non Mark up Income posted a significant increase of 85%, amounting to Rs. 2,982 billion, as proactive duration management of the investment portfolio resulted in capital gains of Rs. 2,861 billion recognized during the quarter under review.</p>                                                                                                                                                                                                                                                                             | <p>Non markup expenses closed the period in line with the 2<sup>nd</sup> quarter; witnessing a slight decline of 0.1%.</p>                                                                                                                                                                                                                                                        | <p>Profit before Tax has increased to Rs. 16,099 billion as compared to Rs. 9,257 billion in the comparative period. The significant factors contributing to the higher profit in 3<sup>rd</sup> quarter was increasing NII and realization of capital gains on the investment portfolio. The increase was slightly offset by higher provisioning against advances and investments. Profit after tax hence grew by 73% and was recorded at Rs. 9,725 billion.</p> |
| Quarter 4 | <p>NII during the 4<sup>th</sup> quarter is 4% lower than the NII reported in the comparative period. The decline is on account of lowering interest margins as the benefits of repricing lag between earning assets and liabilities subsided. Gross markup income declined by 27% whereas the markup expense declined by 44%.</p>                                                                                                                                                                                                                                                                                                                                                                                                                                                                                       | <p>Non Mark up Income declined to Rs. 4,577 billion compared to Rs. 5,226 billion reported in the corresponding period mainly on account of lower capital gains; hence depicting a decline of 12%.</p>                                                                                                                                                                                                                                                                                                                              | <p>Non markup expenses posted a slight increase of 1% and closed the quarter at Rs. 8,465 billion.</p>                                                                                                                                                                                                                                                                            | <p>Declining NII and non markup income resulted in decrease in reported profit before tax; which closed the quarter at Rs. 9,895 billion against Rs. 12,596 billion reported in the corresponding period. Profit after tax hence reached Rs. 6,102 billion with a reported decline of 21%</p>                                                                                                                                                                     |

Non Markup Expense (Rupees in Billion)

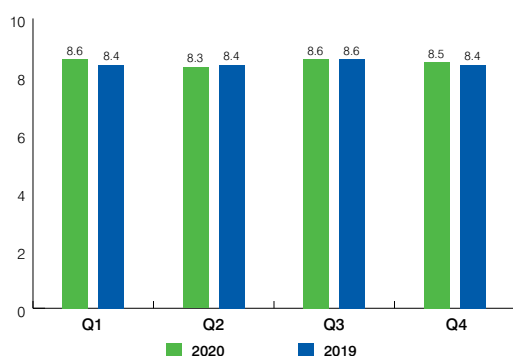

Non Markup Income (Rupees in Billion)

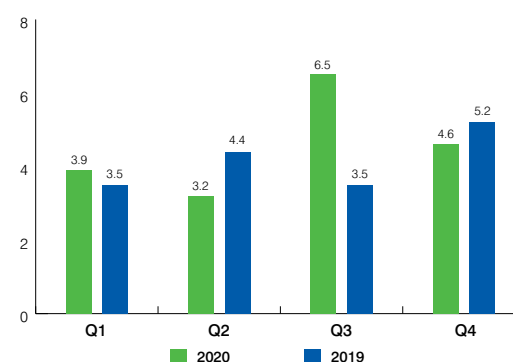

## Six Years' Financial Performance / Financial Ratios 2015 - 2020

|                                           |        | 2020    | 2019    | 2018    | 2017   | 2016   | 2015   |
|-------------------------------------------|--------|---------|---------|---------|--------|--------|--------|
| <b>PROFIT AND LOSS ACCOUNT</b>            |        |         |         |         |        |        |        |
| Mark-up/ return earned                    | Rs. Mn | 136,076 | 138,292 | 83,319  | 74,091 | 67,400 | 80,393 |
| Mark-up/ return expensed                  | "      | 64,741  | 78,676  | 37,305  | 31,429 | 23,586 | 31,077 |
| Fund based income                         | "      | 71,334  | 59,616  | 46,014  | 42,662 | 43,814 | 49,316 |
| Fee, Commission, brokerage & FX income    | "      | 13,594  | 14,469  | 14,625  | 11,435 | 9,040  | 10,871 |
| Dividend and capital gains                | "      | 4,542   | 2,210   | 2,573   | 6,682  | 7,135  | 5,695  |
| Total income                              | "      | 89,470  | 76,295  | 63,212  | 60,780 | 59,989 | 65,882 |
| Operating expenses                        | "      | 33,908  | 33,709  | 32,902  | 28,721 | 22,989 | 22,895 |
| Operating profit before tax and provision | "      | 55,562  | 42,586  | 30,310  | 32,059 | 36,999 | 42,987 |
| Provisions / write-offs                   | "      | 7,313   | 2,484   | (1,753) | 1,045  | 925    | 659    |
| Profit before tax                         | "      | 48,249  | 40,102  | 32,064  | 31,014 | 36,075 | 42,329 |
| Profit after tax                          | "      | 29,037  | 23,977  | 21,360  | 22,459 | 21,891 | 25,546 |
| Cash Dividends                            | "      | 23,701  | 20,146  | 18,961  | 18,673 | 17,808 | 17,808 |

### Statement of Financial Position

|                                               |   |           |           |           |           |           |           |
|-----------------------------------------------|---|-----------|-----------|-----------|-----------|-----------|-----------|
| Authorised capital                            | " | 15,000    | 15,000    | 15,000    | 15,000    | 15,000    | 15,000    |
| Paid up capital                               | " | 11,851    | 11,851    | 11,851    | 11,851    | 11,130    | 11,130    |
| Reserves                                      | " | 80,696    | 77,591    | 74,148    | 70,866    | 53,347    | 51,309    |
| Unappropriated Profit                         | " | 69,835    | 55,777    | 53,532    | 53,776    | 53,469    | 50,747    |
| Shareholder's equity                          | " | 162,382   | 145,219   | 139,531   | 136,493   | 117,946   | 113,186   |
| Surplus on revaluation of assets - net of tax | " | 27,720    | 23,695    | 9,747     | 17,073    | 23,680    | 24,616    |
| Net Assets                                    | " | 190,102   | 168,915   | 149,278   | 153,566   | 141,627   | 137,802   |
| Total Assets                                  | " | 1,757,462 | 1,515,152 | 1,498,130 | 1,343,238 | 1,072,365 | 1,004,410 |
| Earning Assets                                | " | 1,544,536 | 1,294,096 | 1,343,378 | 1,175,352 | 911,163   | 872,594   |
| Gross Advances                                | " | 513,550   | 540,037   | 546,792   | 515,058   | 367,678   | 322,529   |
| Advances - net of provisions                  | " | 462,942   | 496,679   | 503,581   | 469,356   | 348,117   | 304,122   |
| Non-Performing Loans (NPLs)                   | " | 51,189    | 49,424    | 48,956    | 48,753    | 21,688    | 20,368    |
| Investments                                   | " | 1,015,869 | 748,765   | 749,369   | 656,964   | 555,929   | 565,696   |
| Total Liabilities                             | " | 1,567,361 | 1,346,237 | 1,348,852 | 1,189,672 | 930,739   | 866,608   |
| Deposits & other accounts                     | " | 1,289,502 | 1,144,763 | 1,049,038 | 968,483   | 781,430   | 696,805   |
| Current & Saving Deposits (CASA)              | " | 1,198,785 | 1,035,063 | 954,813   | 899,364   | 735,550   | 650,739   |
| Borrowings                                    | " | 164,002   | 89,506    | 216,019   | 133,070   | 74,515    | 118,040   |
| Interest bearing Liabilities                  | " | 964,119   | 809,717   | 867,048   | 728,361   | 557,913   | 557,056   |
| Contingencies and Commitments                 | " | 714,038   | 851,147   | 584,434   | 448,135   | 307,566   | 320,888   |

### Profitability ratios

|                                                                     |   |        |        |        |        |        |        |
|---------------------------------------------------------------------|---|--------|--------|--------|--------|--------|--------|
| Profit before tax ratio                                             | % | 35.46% | 29.00% | 38.48% | 41.86% | 53.52% | 52.65% |
| Gross Yield on Average Earning Assets                               | " | 9.59%  | 10.49% | 6.41%  | 7.10%  | 7.56%  | 9.51%  |
| Gross Yield on Avg. Earning Assets (incl. dividend & capital gains) | " | 9.91%  | 10.65% | 6.61%  | 7.74%  | 8.36%  | 10.18% |
| Gross Spread                                                        | " | 52.42% | 43.11% | 55.23% | 57.58% | 65.01% | 61.34% |
| Non interest income to total income                                 | " | 20.27% | 21.86% | 27.21% | 29.81% | 26.96% | 25.14% |
| Return on average equity (ROE)                                      | " | 18.88% | 16.84% | 15.48% | 17.65% | 18.94% | 23.21% |
| Return on average assets (ROA)                                      | " | 1.77%  | 1.59%  | 1.50%  | 1.86%  | 2.16%  | 2.63%  |
| Return on Capital Employed (ROCE)                                   | " | 18.88% | 16.84% | 15.48% | 17.65% | 18.94% | 23.21% |
| Cost to income ratio                                                | " | 36.49% | 42.82% | 50.77% | 46.00% | 36.80% | 32.17% |
| Admin Exp to Profit before Tax                                      | " | 68.37% | 82.58% | 98.07% | 91.99% | 61.19% | 51.90% |

### Investment ratios/Market Ratios

|                                                                                                                  |       |        |        |        |        |        |        |
|------------------------------------------------------------------------------------------------------------------|-------|--------|--------|--------|--------|--------|--------|
| Earnings per share (after tax)                                                                                   | Rs.   | 24.50  | 20.23  | 18.02  | 19.56  | 19.67  | 22.95  |
| Earnings per share (before tax)                                                                                  | "     | 40.71  | 33.84  | 27.06  | 27.02  | 32.41  | 38.03  |
| Breakup value per share                                                                                          |       |        |        |        |        |        |        |
| - without surplus on revaluation of fixed assets & investments                                                   | "     | 137.02 | 122.54 | 117.74 | 115.18 | 105.97 | 101.69 |
| - without surplus on revaluation of fixed assets                                                                 | "     | 144.35 | 126.47 | 115.68 | 119.17 | 116.10 | 114.09 |
| - with surplus on revaluation of fixed assets & investments                                                      | "     | 160.42 | 142.54 | 125.97 | 129.59 | 127.24 | 123.81 |
| - with surplus on revaluation of fixed assets & investments & investment in related party at fair / market value | "     | 162.77 | 144.89 | 128.41 | 132.90 | 132.90 | 128.63 |
| Cash Dividend                                                                                                    | %     | 200%   | 170%   | 160%   | 160%   | 160%   | 160%   |
| Dividend Yield ratio (based on cash dividend)                                                                    | "     | 10.79% | 8.30%  | 8.27%  | 7.54%  | 6.73%  | 7.38%  |
| Dividend Payout ratio                                                                                            | "     | 81.62% | 84.02% | 88.77% | 81.86% | 81.35% | 69.71% |
| Price to book value ratio                                                                                        | Times | 1.35   | 1.67   | 1.64   | 1.84   | 2.24   | 2.14   |
| Price to earning ratio                                                                                           | "     | 7.56   | 10.13  | 10.74  | 10.85  | 12.09  | 9.45   |
| Dividend cover ratio                                                                                             | "     | 1.23   | 1.19   | 1.13   | 1.18   | 1.23   | 1.43   |

## Six Years' Financial Performance / Financial Ratios 2015 - 2020

|                                                |         | 2020      | 2019      | 2018      | 2017      | 2016      | 2015      |
|------------------------------------------------|---------|-----------|-----------|-----------|-----------|-----------|-----------|
| <b>Share Information</b>                       |         |           |           |           |           |           |           |
| Market value per share - Dec 31                | Rs.     | 185.28    | 204.94    | 193.57    | 212.32    | 237.82    | 216.85    |
| High - during the year                         | "       | 224.53    | 216.20    | 236.56    | 262.10    | 244.82    | 338.82    |
| Low - during the year                          | "       | 132.89    | 154.04    | 177.16    | 190.43    | 190.20    | 205.34    |
| Market Capitalisation                          | Rs. Mln | 219,568   | 242,866   | 229,392   | 251,612   | 264,701   | 241,361   |
| <b>Asset Quality and Liquidity ratios</b>      |         |           |           |           |           |           |           |
| Gross Advances to deposits ratio               | %       | 39.83%    | 47.17%    | 52.12%    | 53.18%    | 47.07%    | 46.29%    |
| Net Advances to deposits ratio                 | "       | 35.90%    | 43.39%    | 48.00%    | 48.46%    | 44.55%    | 43.65%    |
| Investments to deposits ratio                  | "       | 78.78%    | 65.41%    | 71.43%    | 67.83%    | 71.14%    | 81.18%    |
| Weighted Average Cost of Deposits              | "       | 4.53%     | 5.70%     | 3.18%     | 2.53%     | 2.48%     | 3.37%     |
| CASA to total deposits                         | "       | 92.96%    | 90.42%    | 91.02%    | 92.86%    | 94.13%    | 93.39%    |
| NPLs to Gross advances ratio                   | "       | 9.97%     | 9.15%     | 8.95%     | 9.47%     | 5.90%     | 6.32%     |
| NPLs to Shareholders Equity                    | "       | 31.52%    | 34.03%    | 35.09%    | 35.72%    | 18.39%    | 18.00%    |
| Coverage Ratio (specific provision/ NPLs)      | "       | 88.19%    | 84.85%    | 85.68%    | 91.46%    | 87.32%    | 87.63%    |
| Coverage Ratio (total provision/ NPLs)         | "       | 98.87%    | 87.73%    | 88.26%    | 93.74%    | 90.82%    | 90.37%    |
| Earning assets to total assets ratio           | "       | 87.88%    | 85.41%    | 89.67%    | 87.50%    | 84.98%    | 86.88%    |
| Investments to total assets ratio              | "       | 57.80%    | 49.42%    | 50.02%    | 48.91%    | 51.84%    | 56.32%    |
| Cash & Cash Equivalents to Total Assets        | "       | 8.30%     | 9.59%     | 7.61%     | 8.16%     | 7.31%     | 6.34%     |
| Cash to Current Liabilities                    | "       | 6.30%     | 5.39%     | 3.44%     | 5.07%     | 7.78%     | 5.96%     |
| Earning assets to interest bearing Liabilities | Times   | 1.60      | 1.60      | 1.55      | 1.61      | 1.63      | 1.57      |
| Deposits to shareholder equity                 | "       | 7.94      | 7.88      | 7.52      | 7.10      | 6.63      | 6.16      |
| Assets to Equity                               | "       | 10.82     | 10.43     | 10.74     | 9.84      | 9.09      | 8.87      |
| Current / Quick Ratio                          | "       | 2.38      | 2.29      | 1.91      | 2.01      | 3.05      | 2.44      |
| <b>Risk Adequacy</b>                           |         |           |           |           |           |           |           |
| Tier I Capital                                 | Rs. Mln | 152,901   | 136,257   | 128,999   | 129,130   | 111,999   | 107,067   |
| Total Eligible Capital                         | "       | 188,409   | 163,611   | 145,987   | 147,227   | 128,968   | 120,930   |
| Risk Weighted Assets (RWA)                     | "       | 897,938   | 867,478   | 805,177   | 895,415   | 667,195   | 622,323   |
| Tier I to RWA                                  | %       | 17.03%    | 15.71%    | 16.02%    | 14.42%    | 16.79%    | 17.20%    |
| RWA to total assets                            | "       | 51.09%    | 57.25%    | 53.75%    | 66.66%    | 62.22%    | 61.96%    |
| Capital Adequacy Ratio                         | "       | 20.98%    | 18.86%    | 18.13%    | 16.44%    | 19.33%    | 19.43%    |
| Net Return on Average RWA                      | "       | 3.29%     | 2.87%     | 2.51%     | 2.87%     | 3.40%     | 4.26%     |
| <b>Duo Pont Analysis</b>                       |         |           |           |           |           |           |           |
| Net Operating Margin                           | %       | 32.45%    | 31.43%    | 33.79%    | 36.95%    | 36.49%    | 38.78%    |
| Asset Utilization                              | %       | 5.47%     | 5.06%     | 4.45%     | 5.03%     | 5.78%     | 6.80%     |
| Leverage Ratio / Equity Multiplier             | Times   | 10.64     | 10.58     | 10.29     | 9.49      | 8.99      | 8.81      |
| <b>Industry Share</b>                          |         |           |           |           |           |           |           |
| Deposits                                       | %       | 7.21%     | 7.82%     | 7.86%     | 7.83%     | 6.98%     | 7.20%     |
| Advances                                       | "       | 6.04%     | 6.62%     | 6.93%     | 7.89%     | 6.60%     | 6.58%     |
| Market Capitalisation                          | "       | 16.87%    | 17.17%    | 17.85%    | 14.86%    | 17.91%    |           |
| <b>Consolidated</b>                            |         |           |           |           |           |           |           |
| Total Assets                                   | Rs. Mln | 1,891,276 | 1,612,215 | 1,585,210 | 1,389,492 | 1,097,281 | 1,020,980 |
| Shareholders' Equity                           | "       | 163,409   | 145,854   | 140,196   | 138,100   | 120,152   | 115,253   |
| Net Assets                                     | "       | 192,991   | 171,347   | 151,323   | 156,543   | 145,960   | 142,177   |
| Profit before tax                              | "       | 49,318    | 40,154    | 30,806    | 30,614    | 36,721    | 42,789    |
| Profit after tax                               | "       | 29,562    | 23,947    | 20,415    | 22,048    | 22,174    | 25,035    |
| Return on Average Assets                       | %       | 1.69%     | 1.50%     | 1.37%     | 1.77%     | 2.14%     | 2.55%     |
| Return on Average Equity                       | "       | 19.02%    | 16.66%    | 14.60%    | 16.98%    | 19.18%    | 22.12%    |
| Earnings per share                             | Rs.     | 24.82     | 20.14     | 17.17     | 19.13     | 19.82     | 22.38     |
| Breakup value per share                        | "       | 162.85    | 144.59    | 127.69    | 132.10    | 131.14    | 127.74    |
| Capital Adequacy Ratio                         | %       | 19.69%    | 17.84%    | 17.02%    | 16.34%    | 19.68%    | 20.07%    |
| <b>Per Branch</b>                              |         |           |           |           |           |           |           |
| Gross Advances                                 | Rs. Mln | 359.38    | 383.01    | 394.23    | 356.69    | 297.10    | 263.72    |
| Deposits                                       | "       | 902.38    | 811.89    | 756.34    | 670.69    | 631.20    | 569.75    |
| CASA                                           | "       | 838.90    | 734.09    | 688.40    | 622.83    | 594.14    | 532.08    |
| PBT                                            | "       | 33.76     | 28.44     | 23.12     | 21.48     | 29.14     | 34.61     |

## Six Years' Non-Financial Performance 2015 - 2020

|                            |          | 2020      | 2019      | 2018      | 2017      | 2016      | 2015      |
|----------------------------|----------|-----------|-----------|-----------|-----------|-----------|-----------|
| No. of accounts            | Absolute | 8,217,065 | 8,223,038 | 7,854,928 | 7,607,277 | 6,549,452 | 6,074,103 |
| No. of branches            | "        | 1,429     | 1,410     | 1,387     | 1,444     | 1,238     | 1,223     |
| No. of permanent employees | "        | 13,643    | 13,596    | 12,860    | 13,155    | 11,088    | 10,532    |

### Digital Banking

|                                                       |          |         |         |         |         |         |         |
|-------------------------------------------------------|----------|---------|---------|---------|---------|---------|---------|
| No. of ATMs                                           | Absolute | 1,434   | 1,360   | 1,321   | 1,377   | 1,191   | 1,073   |
| No. of Debit cards/smart cards issued during the year | "        | 577,406 | 652,440 | 783,233 | 772,314 | 666,999 | 642,649 |

### Internet Banking

|                        |         |         |         |         |         |         |         |
|------------------------|---------|---------|---------|---------|---------|---------|---------|
| No. of customers       | "       | 198,939 | 180,326 | 176,210 | 163,273 | 144,069 | 125,621 |
| No. of transactions    | "       | 691,553 | 479,278 | 481,137 | 509,569 | 450,333 | 358,547 |
| Volume of transactions | Rs. Mln | 29,200  | 18,452  | 14,859  | 12,306  | 7,971   | 6,149   |

### Mobile Banking

|                                 |          |           |           |           |           |           |           |
|---------------------------------|----------|-----------|-----------|-----------|-----------|-----------|-----------|
| No. of customers                | Absolute | 1,396,475 | 1,909,712 | 1,363,304 | 1,232,258 | 931,965   | 656,485   |
| No. of transactions - financial | "        | 2,793,156 | 2,074,367 | 2,354,765 | 1,689,324 | 1,487,899 | 1,377,762 |
| Volume of transactions          | Rs. Mln  | 78,674    | 50,261    | 48,623    | 24,597    | 15,018    | 14,842    |

### Credit Cards

|                                  |          |        |        |        |        |        |        |
|----------------------------------|----------|--------|--------|--------|--------|--------|--------|
| No. of new issuance              | Absolute | 13,944 | 16,907 | 15,245 | 13,006 | 11,060 | 10,647 |
| No. of customers                 | "        | 84,542 | 83,070 | 77,190 | 70,246 | 64,075 | 59,343 |
| Total spend (transaction volume) | Rs. Mln  | 8,327  | 8,927  | 7,597  | 7,054  | 5,967  | 5,079  |

### Auto Loan

|                        |          |        |        |        |        |        |       |
|------------------------|----------|--------|--------|--------|--------|--------|-------|
| No. of Loans disbursed | Absolute | 5,549  | 5,999  | 8,266  | 8,977  | 6,751  | 5,565 |
| Outstanding Volume     | Rs. Mln  | 19,777 | 17,929 | 18,134 | 16,416 | 10,811 | 8,256 |

### Home Loan

|                        |          |       |       |       |       |       |       |
|------------------------|----------|-------|-------|-------|-------|-------|-------|
| No. of Loans disbursed | Absolute | 67    | 62    | 108   | 64    | 44    | 21    |
| Outstanding Volume     | Rs. Mln  | 4,733 | 4,110 | 4,116 | 2,909 | 1,887 | 1,710 |

### Personal Loan

|                        |          |       |       |       |       |     |     |
|------------------------|----------|-------|-------|-------|-------|-----|-----|
| No. of Loans disbursed | Absolute | 1,764 | 2,435 | 2,766 | 1,313 | 316 | 231 |
| Outstanding Volume     | Rs. Mln  | 1,912 | 2,262 | 2,707 | 2,630 | 531 | 518 |

### Bancassurance

|                       |          |         |         |         |         |        |        |
|-----------------------|----------|---------|---------|---------|---------|--------|--------|
| No. of customers      | Absolute | 232,035 | 196,633 | 152,145 | 119,474 | 95,434 | 72,553 |
| No. of new customers  | "        | 35,402  | 44,021  | 32,671  | 24,040  | 22,881 | 17,142 |
| No. of policies       | "        | 35,791  | 44,208  | 33,110  | 26,590  | 23,223 | 17,189 |
| Bancassurance Premium | Rs. Mln  | 9,654   | 8,927   | 7,060   | 6,133   | 4,953  | 4,193  |

### Trade

|                  |         |         |         |         |         |         |         |
|------------------|---------|---------|---------|---------|---------|---------|---------|
| Imports - volume | Rs. Mln | 577,281 | 563,914 | 483,932 | 416,489 | 371,233 | 359,860 |
| Exports - volume | "       | 332,396 | 356,549 | 302,500 | 220,912 | 162,899 | 170,032 |

### Home Remittance

|                                  |         |         |         |         |         |         |         |
|----------------------------------|---------|---------|---------|---------|---------|---------|---------|
| Volume of home remittance        | USD Mln | 3,206   | 3,051   | 3,064   | 2,281   | 2,220   | 2,096   |
| Volume of home remittance        | Rs. Mln | 518,882 | 455,862 | 374,431 | 240,478 | 232,340 | 213,755 |
| Home Remittance MCB Market Share | %       | 12.35%  | 13.74%  | 14.88%  | 11.64%  | 11.30%  | 10.90%  |

### Cash Management

|                           |         |           |           |           |           |           |           |
|---------------------------|---------|-----------|-----------|-----------|-----------|-----------|-----------|
| Volume of cash collection | Rs. Mln | 2,082,095 | 1,884,135 | 1,673,812 | 1,500,553 | 1,210,303 | 1,024,595 |
|---------------------------|---------|-----------|-----------|-----------|-----------|-----------|-----------|



## Six Years' - Performance Commentary 2015 - 2020

In this section, commentary on the six years' performance of the Bank is being provided, covering key highlights;

### Statement of Financial Position

#### Total Assets:

The asset base of the Bank has registered a remarkable compounded annual growth rate (CAGR) of 11.10% over the last 6 years; growing to Rs. 1,757 billion as at December 31, 2020. Prime contributors to the said increase have been advances and investments, with investments growing annually by approximately 12.42% while gross advances growing by 9.75%. The earning asset mix of the Bank has been prudently managed to ensure maximization of returns to the stakeholders. In 2017, based on the strategic move, NIB Bank was merged with and into MCB Bank Limited resulting in a significant increase in assets of 25%. Furthermore in 2018, 90 branches of the Bank were transferred to a wholly owned subsidiary of the Bank i.e. MCB Islamic Bank Limited. In 2020, the Bank recorded a net growth of Rs.242 billion in total assets (16%) over 2019.

#### Advances:

Amidst the COVID-19 outbreak, evolving macro-economic factors made the operating environment more challenging; the discount rate registering a decrease of 625bps in the year 2020. A subdued domestic credit appetite coupled with growing risks surrounding asset quality and a limited number of credit extension opportunities within the Bank's defined risk appetite resulted in a decline in the gross advance base during the year 2020. Over the cumulative period of 6 years, however, the expansionary economic cycle witnessed in the middle part of the time analysis together with realization of MCB's merger with the NIB bank has reflected in positive growth numbers for MCB. Gross advances have grown at a CAGR of 9.75 % over the last 6 years.

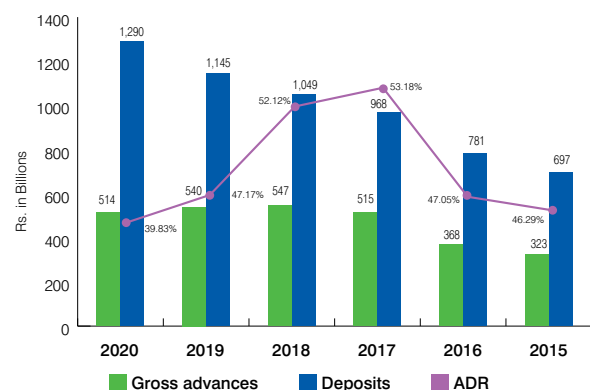

#### Non-performing Loans:

Strengthened risk management policies coupled with refined appetite has enabled the Bank to keep a check on the quality of its assets. Bank continued with the trend of posting significant recoveries and posted a recovery of Rs. 2.4 billion in 2020. The infection ratio of the Bank

was 8.68% as at December 31, 2013 which improved to 5.90% as at December 31, 2016. However, transfer of NPL stock from NIB Bank i.e. Rs. 29.650 billion had increased the infection ratio to 9.47% as at December 31, 2017. In 2020, the infection ratio deteriorated slightly to 9.97% on account of subjective classifications undertaken by the Bank on a prudent basis and decrease in gross advances base. The coverage ratio of the Bank has improved from 90.37% as at December 31, 2015 to 98.87% as at December 31, 2020. NPLs classified in "loss" category constitute more than 98.94% of the NPLs base as at December 31, 2020. This specifies the adequacy of provision held in the books of the Bank.

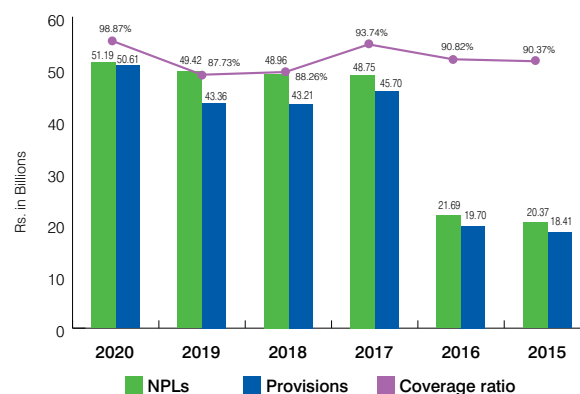

#### Investments:

During the past few years, the lack of credit opportunities resulted in banking sector liquidity being deployed in Government Papers as Government's borrowing appetite has continued to grow. With an average annual growth rate of 12.42% over the last six years, the investment base of the Bank has grown from Rs. 566 billion as at December 31, 2015 to Rs. 1,016 billion as at December 31, 2020. The duration of the investment portfolio has been proactively monitored amidst the evolving yield curve scenario to maximize returns and optimize liquidity management. The equity book of the Bank consists of investments in diverse companies with strong fundamentals with a view to earn stable dividends

#### Deposits:

The deposit base of the Bank has nearly doubled over the last six years, surpassing the landmark of PKR 1 trillion in 2018, with the absolute number increasing from Rs. 697 billion as at December 31, 2015 to Rs. 1,290 billion as at December 31, 2020. CAGR of 13.10% has been maintained over the past 6 years. CASA base has registered a remarkable increase in the last 6 years, increasing from Rs. 651 billion as at December 31, 2015 to Rs. 1,199 billion as at December 31, 2020. This has been strategically achieved through service excellence, strategically placed touch points for the customers and transactional convenience provided through a vast range of diversified products.

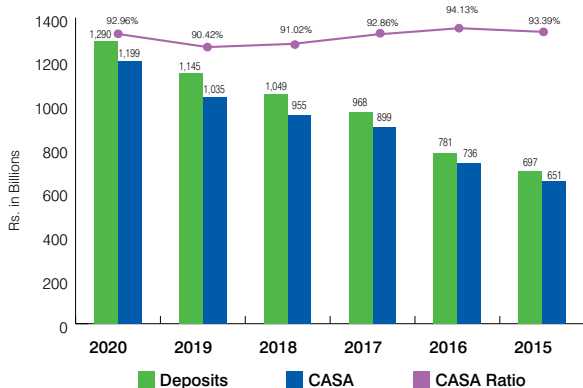

### Equity and Dividends

- The paid-up capital of the Bank has grown from Rs. 11.13 billion as at December 2015 to Rs. 11.8 billion as at December 31, 2020, meeting the statutory capital requirements set by the State Bank of Pakistan (SBP).
- In 2008, most affluent strategic partnership occurred in Pakistan where the largest Bank of Malaysia, Maybank Berhad, acquired 20% holding in MCB Bank Limited (current holding of 18.78% as holding diluted due to issuance of shares under the merger scheme). In 2017, Fullerton Financial Holdings (International) of Singapore through Bugis Investments (Mauritius) Pte Ltd acquired 5.49% stake in MCB under merger scheme of NIB Bank with and into MCB Bank Limited.
- The equity base of the Bank is reflective of the outstanding financial results achieved through consistent performance posted over the years. The capital base of the Bank is rated as strong which is substantiated by the reported CAR of 20.98% as at December 31, 2020 against the statutory requirement of 11.50%. The Shareholders' equity has grown significantly from Rs. 113 billion as at December 31, 2015 to Rs. 162 billion as at December 31, 2020.
- The Bank has the highest cash dividend per share in the industry with regular interim dividends and remains one of the prime stocks preferred in the Pakistani equity markets.

## Profit and Loss account

### Net Interest Margin

- The composition of markup income has seen a shift in the last six years on the back of concentration shift in the earning asset base of the Bank. The contribution from markup income earned on advances in the total income mix had increased from 32.50% in 2015 to 41.46% in 2019 while the contribution from markup income on investments declined from 67.18% to 54.58% over the same period. However, diversion of excess liquidity towards the investment book due to lack of good credit opportunities has diluted the concentration of advances related markup income in the total income mix; the contribution falling down to 31.51% in 2020 while the contribution from markup income on investments has increased to 67.60% in 2020.

- The investment to total asset ratio has increased slightly from 56.32% in 2015 to 57.80% in 2020; whereas, the advances to total asset ratio has decreased by 4% from the base year. Gross yield on average assets has also improved over the years and closed at 9.59% in 2020.
- The regulatory revisions covering minimum deposit rate introduced in the earlier years of this six years analysis has adversely affected the Bank's net interest margins. The said impact was strategically diluted by improving the CASA base during the period; taking it to over 92.96% as at December 31, 2020

### Non-Markup Income

- During the last six years, fee & commission income and capital gains have been the major drivers behind non-fund income growth. Apart from the exception of current year wherein the realization of various systematic and idiosyncratic factors emanating from the COVID-19 outbreak impacted Banks income streams, the fee & commission income has witnessed a broad based growth over the years on the back of new products and services added to the menu coupled with remote banking and branchless initiatives taken by the Bank. The product development teams of the Bank have been tapping the unbanked segment of the population and offering them tailored products to meet their specific financial requirements. Different types of products have been offered in order to meet the needs of the time like credit card, mobile banking, visa debit card, MCB Lite, prepaid cards, IBFT etc.
- The fee, commission and brokerage block of the Bank have been constant contributors to its bottom line growth; major thrust to the income has been provided by commission earned on card business, bancassurance business, remittances and intercity / intra-city cash transfers.
- The equity book of the Bank consists of investments in diverse companies with strong fundamentals and has been a stable contributor to the non-markup income by providing outstanding dividend yields.

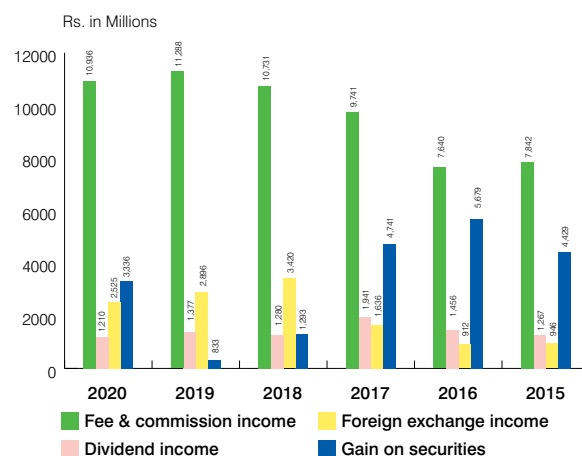

### Provisions and write offs

- The Bank's risk management platform is being driven by an augmented framework of sound risk principles, optimum organizational structure, robust risk assessment models and effective monitoring systems in an IT enabled environment to effectively identify, evaluate and mitigate all risks undertaken in the achievement of its long-term strategic objectives. The captioned platform has formed the basis for a declining trend in provision charge booked against advances over the years; in fact, the Bank's has been able to post significant provision reversals up till year 2019 on the back of extensive recovery efforts undertaken.

During 2020, however, the Bank has witnessed a trend reversal in recognition of provision against advances. The subjective classification of obligor accounts on a prudent basis coupled with an additional recognition of a general provision charge, amounting to Rs. 4 billion, in anticipation of the impact realization of COVID-19 pandemic post expiration of SBP's relaxations and waivers in 2021 have been the prime contributors to the captioned increase. The Bank has not taken any benefit of FSV in its provision calculation.

The provision recognized against equity portfolio over the last 3 years amidst ensuing market volatility also witnessed a trend reversal in 2020 as the KSE index gained momentum on the back of improving market sentiment.

### Operating expense:

- Considering expansion in Bank's branch outreach, continued investment in technological infrastructure, regular performance merit adjustments for the Human Capital, rising regulatory compliance costs and sustained inflationary patterns witnessed over the period of six years, the posted growth in the administrative block of the Bank has been nominal. Automation led saving initiatives, centralization of operations and imposition of annual capping's have been the key pillars of the cost management drive undertaken by the Bank; additionally laying the basis for the Bank to boast one of the lowest cost to income ratios in the industry.

### Profit before tax and Profit after tax:

- MCB Bank has been able to post outstanding profitability numbers over the period of last six years as substantiated by one of the highest industry EPS and a remarkable return on assets ratio.
- The aggregate profit after tax for the last six years has crossed Rs. 144 billion.
- Profitability ratios have been one of the best in the banking industry which are reflective of the effective management of the affairs and adoption of prudent strategies.

### Other statistics

- The Bank has added almost 2 million bank accounts to its base during the past 6 years with the current statistics highlighting the bank accounts to be over 8 million.
- With active participation in trade, MCB Bank has been able to improve trade volume in last 6 years which has increased to Rs. 577 billion for imports and Rs. 332 billion for exports.
- The Bank has been able to increase its market share in the remittance business growing from Rs. 214 billion as at December 31, 2015 to the volume of Rs. 519 billion as at December 31, 2020.
- In 2008, the Bank launched Bancassurance which was a unique cross functional service to the customers of the Bank. With only 131 policies and 129 customers in 2008, MCB Bank issues 35,791 new policies with premium amount of more than Rs. 2.59 billion in FY 2020.
- MCB Bank launched mobile banking in 2009 with approximately 53K customers reported by the end of the 2009. As of 2020, the mobile customers have grown to 1.39 million and above with transaction volume of over Rs. 78 billion.
- In 2015, MCB Annual Report had been honored to receive 1st place by South Asian Federation of Accountant (SAFA) for best presented Annual Accounts 2014. MCB was the 1st Pakistani bank to receive this accolade. In the past years, we have been awarded merit certificate and runner up awards for the same.
- In 2016, the Bank was awarded Best Bank in the "Corporate Finance and Investment Banking" by EuroMoney Awards. We have also been awarded Best Bank in the FinanceAsia Country Awards during the recent past years.
- China-Pakistan Economic Corridor ('CPEC') is beginning to show greater momentum with several energy and infrastructure projects in the pipeline, which will fuel growth in the medium term. Bank is continuously focusing on CPEC related infrastructure projects and bank has been able to achieve various awards on outstanding performance under CPEC arrangements. In this regard bank received award for Best Regional Bank in South Asia for BRI (Belt & Road Initiative) - Asiamoney New Silk Road Finance Awards 2017.
- In 2019, the Bank was declared as the "Most Outstanding Company in Pakistan" in the financial sector category by Asiamoney.
- During the year 2020, MCB's Annual Report was adjudged winner of the "Best Corporate Report" award in the financial sector category for the 8th consecutive year. MCB Bank has been awarded as winner by ICAP and ICMAP for the captioned award 10 times in the past 11 years.

# Six Years' - Graphical Summary of Ratios 2015 - 2020

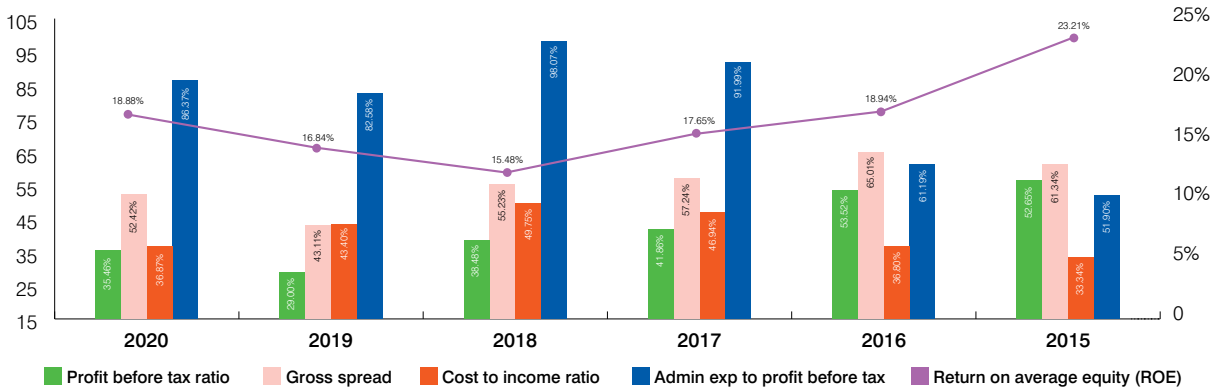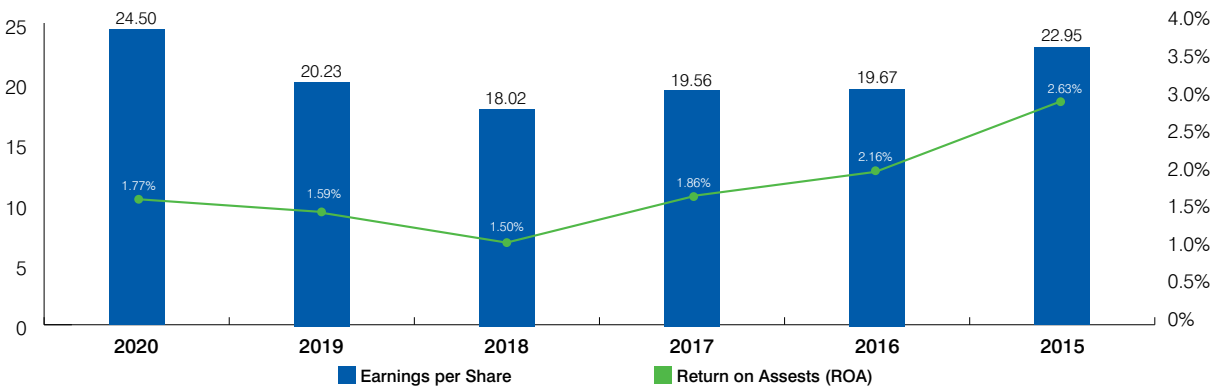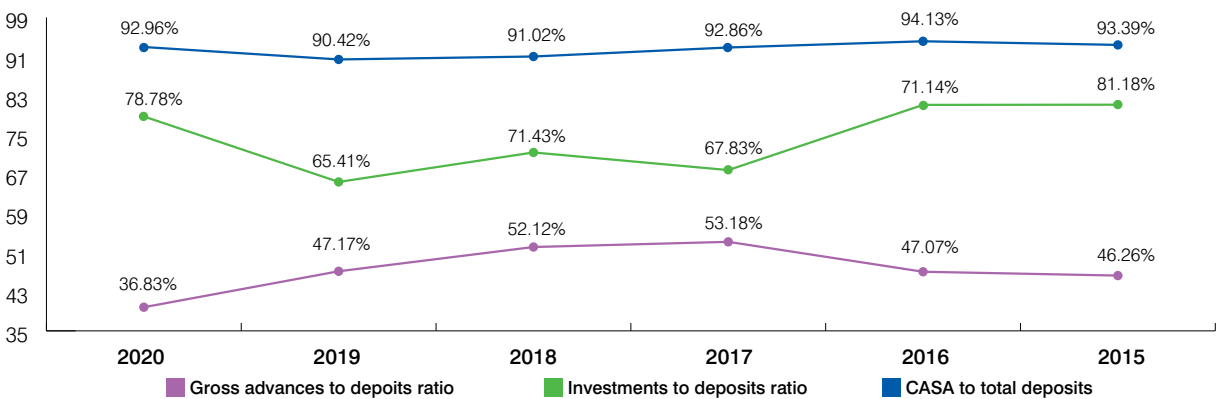

# Six Years' - Concentration of Advances, NPLs and Off Balance Sheet Items 2015 - 2020

### Gross Advances

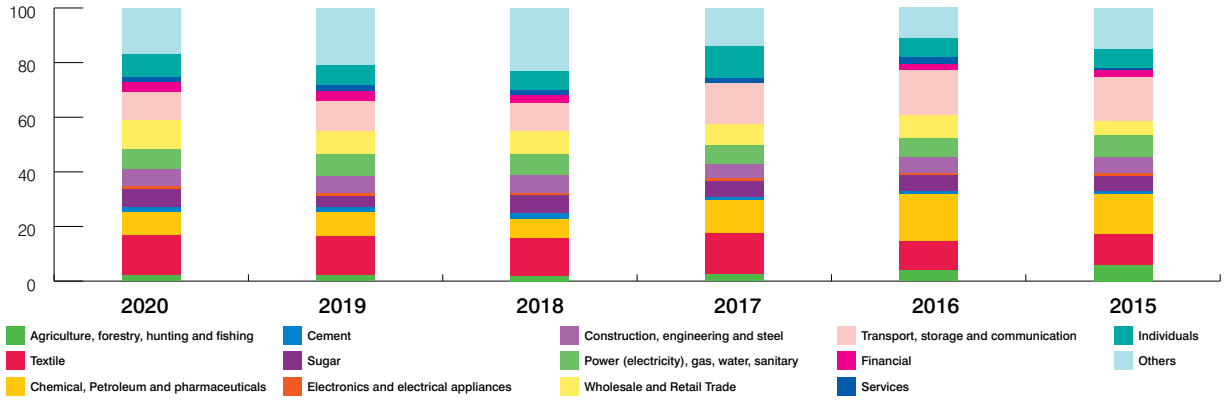

### Classified Advances

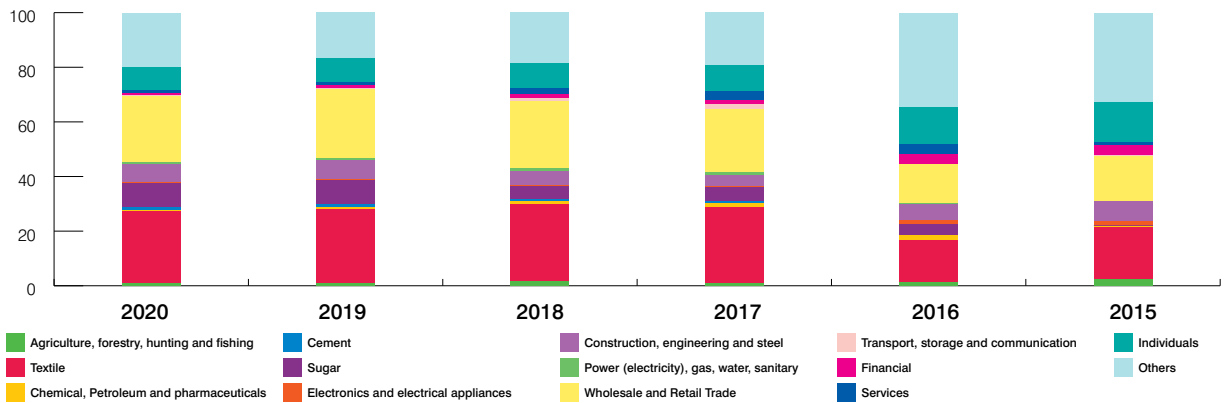

### Off Balance Sheet Item

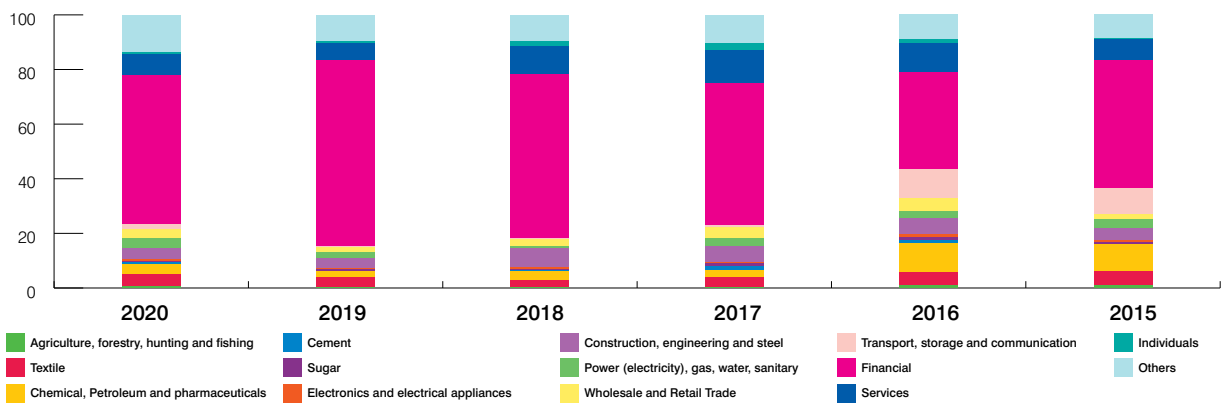

# Six Years' - Maturities of Assets & Liabilities 2015 - 2020

### Maturities of Assets

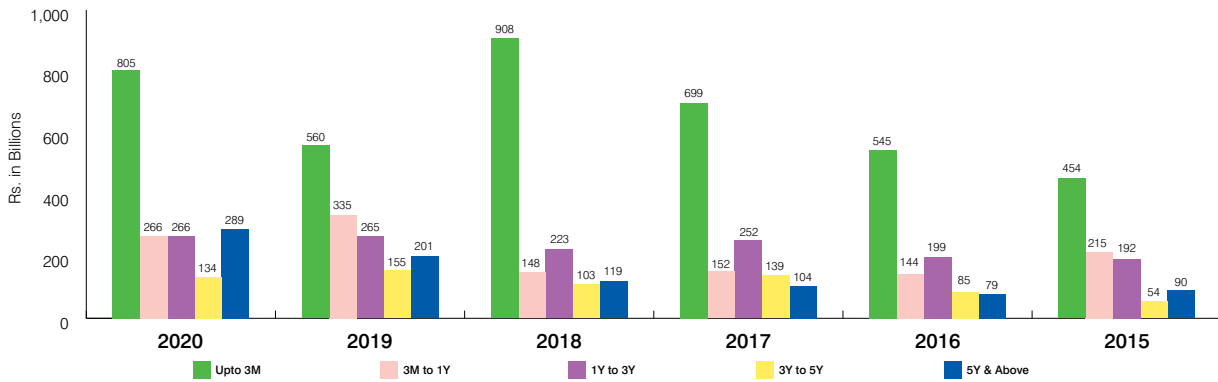

### Maturities of Liabilities

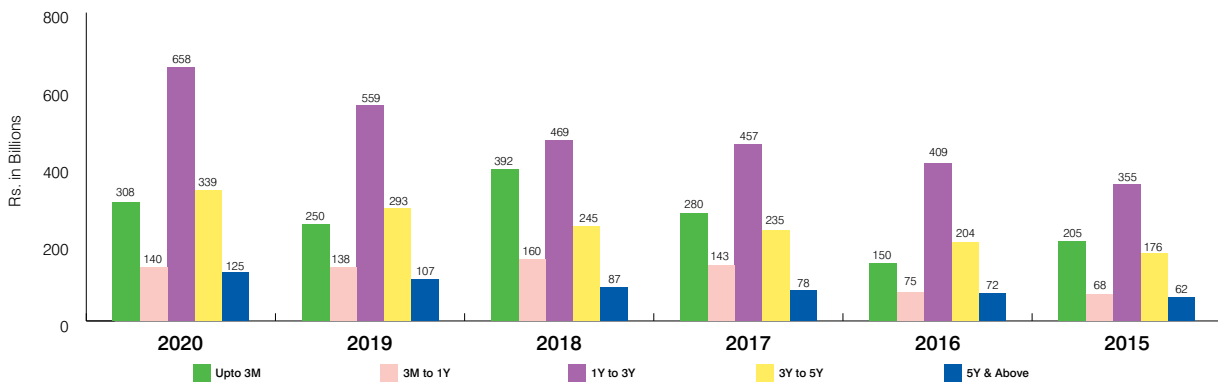

\* Based on expected maturities

## DuPont Analysis

|                      |                                 |           | 2020   | 2019   | 2018   | 2017   | 2016   | 2015   |
|----------------------|---------------------------------|-----------|--------|--------|--------|--------|--------|--------|
| Net Operating Margin | PAT / Total Income              | A         | 32.45% | 31.43% | 33.79% | 36.95% | 36.49% | 38.78% |
| Asset Utilization    | Total Income / Average Assets   | B         | 5.47%  | 5.06%  | 4.45%  | 5.03%  | 5.78%  | 6.80%  |
| Return on Assets     |                                 | C = A x B | 1.77%  | 1.59%  | 1.50%  | 1.86%  | 2.11%  | 2.63%  |
| Equity Multiplier    | Average Assets / Average Equity | D         | 10.64  | 10.58  | 10.29  | 9.49   | 8.99   | 8.81   |
| Return on Equity     |                                 | C X D     | 18.88% | 16.84% | 15.48% | 17.65% | 18.94% | 23.21% |

Following are the main DuPont analysis highlights:

- 1) Net operating margin has dropped during 2015-2019, with a increase in 2020.
- 2) Asset utilization has dropped during 2015-2018, and improved in 2019 & 2020.
- 3) Equity Multiplier showing increasing trend since 2015.

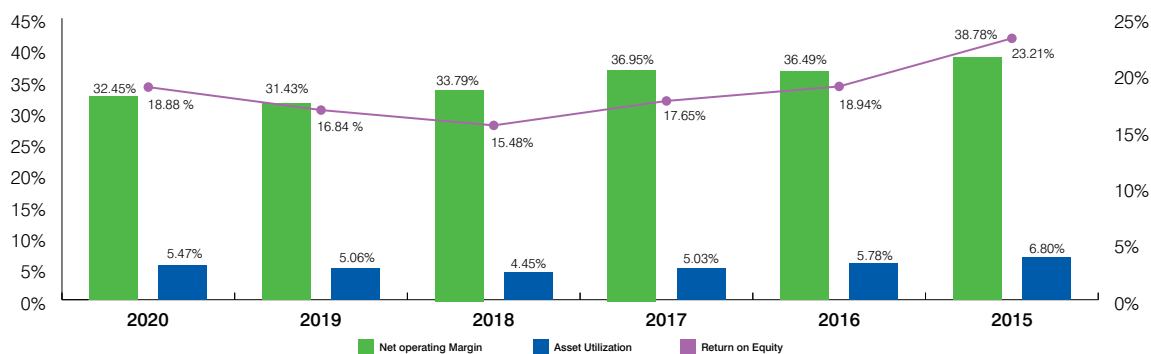

## Summary of Cash Flows

|                                                  | Rupees in million |          |           |          |          |          |
|--------------------------------------------------|-------------------|----------|-----------|----------|----------|----------|
|                                                  | 2020              | 2019     | 2018      | 2017     | 2016     | 2015     |
| Cash flows from operating activities             | 285,808           | 48,192   | 143,221   | 121,010  | 21,593   | 82,440   |
| Cash flows from / (used in) investing activities | (270,459)         | 6,681    | (118,767) | (72,671) | 11,043   | (50,942) |
| *Cash flows used in financing activities         | (13,433)          | (20,603) | (18,794)  | (22,777) | (17,912) | (17,243) |
| Cash & cash equivalents at beginning of the year | 143,898           | 109,628  | 103,968   | 78,406   | 63,682   | 49,427   |
| Cash & cash equivalents at end of the year       | 145,814           | 143,898  | 109,628   | 103,968  | 78,406   | 63,682   |

### Commentary - Cash Flow Statement

Operating cash flows depict cash inflows generated from core activities of the Bank i.e. Deposit generation. The operating cash flows increased from Rs. 48.2 billion in 2019 to Rs. 285.8 billion in 2020 as greater contribution from deposits and borrowings from financial institutions added Rs. 144.7 billion and Rs. 75.4 billion to the inflows respectively.

Despite a restrained operating environment in 2020 amidst the COVID-19 outbreak, the Bank's strategic focus on improving deposit mobilization and optimizing its cost mix culminated into a significant growth of 12.6% in its deposits base; CASA was reported at 93%. A moderating economic activity coupled with limited credit extension avenues within the Bank's defined risk appetite meant that excess liquidity was diverted towards Bank's investment book; the investing cash flows hence reporting a massive outflow of Rs. 270.5 billion during the year.

Cash outflow from financing activities primarily reflect payments on account of dividends to the shareholders. During the year 2020, financing cash flows declined to Rs. 13.4 billion against an average outflow of Rs. 19.3 billion posted in the preceding 5 years as the State Bank of Pakistan (SBP) directed banks to suspend dividend distribution for two quarters of 2020 as a precautionary measure to conserve capital and enhance the liquidity and stress absorption capacity of the banks amidst the ongoing COVID-19 outbreak.

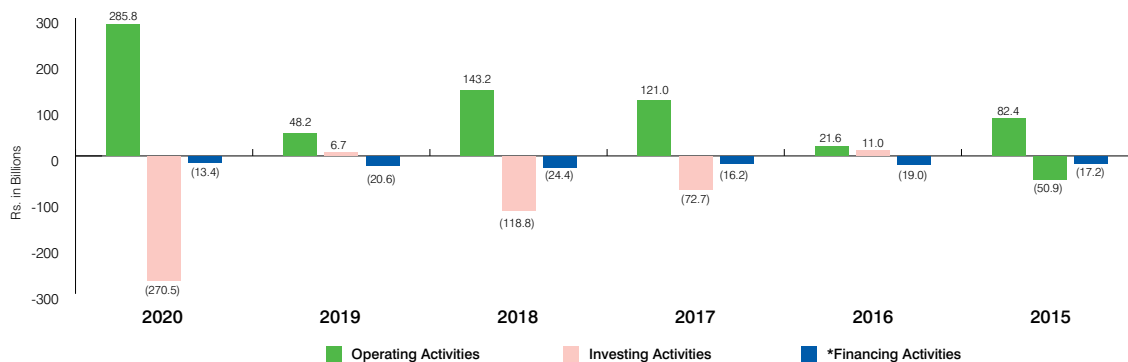

\*Net Cash from financing activities include effects of exchange rate changes

## Free Cash Flows

|                                              | Rupees in million |         |         |         |          |        |
|----------------------------------------------|-------------------|---------|---------|---------|----------|--------|
|                                              | 2020              | 2019    | 2018    | 2017    | 2016     | 2015   |
| Profit before taxation                       | 48,249            | 40,102  | 32,064  | 31,014  | 36,075   | 42,329 |
| Adjustment for non-cash items                | 11,687            | 6,174   | 264     | 882     | 1,525    | 1,419  |
| Operating assets/ liabilities changes        | 225,872           | 1,916   | 110,893 | 89,114  | (16,007) | 38,692 |
| Net cash generated from operating activities | 285,808           | 48,192  | 143,221 | 121,010 | 21,593   | 82,440 |
| Capital expenditure                          | (3,090)           | (5,022) | (4,483) | (4,745) | (3,485)  | (942)  |
| Free cash flows                              | 288,898           | 43,170  | 138,738 | 116,265 | 18,108   | 81,498 |



# Cash Flow Statement

## Direct Method

|                                                                               | 2020                | 2019            |
|-------------------------------------------------------------------------------|---------------------|-----------------|
|                                                                               | (Rupees in Million) |                 |
| <b>Cash flows from operating activities</b>                                   |                     |                 |
| Mark-up / return / interest and commission receipts                           | 159,662             | 140,715         |
| Mark-up / return / interest payments                                          | (84,595)            | (67,306)        |
| Payments to employees, suppliers and others                                   | (29,162)            | (29,592)        |
|                                                                               | <b>45,905</b>       | <b>43,817</b>   |
| <b>Decrease / (increase) in operating assets</b>                              |                     |                 |
| Lendings to financial institutions                                            | (16,049)            | 34,016          |
| Net investments in 'held for trading' securities                              | 8,180               | (129)           |
| Advances - net                                                                | 26,262              | 7,225           |
| Other assets                                                                  | 2,977               | (3,554)         |
|                                                                               | <b>21,370</b>       | <b>37,558</b>   |
| <b>(Decrease) / increase in operating liabilities</b>                         |                     |                 |
| Bills payable                                                                 | 12,159              | (3,878)         |
| Borrowings                                                                    | 75,448              | (125,990)       |
| Deposits and other accounts                                                   | 144,739             | 95,726          |
| Other liabilities                                                             | 2,265               | 3,266           |
|                                                                               | <b>234,611</b>      | <b>(30,876)</b> |
|                                                                               | <b>301,886</b>      | <b>50,499</b>   |
| Income tax paid                                                               | (16,078)            | (2,307)         |
| <b>Net cash flows from operating activities</b>                               | <b>285,808</b>      | <b>48,192</b>   |
| <b>Cash flows from investing activities</b>                                   |                     |                 |
| Net investments in 'available for sale' securities                            | (286,438)           | 8,628           |
| Net investments in 'held to maturity' securities                              | 17,363              | 310             |
| Investment in a subsidiary company                                            | -                   | (350)           |
| Dividends received                                                            | 1,180               | 1,395           |
| Investments in operating fixed assets                                         | (2,791)             | (4,396)         |
| Investments in intangible assets                                              | (299)               | (626)           |
| Sale proceeds of operating fixed assets and intangible assets disposed off    | 187                 | 158             |
| Proceeds from sale of non-banking assets acquired in satisfaction of claims   | 39                  | 540             |
| Investments in non-banking assets acquired in satisfaction of claims          | -                   | (64)            |
| Net cash inflow from amalgamation of a subsidiary                             | -                   | 41              |
| Proceeds from divestment in a subsidiary                                      | 100                 | -               |
| Exchange differences on translation of the net investment in foreign branches | 201                 | 1,046           |
| <b>Net cash flows from / (used in) investing activities</b>                   | <b>(270,458)</b>    | <b>6,682</b>    |
| <b>Cash flows from financing activities</b>                                   |                     |                 |
| Payments of Subordinated debt                                                 | -                   | (3,891)         |
| Dividend paid                                                                 | (11,751)            | (18,838)        |
| Payment of lease liability against right-of-use-assets                        | (1,683)             | (1,428)         |
| <b>Net cash flows used in financing activities</b>                            | <b>(13,434)</b>     | <b>(24,157)</b> |
| Effects of exchange rate changes on cash and cash equivalents                 | 1,595               | 3,553           |
| <b>Increase in cash and cash equivalents</b>                                  | <b>3,511</b>        | <b>34,270</b>   |
| Cash and cash equivalents at beginning of the year                            | 142,303             | 109,628         |
| <b>Cash and cash equivalents at end of the year</b>                           | <b>145,814</b>      | <b>143,898</b>  |

Cash flow statement in annual financial statement is required to be prepared in line with the format prescribed by State Bank of Pakistan under BPRD Circular No .2 dated 25, 2018, 'Revised Forms of Annual Financial statements.

## Markup & Non Markup Income

|                                                         | 2020    | 2019    | 2018   | 2017   | Rupees in Million |        |
|---------------------------------------------------------|---------|---------|--------|--------|-------------------|--------|
|                                                         |         |         |        |        | 2016              | 2015   |
| <b>Markup Income</b>                                    |         |         |        |        |                   |        |
| Loans and advances                                      | 42,879  | 57,330  | 36,964 | 26,931 | 22,956            | 26,128 |
| Investments                                             | 91,983  | 75,481  | 44,719 | 46,876 | 44,226            | 54,010 |
| Lendings to Financial Institutions                      | 998     | 4,982   | 1,390  | 174    | 122               | 176    |
| Balance with banks                                      | 215     | 499     | 246    | 111    | 97                | 79     |
|                                                         | 136,076 | 138,292 | 83,319 | 74,091 | 67,400            | 80,393 |
| <b>Markup Expense</b>                                   |         |         |        |        |                   |        |
| Deposits                                                | 55,095  | 65,344  | 32,081 | 22,105 | 18,313            | 23,326 |
| Borrowings                                              | 6,152   | 8,977   | 4,253  | 8,837  | 4,556             | 7,185  |
| Subordinated loan                                       | –       | 214     | 308    | 138    | –                 | –      |
| Unwinding cost of liability against right-of-use assets | 2,387   | 1,132   | –      | –      | –                 | –      |
| Others                                                  | 1,107   | 3,009   | 663    | 349    | 717               | 566    |
|                                                         | 64,741  | 78,676  | 37,305 | 31,429 | 23,586            | 31,077 |
| <b>Net Markup Income</b>                                |         |         |        |        |                   |        |
|                                                         | 71,334  | 59,616  | 46,014 | 42,662 | 43,814            | 49,316 |
| <b>Non Markup Income</b>                                |         |         |        |        |                   |        |
| Fee & commission Income                                 | 10,936  | 11,288  | 10,731 | 9,741  | 7,640             | 7,842  |
| Dividend Income                                         | 1,210   | 1,377   | 1,280  | 1,941  | 1,456             | 1,267  |
| Foreign exchange income                                 | 2,525   | 2,895   | 3,420  | 1,636  | 912               | 946    |
| Gain on securities                                      | 3,336   | 833     | 1,293  | 4,741  | 5,679             | 4,429  |
| Other Income                                            | 128     | 286     | 474    | 58     | 488               | 2,083  |
|                                                         | 18,136  | 16,679  | 17,198 | 18,118 | 16,175            | 16,566 |

**Markup Income from Advances and Investments (2015-2020)**

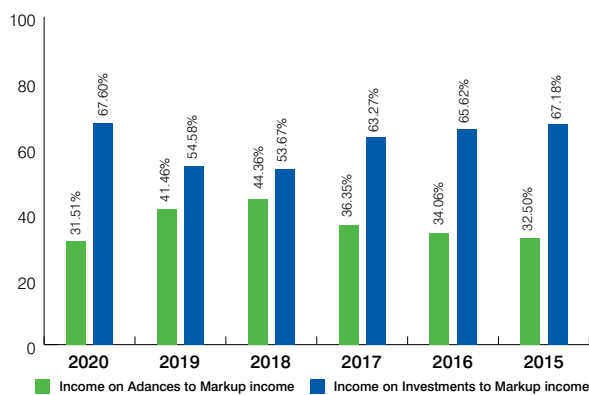

**Income Composition (2015-2020)**

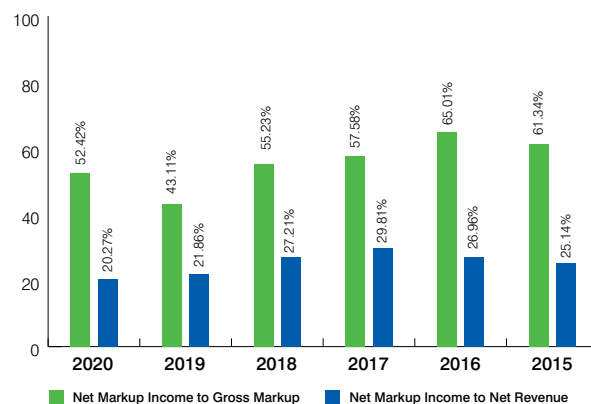

## Operating Expenses

|                                                     | 2020   | 2019   | 2018   | 2017   | Rupees in Million |        |
|-----------------------------------------------------|--------|--------|--------|--------|-------------------|--------|
|                                                     |        |        |        |        | 2016              | 2015   |
| <b>Total compensation expense</b>                   | 15,806 | 14,585 | 14,053 | 12,301 | 9,111             | 8,962  |
| <b>Property expense</b>                             |        |        |        |        |                   |        |
| Rent & taxes                                        | 161    | 227    | 1,959  | 1,526  | 1,047             | 1,044  |
| Insurance                                           | 23     | 21     | 26     | 27     | 24                | 25     |
| Utilities cost                                      | 1,218  | 1,203  | 1,095  | 911    | 739               | 745    |
| Fuel Expense                                        | 335    | 534    | 514    | 459    | 368               | 545    |
| Security (including guards)                         | 1,240  | 1,382  | 1,603  | 1,392  | 1,178             | 1,034  |
| Repair & maintenance (including janitorial charges) | 653    | 812    | 945    | 790    | 660               | 516    |
| Depreciation on right-of-use assets                 | 1,217  | 1,162  | -      | -      | -                 | -      |
| Depreciation                                        | 642    | 504    | 458    | 383    | 385               | 390    |
|                                                     | 5,488  | 5,845  | 6,599  | 5,487  | 4,400             | 4,300  |
| <b>Information technology expenses</b>              |        |        |        |        |                   |        |
| Software maintenance                                | 1,148  | 1,188  | 1,151  | 863    | 763               | 732    |
| Hardware maintenance                                | 212    | 299    | 364    | 349    | 239               | 239    |
| Depreciation                                        | 548    | 616    | 721    | 690    | 644               | 706    |
| Amortization                                        | 318    | 301    | 256    | 244    | 366               | 364    |
| Network charges                                     | 598    | 601    | 616    | 621    | 554               | 631    |
| Insurance                                           | 4      | 3      | 4      | 5      | 6                 | 5      |
|                                                     | 2,829  | 3,009  | 3,112  | 2,772  | 2,572             | 2,677  |
| <b>Other operating expenses</b>                     |        |        |        |        |                   |        |
| Directors' fees and allowances                      | 50     | 57     | 41     | 39     | 35                | 35     |
| Legal & professional charges                        | 268    | 350    | 302    | 328    | 265               | 212    |
| Outsourced services costs                           | 692    | 690    | 1,119  | 1,167  | 818               | 830    |
| Travelling & conveyance                             | 261    | 321    | 343    | 293    | 396               | 236    |
| NIFT clearing charges                               | 166    | 152    | 146    | 136    | 126               | 138    |
| Depreciation                                        | 816    | 797    | 802    | 656    | 544               | 475    |
| Depreciation on non-banking assets                  | 30     | 45     | 49     | 30     | 29                | -      |
| Training & development                              | 37     | 57     | 51     | 60     | 51                | 45     |
| Postage & courier charges                           | 234    | 303    | 271    | 323    | 247               | 267    |
| Communication                                       | 326    | 373    | 317    | 384    | 306               | 308    |
| Stationery & printing                               | 563    | 639    | 704    | 646    | 543               | 609    |
| Marketing, advertisement & publicity                | 695    | 625    | 518    | 531    | 483               | 362    |
| Donations                                           | 113    | 0      | 1      | 12     | 13                | -      |
| Auditors Remuneration                               | 30     | 30     | 34     | 41     | 24                | 39     |
| Cash transportation charges                         | 709    | 799    | 744    | 631    | 551               | 545    |
| Repair & maintenance                                | 402    | 416    | 460    | 513    | 403               | 331    |
| Subscription                                        | 21     | 20     | 24     | 18     | 27                | 16     |
| Entertainment                                       | 184    | 232    | 233    | 235    | 186               | 174    |
| Credit Card Related Expenses                        | 829    | 1,182  | 738    | 562    | 415               | 348    |
| CNIC verification charges                           | 129    | 207    | 138    | 107    | 76                | 62     |
| Insurance                                           | 1,483  | 1,441  | 821    | 254    | 236               | 294    |
| Others                                              | 486    | 493    | 473    | 431    | 215               | 286    |
|                                                     | 8,523  | 9,232  | 8,327  | 7,397  | 5,991             | 5,611  |
| <b>Operating excluding compensation</b>             | 16,840 | 18,086 | 18,038 | 15,657 | 12,963            | 12,589 |
| <b>Total operating expenses</b>                     | 32,646 | 32,671 | 32,091 | 27,958 | 22,074            | 21,551 |

### Cost to income ratio

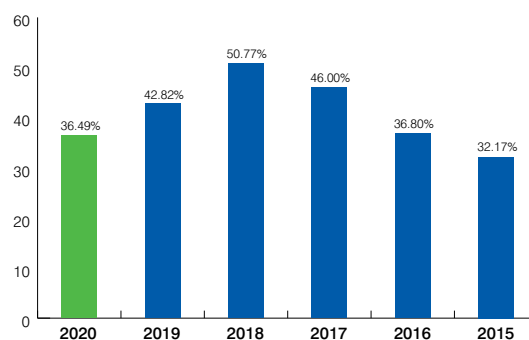

## Economic Value Added Statement

|                                           | 2020                 | 2019    |
|-------------------------------------------|----------------------|---------|
|                                           | ( Rupees in Million) |         |
| <b>Invested Capital</b>                   |                      |         |
| Average shareholders' equity              | 153,800              | 142,375 |
| Add: Cumulative provisions against assets | 63,844               | 56,652  |
|                                           | 217,644              | 199,027 |
| <b>Return on Invested Capital</b>         |                      |         |
| Profit after taxation                     | 29,037               | 23,977  |
| Add: Provisions and write offs - net      | 7,313                | 2,484   |
| Total return on invested capital          | 36,350               | 26,460  |
| Economic cost                             | 11.37%               | 12.89%  |
| Opportunity cost of invested capital      | 24,746               | 25,655  |
| Economic Value Added                      | 11,604               | 806     |

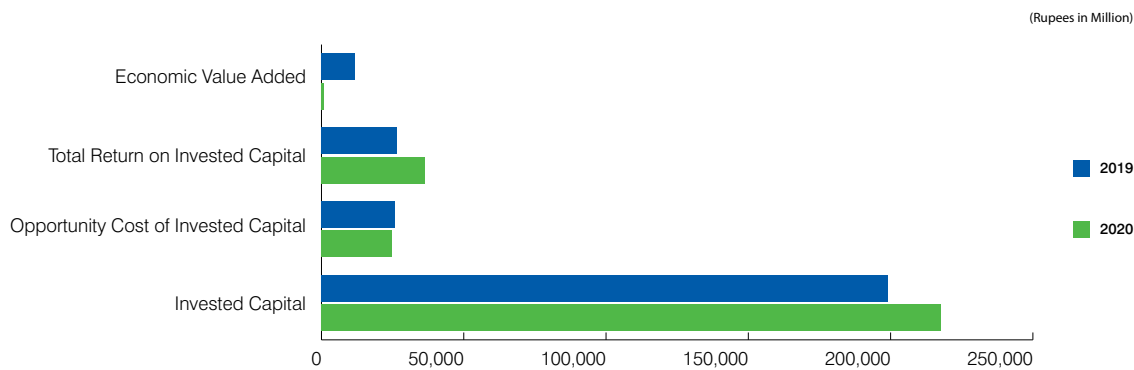

### Comments:

Increase in EVA as compared to last year is due to increase in profitability and decrease in economic cost due to revision in policy rates during the year.

## Capital expenditures

### Capital expenditure during the year:

The total capital expenditure during 2020 was Rs. 3.09 billion for business expansion, renovation and improvement of IT infrastructure.

### Capital expenditures planned for next year:

The Bank has budgeted capital expenditure of Rs. 6.9 billion for the next year. This would primarily be invested in increasing our operational outreach, continuous improvement in our Information Technology platforms, safeguarding our existing infrastructure / relationships from growing threats on cyber security front along with normal replacements to ensure smooth operations.

# Six Years' Vertical Analysis

## Statement of Financial Position/Profit & Loss

|                                               | 2020      |      | 2019      |      | 2018      |      | 2017      |      | 2016      |      | 2015      |      |
|-----------------------------------------------|-----------|------|-----------|------|-----------|------|-----------|------|-----------|------|-----------|------|
|                                               | Rs. Mln   | %    | Rs. Mln   | %    | Rs. Mln   | %    | Rs. Mln   | %    | Rs. Mln   | %    | Rs. Mln   | %    |
| <b>Statement of Financial Position</b>        |           |      |           |      |           |      |           |      |           |      |           |      |
| <b>Assets</b>                                 |           |      |           |      |           |      |           |      |           |      |           |      |
| Cash and balances with treasury banks         | 122,181   | 7%   | 132,705   | 9%   | 103,175   | 7%   | 106,072   | 8%   | 74,222    | 7%   | 60,568    | 6%   |
| Balances with other banks                     | 24,030    | 1%   | 12,542    | 1%   | 11,879    | 1%   | 4,579     | 0%   | 4,344     | 0%   | 3,611     | 0%   |
| Lendings to financial institutions            | 17,139    | 1%   | 1,090     | 0%   | 35,106    | 2%   | 4,398     | 0%   | 2,810     | 0%   | 3,080     | 0%   |
| Investments                                   | 1,015,869 | 58%  | 748,765   | 49%  | 749,369   | 50%  | 656,964   | 49%  | 555,929   | 52%  | 565,696   | 56%  |
| Advances                                      | 462,942   | 26%  | 496,679   | 33%  | 503,581   | 34%  | 469,356   | 35%  | 348,117   | 32%  | 304,122   | 30%  |
| Fixed assets                                  | 58,028    | 3%   | 58,271    | 4%   | 40,812    | 3%   | 39,170    | 3%   | 32,409    | 3%   | 29,227    | 3%   |
| Intangible assets                             | 938       | 0%   | 958       | 0%   | 630       | 0%   | 404       | 0%   | 343       | 0%   | 723       | 0%   |
| Other assets                                  | 56,334    | 3%   | 64,143    | 4%   | 53,578    | 4%   | 62,295    | 5%   | 54,191    | 5%   | 37,384    | 4%   |
|                                               | 1,757,462 | 100% | 1,515,152 | 100% | 1,498,130 | 100% | 1,343,238 | 100% | 1,072,365 | 100% | 1,004,410 | 100% |
| <b>Liabilities</b>                            |           |      |           |      |           |      |           |      |           |      |           |      |
| Bills payable                                 | 23,981    | 1%   | 11,822    | 1%   | 15,699    | 1%   | 22,681    | 2%   | 12,844    | 1%   | 11,889    | 1%   |
| Borrowings                                    | 164,002   | 9%   | 89,506    | 6%   | 216,019   | 14%  | 133,070   | 10%  | 74,515    | 7%   | 118,040   | 12%  |
| Deposits                                      | 1,289,502 | 73%  | 1,144,763 | 76%  | 1,049,038 | 70%  | 968,483   | 72%  | 781,430   | 73%  | 696,805   | 69%  |
| Sub-ordinated loan                            | -         | -    | -         | -    | 3,891     | 0%   | 3,893     | 0%   | -         | -    | -         | -    |
| Deferred tax liabilities                      | 6,975     | 0%   | 5,851     | 0%   | 1,532     | 0%   | 4,625     | 0%   | 11,260    | 1%   | 11,377    | 1%   |
| Other liabilities                             | 82,901    | 5%   | 94,296    | 6%   | 62,673    | 4%   | 56,921    | 4%   | 50,690    | 5%   | 28,498    | 3%   |
|                                               | 1,567,361 | 89%  | 1,346,237 | 89%  | 1,348,852 | 90%  | 1,189,672 | 89%  | 930,739   | 87%  | 866,608   | 86%  |
| <b>Net Assets</b>                             |           |      |           |      |           |      |           |      |           |      |           |      |
|                                               | 190,102   | 11%  | 168,915   | 11%  | 149,278   | 10%  | 153,566   | 11%  | 141,627   | 13%  | 137,802   | 14%  |
| <b>Represented by</b>                         |           |      |           |      |           |      |           |      |           |      |           |      |
| Share capital                                 | 11,851    | 1%   | 11,851    | 1%   | 11,851    | 1%   | 11,851    | 1%   | 11,130    | 1%   | 11,130    | 1%   |
| Reserves                                      | 80,696    | 5%   | 77,591    | 5%   | 74,148    | 5%   | 70,866    | 5%   | 53,347    | 5%   | 51,309    | 5%   |
| Surplus on revaluation of assets - net of tax | 27,720    | 2%   | 23,695    | 2%   | 9,747     | 1%   | 17,073    | 1%   | 23,680    | 2%   | 24,616    | 2%   |
| Unappropriated profit                         | 69,835    | 4%   | 55,777    | 4%   | 53,532    | 4%   | 53,776    | 4%   | 53,469    | 5%   | 50,747    | 5%   |
|                                               | 190,102   | 11%  | 168,915   | 11%  | 149,278   | 10%  | 153,566   | 11%  | 141,627   | 13%  | 137,802   | 14%  |
| <b>Profit &amp; Loss Account</b>              |           |      |           |      |           |      |           |      |           |      |           |      |
| Mark-up earned                                | 136,076   | 88%  | 138,292   | 89%  | 83,319    | 83%  | 74,091    | 80%  | 67,400    | 81%  | 80,393    | 83%  |
| Mark-up expensed                              | (64,741)  | -42% | (78,676)  | -51% | (37,305)  | -37% | (31,429)  | -34% | (23,586)  | -28% | (31,077)  | -32% |
| Net mark-up income                            | 71,334    | 46%  | 59,616    | 38%  | 46,014    | 46%  | 42,662    | 46%  | 43,814    | 52%  | 49,316    | 51%  |
| Non-mark-up income                            | 18,136    | 12%  | 16,679    | 11%  | 17,198    | 17%  | 18,118    | 20%  | 16,175    | 19%  | 16,566    | 17%  |
| Total income                                  | 89,470    | 58%  | 76,295    | 49%  | 63,212    | 63%  | 60,780    | 66%  | 59,989    | 72%  | 65,882    | 68%  |
| Non-mark-up expenses                          | (33,908)  | -22% | (33,709)  | -22% | (32,902)  | -33% | (28,721)  | -31% | (22,989)  | -28% | (22,895)  | -24% |
| Profit before provisions                      | 55,562    | 36%  | 42,586    | 27%  | 30,310    | 30%  | 32,059    | 35%  | 36,999    | 44%  | 42,987    | 44%  |
| Provisions & write off                        | (7,313)   | -5%  | (2,484)   | -2%  | 1,753     | 2%   | (1,045)   | -1%  | (925)     | -1%  | (659)     | -1%  |
| Profit before taxation                        | 48,249    | 31%  | 40,102    | 26%  | 32,064    | 32%  | 31,014    | 34%  | 36,075    | 43%  | 42,329    | 44%  |
| Taxation                                      | (19,212)  | -12% | (16,125)  | -10% | (10,704)  | -11% | (8,555)   | -9%  | (14,184)  | -17% | (16,782)  | -17% |
| Profit after taxation                         | 29,037    | 19%  | 23,977    | 15%  | 21,360    | 21%  | 22,459    | 24%  | 21,891    | 26%  | 25,546    | 26%  |

# Six Years' Horizontal Analysis

## Statement of Financial Position/ Profit & Loss

|                                               | 2020          | 20 Vs 19   | 2019          | 19 Vs 18   | 2018          | 18 Vs 17   | 2017          | 17 Vs 16  | 2016          | 16 Vs 15    | 2015          | 15 Vs 14  |
|-----------------------------------------------|---------------|------------|---------------|------------|---------------|------------|---------------|-----------|---------------|-------------|---------------|-----------|
|                                               | Rs. Mln       | %          | Rs. Mln       | %          | Rs. Mln       | %          | Rs. Mln       | %         | Rs. Mln       | %           | Rs. Mln       | %         |
| <b>Statement of Financial Position</b>        |               |            |               |            |               |            |               |           |               |             |               |           |
| <b>Assets</b>                                 |               |            |               |            |               |            |               |           |               |             |               |           |
| Cash and balances with treasury banks         | 122,181       | -8%        | 132,705       | 29%        | 103,175       | -3%        | 106,072       | 43%       | 74,222        | 23%         | 60,568        | 30%       |
| Balances with other banks                     | 24,030        | 92%        | 12,542        | 6%         | 11,879        | 159%       | 4,579         | 5%        | 4,344         | 20%         | 3,611         | 20%       |
| Lendings to financial institutions            | 17,139        | 1472%      | 1,090         | -97%       | 35,106        | 698%       | 4,398         | 57%       | 2,810         | -9%         | 3,080         | 117%      |
| Investments                                   | 1,015,869     | 36%        | 748,765       | 0%         | 749,369       | 14%        | 656,964       | 18%       | 555,929       | -2%         | 565,696       | 11%       |
| Advances                                      | 462,942       | -7%        | 496,679       | -1%        | 503,581       | 7%         | 469,356       | 35%       | 348,117       | 14%         | 304,122       | 0%        |
| Operating fixed assets                        | 58,028        | 0%         | 58,271        | 43%        | 40,812        | 4%         | 39,170        | 21%       | 32,409        | 11%         | 29,227        | -4%       |
| Intangible assets                             | 938           | -2%        | 958           | 52%        | 630           | 56%        | 404           | 18%       | 343           | -53%        | 723           | 4%        |
| Other assets                                  | 56,334        | -12%       | 64,143        | 20%        | 53,578        | -14%       | 62,295        | 15%       | 54,191        | 45%         | 37,384        | 0%        |
|                                               | 1,757,462     | 15.99%     | 1,515,152     | 1.14%      | 1,498,130     | 11.53%     | 1,343,238     | 25.26%    | 1,072,365     | 7%          | 1,004,410     | 7%        |
| <b>Liabilities</b>                            |               |            |               |            |               |            |               |           |               |             |               |           |
| Bills payable                                 | 23,981        | 103%       | 11,822        | -25%       | 15,699        | -31%       | 22,681        | 77%       | 12,844        | 8%          | 11,889        | -29%      |
| Borrowings                                    | 164,002       | 83%        | 89,506        | -59%       | 216,019       | 62%        | 133,070       | 79%       | 74,515        | -37%        | 118,040       | 98%       |
| Deposits                                      | 1,289,502     | 13%        | 1,144,763     | 9%         | 1,049,038     | 8%         | 968,483       | 24%       | 781,430       | 12%         | 696,805       | 1%        |
| Sub-ordinated loan                            | -             | -          | -             | -100%      | 3,891         | 0%         | 3,893         | 100%      | -             | -           | -             | -         |
| Deferred tax liabilities                      | 6,975         | 19%        | 5,851         | 282%       | 1,532         | -67%       | 4,625         | -59%      | 11,260        | -1%         | 11,377        | 9%        |
| Other liabilities                             | 82,901        | -12%       | 94,296        | 50%        | 62,673        | 10%        | 56,921        | 12%       | 50,690        | 78%         | 28,498        | -4%       |
|                                               | 1,567,361     | 16%        | 1,346,237     | 0%         | 1,348,852     | 13%        | 1,189,672     | 28%       | 930,739       | 7%          | 866,608       | 8%        |
| <b>Net Assets</b>                             |               |            |               |            |               |            |               |           |               |             |               |           |
|                                               | 190,102       | 13%        | 168,915       | 13%        | 149,278       | -3%        | 153,566       | 8%        | 141,627       | 3%          | 137,802       | 6%        |
| <b>Represented by</b>                         |               |            |               |            |               |            |               |           |               |             |               |           |
| Share capital                                 | 11,851        | 0%         | 11,851        | 0%         | 11,851        | 0%         | 11,851        | 6%        | 11,130        | 0%          | 11,130        | 0%        |
| Reserves                                      | 80,696        | 4%         | 77,591        | 5%         | 74,148        | 5%         | 70,866        | 33%       | 53,347        | 4%          | 51,309        | 5%        |
| Surplus on revaluation of assets - net of tax | 27,720        | 17%        | 23,695        | 143%       | 9,747         | -43%       | 17,073        | -28%      | 23,680        | -4%         | 24,616        | 6%        |
| Unappropriated profit                         | 69,835        | 25%        | 55,777        | 4%         | 53,532        | 0%         | 53,776        | 1%        | 53,469        | 5%          | 50,747        | 8%        |
|                                               | 190,102       | 13%        | 168,915       | 13%        | 149,278       | -3%        | 153,566       | 8%        | 141,627       | 3%          | 137,802       | 6%        |
| <b>Profit &amp; Loss Account</b>              |               |            |               |            |               |            |               |           |               |             |               |           |
| Mark-up earned                                | 136,076       | -2%        | 138,292       | 66%        | 83,319        | 12%        | 74,091        | 10%       | 67,400        | -16%        | 80,393        | 4%        |
| Mark-up expensed                              | (64,741)      | -18%       | (78,676)      | 111%       | (37,305)      | 19%        | (31,429)      | 33%       | (23,586)      | -24%        | (31,077)      | -8%       |
| Net mark-up income                            | 71,334        | 20%        | 59,616        | 30%        | 46,014        | 8%         | 42,662        | -3%       | 43,814        | -11%        | 49,316        | 13%       |
| Non-mark-up income                            | 18,136        | 9%         | 16,679        | -3%        | 17,198        | -5%        | 18,118        | 12%       | 16,175        | -2%         | 16,566        | 28%       |
| Total income                                  | 89,470        | 17%        | 76,295        | 21%        | 63,212        | 4%         | 60,780        | 1%        | 59,989        | -9%         | 65,882        | 17%       |
| Non-mark-up expenses                          | (33,908)      | 1%         | (33,709)      | 2%         | (32,902)      | 15%        | (28,721)      | 25%       | (22,989)      | 0%          | (22,895)      | 6%        |
| Profit before provisions                      | 55,562        | 30%        | 42,586        | 40%        | 30,310        | -5%        | 32,059        | -13%      | 36,999        | -14%        | 42,987        | 23%       |
| Provisions & write off                        | (7,313)       | 194%       | (2,484)       | -242%      | 1,753         | -268%      | (1,045)       | 13%       | (925)         | 40%         | (659)         | -135%     |
| Profit before taxation                        | 48,249        | 20%        | 40,102        | 25%        | 32,064        | 3%         | 31,014        | -14%      | 36,075        | -15%        | 42,329        | 15%       |
| Taxation                                      | (19,212)      | 19%        | (16,125)      | 51%        | (10,704)      | 25%        | (8,555)       | -40%      | (14,184)      | -15%        | (16,782)      | 35%       |
| <b>Profit after taxation</b>                  | <b>29,037</b> | <b>21%</b> | <b>23,977</b> | <b>12%</b> | <b>21,360</b> | <b>-5%</b> | <b>22,459</b> | <b>3%</b> | <b>21,891</b> | <b>-14%</b> | <b>25,546</b> | <b>5%</b> |

# Commentary on Six Years' Horizontal & Vertical Analysis

## Horizontal Analyses

The asset base of the Bank has increased considerably over the past 6 years and has crossed multiple milestones; including the landmark achievement of crossing Rs. 1.5 trillion in 2019. On an annualized basis, the asset base of the Bank has recorded an increase of 11.84% over the base year while the investments and gross advances have posted an increase of 12.42% and 9.75% respectively. Highest increase in the asset base has been observed in 2017 as the transfer of portfolio on account of merger of NIB Bank with and into MCB Bank Limited added to the asset base; the assets hence growing by 25% on a year on year (YoY) basis in 2017.

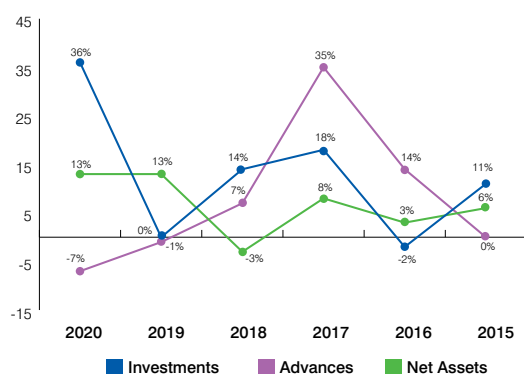

The deposit base of the Bank has increased considerably over the years; growing from Rs. 697 billion to Rs. 1,290 billion in 2020 and translating into a CAGR of 13.10% over the past 6 years. Highest increase has been reported in 2017, primarily on account of splendid volumetric growth coupled with deposits transferred under merger of NIB Bank into MCB Bank Limited. During the year 2018, MCB transferred business of its 90 branches to MCB wholly owned subsidiary i.e. MCB Islamic Bank Limited and deposits amounting to Rs. 21.9 billion were transferred under the de-merger scheme. Despite this transfer, the deposits grew by 8% in 2018 and have continued the upward trajectory in subsequent years; posting a healthy growth of 9% and 13% in 2019 and 2020 respectively.

Equity base of the bank has also posted a healthy increase due to higher profitability in the past 6 years; translating into a CAGR of 7.49% over the base year.

On the Profit and Loss side, gross markup earned has posted an average increase of 11.10% over a span of six years. This is due to the increase in mark up earned on investments and loan and advances in the last 6 years. The highest gross markup income over the span has been reported in 2019 as the double digit policy rate coupled with healthy volumetric gains in the earning assets base contributed to the significant rise. The increase in markup expense on deposits is on account of regulatory revisions in MDR enacted by the Central Bank and volumetric

increase achieved in the deposit base. The cost of deposit for the Bank has been strategically managed by maintaining the CASA base of the Bank. However, the total markup expense has increased by 15.81% over the six year period under coverage.

The non-markup income block of the Bank has remained a steady contributor to its bottom line growth. On the other hand, growth in non-markup expenses has been kept in check through realization of various initiatives implemented as part Bank's cost management drive; hence depicting a meager growth of 6.76% over the period under review despite continuous investment in Banks digital and physical infrastructure along with sustained inflationary pressures.

One of the key strengths of the Bank has been the recovery of its classified portfolio which is clearly reflected in the reduced / reverse credit charge booked over the last few years. However, in 2020, anticipating that customers affected by the pandemic might require provisioning once SBP's relaxations and waivers expire in 2021, the management has proactively booked a general provision charge of Rs. 4.0 billion. This coupled with the subjective provisioning of obligor accounts on a prudent basis has resulted in trend reversal for recognition of credit charge during the year; in turn further supplementing Bank's insulation and loss absorption capacity against rising risks to the asset quality.

MCB enjoys one of the highest spreads in the banking industry which are duly reflected in the profitability ratios of the Bank.

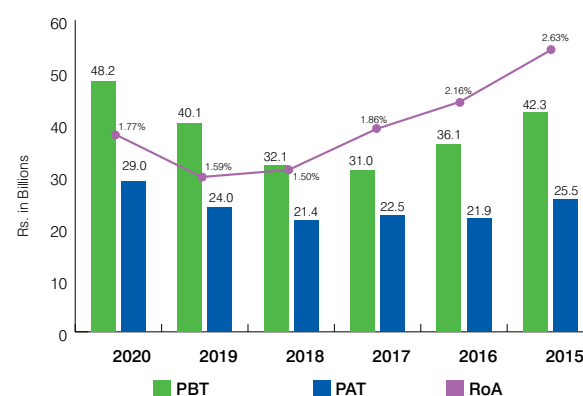

## Vertical Analyses

Vertical analysis depicts higher concentration levels of investments and advances in the asset base of the Bank. The advances base of the Bank had posted growth till 2019 with the concentration levels of advances in the total assets mix improving from 30% in 2015 to 33% in 2019. However, the decline in advances witnessed during 2020 due to lack of credit extension opportunities within

the Bank's defined risk appetite and the consequent diversion of excess liquidity towards the investment book has diluted advances concentration in the total asset mix; hence falling to 26% in 2020.

**Advances Concentration Level**

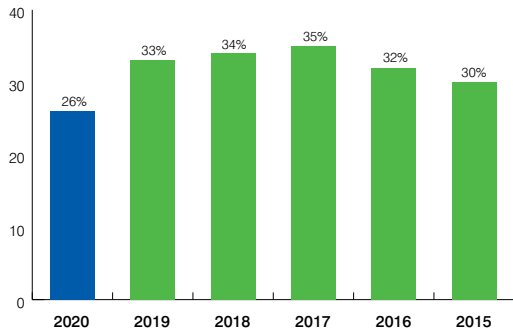

The IDRs of the banking industry registered a huge spike in the year 2015 on account of higher yielding longer term bonds being offered. However, based on the call that interest rate cycle has bottomed out, a gradual shift to shorter term securities with increased focus on credit was observed. Resultantly, the concentration levels of investments declined from 56% in 2015 to 49% in 2019. In 2020, deployment of excess liquidity in the investment portfolio has increased concentration levels of investments to 58%.

**Investments Concentration Level**

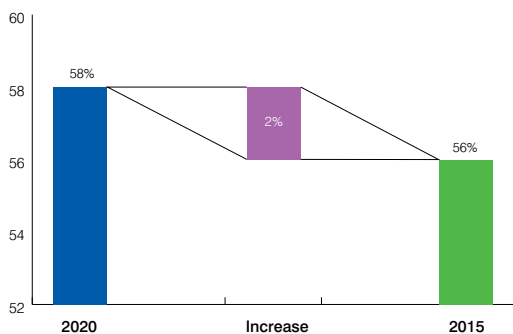

Corresponding to the technological, infrastructural and operational spend by the Bank, the deposit base has increased over the period of six years. Improved service quality levels and tailored products have earned the loyalty of our customers. This can be substantiated by the fact that the CASA base of the bank has remained over 90% over period under review; in turn reflecting management's strategic focus of improving Bank's deposit base and proactively monitoring its cost mix.

Markup income growth has been steady over the last 6 years. The contribution from markup income approximates 88% of the total revenue. Markup expense has increased over the last 6 years based on regulatory

revisions enacted over the period and growth registered in the deposit base.

Concentration of non-markup income in the total income has increased from 17% in 2014 to 20% in 2017. However, the last 3 years have witnessed a slight dilution on account of rising gross markup income whose concentration in the total revenue increased from 80% in 2017 to 88% in 2020 on account of volumetric growth and rising interest rates. Non markup expense concentration level has declined from 24% in 2015 to 22% in 2020 despite of increase in business which is due to various cost control initiatives.



## Segment Analysis

A segment is a distinguishable component of the Bank that is engaged in providing products or services (business segment) or in providing products or services within a particular economic environment (geographical segment), which is subject to risks and rewards that are different from those of other segments. The Bank's primary format of reporting is based on business segments.

### Retail

This includes retail lending and deposits, banking services, cards and branchless banking.

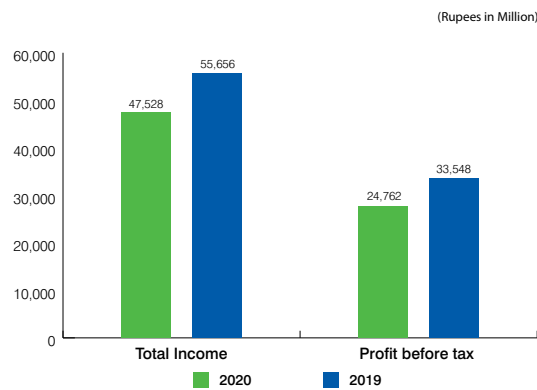

### Corporate

This comprises of loans, deposits, project financing, trade financing, investment banking and other banking activities / with Bank's corporate and public sector customers including the Bank's overseas operation.

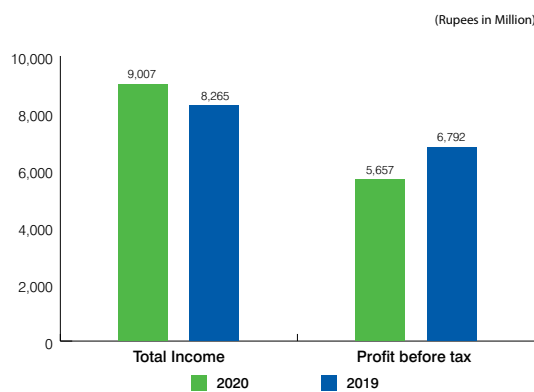

### Consumer

This segment primarily constitutes consumer financing activities with individual customers of the Bank. Product suites offered to these customers include credit cards, auto loans, housing finance and personal loans.

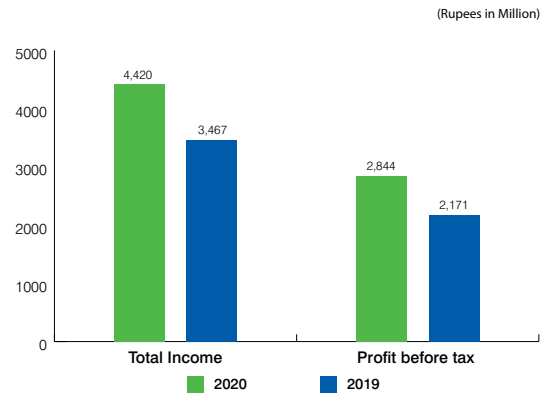

### Treasury

This includes fixed income, equity, foreign exchange, credit, funding, own position securities, lendings and borrowings and derivatives for hedging and market making.

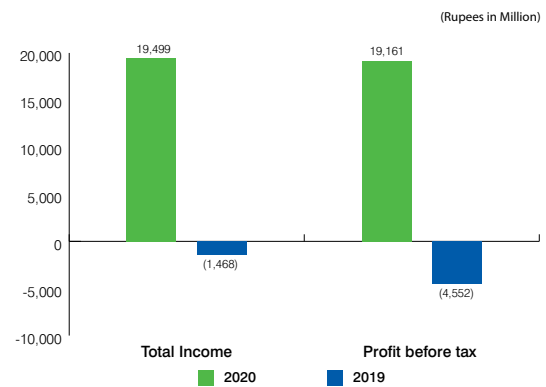

### International

This comprises of loans, deposits, project financing, trade financing, investment banking and other banking activities / with Bank's corporate and public sector customers including the Bank's overseas operation.

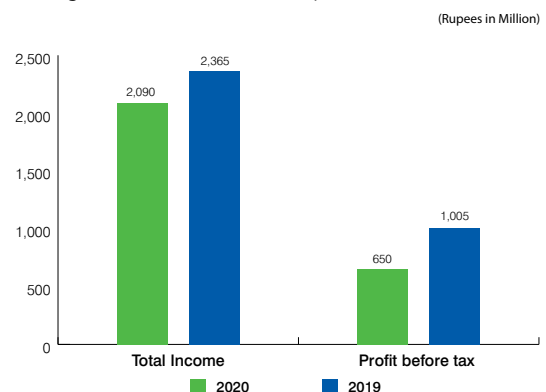

# Geographical Segment

The Bank operates in following geographic regions:

## Pakistan

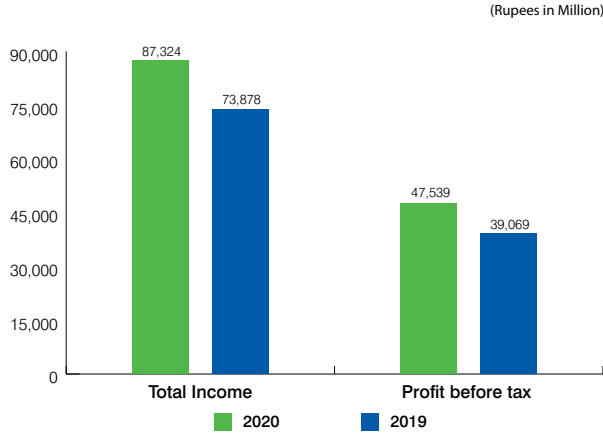

## Middle East

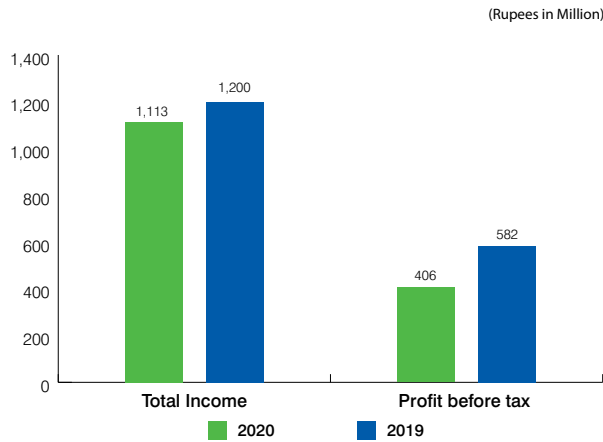

## South Asia

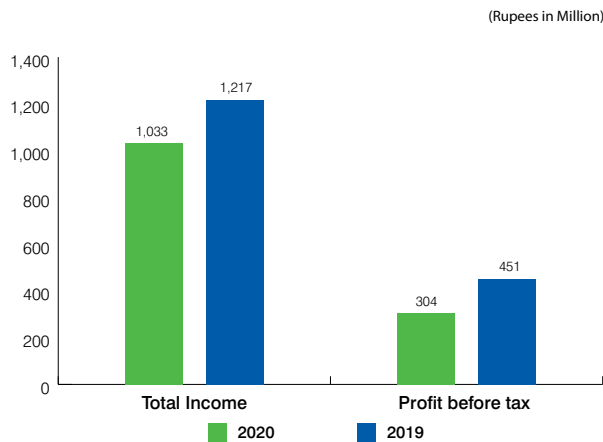

## Statement of Charity and Donation

Statement of charity fund management by MCB Islamic Bank Limited ( Wholly owned subsidiary of MCB Bank Limited)

|                                                                                                      | 2020             | 2019     |
|------------------------------------------------------------------------------------------------------|------------------|----------|
|                                                                                                      | (Rupees in '000) |          |
| <b>Reconciliation of charity fund balance</b>                                                        |                  |          |
| Opening balance                                                                                      | 57,782           | 25,402   |
| Additions during the year                                                                            |                  |          |
| - Received from customers against late payment                                                       | 42,477           | 45,958   |
| - Dividend purification amount                                                                       | 771              | 7,383    |
| - Profit on charity saving account                                                                   | 2,085            | 1,539    |
|                                                                                                      | 45,333           | 54,880   |
| Charity paid during the year                                                                         | (56,500)         | (22,500) |
| Closing balance                                                                                      | 46,615           | 57,782   |
| <b>Charity was paid to the following institutions:</b>                                               |                  |          |
| The Patients' Bahbood Society for AKUH                                                               | 1,000            | 1,000    |
| Al-Khidmat Foundation                                                                                | 2,000            | -        |
| Arthritis Care                                                                                       | 2,000            | 1,000    |
| Aziz Jehan Begum Trust for the Blind                                                                 | 3,000            | 1,000    |
| Chiniot Anjuman Islamia                                                                              | 1,000            | -        |
| Chiniot Blood Bank and Dialysis Centre                                                               | 1,000            | -        |
| Family Welfare Society                                                                               | 3,000            | 1,000    |
| Fatmid Foundation                                                                                    | 3,000            | 1,000    |
| Indus Hospital                                                                                       | 5,000            | 2,000    |
| Infaq Memorial Trust                                                                                 | 3,000            | 1,000    |
| Layton Rehmatullah Benevolent Trust                                                                  | 4,000            | 2,000    |
| Mind Organization                                                                                    | 2,000            | 1,000    |
| Pink Ribbon                                                                                          | 2,000            | 5,000    |
| Saleem Memorial Trust Hospital                                                                       | 6,000            | -        |
| Saylani Welfare                                                                                      | 2,000            | -        |
| Shaukat Khanam Memorial Cancer Hospital                                                              | 3,000            | 2,000    |
| Sindh Institute of Urology & Transplantation (SIUT)                                                  | 3,000            | 2,000    |
| The Citizens Foundation                                                                              | 4,000            | 2,000    |
| Jahandad Society for Community Development                                                           | 1,500            | -        |
| The Lahore Hospital Welfare Society                                                                  | 2,000            | 500      |
| Al - Mustafa Welfare Society                                                                         | 500              | -        |
| Frontier Foundation blood transfusion Centre                                                         | 500              | -        |
| Zubaida Medical Center                                                                               | 1,000            | -        |
| Mofad e Amma Chiniot Sheikh Association                                                              | 1,000            | -        |
|                                                                                                      | 56,500           | 22,500   |
| <b>In addition to the above charity, detail of donation by the Bank is given below:</b>              |                  |          |
| Murshid Hospital & Health Care Centre                                                                | -                | 100      |
| Saleem Memorial Trust Hospital                                                                       | 95,000           | -        |
| Specialized Healthcare and Medical Education Department,<br>Government of Punjab - (COVID 19 relief) | 9,996            | -        |
| Jahandad Society For Community Development                                                           | 5,000            | -        |
| District Administration Lahore - (COVID 19 relief)                                                   | 2,600            | -        |
|                                                                                                      | 112,596          | 100      |

## Market Statistics of MCB Share

|                    | Share Prices    |            |                | Free Float    |        | Market Capitalisation |             |
|--------------------|-----------------|------------|----------------|---------------|--------|-----------------------|-------------|
|                    | MCB Scrip (Rs.) |            |                | Share ('000s) | %      | Capital (Mln)         | Value (Mln) |
| <b>2020</b>        | <b>High</b>     | <b>Low</b> | <b>Closing</b> |               |        |                       |             |
| December 31, 2020  | 186.22          | 164.12     | 185.28         | 401,668       | 33.89% | 11,851                | 219,568     |
| September 30, 2020 | 183.29          | 160.33     | 173.82         | 402,073       | 33.93% | 11,851                | 205,987     |
| June 30, 2020      | 166.42          | 146.13     | 162.07         | 402,267       | 33.94% | 11,851                | 192,063     |
| March 31, 2020     | 224.53          | 132.89     | 149.28         | 401,560       | 33.89% | 11,851                | 176,906     |

|                    |        |        |        |         |        |        |         |
|--------------------|--------|--------|--------|---------|--------|--------|---------|
| <b>2019</b>        |        |        |        |         |        |        |         |
| December 31, 2019  | 216.20 | 164.12 | 204.94 | 401,261 | 33.86% | 11,851 | 242,866 |
| September 30, 2019 | 178.31 | 154.04 | 169.57 | 400,424 | 33.79% | 11,851 | 200,951 |
| June 30, 2019      | 195.96 | 168.62 | 174.45 | 388,570 | 32.79% | 11,851 | 206,734 |
| March 31, 2019     | 212.51 | 187.98 | 196.53 | 389,775 | 32.89% | 11,851 | 232,900 |

| Dividend and Bonus   | 2020   |     | 2019  |    |
|----------------------|--------|-----|-------|----|
|                      | Mln    | %   | Mln   | %  |
| Final cash dividend  | 17,775 | 150 | 5,925 | 50 |
| 3rd interim dividend | -      | -   | 4,740 | 40 |
| 2nd interim dividend | -      | -   | 4,740 | 40 |
| 1st interim dividend | 5,925  | 50  | 4,740 | 40 |

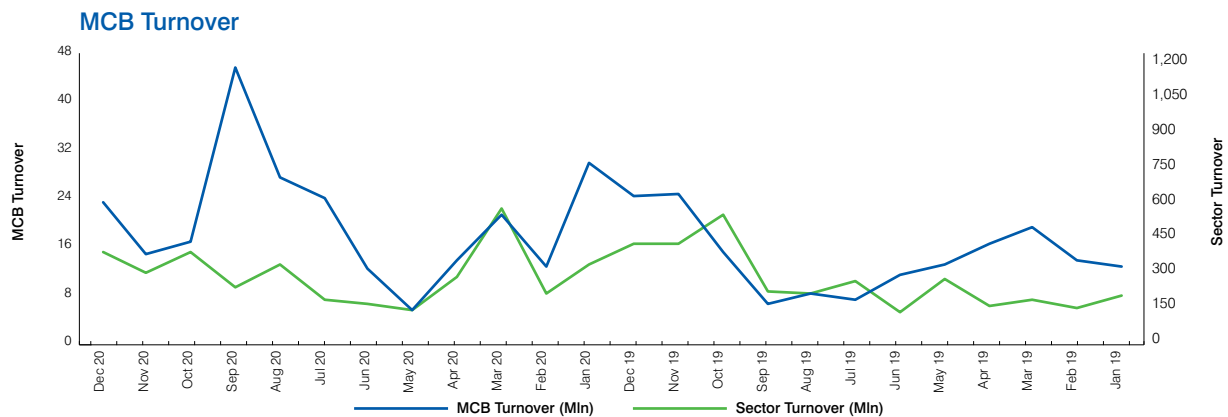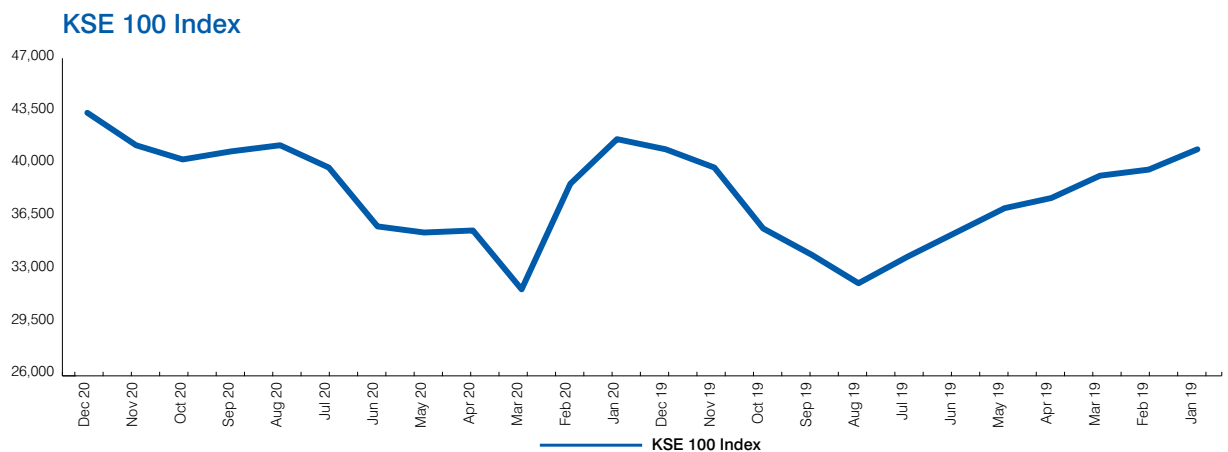

## Share Price Sensitivity Analysis

Factors that can influence the share price of MCB Bank Limited are given below:

### Discount rate / Monetary Policy

Based on different assessment parameters, the State Bank of Pakistan can change the monetary policy rate. Any volatility in the interest rates might impact revenue and profitability of the Bank.

### Minimum Rate of Return on Deposits/Regulatory Risk

Any upward revision in the minimum deposit rate will result in compression in net interest margins earned due to increased cost of deposits. Such revision can negatively impact the earning and correspondingly the share price of the scrip.

### Inflation

Inflation is considered as a key determinant for policy rate change. Any uptick in the inflation statistics will have a corresponding impact on the monetary policy rate. With higher discount rates, the Banks will be able to invest in high yielding investments, thus resulting in increased profitability. This, in turn will have a positive impact on the share price.

### Political Stability & Law and order situation

Political stability and controlled law & order situation is a pre-requisite for any economic development. This in turn reposes investor confidence in the soils of Pakistan, making our corporates a potential investment opportunity. However, any act of terrorism or political instability can negatively impact the equity market and share prices of traded stocks.

### Sensitivity Analysis of Change in Market Capitalization

Share Price as of December 31, 2020

Rs. 185.28

Market Capitalization as of December 31, 2020

Rs. 219,568 Millions

Change in Share Price by

Change in Market Capitalization

+10%

Rs. 21,957 Millions

-10%

Rs. (21,957) Millions

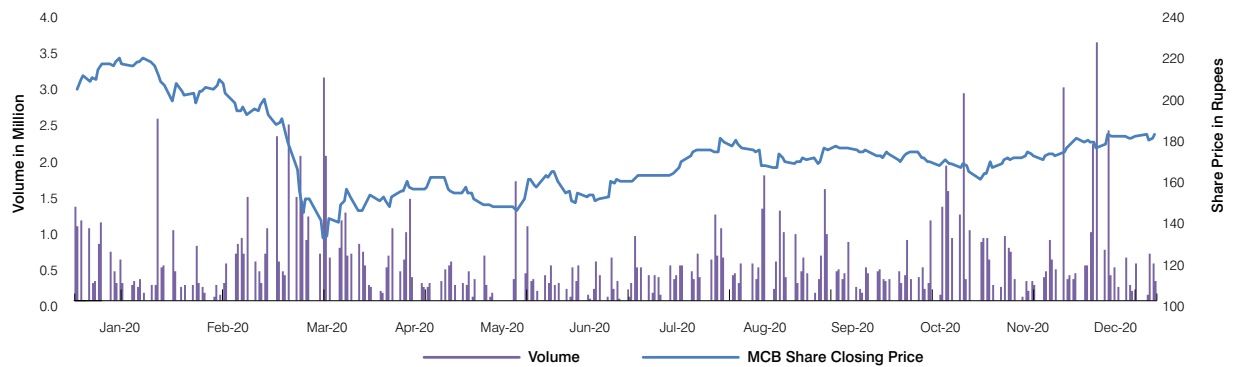

## Other Information

### Forced Sales Value in case of Revaluation of Property, Plant & Equipment

The Bank engages professionally qualified and independent valuers, with sufficient regularity, for carrying out revaluation of its land and buildings in order to ensure that their net carrying amounts do not differ materially from their fair value.

The latest of such exercises was conducted as at December 31, 2019, wherein an additional revaluation surplus of Rs. 7,290.966 million was recognized against land and buildings. The total market value and FSV of these land and buildings stood at Rs. 43,552.234 million and Rs. 34,841.787 million respectively.

### Particulars of Significant/Material Assets and Immovable Property

MCB has sustained a strategic focus on strengthening its network, through branch expansion plan, in order to improve market coverage through increased customer touchpoints and widen the outreach of its service offerings; while simultaneously contributing towards the SBP's objective of expanding financial inclusion in the underbanked and unbanked segments of the society.

The Bank's network, as at December 31, 2020, extends across more than 1400 branches and offices. Of these, 356 premises are owned by the Bank and represent a material infrastructural investment of Rs. 40.016 billion towards immovable properties (79% of total investment in Property and Equipment).

### Reasons for Not Declaring Dividend despite Earning Profits and Future Prospects of Dividend:

The Board of Directors declared a final cash dividend of Rs. 15 per share for the year ended December 31, 2020, which is in addition to the Rs. 5 per share of interim dividend already paid to the shareholders for the quarter ended March 31, 2020, taking the dividend payout ratio to 81.63%. However during the year, as a precautionary measure to conserve capital and enhance the liquidity and stress absorption capacity of the banks during the COVID-19 pandemic, State Bank of Pakistan (SBP) vide its circular BPRD/BA&CPD/006315/20 dated April 22, 2020, advised the banks to suspend paying dividend for the first two quarters of 2020. Banks which had already approved dividend for the first quarter at the time of dissemination of instructions were advised by the SBP to suspend dividend distribution for the next two quarters i.e. ending June 2020 and September 2020. Hence, meticulously complying with the SBP's instructions, MCB did not declare dividend for the second and third quarters of 2020.

Dividend payout is expected for the year 2021 as the Bank manages this from the profitability generated while ensuring that sufficient capital buffers are available with the institution to meet regulatory requirements. Future prospects on the Bank's performance have been covered within the "Forward Looking" section of the Annual Report.

### Outstanding & Overdue Payments on account of Taxes, Duties, Levies etc.

The Bank is a regular and timely payer of taxes, duties, levies etc. and there are no outstanding or overdue payments in regards thereof.

### Management's Assessment of Sufficiency of Tax

The Bank maintains sufficient provision for taxation as required under the accounting standards and the relevant regulations. Contingencies with respect to the direct or indirect taxation have been disclosed in the Note 24 to these financial statements. Based on the comparisons of tax provision recognized in the financial statements for last three years vis-a-vis tax assessments, the management assesses that the provision of taxation maintained had been sufficient for its purposes.

### Particulars of Loans/Advances and Investments in Foreign Companies or Undertakings

The Bank's overseas branches in Bahrain, UAE and Sri Lanka invest and lend to companies and undertakings operating in their jurisdictions. Details are given in note 42 of unconsolidated finance statements. Further the Bank hold 99.94% shareholding in "MCB Non-Bank Credit Organization "Closed Joint Stock Company" Azerbaijan.

### Disclosures beyond BCR Criteria:

Over the recent years, there have been significant developments in the corporate reporting domain, particularly in relation to the amount of details included in the entities' annual reports, as well as the importance ascribed by users to the information beyond the audited financial statements and the auditor's report thereon.

There has been an evolution in the manner in which entities disseminate and communicate information to their stakeholders as users attach increasingly greater importance to supplementary information and look for better ways to inform their analysis and confirm understanding of more complex areas in the financial statements.

Considering this emerging necessity, MCB strives to go beyond the realm of essential reporting requirements in order to disclose all relevant information that facilitates the stakeholders in understanding various aspects of the Bank's operational and financial performance. Following is the list disclosures that have been made in addition to the BCR criteria:

- President/CEO review
- Statement on Internal Controls
- Customer Grievance Handling Mechanism
- Groups' Performance Reviews
- Staff Compensation/Remuneration Policy
- Detail of Management Committees

- Risk Management Framework
- Green Banking
- Six Years' – Non Financial Performance 2015-2020
- Six Years summary of operating expenses
- Six Years summary of markup and non-markup income
- Six Years' – Maturity of Assets & Liabilities
- Key interest bearing Assets and Liabilities
- Group-wise Advances and Deposits
- Top 10 Listed equity holding of the Bank
- Statement of Charity & Donations
- Investor Awareness through Jama Punji Initiative by the Securities & Exchange Commission of Pakistan

### President's Review

The President/CEO's video message on the Bank's business performance and strategy is available at: <https://www.mcb.com.pk/investor-relations/ceo-message>

### Group Structure

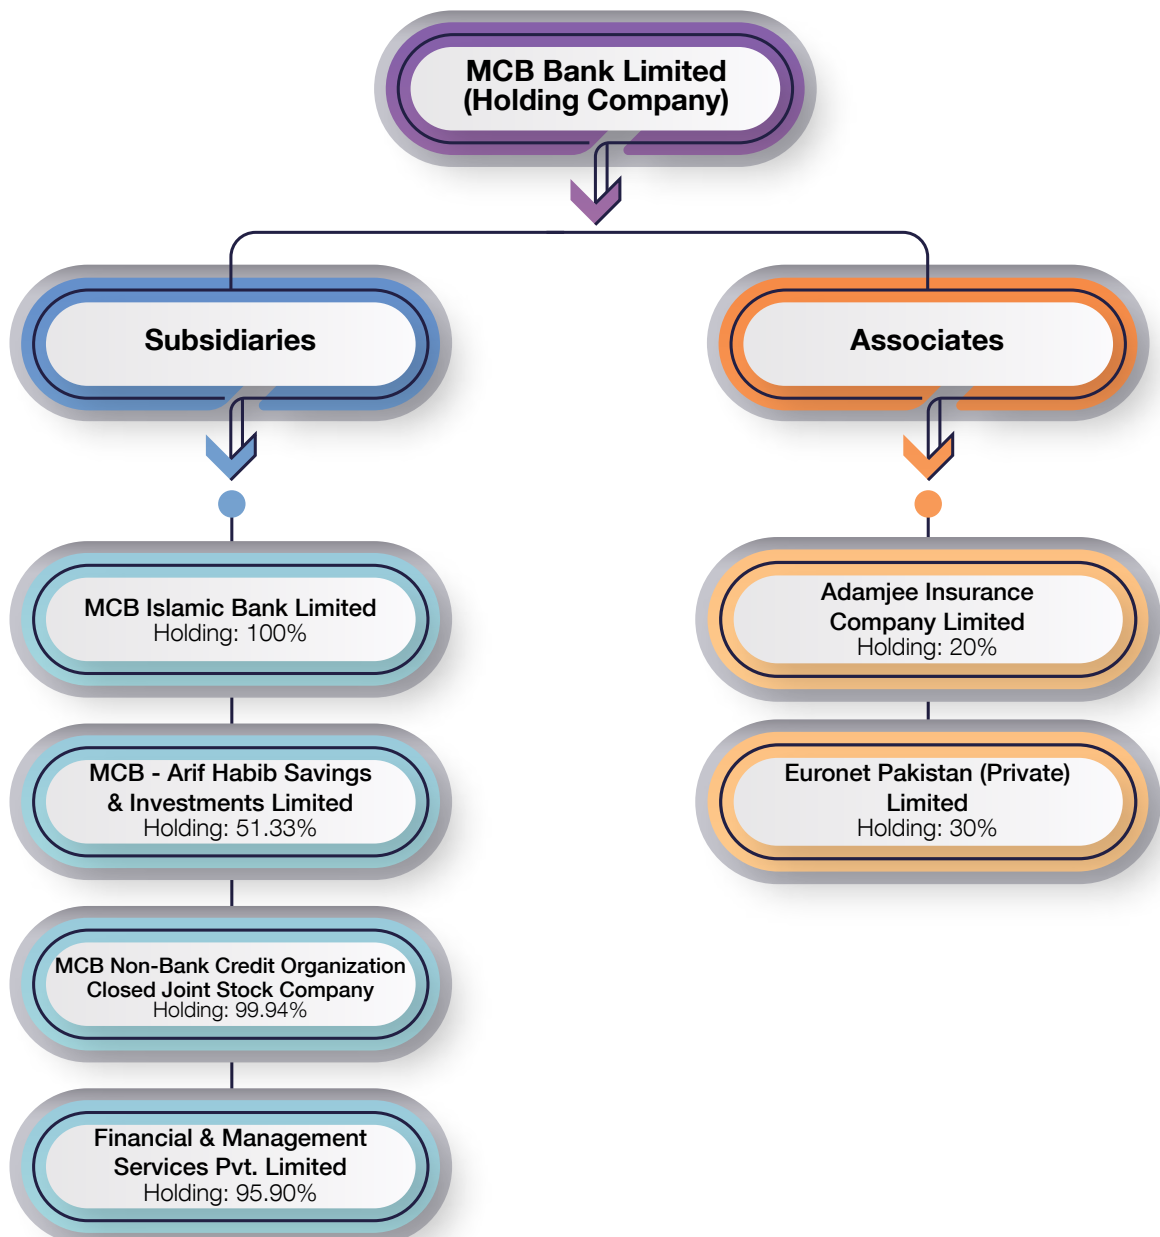

## MCB Calendar of Major Events

| Factors                                              | Source            |
|------------------------------------------------------|-------------------|
| Annual Results - 2019 issued on                      | February 04, 2020 |
| 72 <sup>nd</sup> Annual General Meeting held on      | March 19, 2020    |
| 1 <sup>st</sup> Quarter Results issued on            | April 24, 2020    |
| 2 <sup>nd</sup> Quarter Results issued on            | August 20, 2020   |
| 3 <sup>rd</sup> Quarter Results issued on            | October 27, 2020  |
| Annual Results - 2020 issued on                      | February 10, 2021 |
| 73 <sup>rd</sup> Annual General Meeting scheduled on | March 27, 2021    |

| Calendar of Major Events                                                        |      |
|---------------------------------------------------------------------------------|------|
| Incorporation                                                                   | 1947 |
| Nationalisation                                                                 | 1974 |
| Investment in First Women Bank                                                  | 1989 |
| Privatisation                                                                   | 1991 |
| Incorporation of MCB Financial Services Limited                                 | 1992 |
| Incorporation of MNET Services (Private) Limited                                | 2001 |
| Investment in Adamjee Insurance Company Limited                                 | 2004 |
| Incorporation of MCB Trade Services Limited                                     | 2005 |
| Incorporation of MCB Asset Management Company Limited                           | 2005 |
| Change of name from Muslim Commercial Bank Limited                              | 2005 |
| Issuance and Listing of Global Depository Receipts on London Stock Exchange     | 2006 |
| Strategic acquisition by Maybank                                                | 2008 |
| Incorporation of MCB Leasing Closed Joint Stock Company                         | 2009 |
| Investment in Euronet Pakistan (Private) Limited                                | 2011 |
| Amalgamation of MCB Asset Management Company with Arif Habib Investment Limited | 2011 |
| Incorporation of MCB Islamic Banking Limited - a subsidiary company             | 2014 |
| Merger of NIB Bank with and into MCB Bank Limited                               | 2017 |
| Merger of MNET Services (Private) Limited with and into MCB Bank Limited        | 2019 |
| Disposal of MCB Financial Services Limited                                      | 2020 |



## Strategic & Resource Allocation

Execution of a well-defined strategy has been the key pillar for our growth momentum over the last many years. Our strategy broadly covers what we want to achieve in the short and long run duly focusing on the challenges posed by the macroeconomic imbalances;

### Strategic Objectives:

Short, medium and long term objectives of the Bank to meet its mission statements are as follows:

|                    |                                                                                                                                                                                                                                                                                                                                                                                                                                                                               |
|--------------------|-------------------------------------------------------------------------------------------------------------------------------------------------------------------------------------------------------------------------------------------------------------------------------------------------------------------------------------------------------------------------------------------------------------------------------------------------------------------------------|
| <b>Short term</b>  | <ul style="list-style-type: none"> <li>• Increase focus on digitalization and automation of processes to enhance efficiency, reduce cost and improve customer satisfaction and improve risk/ compliance standards;</li> <li>• To ensure quality asset retention with measures to constantly decrease the NPLs base of the Bank;</li> <li>• To increase the current account concentration levels of the institution by capitalizing on the opportunities presented.</li> </ul> |
| <b>Medium term</b> | <ul style="list-style-type: none"> <li>• To be a top stakeholder value generator in Pakistan's banking sector while remaining a socio-environmentally conscious citizen;</li> <li>• The Bank aims to increase its share in the domestic deposit pie;</li> <li>• To maintain a strong capital base;</li> </ul>                                                                                                                                                                 |
| <b>Long term</b>   | <ul style="list-style-type: none"> <li>• Delivering remarkable returns to stakeholders, sustainable performance exceeding market and shareholder expectations;</li> <li>• Providing value added services through operational expansion, geography and upgraded system;</li> <li>• Building a corporate culture of equality, trust and team spirit as we remain dedicated to being a socially responsible organization;</li> </ul>                                             |

For strategy formulation, the Bank follows a structured approach to map itself in the industry / operating environment through detailed competitive position assessment, peer group analysis and macro-economic & thematic reviews; in turn laying the foundation for its future road map.

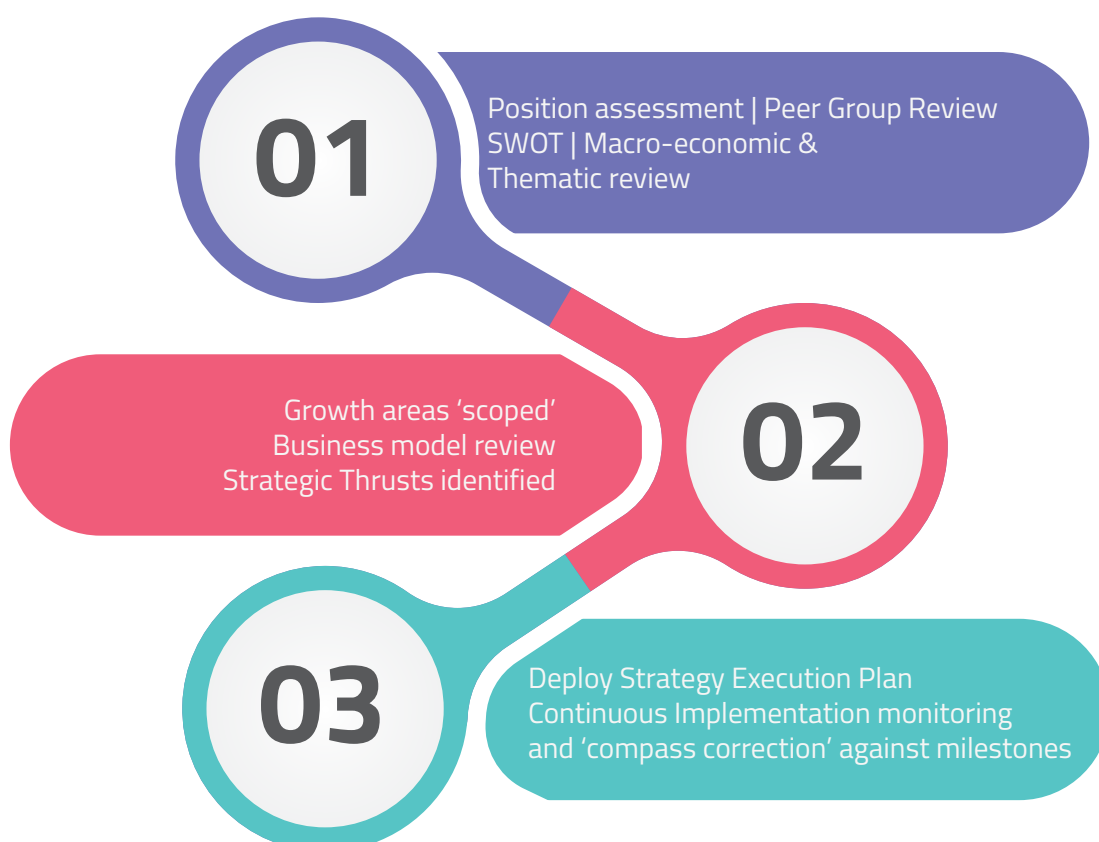

## Strategies in place:

From customer service standpoint, special focus remains on improving our service quality and service standards levels. We will integrate service standards across all the channels and outlets in the network to provide a uniform customer experience.

We will endeavor to meet expectations of our valued customer base. Another important aspect remains credit quality and our refined risk appetite. We will thereby give value to our customers across the entire spectrum of retail, corporate and SME while improving our asset quality.

Under the Corporate plan, we also intend to expand our geographical boundaries by being open to potential new business models, innovative processes and delivery channels, enabling provision of 24x7 customer services.

Today, technology is a major component of the competitive edge of any bank. With millennial being an increasing percentage of our customer base, we have to cater to their expectations and it requires leveraging cutting edge technology. The other side of the coin however, is that technology brings risks with it. We will go the extra mile, to ensure our assets and those of our customers are secure and sensitive information is protected.

To ensure efficient and effective operation of the Bank we need systems and processes that operate seamlessly. This is another focus area where we will concentrate on identifying pain points and gaps, and make the necessary modifications.

To safeguard the financial stability and the reputation of the Bank, good governance and ethical conduct are imperative. While we already have high standards in these areas, we have set our benchmarks as the best in class practices in the country. We will renew and re-energise our focus on sustainability by ensuring that we continue to maintain a judicious balance between economic, social and environmental objectives.

The end result of all the above will be the enhancement of our brand. The brand is a mirror of our image in the eyes of our customers, both legacy and millennials. Through the strategies spelt out in our corporate plan we will forge ahead, building our brand, increasing our assets and profitability, while delivering increasing value to all our stakeholders.

## Method and Assumptions in Compiling Indicators

The Bank identifies its indicators which effectively reflect Bank's performance.

The bank analyses its market positioning, competitors and general market conditions while compiling its indicators. The Bank analyses deposits, advances, capital and risk adequacy ratios, gross profit after tax and EPS on a regular basis to gauge its performance. These are the basic indicators of Bank's financial performance and profitability.

Market price is a measure of Bank's perception in the market. The difference between book value and market value shows investor's confidence on the script.

The Bank manages its dividend payout in line with the profitability generated during the year while ensuring that sufficient capital buffers are available with the institution to meet regulatory requirements. Dividend is the amount allocated out of profit for paying cash to the shareholders. The dividend payment is an indicator of how well earnings support the dividends. The Bank takes its decisions of cash or stock dividend based on market conditions, share price and governing laws and regulations.

Comparing cash flow from operating activities with profit before tax can give insights into how a Bank generates funds and manage the cash flows. The bank regularly analyses its cash flows and strives to keep it on positive side.

## Change in Indicators and Performance Measures:

Key performance indicators (KPIs) provide understanding of the Bank's performance in key areas. These indicators are used as a gauge to analyze current standing of the Bank and likely path the Bank would follow.

MCB has identified KPIs that are critical to its business. While identifying KPIs, the Bank analyzed various indicators, their interpretations and accordingly the extent to which they may correctly and clearly communicate the Bank's performance. Change in important indicators is discussed in performance and position section.

Key performance indicators to measure the objectives are as follows:

| Strategic objectives                                                                                                                                                                                      | Strategies for Meeting Objectives                                                                                                                                                                                                                                                                                                                                                                                                                                                                                                                                                                                                  | KPI                                  | Future relevance                            |
|-----------------------------------------------------------------------------------------------------------------------------------------------------------------------------------------------------------|------------------------------------------------------------------------------------------------------------------------------------------------------------------------------------------------------------------------------------------------------------------------------------------------------------------------------------------------------------------------------------------------------------------------------------------------------------------------------------------------------------------------------------------------------------------------------------------------------------------------------------|--------------------------------------|---------------------------------------------|
| Increase focus on digitalization and automation of process to enhance efficiency, reduce cost and improve customer satisfaction and improve risk and compliance standards.                                | <p>Centralization and monitoring of operating expenses to restrain them within conventional limits.</p> <p>Work on automation of existing manual systems. Gradual investment on unified digital platform for an overwhelming customer experience.</p> <p>Manage Information security risks through development, documentation and implementation of policies, standards, procedures and guidelines that ensure confidentiality and integrity of sensitive information.</p>                                                                                                                                                         | Effective and efficient cost control | The KPI will remain relevant in the future. |
| To ensure quality asset retention with measures to constantly decrease the NPLs base of the Bank.                                                                                                         | <p>Increased focus on quality asset growth while maintaining low infection ratio.</p> <p>Focus on recoveries of existing NPL stock.</p>                                                                                                                                                                                                                                                                                                                                                                                                                                                                                            | Asset Quality                        | The KPI will remain relevant in the future. |
| To maintain a strong capital base                                                                                                                                                                         | Healthy equity leading to maintain strong capital adequacy ratios.                                                                                                                                                                                                                                                                                                                                                                                                                                                                                                                                                                 | Capital ratios                       | The KPI will remain relevant in the future. |
| <p>The Bank aims to increase its share in the domestic deposit pie; and</p> <p>To increase the current account concentration levels of the institution by capitalizing on the opportunities presented</p> | <p>Expansion/Increase in deposit base through new products and markets thereby increasing customer base beyond the prevalent organic growth.</p> <p>Increased focus on current account growth.</p>                                                                                                                                                                                                                                                                                                                                                                                                                                 | Deposit generation                   | The KPI will remain relevant in the future. |
| Delivering remarkable returns to stakeholders, sustainable performance exceeding market and shareholder expectations.                                                                                     | Higher profitability to pay higher returns to shareholders.                                                                                                                                                                                                                                                                                                                                                                                                                                                                                                                                                                        | Shareholder return                   | The KPI will remain relevant in the future. |
| Providing value added services through operational expansion, geography and upgraded system.                                                                                                              | <p>Lead market position through focused initiatives targeting new products, new markets, branchless banking and effective cost management.</p> <p>Rationalize &amp; optimize usage of existing branch network and network strengthening through branch expansion plan.</p> <p>Service portfolio enhancement of all digital products / channels i.e. call center, internet banking, mobile banking, mobile wallet, SMS alerts, E-statement, ATMs and Debit Cards to increase non markup income.</p> <p>Integrate service standards across all the channels and outlets in the network to provide a uniform customer experience.</p> | Improved services                    | The KPI will remain relevant in the future. |

|                                                                                                                                      |                                                                                                                                                            |                                 |                                             |
|--------------------------------------------------------------------------------------------------------------------------------------|------------------------------------------------------------------------------------------------------------------------------------------------------------|---------------------------------|---------------------------------------------|
| Building a corporate culture of equality, trust and team spirit as we remain dedicated to being a socially responsible organization. | Improve governance structure and update existing policies as per industry dynamics.<br>Generate economic activity through sustainable focused initiatives. | Corporate culture               | The KPI will remain relevant in the future. |
| To be a top stakeholder value generator in Pakistan's banking sector while remaining a socio-environmentally conscious citizen.      | Higher profitability to pay higher returns to shareholders.<br>Introduce socio environmental activities such as green banking to improve the brand name.   | Corporate social responsibility | The KPI will remain relevant in the future. |

### Resource Allocation Plan:

The inputs to the Bank's business processes are capitals, or stores of value, in various forms. Of these capitals, financial, manufactured and intellectual capitals are internal capitals owned by the Bank. The others, human, social, relationship and natural are external to the Bank.

Bank has resources to meet the strategic objectives. A transitory resource allocation plan is as follows:

| Nature of capital               | Resource allocation plan                                                                                                                                                                                                                                                                                                                  |
|---------------------------------|-------------------------------------------------------------------------------------------------------------------------------------------------------------------------------------------------------------------------------------------------------------------------------------------------------------------------------------------|
| Human capital                   | <ul style="list-style-type: none"> <li>• Redeploy human capital to enhance productivity through segmentation;</li> <li>• Undertake human capital capacity enhancement and capability building by focusing on trainings, talent management and talent retention;</li> <li>• Onboard versatile staff that can multi task easily.</li> </ul> |
| Manufactured capital            | <ul style="list-style-type: none"> <li>• Branch layout improvement and widening of branch and ATM network;</li> <li>• Re-align the business model through segmentation to increase the customer base.</li> </ul>                                                                                                                          |
| Financial Capital               | <ul style="list-style-type: none"> <li>• Investment on process automation and IT network improvements;</li> <li>• Invest on infrastructure including buildings and equipment;</li> <li>• Invest in good quality asset base with high yield.</li> </ul>                                                                                    |
| Natural capital                 | <ul style="list-style-type: none"> <li>• Introduce green building concept to branch network by introducing paperless environment and install solar energy equipment in branches;</li> <li>• Increase financing to renewable energy projects.</li> </ul>                                                                                   |
| Intellectual Capital            | <ul style="list-style-type: none"> <li>• Reengineering of processes to capture synergies and customer satisfaction;</li> <li>• Improvement in governance culture by utilizing over 73 years of institutionalized knowledge;</li> <li>• Introduce new products as per customer needs.</li> </ul>                                           |
| Social and Relationship Capital | <ul style="list-style-type: none"> <li>• Invest in a series of initiatives that enhance collaboration and ongoing dialogue with our customers;</li> <li>• Enhance brand image through public awareness campaigns;</li> </ul>                                                                                                              |

### Strategy to overcome liquidity problem:

Bank carries a substantial portfolio of marketable securities that can be easily traded and realized in known amounts of cash in the event of liquidity stress. Bank's Liquidity Coverage Ratio and Net Stable Funding Ratio are well over and above the regulatory requirement.

The Bank maintains strong liquidity position which is regularly monitored by the respective units. The liquidity ratios indicate the strong liquidity position of the institution. Liquidity position of the bank is discussed in the risk management section of the financial statements.

### Significant Plans and Decisions

During the year, the Bank, in line with the shareholder approval, disposed of its ownership stake in the wholly owned subsidiary namely MCB Financial Services Limited.

Except as mentioned above, there was no other significant event during the year.

### Significant changes in objectives and strategies:

MCB Bank objectives & strategies are well planned and are persistently implemented. No significant change occurred during the year to affect the objective and business strategies.

# Business Model

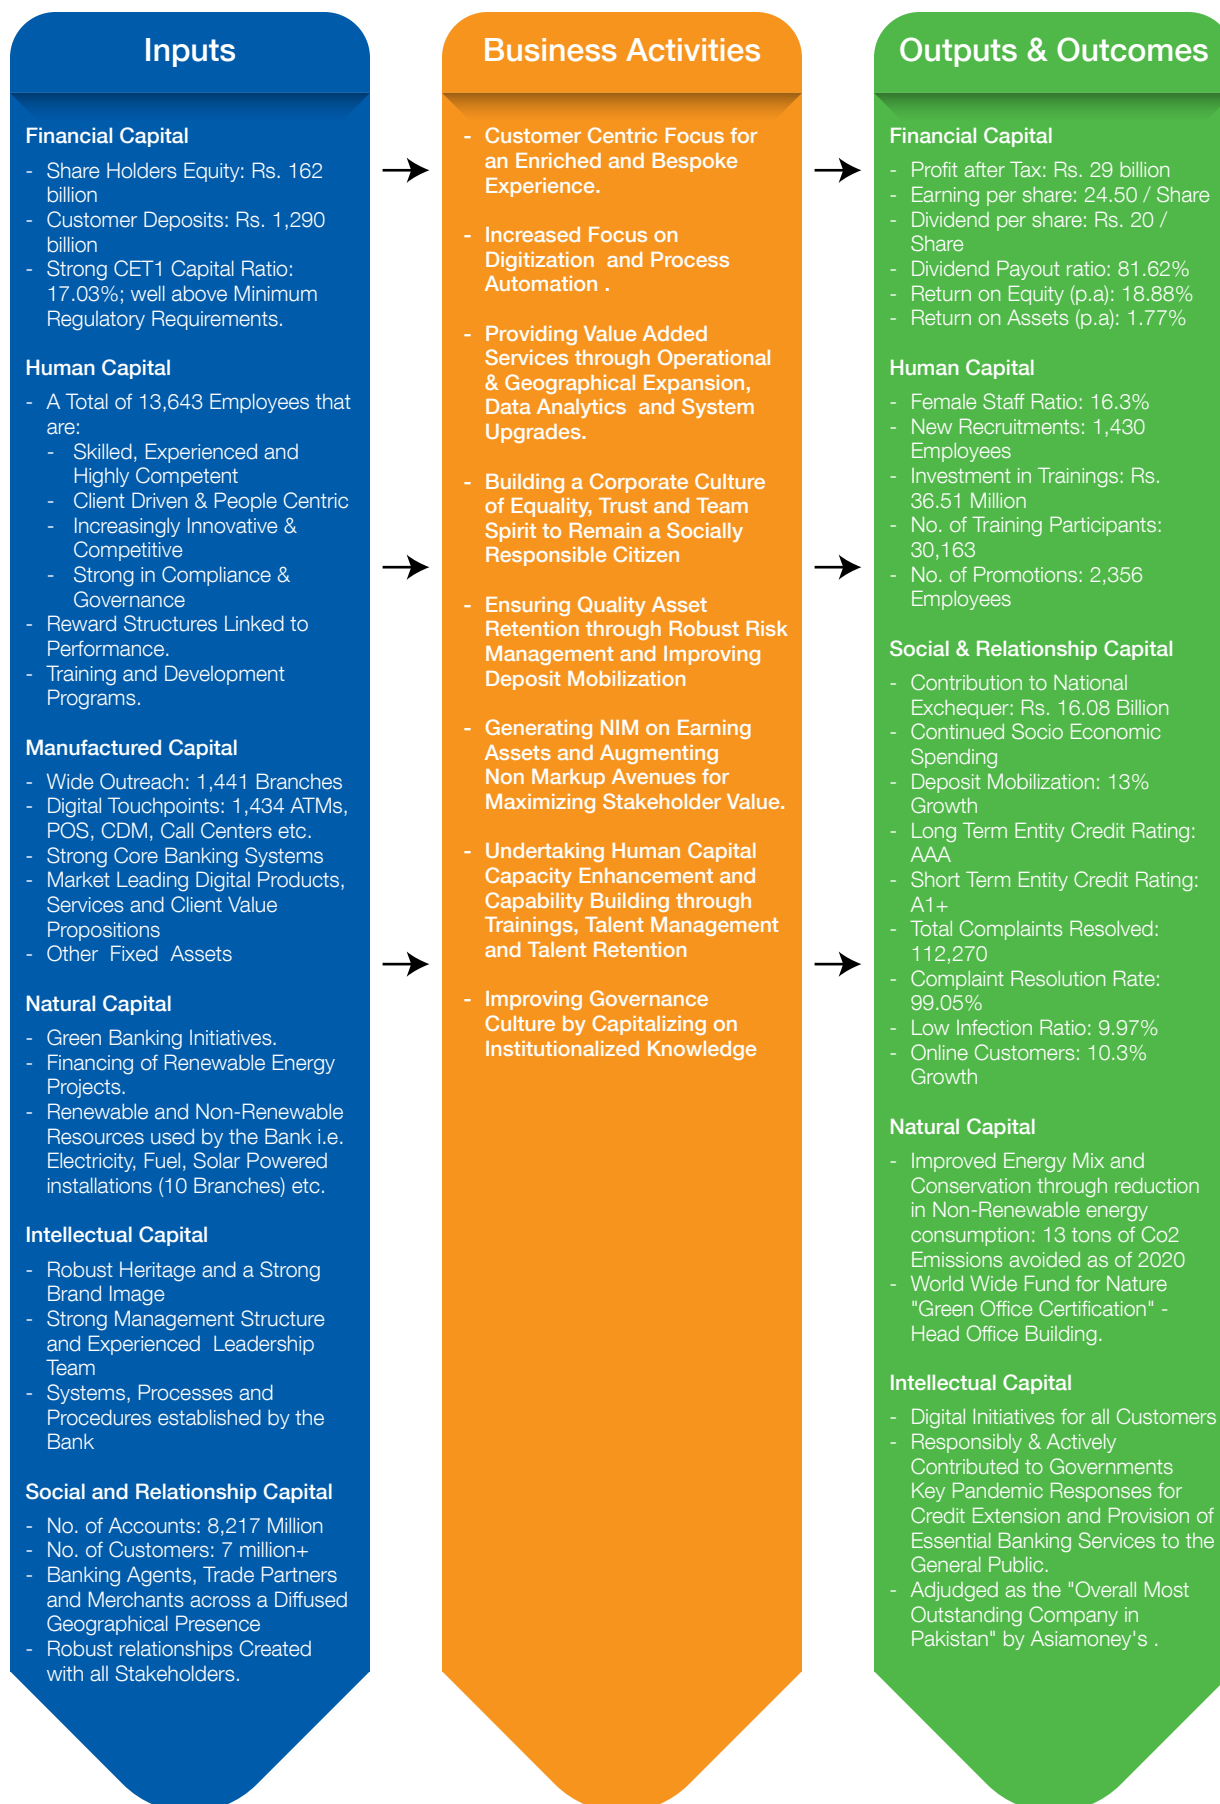

# Value Chain

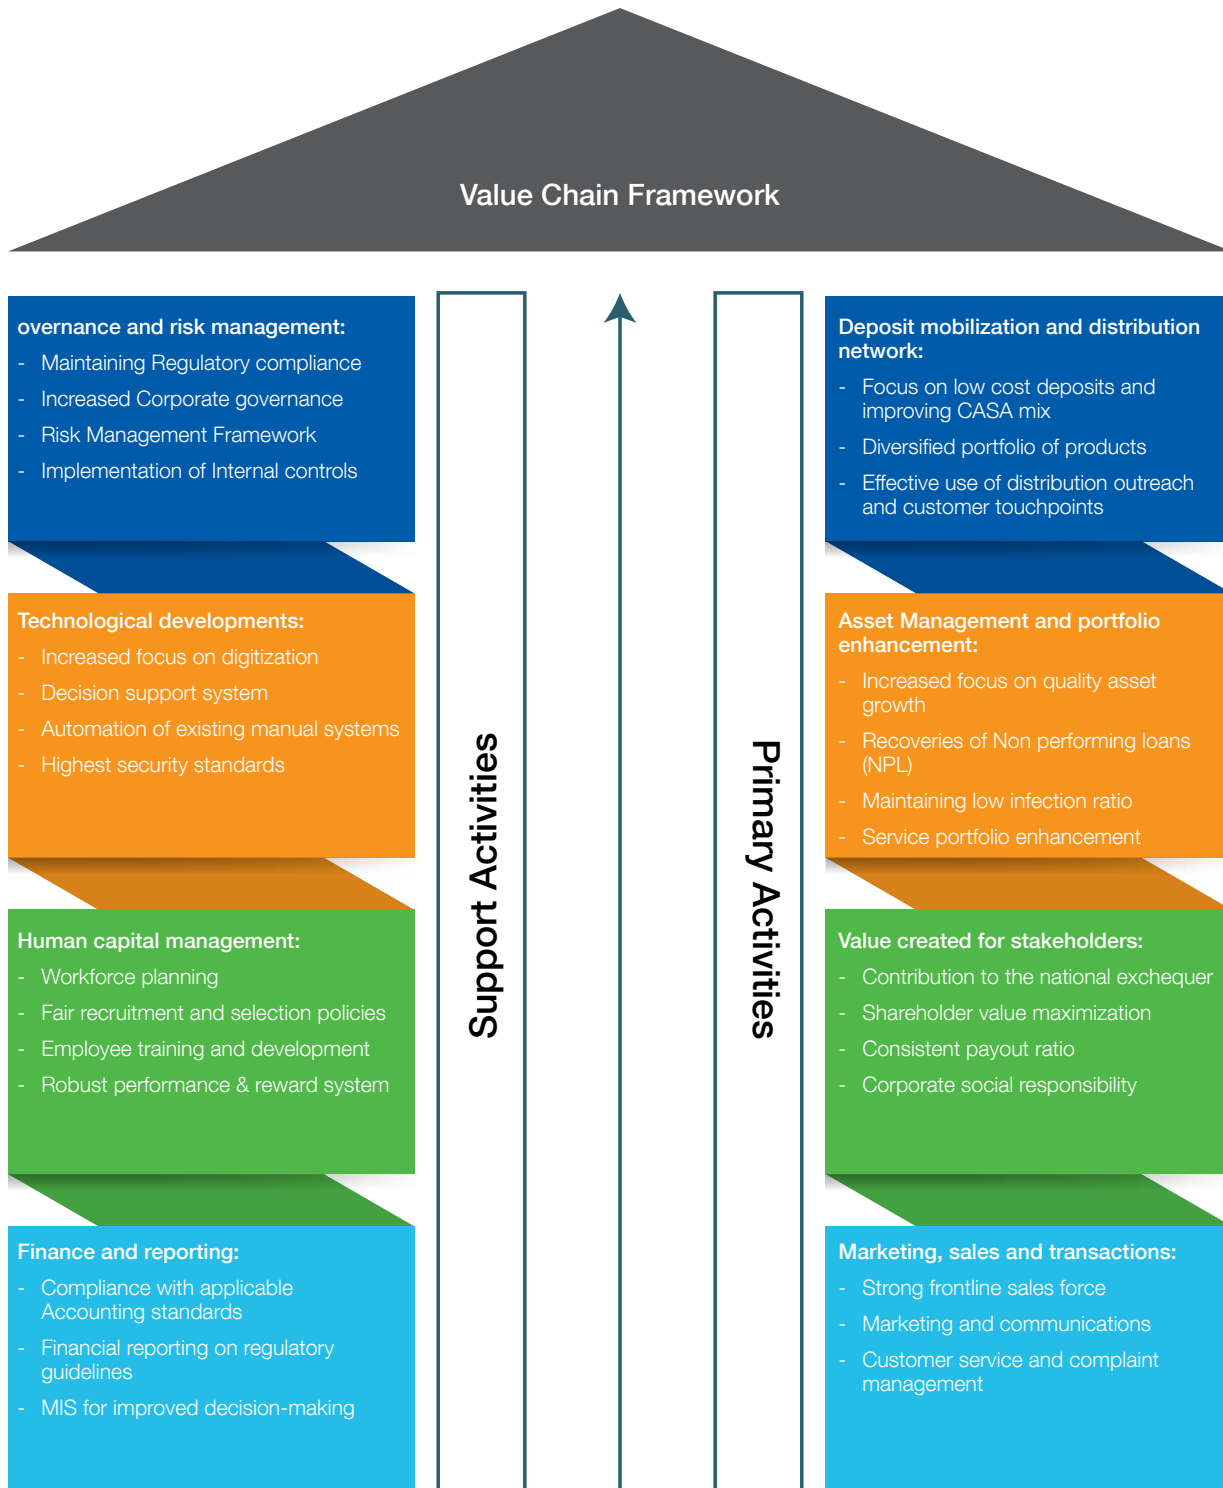

## Competitive Landscape and Market Positioning

| Factors                                                                                                                                                                                  | Implication                                                                                                                                                                                                                                                                                                                                                                                                                                                                                                                                                                                                                                                                                                                                                                                                                               | Corresponding Strategies                                                                                                                                                                                                                                                                                                                                                                                                                                                                                                                                                                                                                                                                                                                              |
|------------------------------------------------------------------------------------------------------------------------------------------------------------------------------------------|-------------------------------------------------------------------------------------------------------------------------------------------------------------------------------------------------------------------------------------------------------------------------------------------------------------------------------------------------------------------------------------------------------------------------------------------------------------------------------------------------------------------------------------------------------------------------------------------------------------------------------------------------------------------------------------------------------------------------------------------------------------------------------------------------------------------------------------------|-------------------------------------------------------------------------------------------------------------------------------------------------------------------------------------------------------------------------------------------------------------------------------------------------------------------------------------------------------------------------------------------------------------------------------------------------------------------------------------------------------------------------------------------------------------------------------------------------------------------------------------------------------------------------------------------------------------------------------------------------------|
| <p><b>Threat of new entrants and substitute products or services</b></p>  <p>Threat of new entrants</p> | <p>The large amounts of capital required to setup a bank along with the length of time consumed to establish a significant brand loyalty and the need to adhere to strict regulatory stipulations serve as strong entry barrier for new entrants.</p> <p>However, the domestic landscape has been evolving to include Fintech participants that are focusing on transactional services and innovative digital solutions for revolutionizing the customer banking experience.</p>                                                                                                                                                                                                                                                                                                                                                          | <p>Despite the imminent threat of new entrants and emerging Fintech disruptions, MCB is countering these threats by engaging in the following activities:</p> <ul style="list-style-type: none"> <li>• improving customer-brand relationship that goes beyond the minimum transactional services to retain customer loyalty;</li> <li>• investing substantially in digital platforms for improving customer convenience;</li> <li>• launching new products and services that cater to a diversified customer base; and</li> <li>• adhering with all regulatory guidelines with a view to ensure the highest levels of compliance.</li> </ul>                                                                                                          |
| <p><b>Bargaining power of customers</b></p>  <p>Bargaining power of customers</p>                       | <p>It is reasonably easy for retail customers to switch to other banks fully, or even avail part of their service requirements alternatively due to the low switching costs involved, hence shrinking the size of banking engagement. However, their bargaining power stays limited due to the minimal impact on the Bank's bottom line.</p> <p>The bargaining power of larger groups, corporate clients and high net worth individuals is comparatively greater since the rising competition has increased customers price sensitivity and the loss of sizable accounts and sources of revenue from them can substantially impact bank's profitability.</p>                                                                                                                                                                              | <p>MCB addresses the issue of customer bargaining power primarily by focusing on clearly directed customer retention and acquisition strategies; customer service standards are being continuously augmented, services are being tailored to suit individual needs, innovative solutions are being devised to make customer experiences more enjoyable, convenient and hassle-free and market competitive rates are being offered to effectively increase switching costs for customer</p>                                                                                                                                                                                                                                                            |
| <p><b>Bargaining power of suppliers</b></p>  <p>Bargaining power of suppliers</p>                     | <p>MCB's suppliers primarily comprise of its deposit-holders who are the Bank's key resource for capital and its employees, also known as the resource of labor.</p> <p>In an industry scenario with low differentiation, it is easy for the primary deposit-holder group to switch to other banks, tempted by higher rates and better service standards. Further, share of deposits is highly concentrated, which gives them excess bargaining power.</p> <p>With a view to fund gaps in the Bank's borrowings, MCB mobilizes debt from other financial institutions, with rates being largely market-driven. Hence, their bargaining power is often considered to be medium to high.</p> <p>When it comes to the bargaining power of suppliers of labor, individual employees barring major executives have little bargaining power</p> | <p>MCB has embraced following strategies in order to derive an edge over its supplier relationships:</p> <ul style="list-style-type: none"> <li>• providing a high degree safety to its capital providers including investors, deposit-holders and other banking partners; A point further re-enforced by Bank's highest local credit ratings of AAA/A1+ for long term and short term debt respectively;</li> <li>• creating mutually-beneficial solutions across the entire engagement spectrum; and</li> <li>• sustaining employee retention focus by offering a challenging, learning and conducive work environment which is duly complemented by career progression opportunities and market competitive salary and benefit packages.</li> </ul> |
| <p><b>Intensity of competitive rivalry</b></p>  <p>Industry rivalry</p>                               | <p>Intensity of competition within the domestic banking sector has grown over the years. Banks have focused on developing a wide range of asset and liability product offerings at competitive rates in order to reinforce their customer acquisition strategies and attract existing market share.</p> <p>The relatively low switching cost from one bank to another has further intensified the importance of competition within the industry, especially in the retail and commercial banking spheres.</p> <p>Traditional banking operating models have been disrupted as the outbreak of COVID-19 has challenged the existing banking landscape and paved way for the industry to adopt emerging technologies in rendering digital financial services amidst responsibly enforced social distancing and containment measures.</p>     | <p>MCB has initiated following measures with a view to consolidating and further improving its market share:</p> <ul style="list-style-type: none"> <li>• by distinguishing itself in the marketplace primarily on the basis of its history, experience and brand image; and</li> <li>• staying on the cutting edge of offering customer convenience and low-cost banking solutions.</li> </ul>                                                                                                                                                                                                                                                                                                                                                       |

# Risk Management Framework

Risk is an inherent part of banking business activities. The risk management framework and governance structure at MCB helps to mitigate and counter any foreseeable risk in its various lines of business. Risk awareness forms an integral part of strategic and operational activities of risk management. Through its Global Risk Management Policy, Bank sets the best course of action under uncertainty by identifying, prioritizing, mitigating and monitoring risk issues, with the goal of enhancing shareholders' value. Bank's risk management structure is based on the following five guiding principles:

- Optimizing risk/return in a controlled manner
- Establishing clear responsibility and accountability
- Establishing & maintaining independent and properly resourced risk management function.
- Promoting an open risk culture
- Adopting international best practices in risk management

The Bank executes its risk strategy and undertakes controlled risk-taking activities within its risk management framework. The Board of Directors (BOD) at MCB Bank Limited actively drive the risk management framework. Under the valuable guidance of BOD, the Bank has a proactive approach in dealing with factors that influence the financial standing of the bank, to generate recurrent earnings and to maximize shareholder's value by achieving an appropriate trade-off between risk and returns. An effective risk management framework along-with a robust risk governance structure, strong capital & liquidity coupled with a good quality of credit portfolio remains a cornerstone of the Bank's risk management goals.

Empowerment and independence are the basic principles in risk management and it is implemented as a fundamental part of BOD's vision. Independence of areas that are responsible for measuring, analyzing, controlling and monitoring risk from the frontline risk takers (i.e. business soliciting groups) is ensured within the Bank. In line with this principle, Group Head-Risk Management functionally reports to the "Risk Management & Portfolio Review Committee" (RM&PRC) which is the sub-committee of the BOD and administratively to the President.

Risk takers and Risk controllers have independent reporting lines, yet work together to increase Bank's value via efficient utilization of capital. Through a four eye principle for credit approval levels for corporate and retail banking, all exposure related requests are approved with the formal consent of at least two authorized individuals including one from the business side having credit approval authority and the other from risk management side having credit review authority. The BOD and its RM&PRC have ensured formulation and implementation of a comprehensive risk management framework. Under the BOD's guidance, the Bank executed an effective risk strategy and continued to undertake controlled risk-taking activities within the risk management framework; combining core policies, procedures and process design with active portfolio management. The risk management framework requires strong integrated risk management practices in key strategic, capital and financial planning processes and day-to-day business processes across the organization, with a goal to ensure that risks are appropriately considered, evaluated and responded to in a timely manner.

As a matter of principle, the Bank constantly endeavors to improve its risk management framework in the light of the international best practices and regulatory guidelines. Accordingly, all policies and procedural documents that form part of the Bank's risk management framework are regularly reviewed to keep them aligned with changing market dynamics, regulatory environment and international standards.

The RM & PRC guides the management on its risk taking activities within the policy framework approved by the BOD. Regular meetings of RM&PRC are convened to oversee the risk exposures and their trends as a result of the various initiatives undertaken by the Bank. The committee reviews different aspects of the loan portfolio which, among others, includes asset growth, credit quality, credit concentration, lending business trend and cross sectional analysis. Review of various aspects of country risk, liquidity risk, market risk covering interest rate risk, foreign exchange risk, equity price risk, technology risk along with the stress-testing is also a regular feature. Operational risk assessments, key risk indicators and major findings of Risk & Control Self-Assessment (RCSA) pertaining to processes, people, systems, technology and reputation are also regularly reviewed by the committee. The committee also reviews in detail the Bank's capital levels under Internal Capital Adequacy Assessment Process (ICAAP) and Capital Adequacy Ratio.

The Management Credit & Risk Committee is the management platform for discussion and deliberation on key risk issues in the portfolio. Regular meetings of the committee are convened to oversee the risk exposures in the portfolio of the Bank.

Credit risk review ensures to minimize credit risk associated at account and portfolio level. During the year 2020, the Bank continued with the policy to remain selective in disbursing its loan to low risk customers across all the industries &



maintains a fairly diversified loan portfolio. Risk Review successfully managed to evaluate and approve increased number of loan requests, within required turnaround time, both for domestic and international operations. An in-house request tracking & turnaround time monitoring software ensures tracking of proposals and monitoring of turnaround-time of credit proposals routed through the Risk Management Group. The Bank's implemented Loan Origination System (LOS) for end to end automation of credit approval process facilitates effective management of internal policies and controls as well as regulatory requirements while also contributing towards its transition to a paperless environment under the Green Banking initiative.

For risk categorized as sovereign/ government risk, the lending exposure is spread over multiple government owned or controlled organizations and departments which are engaged in a variety of tasks that range from different development related works to utility distribution and production. To manage adverse outcomes in terms of unfavorable scenarios, multiple control factors in the lending structure of the Bank provide additional comfort and support. Such controls range from quality of eligible collateral, pre-disbursement safety measures to post disbursement monitoring.

In order to further enhance the credit risk analysis, the bank has in place a probability of default based Internal Credit Risk Rating (ICRR) system which is based on statistical modeling and validation in line with Basel principles. The ICRR is currently focused on corporate and commercial customer categories. Furthermore, another ICRR model is also in place for rating of SE & ME and Agri. customers. A model for facility risk rating has also been implemented which reflects expected loss rate of a credit facility.

In addition to the credit risk, like all financial institutions, MCB is also exposed to market risk through its trading and other investment activities. A comprehensive control structure is in place to ensure that the Bank does not exceed its qualitative and quantitative tolerance for market risk. A number of metrics like VaR methodologies complemented by sensitivity measures, notional limits, and stop loss triggers at portfolio level/asset class and stress testing are used to capture and report the multi-dimensional aspects of market risk.

As an authorized derivatives dealer, the Bank is an active participant in the derivatives market. Overall limits in derivatives are approved by the BOD. Counter party limits structure for derivatives transactions is in place and exposures are monitored and reported on a continuous basis.

Operational Risk is being managed professionally in accordance with the Global Risk Management Policy, Policy on Internal Controls, Operational Risk Management Framework and various regulatory instructions. Operational Risk Inventory database covering losses, control breaches and near miss events is being maintained using professionally developed software. Operational risk events and Key Risk Indicators (KRI's) are captured and management reports are generated. A process of Risk and Control Self-Assessment (RCSA) is in place to assess the operating effectiveness of controls and to implement remedial measures as needed. Updates on operational risk events are presented to the senior management and RM&PRC of the BOD on quarterly basis.

The Bank has developed Information Technology Risk Assessment Framework which enables better management of technology risk managed by IT Risk team. The Bank has an internal operational risk awareness program which is aimed at building capacity and inculcating risk aware culture in the staff through workshops and on-job awareness.

## Capital Structure of the Bank

The Bank remained a well-capitalized institution with a capital base well above the regulatory limits and capital requirements under BASEL frameworks. The Bank continues with a policy of sufficient profit retention to increase its risk absorption capacity. Bank's total Capital Adequacy Ratio is 20.98% against the requirement of 11.50% (including capital conservation buffer of 1.50%). Quality of the capital is evident from Bank's Common Equity Tier-1 (CET1) to total risk weighted assets ratio which comes to 17.03% against the requirement of 6%. The Bank maintained the leverage ratio of 7.03% which is well above the regulatory limit of 3.0%.

## Liquidity Management and Strategy to Overcome Liquidity Position

The Asset Liability Management Committee of the Bank has the responsibility for formulation of overall strategy and oversight of the Asset Liability Management (ALM) function. BOD has approved a comprehensive Liquidity Risk Policy (part of the Global Risk Management Policy), which stipulates policies regarding maintenance of various ratios, funding preferences and evaluation of Banks' liquidity under normal and stress scenarios. The underlying policies and procedures are reviewed and approved regularly at the senior management and BOD levels covering the Global Risk Management

Policy, Global Treasury Policy, Investment Policy and Liquidity Strategy including Contingency Funding Plan.

Bank's comprehensive liquidity management framework assists it to closely watch the liquidity position through monitoring of early warning indicators and stress testing in order to ensure effective and timely decision making. The liquidity risk management approach at the Bank involves intra-day liquidity management, managing funding sources and evaluation of structural imbalances in the statement of financial position. A large and stable customer deposits base, along with a strong capital base provides strength and support for maintenance of a strong liquidity position. The Bank also has a substantial portfolio of marketable securities that can be realized in the event of liquidity stress.

Further, in line with SBP's directives, the Bank has fully implemented BASEL III required liquidity standards and maintains liquidity ratios. The Bank reported Liquidity Coverage Ratio (LCR) of 237.72% and Net Stable Funding Ratio (NSFR) of 174.86% against a requirement of 100%.

### Sensitivity Analysis due to Foreign Currency Fluctuation

The PKR depreciated by around 3.22% against the US Dollar in 2020. Foreign exchange risk exposes the bank to changes in the value of exposure denominated in foreign currencies due to the exchange rate fluctuation and volatility. The types of the instruments exposed to this risk are mainly investments in foreign branches, advances and deposits denominated in foreign currency, cash flows in foreign currencies arising from foreign exchange transactions etc.

The core objective of the foreign exchange risk management is to ensure that the foreign exchange exposure of the Bank remains within defined risk appetite and insulates the Bank against undue losses that may arise due to volatile movements in foreign exchange rates or interest rates.

Limit structure to manage foreign exchange risk including gap limits in different tenors in major currencies are in place to control captioned risk. Bank's net open position and Foreign Exchange Exposure Limits (FEEL) is monitored and reported on intra-day and day end basis. Foreign exchange risk parameters including VaR are generated and monitored on a daily basis. Stress testing of foreign exchange portfolio and its reporting to senior management and RM&PRC of the BOD is also a regular feature.

Impact of 1% change in foreign exchange rates on the Profit and loss account:

| 2020         |              | 2019         |              |
|--------------|--------------|--------------|--------------|
| Banking Book | Trading Book | Banking Book | Trading Book |
| (Rs. 000)    |              |              |              |
| -            | 1,792        | -            | 9,267        |

# Risk and Opportunity Report

At MCB, a comprehensive Risk Management Framework around an approved risk appetite is in place. Mechanisms are defined for every identified risk to ensure that the Bank continuously evaluates the associated risk and ensures presence of operational mitigating controls. The Bank remains committed to exploring every possible opportunity to translate it into revenues / returns for the stakeholders, while making sure that the related risk is adequately managed.

## Risk Governance Model

- Board of Directors (BOD)
- Risk Management & Portfolio Review Committee (RM&PRC)
- Management Credit & Risk Committee (MC&RC)
- Group Head – Risk Management

Graphical presentation of risk governance structure to is as follows:

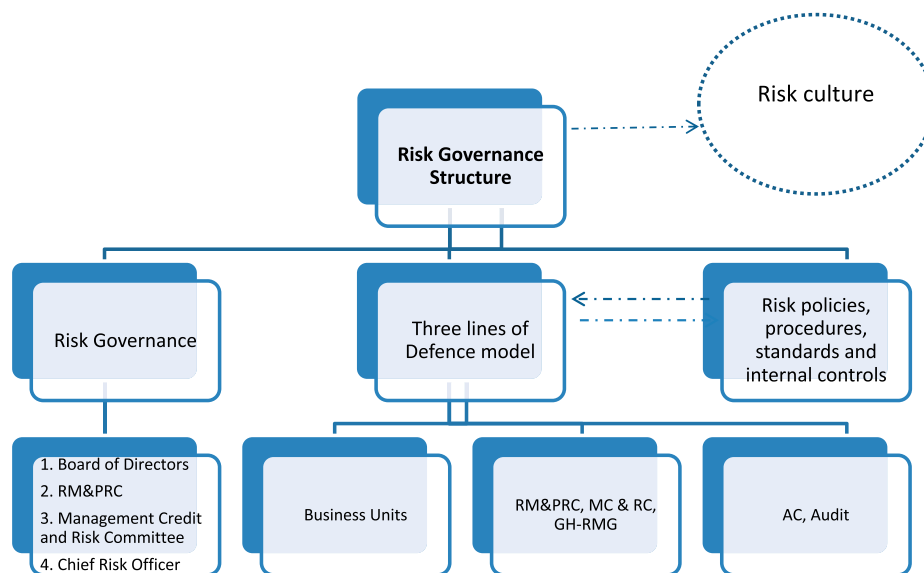

## Three lines of Defence model

The Bank has a well-structured Risk Management model based on three lines of defense which are independent of each other. Each line of defense is executed by different organizational units. The first line of defense consists of business divisions and support units from whose activities the risks arise. RM&PRC being the second line of defense develops frameworks, policies, procedures and establishes risk appetite. Periodical stress testing and continuous monitoring are also an integral part of the second line of defense. The third is the audit and compliance functions which offer an independent oversight.

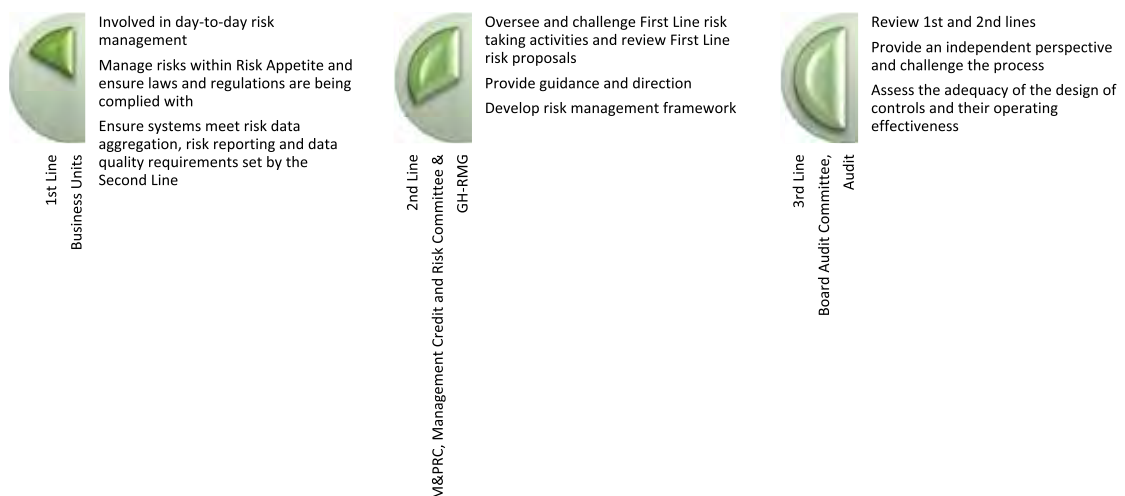

## Assessment of the principal risks facing the Bank by the Boards of Directors:

The BOD's have carried out a robust assessment of the principal risks facing the Bank, including those that would threaten the business model, future performance, solvency or liquidity.

Bank has identified the following risks after analyzing the external and internal factors:

| Factors                    | Source             | Risks                                                                                                                                                                                                                                                                                                                                                                                                                                                                                                                                                                                                                                                                                                                                                                           |
|----------------------------|--------------------|---------------------------------------------------------------------------------------------------------------------------------------------------------------------------------------------------------------------------------------------------------------------------------------------------------------------------------------------------------------------------------------------------------------------------------------------------------------------------------------------------------------------------------------------------------------------------------------------------------------------------------------------------------------------------------------------------------------------------------------------------------------------------------|
| <b>Economic</b>            | External           | <b>Market risks:</b> The risk of loss arising from potential adverse changes in the value of the Bank's assets and liabilities from fluctuation in market variables including, but not limited to, interest rates, foreign exchange, equity prices, commodity prices, credit spreads, implied volatilities and asset correlations.                                                                                                                                                                                                                                                                                                                                                                                                                                              |
|                            | External           | <b>Market risks:</b> The risk of loss arising from potential adverse changes in the value of the Bank's assets and liabilities from fluctuation in market variables including, but not limited to, interest rates, foreign exchange, equity prices, commodity prices, credit spreads, implied volatilities and asset correlations.                                                                                                                                                                                                                                                                                                                                                                                                                                              |
|                            | External           | <b>Credit risk:</b> The risk of loss to the bank from the failure of clients, customers or counterparties, including sovereigns, to fully honour their obligations, including the whole and timely payment of principal, interest, collateral and other receivables.                                                                                                                                                                                                                                                                                                                                                                                                                                                                                                            |
|                            | External/Internal  | <b>Liquidity risk:</b> The risk that the bank is unable to meet its contractual or contingent obligations or that it does not have the appropriate amount, tenor and composition of funding and liquidity to support its assets.                                                                                                                                                                                                                                                                                                                                                                                                                                                                                                                                                |
| <b>Technology/ Systems</b> | Internal/ External | <p><b>Technological /Information Security Risk:</b></p> <p>Technology risks having potential impact due to technology disruption or failure to disrupt bank's business process posing adverse impact on Confidentiality, Integrity and Availability of MCB's technology environment.</p> <p>Information Technology Risk Assessment helps the management to identify and manage the key risks, potential threats and associated vulnerabilities to the critical primary &amp; secondary IT systems and applications of the Bank.</p> <p><b>Operational Risk</b></p> <p>The risk of loss to the Bank from inadequate or failed processes or systems, human factors or due to internal/external events (e.g. fraud) where the root cause is not due to credit or market risks.</p> |
| <b>Political</b>           | External           | <b>Country risk:</b> Political stability and controlled law & order situation is a pre-requisite for any economic development and reposes investor confidence in the country, providing corporates a potential investment opportunity. However, political instability can negatively impact the economy /equity market, thus resulting in decreased profitability.                                                                                                                                                                                                                                                                                                                                                                                                              |
| <b>Regulator</b>           | Internal/External  | <p><b>Regulatory Risk:</b> The risk of loss or imposition of penalties, damages or fines from the failure of the firm to meet its legal obligations including regulatory or contractual requirements.</p> <p>Key sources of uncertainty include expected regulatory requirements specifically implementation of IFRS 9 in Pakistan, which may have negative impact on the bottom line of the banks.</p>                                                                                                                                                                                                                                                                                                                                                                         |
| <b>Social</b>              | Internal/External  | <b>Reputation risk:</b> The risk that an action, transaction, investment or event will reduce trust in the Bank's integrity and competence by clients, counterparties, investors, regulators, employees or the public.                                                                                                                                                                                                                                                                                                                                                                                                                                                                                                                                                          |

## Materiality Approach

Matters are considered to be material if, individually or in aggregate, they are expected to significantly affect the reputation, performance and profitability of the Bank. The materiality process helps to navigate the complex landscape of stakeholder expectations, risks and opportunities. The BOD of the Bank has approved Materiality Policy for the Bank.

Summarized risks, opportunities and related mitigating factors are documented below:-

| Risk type                    | Materiality Rating | Probability of Risk Occurrence | Strategy                                                                                                                                                                                                                                                                                                                                                                                                                                                                                                                                                                                                                                                                                                                                                                                                                                                                                                                                                                                                                                                                                                                                                                                                                                                                                                                                                                                                                                                                                                                                                                                                                                                                                                                                                                                                                                                                                                                                                                                                                      | Impacted CAPITAL |
|------------------------------|--------------------|--------------------------------|-------------------------------------------------------------------------------------------------------------------------------------------------------------------------------------------------------------------------------------------------------------------------------------------------------------------------------------------------------------------------------------------------------------------------------------------------------------------------------------------------------------------------------------------------------------------------------------------------------------------------------------------------------------------------------------------------------------------------------------------------------------------------------------------------------------------------------------------------------------------------------------------------------------------------------------------------------------------------------------------------------------------------------------------------------------------------------------------------------------------------------------------------------------------------------------------------------------------------------------------------------------------------------------------------------------------------------------------------------------------------------------------------------------------------------------------------------------------------------------------------------------------------------------------------------------------------------------------------------------------------------------------------------------------------------------------------------------------------------------------------------------------------------------------------------------------------------------------------------------------------------------------------------------------------------------------------------------------------------------------------------------------------------|------------------|
| <b>Market Risk</b>           | High               | Medium probability             | <p><b>Measurement:</b> Bank is exposed to market risk through its trading and other investment activities. Metrics like VaR methodologies complemented by sensitivity measures, notional limits, loss triggers at a detailed portfolio level and stress testing are used to capture and report the multi-dimensional aspects of market risk.</p> <p><b>Monitoring:</b> A comprehensive structure, ensuring the bank does not exceed its qualitative and quantitative tolerance for market risk, is in place.</p> <p><b>Management:</b> The bank has followed a conservative and balanced approach towards risk taking in the market risk area. The robust risk management architecture ensures that the exposures remain within the defined risk appetite.</p> <p>Furthermore, a comprehensive control structure is in place to ensure that the Bank does not exceed its qualitative and quantitative tolerance for market risk. A number of metrics like VaR methodologies complemented by sensitivity measures, notional limits, stop loss triggers at portfolio level/asset class, and stress testing are used to capture and report the multi-dimensional aspects of market risk.</p>                                                                                                                                                                                                                                                                                                                                                                                                                                                                                                                                                                                                                                                                                                                                                                                                                                     | Financial        |
| <b>Capital Adequacy Risk</b> | High               | Medium probability             | <p><b>Measurement:</b> The Bank is a well-capitalized institution with a capital base well above the regulatory limits and Basel-III requirements.</p> <p><b>Monitoring:</b> The Bank regularly assesses the capital requirements and ensures that the minimum capital requirements specified by the State Bank are adhered to. Internal Capital Adequacy Assessment is a regular activity. Stress levels of major risks are assessed against the minimum capital requirement.</p> <p>Regular assessment of capital enables an evaluation of the amount, type and distribution of capital required to cover these risks.</p> <p><b>Management:</b> The Bank remained a well-capitalized institution with a capital base well above the regulatory limits and capital requirements under BASEL frameworks. The Bank continues with a policy of sufficient profit retention to increase its risk absorption capacity. Bank's total Capital Adequacy Ratio is 20.98% against the requirement of 11.50% (including capital conservation buffer of 1.50%). Quality of the capital is evident from Bank's Common Equity Tier-1 (CET1) to total risk weighted assets ratio which comes to 17.03% against the requirement of 6%. The bank maintained a leverage ratio of 7.03% which is well above the regulatory limit of 3.0%.</p> <p>Going-concern capital requirements are assessed on a forward-looking basis – including as part of the annual budgeting process. These assessments consider the resilience of capital adequacy and leverage ratios under a range of hypothetical future states. The assessments incorporate assumptions regarding a range of regulatory and accounting aspects, such as IFRS 9, taking account of a number of factors including economic variables and impairments.</p> <p>The Bank will continue the policy of sufficient profit retention to increase its risk taking capacity and capitalize opportunities to protect the interests of stakeholders in the short, medium and long term.</p> | Financial        |

| Risk type   | Materiality Rating | Probability of Risk Occurrence | Strategy                                                                                                                                                                                                                                                                                                                                                                                                                                                                                                                                                                                                                                                                                                                                                                                                                                                                                                                                                                                                                                                                                                                                                                                                                                                                                                                                                                                                                                                                                                                                                                                                                                                                                                                                                                                                                                                                                                                                                                                                                                                                                                                                                                                                                                                                                                                                                                                                                                                                                                                                                                                                                                                                                                                                                                                                                                                                                                                                                                                                                                                                                                                                                                                                                                          | Impacted CAPITAL |
|-------------|--------------------|--------------------------------|---------------------------------------------------------------------------------------------------------------------------------------------------------------------------------------------------------------------------------------------------------------------------------------------------------------------------------------------------------------------------------------------------------------------------------------------------------------------------------------------------------------------------------------------------------------------------------------------------------------------------------------------------------------------------------------------------------------------------------------------------------------------------------------------------------------------------------------------------------------------------------------------------------------------------------------------------------------------------------------------------------------------------------------------------------------------------------------------------------------------------------------------------------------------------------------------------------------------------------------------------------------------------------------------------------------------------------------------------------------------------------------------------------------------------------------------------------------------------------------------------------------------------------------------------------------------------------------------------------------------------------------------------------------------------------------------------------------------------------------------------------------------------------------------------------------------------------------------------------------------------------------------------------------------------------------------------------------------------------------------------------------------------------------------------------------------------------------------------------------------------------------------------------------------------------------------------------------------------------------------------------------------------------------------------------------------------------------------------------------------------------------------------------------------------------------------------------------------------------------------------------------------------------------------------------------------------------------------------------------------------------------------------------------------------------------------------------------------------------------------------------------------------------------------------------------------------------------------------------------------------------------------------------------------------------------------------------------------------------------------------------------------------------------------------------------------------------------------------------------------------------------------------------------------------------------------------------------------------------------------------|------------------|
| Credit Risk | High               | Medium probability             | <p><b>Measurement:</b> Credit Risk Management function identifies, measures, manages, monitors and mitigates credit risk. Credit Risk is measured and estimated through detailed financial and non-financial analyses, internal and external credit risk ratings and customers' behavior analysis. Stress testing of top customers in credit portfolio is also carried out regularly.</p> <p><b>Monitoring:</b> Credit Risk Management organizational structure ensures pre and post-facto management of credit risk. Credit Review function carries out pre-fact evaluation of counterparties &amp; the credit structures and hindsight reviews, the Credit Risk Control (CRC) function performs post-fact monitoring including security documentation and limits monitoring. Business side continuously keeps in touch with customers to have updated information about the clients.</p> <p><b>Management:</b> Bank has been selective in taking exposure on good quality borrowers across all industry segments. Multiple factors in bank's lending structure provide additional comfort and support in mitigating credit risk. These include quality of eligible collateral, pre-disbursement safety measures, post disbursement monitoring, etc. Bank has a fairly diversified loan portfolio. For risk categorized as sovereign/ government risk, MCB's lending exposure is spread over multiple government owned or controlled organizations and departments which are engaged in a variety of tasks that ranges from different development related works to utility distribution and production.</p> <p>Credit Risk Review ensures to minimize credit risk associated at account and portfolio level. During the year, the Bank continued with the policy to remain selective in disbursing its loan to low risk customers across all the industries &amp; maintains a fairly diversified loan portfolio. Risk Review successfully managed to evaluate and approve increased number of loan requests, within required turnaround time, both for domestic and international operations. An in-house request tracking &amp; turnaround time monitoring software ensures tracking of proposals and monitoring of turnaround-time of credit proposals routed through Risk Management Group. Bank's implemented Loan Origination System (LOS) for end to end automation of credit approval process facilitated effective management of Bank's internal policies &amp; controls as well as regulatory requirements. LOS has also contributed towards Bank's transition to paperless environment under the Green Banking initiative.</p> <p>For risk categorized as sovereign/ government risk, the lending exposure is spread over multiple government owned or controlled organizations and departments which are engaged in a variety of tasks that range from different development related works to utility distribution and production. To manage adverse outcomes in terms of unfavorable scenarios, multiple control factors in the lending structure of the Bank provide additional comfort and support. Such controls range from quality of eligible collateral, pre-disbursement safety measures to post disbursement monitoring.</p> | Financial        |

| Risk type      | Materiality Rating | Probability of Risk Occurrence | Strategy                                                                                                                                                                                                                                                                                                                                                                                                                                                                                                                                                                                                                                                                                                                                                                                                                                                                                                                                                                                                                                                                                                                                                                                                                                                                                                                                                                                                                                                                                                                                                                                                                                                                                                                                                                                                                                                                                                                                                                                                                                                                                                                                          | Impacted CAPITAL |
|----------------|--------------------|--------------------------------|---------------------------------------------------------------------------------------------------------------------------------------------------------------------------------------------------------------------------------------------------------------------------------------------------------------------------------------------------------------------------------------------------------------------------------------------------------------------------------------------------------------------------------------------------------------------------------------------------------------------------------------------------------------------------------------------------------------------------------------------------------------------------------------------------------------------------------------------------------------------------------------------------------------------------------------------------------------------------------------------------------------------------------------------------------------------------------------------------------------------------------------------------------------------------------------------------------------------------------------------------------------------------------------------------------------------------------------------------------------------------------------------------------------------------------------------------------------------------------------------------------------------------------------------------------------------------------------------------------------------------------------------------------------------------------------------------------------------------------------------------------------------------------------------------------------------------------------------------------------------------------------------------------------------------------------------------------------------------------------------------------------------------------------------------------------------------------------------------------------------------------------------------|------------------|
| Credit Risk    | High               | Medium probability             | <p>Through a four eye principle for credit approval levels for corporate and retail banking, all such exposure related requests are approved with the formal consent of at least two authorized individuals including one from business side having credit approval authority and other from risk management side having credit review authority.</p> <p>The MC&amp; RC is the management platform for discussion and deliberation on key risk issues in the portfolio. Regular meetings of the committee are convened to oversee the risk exposures in the portfolio of the Bank.</p> <p>In order to further enhance the credit risk analysis the Bank has in place a probability of default based Internal Credit Risk Rating (ICRR) system which is based on statistical modeling and validation in line with Basel principles. The ICRR is currently focused on corporate and commercial customer categories. Furthermore; another Internal Credit Risk Rating Model is also in place for rating of SE &amp; ME and Agri Customers. A model for Facility Risk Rating has also been implemented which would reflect expected loss rate of a credit facility.</p>                                                                                                                                                                                                                                                                                                                                                                                                                                                                                                                                                                                                                                                                                                                                                                                                                                                                                                                                                                               | Financial        |
| Liquidity Risk | High               | Medium to Low probability      | <p><b>Measurement:</b> MCB regularly performs Liquidity Risk Analysis and liquidity stress tests as part of its liquidity monitoring activities. The purpose of the liquidity risk assessments and stress tests is intended to ensure sufficient liquidity for the Bank under both idiosyncratic and systemic market stress conditions.</p> <p><b>Monitoring:</b> Liquidity positions are regularly monitored through established early warning Indicators and liquidity risk analysis. Liquidity Coverage Ratio and Net Stable Funding Ratios are monitored regularly.</p> <p><b>Management:</b> MCB's Liquidity Risk Management approach involves intraday liquidity management, managing funding sources and evaluation of structural imbalances in balance sheet structure.</p> <p>The Bank's large and stable base of customer deposits, along with Bank's strong capital base, indicates strong liquidity position. Bank also has a substantial portfolio of marketable securities that can be realized in the event of liquidity stress. Bank's Liquidity Coverage Ratio (LCR) and Net Stable Funding Ratio (NSFR) are well over and above the regulatory requirement.</p> <p>The Asset Liability Management Committee of the bank has the responsibility for the formulation of overall strategy and oversight of the Asset Liability Management (ALM) function. BOD has approved a comprehensive Liquidity Risk Policy (part of Global Risk Management Policy), which stipulates policies regarding maintenance of various ratios, funding preferences, and evaluation of Banks' liquidity under normal and stress scenarios. Underlying policies and procedures are reviewed and approved regularly at the senior management and BOD Levels including Global Risk Management Policy, Global Treasury Policy, Investment Policy and Liquidity Strategy.</p> <p>Further, in line with SBP's directives, Bank has fully implemented BASEL III required liquidity standards and maintains liquidity ratios including LCR and NSFR with a considerable cushion over and above the regulatory requirement to mitigate any liquidity risk.</p> | Financial        |

| Risk type                                       | Materiality Rating | Probability of Risk Occurrence | Strategy                                                                                                                                                                                                                                                                                                                                                                                                                                                                                                                                                                                                                                                                                                                                                                                       | Impacted CAPITAL                                       |
|-------------------------------------------------|--------------------|--------------------------------|------------------------------------------------------------------------------------------------------------------------------------------------------------------------------------------------------------------------------------------------------------------------------------------------------------------------------------------------------------------------------------------------------------------------------------------------------------------------------------------------------------------------------------------------------------------------------------------------------------------------------------------------------------------------------------------------------------------------------------------------------------------------------------------------|--------------------------------------------------------|
| <b>Technological/ Information Security Risk</b> | High               | Low probability                | <p><b>Monitoring &amp; Management:</b> Through technology risk monitoring process, bank tracks and evaluates the levels of technology and security risk as well as monitoring the risk itself. The findings produced by risk monitoring processes are used to create new risk mitigation and monitoring strategies considering the regulatory compliance in-line with the best practices.</p> <p>The Bank has developed Information Technology Risk Assessment Framework which enables better management of technology risk properly. The Information Security Risk Division is headed by a Chief Information Security Officer (CISO) reporting to the Group Head Risk Management.</p>                                                                                                         | Financial, Intellectual                                |
| <b>Country Risk</b>                             | Low                | Medium to low probability      | <p><b>Measurement:</b> Bank's Country Risk exposure is assessed against bank's cross border trade and treasury activities.</p> <p><b>Monitoring &amp; Management:</b> Monitoring of risk exposure is a regular activity. Country exposure limits both for trade and treasury exposures are in place, which broadly capture direct exposure on sovereigns and foreign domiciled counterparties.</p>                                                                                                                                                                                                                                                                                                                                                                                             | Financial                                              |
| <b>Operational Risk</b>                         | Medium             | Medium to low probability      | <p><b>Measurement:</b> A database covering losses, control breaches, near misses &amp; KRIs is being maintained. Operational Effectiveness of controls is assessed using the Risk &amp; Control Self-Assessment (RCSA) process.</p> <p><b>Monitoring:</b> Monthly/Quarterly updates on operational risk events are presented to senior management, MC&amp;RC and the RM&amp;PRC of the Board.</p> <p><b>Management:</b> The bank has an internal Operational Risk awareness program which is aimed at building capacity and inculcating risk culture in the staff through workshops and on-job awareness. Banks' capacity to capture &amp; report operational risk events and KRIs is further enhanced by implementing more professionally developed Operational Risk Management Software.</p> | Financial, Intellectual                                |
| <b>Regulatory Risk</b>                          | Medium             | Medium probability             | <p><b>Measurement:</b> Management of regulatory risk entails early identification and effective management of changes in legislative and regulatory requirements that may affect the Bank.</p> <p><b>Monitoring &amp; Management:</b> The Bank reviews key regulatory developments in order to anticipate changes and their potential impact on its performance.</p> <p>Bank endeavors to maintain healthy relationships with regulators and continued compliance with regulatory requirements.</p>                                                                                                                                                                                                                                                                                            | Financial, Intellectual                                |
| <b>Reputation risk</b>                          | Medium             | Medium probability             | <p><b>Monitoring &amp; Management:</b> Reputational risk is managed on an ongoing basis through a policy framework that details expected behavior of the business and employees. It guides us on the monitoring of employee behavior and specific client responses as well as to society in general. This includes precise and transparent reporting through our integrated annual report, annual financial statements and through other public statements. Our risk mitigation strategy includes:</p> <ul style="list-style-type: none"> <li>• a centralized policy on media;</li> <li>• an escalation process for complaints; and</li> <li>• clear relationships with stakeholders</li> </ul>                                                                                                | Financial, Intellectual, Social & Relationship Capital |



**Information about defaults in payment of any debts and reason thereof**

There is no default by the Bank in payments of any debts during the year.

**Inadequacy in the Capital structure and plans to address such inadequacy**

The Bank is not presently facing any kind of inadequacy in capital structure.

**Opportunities:**

| Source   | Opportunity                                                                                                                                                                         | Strategy to Materialize                                                                                                                                                                                                                                                                                         | Impacted CAPITAL                                         |
|----------|-------------------------------------------------------------------------------------------------------------------------------------------------------------------------------------|-----------------------------------------------------------------------------------------------------------------------------------------------------------------------------------------------------------------------------------------------------------------------------------------------------------------|----------------------------------------------------------|
| External | Building strategic national/international alliances to contribute towards China Pakistan Economic Corridor (CPEC) execution.                                                        | Re-aligning the business model through segmentation and expansion of branch network.                                                                                                                                                                                                                            | Financial, Manufactured, Human, Intellectual             |
| Internal | Strong capital base and high Capital Adequacy Ratio provides the opportunity of exploring International avenues in emerging/developed markets to expand Bank's network.             | Explore new markets after performing the feasibility studies.                                                                                                                                                                                                                                                   | Manufactured, Intellectual                               |
| Internal | Developing and launching new deposit products to align & strengthen the existing product menu and to capitalize on the growing branchless and mobile/digital Banking opportunities. | Increase focus on digitalization and automation of process.<br><br>Introduce new products considering the needs of different segments of the population.                                                                                                                                                        | Financial, Manufactured, Human, Intellectual             |
| Internal | Increasing Bank's advances portfolio with enhanced focus on agriculture, SME and other segments.                                                                                    | Widening the scope of branch network in potential / untapped areas.<br><br>Align product expertise with client domicile.<br><br>Streamline and simplify processes for quick disbursement of advances                                                                                                            | Manufactured, Human, Intellectual                        |
| External | Facilitating non-resident Pakistanis to increase the flow of home remittances.                                                                                                      | Entering into new contracts with foreign agents.<br><br>Placement of Bank representatives overseas and increase marketing activities.<br><br>Explore new markets to increase customer base.                                                                                                                     | Manufactured, Human, Intellectual                        |
| External | Adoption of emerging technologies in rendering of premier digital financial services to the customers and playing a positive role in expanding the domestic technology ecosystem.   | Forging strategic partnerships with leading technological platforms and strengthening banking relationships with financially capable enterprises proposing competitive solutions.<br><br>Enhancing e-banking proposition for attracting and retaining the technically proficient "millennial" customer segment. | Manufactured, Human, Intellectual, Social & Relationship |

# Directors' Report

We are pleased to present, on behalf of the Board of Directors, the annual report of MCB Bank Limited (MCB) for the year ended December 31, 2020.

## Economy Review

### Global Economy:

The year in review was dominated by an unprecedented global health crisis, during which the COVID-19 pandemic battered the world's economy and forced the governments and the central banks across the globe to take drastic fiscal and monetary easing measures. In the United States, the Federal Reserve brought down its policy rate to 0-0.25%, reducing it by a cumulative 150 basis points to support the tempering economic momentum and inflation. Taking the lead from US Federal Reserve, major emerging market central banks slashed their interest rates in an effort to shore up their economies. On the fiscal front, the U.S government signed the largest federal stimulus package, worth USD 2.3 trillion, to help cope with the economic downturn inflicted by the pandemic.

In the UK, the Bank of England similarly reduced its interest rate to 0.1% from 0.75% and expanded its bond purchasing program to combat the impact of the coronavirus pandemic on the economy. On the Brexit front, UK and EU reached a landmark trade deal after 11 months of negotiations and just a week before a year-end deadline. Although the agreement still leaves critical details that need to be worked out, the latest events have eliminated most of the uncertainty surrounding the exit of UK from the European Union.

Meanwhile, the Greater Europe, in addition to its already existing quantitative easing program entailing 20 billion euros of net asset purchases per month, introduced its pandemic emergency purchase program (PEPP) to support the ailing economy.

While far from over, there was some respite, as towards the end of the year, the announcement of Coronavirus vaccines by Pfizer, Moderna, and AstraZeneca brought some hope and helped lift the market sentiment. All bets are now placed on the efficacy of the governments to administer the rollout of COVID-19 vaccines in 2021.

### Domestic Economy:

Pakistan started the year on a positive note as the tough economic measures taken by the government since the commencement of its tenure in 2018 started bearing fruit. However, during the year 2020, just like the rest of the world, Pakistan's economy was hit hard by the COVID-19 pandemic which forced the government and the central bank to take drastic policy measures.

On the fiscal side, the government announced a relief package worth PKR 1.2 trillion, which led to an increase in the government expenditure. Consequently, the fiscal deficit which was initially projected to be 7.1% of GDP for FY20 clocked-in at 8.1%. However, the situation improved slightly during the second half of CY20 as the revenue growth picked up after the lifting of lockdown. During July-December 2020, Pakistan recorded a fiscal deficit of PKR 1,137 billion (2.5% of GDP).

Meanwhile, Headline Inflation (Base Year 2015-2016) eased after the first quarter of 2020 as the demand declined due to the introduction of COVID-19 lockdown by the government. Low base impact also came into play which further put downward pressure on the inflation reading. On average, NCPI clocked-in at 9.53% in 2020. To support the ailing economy and to stimulate growth, SBP decreased its policy rate from 13.25% to 7.00%, recording a cumulative decline of 625 basis points during the year.

On the external front, Pakistan was able to mitigate the pressure due to the inflows received from multilateral sources, including International Monetary Fund (IMF), World Bank (WB), Asian Development Bank (ADB) and Asian Infrastructure Investment Bank (AIIB), during the year. Another development that lent support to the economy under these unprecedented times was the debt relief initiative taken by the G-20 countries.

Moving on to the current account, Pakistan's exports took a larger hit as compared to the imports and declined by 11.57% during CY20 as compared to the last year. Imports declined by merely 6.48% despite a significant drop in international oil prices. Remittance during CY20 increased to USD 26 billion from USD 22 billion in CY19 (+17% on a YoY basis). Current account recorded a surplus during CY20 due to a significant jump in remittances.

As a result of improved current account balance, PKR depreciated moderately by 3.22% against the dollar during CY20 and closed the calendar year at 159.83 after touching a high of 168.44 in August, 2020. The KSE-100 index witnessed a V-shaped recovery, corrected itself from its low of 27,047 in March to end the year at 43,755.

## Profit and Appropriation

The profit before and after taxation for the year ended December 31, 2020 together with appropriations is as under:

|                                                                                                                                       | Rs. in Million |
|---------------------------------------------------------------------------------------------------------------------------------------|----------------|
| <b>Profit before taxation</b>                                                                                                         | <b>48,249</b>  |
| Taxation                                                                                                                              | 19,212         |
| <b>Profit after taxation</b>                                                                                                          | <b>29,037</b>  |
| Un-appropriated profit brought forward                                                                                                | 55,777         |
| Other comprehensive income - net of tax                                                                                               | (342)          |
| Surplus realized on disposal of revalued fixed assets - net of tax                                                                    | 23             |
| Surplus realized on disposal of non-banking assets - net of tax                                                                       | 5              |
| Transferred in respect of incremental depreciation from surplus on revaluation of fixed assets to un-appropriated profit - net of tax | 89             |
|                                                                                                                                       | <b>55,552</b>  |
| <b>Profit available for appropriation</b>                                                                                             | <b>84,589</b>  |
| <b>Appropriations:</b>                                                                                                                |                |
| Statutory reserve                                                                                                                     | 2,904          |
| Final cash dividend at Rs. 5.0 per share - December 31, 2019                                                                          | 5,925          |
| Interim cash dividend at Rs. 5.0 per share - March 31, 2020                                                                           | 5,925          |
| <b>Total appropriations</b>                                                                                                           | <b>14,754</b>  |
| <b>Un-appropriated profit carried forward</b>                                                                                         | <b>69,835</b>  |
| Earnings Per Share (Rs)                                                                                                               | 24.50          |

## Dividends

The Board of Directors declared a final cash dividend of Rs. 15 per share for the year ended December 31, 2020, which is in addition to the Rs. 5 per share of interim dividend already paid to the shareholders for the quarter ended March 31, 2020, taking the dividend payout ratio to 81.63%. In compliance with SBP's instructions, Bank did not declare dividend for the second and third quarters. The effect of the recommendation is not reflected in the above appropriations.

## COVID-19 Pandemic

Enhanced regulatory framework, increased competition from digital entrants and rising operating costs for the brick and mortar branch model had pushed the traditional banking architecture in Pakistan to look for avenues that harbor the potential for inducing wide-ranging resilience, efficiency and acceptability.

Emergence of COVID-19, during the year, further challenged the existing banking landscape and paved way for the industry to adopt emerging technologies in rendering digital financial services amidst responsibly enforced social distancing and containment measures. A

swift and coordinated response from the monetary, fiscal and regulatory authorities diluted the impact of emanating downside risks and remained a key determinant in addressing the consequences of COVID-19 outbreak.

MCB undertook various timely measures, by invoking Business Continuity Plan, for the protection of its customers and employees; hence mitigating the risk of spreading COVID-19 outbreak and concurrently playing a pivotal role in supporting Governments' key pandemic responses for credit extension and provision of essential banking services to the general public.

Under the evolving operating and macro-economic scenario, Bank's sustained focus on developing a robust risk management platform, inculcating operational efficiencies, offering bespoke customer services and continuous enrichment of its technology based products laid the foundation for another year of significant financial growth.

## Performance Review

With strong build up in core earnings, MCB's Profit After Tax (PAT) for the year ended December 31, 2020, posted a growth of 21% to reach Rs. 29.04 billion; translating into an Earning Per Share (EPS) of Rs. 24.5 against an EPS of Rs. 20.23 posted last year 2019.

Sizeable growth in current deposits, timely shift in maturity profiling of investments and favorable re-pricing lag enabled the Bank to increase its net interest income by 20% to Rs. 71.3 billion.

Fee income for the year 2020 was reported less by 3% over last year, primarily due to lower transaction volumes and business activities induced by the lockdowns. However, with their lifting, fee income is normalizing. Amidst evolving yield curve expectations, proactive duration management of the investments portfolio resulted in capital gains of Rs. 3.3 billion during the year under review. Hence, the total non-markup income posted growth of 9% to reach Rs. 18.14 billion.

On the operating expenses side (excluding pension fund reversal), despite sustained inflationary pressures, expansion in branch outreach and continued investment in technological infrastructure together with regular performance and merit adjustments for the Human Capital, the Bank's strategic focus of balancing short term tactical cost reductions with long term cost initiatives has assisted in containing growth in administrative expenses; in turn registering a decline of Rs. 129 million during the year 2020. Thus the cost to income ratio of the Bank significantly improved to 36.87% from 43.4% reported last year.

In anticipation that portfolios affected by the pandemic might require provisioning once SBP's relaxations and waivers expire in 2021, the management has exercised prudence and booked a general provision of Rs. 4.0 billion during the year under review, hence providing insulation and loss absorption capacity against any risks to asset quality.

On the financial position side, the total asset base of the Bank on an unconsolidated basis was reported at Rs. 1.76 trillion depicting an increase of 16% over December 2019. Analysis of the asset mix highlights that net investments increased by Rs. 267 billion (36%) whereas due to subdued domestic demand gross advances decreased by Rs. 26.5 billion (-5%) over December 2019. However, gross advances increased by Rs 19.9 billion in last quarter of 2020.

The Non-performing loan (NPLs) base of the Bank recorded an increase of Rs. 1.77 billion and was reported at Rs. 51.19 billion. The increase was primarily on account of subjective classification by the Bank on prudent basis. The Bank has not taken FSV benefit in calculation of specific provision and has increased its un-encumbered general provision reserve to Rs. 4.57 billion. The coverage and infection ratios of the Bank were reported at 98.87% and 9.97% respectively.

On the liabilities side, the deposit base of the Bank registered an unprecedented increase of Rs. 144.74 billion (+13%) over December 2019, with 15% growth contributed by current accounts, improving the current account mix to 38% and CASA ratio to 92.96%.

Return on Assets and Return on Equity was reported at 1.77% and 18.88% respectively, whereas book value per share was reported at Rs. 137.02.

While complying with the regulatory capital requirements, the Bank's total Capital Adequacy Ratio (CAR) is 20.98% against the requirement of 11.50% (including capital conservation buffer of 1.50% as reduced under the BPRD Circular Letter No. 12 of 2020). Quality of the capital is evident from Bank's Common Equity Tier-1 (CET1) to total risk weighted assets ratio which comes to 17.03% against the requirement of 6.00%. Bank's capitalization also resulted in a Leverage Ratio of 7.03% which is well above the regulatory limit of 3.0%. The Bank reported Liquidity Coverage Ratio (LCR) of 237.72% and Net Stable Funding Ratio (NSFR) of 174.86% against requirement of 100%.

MCB has been declared the Overall Most Outstanding Company in Pakistan - 2020 and Most Outstanding Company – Financials Sector in Pakistan - 2020 by Asiamoney, an associate of Euromoney. The Annual

report of MCB Bank has also been adjudged 1st by ICAP/ICMAP in the financial sector category. MCB has won this award 10 times in last 11 years with 8 consecutive wins.

### Future Outlook

Despite the timely measures taken by the government to curtail the spread of the Novel Coronavirus and to support the economy, 2021 is expected to prove challenging for Pakistan. The main challenge that the government currently faces is to stimulate growth without significantly increasing the inflationary pressures in the economy.

Moreover, all eyes are currently focused on the re-initiation of the IMF Program which was stalled when the Covid-19 pandemic hit the country. The IMF Program bodes well for international confidence in Pakistan and adds to the government's capability to tap international markets. In addition, it also holds significance on account of the follow through impact it has on fiscal management, especially through the elimination of subsidies and inefficiencies. Hence, any positive outcome of the negotiations with IMF will lead to the betterment of the economy.

The banking sector outlook remains engulfed in multifarious challenges emanating from the current economic downturn amidst expectations of a modest 1.5% GDP growth in FY21, Fintech disruptions, escalating regulatory compliance, emerging cyber security threats, lowering margins and rising risks to asset quality given the challenging operating environment.

Amidst the challenges, MCB remains well poised to capitalize on its stable deposit based funding structure, ample liquidity buffers, wide branch outreach and a multi-pronged strategy governing continuous augmentation of Bank's robust risk management platform and adoption of cutting edge technologies for achieving broad based digitization and posting stable financial growth.

### Risk Management Framework

The risk management framework has been separately disclosed in the Annual Report.

### Credit Rating

The Bank enjoys highest local credit ratings of AAA / A1+ categories for long term and short term respectively, based on PACRA notification dated June 26, 2020.

### Statement on Internal Control

The Board is pleased to endorse the statement made by management relating to Internal Control over Financial Reporting (ICFR) and overall internal controls. The Management's Statement on Internal Controls is included in the Annual Report.

Statement under Code of Corporate Governance and section 227 of Companies Act 2017:

The Board of Directors is committed to ensure that the requirements of Corporate Governance set by the Securities and Exchange Commission of Pakistan and requirements of Section 227 of Companies Act 2017 are fully met. The Bank has adopted good corporate governance practices and the Directors are pleased to report that:

- The financial statements, prepared by the management of the Bank, present a fair state of its affairs, result of its operations, cash flows and changes in equity.
- Proper books of account of the Bank have been maintained.
- Appropriate accounting policies have been consistently applied in preparation of financial statements. Accounting estimates are based on reasonable and prudent judgment.
- International Financial Reporting Standards, as applicable in Pakistan, have been followed in preparation of the financial statements and any departure there from has been adequately disclosed and explained in the Annual Accounts.
- There has been no material departure from the best practices of corporate governance.
- There are no significant doubts upon the Bank's ability to continue as a going concern.
- Profit amounting to Rs. 2.9 billion has been transferred to the Statutory Reserve for the year 2020.
- The System of Internal Control is sound in design and has been effectively implemented and monitored.
- Key operating and financial data of the last six years is presented in the relevant section of this Annual Report.
- Pattern of Shareholding, complying with the requirements prescribed by the code is annexed with this Annual Report.
- Statement of Compliance with Code of Corporate Governance is included in the Annual Report.
- Composition of the Board is given in the Statement of Compliance with the Code of Corporate Governance in the corporate governance section of this Annual Report.
- Names of the persons who, at any time during the year 2020, were directors of the Bank have been separately disclosed in the corporate governance section of this Annual Report.
- The Committees of Board of Directors along with their terms of reference/charter have been separately disclosed in the corporate governance section of this Annual Report.
- The number of Board and committees' meetings held during the year and attendance by each Director has been separately disclosed in the corporate

governance section of this Annual Report.

- Details of directors' training programs are given in the statement of compliance with the code of corporate governance.
- The remuneration policy of non-executive directors, including independent directors, as approved by the Shareholders of the Bank is disclosed in the corporate governance section of this annual report.
- Detail of remuneration of Chairman, President/CEO and non-executive directors is disclosed in note 40 of the unconsolidated financial statements.
- The principal risks and uncertainties facing the Bank have been disclosed separately in this Annual Report.

### Corporate Social Responsibility (CSR)

The Board acknowledges its rightful duty to operate as a highly socially responsible bank. The activities undertaken by the Bank with regard to CSR are disclosed in the Corporate Sustainability section of this annual report.

### Auditors

The Auditors, M/s KPMG Taseer Hadi & Co. Chartered Accountants have completed their term of five years and are not eligible for reappointment as per the regulations. Therefore, upon recommendation of the Audit Committee, the Board recommends appointment of M/s A. F. Ferguson & Co., Chartered Accountants, as the statutory auditors of the Bank for the financial year 2021 in the forthcoming Annual General Meeting.

### Appreciation and Acknowledgements

The Board of Directors of MCB Bank Limited would like to thank the Government of Pakistan, the State Bank of Pakistan, the Securities & Exchange Commission of Pakistan and other regulatory bodies for their continued support, all shareholders and customers of the Bank for their trust, and our employees for their continuous dedication and commitment.

For and on behalf of the Board of Directors,



**Imran Maqbool**  
President & CEO  
MCB Bank Limited

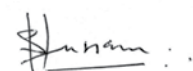

**Shahzad Hussain**  
Director  
MCB Bank Limited

February 10, 2021

### کریڈٹ ریٹنگ:

- بورڈ آف ڈائریکٹرز کی کمیٹیاں اور اسکے ضابطہ کار اپارٹر کو سالانہ رپورٹ کے کارپوریٹ گورننس کے سیکشن میں الگ سے بیان کیا گیا ہے۔
- سال کے دوران بورڈ اور اسکی کمیٹیوں کے اجلاسوں کی تعداد اور اس میں ہر ڈائریکٹر کی شرکت کی تفصیل اس سالانہ رپورٹ کے کارپوریٹ گورننس کے سیکشن میں الگ سے واضح کی گئی ہے۔

بینک، پاکستان کریڈٹ ریٹنگ ایجنسی (PACRA) کے نوٹیفیکیشن مورچہ 26 جون 2020ء کے مطابق بائز تیب ٹریل اے (AAA) اور (A1+) اے دن پلس کی داخلی طور پر بلند ترین طویل اور قلیل مدتی کریڈٹ ریٹنگ سے مستفید ہے۔

- ڈائریکٹرز کے ترجیحی پروگرام کی تفصیل کوڈ آف کارپوریٹ گورننس کی قہیل کے بیان میں دی گئی ہے۔

- غیر انتظامی ڈائریکٹرز بشمول آزاد ڈائریکٹرز کے لیے، بینک کے حصص یافتگان کی جانب سے منظور شدہ، مشاہرے کی پالیسی اس سالانہ رپورٹ کے کارپوریٹ گورننس کے سیکشن میں درج کیا گیا ہے۔

**انٹرنل کنٹرول اسٹینڈٹ**  
مٹجمنٹ کی جانب سے فنانشل رپورٹنگ پر اندرونی انضباط (ICFR) اور مجموعی اندرونی انضباط (انٹرنل کنٹرول) سے متعلقہ بیان کی، بورڈ بخوشی توثیق کرتا ہے۔ مٹجمنٹ کا اندرونی انضباط سے متعلق بیان سالانہ رپورٹ میں شامل ہے۔

- جرمین، پریذیڈنٹ/سی ای او اور غیر انتظامی ڈائریکٹرز کو ادا کیے گئے مشاہرہ کی تفصیل غیر مجموعی فنانشل اسٹیٹمنٹس کے نوٹ نمبر 40 میں درج کی گئی ہیں۔
- بینک کو درپیش بنیادی عوامل اور غیر یقینی کی صورتحال کو اس سالانہ رپورٹ میں الگ سے بیان کیا گیا ہے۔

کوڈ آف کارپوریٹ گورننس اور کمپنیز ایکٹ 2017 کے سیکشن 227 کے تحت بیانیہ بورڈ آف ڈائریکٹرز اس امر کو یقینی بنانے کے لئے پر عزم ہیں کہ سکیورٹی اینڈ ایچینج کمیٹی آف پاکستان کی جانب سے مہین کردہ کارپوریٹ گورننس کے تمام معیار اور شرائط اور کمپنیز ایکٹ 2017 کے سیکشن 227 کے تمام مطالبات کی مکمل پاسداری ہو۔ بینک نے کارپوریٹ گورننس کے بہترین معیار کو اختیار کیا ہے اور ڈائریکٹرز ہمسرت رپورٹ کرتے ہیں کہ:

### کارپوریٹ معاشرتی ذمہ داریاں سی ایس آر (CSR):

- بورڈ معاشرتی طور پر انتہائی ذمہ دار بینک کی حیثیت سے اپنے فرائض پر عملدرآمد کا مکمل ادراک رکھتا ہے۔ سی ایس آر (CSR) کے حوالے سے بینک کے کیے گئے تمام اقدامات کو اس سالانہ رپورٹ میں موجود کارپوریٹ سسٹین ایبلٹی (برداشت کی قوت) رپورٹ میں واضح کیا گیا ہے۔

- بینک کی مٹجمنٹ کی طرف سے تیار کردہ فنانشل اسٹیٹمنٹس اسکے معاملات اور کارکردگی، صورتحال، نقدی کے بہاؤ (کیش فلوز) اور ایکویٹی میں تبدیلیوں کا واضح اظہار کرتی ہیں۔
- بینک کے اکاؤنٹس کی درست کتابیں تیار کی گئی ہیں۔
- فنانشل اسٹیٹمنٹس کی تیاری میں اکاؤنٹنگ کی مخصوص پالیسیوں کا یکساں اطلاق کیا گیا ہے۔ اکاؤنٹنگ کے تخمینے موزوں اور محتاط اندازوں پر مبنی ہیں۔
- فنانشل اسٹیٹمنٹس کی تیاری میں پاکستان میں قابل اطلاق انٹرنیشنل اکاؤنٹنگ اسٹینڈرڈز کو مد نظر رکھا گیا ہے اور اس سے کسی بھی انحراف کو وضاحت کے ساتھ سالانہ اکاؤنٹس میں بیان کیا گیا ہے۔

### آڈیٹرز:

- بینک کے آڈیٹرز میسرز کے پی ایم جی (M/s KPMG) ٹاٹیر ہادی اینڈ کمپنی چارٹرڈ اکاؤنٹنٹس، نے اپنی مدت کے 5 سال مکمل کر لیے ہیں اور ضابطوں کے مطابق دوبارہ تقرری کی اہلیت نہیں رکھتے ہیں۔ لہذا، آڈٹ کمیٹی کی تجویز پر بورڈ آنے والے عام سالانہ اجلاس میں میسرز اے ایف فرگوسن اینڈ کمپنی چارٹرڈ اکاؤنٹنٹس کی مالی سال 2021 کے لئے بینک کے قانونی آڈیٹرز کی تقرری کی سفارش کرتا ہے۔

- کارپوریٹ گورننس کے بہترین معیار اور ضابطہ عمل سے کوئی قابل ذکر وگرواردانی نہیں کی گئی ہے۔
- بطور ادارہ بینک کے کام جاری رکھنے کی اہلیت میں کسی شک و شبہ کی گنجائش نہیں ہے۔
- سال 2020ء کے دوران 2.9 بلین روپے کا منافع قانونی ریزرو میں منتقل کیا گیا ہے۔
- اندرونی انضباط کا نظام مضبوط و خدوخال پر استوار کیا گیا ہے اور نہایت موثر انداز میں نافذ اور جانچا جاتا ہے۔
- چھ سال کا فنانشل مواد (ڈیٹا) اور اہم کارکردگی کے عوامل کو سالانہ رپورٹ کے متعلقہ سیکشن میں پیش کیا گیا ہے۔

### حکیم و حسین:

- ایم بی بی بینک کے بورڈ آف ڈائریکٹرز حکومت پاکستان، اسٹیٹ بینک آف پاکستان، سکیورٹی اینڈ ایچینج کمیٹی آف پاکستان اور دیگر انتظامی اداروں کی جاری معاونت، بینک کے حکیم ہولڈرز اور صارفین کا اسکے اعتماد اور اپنے ملازمین کا اسکے خلوص اور عزم پر شکر ادا کرتا ہے۔

- قانون میں مجوزہ شرائط کی قہیل میں حکیم ہولڈنگ (حصص کی ملکیت) کی ترتیب / نمونہ کو سالانہ رپورٹ سے منسلک کیا گیا ہے۔
- کوڈ آف کارپوریٹ گورننس کی قہیل (کمپلائنس) کا بیان سالانہ رپورٹ میں شامل ہے۔
- بورڈ کی تشکیل کو کوڈ آف کارپوریٹ گورننس کے قہیلات کے بنیاد میں سالانہ رپورٹ کے کارپوریٹ گورننس کے سیکشن میں بیان کیا گیا ہے۔
- سال 2020 کے دوران کسی بھی وقت بینک کے ڈائریکٹرز رہنے والے اشخاص کی نام سالانہ رپورٹ کے کارپوریٹ گورننس کے سیکشن میں الگ سے بیان کئے گئے ہیں۔

### مخائب و برائے بورڈ آف ڈائریکٹرز

### شہزاد حسین

ڈائریکٹر - ایم بی بی بینک لمیٹڈ

### عمران مقبول

پریذیڈنٹ اور سی ای او - ایم بی بی بینک لمیٹڈ

اثاثہ جات کے تناسب سے بھی ظاہر ہوتا ہے جو کہ اپنی 6 فیصدی مطلوبہ شرح کی نسبت 17.03 فیصد پر درج ہوئی۔ بینک کی کپٹال نریشن کے نتیجے میں لیورج (LEVERAGE) کا تناسب بھی اپنی 3.0 فیصدی ضوابطی حد سے خاصی بلندی کے ساتھ 7.03 فیصد پر درج ہوا۔ بینک نے لیکویڈیٹی کوریج کے تناسب کو 237.72 فیصد اور خالص سٹیبل (Net Stable) فنڈنگ کے تناسب کو 100 فیصدی مطلوبہ شرح کے مقابلہ میں 174.86 فیصد پر رپورٹ کیا۔

ایشیائی، جو کہ یورپی کا ذیلی ادارہ ہے، کی جانب سے ایم سی بی کو پاکستان کی اوور آل موست آؤٹ سٹینڈنگ کمپنی برائے 2020ء اور پاکستان کے مالیاتی شعبہ کی موست آؤٹ سٹینڈنگ کمپنی برائے سال 2020ء کے ایوارڈ سے نوازا ہے۔ ایم سی بی بینک کی سالانہ رپورٹ کو آئی سی اے پی / آئی سی ایم اے پی (ICAP / ICMAP) نے پہلی پوزیشن پر تعینات کیا۔ ایم سی بی نے گزشتہ 11 سال میں یہ اعزاز 10 مرتبہ جیتا ہے جس میں 08 مسلسل سال شامل ہیں۔

### مستقبل کی پیش بینی

نول کرونا وائرس کے پھیلاؤ کو روکنے اور معیشت کو مدد فراہم کرنے کے لیے حکومت کی جانب سے اٹھائے گئے بروقت اقدامات کے باوجود سال 2021ء پاکستان کے لیے ایک مشکل سال ثابت ہونے کی توقع ہے۔ حکومت کو اس وقت جو بڑی مشکل درپیش ہے وہ معیشت پر افراط زر کے دباؤ میں نمایاں اضافے کے بغیر اپنی نمو کو متحرک کرنا ہے۔

مزید برآں، فی الوقت تمام لگا ہونے والی ایم ایف کے پروگرام، جو کہ کووڈ-19 کی عالمگیر وبا کے باعث جمود کا شکار ہے، کی دوبارہ بحالی کی طرف مبذول ہیں۔ آئی ایم ایف کا پروگرام، پاکستان کے لیے بین الاقوامی اعتماد کی تلقین دہانی اور بین الاقوامی مارکیٹوں سے رجوع کرنے کی حکوتی صلاحیتوں کو بھی بڑھاتا ہے۔ اس کے علاوہ، یہ پروگرام سب سٹیز اور نااہلی کے خاتمے کے ذریعے مالیاتی انتظام پر کڑی نگاہ رکھنے کے اعتبار سے بھی اپنی نمایاں اہمیت کا حامل ہے۔ لہذا، آئی ایم ایف کے ساتھ مذاکرات میں کوئی بھی مثبت پیش رفت معیشت کے لیے بہتری کا باعث بن سکتی ہے۔

بینکنگ کا شعبہ موجودہ معاشی انحطاط، جو کہ مالی سال 2021ء میں بی ڈی پی کی محض 1.5 فیصدی نمو کی توقع میں گھرا ہوا ہے، فن ٹیک (Fin Tech) رکاوٹیں، بڑھتی ہوئی ضوابطی تعینات، اہم تجربے سیکھ رہی خطرات، کم ہوتے مارجنز اور اثاثہ جات کے معیار کو موجودہ کاروباری ماحول کے بڑھتے خدشات سے نمبر آنا ہے۔

ان خدشات کے درمیان، ایم سی بی اپنے ڈیپازٹ پرمیٹرزنگ کے منظم ڈھانچے، کشادہ لیکویڈیٹی بفرز، برانچوں کی وسیع رسائی اور کثیرالوجت حکمت عملی پر اپنی توجہ جاری رکھے ہوئے ہے جو کہ مضبوط رسک مینجمنٹ کے پلیٹ فارم اور جدید ترین ٹیکنالوجی کو اختیار کرنے کے ذریعے بینک کے ڈیجیٹلائزیشن اور ایک پائیدار مالیاتی نمو کے وسیع اہلیا دہیف کے حصول کے لیے جو شائے ہے۔

### رسک مینجمنٹ فریم ورک (خدشات کے مذاک کا انتظام)

رسک مینجمنٹ فریم ورک کو سالانہ رپورٹ میں الگ واضح کیا گیا ہے۔

افراد کی مسائل کی میرٹ اور کارکردگی کی بناء پر باقاعدہ مطابقت کے باوجود، بینک کی جانب سے قلیل مدت میں اخراجات میں تخفیف کی اور طویل مدت میں لاگت کو محدود رکھنے کے اقدامات میں توازن کے قیام پر کلیدی توجہ سے انتظامی اخراجات پر قابو رکھنے میں مدد ملی۔ جس کے باعث سال 2020ء کے دوران اس مدت میں 129 ملین روپے کی کمی درج کی گئی۔ چنانچہ لاگت اور آمدنی کا تناسب گزشتہ سال کی 43.4 فیصدی شرح کی نسبت نمایاں بہتری کے ساتھ 36.87 فیصد پر رپورٹ کیا گیا۔

اس توقع پر کہ سال 2021ء میں اسٹیٹ بینک آف پاکستان کی جانب سے دی گئی سہولتوں اور چھوٹ کی مدت ختم ہوتے ہی عالمگیر وبا سے متاثر پورٹ فولیو کے حوالے سے پروویژنگ (Provisioning) کی ضرورت پڑ سکتی ہے، بینک کی مینجمنٹ نے دانشمندی کا ثبوت دیتے ہوئے، اس زیر توجہ سال کے دوران، 4 بلین روپے کی جنرل پروویژن کا اندراج کیا ہے۔ چنانچہ، اپنے اثاثہ جات کے معیار کو محفوظ بنانے اور اس کو کسی بھی درجہ خدشات کو برداشت کرنے کی صلاحیت میں اضافہ کیا گیا ہے۔

مالیاتی پوزیشن کی مد میں، بینک کے غیر مجموعی بنیاد پر شمار کیے گئے کل اثاثہ جات دسمبر 2019ء کے حجم سے 16 فیصد کے اضافے کے ساتھ 1.76 ٹریلین روپے پر درج کیے گئے۔ اثاثہ جات کی ترکیب کا جائزہ خالص سرمایہ کاری میں 267 بلین روپے (36%) تک کا اضافہ ظاہر کرتا ہے جبکہ کمزور مقامی طلب کے باعث خالص قرضہ جات میں دسمبر 2019ء سے 26.5 بلین روپے (-) (5%) کی کمی دیکھی گئی تاہم سال 2020ء کی آخری سہ ماہی میں کل قرضہ جات 19.9 بلین روپے تک بڑھ گئے۔

بینک کے غیر فعال قرضوں کے حجم میں 1.77 بلین روپے کے اضافے کے ساتھ اگست 2019ء میں 51.19 بلین روپے پر رپورٹ کیا۔ اس اضافے کی بنیادی وجہ بینک کی جانب سے دانشمندانہ بنیاد پر کی گئی موضوعی درجہ بندی (subjective classification) تھی۔ بینک نے مخصوص (سپیکیفک) پروویژن کا اندراج کرتے وقت جبری فروخت کے فوائد کا شمار نہیں کیا اور اپنے غیر تصرف شدہ جنرل پروویژن کے رییزرو (ذخائر) میں 4.57 بلین روپے کا اضافہ کیا ہے۔ بینک کی کوریج اور ٹیکیشن کی شرحیں بالترتیب 98.97 فیصد اور 9.97 فیصد پر رپورٹ ہوئیں۔

واجبات کے حوالے سے، بینک کے ڈیپازٹس میں دسمبر 2019ء کی نسبت 144.74 بلین روپے (13%) کی بے مثال ترقی دیکھنے میں آئی جس میں کرنٹ ڈیپازٹس میں 15 فیصد کی نمو شامل رہی اور یوں کرنٹ اکاؤنٹ کی ترکیب 38 فیصد اور کاسا (CASA) کی شرح 92.96 فیصد پر رہی۔

اثاثہ جات اور لیکویڈیٹی کی آمدنی کی شرحیں بالترتیب 1.77 فیصد اور 18.88 فیصد پر رپورٹ ہوئیں جبکہ بلیو نی شیئر 137.02 روپے پر درج کی گئی۔

سرمائے کے ضوابطی مطلوبہ بات کی تعمیل کے ساتھ بینک کے کل سرمائے کی معقولیت کی شرح، 11.50 فیصد کی مطلوبہ سطح کی نسبت 20.98 فیصد رہی (بشمول بی بی آر ڈی کے سرکلر لیٹر نمبر 12 برائے سال 2020ء کے تحت محدود کیے گئے 1.50 فیصد کے کپٹل کنزرویشن ایفر کے)۔ بینک کے سرمائے کا معیار، بینک کی کاسن لیکویڈیٹی میٹر - I (CET-I) کی کل رسک ویٹڈ (Risk Weighted)

### منافع اور تخصیص:

31 دسمبر 2020ء کو اختتام پذیر سال میں منافع قبل و بعد از ٹیکس اور تخصیص، مندرجہ ذیل ہے:

| ملین روپے |                                                          |
|-----------|----------------------------------------------------------|
| 48,249    | منافع قبل از ٹیکس                                        |
| 19,212    | ٹیکس                                                     |
| 29,037    | منافع بعد از ٹیکس                                        |
| 55,777    | اختتامی غیر تخصیص شدہ منافع                              |
| (342)     | دیگر چارج (کمپریٹنڈو) آمدنی خالص از ٹیکس                 |
|           | پائیدار اثاثوں کے سرپلس پر فروخت سے                      |
| 23        | حاصل آمدن (خالص از ٹیکس)                                 |
|           | غیر بینکاری اثاثوں کے سرپلس پر فروخت سے                  |
| 5         | حاصل آمدن (خالص از ٹیکس)                                 |
|           | پائیدار اثاثوں کی تخمینوں سے اضافی                       |
|           | آمدنی کی غیر تخصیص شدہ منافع                             |
| 89        | انگریزی ٹیکس ڈیپریسی ایشن (قدر میں کمی) کی مد میں منتقلی |
| 55,552    |                                                          |
| 84,589    | تخصیص کے لیے دستیاب منافع                                |
|           | تخصیص:                                                   |
| 2,904     | قانونی ریزرو                                             |
| 5,925     | حتمی کیش ڈیویڈنڈ 5 روپے فی حصص 31 دسمبر 2019             |
| 5,925     | عبوری کیش ڈیویڈنڈ 5 روپے فی حصص 31 مارچ 2020             |
| 14,754    | کل تخصیص                                                 |
| 69,835    | اختتامی غیر تخصیص شدہ منافع                              |
| 24.50     | فی حصص آمدنی۔ (روپے)                                     |

### ڈیویڈنڈ

بورڈ آف ڈائریکٹرز نے 31 دسمبر 2020ء کو اختتام پذیر سال کیلئے 15 روپے فی حصص کے حتمی کیش ڈیویڈنڈ کا اعلان کیا ہے جو کہ حصص یافتگان کو 31 مارچ 2020ء کو اختتام پذیر سرمایہ کے لیے 5 روپے فی حصص، کے پہلے سے ادا شدہ عبوری ڈیویڈنڈ کے علاوہ ہے اور اس طرح ڈیویڈنڈ ادا کرنے کی شرح 81.63 فیصد پر کارڈ ہوئی ہے۔ اس اعلان کے اثرات کو مندرجہ بالا تخصیص میں شمار نہیں کیا گیا ہے۔ اسٹیٹ بینک آف پاکستان کی ہدایات کی روشنی میں بینک نے دوسری اور تیسری سرمایہ کے لیے ڈیویڈنڈ کا اعلان نہیں کیا ہے۔

### کوڈ-19 ایک عالمگیر وبا

بڑھتے انضمامی فریم ورک، ڈیجیٹل دور میں داخل ہوتے اداروں کے باعث مسابقتی ماحول میں اضافہ اور برانچوں کی کارروباری لاگت میں بڑھوتی نے پاکستان میں روایتی بینکاری کے اسلوب کو ایسے عوامل کی تلاش پر مائل کیا ہے جہاں وسیع الہیاد، گلداری، قابلیت اور پذیرائی کا موجب بنتے ہوئے اس میں موجود مواقع سے مستفید ہوا جاسکے۔

سال کے دوران، کوڈ-19 کے ظہور نے موجودہ بینکنگ کی صورتحال میں مزید مشکلات پیدا کر دیں جس کے باعث اس صنعت کو سماجی فاصلوں اور دیگر حفاظتی انتظامات کے ذمہ دارانہ نفاذ کرنے کے ساتھ ساتھ، اپنی ڈیجیٹل مالیاتی خدمات پیش کرتے ہوئے نئی ٹیکنالوجی اور جدت کو اختیار کرنا پڑا۔ مالیاتی، انضمامی اور اصلاحاتی اہماریوں کی جانب سے بروقت اور ہم آہنگ ردعمل نے حتمی کے خدشات سے ابھرنے والے اثرات کو کافی حد تک زائل کیا اور کوڈ-19 کے پھیلاؤ سے پیدا ہونے والے مضمرات کو دور کرنے میں اپنے اہم کردار کو برقرار رکھا۔

ایم سی بی نے اپنے بزنس کوئیٹیٹی پلان (Business Continuity Plan) کا اجرا کر کے بہت سے بروقت اقدامات کا آغاز کیا تاکہ اپنے صارفین اور ملازمین کے تحفظ کو یقینی بناتے ہوئے کوڈ-19 کے پھیلاؤ سے جڑے خدشات کا تدارک کر سکے اور بعد میں عالمگیر وبا کے ردعمل کے طور پر، حکومت کی جانب سے قرضوں کی وسعت اور عوام الناس کو بینکنگ کی ضروری خدمات کی فراہمی کے نمایاں جوابی اقدامات میں تعاون کا اہم کردار بھی نبھایا۔

تبدیل ہوتی کاروباری اور کلاں معاشی صورتحال کے تناظر میں بینک نے اپنی توجہ ایک مضبوط رسک مینجمنٹ پلیٹ فارم، کاروباری قابلیتوں کی تاکید، صارفین کو ایسی خواہش کے مطابق خدمات کی فراہمی اور ٹیکنالوجی سے مزین اپنی مصنوعات میں جاری افزودگی جیسے معاملات میں پیش رفت پر مرکوز رکھی جو مزید ایک سال کے لیے نمایاں معاشی نمو کی مضبوط بنیاد کا باعث بنی۔

### کارکردگی کا جائزہ

اپنی خالص آمدنی میں مضبوط اضافے کے ساتھ ایم سی بی کا منافع بعد از ٹیکس، 31 دسمبر 2020 کو اختتام پذیر مدت کے لیے 21 فیصد کی نمو کے اندراج کے ساتھ 29.04 بلین روپے پر جا پہنچا۔ اور اس طرح گزشتہ سال کی 20.23 روپے فی شیئر کے مقابلہ میں 24.5 روپے فی شیئر کی آمدنی کو درج کیا گیا۔

گرنٹ ڈیپازٹس میں نمایاں بڑھوتی، اپنی سرمایہ کاری کے سچورٹی پروڈکٹنگ کی بروقت منتقلی اور اسکی قیمتوں کے دوبارہ جانچنے کے فوائد کے باعث بینک کی خالص انٹرنسٹ آمدنی 20 فیصد کے اضافے کے ساتھ 71.3 بلین روپے پر ریکارڈ کی گئی۔

سال 2020ء کے لیے بینک کی فیس کی آمدنی، لاک ڈاؤن کی بدولت محدود کاروباری سرگرمیوں اور کم لین دین کی بنیادی وجہ سے گزشتہ سال کی نسبت 3 فیصد تک کم ہوئی۔ تاہم، اس لاک ڈاؤن کے خاتمہ کے بعد فیس آمدنی اپنے معمول کی طرف بڑھ رہی ہے۔ اس ارتقائی خط آمدنی کی توقعات کے درمیان، اپنی سرمایہ کاری کے پورٹ فولیو کی مدت کے پیش قدم انتظام کے نتیجے میں، اس زیر تجزیہ سال کے دوران بینک نے 3.3 بلین روپے کا کمیٹیٹل گین حاصل کیا ہے۔ چنانچہ، کل فیرمارک اپ آمدنی 9 فیصد کی نمو درج کرتے ہوئے 18.14 بلین روپے پر جا پہنچی۔

کاروباری اخراجات کے حوالے سے (ماسوائے عین فنانسنگ کی کٹوتی کے)، اخراجات کے دباؤ، برانچوں کی تعداد میں مزید اضافہ اور ٹیکنالوجی کے ڈھانچے میں مسلسل سرمایہ کاری اور اس کے ساتھ ساتھ اپنے



## ڈائریکٹرز رپورٹ:

تھامز بڑھ کر 8.1 فیصد درج ہوا۔ تاہم، سال 2020ء کی دوسری ششماہی کے دوران لاک ڈاؤن کے خاتمہ سے آمدنی میں ہونے والی نمو سے اس صورتحال میں قدر سے بہتری پیدا ہوئی۔ جولائی تا دسمبر 2020ء کے دوران پاکستان کے مالی خسارے کا حجم 1,137 بلین روپے (بی ڈی پی کا 2.5 فیصد) رہا۔

یورڈ آف ڈائریکٹرز کی جانب سے ہم ایم سی بی بینک لمیٹڈ کی سالانہ رپورٹ، برائے سال ختمہ 31 دسمبر 2020ء کو پیش کرتے ہوئے نہایت مسرت محسوس کرتے ہیں۔

### معاشی جائزہ:

#### عالمی معیشت

دریں اثناء، افراط زر میں (بنیادی سال 2016 - 2015)، حکومت کی جانب سے کووڈ-19 کے لیے لگائے گئے لاک ڈاؤن کی وجہ سے طلب میں کمی کے نتیجے میں، سال 2020ء کی پہلی ہی ماہی میں کمی دیکھی گئی۔ کم قیمتیں (Low Base Effect) بھی اپنا کردار ادا کرتے ہوئے افراط زر کی شرح پر کمی کے لیے دباؤ کا باعث بنا۔ اوسطاً، این سی پی آئی (NCPI) سال 2020ء میں 9.53 فیصد پر جا پہنچا۔ اپنی ناقص معیشت کی مدد اور شرح ترقی کو ختم رکھنے کے لیے انٹیٹ بینک آف پاکستان نے پالیسی ریٹ کو 13.25 فیصد سے کم کرتے ہوئے 7.00 فیصد کی شرح پر مقرر کر دیا اور اس طرح سال کے دوران 625 ہیز پوائنٹس کی مجموعی کمی کا اندراج کیا۔

زیر تجزیہ سال میں عالمی صحت عامہ پر ایک فقید المثال بحران چھایا رہا۔ جس کے دوران، کووڈ-19 کی عالمگیر وباء نے پوری دنیا کی معیشت کو جھجھوڑ کے رکھ دیا اور دنیا بھر میں حکومتوں اور ان کے متعلقہ مرکزی بینکوں کو مالیاتی اور انضباطی آسانئیں کے فوری اقدامات اٹھانے پر مجبور کر دیا۔ امریکہ میں فیڈرل ریزرو نے کمزور ہوتی معاشی تحریک اور افراط زر میں تعاون کے لیے، پالیسی ریٹ کو 0 تا 0.25 فیصد تک کم کر دیا اور یوں مجموعی طور پر 150 بی پی ایس کی کمی درج کی۔ امریکی فیڈرل ریزرو کے زیر اثر تمام ابھرتی منڈیوں کے مرکزی بینکوں نے اپنی معیشتوں میں بہتری اور ٹھہراؤ کے لیے انٹرسٹ ریٹ میں کمی کی۔ امریکی حکومت نے عالمگیر وباء سے پیدا ہونے والی معاشی ابتری میں مدد فراہم کرنے کی غرض سے 2.3 ٹریلین امریکی ڈالرز کی وفاقی امداد کے بڑے چیک، پر دستخط کیے ہیں۔

سال کے دوران، پاکستان نے مختلف ذرائع، جن میں آئی ایم ایف (IMF)، ورلڈ بینک (WB)، ایشین ڈیولپمنٹ بینک (ADB) اور ایشین انفراسٹرکچر انویسٹمنٹ بینک (AIB) شامل ہیں، سے وصول ہونے والی رقم کی وجہ سے بیرونی محاذ پر دباؤ کو کامیابی سے برداشت کیا۔ ایک مزید پیش رفت جو کہ اس انوکھے اور صبر آزما دور میں مدد اور تعاون کا باعث بنی، وہ جی-20 ممالک سے قرض کی ادائیگیوں میں سہولت بھی تھی۔

برطانیہ میں، بینک آف انگلینڈ نے، اسی مائٹ میں، انٹرسٹ ریٹ کو 0.75 فیصد سے کم کر کے 0.10 فیصد تک مقرر کر دیا اور معیشت پر کووڈ-19 کی عالمگیر وباء کے اثرات سے مقابلہ کرنے کے لیے اپنے ہائڈرزی خریداری کے پروگرام کو وسیع کیا۔ بریگزٹ (Brexit) کے محاذ پر، برطانیہ اور یورپین یونین نے 11 ماہ کے طویل مذاکرات کے بعد، اس کی حتمی تاریخ سے محض ایک ہفتہ پہلے، ایک تاریخی معاہدہ کیا ہے۔ اگرچہ اس معاہدہ میں چند امور ابھی بھی حل طلب ہیں، تاہم، حالیہ واقعات نے برطانیہ کی یورپین یونین سے علیحدگی کے بارے میں غیر یقینی صورتحال کو کافی حد تک واضح کر دیا ہے۔ دریں اثناء، یورپ نے 20 بلین یوروز کے خالص اثاثہ جات کی ماہانہ خریداری کے موجودہ مقداری آسانی کے پروگرام کے علاوہ اپنی پیار معیشت کو توانا کرنے کے لیے پیڈیاٹک ایمرجنسی پر چڑھ کر پروگرام (PEPP) (Pandemic Emergency Purchase Program) کا آغاز بھی کیا ہے۔

کرنٹ اکاؤنٹ کی طرف بڑھتے ہوئے، پاکستان کی برآمدات، درآمدات کے مقابلہ زیادہ متاثر ہوئیں جو کہ گزشتہ سال کے حجم کی نسبت سال 2020ء میں 11.57 فیصد تک کم ہو گئیں۔ تیل کی بین الاقوامی قیمتوں میں نمایاں کمی کے باوجود درآمدات میں محض 6.48 فیصد کمی واقع ہوئی۔ ترسیلات زر سال 2019ء کی 22 بلین امریکی ڈالرز سے بڑھ کر سال 2020ء کے دوران 26 بلین امریکی ڈالرز (سال بہ سال کی بنیاد پر -17%) تک جا پہنچیں۔ کرنٹ اکاؤنٹ میں ترسیلات زر میں اس اضافے کی وجہ سے سال 2020ء میں سرپلس ریکارڈ کیا گیا۔

گو ابھی یہ آزمائش خاتمہ سے دور ہے، تاہم سال کے اواخر میں فائزر (Pfizer)، ماڈرینہ (Moderna) اور آسٹرا زینیکا (Astra Zeneca) کی جانب سے کووڈ-19 کی ویکسین کی ویکسین کے اعلان سے کچھ امید اور سکھ کا سانس بھی ملا ہے جو مارکیٹ کے رجحان میں بہتری کا باعث بنا ہے۔ اب ساری نظریں سال 2021ء کے دوران کووڈ-19 کی ویکسین کی ترسیل اور فراہمی کے لیے حکومت کی انتظامی صلاحیتوں کی طرف لگی ہیں۔

کرنٹ اکاؤنٹ بیلنس میں بہتری کے نتیجے میں سال 2020ء کے دوران، پاکستانی روپے میں امریکی ڈالر کے مقابلہ میں 3.22 فیصد کمی معمولی فرسودگی ہوئی جو کہ اگست 2020ء میں 168.44 روپے فی ڈالر کی بلند سطح کو ٹھوکر سال کے اختتام تک 159.83 روپے فی ڈالر پر بند ہوا۔ کے ایس ای (KSE)-100 انڈیکس میں عمومی شکل کی بحالی دیکھی گئی جو کہ مارچ میں 27,047 پوائنٹس کی اپنی کم ترین سطح کو خود سے درست کرتے ہوئے سال کے اختتام تک 43,755 پوائنٹس پر پہنچ گیا۔

#### مقامی معیشت

پاکستان نے سال کا آغاز مثبت رخ سے کیا جیسا کہ حکومت کی جانب سے، سال 2018ء سے اپنے دور کے آغاز سے ہی، اٹھائے گئے کمزور معاشی اقدامات کے ثمرات حاصل ہونا شروع ہو گئے۔ تاہم، سال 2020ء کے دوران، دیگر ممالک کی طرح، پاکستان کی معیشت بھی کووڈ-19 کی عالمگیر وباء سے شدید متاثر ہوئی اور حکومت اور مرکزی بینک کو فوری پالیسی اقدامات اٹھانے پر مجبور کر دیا۔

مالیاتی حوالے سے، حکومت نے 1.2 ٹریلین روپے کے ایک امدادی پیکیج کا اعلان کیا جس سے حکومت کے اخراجات میں اضافہ ہوا۔ چنانچہ مالیاتی خسارہ، جس کا ابتدائی تخمینہ بی ڈی پی کا 7.1 فیصد

# Groups Review

## Wholesale Banking Group

The Wholesale Banking Group (WBG) continued its legacy of providing a stellar performance by managing to achieve its goals despite a tumultuous year where systematic risks and changes abounded. The core businesses of the Group, including Corporate banking, Investment banking, and Transaction banking all contributed towards the Bank's bottom line by expanding the wallet share and bringing in New to Bank Customers.

During the year, several strategy papers were issued which included group limit settings for large corporates, limit review exercise, and Risk Asset Acceptance Criteria (RAAC). To manage the portfolio on a proactive basis, the Group continued to closely monitor the concentration of sectors and regions.

In the Bank's Spirit, The Group managed to use its relationship and resources to actively Cross-sell various consumer products such as auto, home, personal loan to employees of Corporate Customers. The Group through actively exploring wallet share sizing, and being on the pulse of its relationships, secured cash management mandates for Corporate clients, and customer investment requirements in GOP securities.

The Group's investment arm managed to close several transactions and as part SBP's relief efforts helped facilitate the Bank's customers to meet their financial obligation. MCB's Investment Banking received recognition from international institutions:

- **ABF Corporate & Investment Banking Awards 2020**
  - o Equity Deal of the Year - Pakistan for Maple Leaf Cement
  - o Syndicated Loan of the Year – Pakistan for Mobilink PKR 45 bln Syndication
- **The Asset Triple A Asia Infrastructure Awards 2020.**
  - o Telecom deal of the year in Pakistan (Mobilink PKR 45 bln Syndication)
- **The Asset Triple A Islamic Finance Awards 2020**
  - o Best Corporate Sukuk- Engro Polymer & Chemicals Limited 8.75 billion rupees OTC-listed Sukuk certificates (Lead Arranger)
  - o Best Acquisition Financing- AKT Sugar Mills 1.5 billion rupees syndicated Islamic term facility to acquire Gulf Sugar Mills (Lead arranger and adviser)
  - o Best Syndicated Loan- Pakistan Mobile Communications Limited 45 billion rupees syndicated term finance facility (Mandated lead adviser and arranger)

MCB Cash Management crossed the annual volume milestone of PKR 2.0 trillion in 2020 and remains one of the leading corporate cash management banks in Pakistan. A focus on the processing of Initial Public Offerings (IPO), Right issues, E-Dividends, and the digitization of domestic payments' modules contributed to the realization of this achievement. The combination of a vast branch network, state of the art technology platforms, efficient relationship management, came together to support growth in the Group, and meet the requirements of top Corporations across the country.

MCB Burqraftaar, the banks Home Remittance product remains amongst the top remittance payout banks in Pakistan. With the bank's extensive branch network and remittance partners scattered across the globe, we proudly contribute towards the national interest of Pakistan by promoting legal channels. Burqraftaar under its umbrella offers a suite of conventional and digital products for the ease and convenience of overseas Pakistanis and their loved ones back home.

In 2020, Strategic Acquisitions and Investments Division managed the divesture for MCB Financial Services Limited (MCBFSL), a wholly-owned subsidiary of MCB Bank Limited. The Division strives to explore internal and external options for the Bank's strategic growth.

WBG team is geared up for further growth strategy in 2021, by continuing its focus on prudent book building. In early 2021, WBG and International Banking have been merged into one group, Corporate Finance and International Banking (CFIBG) to create synergies and bring efficiency.

## International Banking Group

MCB Bank has footprints in the International arena which includes Sri Lanka, Bahrain, and United Arab Emirates (UAE).

### Sri Lanka Operations:

Bringing its regional experience & expertise, MCB Bank Limited, commenced its Sri Lanka operations in 1994. Starting off as a single branch, the bank focused on trade-related business. The bank has steadily grown over the years and currently holds the second-largest branch network among foreign banks in the country. With the development of a full suite of well-diversified product range, the bank now caters to the needs of segments of Retail, SME & Corporate clients. Today, deposits and advance portfolios are over LKR 20 Billion each with an overall asset base of over LKR 32 Billion.

Despite a much challenging operating environment and badly impacted economic performance of the country mainly due to the Covid-19 outbreak, MCB Sri Lanka

remained profitable for the year 2020. Also managed to secure its local rating [SL] A+ (Stable) by ICRA Lanka Limited, which indicates the better portfolio, risk, and liquidity management of the bank.

To ensure sustainability against the market risks, the bank continued to closely monitor its concentration of sectors and portfolios. During the year, several strategic decisions have been taken to effectively manage the lending portfolio while reducing the credit risk of the Balance Sheet. Further, The Bank has adhered to all necessary guidelines under the Covid-19 relief scheme announced by the Central Bank of Sri Lanka. Further, the bank has been able to improve its CASA and AD Ratio substantially during the year.

During the difficult market conditions for core banking business, the bank implemented several cost control initiatives which helped to restrict the total operating cost of the bank 29% below its annual budget for 2020.

#### **UAE Operations:**

MCB Bank commenced its operations in Dubai, UAE as a wholesale banking branch in 2015.

The franchise's strategy of diversifying its portfolio on both the liability and asset front has resulted in a dynamic portfolio with an ability to adjust as per market challenges. Focus on Financial Institutions and trade based short term liquid assets helped in achieving not only the bank's growth targets but also a portfolio with acceptable risk. The branch has been able to generate quality returns, by increasing its productivity.

Despite the economic backdrop, the Branch was able to maintain its deposits base in 2020, through diversification of the liability portfolio, while maintaining a CASA base of over 92%.

MCB UAE stood fast and firm in its commitment to expanding its outreach and in achieving its objectives while safeguarding the interest of our shareholders through prudent policy and by relying on the Bank's core strengths.

#### **Bahrain Operations:**

MCB wholesale Bank Bahrain's key focus during the year was to align its books with current market demands. The branch worked on maintaining an adequate balance sheet size that was more responsive to the approved risk and return framework.

The focus of the franchise was to develop and implement several policies and procedures to cover ever-evolving regulations. MCB Bahrain also remained focused on AML/CFT and compliance areas. The branch's future

strategy focuses on developing and mobilizing organic liquidity. Gap assessments with regards to internal policies and procedures were conducted and later approved for onward implementation.

Creating a safe environment for its customers and employees, MCB Bahrain maintained strong customer and employee safety protocols during the pandemic. Meetings through digital medium were implemented.

### **Retail Banking Group (RBG)**

The year 2020 brought with it a unique set of opportunities and challenges. The environment became a test of our resolve, capabilities and commitment. Half of MCB Bank's branches were closed for a better part of the first half of 2020 due to COVID-19. MCB Head Office, Circle and Regional teams worked at almost 50% capacity while Federal/Provincial Government and the regulators were issuing guidelines on a real time basis to better safeguard customers and to ensure continuity of operations in the banking sector. RBG branches and offices have made this possible during unprecedented times.

Team RBG remained focused on core revenue streams and enhancing cross selling volumes with efficient cost management. Through a smart mix of products, process initiatives, sales support programs, service management activities, robust governance & untiring efforts of our teams, "The Best Selling Machine" has enabled RBG to celebrate another victorious year. The addition of Relationship Managers in our branches & "Participation From All Initiative" to ensure focus on relationship management, core deposit mobilization & cross selling of bank's products has improved overall customer experience.

RBG, being the biggest deposit and revenue contributor to the overall growth of MCB Bank, has always been instrumental in building "low-cost deposits" with CASA mix standing at 94%. The best part of this year has been the phenomenal and our highest ever Average Deposit Growth achieved in both Total Deposits as well as Current Deposits. Growing fee income from diverse products and branch operations has been instrumental in increasing profitability. Prudent month-on-month budget management, starting from a branch level, ensured revenue maximization and controls over expenses.

During 2020, in line with SBP's guideline to facilitate customers during the COVID-19 pandemic, our credit team facilitated relaxations for existing lending clients and offered "Rozgaar Scheme" to offset the cash flow impact of the pandemic. Agri. Financing also witnessed a modest growth.

The year had been especially fruitful with the introduction of new products & initiatives. MCB Bank is proud to be one of the leading banks that offered the SBP mandated Roshan Digital Account, a digital banking solution for Non-Resident Pakistanis (NRPs) and Resident Pakistanis. The Roshan Digital proposition includes digital payments, savings and investments avenues. MCB Bank is the only bank offering 9 foreign currencies and has succeeded in attracting good volumes.

MCB One Current Account is another iconic product launched in 2020. The product caters to the needs of all customer segments and demographics.

#### **Governance:**

Strict implementation of policies and procedures has been embedded for a robust compliance and control culture to maximize operational efficiency and governance. Complete focus on Operation Excellence has helped us achieve higher sales, better quality service and enhanced levels of internal controls. In implementation of branch network optimization strategy, a number of low potential branches were merged, relocated or closed, while under the network expansion plan 21 new branches were opened during the year. MCB ATMs uptime remained 98.3% despite the challenges faced due to Covid-19 pandemic. Introduction of Pak Rupee term deposit rollover / renewal facility and FCY Term Deposits centralization has resulted in more business, efficient portfolio tracking and monitoring.

We are confident that our passion and dedication will continue to grow in the future. RBG intends to build further momentum with Roshan Digital to engage the maximum NRPs for account opening and investment. The Group also intends to focus on conversion of Home Remittances, soliciting NTBs, retention / deepening of existing deposits on-boarding Cash Management and Payroll & Collection Mandates in 2021. Dispersion of funds to the mass market in order to meet SBP's vision of providing subsidized low cost mortgages, construction finance and loans to youth (Kamyab Jawan) will also be done in a prudent manner.

#### **Fight against COVID-19 & similar challenges:**

COVID-19 was a major event of 2020 that impacted all aspects of Group operations. RBG lost a number of good colleagues and family members during the continuing pandemic. Their courage to resolutely perform their duties during these testing times and their contribution to our success shall always be remembered and cherished. Developments on the vaccine front and its gradual roll-out worldwide are likely to keep up the expectations of healthy recovery during 2021. However, the effectiveness of these measures is yet to be gauged.

Our continuing challenge remains maintaining and building upon the momentum we have created & maintained throughout the past few years. With over 1,400 branches and sub-branches spread across 56 regions and more than 8 million customers - the team, with its commitment, passion and robust execution plan, is geared to surpass expectations year-on-year through sustained performance to achieve even greater results.

### **Special Assets Management**

The year 2020 has been an extremely challenging time for Pakistan's economy due to Covid-19 pandemic and variety of other reasons. However, despite all these challenges, SAM made continued progress on its strategic path and recorded cumulative recovery of Rs. 2.4 Billion by settling a large number of hardcore and protracted defaults. While achieving improved operational efficiency, SAM further strengthened its policy & procedural framework and built capabilities for future growth. Today, the diversity, creativity and expertise of SAM's team in management of NPLs are unique, which differentiate the Bank amongst its peers in this particular business segment.

While economy in the year 2021 is expecting growth viz. recital of the businesses, Non-Performing Loans (NPLs) of the banking sector have already flowed to Rs. 868 Billion as of September 30, 20 from Rs. 776 Billion at the end of the year 2019. Therefore, we believe that future still holds challenges for the banking industry in the context of remedial management of impaired advances. Nevertheless, SAM will continue to focus on its milestones to take full advantage of potential growth opportunities, arising out of revival of manufacturing & real estate sector and overall business environment, to mark 2021 another banner year to maintain its leadership position in the industry.

### **Consumer Banking Group**

MCB Consumer Banking continues to win confidence and trust for its valued customers for financial solutions of their needs. Consumer products are designed in a way keeping in mind the convenience and hassle free financial solution to match their Lifestyle. MCB consumer banking showed a stable growth and also introduced new product variants to further enhance customer's confidence.

#### **Wealth Management:**

The Banca business has been on a steady upward growth trajectory over the past few years. Sales grew from Rs. 1.4 Billion to Rs. 3.15 Billion in the 5 year period from 2015-2019, a CAGR of 22%. Despite the impact of COVID in 2020, MCB still performed strongly and achieved Rs. 2.6 Billion in Sales, about 82% of the number achieved in 2019. This demonstrated the traction, strength and resilience of the business, as the overall industry numbers

were down by 30% relative to 2020. Relative profitability was even higher through a focus on cost management and timely renewal of policies, with profits from the business at 85% of the previous year.

With more favorable market conditions in the second half of the year, Investment Services posted impressive numbers in 2020 with total sales of Rs. 5.7 Billion in the year, a growth of 124% from 2019. In terms of revenue and profits, MCB's Investment Services business was the clear market leader with the highest numbers in the industry.

### Consumer Lending:

The MCB consumer lending book size at the end of year 2020 was over PKR 28 Billion, serving over 134,000+ customers across all lending products.

During the year 2020, consumer lending underwent a series of challenges related to economic and operational fronts, mostly brought about by the Covid-19 pandemic. The business, however, got some boost in sales in the latter half of the year as KIBOR declined thereby reducing the cost of borrowing for the end-customers.

During this year, we launched an auto fleet loan product to cater to Small and Medium Enterprises. In line with SBP instructions we also started offering subsidized home loans under Government Markup Subsidy Scheme and also launched a home loan variant as well as a lien-based credit card solution for non-resident Pakistanis.

The business continued to form strategic alliances with OEMs to provide value-added service to our auto customers and also offered high end tactical and regular discounts campaigns to its esteemed credit card customers.

To assist our credit card customers better, we also introduced SMS banking and IVR self-service channel.

### Capital Market

Beset by an unprecedented health crisis, 2020 was undeniably a challenging year for the market. Concerned about the devastating implications of this economic shock on an already struggling economy the market succumbed to panic selling. Market volatility increased beyond measure and at times stretched to levels triggering trade halts. A critical support was however found at 27,267 points where accommodative monetary stance and generous fiscal stimulus arrested the panic induced free fall. Efficacy of these measures was further amplified by a corresponding flattening of Covid-19 curve and subsequent lifting of lockdowns. This injected a fresh impulse in the market and set it off on the path to recovery. The rally was supported by improving high frequency

indicators, stabilizing macro backdrop, announcement of construction amnesty, satisfactory vaccine trials, status quo in FATF review and visible progress towards circular debt resolution. Dampeners in the shape of stalled IMF program, exorbitant inflation outturns, political tensions and onslaught of second wave of Covid-19 kept the gains in check. Nonetheless, incredibly cheap valuations and relative attractiveness of equity as an asset class amid a low interest rate environment kept the market momentum up and running. Consequently, benchmark index closed the year in green posting a return of ~7.41% (4% in dollar terms). Following suit, Capital Markets Division took this adversity in stride and managed to outperform the benchmark by a staggering margin for the year while actively mitigating risk. Expecting the Bull Run to continue well into 2021, we express optimism on market outlook and Capital Market Division's future performance.

### Treasury and FX Group

During the year 2020, Pakistan's economy was hit hard by the Covid-19 pandemic. MCB's Treasury & FX Group, however, efficiently navigated through these unprecedented circumstances. The Group surpassed its performance targets for the year and made a significant contribution to the Bank's markup and non-markup revenues.

The year under review was marked by high interest rate volatility with the policy rate coming down to 7.00% from 13.25% as the central bank tried to mitigate the impact of the coronavirus pandemic on the economy. MCB Treasury took advantage of this opportunity and booked capital gain on some portion of its bond portfolio. The yield curve, however, steepened as the year progressed, indicating the market's expectations of impending rate hikes. In such an environment, Treasury continued to decrease the Duration of its investment portfolio. Moreover, due to the outflow from SCRA accounts (commonly known as hot money), the FX market also witnessed significant USDPKR volatility during the first half of the calendar year. Once again, Treasury expertly managed its exposures. Hence, 2020 proved to be an outstanding year for MCB's FX Income. In addition, MCB Treasury & FX Group ensured that its clients were kept up-to-date with the quickly changing market dynamics. All in all, the interbank desks (both Money-Market and FX), despite the market volatility, maintained their status as top market-makers.

More than ever, the year 2020 was full of uncertainties that exposed businesses to various market risks. As an authorized Derivatives Dealer, our derivatives team educated suitable clients about the use of derivatives to manage their risks and offered a range of derivative products to suit their hedging needs.

During the year, MCB Treasury Research Desk ensured that the internal and the external stakeholders of the bank are catered for by assisting them in gauging the impact of the Covid-19 pandemic on the state of the economy. The Research Desk delivered timely projections of foreign exchange rates, interest rate, inflation and other macroeconomic variables to the Bank's clientele and kept the stakeholders informed about the latest developments on the Covid-19 front. Moreover, the Research Desk published Daily Economic Snapshot, and released bi-monthly MCB Purchasing Managers' Index (MCB PMI) to the Bank's clients to measure the strength of the manufacturing sector in the economy.

## Information Technology Group

Information Technology has transformed the banking industry worldwide for the better and has provided us with the necessary tools to manage the challenges of an ever growing economy. The integration of technology has been the cornerstone of recent financial sector reforms across industry aimed at increasing the productivity and efficiency of financial operations, strengthening the banking sector to meet high consumer expectations and to secure a leadership position amongst peers. However, the most challenging part of the ever changing world of 'Technology' is to neutralize the impact of obsolescence and advancements at a strategic level without compromising availability, security and reliability of the 'Data and Information'.

In MCB Bank, the entire management and the board is committed to enrich Information Technology infrastructure at the enterprise level which is clearly evident from the investments the bank chose to make in the recent past. We are committed in our mission "To be a leading bank in the Information Technology sphere, with our focus on digital transformation to enhance customer experience". The multi-pronged approach comprises of but is not limited to one of the largest footprint of online branches with a centralized core and associated banking systems, strategic acceptance systems at both eCommerce and POS levels, robust Internet Banking and Mobile Banking platforms, revolutionary product and services offered through world class Digital Lounges, highly efficient & scalable Contact Centers, one of its kind state-of-the-art Enterprise Data network, established International footprint, proactive controls to combat money laundering and frauds, interoperability with other financial entities and Branchless Banking solutions to facilitate the customers irrespective of their location.

Information Technology Group (ITG) at MCB Bank is comprised of a team consisting of thorough professionals having a proven track record of project delivery and IT infrastructure management at an enterprise. The components of the organizational structure of ITG are

included with IT Enterprise Infrastructure, IT Operations, IT Software Solutions, IT Support Services, IT Service Management, IT Information Security, IT Business Technology, IT Compliance and Internal Control, IT Business Continuity, IT Project Management, IT Procurement and IT Financial Services who are committed to servicing it's consumers both internally and externally 24/7. Recently ITG successfully streamlined existing operations across board and recorded the highest ever uptime of core banking along with affiliated applications throughout the year. Nevertheless, the availability of Data Centers and the back-end systems along with all necessary services were remarkably remained at five-nines. In addition to operational achievements by ITG, new benchmarks were achieved to comply with the highlighted recommendations by external and internal audit committees and the SBP.

ITG had also closely monitored Bank wide projects and had driven related technology functions with a motive to accomplish the assigned tasks within the agreed timelines. Close coordination and liaison with working groups and vendor relationship management are the key factors in above achievements.

Looking forward to 2021, IT Group is more committed towards:

- Dynamic Customer Experience with Cross-TouchPoints
- Revolutionizing payments & Driving Financial Inclusion
- Agile & Goal Oriented Product Service Road Map Delivery
- Payment Card Industry: Compliance: PCI DSS Certification
- Improving Information & Cyber Security ecosystem

Apart from above commitments, IT Group shall continue to empower the staff with the requisite trainings and job enrichment plans to impart motivation and job success factors.

## Digital Banking

COVID-19 brought disruptions in the global economy revolutionizing the way businesses have been conducted for decades. The world saw a significant shift towards digital payments giving birth to a new era. Digitization is on course to render the traditional modes of payment redundant. At MCB Bank the core driving force has always been in curating a personalized customer experience that adds value to their life. MCB Banks Digital Banking business has been designed to cater to the needs of the customers to tackle the ongoing pandemic.

### Debit Card

MCB Bank was the first bank to offer chip based debit cards and it has one of the largest debit cards portfolio. In 2020 MCB introduced Near Field Communication (NFC) enabled debit cards for its consumers. This new technological innovation is rapidly being adopted by the world as it allows individuals to “tap and go” limiting the interaction between individuals which has become a need for today’s society.

For MCB the Year 2020 was a year of mega transformational project, the bank introduced the latest secure chip and pin cards with contactless technology to their entire card base along with the migration to a new card management host.

MCB Debit Card offers a rich value proposition to its cardholders offering discounts on lifestyle products and services alongside with round the clock availability of ATMs and POS network. In 2020 the main focus was on introducing discounts on healthcare services and online payments to provide convenience to consumers during COVID 19. With an MCB Debit Card, one can forget the need to carry cash in the new era of a digitalized economy.

### Mobile Banking & Internet Banking

With the proposition “banking anywhere, anytime” MCB Mobile has proven and positioned itself as one of the most successful and highly sought after mobile banking services within a short span of time. MCB provide customers an easy and secure way to transfer money, carry out balance inquiry, check mini-statements, buy top-ups, pay bills and much more with and comfort of their homes. The bank witnessed a substantial increase in Mobile Banking transactions during 2020. With a cumulative number of 500,000+ App downloads the business is geared up to explore new possibilities across different verticals.

MCB Internet Banking is a state-of-the-art online banking platform with a friendly user interface providing a host of functionalities/services. MCB facilitates its customers to manage and control their bank accounts; whenever and wherever they want. During 2020 with COVID-19 lockdown restrictions and initiatives by the regulator, MCB saw substantial growth in Internet banking registrations.

### ATM

ATM network also witnessed steady progression in terms of reach, reliability and transactional volume. MCB’s network now stands at 1400+ ATMs one of the largest national ATM network spread across 500+ cities. MCB Bank has an ATM uptime rate of 98% one of the best across the industry, ensured by the presence of ATM monitoring teams working 24/7 with periodic system checks and timely hardware replacements.

### Card Acquiring (POS)

MCB Bank has a strong Network of approximately 3,000+ POS terminals at key locations across Pakistan. Our Point of Sale (POS) network is fully compliant with EMV & UICC (international safety & quality standards) and accepts Visa, MasterCard, UPI, JCB and Paypak enabled cards from all over the world. The POS Acquiring business continues to grow due to deepening of merchant relationships, round the clock support, increased POS productivity and quality of deployments.

### Internet Acquiring (MCB eGate)

MCB eGate is a world class 3D secure online payment gateway, formed as a result of our partnership with MasterCard International. MCB eGate equips online businesses to accept payments reliably and securely from both credit and debit cards and currently facilitates more than 600+ online merchants, directly and indirectly. The online card acquisition footprint has grown and continues to grow substantially worldwide and MCB Bank is playing an integral part in developing the e-commerce market in the country. Further, to improve online shopping and merchant experience for e-commerce, MCB eGate payment system has now been upgraded from Mastercard Internet Gateway Service (MiGS) to Mastercard Payment Gateway Services (MPGS) which is fast, reliable and supports multiple payment modes. It also comes with the range of other value added features including real time fraud prevention and supports Mobile Commerce.

### MCB Lite

MCB’s branchless banking offers its Lite mobile wallet customers the ability handle their daily transactions and payments in an efficient and real time manner. In 2020 MCB Lite undertook substantial projects with the successful migration of Lite cards to the new Core Management System (CMS) offering chip and pin functionality. Additionally the bank also introduced Lite EMV compliant cards and instant account opening through biometric device. This year branchless banking also saw the addition of reputable national organizations on its funds/salary disbursement portfolio. MCB Lite is all set to explore new avenues while embracing the digital revolution in the banking arena.

## Operations Group

In the backdrop of significant challenges arising from the rapid spread of COVID-19 pandemic, Operations Group has remained steadfast in preserving its objective of strengthening internal controls and improving operational processes through automation and centralization while ensuring strict regulatory compliance. Operations Group has been at the forefront to stand hand-in-hand with the Bank in adapting to the extraordinary circumstances through an unprecedented effort from each and every

member. The Group managed the impact of COVID-19 by making effective social distancing arrangements through splitting teams for ensuring minimum turbulence in service delivery both for internal and external customers.

Priority of the Group continued to be on revitalizing business growth and refining service efficiencies through process automation and digitization. Consequently, functional support was provided in various projects having bank-wide significance including Roshan Digital Accounts, Foreign Exchange Cases Approval Portal and automation & centralization of FCY Term Deposits. Similarly, Operations Group led projects for enhancing system capabilities for Treasury Derivative System and its Product Suite for our overseas outfits. Valuable enhancements were also made in RTGS STP System to support branches meet COVID-19 contingencies through Direct Cheque Deposit Facility, Bulk Payments processing, revamping of remote area clearing protocols and providing comprehensive exception handling mechanism for customer facilitation. In addition, various new Core Banking screens were developed through enhanced Third Party Module Utility for Cash Transactions and Export Advance Payments to allow digitization of manual transactions and automated generation of related reports. Data cleansing exercise also continues to move ahead in full swing and productive results have started to be seen.

Operations Group has provided critical support for successful launch of various Government of Pakistan led projects like Low Cost Housing Finance and Subsidized Housing Finance Products under the Naya Pakistan Housing Scheme, refinance scheme for salary & wages, temporary economic refinance facility and refinance scheme for renewable energy to cater to economic relief for corporate sector. Likewise, launch of other new products has also been facilitated including Auto Fleet Product variant and introduction of new enriched accounts related services at MCB Call Centre through deployment of upgraded Interactive Voice Response (IVR) self-service.

Operations Group has also remained watchful of cost expansion and strived to optimize cost management through the set-up of In-House MCB Print Shop for printing customer account statements and letters in a cost effective manner. There has also been automation in deduction of various service charges including that related to duplicate issuance of payment instruments by providing system based solution thereby minimizing leakage of income and reducing manual workload. Centralized Cheque Clearing protocols were also revisited to change the frequency of delivery for processed cheques wherein a huge amount has been saved.

Keeping its focus on promoting Green Banking, Operations Group has facilitated a number of in-house and external staff trainings virtually. The Business Continuity framework was upgraded for building capability of an effective response to disruptive events and ensuring continuity of critical functions in an event of disaster. Green Office certification was also achieved for an MCB's iconic building i.e. MCB Centre, Lahore and various awareness initiatives were launched for staff and customers on Green Banking. In addition, support was provided to back offices and branches in procurement of COVID-19 related protective gears and arranging fully functional alternate sites for pandemic affected areas.

Operations Group is optimistic about 2021 and believes that 2021 will be the year of transition and recovery. The Group will continue to prioritize its digitization and centralization drive and remain focused on its ongoing cost discipline and proactive engagements with other groups to ensure marked improvements in service delivery and enriched product offerings. Operations Group looks ahead to fully support the Bank in pursuing its business strategy and to contribute in every possible way in its vision of becoming the leading financial services provider.

## Compliance and Controls Group

The Compliance landscape and environment is becoming increasingly complex and challenging owing to enhanced Global focus on risks associated with Money laundering (ML), Terrorist Financing (TF) and Proliferation Financing (PF). Consequently the Compliance function is continuously striving to keep up with these challenges through a well-integrated and robust risk mitigation framework in the aforesaid areas of our banking operations. As heightened focus continues on tackling these issues, CCG is committed towards investing more in resources, processes and technology to combat these and other risk areas.

In order to remain abreast with regulatory requirements, CCG has pursued implementation of various dimensions of Compliance Risk Management (CRM) Guidelines issued by the regulator. In this regard, CCG aims to inculcate a compliance culture in the bank wherein ongoing regulatory requirements and industry challenges can be managed effectively in all jurisdictions of its operations.

CCG aims to ensure the highest standards of AML/CFT/CPF compliance, which requires management and employees to adhere to these standards by preventing use of Bank's delivery channels, products and services for money laundering, terrorist financing and proliferation financing. The Group provides a structural base to enable all concerned stakeholders to monitor out of pattern transactions to detect possible Money Laundering/ Terrorism Financing / Proliferation Financing activities



through Transaction Monitoring Solution (FCCM). Two Management sub-committees namely, AML/CFT sub-committee and Compliance Committee of Management oversee compliance with respect to relevant regulations, policies and procedures and steering of various AML/CFT/CPF initiatives in the Bank, to mitigate the risk of such activities for both domestic and overseas operations. Furthermore, CCG is also challenging all internal stakeholders to strengthen Bank's monitors with regards to ML/TF/PF risk emanating from Trade related business activities.

Highlights of 2020 include successful up gradation of Transaction Monitoring Solution (FCCM), implementation of system for KYC and Risk Profiling of Trade customers and implementation of specially designed SOPs for compliance of SBP's Framework on Trade Based Money Laundering (TBML).

Further, CCG also ensured bank wide training / awareness programs on AML / CFT / CPF for bank's staff all over the country. Moreover, CCG developed a structured model to continuously assess its inherent and residual Terrorism Financing risk based on threats and vulnerabilities. This activity also enables the bank to explore opportunities and strengthen its systems and controls to mitigate the residual risk.

CCG also oversees adherence to the regulatory requirements through onsite reviews, with specific emphasis on AML / CFT. It also performs overall evaluation of bank's Risk Control Self-Assessment (RCSA) Function and provides recommendations to enhance its effectiveness.

CCG ensures a professionally cordial working relationship with State Bank of Pakistan (SBP), Law Enforcement Agencies and other regulatory bodies in addition to coordination of SBP's Inspections. CCG has also been actively involved in pursuing Bank-wide implementation of SBP-led projects to digitize various Banking services and channels to facilitate customers' viz. Roshan Digital Accounts and end-to-end digitization of Foreign Exchange transaction requests of the customers. CCG played a meaningful role in enforcing large number of regulatory instructions issued by the regulator to mitigate the effects of covid-19 in the economy during the year 2020.

The Fraud Risk Management Department (FRMD) within CCG is responsible for mitigating Fraud Risk on pan bank basis. In addition to the management of Branch related fraud cases, FRMD also investigates Consumer & Digital banking related frauds, hence adopting a more focused approach towards managing Fraud risk. Further, Implementation of 'Internal Eye', a tool for reviewing and monitoring of transactions associated with employee

accounts, enabled FRMD to monitor funds trafficking in employees accounts more guardedly. As a result of this, the scope of 'Internal Eye' will also cover the overseas branch going forward. In addition, FRMD is leading Fraud Risk Assessment Exercise Bank wide with an objective to build new controls or reinforcement of existing controls in order to counter the potential frauds and safeguard Bank's interest. Moreover, FRMD also spearheads resolution of regulatory observations through a cross functional Management sub-committee. In compliance with the Regulatory requirements of Employee Due Diligence, FRMD has designed Know Your Employee (KYE) Program, whereby, it also conducts KYE review exercise on quarterly basis by reviewing credentials of newly hired regular employees.

Our Service Quality (SQ) function, which is also part of CCG, continues its enhanced focus and rigor around customer experience through senior management oversight and continuous internal stakeholder engagement. Bank follows a multi-pronged approach to assess the quality of service standards for its customers. These measures include ongoing evaluation of our branch look & feel, speed of our product and service delivery and efficiency of our digital channels. The bank also seeks customer feedback on the same through its in-house Voice of Customer team. Weak areas identified through these initiatives are then worked upon to improve customer experience.

Fair treatment of customers continued to remain a priority agenda item for the bank throughout 2020. In addition to the class room trainings on "Fair Treatment of Customers", an e-learning program was also introduced in 2020 for frontline staff in order to increase staff coverage for this all important training module.

Service Quality function is also the custodian of customers' grievance handling and works in collaboration with all businesses / functions of the bank to ensure that not only customer complaints are managed effectively and efficiently, but also root causes leading to these complaints are eliminated.

## Audit & Risk and Review Group

Internal audit function plays a pivotal role in the overall risk and control environment of any organization. The function provides assurance that is critical to the Board and management in assessing overall strength of an organization's control environment. Furthermore this function also adds value to the aforesaid control environment by virtue of its consultative role.

Audit & Risk Assets Review (Audit & RAR) Group is responsible for the internal audit function within MCB Bank Limited. Chief Internal Auditor functionally reports to the Board's Audit Committee and administratively to

the President. The Group conducts audits/reviews of various areas of the Bank under the globally recognized Risk Based Auditing Methodology whilst complying with the requirements of the International Standards for the Professional Practice of Internal Auditing issued by the Institute of Internal Auditors (USA) (IIA).

Audit & RAR Group continued to perform its role effectively on both the assurance and consultative fronts during 2020. The Group evaluated efficacy of Bank's control systems by enhancing visibility of the management and the Board Audit Committee on the risk management and control related matters of the Bank (for Bank's domestic and overseas operations). The Group also highlighted areas for improvement and worked closely with the management through regular engagement as well as consistent follow-up, monitoring and guidance towards resolution of significant issues. Staff training and development remained a focus area for the Group which helped in enabling the internal audit teams in performance of their duties objectively as well as with professional due care.

With the zeal and commitment to play an effective role in the Bank's endeavor for continuous improvement, Audit & RAR Group will persevere for further strengthening of its resources, processes and Framework in 2021.

## Legal Affairs Group

The mission of the Legal Affairs Group is to further the strategic goals and to protect and preserve the legal, ethical and financial integrity and the reputation of MCB Bank. This is accomplished by providing strategic legal advice on contentious and non-contentious matters, thereby ensuring that businesses conduct their activities in accordance with applicable laws and bye laws consistent with the mission, vision, and values of the MCB Bank. Legal compliance is the process or procedure to ensure that an organization follows relevant laws, regulations and business rules.

Legal Affairs Group comprises of two departments.

- Legal Affairs Department - Advisory
- Litigation Department

### Legal Affairs Department - Advisory

The object of Legal Affairs Department – Advisory is to oversee the identified legal issues in all segments of business and their interrelation with, including marketing, sales, distribution, credit, finance, human resources, as well as corporate governance and business policy. This includes but is not limited to consultancy issues and adherence of processes for collateralization of finances. In this context, the Advisory Department analyses and reviews credits' security documentation of all segments

of the Bank, like Corporate, Commercial, Retail and Consumer Banking and provide advice on perfection of documentation to secure Bank's interest.

At the helms of the affairs, diversity of work is exhaustive and apart from the major chunk of advice on securitization of Collaterals, it also includes review of all sorts of Agreements (Finance Agreements, Service Agreements, IT Agreements, Distributions Agreements, Non-disclosure Agreements, Product Agreements, Lease Agreements, E-Commerce Agreements etc.), Bank Guarantees, Advance Payment Guarantees, Mobilization Advance Payment Guarantees, Foreign Bank Guarantees, Financial Guarantees, LCs / Standby LCs, review of Product Manuals and their processes; SLAs are framed and transformed as per vendor's services across the board.

Corporate opinions are drafted and customer's relationship segments are assisted by review on the status of Corporate bodies, Partnership, Trust, Companies, funds etc. and Foreign Currency matters.

Advisory Department is also supportive by its quick advice and crisis management for queries by law enforcement agencies and public sector financial organizations like FIA/NAB, Anti-Narcotics, Police, Anti-Corruption, NAB, Customs /Income Tax /Sales Tax Departments/FBR etc.

More recently Advisory has also been actively engaged with SBP & PBA with regards to development of various upcoming laws and their amendments. This includes pragmatically reviewing and providing feedback/opinion on upcoming laws and their amendment with a view to secure the future interest of our business.

By standardizing different banking documents, the Legal Affairs Group has helped to introduce symmetry of documentation at all levels. Standardized templates have been uploaded on MCB Portal. Further, newly updated templates are uploaded and shared /exchanged with relevant business for implementation as when there is any amendment in relevant law/regulations etc.

During 2020, around 17,947 Opinions/Vettings were issued on collateral, security documents and allied legal issues raised by Business/Field, therefore advisory department has contributed in cost saving worth Millions of Rupees.

### Litigation Department

The Litigation Department in coordination with businesses, oversees and handles bank wide litigation of different groups working within Bank and other litigation related proceedings pertaining to its customer or employees; Enlists Lawyers on panel in consultation and on the recommendation of relevant business/Group after conducting a detailed scrutiny via market check etc.;

Assigns cases in consultation and on recommendation of relevant business/Group; Negotiates Fee with the assigned lawyers in the cases assigned to them; Evaluates lawyers and their performance in cases assigned to them on bi-annual basis through directly monitoring their performance and on the basis of feedback received from the businesses and presents the same to LRC; Follow ups with businesses and updates centralized data of court cases on the basis of feedback received through court coordinators of respective businesses/Groups; Maintains centralized MIS of Litigation data and disseminates information in advance regarding fixation of cases to relevant business groups on daily basis; Reviews drafts of plaints/Appeals/Applications/FIRs and Settlement/Rescheduling Agreements etc.; Renders opinions on court orders, stay orders, Summons/Warrants etc. as well as notices received from NAB, FIA & other LEAs.

This broad role encompasses Crisis Management for all segments of business for contentious and non-contentious matters of litigation and ancillary matters that arise directly or indirectly due to the litigation.

Following initiatives were taken by the Litigation Department during 2020:

- Retrieval/Compilation of Pan Pakistan Litigation Data/Record & Digitizing/Scanning of the same.
- Since Centralization of litigation expenses in June 2014, complete record with respect to litigation expenses is being maintained & shared with respective businesses on periodical basis.
- Development of Shadow Filing System which is in data entry phase. Once the same will be fully functional, it would enable litigation department to provide real time updates of court cases. It will also help in generating different reports for review of senior management and onward sharing with regulator and other departments/institutions.
- As many as four meetings of Litigation Review Committee (LRC) were held during the year 2020 and in said meetings, twelve (12) lawyers were enlisted on Bank's Approved panel of lawyers.
- The performance of three hundred & ten (310) lawyers was evaluated and discussed during LRC meetings on the basis of feedback received from the relevant businesses.
- In such meetings, the critical cases as well as recovery suits pending for decree for two years or more were discussed & the way forward/strategy for their expeditious disposal was also devised.
- As many as 754 cases, including recovery suits were filed during 2020 whereas 689 cases were disposed of/decreed out of the entire pending Litigation Portfolio as a result of strong follow up with the assigned lawyers which in turn resulted in substantial recovery of Bank's NPLs.

- Moreover, with the dismissal of cases, where damages were claimed against the bank, the bank was able to secure not only a sizeable amount of money but reputation of the bank was also safeguarded.
- Similarly, through the criminal litigation, especially in fraud & forgery incidents, the culprits were brought to book & were compelled to return the embezzled/misappropriated amount and make good the bank's loss.
- A Large number of opinions on different legal matters were rendered in addition to vetting of all the pleadings (plaints, written statements/PLAs, Replications, Criminal Complaints and misc. applications) filed during the year 2020. Besides this, Settlement Agreements to be executed with the Customers/Defaulters were also reviewed/vetted.
- As a result of negotiations with the panel lawyers, a hefty amount was saved on account of professional fee.

To strengthen itself, MCB Legal Affairs Group has shown significant growth in 2020 and is committed to perform up the curve in future to help the Bank to achieve better results.

## Human Resource

MCB Bank follows the philosophy of working as an equal opportunity employer, in true spirit. We believe in initiating steps to foster and maintain a work climate that is conducive to achieving equal employment opportunities while ensuring a workplace free of discrimination and harassment. The bank believes in hiring and retaining talent who can contribute towards the achievement of all defined targets.

The Bank adopts a transparent performance management system developed on a defined KPI based scorecard for various business positions. The scorecard helps management define prioritization vis a vis objectives and setting future goals of its employees. The bank has instituted a Talent Management program with a view to identify high potential individuals and to groom them as future leaders.

The Bank has a vision to provide career progression opportunities to its employees; for this purpose an initiative was taken by the bank to convert a large number of individuals from an outsourced arrangement to Bank's Permanent employment pool. The conversion was also a step towards the fulfilling of several regulatory requirements.

To enhance the knowledge and skillset of its work force, a number of trainings were held during the year. Participants from all over the country were trained through different programs including in-house, ex-house, mobile,

and E-learning training programs. A segment comprising senior management was engaged through a Management Development Program as part of the Talent Management Scheme of the Bank.

## Security

Security Division effectively ensured the safety and security of the Bank's physical assets despite numerous challenges during 2020. Through their persistent coordinated efforts, our security team meticulously managed security arrangements, ensured vigilant monitoring and supervision of branches across Pakistan, which translated into smooth and unimpeded branch operations.

MCB Bank branches are equipped with modern security equipment and manned by adequately skilled security staff that ensures banking transactions by customers and bank staff at branches are conducted in a safe and secure environment.

This year again, the security response rate was commendable, especially during national and other public holidays; all robbery attempts were successfully foiled owing to the robust and efficient security systems deployed at bank branches.

As in previous years, Regional Security Officers conducted security awareness training sessions for branch staff and security guards in their respective regions. With the right combination of trained and motivated man power and technology, Security Division is geared towards ensuring the safety of Bank's customers, assets and staff in the future.

## Marketing Division

The Marketing Division is geared towards enhancing the positive image of the Bank through its corporate Brand Building, promotion of Bank's Product & Services on visible optimized mediums, standardization of corporate & brand communications, branch merchandizing, CSR and strong public relations.

During 2020, Marketing Division launched new TVCs for Roshan Digital Account, MCB Pyara Ghar Scheme and Awareness of Bank Alternate Delivery Channels during COVID19 Pandemic. Significant efforts were also undertaken by team to effectively support key regulator initiatives. The Division also played a pivotal role in providing support to marginalized communities and health workers on the frontlines of the battle against the COVID-19 Pandemic through targeted CSR initiatives. The Marketing Team also successfully managed and executed several internal events, such as the Bank's flagship Annual Sales Conference, its 72nd Anniversary ceremony and the Independence Day Illumination of MCB House in Lahore.

The Team revitalized its efforts to strengthen the Bank's presence on Social Media and used the communication channel effectively to create visibility for strategic brand alliances. The Division also took the initiative of creating tutorial and educational videos to encourage and facilitate the use of its financial solutions and services.

Going forward, Marketing Division will continue to focus on enhancing Brand visibility through a combination of available mediums, to reinforcing brand presence and create greater awareness of the Bank's products and services.

## MCB Islamic Bank Limited

MCB Islamic Bank Limited (the "Bank") is the wholly owned subsidiary of MCB Bank Limited and commenced its operations in 2015 with a nation-wide network of branches.

The aim of MCB Islamic Bank Limited is to be the first choice Shari'ah compliant financial services provider for the customers and to carry out business purely in accordance with Shari'ah principles with full conviction and devotion.

Alhamdulillah, the Bank currently operates to provide Shari'ah compliant value added and innovative banking solutions for customers under the supervision of a Shari'ah Board chaired by the renowned Islamic scholar Professor Mufti Munib-Ur-Rehman.

The Bank focuses on building strong and lasting relationships as well as delivering an experience that satisfies all types of customers across Corporate, Commercial, SME, Consumer, Agriculture and Micro sectors. The Bank offers wide range of Riba Free and Shari'ah compliant products for both personal and business needs.

The Bank is using world's renowned Core Banking Software solution. Different services and products offered by the bank are available to customers through a branch network of 187 branches backed by 188 (176 On-Site and 12 Off-Site) ATMs. The Bank offers EMV enabled Debit Cards, IOS and Android based native Mobile Apps and Internet Banking services. Moreover, the Bank has also developed its suite of Cash Management services, including Payment upon Identification (PUI), Cash & Instrument Collection, Cash in Transit Services (CIT), Corporate Internet Banking by acquiring Oracle Banking Digital Experience (OBDX) and also working on development of product suit for Employee Banking under Cash Management umbrella.

The Bank is committed to share in the mutual benefits with the customers, staff and shareholders who participate in our business success under the highly skilled and seasoned management with the prime objective of ensuring our customers' satisfaction.

## Corporate Governance

Corporate Governance at MCB Bank Limited (“MCB” or the “Bank”) refers to rights and responsibilities among different stakeholders of the Bank through a set of rules, policies and practices keeping focus on proper delegation, transparency and accountability in the organization as a whole. The success of the Bank relies on its proven track record in upholding high standards of corporate governance.

### Board Composition:

The Bank encourages representation of independent directors, non-executive directors and directors representing minority interests on its board of directors. At present the Board includes:

| Category                             | Name                                                                                                                                                                                       |
|--------------------------------------|--------------------------------------------------------------------------------------------------------------------------------------------------------------------------------------------|
| Independent Directors                | Mr. Yahya Saleem<br>Mr. Salman Khalid Butt<br>Mr. Shahzad Hussain<br>Mr. Masood Ahmed Puri                                                                                                 |
| Non-Executive Directors              | Mian Mohammad Mansha<br>Mr. S. M. Muneer<br>Mr. Muhammad Tariq Rafi<br>Mian Umer Mansha<br>Mr. Mohd Suhail Amar Suresh bin Abdullah<br>Mr. Muhammad Ali Zeb<br>Mr. Shariffuddin Bin Khalid |
| Executive Director (President & CEO) | Mr. Imran Maqbool                                                                                                                                                                          |
| Female Director (Non-Executive)      | Mrs. Iqraa Hassan Mansha                                                                                                                                                                   |

### Independent Directors and their Independence:

The Board has four (04) Independent Directors who meet the criteria of independence under the Companies Act, 2017 and the directives issued by the State Bank of Pakistan (“SBP”).

### Representation of Female Directors on Board:

Mrs. Iqraa Hassan Mansha is representing female Director on the Board.

### Non-Executive Directors:

All the directors on the Board are Non-Executive Directors except for the President & CEO of the Bank. The Non-Executive Directors provide an outside viewpoint to the Board of Directors and are not involved in managing the affairs of the Bank.

### Casual Vacancies on to Board of Directors:

No casual vacancy occurred on the Board of Directors during the year 2020.

### Executive director serving as non-executive directors in other companies:

President & CEO, the Executive Director is serving on the Board of three (03) companies as Non-Executive Director.

### Detail of Board Meetings held outside Pakistan:

During the year 2020, all the Board of Directors meetings were held in Pakistan.

## Process of Appointment and Nomination of directors:

As per the provisions of the law, the directors are elected by the shareholders of the Bank, whereas, the casual vacancies on the Board are filled by the directors. Every director has to qualify the prior assessment criteria of 'Fit and Proper Test' as framed by the State Bank of Pakistan. While appointing a director, it is ensured that the Board is comprised of directors who have diversified experience, suitable knowledge, appropriate skill set/expertise and competency considered relevant in the context of the Bank's operations and to make the Board an effective decision making body. It is also ensured that the Board has an appropriate mix of directors including female member(s), diversity, size and well-structured to add value and to provide objective advice and have no material conflicts of interest.

Independent Directors are elected through the process of election of directors and meet the criteria laid down by the State Bank of Pakistan as well as comply with the requirements of the relevant rules and regulations. An independent director means a director who is not connected or does not have any other relationship, whether pecuniary or otherwise, with the company, its associated companies, subsidiaries, holding company or directors; and he can be reasonably perceived as being able to exercise independent business judgment without being subservient to any form of conflict of interest. At present, Independent Directors are selected from the data bank maintained by the Pakistan Institute of Corporate Governance.

## Connection of External Search Consultancy for Selection of Independent Directors

The selection of independent directors as members of the Bank's Board of Directors is carried out from a list maintained by the Pakistan Institute of Corporate Governance ("PICG") under the Companies (Manner and Selection of Independent Directors) Regulations, 2018.

PICG has no other connections with the Bank, except for providing access to the database on independent directors besides directors' training and evaluation of Board and / or individual directors' performance.

## Directors' Participation/Attendance in Board and Committee Meetings held during 2020

| Sr. No.                       | Name of Director                    | Board of Directors |          | Board's Committees |          |        |          |        |          |        |          |        |          |        |          |        |          |        |          |
|-------------------------------|-------------------------------------|--------------------|----------|--------------------|----------|--------|----------|--------|----------|--------|----------|--------|----------|--------|----------|--------|----------|--------|----------|
|                               |                                     | (BoD)              |          | AC                 |          | BS&DC  |          | RM&PRC |          | CR&MC  |          | ITC    |          | HR&RC  |          | PP&CA  |          | WO&WC  |          |
|                               |                                     | Member             | Attended | Member             | Attended | Member | Attended | Member | Attended | Member | Attended | Member | Attended | Member | Attended | Member | Attended | Member | Attended |
| 1                             | Mian Mohammad Mansha                | ◆                  | 5/5      | -                  | -        | ◆      | 4/4      | -      | -        | -      | -        | -      | -        | ◆      | 4/4      | ◆      | 4/4      | -      | -        |
| 2                             | Mr. S. M. Muneer                    | ◆                  | 5/5      | -                  | -        | ◆      | 1/4      | -      | -        | ◆      | 1/4      | -      | -        | -      | -        | -      | -        | -      | -        |
| 3                             | Mr. Muhammad Tariq Rafi             | ◆                  | 5/5      | -                  | -        | -      | -        | -      | -        | -      | -        | -      | -        | -      | -        | -      | -        | ◆      | 2/3      |
| 4                             | Mian Umer Mansha                    | ◆                  | 5/5      | ◆                  | 5/5      | ◆      | 4/4      | ◆      | 5/5      | -      | -        | ◆      | 5/5      | -      | -        | ◆      | 4/4      | ◆      | 3/3      |
| 5                             | Mrs. Iqraa Haasan Mansha            | ◆                  | 3/5      | -                  | -        | -      | -        | -      | -        | -      | -        | -      | -        | ◆      | 2/4      | ◆      | 1/4      | -      | -        |
| 6                             | Mr. Muhammad Ali Zeb                | ◆                  | 5/5      | ◆                  | 5/5      | -      | -        | ◆      | 5/5      | ◆      | 4/4      | -      | -        | ◆      | 3/4      | ◆      | 3/4      | ◆      | 3/3      |
| 7                             | Mr. Mohd Suhail Amar Suresh         | ◆                  | 5/5      | -                  | -        | ◆      | 4/4      | ◆      | 5/5      | -      | -        | ◆      | 5/5      | -      | -        | -      | -        | -      | -        |
| 8                             | Mr. Yahya Saleem                    | ◆                  | 5/5      | -                  | -        | -      | -        | -      | -        | -      | -        | ◆      | 2/5      | ◆      | 3/4      | -      | -        | -      | -        |
| 9                             | Mr. Salman Khalid Butt              | ◆                  | 5/5      | -                  | -        | ◆      | 4/4      | ◆      | 5/5      | ◆      | 4/4      | ◆      | 5/5      | -      | -        | -      | -        | -      | -        |
| 10                            | Mr. Shahzad Hussain                 | ◆                  | 5/5      | ◆                  | 5/5      | -      | -        | -      | -        | -      | -        | -      | -        | -      | -        | -      | -        | -      | -        |
| 11                            | Mr. Masood Ahmed Puri               | ◆                  | 5/5      | -                  | -        | ◆      | 4/4      | -      | -        | -      | -        | -      | -        | -      | -        | -      | -        | -      | -        |
| 12                            | Mr. Sharifuddin Bin Khalid          | ◆                  | 5/5      | ◆                  | 5/5      | -      | -        | -      | -        | -      | -        | -      | -        | -      | -        | -      | -        | -      | -        |
| 13                            | Mr. Imran Maqbool (President & CEO) | ◆                  | 5/5      | -                  | -        | ◆      | 4/4      | ◆      | 5/5      | ◆      | 4/4      | ◆      | 5/5      | -      | -        | ◆      | 4/4      | -      | -        |
| Total Number of Meetings Held |                                     | 5                  |          | 5                  |          | 4      |          | 5      |          | 4      |          | 5      |          | 4      |          | 4      |          | 3      |          |

Chairman ◆ Member ◆

|                    |                                              |
|--------------------|----------------------------------------------|
| <b>AC:</b>         | Audit Committee                              |
| <b>BS&amp;DC:</b>  | Business Strategy & Development Committee    |
| <b>RM&amp;PRC:</b> | Risk Management & Portfolio Review Committee |
| <b>HR&amp;RC:</b>  | Human Resource & Remuneration Committee      |

|                   |                                                           |
|-------------------|-----------------------------------------------------------|
| <b>ITC:</b>       | Information Technology Committee                          |
| <b>PP&amp;CA:</b> | Committee on Physical Planning & Contingency Arrangements |
| <b>CR&amp;MC:</b> | Compliance Review & Monitoring Committee                  |
| <b>WO&amp;WC:</b> | Write-Off & Waiver Committee                              |

**The names of the persons who, at any time during the financial year, were directors of the Bank:**

|                            |                                            |
|----------------------------|--------------------------------------------|
| • Mian Mohammad Mansha     | • Mr. Mohd Suhail Amar Suresh bin Abdullah |
| • Mr. S. M. Muneer         | • Mr. Yahya Saleem                         |
| • Mr. Muhammad Tariq Rafi  | • Mr. Salman Khalid Butt                   |
| • Mian Umer Mansha         | • Mr. Shahzad Hussain                      |
| • Mrs. Iqraa Hassan Mansha | • Mr. Masood Ahmed Puri                    |
| • Mr. Muhammad Ali Zeb     | • Mr. Shariffuddin Bin Khalid              |

**Disclosure on Board of Directors**

| Sr. No. | Name of Directors           | Date of Joining/ Leaving the Board            | Status of Director     | Member of Board Committees*                                  | Number | Name of Companies                                                                                                                                                                                                                                                                                                                                                                                                       |
|---------|-----------------------------|-----------------------------------------------|------------------------|--------------------------------------------------------------|--------|-------------------------------------------------------------------------------------------------------------------------------------------------------------------------------------------------------------------------------------------------------------------------------------------------------------------------------------------------------------------------------------------------------------------------|
| 1       | Mian Mohammad Mansha        | Apr-91                                        | Non-Executive Director | - HR&RC<br>- BS&DC<br>- PP&CA                                | 1      | MCB Non-Bank Credit Organization, CJSC, Azerbaijan (Formerly: MCB Leasing CJSC, Azerbaijan)                                                                                                                                                                                                                                                                                                                             |
| 2       | Mr. S. M. Muneer            | Apr-91                                        | Non-Executive Director | - BS&DC<br>- CR&MC                                           | 5      | Din Textile Mills Limited<br>Din Leather (Pvt.) Limited<br>Din Farm Products (Pvt.) Limited<br>Arabian Sea Country Club<br>Din Industries Limited                                                                                                                                                                                                                                                                       |
| 3       | Mr. Muhammad Tariq Rafi     | Apr-91                                        | Non-Executive Director | - WO&WC                                                      | 5      | Siddiqsons Limited<br>Siddiqsons Tin Plate Limited<br>Central Depository Co. of Pakistan Limited<br>Triple Tree Associates<br>Siddiqsons Energy Limited                                                                                                                                                                                                                                                                 |
| 4       | Mian Umer Mansha            | 11-Nov-97/<br>08-Sep-2007<br>&<br>27-Mar-2009 | Non-Executive Director | - AC<br>- BS&DC<br>- RM&PRC<br>- PP&CA<br>- ITC<br>- WO&WC   | 11     | Nishat Mills Limited<br>Adamjee Insurance Company Limited<br>Adamjee Life Assurance Company Limited<br>Nishat Hotels & Properties Limited<br>Nishat Developers (Pvt.) Limited<br>Nishat (Raiwind) Hotels and Properties Limited<br>Nishat Dairy (Pvt.) Limited<br>Nishat Agriculture Farming (Pvt.) Limited<br>Hyundai Nishat Motor (Pvt.) Limited<br>Nishat Agrotech Farms (Pvt) Limited<br>Nishat Sutas Dairy Limited |
| 5       | Mrs. Iqraa Hassan Mansha    | 03-May-16                                     | Non-Executive Director | - HR&RC<br>- PP&CA                                           | 4      | Nishat Hotels & Properties Limited<br>Nishat (Raiwind) Hotels and Properties Limited<br>Nishat Real Estate Development Company (Private) Limited<br>Emporium Properties (Pvt) Limited                                                                                                                                                                                                                                   |
| 6       | Mr. Muhammad Ali Zeb        | 27-Mar-09/07-Apr-2011 & 17-Jun-2013           | Non-Executive Director | - AC<br>- RM&PRC<br>- HR&RC<br>- CR&MC<br>- PP&CA<br>- WO&WC | 3      | Adamjee Insurance Company Limited<br>Adamjee Life Assurance Company Limited<br>Nishat Sutas Dairy Limited                                                                                                                                                                                                                                                                                                               |
| 7       | Mr. Mohd Suhail Amar Suresh | 24-Feb-14                                     | Non-Executive Director | - RM&PRC<br>- BS&DC<br>- ITC                                 | 3      | Maybank Shared Services Sdn Bhd<br>MBB Labs Pvt Ltd<br>Technology Park Malaysia Corporation Sdn Bhd (TPM)                                                                                                                                                                                                                                                                                                               |

| Sr. No. | Name of Directors                 | Date of Joining/ Leaving the Board | Status of Director                 | Member of Board Committees*                        | Number | Name of Companies                                                |
|---------|-----------------------------------|------------------------------------|------------------------------------|----------------------------------------------------|--------|------------------------------------------------------------------|
| 8       | Mr. Yahya Saleem                  | 27-Mar-18                          | Non-Executive Independent Director | - HR&RC<br>- ITC                                   | 6      | Saleem Memorial Trust Hospital                                   |
|         |                                   |                                    |                                    |                                                    |        | NC Entertainment Private Limited                                 |
|         |                                   |                                    |                                    |                                                    |        | NC Trading USA                                                   |
|         |                                   |                                    |                                    |                                                    |        | YSG Trading Private Limited                                      |
|         |                                   |                                    |                                    |                                                    |        | YSG Services Canada                                              |
|         |                                   |                                    |                                    |                                                    |        | YSG Services Private Limited                                     |
| 9       | Mr. Salman Khalid Butt            | 10-Nov-18                          | Non-Executive Independent Director | - BS&DC<br>- RM&PRC<br>- CR&MC<br>- ITC            | 4      | Saleem Memorial Trust Hospital                                   |
|         |                                   |                                    |                                    |                                                    |        | New Heights Management Ltd, a BVI Company                        |
|         |                                   |                                    |                                    |                                                    |        | New Heights Concepts Ltd, a BVI Company                          |
|         |                                   |                                    |                                    |                                                    |        | Next Commercial FZ LLC, a Ras El Khaimah (Rakez), U.A.E. Company |
| 10      | Mr. Shahzad Hussain               | 31-May-19                          | Non-Executive Independent Director | - AC                                               | 2      | NAMAL Education Foundation                                       |
|         |                                   |                                    |                                    |                                                    |        | Punjab Health Care Commission                                    |
| 11      | Mr. Masood Ahmed Puri             | 31-May-19                          | Non-Executive Independent Director | - BS&DC                                            | 3      | Transarab Trading Services (KSA)                                 |
|         |                                   |                                    |                                    |                                                    |        | Jedex Logistics Pvt. Ltd (Pakistan)                              |
|         |                                   |                                    |                                    |                                                    |        | Jedex Transport Company LLC (UAE)                                |
| 12      | Mr. Shariffuddin Bin Khalid       | 23-Jul-19                          | Non-Executive Director             | - AC                                               | 8      | Malayan Banking Berhad                                           |
|         |                                   |                                    |                                    |                                                    |        | Maybank (Cambodia) Plc                                           |
|         |                                   |                                    |                                    |                                                    |        | Maybank Islamic Berhad                                           |
|         |                                   |                                    |                                    |                                                    |        | Marine & General Berhad                                          |
|         |                                   |                                    |                                    |                                                    |        | M&G Marine Logistics Holdings Sdn. Bhd.                          |
|         |                                   |                                    |                                    |                                                    |        | M&G Tankers Sdn. Bhd.                                            |
|         |                                   |                                    |                                    |                                                    |        | Jasa Marin (Labuan) Plc                                          |
|         |                                   |                                    |                                    |                                                    |        | M&G Ship Management (L) Pte Limited                              |
| 13      | Mr. Imran Maqbool President & CEO | 21-Dec-12                          | Executive Director                 | - BS&DC<br>- RM&PRC<br>- CR&MC<br>- ITC<br>- PP&CA | 3      | Adamjee Insurance Company Limited                                |
|         |                                   |                                    |                                    |                                                    |        | Adamjee Life Assurance Company Limited                           |
|         |                                   |                                    |                                    |                                                    |        | MCB Employees Foundation                                         |

|                    |                                              |
|--------------------|----------------------------------------------|
| <b>AC:</b>         | Audit Committee                              |
| <b>BS&amp;DC:</b>  | Business Strategy & Development Committee    |
| <b>RM&amp;PRC:</b> | Risk Management & Portfolio Review Committee |
| <b>HR&amp;RC:</b>  | Human Resource & Remuneration Committee      |

|                   |                                                           |
|-------------------|-----------------------------------------------------------|
| <b>ITC:</b>       | Information Technology Committee                          |
| <b>PP&amp;CA:</b> | Committee on Physical Planning & Contingency Arrangements |
| <b>CR&amp;MC:</b> | Compliance Review & Monitoring Committee                  |
| <b>WO&amp;WC:</b> | Write-Off & Waiver Committee                              |



## Board Committees

The Board has formed eight (8) sub-committees as given below:

1. Audit Committee;
2. Business Strategy & Development Committee;
3. Risk Management & Portfolio Review Committee;
4. Compliance Review & Monitoring Committee;
5. Information Technology Committee;
6. Human Resource & Remuneration Committee;
7. Committee on Physical Planning & Contingency Arrangements; and
8. Write-Off & Waiver Committee.

### Audit Committee

#### Composition:

1. Mr. Shahzad Hussain - (Chairman, Independent Director)
2. Mian Umer Mansha - (Non-Executive Director)
3. Mr. Muhammad Ali Zeb - (Non-Executive Director)
4. Mr. Shariffuddin Bin Khalid - (Non-Executive Director)

#### Terms of Reference

The main Terms of Reference/ roles & responsibilities of the Committee are:

1. Determination of appropriate measures to safeguard the bank's assets;
2. Reviewing annual and interim financial statements of the bank, prior to their approval by the Board of Directors, focusing on:
  - Major judgmental areas;
  - Significant adjustments resulting from the audit;
  - The going concern assumption;
  - Any changes in accounting policies and practices;
  - Compliance with applicable accounting standards;
  - Compliance with listing regulations, other Statutory and regulatory requirements; and
  - All related party transactions.
3. Reviewing preliminary announcements of results prior to external communication and publication;
4. Facilitating the external audit and discussion with external auditors of major observations arising from interim and final audits and any matter that the auditors may wish to highlight (in the absence of management, where necessary);
5. Reviewing Management Letter issued by External Auditors and management's response thereto;
6. Ensuring coordination of internal auditors with external auditors of the Bank and SBP inspection team(s);
7. Making recommendations to the Board of Directors for the appointment of external auditors, their removal, audit fees, the provision of any service permissible to be rendered to the Bank by the external auditors in addition to audit of its financial statements, measures for redressal and rectification of non-compliances with the Regulations. The Board shall give due consideration to the recommendations of the audit committee and where it acts otherwise it shall record the reasons thereof;
8. Reviewing and recommending of the Internal Audit Framework i.e. internal audit function's policies and manuals (also covering extent and nature of assignments/ engagements that can be provided to the management by internal audit function in its 'Advisory / Consulting' role) to the Board for approval.
9. Reviewing, internal audit strategy, reporting framework and procedures developed by Chief Internal Auditor and ensuring its fullest support to the internal audit function and internal auditors enabling them in performing their mandated activities independently and in objective manner;
10. Reviewing and approving scope and extent of internal audit as well as risk based annual audit plan. Furthermore, reviewing the implementation status of the approved audit plan on a quarterly basis.
11. Ensuring that the internal audit function has adequate resources (financial, human, operational, physical and technological), its staff is adequately trained and the function is appropriately placed within the bank with access to Bank's people, information, processes, properties, records and systems;
12. Ensuring independence of internal audit function, independence & objectivity of internal auditors, optimal utilization of audit resources, effectiveness of the internal audit function in Bank's overall governance and internal control framework and constructive engagement of internal audit function with senior management and auditee units etc.;
13. Reviewing and recommending budget / resource requirement of Audit & RAR Group to the Board for approval. Further, reviewing, on a quarterly basis, the utilization of Audit & RAR Group's assigned budget and if required, recommending provision of additional resource(s) to enable the Group in performance of its activities;
14. Formulating 'Key Performance Indicators' (KPIs) for the Chief Internal Auditor and evaluate his/her performance against set KPIs on an annual basis;
15. Approving appointment/ re-hiring/ renewal of contract and removal of Chief Internal Auditor along with his/her compensation package/remuneration (including performance based bonus, increments, cash rewards etc.), allied benefits (both financial/non-financial), promotion/demotion and other terms of employment to the Board through Board's Human

Resources & Remuneration Committee. However, recommendation of Board's Human Resource & Remuneration Committee may be sought by the Audit Committee/ Board regarding compensation package of Chief Internal Auditor, keeping in view the institution-wide remuneration policy, formulated in terms of BPRD Circular No. 01 of 2017;

16. Consideration of major findings of internal investigations of activities characterized by fraud, corruption and abuse of power and management's response thereto;
17. Reviewing summaries of quarterly report on frauds/ forgeries/ dacoities;
18. Reviewing, on quarterly basis, summary of significant violations/observations, internal control deficiencies, organizational and personal material conflicts of interest etc. to have deep insights into state of internal controls and to set specific, time bound action points/indicators to monitor improvements. Further reviewing the management action plan to ensure that audit observations/ recommendations receive proper and timely attention by senior management;
19. Analyzing and identifying (for necessary action(s)), on a regular basis, 'root cause(s)' of control breaches of critical nature that keep on occurring in at-least two audit periods despite implementation of audit recommendations;
20. Obtaining Chief Internal Auditor's independent annual assessment/opinion on the state of Bank's internal controls based on the audits conducted over the period;
21. Ascertaining that the internal control systems including financial and operational controls, accounting systems for timely and appropriate recording of purchases and sales, receipts and payments, assets and liabilities and the reporting structure are adequate and effective;
22. Reviewing the Bank's statement on internal control systems prior to endorsement by the Board of Directors and internal audit reports;
23. Instituting special projects, value for money studies or other investigations on any matter specified by the Board of Directors, in consultation with the Chief Executive Officer ("CEO") and to consider remittance of any matter to the external auditors or to any other external body;
24. Determination of compliance with relevant statutory requirements;
25. Establishing, maintaining and promoting regular communication with senior management regarding deficiencies in internal controls; review actions taken by management to address identified deficiencies and ascertaining new developments to achieve a uniform organization-wide commitment/ buy-in for implementation of strong and effective internal controls;
26. Reviewing effectiveness of Whistle Blowing procedures for receiving (through internal or external sources) complaints/concerns regarding business ethics/conduct practices, governance & risk management practices, controls over financial reporting, auditing practices etc. Ensuring that such complaints / concerns are treated confidentially and that the reporting employee(s) are protected and not penalized in any manner whatsoever. Ensuring that employees remain aware of existence of such procedures including mechanism for utilizing them and are encouraged to be a 'whistleblower';
27. Review of arrangement for staff and management to report to audit committee in confidence, concerns, if any, about actual or potential improprieties in financial and other matters and recommend instituting remedial and mitigating measures;
28. Reviewing, on a periodic basis, the Internal Controls over Financial Reporting (ICFR) system for its effective implementation and its continuous up gradation.
29. Monitoring compliance with the Listed Companies (Code of Corporate Governance) Regulations, 2019 and identification of significant violations thereof;
30. Consideration of any other issue or matter as may be assigned by the Board of Directors.

#### **Business Strategy & Development Committee**

##### **Composition:**

1. Mian Umer Mansha - (Chairman, Non-Executive Director)
2. Mian Mohammad Mansha - (Non-Executive Director)
3. Mr. S. M. Muneer -(Non-Executive Director)
4. Mr. Mohd Suhail Amar Suresh - (Non-Executive Director)
5. Mr. Salman Khalid Butt - (Independent Director)
6. Mr. Masood Ahmed Puri - (Independent Director)
7. President & CEO - (Executive Director)

##### **Terms of Reference**

The main Terms of Reference of the Committee are to:

1. Review and develop Vision & Mission statements and core values for MCB both from long and short term perspective.
2. Develop Bank's initiatives relating to business philosophy and acquisition, strategic investment and divestment, capital raising exercise, strategic alliances and brand management. In particular, review the following important matters:
  - a. Policy initiatives;
  - b. Business organization;
  - c. Oversee expansion plans; and
  - d. Contingency planning relating to business realignment.

3. Review and devise medium and long term business plans and policies based on strategy, future direction and milestones set by the Board.
4. Monitor the progress of the key strategy initiatives undertaken by the Bank.
5. Keep oversight on Bank's Overseas Operations.
6. Undertake such other tasks as may be delegated by the Board from time to time.

### **Risk Management & Portfolio Review Committee**

#### **Composition:**

1. Mr. Muhammad Ali Zeb - (Chairman, Non-Executive Director)
2. Mian Umer Mansha - (Non-Executive Director)
3. Mr. Mohd Suhail Amar Suresh - (Non-Executive Director)
4. Mr. Salman Khalid Butt - (Independent Director)
5. President & CEO - (Executive Director)

#### **Terms of Reference**

The main Terms of Reference of the Committee are to:

1. Review the Bank's Risk Management Framework, in light of internal developments, guidelines issued by the regulators and international best practices, on an as and when required basis and recommend to the Board for approval;
2. Ensure Bank's compliance towards Capital Adequacy and other related Basel/ regulatory requirements on an on-going basis. Review Capital Adequacy Ratio (CAR) in detail on half yearly basis;
3. Review and recommend to Board, Bank's Risk Appetite Statement on an annual basis;
4. Review various reports pertaining to the risk in the bank's portfolio prepared by the Risk Management Group. The Committee shall also consider comments of the relevant senior management official/ Committee while reviewing such reports and communicate the planned/executed corrective actions to the Board, if required;

### **Compliance Review & Monitoring Committee**

#### **Composition:**

1. Mr. S. M. Muneer - (Chairman, Non-Executive Director)
2. Mr. Muhammad Ali Zeb - (Non-Executive Director)
3. Mr. Salman Khalid Butt - (Independent Director)
4. President & CEO - (Executive Director)

#### **Terms of Reference**

The main Terms of Reference of the Committee are:

1. To review six monthly reports, prepared by the Compliance & Controls Group and routed through the President, on overall compliance risk management in the Bank (local as well as overseas operations)

including the actions taken on the recommendations and observations of SBP in its Annual/Thematic Inspection Reports;

2. To evaluate the effectiveness of the Bank's overall management of compliance risk, at least annually; keeping in view the regulatory observations in on-site examinations, regulatory enforcement actions, internal assessments/feedback from internal audit, compliance reviews, as well as interactions with the Chief Compliance Officer ("CCO");
3. To carry on liaison between the Board and the management and make recommendations to the Board, if necessary, for taking decisions on expedient and appropriate disposal of compliance issues raised through Compliance Committee of Management ("CCM") and SBP's inspection reports and other AML/CFT related identified issues;
4. To oversee the effectiveness of Service Quality function of the Bank and to review the Bank's performance against committed service deliverables.
5. To review/recommend Compliance Risk Strategy/ Policy, Compliance Program and allied policies and oversee its implementation across the Bank in letter and spirit;
6. To recommend appointment of CCO on the advice of the President and ensure that position of CCO does not remain vacant for more than 60 days. Furthermore, to approve any disciplinary action or termination of the CCO;
7. To ensure that CCO has appropriate stature, authority, resources (physical, financial and human), support to fulfill his duties, independence and capacity to offer his objective opinions and advise to senior management and Board on matters of compliance risks;
8. To ensure that Compliance Function ("CCG") has subject experts on various critical areas such as risk management, credit operations, product compliance, customer service, international trade, outsourcing, corporate governance, financial disclosures, business continuity, information technology, general banking operations, AML/CFT etc. to provide guidance to business areas as and when required.
9. To ensure that Compliance Function ("CCG"), being the second line of defence, assists line managers/ departments in designing and implementing adequate controls to manage risks of non-compliance and monitors and assesses bank-wide compliance risk and reports risk profile to Board and Compliance Committee of Management.
10. To engage with the CCO on half yearly basis, for his feedback on issues faced by the Compliance Function ("CCG") in the implementation of board approved compliance program;

11. To review the minutes of Compliance Committee of Management (CCM) meetings to ascertain its effectiveness in managing compliance risk;
12. To review the progress in implementing remedial actions taken with respect to instances of non-compliance or control weakness as identified by Compliance Function through its regular compliance reviews and / or various other sources;
13. To review the compliance risk relevant agenda items as required under SBP regulations/ instructions of overseas jurisdictions, AML/CFT perspective and SBP inspection reports' observations as per their respective timelines/ frequencies (quarterly, semi-annually or annually);
14. To satisfy itself of receiving the accurate as well as comprehensive information required to perform its compliance risk oversight responsibilities, including seeking assurances from Senior Management that the compliance risk controls have been implemented and are working effectively;
15. To ensure changes in the Rules/Regulations and Laws are reviewed on an ongoing basis in the existing policies or through introduction of new policies.
16. The Committee would recommend to the Management for updation of existing policies of the Bank's local and overseas operations, if required, and/or determine the need for introduction of new policies, in accordance with the changes in the following:
  - a. Local laws, including but not limited to the SBP Act, Banking Companies Ordinance, Prudential Regulations, Code of Corporate Governance, Securities & Exchange Commission of Pakistan Instructions, Rules, Regulations & Circulars and Listing Regulations of Stock Exchanges;
  - b. Existing and prospective business environment; and
  - c. Operational requirements.
17. Any other issue that is deemed necessary and required by the regulations.

#### Information Technology Committee

##### Composition:

1. Mian Umer Mansha - (Chairman, Non-Executive Director)
2. Mr. Yahya Saleem - (Independent Director)
3. Mr. Mohd Suhail Amar Suresh - (Non-Executive Director)
4. Mr. Salman Khalid Butt - (Independent Director)
5. President & CEO - (Executive Director)

##### Terms of Reference

The main Terms of Reference of the Committee are:

1. To approve an overall plan for IT system for the Bank, prepared by the management;

2. To approve the organizational IT and Digital strategic plans to ensure an effective use of information technology and digital initiatives in the Bank by all Departments;
3. To approve and oversee the management's program to automate the organization's use of internal information to ensure that data is organized and shared in a manner that adds value and enhances productivity;
4. To approve and oversee a reliable and secure information security infrastructure with the capacity to address future threats;
5. To approve policies that promote development of information technology and Digital resources in an organized, deliberate, secured, and cost effective manner;
6. To review and approve management recommendations for IT standards for ensuring compliance with regulatory requirements and identifying and mitigating significant IT related risks;
7. To review and approve the technology procurements as per Bank's approved IT Strategy. The Committee may further delegate the same to the management as and when deemed fit;
8. To undertake any other IT or Digital Banking related work assigned to the Committee by the Board.

#### Human Resource & Remuneration Committee

##### Composition:

1. Mr. Yahya Saleem - (Chairman, Independent Director)
2. Mian Mohammad Mansha - (Non-Executive Director)
3. Mrs. Iqraa Hassan Mansha - (Non-Executive Director)
4. Mr. Muhammad Ali Zeb - (Non-Executive Director)

##### Terms of Reference

The main Terms of Reference of the Committee shall be to ensure that:

1. The existing policies are reviewed periodically and as necessary, revised and recommended to the Board, in order to attract and retain highly qualified employees. This may include review of remuneration policy and remuneration setting mechanism at least once every three years. Among other factors, the review of remuneration framework shall include, but not limited to:
    - a. The effectiveness of remuneration policy and mechanism i.e., whether it is providing the expected outcomes;
    - b. Any necessary changes required; and
    - c. Any unintended consequences.
- The findings of review and rectification measures shall be presented to the Board for approval.

2. The latest entry-level procedures are put in place for recruitment of entrants.
3. The existing training facilities for the new entrants as well as for up-gradation of skill level of all employees are reviewed and revised, if required.
4. Proper classification & reclassification of employees' pay scales, job description and methods of their periodical review are put in place.
5. The Bank-wide remuneration policy takes into account all cadres of employees along with the pay-gap between the highest paid and the lowest paid employees, across various levels as well as across the Bank. The pay-gap shall be based on the total compensation awarded to the employees and should be maintained at reasonable levels without allowing concentration of the benefits of Bank's performance only to top level or certain class or group of employees. The pay structure for all employees should be fair, competitive and encourage performance and motivation.
6. That the remuneration policy of the Bank provides for reasonable levels of compensation for contractual employees of Bank and commensurate with their assignments.
7. That a separate structure of remuneration for Material Risk Controllers ("MRC") and Material Risk Takers ("MRTs") is developed as per remuneration policy. The MRTs should be identified as functions and designations rather than as individuals. The MRTs should have appropriate level of authority and control.
8. An objective criterion for work appraisal/performance is developed and linked with the annual merit increase.
9. A review is undertaken of the organizational structure to bring it in line with business strategy & development plan and approve an organizational set up or any revision in the existing set up taking into account the recommendations of the President & CEO.
10. An in-house human resource expertise is developed to undertake market analysis of above policies with a view to developing MCB policies.
11. If so required, the Committee can seek independent external advice/expert opinion for accomplishment of devising an effective and prudent remuneration framework.
12. Effective management information system is developed to monitor the implementation of policies as approved by the Board.
13. Recommendation to the Board for consideration and approval of a policy framework for determining remuneration of directors (both executive and non-executive directors) and members of Senior Management. The definition of senior management will be determined by the Board which shall normally include the first layer of management below the Chief Executive Officer.
14. Selection, evaluation, compensation (including retirement benefits) and succession planning of the CEO, COO, CFO, Company Secretary and Head of Internal Audit and recommendation to the Board.
15. The structure of compensation package of Executive Directors, CEO, Key Executives and any other employee or group of employees Bank-wide is recommended to the Board for its own approval or approval of the shareholders, according to legal and regulatory requirements.
16. The consideration and approval on recommendations of CEO on such matters for key management positions who report directly to CEO.
17. In devising the Remuneration setting policy and mechanism, the Committee can also seek internal inputs from any other Committee of the Board or directly from any department or official of the Bank.

#### **Committee on Physical Planning & Contingency Arrangements**

##### **Composition:**

1. Mian Umer Mansha - (Chairman, Non-Executive Director)
2. Mian Muhammad Mansha - (Non-Executive Director)
3. Mrs. Iqraa Hassan Mansha - (Non-Executive Director)
4. Mr. Muhammad Ali Zeb - (Non-Executive Director)
5. President & CEO - (Executive Director)

##### **Terms of Reference**

The main Terms of Reference of the Committee are:

1. To develop and devise an overall plan for physical infrastructure and contingency arrangements for the Bank;
2. To review and monitor all work in progress, including construction of premises and renovations, which shall, inter alia, be based on physical planning;
3. To review, monitor and recommend to the Board the building plans, master development agreements & contingency arrangements;
4. To review, from time to time, as the Committee deems appropriate, the administrative structures and plans in place to ensure the ongoing health and safety of utilities and physical assets, including land & buildings and recommend, as appropriate, changes in plans arising from this review;
5. To review updates on Bank's property purchases.

#### **Write-Off & Waiver Committee**

##### **Composition:**

1. Mian Umer Mansha - (Chairman, Non-Executive Director)
2. Mr. Muhammad Tariq Rafi - (Non-Executive Director)
3. Mr. Muhammad Ali Zeb - (Non-Executive Director)

### Terms of Reference

The main Terms of Reference of the Committee are:

1. To review and approve write-off & waiver cases on behalf of the Board of Directors and;
2. To submit cases of write-off & waiver for post facto ratification by the Board.

## Management Committees

### Management committee

1. Mr. Imran Maqbool - Chairman
2. Mr. Malik Abdul Waheed
3. Mr. Hammad Khalid
4. Mr. Kamran Zaffar Muggo
5. Mr. Farid Ahmad
6. Mr. Usman Hassan
7. Mr. Muhammad Nauman Chughtai
8. Mr. Syed Mudassar Hussain Naqvi
9. Mr. Zargham Khan Durrani
10. Mr. Abrar Aleem
11. Mr. Hassan Nawaz Tarar
12. Mr. Shahzad Ishaq
13. Mr. Salman Y Zaidi
14. Mr. Shoaib Mumtaz

### Purchase & Expense Committee

1. Mr. Kamran Zaffar Muggo
2. Mr. Hammad Khalid
3. Mr. Hassan Nawaz Tarar
4. Mr. Usman Hassan

### Assets & Liabilities Committee

1. Mr. Imran Maqbool - Chairman
2. Mr. Hammad Khalid
3. Mr. Muhammad Nauman Chughtai
4. Mr. Salman Y Zaidi
5. Mr. Kamran Zaffar Muggo
6. Mr. Zargham Khan Durrani
7. Mr. Shahzad Ishaq
8. Mr. Shoaib Mumtaz

### Write off Committee

1. Mr. Imran Maqbool - Chairman
2. Mr. Hammad Khalid
3. Mr. Muhammad Nauman Chughtai
4. Mr. Zargham Khan Durrani
5. Mr. Shoaib Mumtaz
6. Mr. Omair Safdar
7. Mr. M. Haris Hasan
8. Mr. Muhammad Ali

### Investment Committee

1. Mr. Imran Maqbool - Chairman
2. Mr. Omair Safdar
3. Mr. Salman Y Zaidi

4. Mr. Hammad Khalid
5. Mr. Muhammad Nauman Chughtai
6. Mr. Shoaib Mumtaz

### IT Steering Committee

1. Mr. Imran Maqbool - Chairman
2. Mr. Hammad Khalid
3. Mr. Muhammad Nauman Chughtai
4. Mr. Kamran Zaffar Muggo
5. Mr. Zargham Khan Durrani
6. Mr. Abrar Aleem
7. Mr. Shoaib Mumtaz

### Disciplinary Action Committee

1. Mr. Usman Hassan - Chairman
2. Mr. Kamran Zaffar Muggo
3. Mr. Farid Ahmad
4. Mr. Muhammad Nauman Chughtai
5. Mr. Hassan Nawaz Tarar

### Litigation Review Committee

1. Mr. Syed Mudassar Hussain Naqvi - Chairman
2. Mr. Malik Abdul Waheed
3. Mr. M. Haris Hasan
4. Mr. Muhammad Ali
5. Mr. Zargham Khan Durrani
6. Mr. Shahzad Ishaq
7. Mr. Usman Hassan
8. Mr. Mansoor Qadir
9. Mr. Amir Nawab

### Management Credit & Risk Committee

1. Mr. Imran Maqbool - Chairman
2. Mr. Muhammad Nauman Chughtai
3. Mr. Rizwan Chughtai – Acting member

### Overseas Monitoring Committee

1. Mr. Malik Abdul Waheed - Chairman
2. Mr. Hammad Khalid
3. Mr. Muhammad Nauman Chughtai
4. Mr. Farid Ahmad
5. Mr. Kamran Zaffar Muggo
6. Mr. Shoaib Mumtaz

### Compliance Committee of Management

1. Mr. Imran Maqbool - Chairman
2. Mr. Farid Ahmad
3. Mr. Malik Abdul Waheed
4. Mr. Kamran Zaffar Muggo
5. Mr. Usman Hassan
6. Mr. Muhammad Nauman Chughtai
7. Mr. Syed Mudassar Naqvi
8. Mr. Zargham Khan Durrani
9. Mr. Abrar Aleem
10. Mr. Shoaib Mumtaz

11. Mr. Shahzad Ishaq

#### **Cyber Security Committee**

1. Mr. M. Nauman Chughtai - Chairman
2. Mr. Shahzad Ishaq
3. Mr. Farid Ahmad
4. Mr. Abrar Aleem
5. Mr. Kamran Zaffar Muggo
6. Mr. Shoaib Mumtaz
7. Mr. Zargham Khan Durrani

#### **Outsourcing Relationship Review Committee**

1. Mr. Kamran Zaffar Muggo
2. Mr. M. Nauman Chughtai
3. Mr. Farid Ahmad

#### **Management Sub-Committee for Resolution of Long Outstanding Audit Issues**

1. Mr. Malik Abdul Waheed - Chairman
2. Mr. Kamran Zaffar Muggo
3. Mr. Shahzad Ishaq
4. Mr. Hammad Khalid
5. Mr. Abrar Aleem
6. Mr. Zargham Khan Durrani

#### **Management Sub-Committee on AML/CFT**

1. Mr. Farid Ahmad - Chairman
2. Mr. Malik Abdul Waheed
3. Mr. Kamran Zaffar Muggo
4. Mr. Zargham Khan Durrani
5. Mr. Muhammad Nauman Chughtai
6. Mr. Shoaib Mumtaz

#### **Management Sub-Committee for Monitoring of Central Banks' Inspection Reports**

1. Mr. Malik Abdul Waheed - Chairman
2. Mr. Farid Ahmad
3. Mr. Kamran Zaffar Muggo
4. Mr. M. Nauman Chughtai
5. Mr. Abrar Aleem

### **Performance Evaluation of the Board of Directors, its Committee and Individual Directors:**

During the year, MCB Bank Limited ("MCB" or the "Bank") performed an in-house performance evaluation of the Board, the Chairman, Individual Directors including Independent Directors, the President & CEO and Board's Committees in line with the 'Guidelines on Performance Evaluation of the Board of Directors' ("SBP Guidelines") issued by the State Bank of Pakistan ("SBP") and the Listed Companies (Code of Corporate Governance) Regulations, 2019 ("CCG Regulations").

MCB Board, since 2014, has put a formal and an effective mechanism for annual performance evaluation of the

Board, its Committees and Individual Directors as per the requirements of CCG Regulations as amended and enacted from time to time. In 2016, the Bank amended its scope and methodology to align it in conformity with the SBP Guidelines and conducted the performance evaluation of overall Board, its Committees and Individual Directors for the ensuing years accordingly.

### **Performance Evaluation through External Independent Evaluator:**

SBP under BPRD Circular No. 11 of 2016 dated August 22, 2016 required that Board evaluation should be undertaken by an external independent evaluator at least once in every three years. Last year, the Bank also engaged the Pakistan Institute of Corporate Governance ("PICG") as an Independent External Evaluator, who conducted the performance evaluation of the Board, its Committees, the Chairman, the President & CEO and Individual Board Members.

#### **Criteria for Annual Performance Evaluation of the Overall Board of Directors:**

While conducting the annual performance evaluation of the Board as a whole, the Bank in line with the SBP Guidelines adopted an in-house approach. The overall rating of the Board was found highly encouraging, particularly, in respect of its composition, expertise, effective risk management, adequate system of internal controls and audit function. The Board considers the long-term policy-related matters and sets the Bank's strategic aims to put them into effect and to uphold the vision, mission and core values of the Bank. It exhibits high standards of business and professional conduct in managing and supervising affairs of the Bank and reporting to shareholders on its stewardship. The Board acts on a fully informed basis in the best interest of the Bank and its stakeholders and set 'tone at the top' in order to promote a sound corporate culture.

During the year, the overall performance evaluation of the Board was conducted by the Evaluation Committee of the Bank on basis of questionnaires broadly covered under below mentioned criteria:

- a) Is the composition of the board appropriate, having the right mix of knowledge, expertise and skills to maximize performance?
- b) How well the board exercises its role ensuring that the organization supports and upholds the vision and mission, core values etc.?
- c) Is the policy framework of bank/DFI developed appropriately?
- d) What has been the board's contribution towards developing strategies?
- e) Is the board able to make timely strategic decisions ensuring operations are in line with strategies?
- f) Is the information provided to the board appropriate, accurate, timely and unbiased?
- g) What has been the board's contribution in ensuring

- robust and effective risk management?
- h) Has the board ensured that internal control and the audit function are conducted in an effective manner?
  - i) Has the board ensured timely and accurate disclosure on all material information?
  - j) Is the board as a whole, up-to-date with latest developments in the regulatory environment?
  - k) Are the board procedures conducive to effective performance and flexible enough to deal with all eventualities?
  - l) Is the board effective in adherence to the code of conduct?

#### **Criteria for Annual Performance Evaluation of the Board Committees:**

The rationale for the formation of Board Committees is to assist it in the performance of its functions and enhance the efficiency by sharing the work load of the Board. MCB Board has formed eight (8) Committees assisting the Board in the area of audit, strategy setting, risk management, human resource management, physical planning & contingency arrangements, information technology, compliance reviews and write-offs & waivers. The size, structure and skill set of the Board Committees are in line with the applicable rules, regulations and laws as well as business needs of the Bank.

The annual performance evaluation of the Board Committees was also performed by the Evaluation Committee by using in-house-approach on the basis of specific questions/criteria mentioned in the SBP Guidelines. The consolidated final ratings of the evaluation of the Board Committees were in line with the rating given by the PICG as an independent evaluator during the year 2018. The overall results showed that the Board Committees have well-defined objectives and have been properly structured with appropriate Terms of Reference and fulfilling their respective roles effectively and efficiently.

During the year, the performance evaluation of the Board Committees was conducted by the Evaluation Committee of the Bank on basis of questionnaires broadly covered under below mentioned criteria:

- a) Are the size, structure and skill set of committees appropriate?
- b) Does each committee have adequate and appropriate written terms of reference?
- c) Are the committees effectively discharging their functions and duties as per terms of reference?
- d) Is the frequency of committee meetings adequate?
- e) Are the committee meetings organized properly with appropriate procedures?
- f) Are the committee meetings conducted in a manner that encourages open communication and meaningful participation of its members?
- g) How effectively and proactively committees have followed up with their areas of concern?
- h) Are the suggestions and recommendations of committees effective?

#### **Annual Performance Evaluation of the Chairman, Individual and Independent Directors:**

As per the requirements and criteria given by the SBP Guidelines, the performance evaluation of the Chairman of the Board was performed by the Independent Directors. Similarly, the performance evaluation of Individual Directors was conducted by the Chairman; however, Independent Directors are evaluated by all other Directors of the Bank excluding the Director being evaluated. Based on the results of the performance evaluation of the Chairman, Independent and other Non-Executive Directors, it was found that the individual Directors were making valuable contributions with proper commitment to their respective roles and responsibilities.

#### **Criteria for Annual Performance Evaluation of the President & CEO of the Bank:**

The President & Chief Executive Officer (“CEO”) of the Bank is vested with the responsibility of managing overall affairs of the Bank. He through effective leadership and team building efforts achieved the maximum possible performance of the Bank and managed the affairs of the Bank in accordance with strategic and long term objectives of the Bank. He ensured that the Bank’s resources and budgetary targets are aligned with the strategic plan of the Bank and the best industry practices. He promoted the highest standards of integrity, probity and good governance within the Bank. He showed his commitment to stakeholders of the Bank in defining strategic planning with great emphasis on service quality, investment in network infrastructure and human capital, fortifying compliance & risk standards and also remained steadfast in maintaining Bank’s fortress balance sheet. The Senior Management under his leadership devised its goals in line with the strategic direction of the Bank.

During the year, the performance evaluation of the President & CEO was conducted by all the Directors of the Bank on basis of below mentioned criteria:

- a) Were the financial/business targets set by the board achieved?
- b) Does he possess leadership qualities i.e. correct anticipation of business trends, opportunities and priorities affecting the institution’s prosperity and operations?
- c) Has he developed clear mission statement, policies, and strategic plans that harmoniously balance the needs of all the stakeholders?
- d) Does he ensure that company’s resources and budgets are aligned with the implementation of the organization’s strategic plan?
- e) Does he establish an effective organization structure to ensure management’s focus on key functions?
- f) Does he timely and effectively execute strategies set by the board?
- g) Has he served as an effective representative while communicating with all the stakeholders?



## Directors' Remuneration:

Remuneration is considered to be very important for overall success of the Bank as it helps to attract high quality professionals to the Bank. The Board has determined such level of remuneration which is appropriate and commensurate with the level of responsibility and expertise offered by the members of the Board of Directors and aimed at attracting and retaining members needed to govern the Bank successfully, and creating value addition. The Board has determined the scale of remuneration including additional remuneration to be paid to the Non-Executive Directors including Independent Directors and the Chairman for attending Board Meetings and its Committees meetings of the Bank. The scale of remuneration including additional remuneration is within the prescribed limits of the State Bank of Pakistan and it has been duly approved by the Shareholders of the Bank.

### Directors' Remuneration Policy:

The Board has framed and approved a comprehensive and transparent remuneration policy "the Policy" for the Chairman and other Directors. The Policy aims to set out the requirements and methodology for the determination of the scale of the remuneration to be paid, to the Chairman and other Directors for attending the Board and its Committees meetings during a financial year. The Policy ensures that the Board Members are fairly rewarded with regard to their respective responsibilities undertaken, and also to attract and retain high-caliber, experienced directors by offering appropriate remuneration levels commensurate with their expertise, skill and experience. It has been formulated with clear mandate and charter, keeping in view the ownership structure, governance mechanism, risk profile, scope of operations and performance of the Bank. The Policy is applicable to the Non-Executive/Independent Directors, Executive Director(s) and the Chairman of the Board of Directors. It has been prepared in accordance with the provisions of applicable laws, rules and regulations as amended from time to time.

The Bank being financial services provider always adheres to practicing good governance, enabling to enhance its efficiency and footprints in financial sector. MCB's Board is comprised of directors who have diversified experience, suitable knowledge, appropriate skill set/expertise and competencies considered relevant in the context of the Bank's operations and to make the Board an effective oversight and decision making body.

### Payment of Directors' Remuneration:

The detail of remuneration paid to the Executive Director and the Non-Executive Directors during the year 2020 has been disclosed in the Note No. 40 of the Unconsolidated Financial Statements of the Bank for the year ended December 31, 2020.

## Directors' Orientation:

Directors' orientation enables the directors to have better understanding of specific context under which directors operate and comprehend their duties and responsibilities and also to acquaint them with wider scope of the responsibilities, propagate due diligence and acting in good faith while effectively managing the interests of the Bank. It continues through the orientation stage and leads to ongoing directors' education as well as directors' and Board's assessment. An orientation program is aimed at increasing director's familiarity with the Bank, its industry as well as equipping the directors with sufficient information and resources that facilitate fully-informed decisions.

In this connection, the Board Members are regularly provided with update on new applicable laws, rules and regulations including amendments thereto to apprise them with their powers, duties and responsibilities. At the time of induction of new director(s), he/ she is given orientation about the Bank's corporate governance framework, its businesses, current issues, strategies and operations by the Management to acquaint them with the Bank's overall operations in order to enable them to effectively govern the affairs of the Bank on behalf of shareholders. The directors are also provided with the detailed written material in shape of extracts from relevant laws, rules & regulations on powers, duties & responsibilities of the Board of Directors.

### Policy of retention of fee / remuneration from Nomination on the Board of other companies:

The Directors have approved the Nomination Policy whereby Bank's Executives are nominated on the Board of other Companies on behalf of the Bank. Nominee Directors who are employees of the Bank shall, however, have to surrender compensation such as meeting attendance fee to the Bank.

### Directors' Training Program:

All the Board Members except one, either have minimum education and experience required for exemption from Directors Training Program ("DTP") or have already completed such training as narrated in the Listed Companies (Code of Corporate Governance) Regulations, 2019 (the "Regulations") and the Prudential Regulations issued by SBP.

MCB Board is fully adhered to directors training arrangements under the Regulations. Further, the Bank is also well ahead of the prescribed deadlines of DTP requirements as given by the regulator.

### Board's Function and Decision Making:

MCB Board plays an effective role and provides entrepreneurial leadership and direction for the Management of the Bank within a framework of prudent and effective controls. It promotes collective vision

of the Bank purpose, its culture, its values and also demonstrates ethical leadership. MCB Board comprises of local as well as foreign directors who have diversified experience, suitable knowledge, appropriate skills/expertise and competency considered relevant in the context of the Bank's operations and to make the Board an effective decision making body. The collective wisdom of the Board is translated into its decisions which form the basis for Management to achieve its targets.

The primary role of the Board of Directors of the Bank is to enhance shareholder value. The directions provided by the Board enable the Senior Management to deliver remarkable returns to stakeholders, sustainable performance and value added services. It also helps in building a corporate culture of equality, trust and team spirit. MCB Board is concerned with strategic matters and overseeing the business of the Bank in light of emerging risks and opportunities, on a regular basis and also involved in establishing and reviewing the strategies, yearly targets and financial objectives of the Bank.

#### **Significant Issues/Matters discussed/approved by the Board of Directors:**

During the year 2020, the Board of Directors deliberated/ approved the following Significant Issues/ Matters:

- Annual Budget for the year 2021;
- Strategic Business Plans for MCB Sri Lanka & MCB UAE – 2020-2022;
- Bank's Policies including periodic reviews and amendments thereto;
- Periodical review of Terms of Reference ("TORs") of Board's Committees;
- Financial Results of MCB Bank and consolidated Financial Results with its subsidiaries on quarterly, half-yearly and annual basis together with Directors' Report, Auditors' Report and Chairman's Review Report;
- Declaration of Interim and Final Cash Dividends;
- Related Party Transactions as recommended by Board's Audit Committee;
- Management Letter(s) issued by the External Auditors of the Bank and its compliance status;
- Update on Biometric Verification Project;
- Approval of Action Plan relating to Data Cleansing Exercise;
- Review of Institutional Risk Assessment Framework ("IRAF") Questionnaire;
- Significant activities and achievements of Board's Committees;
- Complaints Received under Whistle Blowing Program and Action taken thereon;
- Matters recommended by Board's Committees;
- Appointment/Engagement of External Auditors of the Bank as well as for Bank's Overseas Operations and also to Perform Agreed upon Procedures as recommended by the Audit Committee;

- Exception to Board's approved policies along with MIS;
- Exception from Current and Linkage Ratio Policy Framework;
- SBP Inspection Reports along with Time-Bound Action Plan thereon;
- Performance Evaluation of the Board as a whole, its Committees and Individual Directors;
- Matters pertaining to subsidiaries;
- Regulations and Standards by Central Bank of the UAE;
- Quarterly and Annual Reports on Fraud & Forgery Cases;
- Fraud Risk Assessment;
- Consumer Lending Business and Wealth Management Business;
- Write-offs/Waivers approved at Different Authority Levels and recoveries thereto;
- Status and implications of all material law suits filed by and against the Bank;
- Disposal of MCB Financial Services Limited, a wholly owned subsidiary of the Bank;
- Donations for Charitable Institutions under CSR activities of the Bank;
- Nominations of Members of the Board and Management on the Board of subsidiaries and other companies;
- Shares transferred of the Bank during the year 2020;
- Annual Branch Expansion Plan of the Bank; and
- Update on Laws, Rules and Regulations.

#### **Matters Delegated to the Management:**

The Board sets the strategic objectives and takes the overall responsibility of overseeing its implementation. The Board performs its duties by giving guidelines to the Management, setting performance targets and monitoring their achievements. The Management is primarily responsible for implementing the strategies as approved by the Board of Directors in conducting the operations of the Bank effectively. Tactical and operational matters are delegated to the Management. Further, under the direction and oversight of the President & CEO of the Bank, the Senior Management carries out and manages the Bank's activities in a manner consistent with the strategies, business goals, risk appetite, incentive compensation and other policies approved by the Board of Directors.

#### **Governance Practices Exceeding Legal Requirements:**

MCB Board as a whole respects the country laws and ensures meticulous compliance of applicable laws, rules & regulations and being a leading Bank always adheres to provide information and disclosures above the minimum regulatory requirements. The Board never gives the room for any sort of non-compliance and takes it as reputational risk for the Bank. The Management also regularly updates the Board with the latest development in the regulatory

environment and maintains stringent control over regulatory compliance through designated resources. Following are some of the practices of the Bank which exceed the minimum legal requirements:

- The Board has formed its eight sub-Committees as against legal requirement of four.
- The Bank has only one Executive Director (President & CEO) though permitted two executive directors by SBP and four (one third of the Board as executive directors) under the Listed Companies (Code of Corporate Governance) Regulations, 2019.
- Voluntary adoption of best reporting practices as prescribed by ICAP/ICMAP/SAFA with a view to making the Bank's financials more transparent.
- The Bank reports additional information in the Annual Report for stakeholders which is not required by any laws.

#### **Roles and Responsibilities of the Chairman and the President & CEO of the Bank:**

The Roles and Responsibilities of the Chairman and the President & CEO of the Bank are described below:

##### **Roles and Responsibilities of the Chairman:**

The Chairman of the Board of Directors ("the Board") shall be elected from amongst the non-executive directors of the Bank and shall not hold the office of Chief Executive Officer ("CEO"). He shall be responsible for leadership of the Board and shall ensure that the Board plays an effective role in fulfilling its responsibilities. The Chairman has responsibilities and powers as vested in him/her by law, Articles of Association of the Bank and/or assigned, from time to time, by the Board. In particular, the Chairman will coordinate the affairs of the Board and chair the meetings of the Bank; however, he shall not participate in day-to-day management affairs of the Bank.

##### **The Chairman shall ensure that:**

- The composition of the Board is in accordance with legal and regulatory requirements;
- The Board as a whole is functioning effectively in accordance with applicable laws, regulations and rules to inculcate sound business principles and prudent commercial practices;
- The Board receives appropriate, accurate, timely and unbiased information, in particular, about the Bank's affairs and performance to enable the Board to take sound and effective decisions;
- The meetings of the Board and the Shareholders of the Bank are convened in compliance with legal and regulatory requirements; and proceedings of such meetings are accurately and fairly recorded. The agenda of the meetings take full account of applicable laws & regulations and the requirements of Bank's business;
- All Board Members are encouraged to participate and raise issues and concerns in the Board discussions,

whilst promoting highest standards of Corporate Governance;

- The Board is concentrating on relevant issues and conflicts (if any) are effectively resolved;
- The Board sets the tone and values of the Bank; promotes a culture of openness and constructive debate and effective decision making;
- The Board is periodically updated on its statutory and fiduciary duties, as required in relevant laws, regulations and rules, enabling the Directors to perform their roles & responsibilities properly and prudently in the best interest of the Bank;
- Good relationship is maintained with Board Members, the Management and the Shareholders; so that obligations to the Shareholders and other stakeholders are understood and met; and
- Shareholders' and other stakeholders' interest is promoted in the decisions taken by the Board.

The Chairman and the Vice-Chairman are elected by the Board in accordance with the provisions of the Articles of Association of the Bank and hold the office for a period of three years. In the absence of the Chairman, the above mentioned roles and responsibilities of the Chairman are performed by the Vice-Chairman of the Bank.

##### **Roles and Responsibilities of the President & CEO:**

The President & CEO of the Bank, subject to the control and directions of Board, are entrusted with the whole, or substantially the whole, of the power of the Management to direct, manage, administer and control the affairs of the Bank. He shall be responsible to the Board for the implementation of its strategies, policies and decisions. The terms and conditions of appointment of the President & CEO are determined by the Board of Directors. The President is to be deemed a director and also entitled to all the rights and privileges and be subject to all the liabilities of that office. He/she possess leadership qualities i.e. correct anticipation of business trends, opportunities and priorities affecting the institution's prosperity and operations.

##### **The President & CEO of the Bank shall:**

- Set the appropriate performance standards to achieve financial/business targets set by the Board;
- Ensure that Bank's resources and budgets are aligned with the implementation of its strategic plan;
- Ensure assessment, monitoring and effective management of the significant risks to the Bank;
- Ensure that Bank maintains high standards of corporate citizenship and social responsibility wherever it operates;
- Establish an effective organizational structure having appropriate resources/systems within the Bank, to ensure Management's focus on key functions;
- Timely and effectively execute strategies set by the Board;

- Manage the affairs of the Bank in accordance with strategies and long term objectives approved by the Board;
- Ensure effective communication with the Board, Shareholders, Employees, regulatory authorities and other stakeholders and serve as an effective representative of the Bank while communicating with all the stakeholders;
- Ensure through effective leadership, team building and motivation that the maximum possible performance is achieved by the Bank and ensure that the affairs of the Bank are being managed in accordance with highest ethical standards, sound business principles and prudent commercial practices;
- Exercise the overall control, discretion, administration and supervision for the sound and efficient management and conduct of the business of the Bank;
- Monitor short term goals and ensure that the operating groups/divisions develop their own plans for the future, which need to be quantified as far as possible with benchmarks established;
- Conduct a periodic performance review of the Senior Management team so that major initiatives such as expansion strategies, acquisitions and capital investments should be finalized and adopted through major marketing and development exercises;
- Provide the Board with the relevant information it needs to carry out its fiduciary responsibilities and to supervise the Senior Management;
- Liaise between the Board and the staff, and communicate on a regular basis with both to promote understanding, cohesiveness and coordination for development of policies and their implementation;
- Ensure the compliance of applicable laws, rules and regulations;
- Ensure establishment of an effective information mechanism whereby internal and/or external significant/material items affecting Bank's affairs are identified and shared with relevant stakeholders on timely basis; and
- Maintain follow up on regulators' observations and other lawful instructions and issues raised by external and/or internal auditors and to ensure their strict adherence/compliance in Bank's operations.

### Code of Conduct & Ethical Standards for Directors:

The Bank has also developed "Code of Conduct & Ethical Standards for Directors" as per the requirements of Code of Corporate Governance which is signed annually by every Director of the Bank.

### Directors' Profile:

Directors' profile has been incorporated in the "Board of Directors" section.

### Accessibility of Annual Report-2020:

Annual Report-2020 and other information of the Bank are accessible on Bank's Website: [www.mcb.com.pk](http://www.mcb.com.pk)

### Security Clearance of Foreign Directors:

Foreign Directors elected on the Board of Bank requires security clearance from Ministry of Interior through SECP. All legal formalities and requirements have been met and fulfilled in this regard.

### Board's Policy on Diversity:

The Board of Directors firmly believes that the diverse mix of gender, knowledge, expertise and skill sets of the members / employees enhances the effectiveness of the Bank.

MCB is committed in fostering, cultivating and preserving a culture of diversity and inclusion. Human capital is the most valuable asset the Bank has. The collective sum of the individual's life experiences, knowledge, inventiveness, innovation, self-expression, unique capabilities and talent that employees invest in their work, represents a significant part of Bank's culture, as well as reputation and achievement.

The Bank embraces and encourages employees' with a mix of age, physical disability, family ethnicity, language, political affiliation, religion, sexual orientation, socioeconomic status and other characteristics that make its employees unique.

### Related Parties and approved Policy for Related Party Transactions

The Board of Directors has approved a Policy for Related Party Transactions. The Bank's policy is to conduct all the related party transactions on an arm's length basis in the in the normal course of business. If a transaction is not conducted on arm's length basis then specific approvals or ratifications is required by the Board on recommendation of the Audit Committee of the Bank in order to avoid any potential conflict of interest.

The policy specifies that all transactions entered into with related parties shall require Board's approval on the recommendation of the Board Audit Committee of the Bank, which is chaired by an independent director of the Bank.

Every director (including spouse, children, step children and parents) of the Bank who is in any way, whether directly or indirectly, concerned or interested in any contract or arrangement entered into, or to be entered into, by or on behalf of the Bank shall disclose the nature of his concern or interest at a meeting of the board. No director of the Bank shall, as a director, take any part in the discussion of, or vote on, any contract or arrangement entered into, or to be entered into, by or on behalf of the Bank, if he/she is in any way, whether directly or indirectly, concerned or interested in the contract or arrangement, nor shall his/

her presence count for the purpose of forming a quorum at the time of any such discussion or vote.

During the year, the Bank has entered into transactions and contracts with the related parties i.e. subsidiary and associate companies, post-employment benefit plans for the Bank's employees, Key Management Personnel (KMPs), Close Family Members (CFMs) of KMPs and other related entities. Those transactions include lending activities, acceptance and placements, off balance sheet transactions and provision of other banking and financial services that are carried out in the ordinary course of business on an arm's length basis at commercial rates, except for the transactions that KMPs have availed under HR policy of the Bank. Contributions to and accruals in respect of staff retirement benefits and other benefit plans are made in accordance with the actuarial valuations / terms of the contribution plan. Remuneration to the executives / officers is determined in accordance with the terms of their appointment.

The Bank has made detailed disclosures about related party transactions in its financial statements annexed with this annual report.

During the year, no contract or arrangement entered with related parties other than in the ordinary course of business on an arm's length basis.

## Managing Conflict of Interest:

### Overview:

A conflict of interest arises when a director, directly or indirectly, has an interest, pecuniary or otherwise, in performing his functions or duties and such interest could lead to impair his ability to consider and decide any matter impartially, without creating biasness in his or her own decision.

The Board Members owe certain fiduciary duties, including the duties of loyalty, due diligence, and confidentiality to the Bank which require that a director must act in good faith in order to promote the objectives of the Bank in the best interests of the Bank itself and its shareholders, employees and community as a whole. In this regard, the Bank had developed "Code of Conduct & Ethical Standards for Directors" as per requirements of Code of Corporate Governance which required that every director of the Bank has to disclose potential or actual conflicts of interest with respect to his/her duties as soon as they arise or he/she becomes aware of them. All the Board Members took reasonable steps to avoid being in an actual, apparent or potential conflict of interest. The Board recognizes the responsibility to adhere to the defined policies of the Bank and avoid perceived conflicts of interest that may arise during the course of business.

### Disclosure of Interest by Director:

Every director (including spouse, children, step children and parents) of the Bank who is in any way, whether directly or indirectly, concerned or interested in any contract or

arrangement entered into, or to be entered into, by or on behalf of the Bank shall disclose the nature of his concern or interest at a meeting of the board. No director of the Bank shall, as a director, take any part in the discussion of, or vote on, any contract or arrangement entered into, or to be entered into, by or on behalf of the Bank, if he/she is in any way, whether directly or indirectly, concerned or interested in the contract or arrangement, nor shall his/her presence count for the purpose of forming a quorum at the time of any such discussion or vote. As per the Code of Corporate Governance, the Bank has developed the mechanism to place the matter before the general meeting for its approval where majority of the directors are interested in any transaction or event.

### Disclosure of Interest by Officers:

No other Officer of the Bank who is in any way, directly or indirectly, concerned or interested in any proposed contract or arrangement with the Bank shall, unless he discloses the nature and extent of his/her interest in the transaction and obtains the prior approval of the Board of Directors, enter into any such contract or arrangement.

### Exposure in Companies where Directors are Interested:

The Bank may take exposure in the companies in which directors (including their spouses, parents, and children) hold key management positions, or are interested as partner, director or guarantor, or shareholders holding 5% or more of the share capital of that concern, with the approval of the majority of the directors excluding the director concerned. The financing facilities shall be extended at market terms and conditions and be dealt with on arm's length basis.

The Bank shall not enter into leasing, renting and sale/purchase of any kind with their directors, officers, employees or such persons who either individually or in concert with family members beneficially own 5% or more of the equity of the Bank.

The Bank shall not take unsecured exposure on, or take exposure against the guarantee of any of its directors, any of the family members of any of directors and any firm or private company in which our directors are interested as director, proprietor and partner or public company in which such persons are substantially interested.

### Conflicts of Interest Register:

The Bank maintains a register of all contracts, arrangements or appointments in which directors are interested.

### Insider Trading:

Directors being the insiders are prohibited by the law to indulge in insider trading. They shall not deal directly or indirectly in the securities of the Bank whether on their own account or their relative's account, if they are in possession of any unpublished price sensitive/inside

information, which if published or known, is likely to materially affect the price of Bank's securities. Directors are usually considered to have such information, shall not communicate directly or indirectly the said information to others who might exploit such information while trading in the securities of the Bank.

As per the regulatory requirements relating to Insiders' trading, the Bank is maintaining the register of Insiders who have access to unpublished price sensitive/inside information and the said Register regularly updated by the authorized personnel of the Senior Management of the Bank.

Whenever, the Bank or a person acting on its behalf, discloses any inside information to any third party in the normal exercise of employment, profession or duty; a complete and effective public disclosure of that information is made simultaneously unless such person owes a duty of confidentiality. Further, Bank has approved policy on Prohibition of Insider Trading which is effectively implemented throughout the Bank.

## Investor Grievances

MCB Bank ensures safeguarding the interests of its stakeholders by effective communication at regular intervals through multiple mediums. However, the Bank acknowledges that there may be instances where the stakeholders may have unaddressed concerns which if unresolved may become a grievance. To timely address any untoward incident, the Bank has a well-functioning grievance resolution mechanism that provides a transparent and credible process resulting in outcomes that are seen as impartial, effective, and durable. Through this initiative the Bank is able to reduce investment risks, provide an effective avenue to express and resolve concerns, thereby substantiating positive relationship. The Bank ensures quality services with uncompromising focus on investors' concerns and transparency in execution thereby extending respect to the trust placed.

The Bank is rigorously following the complaints of investors received from any regulatory forum and designate exclusive resources to resolve the matter both effectively and efficiently. Further, a centralized function namely the Shares department in the Corporate Affairs Division striving hard to manage any such investor grievances in consultation with the share registrar. Investors can lodge complaints by contacting the shares registrar, or write a letter or send an email to the share department of the Bank. A designated e-mail address, (investor.relations@mcb.com.pk) has been created to timely address the same and is readily available through our website and annual reports. The Bank ensures resolution of any grievances within statutory timelines.

## Human resource management policies and succession planning

Human Resource Policies" have been approved by the Board of Directors of the Bank on the recommendation

of Human Resource and Remuneration Committee of Board in order to provide clear and definitive directions on human resource (HR) related matters.

MCB being an equal opportunity employer is committed to create a congenial and efficient work environment in which the employees are assured a non-discriminatory, transparent, harassment free and respectful atmosphere regardless of their cast, creed, religion and gender. The Bank talent-acquisition policies provide unbiased criteria for hiring people through lateral and batch hiring, from any background as long as they qualify for the professional criteria required by the Bank. The culture at MCB Bank also depicts a healthy, team based and cooperative environment. We value the unique talents and perspectives of our employees and strive to create a respectful workplace.

The Bank is committed towards employee development practices which enable all its employees to reach their optimum potential, thereby creating a high performance organization. This belief is supported by the Bank's comprehensive approach towards performance management, career development and management training. The Bank affirms its belief in motivating its work force through positive reinforcement and opportunities in each of these key areas regarding employee development. The Bank has a transparent KPI based performance assessment and reward mechanism that allows front office employees to track their performance with their goal achievement throughout the year.

## Salient feature of Staff Compensation/Remuneration Policy

The Remuneration Policy of Bank is designed to promote a culture of sound compensation aligned with risk and responsibilities in a transparent manner for acquisition of talent, retention of employees and achievement of stakeholders expectations. MCB's remuneration policy applies to all staff. The policy covers identification of Material Risk Taker (MRT) and Material Risk Controllers (MRC), performance assessment through balanced scorecards, compensation structure and deferral mechanism.

The responsibility for approving the remuneration policy rests with the Board of Directors. The Board has constituted Human Resource & Remuneration Committee (HR&RC) for recommending to the Board, the structure of the remuneration policy, including the remuneration setting mechanisms, structures, composition of remuneration, and other related matters. HR & RC may take the support of Bank's functions (e.g. Finance, Risk, Audit, Compliance, and HR). At management level, HRMG leads the overall remuneration policy of MCB.

All compensation provided to MCB staff can be divided into fixed or variable remuneration. Fixed remuneration is that part of the compensation which remains unaffected by the performance of the Bank or individual employee. Fixed component of remuneration consists of basic salary

and allowances that are part of the total compensation package of the employee. Variable remuneration is the part of total compensation package of an employee which is linked with some predetermined measures of performance. Variable compensation is linked with the individual's performance and comprises of performance bonus, commissions, incentives and allowances.

The Bank has identified functions and designations as MRTs/MRCs. These include, President/CEO, direct reportee to the President/CEO (members of management committee), Country heads of overseas branches, direct reportee to the members of senior management managing critical functions as determined by HR&RC and all other material Business units.

Balanced scorecards are defined for all MRTs & MRCs for carrying out an objective and transparent performance assessment. The variable compensation for the MRTs and MRCs is linked to the performance result derived from the scorecard. The performance assessment for MRTs and MRCs is performed via the structured balanced scorecard mechanism that is in place to ensure that objective risk and return measures are duly taken into account for determining the bonuses and awards for MRTs and MRCs. The bonuses and awards for MRTs are determined based on the performance of the individual, their respective department and the overall Bank.

MRCs in the Bank have suitable autonomy and authority to perform their tasks independently, without influence from the functions they are assigned to oversee and review. KPIs in the scorecards of MRCs are independent of the KPIs of the business functions that they oversee. This ensures that achievement of financial targets of the business functions are not considered for the performance assessment of the MRCs.

For MCB employees classified as MRTs and MRCs, at least 25% of their variable remuneration shall be deferred. Minimum deferral period is three years with no vesting prior to year 1. Deferred variable remuneration shall be paid.

### Policy for Sustainability and Corporate Social Responsibility (CSR)

Policy Sustainability and Corporate Social Responsibility (CSR) is detailed in Sustainability and Corporate Social Responsibility Section of this report.

### Responsibilities of Management and the Board of Directors toward the preparation and presentation of the financial statements

The Management is aware of its responsibility for the preparation and fair presentation of the financial statements in accordance with accounting and reporting standards as applicable in Pakistan, the requirements of Banking Companies Ordinance, 1962 and the Companies Act, 2017 (XIX of 2017) and for such internal control

as management determines is necessary to enable the preparation of financial statements that are free from material misstatement, whether due to fraud or error.

The Board of directors is responsible for overseeing the Bank's financial reporting process.

### Policy for Safety of Records of the Bank:

Record management is a methodological approach to control the maintenance and disposition of organization's record. Record management ensures that valuable record evidencing an organization's activities that have legal, financial, administrative or historical value are protected and accessible while expired record is systematically destroyed. Thus MCB Bank has put in place comprehensive processes, controls and guidelines on handling, protection, retention, retrieval, and disposition of recorded business information generated daily which are of ongoing importance to MCB's overall service capability and regulatory compliance. In its endeavor to comply these guidelines / processes, bank has already achieved major milestones.

### Social and Environmental Responsibility

MCB Bank Limited undertakes its responsibility to be recognized as an organization that is aware of both its social and environmental obligation. The Bank continuously strives to inculcate the same by creating awareness amongst stakeholders, streamlining its operational processes and reinforcing the same through various policies. The key areas that the Bank focuses upon are to provide a safe and healthy workplace, protect the environment and conserve energy through use of appropriate technology and management practices.

Some of the salient features of the Bank policy are as follows:

- Compliance with local, national and international laws and regulations as well as the spirit thereof and conduct of business operations with honesty and integrity
- Promote and engage in social welfare activities that help strengthen communities and contribute to the enrichment of society
- Provide innovative, safe and outstanding high quality banking products and services exceeding the expectations of customers
- Significant investment to develop technological based 'Alternative Delivery Channels' for maximum 'Financial inclusion'
- Sustainable development through building and maintaining sound relationships with our stakeholders through open and fair communication
- Communication and dialogue with employees, to build and share the value of "Mutual Trust and Mutual Responsibility" and work together for the success of our all stakeholders
- Respect for people by honoring the culture, customs,

history and laws of Pakistan. Constantly search for safer, cleaner and superior practices that satisfy the evolving needs of the society

- Minimize the environmental impact of business operations, by working to reduce the wastage of all resources
- Develop, establish and promote practices enabling the environment and economy to coexist harmoniously and build close and cooperative relationships with individuals and organizations involved in environmental preservation

## Review by the Board of the Bank's Business Continuity Plan

Business Continuity Management (BCM) is a process that identifies and recognizes risks, threats and vulnerabilities that could impact Bank's operations internally or externally. BCM provides framework and creates ability for an organization to mitigate risk, withstand changes in the environment and still perform its critical processes and functions.

A robust Business Continuity Plan (BCP) outlines a range of disaster scenarios and the steps to be taken in order to minimize the potential harm to business during adverse situations. BCP's/system recovery procedures are written ahead of time therefore Bank endeavors to have sustainable, effective enterprise wide BCM program to provide seamless services and product reach to its customers/ stakeholders.

The Board of Directors periodically reviews and gauges Banks preparedness to deal with any untoward situation. Furthermore the senior management of the Bank ensures to maintain an effective Business Continuity Policy & Framework to ascertain that clear and concise plans are maintained for all critical areas which encompasses strong remedial actions to reduce the risk of downtime in any contingency scenario. In these difficult times when the world was taken aback by COVID-19 and every segment of life got affected the Bank adopted a proactive approach and immediately arranged for the Personal Protective Equipment's (PPEs) comprising of face masks, hand gloves, face shields, hand sanitizers etc. for its staff and visiting customers. Furthermore special screening arrangement, maintaining social distance, minimizing staff strength, periodic disinfection in branches and offices were the initiatives taken to ensure continuity of business and services, thus complying with Government and WHO precautionary instructions.

Further to nurture and enhance the confidence on Bank's system and processes; Business Continuity Plans are tested and updated on regular intervals. Since BCM is well knitted into the Banks structure and branch network, thus it gives confidence to its millions of customers, stakeholders and regulator that the Bank can live up-to the commitment and expectations by ensuring continued functionality of its critical businesses and functions in any circumstances.

## Stakeholders' engagement

Stakeholders' engagement and the steps taken to solicit and understand the views of the shareholders is detailed in stakeholders' engagement section of this report.

## Whistle Blowing Program

### Overview

MCB Bank is committed to continually operate at the highest standards of conduct in our business. We are the trustees of public funds and it is our core value to serve our community with integrity. We endeavor to earn and uphold the trust of all our customers and stakeholders by serving and dealing with them lawfully, ethically and professionally.

### Purpose

This program provides a channel to Bank's staff and outside parties such as shareholders, vendors, customers etc. for raising concerns/complaints about irregularities, impropriety, financial malpractices, frauds & forgeries, personnel harassment and improper conduct or wrongdoing without any fear of reprisal or adverse consequences. The objective of the program is to address/resolve these concerns/complaints to prevent and/or detect improper activities for safeguarding the interest and reputation of the Bank and its stakeholders.

### Scope

The program covers deliberate, voluntary disclosure of individual or organizational impropriety by a person who has or had privileged access to data, information or event about an actual, suspected or anticipated wrongdoing within or by an organization that is within its ability to control.

### Protection of Whistle Blowers

MCB Bank is committed to the protection of genuine complainants against action(s) taken in reprisal for the making of protected disclosures. Confidentiality of the complainant's identity, the nature of the report and the identity of the suspected person is strictly maintained.

The Bank does not tolerate harassment or victimization and takes action, which could involve disciplinary proceedings, to protect complainants when they raise a concern in good faith.

### Incentives for Whistle Blowing

Complainant may be awarded monetary benefit/career advancement depending upon the nature and gravity of the concerns/complaints.



### Whistle Blowing Mechanism

Employees or outside parties with concerns or complaints may report such concerns or complaints to Whistle Blowing Unit through any of the following means:

- Landline
- E-mail
- Fax
- Website
- Regular Mail

Concerns and complaints are investigated and findings are shared with the senior management for their necessary action. Information related to investigations is also shared with the Audit Committee and Board of Directors.

### Number of instances reported to Audit Committee

Number of whistle blowing incidents (wrongdoings) along with update on investigations/resolution reported to the Audit Committee and Board of Directors during the year 2020 was 13.

### Significant changes from prior years

- During the year three group heads (Key Management Personnel) retired/resigned from their positions and board approved their replacements accordingly.
- During the year, the Bank, in line with the shareholder approval, disposed of its ownership stake in the wholly owned subsidiary namely MCB Financial Services Limited.

### Shares held by Directors, Chief Executive Officer, their Spouses and Minor Children

Shares held by Directors, Chief Executive Officer, their Spouses and Minor Children have been disclosed in "Categories of Shareholders" section of the Annual Report.

### Presence of Chairman of Audit Committee at the AGM

The Chairman of the Board Audit Committee was present at the AGM to answer questions on the Audit Committee's activities and matters within the scope of the Audit Committee's responsibilities.

### Chairman's significant commitments

Mian Mohammad Mansha has served as Chairman of MCB Bank, after its privatization, from 1991 to mid-1995 and then from 1997 till date. Presently, he is also a member of the Board's Human Resource & Remuneration Committee, Committee on Physical Planning & Contingency Arrangements and Business Strategy & Development Committee at MCB Bank Limited. He does not have any significant commitment other than the one mentioned in his profile under "Directors Profile" section of the Annual Report.

# Pandemic Recovery Plan by the Management and Policy Statement

The emergence of COVID - 19 pandemic during the year inflicted an unprecedented global crisis; taking a large toll on human lives, inducing a synchronized economic downturn and exerting long term socio-economic repercussions. The emanating uncertainty garnered emergency response from Governments' across the globe in the form of multiple policy measures implemented on the economic, fiscal and monetary fronts. The unprecedented COVID-19 crisis has brought about many challenges for the financial sector and regulator.

Responding to the challenge, MCB leveraged its robust "BCM Policy and Framework" to implement a comprehensive pandemic recovery plan encompassing guidelines by International and National authorities and a risk based focus to protect the staff from impact of pandemic illness and ensure information system uptime, data integrity, service availability and overall business resilience.

Pandemic impacted several aspects of the bank's operations such as shortage of staff, increase in use of ATMs, increase in volume of digital and call center services, delay in payments and increase in delinquencies etc.

During pandemic, the Bank ensured that strategies and processes are in place to enable business continuity to provide critical services while ensuring the health and safety of employees, customers, and vendors. Technology played a major role in business continuity.

## 1. Ensured the health and safety of employees, customers and vendors

During pandemic, the Bank implemented below measures to allow the continuity of operations with minimal contact between staff, customers, or suppliers for prolonged periods of time.

1. Redirected customers from branch/office visits to online banking services. Encouraged customers to use bank's digital tools and other resources for self- service banking and 24/7 account access.
2. Reduce hours of operation and enabled employees to work from home or from alternative sites.
3. Used teleconference/videoconference for meetings (even for people in the same building).
4. Implemented restrictions on visitor access to the bank facilities and enforced quarantine for sick staff.
5. Installed sanitizing gel dispensers throughout all areas used by clients inside the branch and in internal areas for employees.
6. Rearranged furniture in order to allow more space between employees and between employees and clients or vendors.
7. Ensured the regular disinfection of sensitive areas and defined office hygiene procedures.
8. Regular temperature check was ensured at entry points of all locations and face masks made mandatory.
9. Strict protocols on social distancing were put in place.

## 2. Ensured continuity of the Bank's operations

With shortage of staff, decline in branch activities, and the reduction in human interaction in general, the use of technology played an extremely important role.

1. Identified which jobs and tasks can and cannot be done, even partially, without being physically present in the office.
2. Ensured employees know how to use the various hardware and software dedicated for remote working.
3. Ensured preparedness for a high absentee rate and make back-up arrangements for key staff and functions.
4. Cross-train employees and ensure that succession/replacement plans are in place.
5. Established procedures for safeguarding data, including backups.
6. Audited the technology used for remote access and check for the need of increasing capacity, bandwidth and authentication mechanisms.
7. Checked the capacity of networks to handle increase in traffic.
8. Ensured telecommunication structure can handle increase in call volume.

## IT Governance

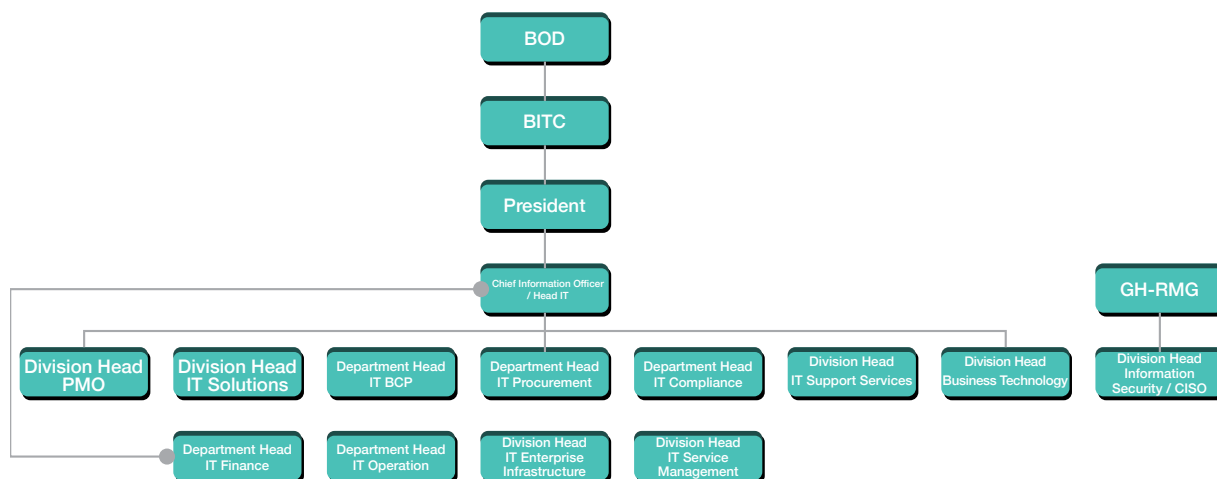

IT Governance is an integral part of Enterprise Governance and consists of the leadership and organizational structures and processes that ensure that the Bank's IT sustains and extends the Bank's strategies and objectives. IT Governance systematically engages the Board members, executive management and underlying staff. It establishes a discipline used by the organization to measure transparent accountability of decisions, and ensures the traceability of decisions to assigned responsibilities. Well-structured IT Governance would assist in creating efficiencies, enhance conformity to internationally accepted best practices, improve overall IT performance and also enable better control and security.

Information Technology Group is headed by CIO who in turn reports functionally and administratively to the President/CEO. The Office of the CIO provides the leadership for the development and delivery of world-class technology services.

The position is directly responsible for;

- Managing the operations of Information and Technology Services for efficient and smooth delivery;
- Recommending IT Strategy that is aligned with Bank's overall Strategy;
- Encouraging technical innovation and the development of a robust and dependable technology infrastructure;
- Strengthening the IT Governance;
- Providing guidance, oversight, and strategic thinking on information technology;
- Setting the overall direction for IT Group to introduce and implement innovative technology solutions;
- Ensuring the availability of Bank's services as up & running and active DR invocation mechanism at the time of disaster.

Information Technology Group (ITG) has been taken care by teams of committed professionals, providing innovative and efficient solutions to achieve and nurture strategic objectives and goals of Business as well as other support

groups under the guidance of Board IT Committee (BITC) and management IT Steering Committee (ITSC).

Group is further be strengthened by following functions:

- IT Enterprise Infrastructure
- IT Operations
- IT Software Solutions
- IT Service Management
- IT Support Services
- IT Business Technology
- IT Project Management
- IT Financial Services
- IT Procurement
- IT Compliances & Internal Control
- IT Business Continuity

### INTERNAL GOVERNANCE

The Bank's Management IT Steering Committee (ITSC) & Board IT Committee (BITC) are the governing bodies that review, monitor, prioritize and approve major IT projects. Key Objectives of these committees are:

- To provide a forum for discussions, review and advice on Technology needs, Investments, Issues & Progress;
- Prioritize, approve and monitor investments (projects & resource allocation), financial objectives and performance in order to review whether IT and Business strategies aligned with each other;
- Assessment of IT capability and adequacy of the IT infrastructure & Guidance on strategic goals and direction to see if enterprise achieving the optimum use of the IT resources;
- To review adoption of best practices, standardization and interoperability internally and externally;
- To provide resolution of cross-function or intercompany critical issues;
- Consideration of risk exposures and monitoring of risk management;
- To review the communication path between the board/executive and middle management.

## Adoption and Statement of Adherence with the International Integrated Reporting Framework

In the course of its operations a commercial organization receives various inputs and converts them into value for itself and its stakeholders. This value creation can be over different time frames; short, medium and long. An integrated report describes this value creation process concisely including the business model, strategies, governance, processes, risks and opportunities.

Since MCB is one of the largest Commercial Bank and plays a vital role in the economy of the country. It also makes its presence felt at the grassroots level with its sprawling network of branches and its wide customer base. Therefore, it has an impact far beyond the bottom line. Being the Bank with one of the largest customer base it is imperative; therefore, that the Bank reassures its stakeholders that it is safeguarding the public interest.

Adoption of International Integrated Reporting Framework depends on the individual circumstances of an entity. The Bank has adopted the Integrated Reporting Framework to give an overview of Bank's philosophy to explain connection between its financial and non-financial information, which would enhance the user's understanding as to how the Bank is working to improve its performance keeping in view the stakeholder's interests. The business strategy information is linked directly to business activities and non-financial information, and provides explanations accordingly. Integrated framework is still considered to be a practice in its early stages. We will continue to improve the information produced to make it even easier to understand, while taking into account the opinion of stakeholders reading this report.

The Bank has included following content elements for the users of this report:

- Organizational overview and external environment
- Strategy and resource allocation
- Risks and opportunities
- Governance
- Performance and position
- Outlook
- Stakeholder's relationship and engagement
- Sustainability and corporate social responsibility
- Business Model
- Excellence in corporate reporting

The Bank's Annual Report 2020 covers the 12-month period from January 01, 2020 to December 31, 2020 and is consistent with our usual annual reporting cycle for financial and integrated reporting. The most recent previous report was dated December 31, 2019.

## Profile of Shari'ah Advisor Board

Profile – MIB Shari'ah Board Members

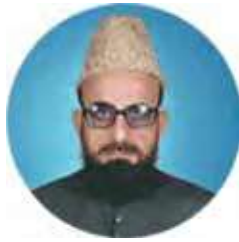

**Prof. Mufti Munib-Ur-Rehman**  
Chairman Shari'ah Board

Prof. Mufti Munib-ur-Rehman, working with MCB Islamic Bank since September 2015, is a renowned Shari'ah scholar with a vast 48 years' teaching and 33 years' Fatawas issuance experience. He remained the member of Shari'ah Advisory Board of Securities and Exchange Commission of Pakistan (SECP) for three terms and the member of the Council of Islamic Ideology Pakistan (CIIP), he rendered voluntary services for the country since 2001 to 2020 as Chairman Central Moon Sighting Committee Pakistan. He served as Director of Islamic Studies, Hong Kong in 1985. He is the president of Tanzeem-ul-Madaris Ahle Sunnat Pakistan & Secretary General of Ittihad-e-Tanzeemat-e-Madaris Pakistan. He participated in international seminars in Saudi Arabia, UK, Norway, USA, Canada, Kazakhstan, Turkey and other Countries.

He remained member of the Board of Studies of University of Karachi, Federal Urdu University & Board of Intermediate Karachi. He remained member of the syndicate of University of Karachi & PMAS Arid University, Rawalpindi. He is the member of National Curriculum Pakistan & National Education Task Force. He was Shari'ah Adviser of Federal Shariat Court Pakistan. The 11 Volumes of his Fatwas has already published and has vast acceptability amongst Ulama. He is the Principle & Managing Trustee of Jamia Naeemia Karachi. He is Chairman Shari'ah Advisory Committee of Dawood Family Takaful Ltd and remained Chairman Shari'ah Board of Burj Bank Ltd for more than a decade.

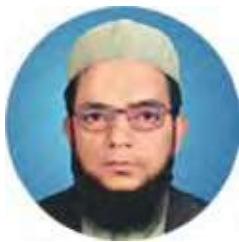

**Mufti Syed Sabir Hussain**  
Resident Shari'ah Board Member/ Head-Shari'ah Compliance Department

Mufti Syed Sabir Hussain, working with MCB Islamic Bank Ltd. since September 2015, is a prominent Shari'ah Scholar and experienced Islamic Banker with 21 years of teaching, 14 years of Fatawa and Islamic banking experience. He holds Shahadat-Al-Alimiyah & Takhassus-Fil-Fiqh, M.A Islamic Studies, M.Phil in Islamic Banking & Finance and M.S (I.T) degrees. He is enrolled in Phd. on Islamic Banking and Finance from International Islamic University, Islamabad (IIU).

He is ex-member of Shari'ah Advisory Board of SECP, Member of the Committee on Accounting and Auditing Standards of ICAP and invitee participant of Shari'ah Advisory Committee of State Bank of Pakistan and Member of several committees constituted by SBP on AAOIFI Shari'ah standards. Further, he was member of review committee for Urdu translation of AAOIFI Shari'ah standards. He is author of 27 books on Islamic economics & banking and other social issues; He is also delivering lectures in different Dar-ul-Ulooms and Universities.

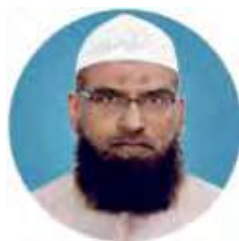

**Mufti Nadeem Iqbal**  
Shari'ah Board Member

Mufti Nadeem Iqbal is the Shari'ah Board Member. He is senior teacher and Mufti at Dar-ul-Uloom Amjadia, Karachi and currently heading Dar-ul-Ifta. He has 29 years' experience of teaching Islamic Jurisprudence and 17 years' experience of issuing Fatawa (Shari'ah Opinions). He has 15 years' experience in Islamic Banking. He holds Master's Degree in Islamic Studies from University of Karachi, Takhusus-Fil-Fiqh from Dar-ul-Uloom Amjadia, Karachi, Fazil Dars-e-Nizami, and Fazil Shahada-tul-Almia. He gave his services as Resident Shari'ah Board Member/ Shari'ah Advisor at Soneri Bank's Islamic Banking Division for thirteen years. He is visiting faculty member at Sheikh Zayed Islamic Centre, University of Karachi and Hamdard University, Karachi. He is writer of several books including Islamic Jurisprudence.

## Role of Shari'ah Board

- i. The Shari'ah Board (SB) shall advise the BOD and the executive management of the MCB Islamic Bank Ltd. (MIB) on all Shari'ah related matters. All the SB's Decisions/Rulings/Fatawas shall be binding on the MIB whereas the Shari'ah Board shall be responsible and accountable for all its Shari'ah decisions.
- ii. The SB shall cause to develop a comprehensive Shari'ah compliance framework for all areas of operations of the MIB and shall approve all products/services to be offered and/or launched by the MIB.
- iii. The SB shall ensure that all the MIB's products and services and related agreements/ contracts, structures, process flows, product manuals, marketing advertisements, sales illustrations and brochures etc. are in conformity with the rules and principles of Shari'ah. The executive management while seeking the SB's decision on any proposal shall ensure provision of all the necessary information, details and documents enabling the SB to have adequate understanding of the product, its process flows, business and economic outcomes and Shari'ah permissibility or impermissibility.
- iv. The Shari'ah Board shall have unhindered access to all records, documents and information from all sources including professional advisors and MIB's employees in discharge of its duties.
- v. Considering the importance of the SB's decisions and their binding nature, the SB shall rigorously deliberate on the proposals before giving any decision/fatwa; all such deliberations and rationale for allowing or disallowing a particular product/service etc. shall be duly recorded and documented.
- vi. All the reports of internal/external Shari'ah audit and Shari'ah compliance reviews shall be submitted to the SB for prescribing appropriate enforcement action. SB shall take up the unresolved issues with the management and if warranted shall include the outstanding issues in their annual Shari'ah Board Report. Moreover, Head of SCD and RSBM shall discuss all the significant and unresolved issues with SBP inspection team during on-site inspection.
- vii. The SB shall also specify the process/procedures for changing, modifying or revisiting Fatawas/Rulings/Guidelines etc. already issued by SB.

### Meetings of Shari'ah Board held in 2020

| S. No | Quarter | Date of Meeting | Meeting Attended (Yes / No) |        |      |
|-------|---------|-----------------|-----------------------------|--------|------|
|       |         |                 | Chairman                    | Member | RSBM |
| 1     | Q1      | 20-Mar-20       | Yes                         | Yes    | Yes  |
| 2     | Q2      | 25-Jun-20       | Yes                         | Yes    | Yes  |
| 3     | Q3      | 14-Sep-20       | Yes                         | Yes    | Yes  |
| 4     | Q4      | 29-Dec-20       | Yes                         | Yes    | Yes  |

### Meetings of Shari'ah Board-Board of Directors held in 2020

| S. No | Half Year | Date of Meeting | Meeting Attended (Yes / No) |        |      |
|-------|-----------|-----------------|-----------------------------|--------|------|
|       |           |                 | Chairman                    | Member | RSBM |
| 1     | 1st       | 21-Apr-20       | Yes                         | Yes    | Yes  |
| 2     | 2nd       | 29-Dec-20       | Yes                         | Yes    | Yes  |

### Membership on Shari'ah Board of other Companies

| S. No | Name of Members          | Date of Joining/ Leaving the Board | Status of Member- Chairman/ Resident member/ Non Resident Member | Number of Other Board Memberships along with name of companies |
|-------|--------------------------|------------------------------------|------------------------------------------------------------------|----------------------------------------------------------------|
| 1     | Mufti Munib-ur-Rehman    | 15-Sep-15                          | Chairman                                                         | 1. Chairman Shari'ah Supervisory Board                         |
| 2     | Mufti Syed Sabir Hussain | 16-Sep-15                          | Resident Member                                                  | 1. Shari'ah Supervisory Board Member / Consultancy             |
| 3     | Mufti Nadeem Iqbal       | 15-Oct-18                          | Non Resident Member                                              | No other engagement                                            |

# Report of Shari'ah Board

(For the Year ended December 31, 2020)

بِسْمِ اللَّهِ الرَّحْمَنِ الرَّحِيمِ

الْحَمْدُ لِلَّهِ رَبِّ الْعَالَمِينَ وَالصَّلَاةُ وَالسَّلَامُ عَلَى خَاتَمِ الْأَنْبِيَاءِ وَالْمُرْسَلِينَ وَعَلَى آلِهِ وَصَحْبِهِ أَجْمَعِينَ أَمَّا بَعْدُ

The Shari'ah Board (SB) of MCB Islamic Bank Ltd. (MIB) was constituted in September, 2015. Currently Shari'ah Board comprises of respected Professor Mufti Munib-ur-Rehman as Chairman Shari'ah Board, Mufti Syed Sabir Hussain as Resident Shari'ah Board Member (RSBM) and Mufti Nadeem Iqbal as Member Shari'ah Board. Despite tough conditions of COVID – 19 all Shari'ah Board Members remain available throughout the year and many meetings were held through audio and video conferencing. In addition to that formal meeting of Shari'ah Board were held four times during the year 2020 on the following dates to review various matters which apart from other matters, include new products and services, product modifications, concepts, transactions, structures, processes and Shari'ah issues, referred to them:

|                               |   |                    |
|-------------------------------|---|--------------------|
| First Shari'ah Board Meeting  | – | March 20, 2020     |
| Second Shari'ah Board Meeting | – | June 25, 2020      |
| Third Shari'ah Board Meeting  | – | September 14, 2020 |
| Fourth Shari'ah Board Meeting | – | December 29, 2020  |

In order to assist the SB to supervise all these matters throughout the year, the Shari'ah Compliance Department ensured that, apart from the SB meetings, it closely coordinate with SB. This result in continuous involvement of SB on Shari'ah affairs of the Bank as well as enabled them to approve, by way of circulation, different matters in a timely manner.

1. While the Board of Directors and Executive Management are solely responsible to ensure that the operations of MIB are conducted in a manner that comply with Shari'ah principles at all times, we are required to submit a report on the overall Shari'ah compliance environment of MIB. During the year 2020 Shari'ah Board's held meetings with Board of Directors on the following dates:

|                                                     |   |                   |
|-----------------------------------------------------|---|-------------------|
| First Shari'ah Board – Board of Directors' Meeting  | – | April 21, 2020    |
| Second Shari'ah Board – Board of Directors' Meeting | – | December 29, 2020 |

2. To form our opinion as expressed in this report, the Shari'ah Compliance Department (SCD) of MIB carried out reviews of each type of transactions, products, process flows/modus operandi and concepts under the supervision of RSBM/Head Shari'ah Compliance. SCD informed Shari'ah board regarding Shari'ah compliance review activities of Front and Back Offices of MIB during tough conditions of COVID-19 in the country. In 3rd Shari'ah Board meeting FTY – 2020 Shari'ah Board and CEO approved one-third (33%) waiver in assigned tasks of Shari'ah Compliance program – 2020 due to COVID-19 in the country, a list of such branch and non-branch entities were approved by Shari'ah Board. In this regard, 122 branches have been inspected for Shari'ah compliance with strict compliance of COVID-19 related SOPs and as far as Shari'ah compliance review of non-branch is concerned, it has been ensured to comply with approved list of Shari'ah Board with one-third (33%) waiver. In order to enhance the Islamic Banking and Finance knowledge and expertise of branch & non-branch entities' staff members; Shari'ah trainings were made mandatory for all staff of MIB with the coordination of Learning & Development Department (L&D – HRG).
3. Four (4) Instructions & Guidelines and Four (4) Fatawa by the Shari'ah Board of the MIB are in vogue without any changes. All Fatawas & Instructions and Guidelines issued by Shari'ah Board of the MIB are being implemented in the MIB in true letter and spirit.
4. SCD with the coordination of management and under the supervision of RSBM/Head Shari'ah Compliance has reviewed various Product documents and SB reviewed and approved 77 modus operandi out of which 28 for Corporate Banking, 29 for Commercial Banking, 04 for SME Banking and there were 16 Standard process flows. As far as Products are concerned, SB issued 57 Shari'ah Vetting Certificates related to products, 19 for Consumer Car Finance, Housing Finance and Murabaha Microfinance which also includes Mera Pakistan-Mera Ghar Housing Finance Scheme & Review of Prime Minister's Kamyab Jawan Scheme has been completed and hopefully it will be launched in January, 2021, 29 for Corporate/Commercial/SME Banking, 5 for Liability Products and there were 2 each for Staff Financing and Banca Takaful products in the year 2020.
5. SCD has also facilitated Islamic Banking training sessions for the front and back offices staff of MIB. For compliance with regulatory instructions L&D not only arranged class room sessions but also uploaded Online Islamic Banking training modules at Learning Management Systems (LMS) for the easy access of Islamic Banking & Finance knowledge to staff. Despite the difficult conditions due to COVID-19, L&D was determined to adhere to cover the

Islamic Banking & Finance trainings of its staff. Therefore, this year L&D has started Virtual classroom session with facilitation of SCD for the safety of staff and it allows learning for all by overcoming geographical obstacles.

Moreover, in view of COVID-19 conditions L&D-HRG has taken initiatives to establish an effective and comprehensive Islamic Banking training mechanism in compliance with IBD Circular No. 02 of 2018, Dated: Jun 29, 2018, "Enhanced Training & Capacity Building Measures for Islamic Banking Institutions (IBIs)" issued by Islamic Banking Department, State Bank of Pakistan, for MIB front and back offices staff at all levels. SCD's staff facilitated as internal trainers on the Shari'ah related training initiatives during the year. Furthermore, alongside regulatory requirements of executive management Shari'ah trainings, L&D and SCD have jointly developed Islamic Banking & Finance Module and AAOIFI Shari'ah Standards Module for capacity building of Executive Management, which will be launched during 2021.

6. Shari'ah Board praises and encourages the continuous, comprehensive & profound efforts and commitment of MIB's Board of Directors and the Management regarding implementation of all instructions and guidelines issued by Shari'ah Board especially under the tough conditions of COVID-19.

### Recommendations:

Based on the observations made through Shari'ah review reports and Shari'ah Compliance checks, it is recommended that:

- i. In future, there shall be more Shari'ah Trainings in compliance with regulatory requirements. There should be a comprehensive mechanism to cater situations like COVID-19 to ensure continuity and compliance of Shari'ah Trainings.
- ii. More focus is needed on Product & Shari'ah trainings of Corporate, Commercial & SME banking and it is strongly recommended to ensure mandatory Product & Shari'ah trainings of the staff members before launching new products. Further there must be additional focus on training of Products which require complex calculations particularly in Musharakah Running Finance, as some issues were found in its transactional calculation during the Shari'ah Compliance review.
- iii. It is recommended to arrange general public awareness programs like, Seminars, Workshops and Question & Answer Sessions from MIB platform for building up the true image of Islamic Banking & Finance as well as creating awareness/removing misconception about Islamic banking.
- iv. Shari'ah trainings of MIB higher management is strongly recommended.
- v. It is recommended and emphasized to continue with Microfinance activities and MIB should encourage the Islamic Microfinance due to its requirement in the country. Through Islamic Microfinance, Islamic Banking Industry can penetrate at grass-root level to facilitate micro level traders.
- vi. The newly deployed Pool Management System is currently facing challenges towards fulfillment of unique customers' requirements that results in some adjustments at the time of profit distribution. It is recommended to get these improvements in Pool Management System to avoid any regulatory non-compliance.
- vii. Usage of Islamic Banking terminologies must be ensured during MIB's activities. As far as internal environment of the bank is concerned, all staff members of front and back offices are strongly recommended to follow the proper dress code strictly, which should be in line with MIB Dress code policy, cultural norms, and reflect due modesty as required by the dictates of Shari'ah.

### Conclusion:

Shari'ah Board has reviewed & advised corrective measures on SBP Inspection Report, the External & Internal Shari'ah Audit and Shari'ah Compliance Inspection reports and is of the view that:

- i. MIB has complied with Shari'ah rules and principles in the light of Fatawa, Instructions and Guidelines issued by Shari'ah Board.
- ii. MIB has complied with SBP Inspection report in true letter and spirit.
- iii. MIB has complied with directives, regulations, instructions and guidelines related to Shari'ah compliance issued by SBP in accordance with the rulings of SBP's Shari'ah Advisory Committee.
- iv. MIB has a comprehensive mechanism in place to ensure Shari'ah Compliance in their overall operations.
- v. As far as Charity fund is concerned, separate liability account (non-chequing) is opened in separate General Ledgers for each type of Charity Fund Collection



- a. Charity due to late payment,
- b. Charity due to void transactions and
- c. Amount due to non-purification of dividend.

Funds cumulated in above mentioned each type of "Charity Collection Fund Account" is maintained in Shari'ah Compliant remunerative account at the discretion of Shari'ah Board/Resident Shari'ah Board Member.

Charity Fund is utilized for charitable, social welfare, religious, educational or any other purposes approved by Charity Committee /Shari'ah Board.

**In the year 2020 the addition in the amount of Charity was PKR 45.333 million from different heads which was instructed to transfer to the Charity account.**

| <b>Additions in Charity account during the year</b>       | Rupees in 000s |
|-----------------------------------------------------------|----------------|
| - Received from customers against late payment            | 42,477         |
| - Dividend purification amount                            | 771            |
| - Profit on Charity saving account                        | 2,085          |
| - <b>Charity due to void transactions</b>                 | <b>Nil</b>     |
| <b>Total additions in Charity account during the year</b> | <b>45,333</b>  |

The bank has disbursed the Charity amount to Shari'ah approved charitable organizations as per MIB's charity policy and SBP's guidelines. Details of Charity account are available in the note # 19.2. Further it is note able that during the year, there was no addition in Charity account due to any non-Shari'ah compliant transaction of the bank. It shows the strict compliance and control of SB's instructions and guideline, SBP's regulations and internal policies of the Bank. Shari'ah Board would like to praise Shari'ah Compliance Department/RSBM for such efforts made by SCD during tough times of COVID-19.

- vi. MIB has complied with the SBP instructions on profit and loss distribution and pool management.
- vii. While the Bank is actively pursuing training of its human resources about various aspects of Islamic Banking & Finance through training sessions/seminars, however further improvement is required to enhance the level of awareness of Islamic Banking & Finance of the staff, management and the BOD through enhanced training mechanism for each level. The management and the BOD have made sincere efforts and appreciate the importance of Shari'ah compliance in overall operations of MIB.
- viii. The Shari'ah Board has been provided adequate resources enabling it to discharge its duties effectively.

Shari'ah Board praises and acknowledged the efforts of Shari'ah Compliance Department/RSBM of MCB Islamic Bank Ltd. that besides Shari'ah Compliance environment of the bank in regulatory inspection there was no instance regarding Non-compliance of regulatory requirements as far as Shari'ah Governance Framework is concerned.

Shari'ah Board would like to take this opportunity to offer praise to Almighty ALLAH and seek his guidance and Tauwfeeq, and to express its wishes for further progress, development and prosperity of Islamic Banking, Alhamdulillah under the sincere efforts of senior management, and Islamic Banking industry in Pakistan as a whole.

وَاللَّهُ سُبْحَانَهُ وَتَعَالَىٰ أَعْلَمُ

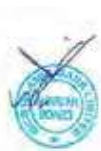

**Mufti Syed Sabir Hussain**  
Resident Shari'ah Board Member

*Munib ur Rehman*

**Professor Mufti Munib-ur-Rehman**  
Chairman Shari'ah Board

**Mufti Nadeem Iqbal**  
Member Shari'ah Board

**Date of Report: January 21, 2021.**



مزید یہ کہ کووڈ-19 کے حالات کو پیش نظر رکھتے ہوئے ایسٹ بینک آف پاکستان کے اسلامی بینکاری ڈیپارٹمنٹ کی جانب سے جاری کردہ سرکلر (نمبر ۲۰۱۸/۲۰۱۸ تا ریخ ۲۹ جون ۲۰۱۸ء) پر عملدرآمد کو یقینی بنانے کے لئے مؤثر اور جامع اقدامات کئے گئے۔ لہذا ایک پراثر اور جامع پروگرام L&D-HRG کی طرف سے ترتیب دیا گیا، جس کے تحت بینک کے ہر درجہ کے فرنٹ اور بیک آفس اسٹاف کو اسلامی بینکاری کی ٹریننگ دی گئی۔ شرعی کمپلائنس ڈیپارٹمنٹ کے اسٹاف ممبرز نے شرعی ٹریننگ کے لئے پورا سال اپنی خدمات دیں۔ مزید برآں، ایگزیکٹو مینجمنٹ کی شرعی ٹریننگ کی ریگولیری ضروریات کے ساتھ ساتھ L&D اور شرعی کمپلائنس ڈیپارٹمنٹ نے مل کر ایگزیکٹو مینجمنٹ کی مہارت کو مزید بڑھانے کی غرض سے اسلامی بینکاری اور AAOIF کے جاری کردہ شرعی معیارات کے کورسز تیار کئے ہیں، جو ۲۰۲۱ء کے دوران شروع کر دیئے جائیں گے۔

۶ شرعی بورڈ اپنی جاری کردہ ہدایات والا عمل پر عملدرآمد کے اعتبار سے خاص طور پر کووڈ-19 کے مشکل حالات میں بینک کے منتظمین کی مسلسل اور جامع کوششوں کی تعریف اور نعت افزائی کرتا ہے۔  
سفارشات:

شرعی بورڈ شرعی اعتبار سے کئے گئے جائزوں کی جانچ پڑتال کے بعد درج ذیل سفارشات پیش کرتا ہے:

- الف۔ مستقبل میں، ریگولیری تقاضوں کی تعمیل میں مزید شرعی ٹریننگز ہونی چاہئیں۔ شرعی ٹریننگ کے تسلسل اور تعمیل کو یقینی بنانے کے لئے کووڈ-19 جیسے حالات کے لئے ایک جامع طریقہ کار ہونا چاہئے۔
- ب۔ کارپوریٹ، کمرشل اور ایس ایم ای بینکاری کی پروڈکٹس اور شرعی ٹریننگز پر زیادہ توجہ دینے کی ضرورت ہے اور نئی پروڈکٹس کو شروع کرنے سے قبل اسٹاف کی لازمی پروڈکٹ اور شرعی ٹریننگ کو یقینی بنانے کی بھرپور سفارش کی جاتی ہے۔ اس کے علاوہ ایسی پروڈکٹس کی ٹریننگ پر بھی زیادہ توجہ دینی ہوگی، جن کے لئے خاص طور پر پیچیدہ حساب و کتاب کی ضرورت ہوتی ہے جیسا کہ مشارکہ رنگ فنانس، کیونکہ شرعی تعمیل کے جائزے کے دوران مشارکہ رنگ فنانس کے حساب و کتاب کے معاملات میں کچھ مسائل پائے گئے۔
- ج۔ اسلامی بینکاری اور مالیات کی اصل روح کی تفسیر اور عام لوگوں کو آگاہی دینے کے ساتھ ساتھ اسلامی بینکاری کے بارے میں شعور پیدا کرنے اور غلط فہمیوں کو دور کرنے کے لئے، ایم آئی بی کے پبلٹ فارم سے سیمینارز، ورکشاپس اور سوال و جواب کے سیشنز کا اہتمام کرنے کی سفارش بھی کی جاتی ہے۔
- د۔ ایم آئی بی کے اعلیٰ منتظمین کی شرعی ٹریننگ کی بھرپور سفارش کی جاتی ہے۔
- ہ۔ مائیکروفنانس سرگرمیوں کو جاری رکھنے کی ضرورت ہے۔ ایم آئی بی کو ملک میں مائیکروفنانس کی ضرورت کے سبب اسلامی مائیکروفنانس کی حوصلہ افزائی کرنی چاہئے۔ اسلامی مائیکروفنانس کے ذریعے، اسلامی بینکاری انڈسٹری کم سرمایہ کے ساتھ کام کرنے والے تاجروں کی سہولت کے لئے ابتدائی درجہ پر کام کر سکتی ہے۔
- و۔ موجودہ نئے پبل مینجمنٹ سسٹم کے ذریعے فی الحال مندرجہ ذیل ضروریات کی تکمیل مشکلات کا سامنا کر رہی ہے، جس کے نتیجے میں منافع کی تقسیم کے وقت کچھ مسائل کا سامنا کرنا پڑتا ہے۔ کسی بھی ریگولیری عدم تعمیل سے بچنے کے لئے نئے پبل مینجمنٹ سسٹم میں بہتری لانے کی سفارش کی جاتی ہے۔
- ز۔ ایم آئی بی کی سرگرمیوں کے دوران اسلامی بینکاری اصطلاحات کے استعمال کو یقینی بنانا ہوگا۔ جہاں تک بینک کے داخلی ماحول کا تعلق ہے تمام عملے کے فرنٹ اور بیک آفس کے اسٹاف کو لباس و وضع قطع کے حوالے سے مندرجہ ذیل امور وضوابط کی تعمیل سے بیرونی کرنے کی تاکید کی جاتی ہے تاکہ اسٹاف کا بیرون ایم آئی بی ڈریس کوڈ پالیسی، ثقافتی اصولوں اور شرعی تقاضوں کے مطابق شائستہ مزاج کی عکاسی کرتا ہو۔

خلاصہ کلام:

شرعی بورڈ نے ایس بی پی معائنہ رپورٹ، بیرونی اور داخلی شرعی آڈٹ اور شرعی کمپلائنس کی رپورٹس کو دیکھنے کے بعد اصلاحی اقدامات کے لئے ہدایات دیں، لہذا شرعی بورڈ کے مطابق:

- الف۔ ایم آئی بی نے شرعی بورڈ کے جاری کردہ فتاویٰ حیات اور ہدایات والا عمل کے مطابق شرعی اصول و ضوابط کو پورا کیا ہے۔
- ب۔ ایم آئی بی نے حقیقی معنوں میں اصل روح کو مد نظر رکھتے ہوئے ایس بی پی انٹیکشن رپورٹ پر عملدرآمد کیا ہے۔
- ج۔ ایم آئی بی، ایسٹ بینک آف پاکستان کے احکامات، قوانین و ہدایات اور الاٹھ عمل (جو ایسٹ بینک آف پاکستان کے شرعی بورڈ کے احکام کے مطابق ہیں) سے ہم آہنگ ہے۔
- د۔ شرعی کمپلائنس کو یقینی بنانے کے لئے ایم آئی بی کے پاس ایک جامع طریقہ کار موجود ہے۔
- ہ۔ جہاں تک چیرینی فنڈ کا تعلق ہے، ہر طرح کے چیرینی فنڈ جمع کرنے کے لئے علیحدہ نان چیکنگ، ایکٹیوٹی اکاؤنٹ کھولے جاتے ہیں۔
- ا۔ ادائیگی میں تاخیر کی وجہ سے چیرینی،
- ii. باطل معاملات کی وجہ سے چیرینی، اور
- iii. منافع سے غیر شرعی منافع منہا کرنے کی وجہ سے چیرینی۔

عام طور پر مذکورہ بالا تمام مدت میں جمع کی گئی رقم اپنے اپنے "شرعی کمپلائنس فنڈ" میں چیرینی کی پیش کش چیرینی کی پیش کش فنڈ اکاؤنٹ "میں شرعی بورڈ ریزریڈنٹ شرعی بورڈ ممبر کی صوابیہ پر جمع کی جاتی ہے، چیرینی فنڈ، چیرینی کمپنی شرعی بورڈ کے منظور شدہ کسی خیراتی، معاشرتی، بہبود، مذہبی یا تعلیمی مقاصد کے لئے استعمال ہوتا ہے۔

سال ۲۰۲۰ء میں چیرینی فنڈ کی مختلف مدت میں جمع کی گئی رقم میں کل اضافہ ۴۵,۳۳۳ ملین روپے، جس کو چیرینی اکاؤنٹ میں منتقل کرنے کی ہدایت کی گئی۔

| روپے (000) میں | آسٹ چیرینی فنڈ میں اضافہ                        |
|----------------|-------------------------------------------------|
| ۴۲,۴۷۷         | صارف کی طرف سے ادائیگی میں تاخیر کی وجہ سے      |
| ۷۷۱            | منافع میں سے غیر شرعی منافع منہا کرنے کی وجہ سے |
| ۲,۰۸۵          | چیرینی سیونگ اکاؤنٹ پر منافع                    |
| کوئی نہیں      | باطل معاملات کی وجہ سے                          |
| ۴۵,۳۳۳         | آسٹ چیرینی فنڈ میں کل اضافہ                     |

## شریعی بورڈ رپورٹ

(مالی سال اختتام پذیر ۳۱ دسمبر ۲۰۲۰ء)

بِسْمِ اللّٰهِ الرَّحْمٰنِ الرَّحِیْمِ

الْحَمْدُ لِلّٰهِ رَبِّ الْعَالَمِیْنَ وَالصَّلٰوةُ وَالسَّلَامُ عَلٰی خَاتَمِ الْاَنْبِیَاءِ وَالْمُرْسَلِیْنَ وَعَلٰی اٰلِهِ وَصَحْبِهِ اَجْمَعِیْنَ اَمَّا بَعْدُ

ایم ای بی اسلامک بینک (ایم آئی بی) کا شریعی بورڈ ستمبر ۲۰۱۵ء کو تشکیل پایا، موجودہ شریعی بورڈ پروفیسر مفتی شب الزمیں چیئر مین شریعی بورڈ، مفتی سید صابر حسین ریڈینٹ شریعی بورڈ ممبر اور مفتی ندیم اقبال ممبر شریعی بورڈ پر مشتمل ہے۔ ۲۰۲۰ء میں پورا سال کوڈ-19 کی وجہ سے پیش آنے والے سخت ترین حالات کے باوجود شریعی بورڈ کی خدمات ادارے کو حاصل رہیں، بینک کے معاملات کے حوالے سے شریعی بورڈ نے ٹیلی فون اور ویڈیو کانفرنس کالز کے ذریعے بھی کئی غیر رسمی ملاقاتیں کیں۔ علاوہ ازیں ۲۰۲۰ء میں شریعی بورڈ کے ۳ ری اجلاس درج ذیل تاریخوں میں منعقد ہوئے، جس میں دیگر امور کے علاوہ نئی پراڈکٹس اور خدمات کے ساتھ ساتھ موجودہ پراڈکٹس اور خدمات میں ترامیم کا شرعی جائزہ بھی لیا گیا۔

|   |                            |                |
|---|----------------------------|----------------|
| ☆ | شریعی بورڈ کا پہلا اجلاس،  | ۲۰ مارچ ۲۰۲۰ء  |
| ☆ | شریعی بورڈ کا دوسرا اجلاس، | ۲۵ جون ۲۰۲۰ء   |
| ☆ | شریعی بورڈ کا تیسرا اجلاس، | ۱۳ ستمبر ۲۰۲۰ء |
| ☆ | شریعی بورڈ کا چوتھا اجلاس، | ۲۹ دسمبر ۲۰۲۰ء |

مندرجہ بالا شریعی بورڈ کی مجالس کے علاوہ بھی سال بھر تمام امور کی شریعی بورڈ کی جانب سے نگرانی میں شریعی کمپلائنس ڈیپارٹمنٹ نے شریعی بورڈ کے ساتھ ہم آہنگی کو یقینی بنایا، جس کے نتیجے میں شریعی بورڈ کی بینک کے شرعی امور میں مستقل شمولیت اور بروقت منظوری کو یقینی بنایا گیا۔

۱ بورڈ آف ڈائریکٹرز اور ایگزیکٹو مینٹین اس امر کے ذمہ دار ہیں کہ ایم آئی بی کے جملہ معاملات شریعت مطہرہ کے اصولوں کے عین مطابق ہوں، لہذا ہم (شریعی بورڈ) ایم آئی بی کے شریعی کمپلائنس کی مجموعی صورت حال کے بارے میں ایک رپورٹ جمع کرانے کے ذمہ دار ہیں۔ ۲۰۲۰ء میں شریعی بورڈ کے بورڈ آف ڈائریکٹرز کے ساتھ ۲ ری اجلاس درج ذیل تاریخوں میں منعقد ہوئے:

|   |                                                |                |
|---|------------------------------------------------|----------------|
| ☆ | شریعی بورڈ - بورڈ آف ڈائریکٹرز کا پہلا اجلاس،  | ۲۱ اپریل ۲۰۲۰ء |
| ☆ | شریعی بورڈ - بورڈ آف ڈائریکٹرز کا دوسرا اجلاس، | ۲۹ دسمبر ۲۰۲۰ء |

۲ رپورٹ میں ظاہر کردہ امور کے مطابق اپنی رائے دیتے ہوئے عرض یہ ہے کہ ایم آئی بی کے شریعی کمپلائنس ڈیپارٹمنٹ نے ریڈینٹ شریعی بورڈ ممبر ہڈ شریعی کمپلائنس ڈیپارٹمنٹ کی زیر نگرانی تمام قسم کے مالی معاملات، پراڈکٹس، معاملات کے مراحل اور نظریات کا جائزہ لیا ہے۔ شریعی کمپلائنس ڈیپارٹمنٹ نے شریعی بورڈ کو فرٹ اور بیک آفسز کے شریعی کمپلائنس جائزے کی سرگرمیوں کے حوالے سے کوڈ-19 میں پیش آنے والے سخت ترین حالات سے آگاہ کیا۔ ۲۰۲۰ء میں شریعی بورڈ کے تیسرے اجلاس میں شریعی بورڈ اور بینک کے ریڈینٹ نے شریعی کمپلائنس پروگرام کے مختص کردہ کاموں میں ایک تہائی (۳۳%) کمی کی منظوری ملک میں موجود کوڈ-19 کے پیش نظر دی، شریعی بورڈ نے باقی رہ جانے والی برائچوں اور گروپس رڈ ویز نڈ پراڈکٹس کے شریعی کمپلائنس جائزے کی فہرست کی باقاعدہ منظوری دی۔ اس حوالے سے کوڈ-19 سے متعلق ایس او پی کی سخت قیصل کے ساتھ ایم آئی بی کی ۱۲۲ برانچوں کا شرعی اعتبار سے جائزہ لیا گیا اور گروپس رڈ ویز نڈ پراڈکٹس کے شریعی کمپلائنس جائزے کو شریعی بورڈ کی منظور کردہ فہرست کے مطابق ایک تہائی (۳۳%) کمی کے ساتھ یقینی بنایا گیا۔ اسلامی بینکاری کے بارے میں تمام برانچوں اور گروپس رڈ ویز نڈ پراڈکٹس کی ان کے کام کی نوعیت کے اعتبار سے معلومات اور مہارت کو بروحا نے کی غرض سے شریعی کمیٹی ریومن ریپورٹس ڈیپارٹمنٹ کے تعاون سے تمام اسٹاف کے لئے لازم قرار دی گئی۔

۳ ایم آئی بی کے شریعی بورڈ کی جاری کردہ ۳ ہدایات والا لائحہ عمل اور ۴ فتاوی جات بغیر کسی تبدیلی کے موجود ہیں۔ ایم آئی بی میں شریعی بورڈ کی جاری کردہ تمام ہدایات والا لائحہ عمل اور فتاوی جات پر عملدرآمد کو ان کی اصل روح کے مطابق یقینی بنایا گیا۔

۴ بینک کے منتظمین کے تعاون سے شریعی کمپلائنس ڈیپارٹمنٹ نے ریڈینٹ شریعی بورڈ ممبر ہڈ شریعی کمپلائنس ڈیپارٹمنٹ کی زیر نگرانی ۲۰۲۰ء میں ان تمام پراڈکٹس کی دستاویزات کا جائزہ لیا اور شریعی بورڈ نے ۷۷ فنانسنگ کے لائحہ عمل کی دستاویزات جن میں سے ۲۸ کارپوریٹ بینکاری، ۲۹ کمرشل بینکاری، ۰۳ ایس ایم ای بینکاری اور ۱۶ تمام صارفین کے لئے استعمال کئے جاسکتے والے فنانسنگ کے لائحہ عمل کا جائزہ لیا اور ان کی منظوری بھی دی۔ جہاں تک پراڈکٹس کا تعلق ہے، شریعی بورڈ نے ۷۷ شرعی منظوری کے شمولیت جاری کئے، جن میں سے ۱۹ کنزیومر کار فنانسنگ، ہاؤس فنانسنگ، مراہجہ و فائیکس شامل ہیں، اس میں میرا پاکستان میرا گھر ہاؤسنگ فنانسنگ بھی شامل ہے اور پرائمری شہر کامیاب جوان اسکیم کا شرعی جائزہ بھی مکمل کیا جا چکا ہے، جو کہ جنوری ۲۰۲۱ء میں جاری کردی جانے گی۔ ۲۹ شرعی معائنہ شمولیت کا تعلق کارپوریٹ، کمرشل اور ایس ایم ای بینکاری سے ہے، جبکہ ۵ لائیکٹیٹی پراڈکٹس، ۲ اسٹاف فنانسنگ اور ۲۷ تعلق بینک لائحہ عمل سے ہے۔

۵ شریعی کمپلائنس ڈیپارٹمنٹ نے بینک کے فرٹ اور بیک آفس اسٹاف کے لئے اسلامی بینکاری کی ٹریننگ کے کئی پروگرامز منعقد کئے ہیں۔ مزید برآں اسٹیٹ بینک آف پاکستان کے اسلامی بینکاری ڈیپارٹمنٹ کی جانب سے جاری کردہ ہدایات پر عملدرآمد کو یقینی بنانے کے لئے کلاس روم سیشنز کا انعقاد کیا گیا، اس کے علاوہ رننگ مینجمنٹ سسٹم کے ذریعے آن لائن کورسز کرائے گئے، جس نے اسٹاف کے لئے اسلامی بینکاری کی معلومات تک رسائی کو آسان بنایا۔ کوڈ-19 کی وجہ سے مشکل حالات کے باوجود، L&D نے اپنے اسٹاف کی اسلامی بینکاری اور مالیات کی تربیت کا عزم کیا۔ لہذا اس سال L&D نے عملے کی کوڈ-19 سے حفاظت کو مد نظر رکھتے ہوئے شریعی کمپلائنس ڈیپارٹمنٹ کے تعاون سے ورچوئل کلاس روم سیشنز کا آغاز کیا، جس کی وجہ سے جغرافیائی رکاوٹوں سے نکل کر اسٹاف کے لئے سیکھنے کے مواقع میسر آئے۔

## Sustainability & Corporate Social Responsibility

As a leader in the Pakistani banking sector, MCB Bank has a great legacy in looking after the preservation of the interests of all our stakeholders. Our employees fully embody our values of service and quality.

Through careful evaluation and selection, the Bank selects and promotes projects and services that benefit the Pakistani economy and society in the most effective manner. Particular emphasis is placed upon the need to promote environmental sustainability and social welfare.

### Our policy

We ensure that CSR initiatives embody a vision of harmonious and sustainable development in Pakistani communities. Broadly speaking, the pillars of CSR activities undertaken by the Bank ensure:

1. Compliance with relevant laws and regulations both in letter and spirit
2. Business operations with honesty and integrity
3. Engagement in social welfare activities that help strengthen communities and contribute towards the uplift of society
4. Support and promote financial inclusion and literacy
5. To build and maintain sound relationships with customers and other stakeholders through open and fair communication in order to contribute towards sustainable image-building
6. Respect for culture, customs, history and laws as the Bank constantly searches for safer, cleaner and better practices that meet the growing needs of society
7. Minimize environmental footprint to coexist harmoniously whilst encouraging minimum wastage of resources

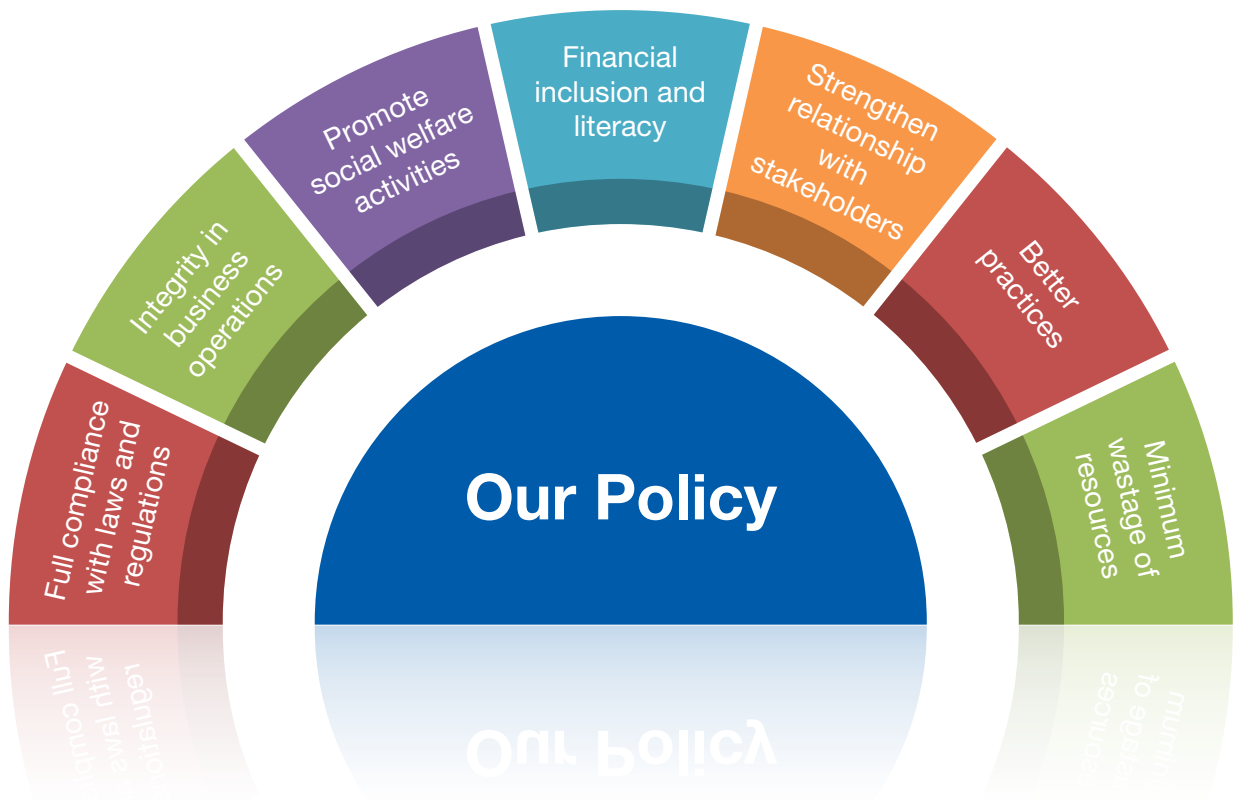

### Our approach to sustainability

The Bank has focused on several key principles as an institution. It is committed towards fostering a better work place and cleaner environment through its varied initiatives. By committing to a culture of excellence, good governance, transparency and integrity, it ensures that all activities are conducted in a manner that is ethically responsible and beneficial for all stakeholders. MCB Bank has a well-defined Code of Ethics and Conduct policy that serves as a guideline for the behavior and ethics of employees.

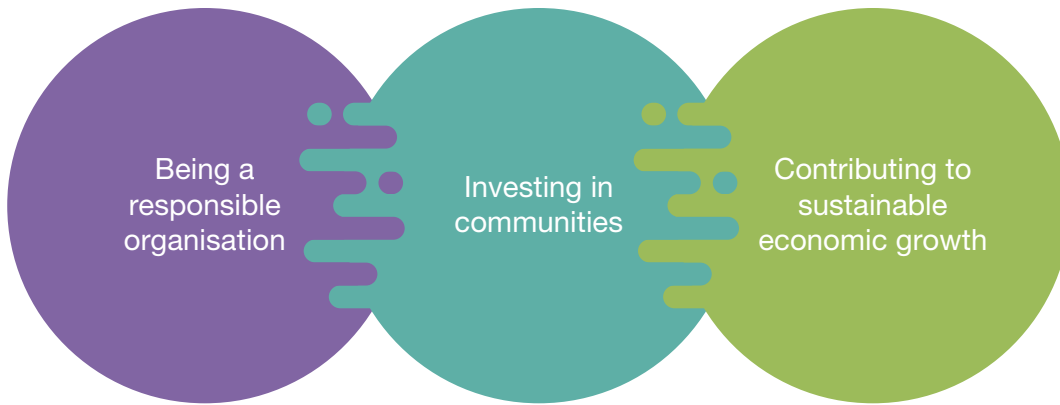

### Contributing to sustainable economic growth

MCB Bank uses its core business of banking to promote sustainable development in all the markets it operates in.

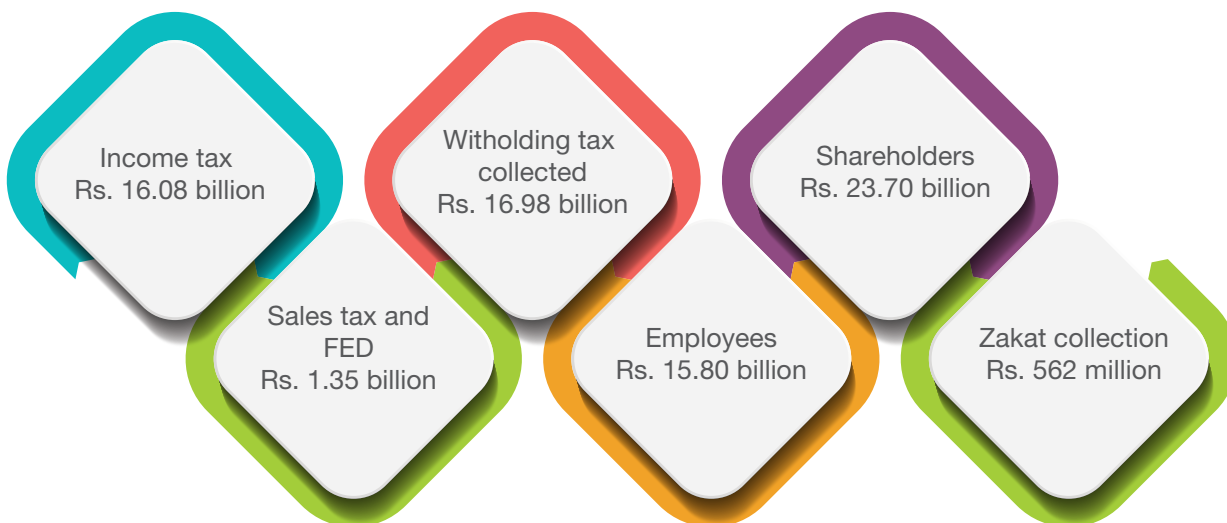

### Contribution to Economy & National Exchequer

MCB Bank has the highest market capitalization in the banking industry. In 2020, the Bank paid approximately PKR 16.08 billion on account of income taxes to Government Treasury and collected over PKR 16.98 billion for the National Exchequer as withholding tax agent under different provisions of Income Tax Ordinance 2001. In addition, the Bank has also paid PKR 1.35 billion in respect of sales tax and FED.

The contribution by the Bank to the national economy by way of value addition was PKR 68.48 billion, out of which around PKR 15.80 Billion were distributed to employees and PKR 23.70 billion to shareholders.

Zakat is an essential component in delivering assistance to those most in need. The Bank bolstered the zakat collection efforts of prominent public welfare organisations such as Shaukat Khanum and Edhi Welfare Organisation through its communication mediums such as MCB Mobile Banking, MCB Internet Banking and ATM Screens. MCB Bank also contributed to the national exchequer in Zakat Deductions to the sum of PKR 562 million.

The Bank is making significant contribution to the development and growth of the country.

An analysis of the Bank’s value creation and allocation of value among key stakeholder groups is represented in Statement of Value Added.

### Key financial highlights

Key financial figures and related ratios are discussed in financial performance section.

### Being a responsible organization

Our foremost duty is to create a platform which reflects our values. We do this by making the right investments in developing our human resources, protecting the interests of our customers, weighing environmental impact in our decision making and combating the scourge of corruption with our best practices.

The Bank's policies therefore address these key aspects:

- Measures to combat COVID-19 pandemic
- Occupational health and safety
- Business continuity management
- Business ethics and anti-corruption measures
- Quality checks and mystery shopping
- Service council
- Customer experience management
- Turnaround Time (TAT) monitoring
- Consumer protection measures

#### Measures to Combat COVID-19 Pandemic

With the onset of the COVID-19 pandemic during Q1-2020, the Bank took immediate measures to offset the risks associated with the rapidly spreading pandemic. While ensuring that day to day business was not adversely impacted, the safety and security of all employees and valued customers was a key priority. The following steps were implemented with immediate effect while applying out of the box strategic planning and execution within stringent timelines:

- Immediate reduction of staff at branches and back offices via adaptation and improvisation of workplace dynamics
- Daily attendance reporting detailing staff strength at Head Office/key buildings and branches
- Effective implementation and review of regulation directed SOPs at all back office buildings and branches (including the deployment of sanitizers, thermal guns, masks)
- Arrangement of staff testing at branches, buildings, alongside reimbursement for individual staff testing
- Utilization of alternate building spaces to relocate critical staff while ensuring social distancing measures
- Creation of an alternate fully functional working environment for Bank's senior management in the eventuality of an emergency evacuation required at the Head Office

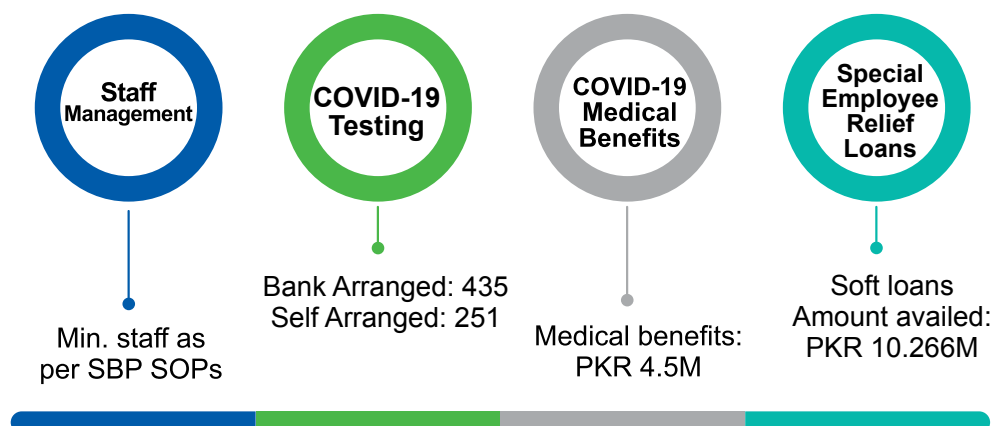

Collaborative measures implemented by the Bank to ensure staff and customer safety during the Covid-19 pandemic:

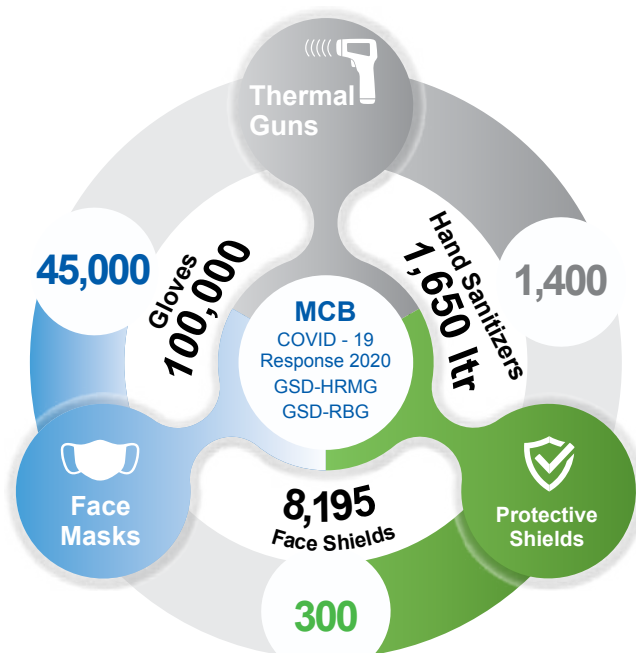

While addressing the unprecedented challenges posed by the pandemic, the bank maintained its usual support for staff with ongoing CSR measures including Umrah allowance, staff welfare fund, and allowances for marriages/funerals.

In the case of operations in Sri Lanka, the bank took all relevant health & safety measures to ensure the well-being of our staff, customers and all stakeholders. All branches were provided necessary safety equipment and materials to monitor and safeguard the working environment. Strict monitoring process was implemented and practiced across the Country Office and all branches in line with Health Ministry Guidelines to mitigate the risks. During the pandemic lockdown period, given the importance of essential banking services to our valued customers, selected MCB Bank branches remained open adhering to regulatory and local authority guidelines.

### Occupational Health and Safety

For any progressive and productive organization, sound health & safety alongside a congenial work environment serve as key elements to gauge organizational impact; MCB Bank takes pride in providing a productive environment to its employees.

Since there is a strong focus on the safety and wellbeing of Bank employees and its customers, all iconic buildings and branches of the Bank are equipped with modern fire safety, surveillance and security equipment (as applicable). Furthermore, trained security personnel ensure the physical safety and security of all employees, customers, buildings and equipment.

The Bank has developed a comprehensive “Health, Safety & Environment Policy” which is periodically reviewed and updated by the Bank Management and implemented across the board.

MCB Bank is cognizant of the fact that to achieve any objective, staff is the prime enabler. Therefore building administrators, floor coordinators and additional support staff in multistoried/multipurpose buildings ensure the provision of a safe, healthy and conducive work environment for Bank staff.

Additionally, staff evacuation drills are periodically conducted under the supervision of the security department which helps staff practice how to act and respond during different emergency situations. First aid kits are maintained at all major buildings and branches of the Bank.

The dangers of smoking are well-known. Among adults, second-hand smoke can cause serious ailments including



cardiovascular and respiratory diseases, coronary heart disease and lung cancer. Keeping in mind the dangers posed by smoking to both smokers and non-smokers alike, the senior management of MCB Bank has declared all Bank buildings No Smoking Zones. Staff members are allowed to smoke at a safe distance away from bank premises. For the safety of bank staff and their family, pictorial safety messages on topics such as Dengue prevention measures, safe driving/riding in the rain tips, precautionary measures in case of smog/fog, heat precautions, earthquake safety tips, fire safety actions, etc. are also frequently disseminated through the Bank's internal communications.

All permanent employees of the Bank are provided with medical coverage under a comprehensive staff group life and medical insurance policy. MCB Bank has always been keen in taking initiatives such as on-site health checkups, arranging seminars on health & safety and emergency preparedness within its staff to safeguard life and assets of the Bank.

### **Business Continuity Management**

Business Continuity Management (BCM) is a multifaceted process that identifies and recognizes risks, threats and vulnerabilities that potentially impact the Bank's operations both in internal and external contexts. BCM provides framework and creates ability for an organization to mitigate risk in a dynamic, ever-changing environment and still perform its critical processes and functions.

A robust Business Continuity Plan (BCP) outlines a range of disaster scenarios and the steps to be taken in order to minimize the potential harm to business during adverse situations. System recovery procedures are structurally planned for the future, therefore the Bank endeavors to sustain and deploy an effective enterprise-wide BCM program to provide seamless services and products for customers/stakeholders.

The Board of Directors periodically reviews and gauges our preparedness to deal with any untoward situation. The senior management of the Bank ensures an effective Business Continuity Policy & Framework exists. This ensures clear and concise plans are maintained for all critical areas to reduce the risk of downtime in any contingency scenario.

In these difficult times, when the global COVID-19 pandemic has impacted every segment of life, the Bank adopted a proactive approach and immediately arranged for Personal Protective Equipment's (PPEs) comprising of face masks, hand gloves, face shields, hand sanitizers etc. for its staff and visiting customers. Furthermore, special screening arrangements, maintenance of social distance, reducing the deployment of staff, periodic disinfection in branches and offices were key initiatives taken to ensure continuity of business and services, thus complying with Government and WHO precautionary instructions.

Furthermore, to nurture and enhance the confidence in Bank's system and processes, Business Continuity Plans are periodically reviewed and updated. Since BCM runs smoothly across the Bank's corporate structure and branch network, the confidence and expectations of millions of customers, stakeholders and regulator is upheld. The BCM is part of our commitment to ensuring continued functionality of critical businesses and functions under any circumstances.

### **Business Ethics and Anti-Corruption Measures**

The Bank actively identifies and addresses possible risk factors through the implementation of policies and procedures designed to reduce the possibility of such incidents. In this regard, it has fielded, alongside its Human Resource Policies and Procedures, a comprehensive "Code of Conduct and Business Ethics" which is disseminated to staff for information and sign off. This document is also readily available to all staff on Intranet Portal.

The Bank continues to maintain a strong compliance culture across the board. Employees are expected to perform all tasks with diligence and honesty at all times. The Code of Conduct of the Bank comprehensively defines the values and minimum standards for ethical business conduct.

Employees ensure that all interactions with clients, competitors, business partners, government and regulatory authorities, shareholders, or with one another, follow a vigorous ethical standard. The Bank's foremost effort is to ensure that the conduct of the employees is impeccable.

This is done with the help of guidelines that ensure compliance with all applicable laws and regulations. MCB Bank strives to ensure a friendly and harassment-free environment for all employees. The policy for protection of women harassment has been revisited and is circulated Bank-wide every year. Zero tolerance for any form of harassment or discrimination is further covered in the Bank's existing Code of Conduct.

The Disciplinary Action Committee (DAC) takes vigorous action to address any violation of policies, procedures, acts of fraud and forgery, breach of discipline and code of conduct, ethics and business practices, law of land and statutory regulations by an employee.

To maintain a harmonious and efficient work environment in which the employees are assured a non-discriminatory, transparent, harassment free and respectful atmosphere regardless of their caste, religion and gender, HRMG has issued a clear and non-discriminatory Code of Conduct, violation of which may lead to disciplinary action.

### **Service Council**

Service Council is a monthly forum, chaired by the President, which brings together key stakeholders from across the bank with a view to place service on the forefront through thought leadership, collaborative discussions and creation of a clear service roadmap.

### **Customer Experience Management**

Feedback is solicited from customers for all contact points via surveys and remedial actions are taken for identified areas. The end goal of these measures is to be the most preferred bank in Pakistan.

### **Turnaround Time (TAT) Monitoring**

Monitoring and evaluation of service indicators is part of the belief in increasing and retaining one's customer base. In order to maintain a strong hold on processes within the Bank, the Service Quality Division has devised several controllable measures at par with prevailing market practices. Against each measure, a tolerance level along with a timeline is set. Similar to Branch Banking, indicators for Consumer Assets, Credit Cards, Bancassurance, Call Centre, Mobile Banking Internet Banking and ATM Uptime are monitored on a monthly basis.

### **Quality Checks and Mystery Shopping:**

During 2020, 99% of total branches were monitored with respect to service parameters and protocols. The remaining branches were not visited owing to security concerns/remote locations and few were under renovation. Moreover, 929 branches were 'Mystery Shopped' by independent external agencies and results of this activity were shared with management for further improvement.

### **Consumer Protection Measures**

The Bank is committed to providing quality products and services to its customers. It maintains a privacy statement for the usage of its products i.e. Credit Cards, ATM PINs etc.

To ensure a culture of 'Quality Customer Service' the Bank has a dedicated Service Quality Division with the objective of strengthening the Bank's service culture. Regular training sessions are conducted in all Circles, Call Centers and other front-end staff offices regarding 'Service Excellence' and 'Customer Satisfaction'.

## **Customer Grievance Handling**

Bank considers complaints as opportunities for improvement and understands the link between complaint resolution and customer loyalty. We believe that complaints are a primary measure of customer dissatisfaction; thus, they should be taken seriously and staff should be encouraged to bring complaints to the forefront so that gaps can be identified and fixed.

Service Quality (SQ) function is the custodian of customers' grievance handling and works in collaboration with all businesses / functions of the bank responsible for acknowledging, investigating, tracking, escalating and resolving customer complaints within specified turnaround times. A centralized complaint resolution team manages all customer complaints through a Complaint Management System. Currently, all our customer touch points have access to this system so as to ensure that all complaints, whether verbal or written, are immediately captured in the system.

Following are the channels through which complaints are received:

- MCB Call Center
- MCB Branches
- MCB E-mail

- Social Media
- Letter/Fax
- Customer Service Centers
- Banking Mohtasib Secretariat
- State Bank of Pakistan
- Management Committee (MANCOM)

The Bank makes its best effort to ensure that resolution of complaints is comprehensive, appropriate and quick. The customer is kept informed on the status of their complaint, starting from complaint acknowledgement till its resolution. The escalation matrix for complaint resolution observed and designed in the system is such that a complaint, if not resolved within the specified turnaround time, gets escalated to the next senior level of management and keeps on escalating further till resolved.

SQ also performs in-depth qualitative and quantitative complaints analysis followed by suggestions and recommendations in order to eliminate root causes of customer issues and drive continuous improvement.

During 2020, a total of 152,234 complaints were logged in the system out of which 150,788 complaints were resolved during the year (resolution rate 99.05%).

There was a 35% increase in total logged complaints in 2020 as compared to the previous year. Total complaints logged during 2019 were 112,359.

| Statement of Complaints           | Numbers | Percentage     |
|-----------------------------------|---------|----------------|
| <b>Total Complaints Received</b>  | 152,234 | –              |
| Closed                            | 150,788 | 99.05%         |
| Open                              | 1446    | 0.95%          |
| Average time taken for resolution |         | 8 Working Days |

| Total Login Details:      | Total   | Contribution |
|---------------------------|---------|--------------|
| Complaints                | 152,234 | 88%          |
| Request/Queries/Reversals | 20,320  | 12%          |
| Total                     | 172,554 | 100%         |

## Investing in communities

MCB Bank is committed to creating sustainable economic and social development for our stakeholders.

Following areas were addressed by the Bank in 2020:

- Outreach to the healthcare sector
- Education
- Sports
- Contribution to the public good
- Equal opportunity for all employees
- Energy conservation
- Environmental protection
- Women empowerment
- Green banking activities and initiatives

### Outreach to the Healthcare Sector

The Bank seeks to support key initiatives that bolster the healthcare sector of Pakistan.

During 2020, the coronavirus pandemic was a key area for focus. To help ensure the health and safety of those fighting at the frontline of the crisis, the Bank donated Personal Protective Equipment (PPE) such as masks, protective clothing and goggles for personnel of Health Department- Government of Punjab and Makran Division.

MCB Bank deepened its commitment to major health initiatives throughout the year. Comprehensive marketing collateral was also deployed to raise awareness of breast cancer in collaboration with Pink Ribbon. The awareness campaign also supported Pink Ribbon in the NGO's efforts to raise funds for Pakistan's first ever Breast Cancer Hospital. The Bank also supported the construction of hospital and completion of pathology lab at Saleem Memorial Trust Hospital.

The Bank also helped generate awareness for organizations like Saylani Welfare Trust, Sindh Institute of Urology and Transplantation (SIUT), Edhi Welfare Organization and Shaukat Khanum Memorial Cancer Hospital with its internal and external communication platforms.

As part of its effort, the Bank helped to promote donations through platforms such as MCB Mobile Banking and MCB Internet Banking. MCB Bank also supported:

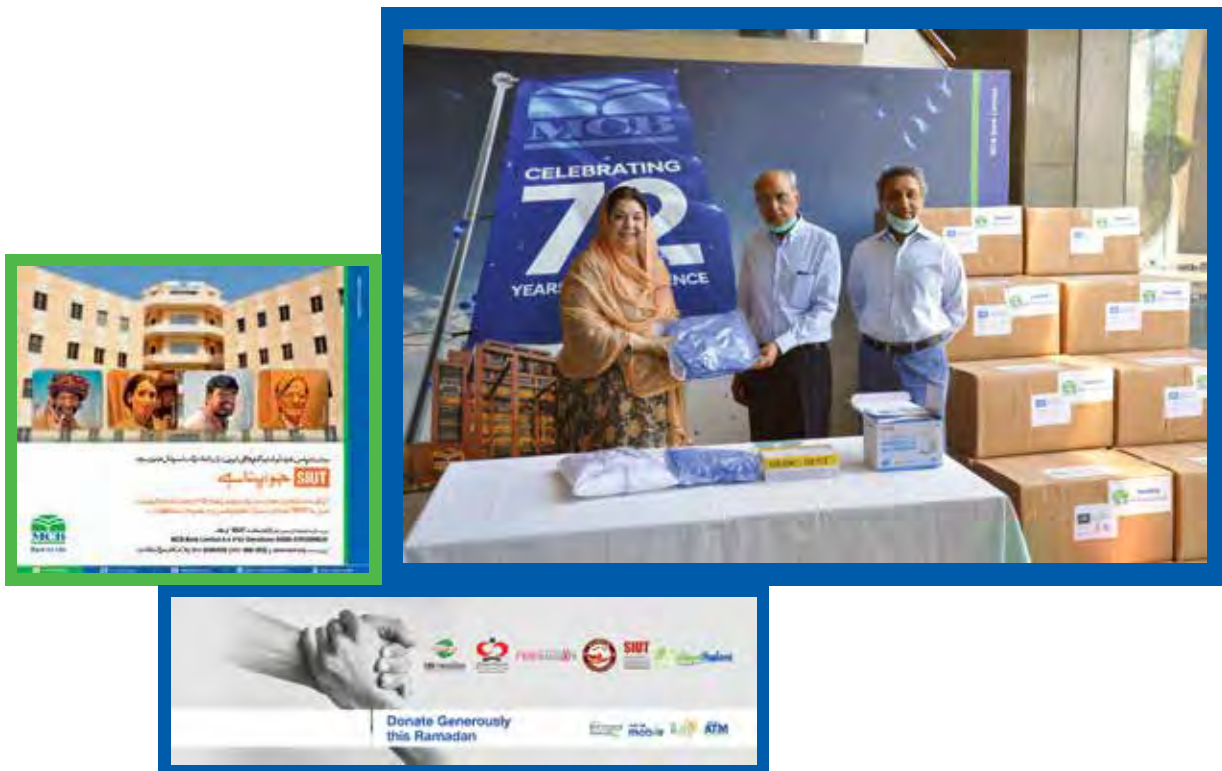

### Education

Given the importance of the educational sector, MCB Bank fully supports its uplift. Furthermore, the Thardeep Rural Development Programme (TRDP) was provided support with the purchase of books and furniture for a public library established in the rural area of Mithi, Sindh. The initiative focuses on raising the literacy level in this location. MCB Bank also contributed to the 1st Convocation held by Indus Medical College.

### Sports

The Bank recognizes the important role played by sports in the well-being and health of the Nation. In this regard, it focused on supporting the POF All Pakistan Floodlit Football Tournament and International Men's & Women's Squash Tournament.

### Contribution to the Public Good

MCB Bank will always support any endeavor that promotes the greater good. This was done through different initiatives throughout the year. The aim of these projects was to have a positive social impact on the many communities the Bank works with in different capacities.

As part of its civic responsibility to support communities affected by the COVID-19 pandemic, the Bank provided critical support by donation of ration packs to needy families in Lahore in collaboration with the Jahandad Society for Community

Development. In battling the scourge of corruption, the Bank was poised to support the efforts of the government by sponsoring branding material for the Anti-Corruption Day Event.

Measures were taken to minimize the impact of COVID-19 and maximize output during the crisis for the Bank's customers. In line with SBP directives, the Bank provided financial relief with restructuring/rescheduling for 1,800+ accounts. In the case of credit cards, in addition to restructuring credit card dues in some cases, the Bank offered low markup installment and deferment plans to assist customers.

The Bank also contributed to society during these trying times in consultation with its insurance providers by providing complimentary benefit of PKR 150,000 to our conventional and Takaful policy holders in addition to the existing policy benefits and provided relaxation in premium / contribution payments to all its policy and certificate holders till June 2020.

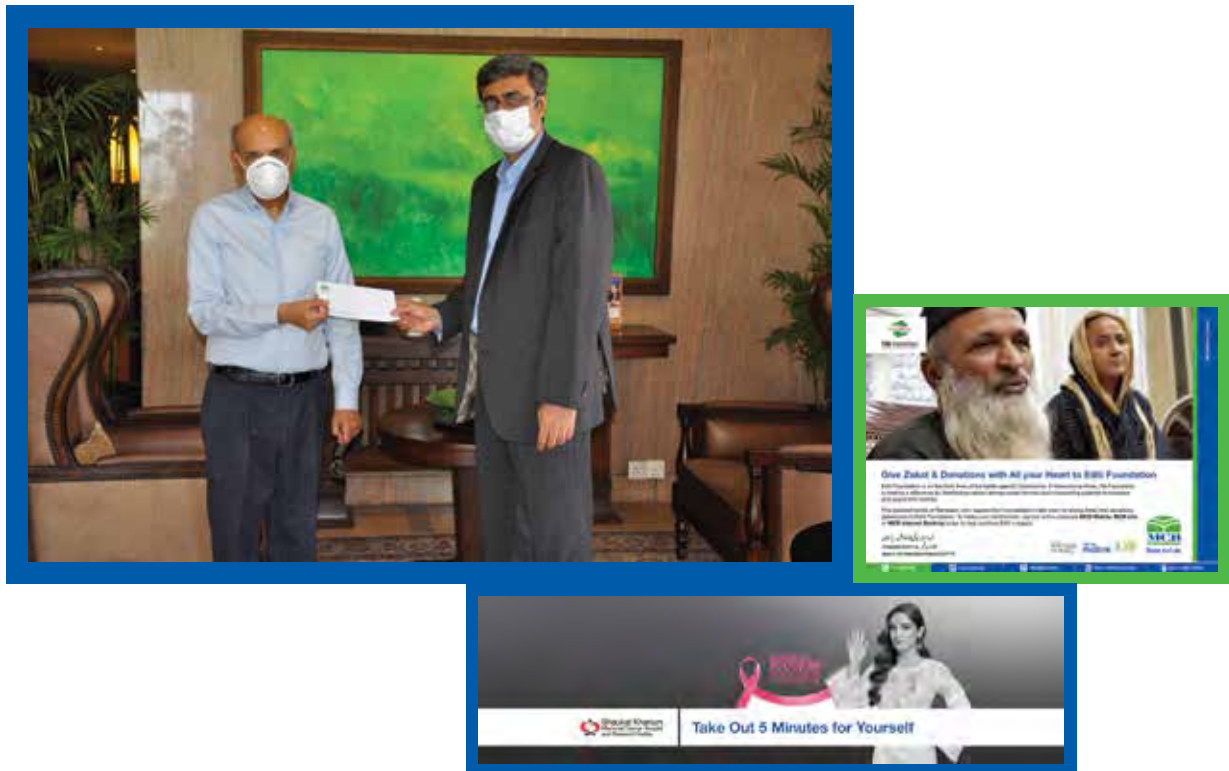

### Equal Opportunity for All Employees

The Bank prides itself on providing equal employment opportunities, free of discrimination, and implemented on a methodical merit based non-discriminatory selection process. The Bank capped off the year 2020 with permanent staff strength of 13,272 employees and 103 contractual employees. The ratio of female staff members stood at 16.3% compared to 15.8% from the previous year.

### Energy Conservation

MCB Bank policies are geared towards reducing our environmental footprint and promoting the use of energy smartly and economically to cut down on operational expenses. This policy is enforced countrywide to conserve energy, by exercising strict control over electricity lights discipline whether in the Bank Branches or Principal offices.

Recent WWF certification of Green Banking to MCB Centre building is a great achievement in-line with energy conservation by implementing policies which encompass solar energy, LED Lights, paperless work and water conservation. WWF-Green Office is a practical environmental program designed for office/workplaces, which helps to reduce the carbon footprint, achieve resource conservation and contribute towards slowing down climate change. Under the guidelines of WWF-Green Office, training programs were run by WWF –Green Office Team at MCB Centre which followed by audit for “logo” and “diploma” and WWF Certification is awarded to MCB Centre for fulfilling their minimum Green Office criteria. The Bank also engages employees through its internal communication forum to follow the best practices and initiatives to inculcate consciousness to save energy.

### **Energy Saving Measures**

MCB Bank is already following the policy to exercise strict controls over excessive lighting and restricting switching-on of lights to required areas only as well as switching-off all lighting immediately on office closure timing except those for building security requirement.

Almost all the bank buildings have been switched over to the LED Lights instead of conventional bulbs/tube lights. Post office/late hour sitting is discouraged to exercise saving of energy. To exercise maximum control over building energy resources, a Building Management System (BMS) is installed at MCB Bank Principal buildings (MCB House Lahore, MCB Center Lahore and MCB Tower Karachi). The facility enables centralized control from a single point/place.

The first of its class waste heat from cogeneration plant is installed at one of MCB Bank's principal buildings i.e. MCB Centre, Lahore. A waste heat of gas engine (1555 KW) is also installed at MCB Principal building, MCB Tower Karachi, to produce hot water to be used in chiller with boiler. Almost 100 to 150 tons of extra cooling is generated through this process.

### **Environmental Cleanliness & Protective Measures**

MCB Bank is working on Environmental Protection as a top strategic priority. The Bank believes in a safe environment for the welfare of the staff.

MCB Bank is moving towards paperless banking and resource efficiency in our operations. Some of our notable initiatives include reduction of environmental footprint in transportation and mobility of staff, energy efficiency and greening of office premises and self-segregation of waste into dry and wet waste streams at source. We ensure that all our dry waste including paper and plastic streams are reused in our corporate offices and bank branches through ethical recycling measures.

We ensure that our wet waste including kitchen and organic materials are responsibly disposed at landfills with minimum impact to the environment. For this purpose, we use technology to monitor and track our sustainability drive to achieve zero waste objectives. Partnership building is essential for environmental sustainability, therefore we are keen to cultivate impactful collaboration with civil society organizations such as AMAL which facilitates the Green Office Program to achieve net zero objectives for the second consecutive year. With this collaboration, we intend to set new trends for sustainable banking in Pakistan.

The COVID-19 pandemic did not hold back efforts towards greater sustainability. Some of our efforts resulted in following impacts:

1. Collection of dry waste for ethical recycling = 9.2 tons
2. Reduction in CO2 emissions = 450 tons

MCB Bank has taken these initiatives not only to meet legal requirements but as its corporate responsibility to address environmental concerns of our clients and stakeholders. We are proud to remain ahead of our competitors as one of the first banks in Pakistan to adopt Green Banking Guidelines of the State Bank in letter and spirit. The MCB Bank management appreciates the cooperation it received from its employees and staff and the interest shown by stakeholders in adopting responsible and ethical business practices.

High quality janitorial services in the cities are provided for three principal buildings (MCB House Lahore, MCB Centre Lahore and MCB Tower Karachi). For each building, administrators and building floor coordinators conduct periodical checks to maintain the highest cleanliness standards.

### **Green Banking Activities and Initiatives**

Activities and initiatives taken by the Bank under SBP IH&SMEFD Circular # 08 dated October 09, 2017 are discussed in Green Banking Initiative section.

## Certifications Acquired and International Standards Adopted

### World Wide Fund for Nature (WWF) - Green Office Certification

MCB has successfully attained 'Green Office Certification' from WWF for one of its iconic buildings; MCB Centre, Lahore. This certification represents a landmark achievement in MCB's pursuit of reducing the ecological footprint at its workplace and has consequently placed the Bank in an exclusive club of domestic Banks that have met the requirements of this rigorous assessment and certification program.

### International Standards of Sustainability adopted as per UN SDGs and UN Global Compact

|                                                                                     | UN SDG Indicator                           | UN Global Impact                                                                                                  | MCB Banks' Alignment                                                                                                                                                                                                                                                                                                                                                                                                                                                                                                                                                                                                                                                                                                                                                                                                                                                               |
|-------------------------------------------------------------------------------------|--------------------------------------------|-------------------------------------------------------------------------------------------------------------------|------------------------------------------------------------------------------------------------------------------------------------------------------------------------------------------------------------------------------------------------------------------------------------------------------------------------------------------------------------------------------------------------------------------------------------------------------------------------------------------------------------------------------------------------------------------------------------------------------------------------------------------------------------------------------------------------------------------------------------------------------------------------------------------------------------------------------------------------------------------------------------|
|    | 3: Good Health and Well Being              |                                                                                                                   | In addition to supporting employees' health and wellbeing, the Bank also actively engages in community services within the health sector under its CSR Plan.<br><br>The detailed initiatives have been disclosed in the Sustainability & Corporate Social Responsibility section of the Annual Report.                                                                                                                                                                                                                                                                                                                                                                                                                                                                                                                                                                             |
|    | 5: Gender Equality                         | 6: Elimination of discrimination with respect to employment.                                                      | The Bank prides itself on providing equal employment opportunities that are free of discrimination and are being implemented on a methodical and merit based selection process: <ul style="list-style-type: none"> <li>There has been a consistent growth in the number of female staff at the Bank (15.8% in 2019 to 16.3% in 2020).</li> <li>The representation of women in the senior management positions stood at 16%; with 20 female staff members reporting directly to the Head of Departments (HOD's) who in turn report to the CEO.</li> </ul> The Bank's product portfolio has been deployed to foster the captioned goal by actively promoting the MCB Ladies Account portfolio, wherein a total of 2,520 Accounts were successfully added to the portfolio during 2020.                                                                                               |
|  | 7: Affordable and Clean Energy             | 8: Initiatives to promote greater environmental responsibility<br><br>9: Fostering environment friendly practices | <ul style="list-style-type: none"> <li>Bank has converted 10 branches to solar power operations.</li> <li>Buildings have been switched over to energy efficient LED Lights instead of conventional bulbs/tube lights.</li> <li>A Building Management System (BMS) has been installed at the principal buildings to enable centralized control over management of energy resources.</li> <li>Contributing to the Central Bank's cause for inculcating environmental considerations in banking products, the Bank has extended financing facilities to customers against renewable energy products; the total outstanding balance as at December 31, 2020 stood at Rs. 75 million.</li> </ul>                                                                                                                                                                                        |
|  | 8: Decent Work and Economic Growth         | 3: Upholding freedom of association<br><br>10: Working against corruption.                                        | Despite constraints created by the COVID-19 outbreak, the Bank continued to effectively play its role as a key service provider and intermediary in the financial market; hence, making a significant contribution to the country's economic growth: <ul style="list-style-type: none"> <li>Created employment opportunities which led to the hiring of 1,638 employees.</li> <li>Contributed Rs. 16.08 billion to the national exchequer on account of income taxes to the Government Treasury.</li> <li>Extended finance to all key economic segments including the SME and Agriculture sector which cumulatively contribute above 40% to the domestic GDP.</li> <li>Played a central role in supporting Governments' and Central Banks key pandemic responses for credit extension and un-interrupted provision of essential banking services to the general public.</li> </ul> |
|  | 9: Industry Innovation and Infrastructure  |                                                                                                                   | The Bank continues to actively contribute to the Central Banks cause of improving financial inclusion in the country by extending branch outreach and customer digital touchpoints.                                                                                                                                                                                                                                                                                                                                                                                                                                                                                                                                                                                                                                                                                                |
|  | 12: Responsible Consumption and Production |                                                                                                                   | MCB's Green Banking Policy lays the foundation for safeguarding the Bank against environmental vulnerabilities and playing its due role in transforming the country towards a low carbon and climate resilient economy.<br><br>The detailed policy has been disclosed in the Green Banking section of the Annual Report.                                                                                                                                                                                                                                                                                                                                                                                                                                                                                                                                                           |

# Green Banking

"Green Banking" is a term that refers to promotion of environmentally friendly practices that aid Banks and their clients in identifying and managing environmental risks as well as reducing their carbon footprint and related socially adverse actions.

MCB Bank undertakes its responsibility to be recognized as an organization that is aware of its environmental obligations. MCB Green Banking Office (GBO) was established in 2018 which is effectively implementing and monitoring the Green Banking Guidelines issued by State Bank of Pakistan. MCB GBO aims to make Banks processes, use of IT and physical infrastructure more sustainable and efficient to have minimal impact on the environment.

The Bank is continuously striving to inculcate the environmental consciousness among stakeholders, transforming operational processes to safeguard against environmental vulnerabilities, and play its due role in conversion of country's economy into a low carbon and climate resilient economy.

## Few Green initiatives undertaken by MCB Bank are as mentioned below:

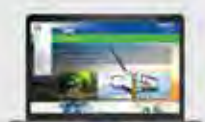

### Green Banking Web-Page

A dedicated web-page has been developed on the MCB Bank Corporate website for external stakeholders' awareness regarding MCB's initiatives on Green Banking segment.

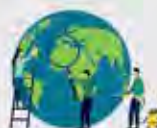

### Environmental Risk Management System

Environmental Risk Assessment of customers who approach the Bank for a credit facility is now part of the credit approval process, and this assessment is carried out on an ongoing basis at the time of annual renewal of a customer's credit package.

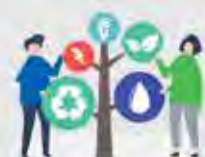

### Green Products/Services

MCB Bank endeavors to integrate sustainability into products and services provided by the Bank. Such products involve environment-friendly features including renewable energy, modern drip/sprinkler irrigation techniques etc. All MCB Fun Club account holders have the option of planting a tree in their name and watch it grow on Google Earth. In addition, clients are provided with advisory services on availing green finance for environmentally friendly/renewable energy projects.

An array of Green initiatives has been augmented into the Digital Banking services which help to reduce dependence on paper. These services include eco-friendly digital initiatives like Internet Banking, Mobile Banking, SMSs etc. Recently, MCB Bank has introduced the Roshan Digital Account (RDA), a digital solution for on-boarding Non-Resident Pakistanis (NRPs). The Bank is offering e-Statement and E-Alerts, and the Direct Fund Transfer facility has also been enabled for Credit Card customers.

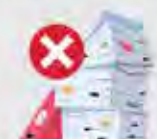

### Paperless Operations

MCB Bank is opting for ways and mechanisms to reduce the consumption of paper and other associated resources through automation of paper-based workflows and processes. Few initiatives undertaken for reducing paper consumption include but are not limited to suspension of paper-based internal circulars dissemination, introduction of web-based dispute claim filing utility for all Alternate Delivery Channels and deployment of application-based workflows system for gradual migration towards paperless environment. Furthermore, the Bank is also implementing a value-added feature to its ATMs which will provide an option to the customers for making financial transactions without printing receipts.

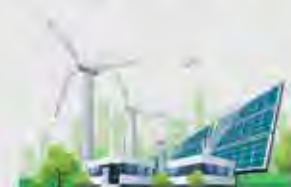

### Renewable Energy Initiative

MCB Bank has installed solar power systems in some Branches and ATMs to avoid Greenhouse Gas (GHG) emissions. These solar installations augmented clean energy in energy mix and ultimately avoided approximately 13 tons of carbon dioxide (CO<sub>2</sub>) emissions as of December, 2020 to the environment.

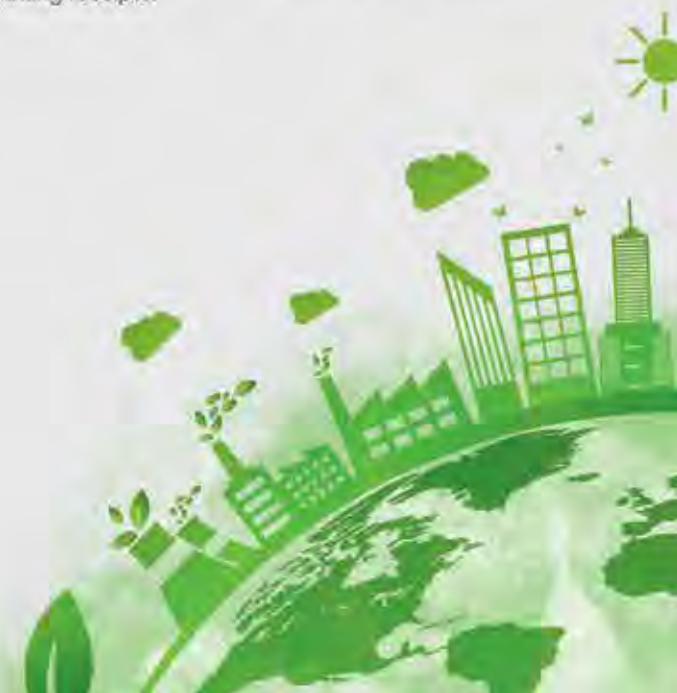



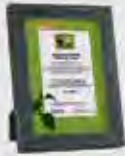

### World Wide Fund for Nature (WWF) - Green Office Certification

MCB Bank has successfully obtained WWF - Green Office Certification for one of its iconic buildings - MCB Centre, Lahore. This is a landmark achievement and makes MCB Bank one of the few Banks who have successfully met the requirements of this rigorous assessment and certification program.

A WWF certified Green Office is a workplace that reduces its burden on the environment, achieves savings and slows down climate change by reducing its carbon dioxide (CO<sub>2</sub>) emissions. A building-specific Environmental Management Plan (EMP) had been implemented to achieve the Green Office Certification.

The implementation of EMP helps to cut down on energy/electricity, fuel, paper and recycling of dry waste generated from the building. The engineering and administrative controls enabled to reduce approximately 90 tons of CO<sub>2</sub> emissions during 2020 as compared to the previous year.

As part of the certification process, WWF undertook a detailed certification audit to check the resource conservation measures implemented in the building. MCB Bank satisfactorily met all the set requirements for MCB Center to be declared as Green Office.

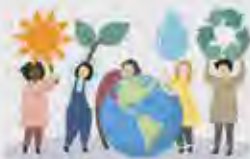

### Green Awareness Campaign

A Green Awareness Campaign regarding environment-related annual days such as World Water Day, Mother Earth Day and World Environment Day has been commemorated to alert employees and customers about the significance of the environment. The commemoration includes different dissemination mediums such as artwork-based emails, standees displayed at different buildings of the Bank and web-banners displayed on MCB Bank's corporate website. Furthermore, employee's perception has been developed on "Own Impact Reduction Measures" through electronic dissemination of specially designed artworks regarding usage of electricity, water, paper, fuel etc. at a regular frequency to instill the practice of resource conservation in their daily lives.

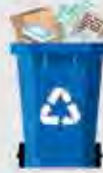

### Dry Waste Management

MCB Bank has partnered with a civil service organization which provides services of waste collection and recycling through its green partner network. As a pilot project, the dry waste generated from two iconic buildings in Lahore which weighs approximately 8.3 tons is collected and recycled in an environment-friendly manner. The waste is being reused as raw material for other industries which ultimately reduces the burden on landfill sites and the environment.

Green points were allocated against each KG of recycled waste, which were redeemed by procuring environmentally-friendly products. The allocated green point for each product includes a significant social contribution for training and empowering of youth and women.

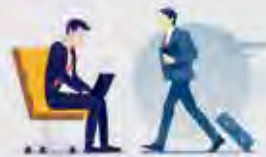

### Reduction of Business Travel

MCB Bank has significantly reduced business-related travel, especially during the COVID-19 situation, moving towards effective use of video conferencing/telepresence technology. These virtual meetings save time, money and other associated resources, resulting in lesser carbon footprint as compared to travel-based meetings.

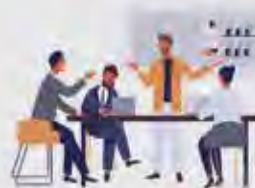

### Employees Capacity Building

COVID-19 pandemic has provided us with an opportunity to innovate and adopt sustainable means to learn and impart knowledge to employees by keeping them abreast of COVID-19 advisories/circulars digitally during lockdown situations. The Green Banking and other trainings are provided through e-learning portal which conserves substantial resources including paper, printing, electricity, fuel etc. and ultimately reduces carbon footprint to environment as compared to room-based trainings.

Green Banking trainings have become the major driver to sensitize the staff regarding environmental implications and adoption of the Green culture across the Bank. 2,189 personnel have successfully received training on Green Banking during 2020.

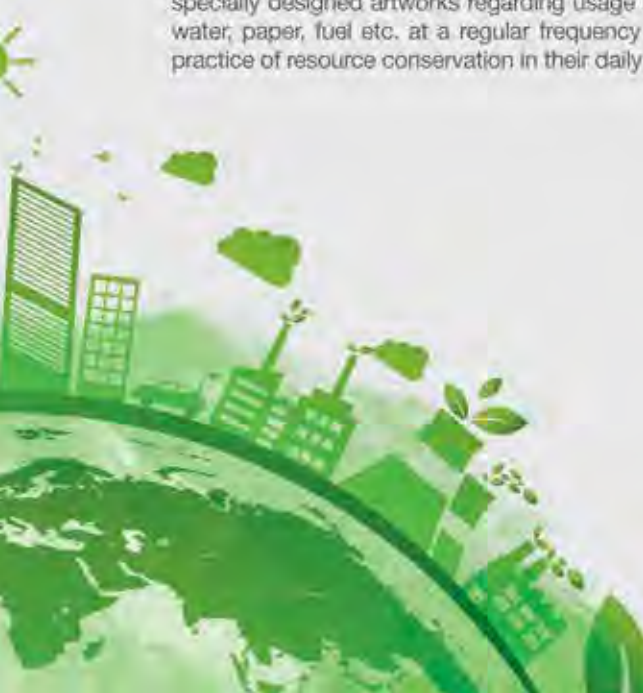

# Stakeholder Relationship & Engagement

The development of sustained stakeholder relationships is paramount to the performance of any institution. From short term assessments to long-term strategic relationship building, ‘Stakeholders’ Engagement’ lies at the core of our business practices to promote improved risk management, compliance with regulatory and lender requirements in addition to overall growth of the Bank.

In achieving and entrenching its integrated approach to sustainability, MCB Bank takes a highly collaborative approach towards ensuring maximum interaction with, and input by all its stakeholders.

At MCB, stakeholder engagement involves far more than merely communicating with its various stakeholder groups. The Bank regards its stakeholders as partners and makes every effort to use all possible mediums to ensure that they are abreast with disclosures, aware of forums to provide valuable input and feedback that can help the Bank to grow, strengthen relations and meet expectations to serve better.

## Stakeholder Engagement Process and Frequency

The following tables provide an overview of stakeholder engagements at MCB Bank

| Stakeholders                                      | Stakeholder worthiness and reasons of engagement                                                                                                                                                                                                                                                                                                                                                                                                                                                                                                                                                                     | Engagement frequency                                                     | Mode of consultation / interaction                                                                                                                                                                                                                                                                                                                                                                                                                                                                                                                                                                             |
|---------------------------------------------------|----------------------------------------------------------------------------------------------------------------------------------------------------------------------------------------------------------------------------------------------------------------------------------------------------------------------------------------------------------------------------------------------------------------------------------------------------------------------------------------------------------------------------------------------------------------------------------------------------------------------|--------------------------------------------------------------------------|----------------------------------------------------------------------------------------------------------------------------------------------------------------------------------------------------------------------------------------------------------------------------------------------------------------------------------------------------------------------------------------------------------------------------------------------------------------------------------------------------------------------------------------------------------------------------------------------------------------|
| Institutional Investors / Shareholders / Analysts | <ul style="list-style-type: none"> <li>To deliver relevant and timeous information to existing and potential shareholders</li> <li>To keep shareholders posted to ensure that our shares are traded at a fair value</li> <li>To ensure that the image of the bank and the trust placed in by our valuable shareholders, continues to improve, thereby minimizing the potential for reputational risks</li> </ul>                                                                                                                                                                                                     | <p>Quarterly, semi-annually and annually</p> <p>When the need arises</p> | <ul style="list-style-type: none"> <li>Quarter, semi-annual and annual financial statements</li> <li>Annual General Meeting</li> <li>Participation in local and international road shows</li> <li>Press releases / Media announcements</li> <li>Communications and answering investor / analyst questions</li> </ul>                                                                                                                                                                                                                                                                                           |
| Employees                                         | <ul style="list-style-type: none"> <li>Integral to deliver strategic objectives</li> <li>Our most important and valued ambassador</li> <li>To ensure that we remain an employer of choice by providing a safe, positive and inspiring working environment</li> <li>To understand and respond the needs and concerns of our staff members</li> <li>To educate our staff regarding strategic direction and to communicate the pertinent information relating to bank activities</li> <li>Continuously encouraging employees and working towards creating a healthy, ethical and supportive work environment</li> </ul> | <p>Annual</p> <p>When the need arises</p>                                | <p>Investing in a wide range of training programs for every member of the human capital to ensure personal and professional development.</p> <p>In addition to the regular communication that takes place with direct managers and teams through a range of interactive channels, specific employees engagement include:</p> <ul style="list-style-type: none"> <li>Regular electronic and printed newsletters</li> <li>Compliance letters</li> <li>Annual conference</li> <li>Strategy sessions</li> <li>Grievance reporting procedure</li> <li>One Bank, One Team sessions with senior management</li> </ul> |

| Stakeholders                | Stakeholder worthiness and reasons of engagement                                                                                                                                                                                                                                                                                                                                                                                                               | Engagement frequency                                                                                              | Mode of consultation / interaction                                                                                                                                                                                                                                                                                                                                                                                             |
|-----------------------------|----------------------------------------------------------------------------------------------------------------------------------------------------------------------------------------------------------------------------------------------------------------------------------------------------------------------------------------------------------------------------------------------------------------------------------------------------------------|-------------------------------------------------------------------------------------------------------------------|--------------------------------------------------------------------------------------------------------------------------------------------------------------------------------------------------------------------------------------------------------------------------------------------------------------------------------------------------------------------------------------------------------------------------------|
| Customers                   | <ul style="list-style-type: none"> <li>• To win and maintain customers by developing and providing products and services to improve the brand.</li> <li>• To understand the growing financial services needs of our customers.</li> <li>• To provide better solution and advice to our customers' financial requirements</li> <li>• To ensure accuracy of our customers respective information.</li> <li>• Integral to achieve strategic objectives</li> </ul> | <p>Regular interaction of customers through branch staff</p> <p>Dependent on customers' specific requirements</p> | <ul style="list-style-type: none"> <li>• Spreading the geographical boundaries through opening more branches across the country.</li> <li>• Continuously innovating in product suite and operational process to meet customer requirements in the most efficient manner.</li> <li>• Interaction through our branches, relationship managers, call centers, social media, surveys and various advertising activities</li> </ul> |
| Suppliers/Service Providers | <ul style="list-style-type: none"> <li>• Adhere to proper procurement regulations while maintaining a good business relationships with the service providers</li> </ul>                                                                                                                                                                                                                                                                                        | <p>Routine basis/ When the need arises</p>                                                                        | <ul style="list-style-type: none"> <li>• Rigorously following internal procurement policy and upgrading the policy regularly to ensure strong control and fair treatment of suppliers.</li> </ul>                                                                                                                                                                                                                              |
| Regulator                   | <ul style="list-style-type: none"> <li>• To maintain open, honest and transparent relationships with regulator</li> <li>• To ensure meticulous compliance with legal and regulatory requirements</li> <li>• Develop legislation and policies that impact the environment in which we operate</li> </ul>                                                                                                                                                        | <p>Daily, weekly, quarterly</p> <p>When the need arises</p>                                                       | <ul style="list-style-type: none"> <li>• Active engagement with regulator improves level of compliance these engagements include meetings with representative of regulator and written communications on need basis</li> <li>• One-on-one Meetings</li> <li>• Submission of applicable statutory returns<br/>Responding / enquiring various queries / information</li> </ul>                                                   |

| Stakeholders | Stakeholder worthiness and reasons of engagement                                                                                                                                                                                                                                                                                                                                     | Engagement frequency                              | Mode of consultation / interaction                                                                                                                                                                                                                                                                                                                                                                                                                                                                                                                                                                                  |
|--------------|--------------------------------------------------------------------------------------------------------------------------------------------------------------------------------------------------------------------------------------------------------------------------------------------------------------------------------------------------------------------------------------|---------------------------------------------------|---------------------------------------------------------------------------------------------------------------------------------------------------------------------------------------------------------------------------------------------------------------------------------------------------------------------------------------------------------------------------------------------------------------------------------------------------------------------------------------------------------------------------------------------------------------------------------------------------------------------|
| Communities  | <ul style="list-style-type: none"> <li>To have best collaboration with our community for delivering our social responsibilities</li> <li>To obtain input from communities regarding key focus areas</li> <li>To create awareness of our integrated sustainability commitments and initiatives</li> <li>Conducting business without causing disruptions in the society</li> </ul>     | When the need arises                              | <p>The Bank actively participates in various social work initiatives as part of its corporate social responsibility. Being a conscientious member of the corporate community, the bank contributes to various social and charitable causes including towards health, education and social sectors.</p> <p>The bank is consistent in support for community development projects and interaction with a wide range of non-profit organizations.</p> <p>Enhancing financial access to marginalized population and most importantly, adding value to the society by being a good and transparent corporate citizen.</p> |
| Government   | <ul style="list-style-type: none"> <li>To build strong and constructive relationship with government, both as a partner in the development of our country and as a current / potential client</li> <li>To contribute in legislative development for evolution in our activities and operations</li> <li>To endorse our commitments for public sector business development</li> </ul> | When the need arises or on request by either side | <ul style="list-style-type: none"> <li>Understanding and ensuring all legal and regulatory requirements are complied with</li> <li>Engaging with the government to address matters impacting business</li> </ul>                                                                                                                                                                                                                                                                                                                                                                                                    |
| Media        | <ul style="list-style-type: none"> <li>To acknowledge the role of media as a channel to communicate with relevant stakeholders and public at large</li> </ul>                                                                                                                                                                                                                        | When the need arises                              | <ul style="list-style-type: none"> <li>Advertisements through print, electronic, social media, website, interviews and capacity building seminars</li> </ul>                                                                                                                                                                                                                                                                                                                                                                                                                                                        |

## Investor Relation Section on Corporate Website

The management of the Bank provides equal and fair treatment to all investors/shareholders through transparent investor relations, increased awareness, effective communication, and prompt resolution of investors' / shareholders' complaints.

The Bank disseminates information to its investors and shareholders through a mix of information exchange platforms, including its corporate website, maintained in both English and Urdu Languages under the applicable regulatory framework. The website is updated regularly to provide detailed and latest Bank information including but not limited to financial highlights, investor information, dividend and other requisite information besides the link to SECP's investor education portal, the 'Jamapunji'. The "Investor Relations" section is also maintained on MCB website [www.mcb.com.pk](http://www.mcb.com.pk) to promote investor relations and facilitate access to the Bank for grievance / other query registration.

## Steps to Encourage Minority Shareholders Participation in AGM

Apart from being an event for decision making on important matters, General Meeting also provides a forum for two-way engagement with the shareholders, particularly the minority shareholders. Therefore, the Bank takes the following measures to ensure meaningful participation of minority shareholders in General meetings:

- Notice of General meetings is sent to every member of the Bank at least 21 days before the meeting. The notice is also published in newspapers (both English & Urdu) having nationwide circulation. Moreover, the notice is also circulated from the forum of Pakistan Stock Exchange.
- The Bank timely updates its website with respect to all notices of general meetings.
- Annual Report of the Bank is sent to each member of the Bank before Annual General Meeting (AGM)
- All members are entitled to appoint proxy to attend, speak and vote at the meeting on his/her behalf.
- Members can attend and participate in the AGM through video-link.
- During AGM, a detailed briefing on the Bank's performance and future plans is given to the shareholders in both Urdu and English
- The shareholders are encouraged to raise queries and give suggestions relating to the Bank's operations.

## Stakeholder Engagement Policy & Summary of the Analyst Briefings

The Bank believes in frequent and transparent interaction with the stakeholder to share financial performance, future outlook, regulatory and economic environment. Such interactions facilitate in building the stakeholder's confidence in the institution.

Analyst briefings are interactive sessions between the management of the Bank and the investor community whereby the Bank takes the opportunity to apprise the local and foreign investors about the business environment and economic indicators of the country, explain Bank's financial performance, competitive environment investment decisions, challenges faced as well as business outlook.

The idea behind the Bank's investor engagement through these briefings is to give the right perspective of the business affairs of the Bank to the investors (both existing and potential) which help them in making their investment decisions.

The Bank conducts quarterly analyst briefings in order to share details pertaining to results announced and to respond to any queries of analysts relating to results and future prospects.

Other than the quarterly analysts briefing, business analysts are provided with information and briefings as and when they require without compromising the confidentiality. Face to face discussions have also been arranged with foreign analysts as and when required. The briefing further envisages our transparent and continuously evolving stakeholders' engagement approach.

Briefing is being held as teleconferencing and during the year four analysts briefing were held on following dates;

| <b>Results</b>                       | <b>Date</b>       |
|--------------------------------------|-------------------|
| Annual Results 2019                  | February 17, 2020 |
| 1 <sup>st</sup> Quarter Results 2020 | May 4, 2020       |
| 2 <sup>nd</sup> Quarter Results 2020 | August 25, 2020   |
| 3 <sup>rd</sup> Quarter Results 2020 | November 11, 2020 |

In addition to the above mentioned regular teleconferencing sessions, during the year Bank also held Corporate Analyst Briefing Session on November 11, 2020 using the online meeting platform. Session was attended by senior management of MCB Bank Limited and various analysts and investors. CFO of the bank presented a detailed analysis of Bank's performance along with future outlook; session was followed by Q & A session.

## Issues Raised in the Last Annual General Meeting (AGM)

The proceedings of the 72nd Annual General Meeting of the shareholders of MCB Bank Limited was held on Thursday, March 19, 2020 at 11:00 am, Nishat Hotel, Emporium Mall, Lahore. Amidst the threat posed by the ongoing COVID-19 outbreak, the proceedings of the meeting were also covered through a video link in order to avoid crowd gathering in accordance with the directives of the Government.

Mian Mohammad Mansha, the Chairman of the Board of Directors, presided over the meeting. The meeting was attended by Board members of the Bank including the Chief Executive Officer along with the Chief Financial Officer and the Company Secretary; either in person or through a video link.

The company secretary invited the CFO to present key highlights of the audited financial statements for the year 2019 and elucidate on the salient features of the Banks' performance. There were no significant issues raised in the last AGM that are pending implementation, however, the shareholders while appreciating the overall growth in Bank's financial performance sought some general clarifications and comments on the progress of the Bank.

One of the shareholders enquired about the reasons for increase in tax charge for the year 2019. Responding to the shareholders query, the CFO apprised the forum that in addition to increased profitability, Super Tax charge, which was initially levied vide Finance Act, 2015 had continued and was extended vide Finance Act 2019 with retrospective effect thereby causing recognition of an additional charge for the tax year 2018 in 2019.

Another shareholder enquired about the expected impact of COVID-19 outbreak on the Bank's financial performance and its operating environment in general. The CFO replied that while the management was proactively monitoring the evolving scenario and the Bank remained well poised to respond to the emanating risks, the ultimate impact from the outbreak still remained extremely uncertain and largely dependent on the pandemics' pathway and ramifications of the policy measures adopted by regulatory, monetary and fiscal authorities for combating the outbreak.

The CEO also addressed the forum and informed the shareholders that the Bank remained a well-capitalized institution with a capital base well above the regulatory limits and Basel capital requirements. He mentioned that the Bank had the highest cash dividend per share in the industry and also remained one of the prime stocks traded in the Pakistani equity markets reflected by its highest market capitalization in the financial institution category as at December 31, 2019.

The shareholders appreciated the financial performance of the Bank and congratulated the Board of Directors and the management for the same.

Following businesses were also discussed during the AGM:

- Consideration and approval of Annual Accounts of 2019
- Approval for alteration in the Articles of Association of the Bank
- Approval for scale of remuneration including additional remuneration for Board of Directors
- Approval of final cash dividend – 2019
- Appointment of External Auditors

## Statement of Value Added

|                                                                              | 2020<br>PKR (mln) | %           | 2019<br>PKR (mln) | %           |
|------------------------------------------------------------------------------|-------------------|-------------|-------------------|-------------|
| <b>Value Added</b>                                                           |                   |             |                   |             |
| Net interest income                                                          | 71,334            |             | 59,616            |             |
| Non interest income                                                          | 18,136            |             | 16,679            |             |
| Operating expenses excluding staff costs, depreciation, amortization and WWF | (13,455)          |             | (14,897)          |             |
| Provision against advances, investments & others                             | (7,313)           |             | (2,484)           |             |
| Value added available for distribution                                       | <u>68,702</u>     |             | <u>58,914</u>     |             |
| <b>Distribution of value added:</b>                                          |                   |             |                   |             |
| <b>To employees</b>                                                          |                   |             |                   |             |
| Remuneration, provident fund and other benefits                              | 15,806            | 23.01%      | 14,585            | 24.76%      |
| <b>To government</b>                                                         |                   |             |                   |             |
| Income tax                                                                   | 19,212            | 27.96%      | 16,125            | 27.37%      |
| <b>To shareholders</b>                                                       |                   |             |                   |             |
| Cash dividends to shareholders                                               | 23,701            | 34.50%      | 20,146            | 34.20%      |
| <b>To Society</b>                                                            |                   |             |                   |             |
| Donations                                                                    | 113               | 0.16%       | –                 | 0.00%       |
| <b>To expansion and growth</b>                                               |                   |             |                   |             |
| Depreciation, Amortization, Retained earnings and reserves                   | 9,871             | 14.37%      | 8,057             | 13.68%      |
|                                                                              | <u>68,702</u>     | <u>100%</u> | <u>58,914</u>     | <u>100%</u> |

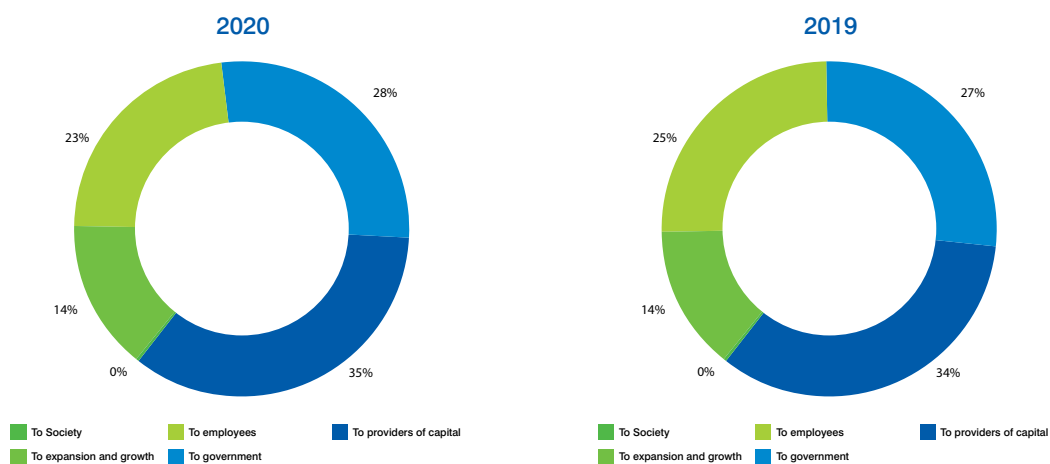

## Code of Conduct

- The Code of Conduct spells out the behaviour expected from employees of MCB Bank Limited (MCB), reflecting fairness, transparency and accountability. The Code of Conduct gives a quick reference check for acceptable business practices.
- However, the Code of Conduct does not replace defined and comprehensive HR Policies of MCB Bank Limited.
- MCB Bank is committed to conduct its business in accordance with the applicable laws, rules and regulations as defined by the State Bank of Pakistan by adhering to high standards of business ethics which reflect our corporate values.
- Adherence to the Code of conduct is mandatory for all employees of MCB Bank Ltd-Pakistan.

In line with code of conduct the employees of the bank shall

### Abidance of Laws / Rules

- Conform to and abide by the Bank rules and policies, wherever we operate and obey all lawful orders and directives which may from time to time be given by any person or persons under whose jurisdiction, superintendence or control, the persona will, for the time being, be placed. To undertake at all times compliance with and observation of all applicable laws, regulations and Bank policies, wherever the Bank operates.

### Integrity

- Conduct the highest standards of ethics, professional integrity and dignity in all dealings with the public, customers, investors, employees, and government officials, State Bank of Pakistan and fellow Bankers and non-engagement in acts discreditable to the Bank, profession and nation
- In case of awareness of any breaches of laws and regulations, frauds and other criminal activities or other similar serious incidents that might affect the interests of the Bank, the same shall be informed to the senior management immediately, including any issue, which may pose a reputational risk.
- Not use this policy to raise grievances or act in bad faith against colleagues.

### Professionalism

- Serve the Bank honestly and faithfully and strictly serve the Bank affairs and the affairs of its constituents, use utmost endeavor to promote the interest and goodwill of the Bank and show courtesy and attention

in all transactions/ correspondence with officers of Government, State Bank of Pakistan, other Banks & Financial Institutions, other establishments dealing with the Bank, the Bank constituents and the public.

- In case the employment is terminated for any reason, all rights to property and information generated or obtained as part of employment relationship will remain the exclusive property of MCB.
- Comply with the laws and regulations on money laundering and fraud prevention and immediate reporting of all suspicions of money laundering as per the guidelines provided in CDD & AML/ CFT Handbook and Anti-fraud Framework Policy for the Management and the staff.
- Not to engage in any act of violation of CDD & AML / CFT Handbook's guidelines given by the State Bank of Pakistan and be extremely vigilant in protecting MCB Bank from being misused by anyone to launder money by violating these guidelines.
- Ensure that all customer complaints are resolved quickly, fairly and recorded appropriately.

### Conflict of Interest

- Avoid all such circumstances in which there is personal conflict of interest, or may appear to be in conflict, with the interest of the Bank or its customers.
- In case of potential conflict of interest, the same should be declared immediately to senior management, action is taken to resolve and manage it in open manner and resolving the conflict of interest on their own would be avoided.
- Report to the Company Secretary within three (3) days about any sale and purchase of MCB shares (own or spouse) in case the annual basic salary exceeds Rs. 500,000/-.
- Not buy, sell or take position in any manner regarding MCB Bank shares during Closed Period, as announced by Company Secretary.

### Relatives and close friends

- Avoid conflict of interest arising, where an employee makes or participates in a decision which affects another person with whom one has a personal relationship (such as a relative, parent, spouse, cousin, close friend or personal associate). In cases where a conflict may arise, employees must advise their immediate line manager. Wherever possible, employees should disqualify themselves from dealing with those persons in such situations.



## Code of Conduct

### Political Participation

- Not obtain membership of any political party, or take part in, subscribing in aid of, or assist in any way, any political movement in or outside of Pakistan or relating to the affairs of Pakistan.
- Not express views detrimental to the ideology, sovereignty or integrity of Pakistan.
- Not canvass or otherwise interfere or use influence in connection with or take part in any election as a candidate to a legislative/local body or issue an address to the electorate whether in Pakistan or elsewhere. However, the right to vote can be exercised.
- Not bring or attempt to bring political or other pressure/ influence directly or indirectly to bear on the authorities/ superior officers or indulge in derogatory pamphleteering, contribute, or write letters to the newspapers, anonymously or in own name contribute or appear in media, with an intent to induce the authority/ superior officers to act in a manner inconsistent with rules, in respect of any matter relating to appointment, promotion, transfer, punishment, retirement or for any other conditions of service of employment.

### Financial Interest

- Not indulge in any of the following activities without prior permission of competent authority (GH - HRM for VP & below and President for SVP & Above):
- Borrow money from or in any way place myself under pecuniary obligation to a broker or moneylender or anyone, including but not limited to any firm, company or person having dealings with the Bank.
- Buy or sell stock, shares or securities of any description without funds to meet the full cost in the case of purchase or scripts for delivery in the case of sale. However, a bona-fide investment of own funds in such stocks, shares and securities as wished can be made.
- Lend money in private capacity to a constituent of the Bank or have personal dealings with a constituent in the purchase or sale of bills of exchange, Government paper or any other securities.
- Act as agent for an insurance company otherwise than as agent for or on behalf of the Bank.
- Be connected with the formation or management of a joint stock company or hold office of a director.
- Engage in any other commercial business or pursuit, either on own account or as agent for another or others.

- Engage in any outside employment or office whether stipendiary or honorary during my employment with MCB Bank.
- Undertake part-time work for a private or public body or private person, or accept fee thereof.
- Any kind of trading advice concerning the securities of MCB Bank or to third parties even when such director, officer or employee does not possess material nonpublic information about MCB Bank.
- In reviewing or approving a loan application from a corporation wherein holding office as director, partner or guarantor.

### Gift, Favors Etc.

- Not use the employment status to seek personal gain from those doing business or seeking to do business with MCB, nor accept such gain if offered.
- Not accept any gift, favors, entertainment or other benefit the size or frequency of which exceeds normal business contacts from clients, stakeholders, colleagues of the Bank or from persons likely to have dealings with the Bank including candidates for employment in the Bank.
- Reporting in writing to immediate supervisor within three working days in case any sizeable gift / favor is received from any third parties.

### Confidentiality

- Maintain the privacy and confidentiality (during the course of employment and after its termination for whatever reason), of all the information acquired during the course of professional activities and refrain from disclosing the same unless otherwise required by statutory authorities / law. Inside information about Bank's customers/affairs including customer data, product manuals, confidential financial and business information of the Bank etc., shall not be used for own gain or for that of others either directly or indirectly.
- Not trade in relevant investments or indulge in giving tips to another person or dealing on behalf of relatives, friends or any other third parties, whilst in possession of non-public price sensitive information.
- Not disclose to a customer or customers or to any irrelevant quarter(s) that a suspicious transaction or related information is being reported for investigation unless any law enforcement agency requires any lawful information. (Only authorized representatives can pass on information to Law enforcing agencies after obtaining clearance on information content from relevant GH / BH(for RBG) and LAG representative).

# Code of Conduct

## Data Security

- Only access or update the system and data according to the authority given by the Bank. Any unauthorized access or updation will hold the person liable for a penal action by the Bank in accordance with HR policies.
- Not compromise access to system by communicating identification and /or passwords to others.
- Ensure that material non-public information is secure. Not discuss such information in public places where it can be overheard, such as elevators, restaurants, taxis and airplanes.

## Communication / Contact with Media

- Be truthful in all advertisings and promotional efforts and to publish only accurate information about the Bank operations under valid authority as prescribed in the Bank policy.
- Not give any kind of confidential information or interview on behalf of the Bank or in my official capacity in the print/electronic media or road / talk shows or participate or act in television/stage plays or in any media or cinema without having permission from the Head of Corporate Communication & GH - HRM.

## Speak Up

- To inform line management & HR of any perceived wrong doing / malpractice at any level, as an obligation to report it under the Bank whistle blowing program / policy.

## Business / Work Ethics

- Respect fellow colleagues and work as a team. To be, at all times, courteous and not to let any personal differences affect work.

## Customer Centricity

- Treat every customer of the Bank with respect and courtesy.
- Be responsive to customer complaints, and to feedback on products and services.
- Provide relevant, complete and clear information to customers to the best of one's knowledge.
- Sell products or services to customers that are within the legitimate scope of one's job.
- Remain update with the latest products of the Bank, and provide all relevant information to the customers.

## Personal Responsibility

- Safeguard as a personal responsibility, both the tangible and intangible assets of MCB and its customer(s) that are under personal control and not to use Bank assets for personal benefits except where permitted by MCB.
- Not use any Bank facilities including a car or telephone to promote trade union activities, or carry weapons into Bank premises unless so authorized by the management, or to carry on trade union activities during office hours, or in banking premises, or subject Bank officials to physical harassment or abuse.

## Punctuality

- Ensure attendance and punctuality as per HR policies, departmental requirements & job standards and for any absence during working hours obtain written permission of the immediate supervisor.

## Dress Code

- Maintain a standard of personal hygiene / neatness and follow MCB Bank dress code policy in true spirit to promote a professional work environment during office hours.

## International Travel

- Be culturally sensitive to the socio-cultural norms of the host country.
- Represent Country and organization by conforming to high standards of personal and professional ethics at all times.

## Work Environment

- Cooperate in maintaining a healthy and productive work environment and not get engaged in the selling, manufacturing and distributing using any illegal substance or being under the influence of illegal drugs or alcohol while on the job.
- Ensure strict adherence to all policies of the Bank, as announced by the management from time to time and contribute utmost effort in maintaining a conducive work environment.

## Usage of Communication Tools

- Ensure strict adherence to the use of internet, emails and telephone provided by the Bank for official use only.
- Never use the Bank system to transmit or receive electronic images or text containing ethnic slurs, social epithets or anything that might be construed as harassing, offensive or insulting to others.

## Code of Conduct

- Never utilize Bank system to disseminate any material detrimental to the ideology, sovereignty or integrity of Pakistan.
- Never indulge and /or utilize the Bank system for supporting any terrorist activity within and / or outside Pakistan.

### Reporting and Accountability

- Maintain all books, data, information and records with scrupulous integrity, reflecting in an accurate and timely manner and to ensure that all business transactions are reported and documented correctly according to the business practices. Ensure facts are not misinterpreted / misused /tampered pertaining to:
  - Issuing an incorrect account statement / any other information for any customer or fellow employees / management.
  - Placing a fake claim for reimbursement of any expenses (including medical insurance).
  - Unrecorded or recorded funds / assets or any other Bank's documents.
  - Posting of false, artificial or misleading entries in the books or record of the Bank.
  - Intimate line management and HRM of any changes in the personal circumstances relating to service tenure and other related benefits, provided by the Bank.

### Ethics for working with Female Employees

#### Gender Discrimination In Employment Training / Promotion

- Ensure adherence to the guidelines of MCB Bank's non-discrimination on the basis of gender which limits the individual's right of recruitment, future training, promotion and any other related benefits.

#### Zero Tolerance for Favoritism or Discrimination

- Not be a part of any undue favor / discriminatory advantage to any colleague / subordinate staff.

#### Personal Space

- No right to intrude on the personal space / close proximity of any staff particularly females.

#### Female Staff/Employee Privacy

- Recognize that female staff have more privacy and sensitivity needs in keeping with our cultural norms. Therefore, behaviour towards them must reflect that sensitivity, respect and consideration.

#### Harassment Against Women

- Any type of harassment is not acceptable at MCB Bank. Harassment occurs when someone's actions or words, based on gender, race, sexuality, caste, creed, and color are unwelcome, violate another person's dignity and creates a hostile environment. (Reference to HR Policy Manual section 6, 6.2.5, Protection against harassment of women at the workplace Act, 2010)
- Accordingly, not engage in harassment in any form. It may include objectionable epithets, threatened or actual physical harm and intimidating conduct directed against the individual that negatively affects the performance and well-being of an individual.

#### Sexual Harassment

- Keeping in mind the Bank's policy with reference to the Protection against harassment of Women at the Workplace Act, 2010, adherence to all guidelines given by the Bank.

#### Communication

- Not send sexually explicit or offensive communications and respect the privacy of fellow employee especially female employees. Following factors should be adhered to in order to maintain effective communication and ethical standards:
  1. Not send any electronic mail that is abusive or threatens the safety of an Individual(s).
  2. Always use a professional tone in all official communications.
  3. Be careful when using sarcasm and humor

### Workplace bullying

Refrain from any form of Workplace bullying:

- Shouting or swearing at an employee or otherwise verbally abusing him / her.
- Singling out an employee for excessive criticism/public humiliation.
- Excluding an employee from company activities and undermining his / her work contributions.
- Language or actions that embarrass or humiliate an employee.
- Inappropriate practical jokes, especially if they are targeted.

### Insider Trading

Comply with insider trading policy and to abide by all guidelines provided in the policy.

## Statement on Internal Controls

The internal control structure of MCB Bank Limited (Bank) comprises the Board of Directors, Senior Management, Risk Management Group, Financial Control Group, Operations Group, Compliance & Controls Group, Audit & Risk Assets Review (Audit & RAR) Group, Internal Control Units (ICUs) within all Groups and the controls & self-assessment procedures implemented at other functions within the Bank. The Bank's management is responsible to establish and maintain an adequate and effective system of internal controls and procedures under the policies approved by the Board. The management is also responsible for evaluating effectiveness of the Bank's internal control system that covers material matters through identification of control objectives as well as review of significant policies and procedures.

Bank's internal control system has been designed to identify and mitigate the risk of failure to achieve overall business objectives of the Bank. Internal controls and policies are designed to provide reasonable assurance regarding the effectiveness and efficiency of the Bank's operations, reliability of financial information and compliance with applicable laws & regulations. However, it needs to be stated that systems are designed to manage, rather than eliminate the risk of failure to achieve the business objectives and can only provide reasonable and not absolute assurance against material misstatement or loss.

The management of the Bank has adopted the Integrated Framework on Internal Controls issued by the Committee of Sponsoring Organizations of the Treadway Commission (COSO) and has completed all the stages as set out in the roadmap provided by the State Bank of Pakistan (SBP) through the Guidelines on Internal Controls. Bank's assessment included documenting, evaluating and testing of the design and operating effectiveness of its Internal Controls over Financial Reporting (ICFR). Bank has developed a management testing and reporting framework for monitoring ongoing operating effectiveness of key controls.

Concerted efforts are made by every Group to improve the control environment at grass root level by regularly reviewing and streamlining procedures to prevent and rectify control lapses as well as imparting training for improvement at various levels. Compliance & Controls Group (CCG), through its specialized teams and centralized automated solutions, also oversees adherence to the regulatory requirements, with specific emphasis on Anti-Money Laundering (AML) / Combatting the Financing of Terrorism (CFT) / Countering Proliferation Financing (CPF). In addition, CCG also leads the Management's Committee on AML/CFT/CPF for oversight of AML/CFT/CPF compliance with respect to relevant laws, regulations, policies and procedures.

The scope of Audit & RAR Group, independent from the management, inter alia includes, review and assessment of the adequacy and effectiveness of the control activities across the Bank as well as evaluation of compliance

with the Bank's prescribed policies and procedures. All significant / material findings of the internal audit activities are reported to the Board's Audit Committee. The Audit Committee actively monitors implementation of internal controls to ensure that identified risks are mitigated to safeguard interest of the Bank.

All significant and material findings of the internal and external auditors as well as observations of the regulators are addressed on priority by the management and their status is reported periodically to the Board's Audit Committee and the Board's Compliance Review & Monitoring Committee respectively, which ensures that the management takes appropriate corrective actions and put in place a system to minimize repetition for strengthening of the control environment.

Senior management team, through different Management Sub-Committees, monitor resolution / compliance of issues identified by the Regulators, Statutory Auditors as well as Audit & RAR Group. Periodic meetings of these Management Sub-committees are held to ensure expeditious resolution / compliance of aforementioned issues. The Management Committee chaired by the Bank's President / Chief Executive Officer monitors the performance of sub-committees on annual basis.

In accordance with SBP's directives and as stated earlier, the Bank has completed all stages of ICFR roadmap and a Long Form Report (LFR) on the assessment of Bank's ICFR for the year 2019 issued by the statutory auditors has been submitted to SBP in compliance with its directives stated in OSED Circular No. 1 of 2014 dated February 07, 2014. None of the deficiencies identified had a material impact on Financial Reporting.

Based upon the results derived through ongoing testing of financial reporting controls and internal audits carried out during the year, the management considers that the Bank's existing internal control system is adequate and has been effectively implemented and monitored. The management will continue enhancing its coverage and compliance with the SBP Guidelines on Internal Controls and further strengthening its control environment on an ongoing basis.

Based on the above, the Board of Directors has duly endorsed management's evaluation of internal controls including ICFR in the Directors' report.



**Farid Ahmad**  
Chief Compliance Officer



**Kamran Zaffar Muggo**  
Group Head Operations



**Hammad Khalid**  
Chief Financial Officer



**Muhammad Farooq Wasi**  
Chief Internal Auditor

# Statement of Compliance with Listed Companies

(Code of Corporate Governance) Regulations, 2019

## MCB Bank Limited

For the year ended December 31, 2020

MCB Bank Limited (“MCB” or the “Bank”) has complied with the requirements of the Listed Companies (Code of Corporate Governance) Regulations, 2019 (the “Regulations”) in the following manner:

1. The total number of Directors including President & CEO are 13 as per the following:
  - a. Male: 12
  - b. Female: 01
2. The composition of the Board is as follows:

| Category                                        | Name                                                                                                                                                                                       |
|-------------------------------------------------|--------------------------------------------------------------------------------------------------------------------------------------------------------------------------------------------|
| <b>Independent Directors</b>                    | Mr. Yahya Saleem<br>Mr. Salman Khalid Butt<br>Mr. Shahzad Hussain<br>Mr. Masood Ahmed Puri                                                                                                 |
| <b>Non-Executive Directors</b>                  | Mian Mohammad Mansha<br>Mr. S. M. Muneer<br>Mr. Muhammad Tariq Rafi<br>Mian Umer Mansha<br>Mr. Mohd Suhail Amar Suresh bin Abdullah<br>Mr. Muhammad Ali Zeb<br>Mr. Shariffuddin Bin Khalid |
| <b>Executive Director (President &amp; CEO)</b> | Mr. Imran Maqbool                                                                                                                                                                          |
| <b>Female Director (Non-Executive)</b>          | Mrs. Iqraa Hassan Mansha                                                                                                                                                                   |

The Bank has twelve (12) elected directors and one CEO who is a deemed director. The fraction of 0.33 is below half (0.50) and accordingly, the same has not been rounded up as one.

3. The directors have confirmed that none of them is serving as a director on more than seven listed companies, including the Bank;
4. The Bank has prepared a ‘Code of Conduct’ and has ensured that appropriate steps have been taken to disseminate it throughout the Bank along with its supporting policies and procedures;
5. The Board has developed a vision/mission statement, overall corporate strategy and significant policies of the Bank. The Board has ensured that complete record of particulars of significant policies along with their date of approval or updating is maintained by the Bank;
6. All the powers of the Board have been duly exercised and decisions on relevant matters have been taken by the Board/ Shareholders as empowered by the relevant provisions of the Companies Act, 2017 (the “Act”) and the Regulations;
7. The meetings of the Board were presided over by the Chairman and, in his absence, by the Vice Chairman or a director elected by the Board for this purpose. The Board has complied with the requirements of Act and the Regulations with respect to frequency, recording and circulating minutes of meeting of the Board;
8. The Board has a formal policy and transparent procedures for remuneration of directors in accordance with the Act and the Regulations;
9. All the Board Members except one either have minimum education and experience as required under Regulation 19 for exemption from Directors Training Program, or have already completed Directors Training Program pursuant to the requirements of the Regulations;
10. During the year, there was no any such appointment of the Chief Financial Officer (“CFO”), the Company Secretary and the Head of Internal Audit;

11. The CFO and the President & Chief Executive Officer (“CEO”) duly endorsed the financial statements before approval of the Board;
12. The Board has formed its eight (8) Committees. The names and composition of Committees along with the details of Committee(s) Members have been given in the Section on Corporate Governance;
13. The Terms of Reference (“TORs”) of the aforesaid Committees have been formed, documented and advised to the respective Committee for compliance;
14. The frequency of the Committee meetings has been given in the Section on Corporate Governance;
15. The Board has set up an effective internal audit function which is considered suitably qualified and experienced for the purpose and conversant with the policies and procedures of the Bank;
16. The Statutory Auditors of the Bank have confirmed that they have been given a satisfactory rating under the Quality Control Review program of the Institute of Chartered Accountants of Pakistan (“ICAP”) and registered with Audit Oversight Board of Pakistan, that they and all their partners are in compliance with International Federation of Accountants (“IFAC”) guidelines on code of ethics as adopted by the ICAP and that they and the partners of the firm involved in the audit are not a close relative (spouse, parent, dependent and non-dependent children) of the President & CEO, CFO, head of Internal Audit, Company Secretary or director of the Bank;
17. The Statutory Auditors or the persons associated with them have not been appointed to provide other services except in accordance with the Act, these regulations or any other regulatory requirement and the auditors have confirmed that they have observed IFAC guidelines in this regard; and
18. We confirm that all requirements of regulations 3, 6, 7, 8, 27, 32, 33 and 36 of the Regulations have been complied with.

**For and on behalf of the Board of Directors**

*Imran Maqbool*

**Imran Maqbool**  
President & CEO

*Mian Mohammad Mansha*

**Mian Mohammad Mansha**  
Chairman

**MCB Bank Limited**

**February 10, 2021**  
**Lahore**

# Independent Auditor's Review Report

To the members of MCB Bank Limited

## Review Report on the Statement of Compliance contained in Listed Companies (Code of Corporate Governance) Regulations, 2019

We have reviewed the enclosed Statement of Compliance with the Listed Companies (Code of Corporate Governance) Regulations, 2019 (the Regulations) prepared by the Board of Directors of MCB Bank Limited ("the Bank") for the year ended 31 December 2020, in accordance with the requirement of regulation 36 of the Regulations.

The responsibility for compliance with the Regulations is that of the Board of Directors of the Bank. Our responsibility is to review whether the Statement of Compliance reflects the status of the Bank's compliance with the provisions of the Regulations and report if it does not and to highlight any non-compliance with the requirements of the Regulations. A review is limited primarily to inquiries of the Bank's personnel and review of various documents prepared by the Bank to comply with the Regulations.

As a part of our audit of the financial statements we are required to obtain an understanding of the accounting and internal control systems sufficient to plan the audit and develop an effective audit approach. We are not required to consider whether the Board of Directors' statement on internal control covers all risks and controls or to form an opinion on the effectiveness of such internal controls, the Bank's corporate governance procedures and risks.

The Regulations require the Bank to place before the Audit Committee, and upon recommendation of the Audit Committee, place before the Board of Directors for their review and approval, its related party transactions. We are only required and have ensured compliance of this requirement to the extent of the approval of the related party transactions by the Board of Directors upon recommendation of the Audit Committee.

Based on our review, nothing has come to our attention which causes us to believe that the Statement of Compliance does not appropriately reflect the Bank's compliance, in all material respects, with the requirements contained in the Regulations as applicable to the Bank for the year ended 31 December 2020.

**Date: February 26, 2021**  
**Lahore**

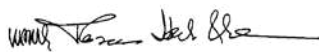  
**KPMG Taseer Hadi & Co.**  
Chartered Accountants

## Report of the Audit Committee

The Audit Committee comprises four (4) non-executive directors including one Independent Director, one being Chairman of the Audit Committee. Further, two qualified chartered accountants with diversified professional experience in various sectors are members of the Audit Committee. Moreover, one of the members is fellow member of Chartered Institute of Management Accountants, (United Kingdom). The members of the Audit Committee are qualified professionals and possess enriched experience of working at the Boards & Senior Management levels of entities operating in both banking and non-banking sectors.

### Role of audit committee to discharge its responsibilities towards financial statements and committee overall approach to risk management:

- In line with the requirements of Listed Companies (Code of Corporate Governance) Regulations – 2019 and Guidelines for Internal Audit Function issued by the State Bank of Pakistan, the Chief Internal Auditor functionally reports to the Board's Audit Committee and administratively to Bank's President / CEO. The Committee ensures staffing of the internal audit function with personnel of sufficient internal audit knowledge and experience, as well as equipping of the function with necessary resources and authority to execute their responsibilities independently and objectively.
- The committee approves and oversees the risk assessment, annual audit plan and related enablers/budget along with resource requirements of Audit & Risk Assets Review (Audit & RAR) Group.
- All significant and material findings of the internal audit activities are reported to the Audit Committee. The Audit Committee actively monitors implementation of internal controls to ensure that identified risks are mitigated to safeguard the interest of the Bank.
- Audit Committee actively engages in the review of the Bank's quarterly, half yearly and annual financial statements as well as oversight of internal audit activities in accordance with the requirements of Listed Companies (Code of Corporate Governance) Regulations – 2019 and the Charter of the Board Audit Committee, duly approved by the Board of Directors.
- The Committee understands its responsibility to ensure that the significant issues in relation to financial statements are addressed properly by debating and challenging the critical judgments and estimates made by the management. Furthermore, Audit & RAR group also reviews the Bank's quarterly, half yearly and annual financial statements and discusses the significant matters with management.
- The Committee ensures the independence of external auditor, effectiveness of external audit process and appointment/ reappointment of external auditor by performing the followings:
  - Review the terms of engagement and ensure that external auditor is independent to the Bank in terms of local regulatory requirements.
  - Ensure that external auditors have resources and professional qualification to conduct the audit.
  - The Auditors have been allowed direct access to the Audit Committee.
  - Discuss external auditors' feedback on the Bank's critical accounting estimates and judgments.
  - Discuss the significant control issues and significant audit matters identified by external auditors.

### Audit Committee held five (5) meetings, during the year 2020, and following matters (including significant matters) were discussed:

- Review of the Bank's periodic financial statements, including disclosure of related party transactions prior to their approval by the Board of Directors (BOD).
- Review of status of compliance against observations highlighted by internal and external auditors, including regular updates on the rectification actions taken by the management in response to the audit findings.
- Review of status of implementation of decisions of BOD and its Sub-Committees.
- Review of significant issues (including critical repeated observation) highlighted by internal auditors during audits/reviews of branches and other functions of the Bank along with management actions thereon.
- Review of analysis related to significant frauds and forgery incidents in the Bank, with specific focus on nature and reasons along with Management action(s) thereof. Review of annual fraud risk assessment along with action plan for strengthening of internal controls.
- Review, approval and oversight of Risk Assessment, Annual Audit Plan and related enablers/budget along with resource requirements of Audit & Risk Assets Review (Audit & RAR) Group.
- Review of status of trainings imparted to internal audit staff, along with status of activities under Quality Assurance & Improvement Program of Internal Audit.
- Review of resolution status of complaints lodged under the Bank's Whistle Blowing Program.
- Review of performance of Chief Internal Auditor against Key Performance Indicators (KPIs) for Audit & RAR Group. Review and approval of KPIs of Chief Internal Auditor for 2021.
- Review & approval of Audit Group's increments, bonuses, promotions and performance appraisal of Chief Internal Auditor.
- Review of progress on Audit Group's Strategic Initiatives and Milestones (2020 – 2022).



- Recommendation of scope and appointment of external auditors, including audit and consultancy fee. Audit Committee further ensured coordination between internal and external auditors.
- The Committee reviewed Annual Assessment by Audit & RAR Group on adequacy & effectiveness of Bank's processes for controlling and managing its risks in all core areas of the Bank's (including subsidiaries audited in year 2020) operations.
- The Committee reviewed annual confirmation regarding organizational independence of Audit & RAR Group.
- In addition to the above, the Committee also reviewed and recommended the following to the Board for approval:
  - Global Internal Audit Policy Version 3.0
  - Policy for Engagement of External Auditor on Providing Assurance and Non-Assurance Services of MCB Sri Lanka
  - IFRS-9 ECL Provisioning Policy MCB – Bahrain, Version 2.0
  - IFRS-9 ECL Provisioning Policy MCB – UAE Operations, Version 2.0
  - Investor Relations Policy - Ver. 3.0
  - Internal Audit Manual Version 8.0
  - Internal Audit Manual Sri Lanka Operations Version 4.0

### Committee performance

Performance of the Audit Committee is annually reviewed by the Board of Directors and Board appreciated the Committee's role in thoroughly reviewing the financial statements and Bank's internal audit function and other financial matters of critical importance.

### Internal Control Framework and role of Internal audit

The Bank's internal control structure comprises the Board of Directors, Senior Management, Risk Management Group, Compliance & Controls Group, Financial Control Group, the controls and self-assessment procedures implemented at other functions within the Bank; and Audit & Risk Assets Review (RAR) Group. The Management is responsible for establishing and maintaining a system of adequate and effective internal controls and procedures for implementing strategy and policies, as approved by the Board of Directors. The Bank has adopted integrated framework on Internal Controls issued by the Committee of Sponsoring Organizations of the Treadway Commission (COSO) and has completed all the stages, as set out in the roadmap provided by the State Bank of Pakistan (SBP) through the Guidelines on Internal Controls.

Audit & RAR Group has performed its role effectively on both assurance and consultative fronts. The Group played pivotal role in evaluating the efficacy of Bank's control systems and contributing towards their ongoing effectiveness by enhancing visibility of the Board and the management on the risk management and internal control matters of the Bank. All significant and material findings of the internal audit activities are reported to the Audit Committee of the Board of Directors. The Audit Committee actively monitors implementation of internal controls to ensure that identified risks are mitigated to safeguard the interest of the Bank.

The Audit Committee will continue to provide guidance to the Audit & RAR Group and the Management for further strengthening of Bank's risk management practices and internal control environment.

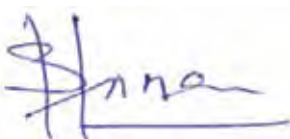

**Shahzad Hussain**  
Chairman Audit Committee  
MCB Bank Limited  
Lahore



# Unconsolidated Financial Statements

MCB Bank Limited

# Independent Auditor’s Report

To the members of MCB Bank Limited

## Report on the Audit of the Unconsolidated Financial Statements

### Opinion

We have audited the annexed unconsolidated financial statements of MCB Bank Limited (“the Bank”), which comprise the unconsolidated statement of financial position as at December 31, 2020 and the unconsolidated profit and loss account, the unconsolidated statement of comprehensive income, the unconsolidated statement of changes in equity and the unconsolidated statement of cash flows for the year then ended, along with unaudited certified returns received from the branches except for 50 branches which have been audited by us and notes to the unconsolidated financial statements, including a summary of significant accounting policies and other explanatory information and we state that we have obtained all the information and explanations which, to the best of our knowledge and belief, were necessary for the purposes of the audit.

In our opinion and to the best of our information and according to the explanations given to us, the unconsolidated statement of financial position, the unconsolidated profit and loss account, the unconsolidated statement of comprehensive income, the unconsolidated statement of changes in equity and the unconsolidated statement of cash flows together with the notes forming part thereof conform with the accounting and reporting standards as applicable in Pakistan, and, give the information required by the Banking Companies Ordinance, 1962 and the Companies Act, 2017 (XIX of 2017), in the manner so required and respectively give a true and fair view of the state of the Bank’s affairs as at December 31, 2020 and of the profit and other comprehensive income, the changes in equity and its cash flows for the year then ended.

### Basis for Opinion

We conducted our audit in accordance with International Standards on Auditing (ISAs) as applicable in Pakistan. Our responsibilities under those standards are further described in the Auditor’s Responsibilities for the Audit of the Unconsolidated Financial Statements section of our report. We are independent of the Bank in accordance with the International Ethics Standards Board for Accountants’ Code of Ethics for Professional Accountants as adopted by the Institute of Chartered Accountants of Pakistan (the Code) and we have fulfilled our other ethical responsibilities in accordance with the Code. We believe that the audit evidence we have obtained is sufficient and appropriate to provide a basis for our opinion.

### Key Audit Matters

Key audit matters are those matters that, in our professional judgment, were of most significance in our audit of the unconsolidated financial statements of the current year. These matters were addressed in the context of our audit of the unconsolidated financial statements as a whole, and in forming our opinion thereon, and we do not provide a separate opinion on these matters.

Following are the Key Audit Matters:

| S. No. | Key Audit Matters                                                                                                                                                                                                                                                                                                                                                                                                                                                                                                                                                                                                             | How the matter was addressed in our audit                                                                                                                                                                                                                                                                                                                                                                                                                                                                                                                                                                                                                                                                                              |
|--------|-------------------------------------------------------------------------------------------------------------------------------------------------------------------------------------------------------------------------------------------------------------------------------------------------------------------------------------------------------------------------------------------------------------------------------------------------------------------------------------------------------------------------------------------------------------------------------------------------------------------------------|----------------------------------------------------------------------------------------------------------------------------------------------------------------------------------------------------------------------------------------------------------------------------------------------------------------------------------------------------------------------------------------------------------------------------------------------------------------------------------------------------------------------------------------------------------------------------------------------------------------------------------------------------------------------------------------------------------------------------------------|
| 1      | <p><b>Provision against advances</b></p> <p>Refer to note 11 and the accounting policies in notes 4.2 (b) and 6.4 to the unconsolidated financial statements.</p> <p>The Bank’s advances to the customers represent 26.34% of its total assets as at 31 December 2020 and are stated at Rs. 462.94 billion which is net of provision of Rs. 50.61 billion at the year end.</p> <p>The provision against advances was identified as a key audit matter in our audit as it involves a considerable degree of management judgment and compliance with the Prudential Regulations (PRs) issued by the State Bank of Pakistan.</p> | <p>Our audit procedures in respect of provision against loans and advances included the following:</p> <ul style="list-style-type: none"> <li>• Assessing the design and operating effectiveness of manual and automated controls over classification and provisioning of advances including: <ul style="list-style-type: none"> <li>- The accuracy of data input into the system used for disbursement and recovery of credit facilities;</li> <li>- Controls over correct classification of non-performing advances on time based criteria;</li> <li>- Controls over accurate computation and recording of provisions; and</li> <li>- Controls over the governance and approval process related to provision.</li> </ul> </li> </ul> |

| S. No.   | Key Audit Matters                                                                                                                                                                                                                                                                                                                                                                                                                                                                                                                                                                                                                                                                                                                                                                                                                                                                                                                                                                 | How the matter was addressed in our audit                                                                                                                                                                                                                                                                                                                                                                                                                                                                                                                                                                                                                                                                                                                                                                                                                                                                                                                                                                                                                                   |
|----------|-----------------------------------------------------------------------------------------------------------------------------------------------------------------------------------------------------------------------------------------------------------------------------------------------------------------------------------------------------------------------------------------------------------------------------------------------------------------------------------------------------------------------------------------------------------------------------------------------------------------------------------------------------------------------------------------------------------------------------------------------------------------------------------------------------------------------------------------------------------------------------------------------------------------------------------------------------------------------------------|-----------------------------------------------------------------------------------------------------------------------------------------------------------------------------------------------------------------------------------------------------------------------------------------------------------------------------------------------------------------------------------------------------------------------------------------------------------------------------------------------------------------------------------------------------------------------------------------------------------------------------------------------------------------------------------------------------------------------------------------------------------------------------------------------------------------------------------------------------------------------------------------------------------------------------------------------------------------------------------------------------------------------------------------------------------------------------|
|          |                                                                                                                                                                                                                                                                                                                                                                                                                                                                                                                                                                                                                                                                                                                                                                                                                                                                                                                                                                                   | <ul style="list-style-type: none"> <li>• Testing, on a sample basis, credit exposures identified by the management as displaying indicators of impairment, assessed the number of days overdue and assessed appropriateness of amount reported for provision in accordance with the PRs;</li> <li>• Testing, on a sample basis, credit exposure where the management has not identified as displaying indicators of impairment challenged the management's assessment by reviewing the historical performances, account movement, financial ratios and reports on security maintained and formed our own view whether any impairment indicators are present;</li> <li>• For consumer advances, analyzed the days past due report for calculation of provision required in accordance with PRs; and</li> <li>• Checking, on a sample basis, accuracy of specific provision against non-performing advances and of general provision against consumer and SME advances by recomputing the provision made in accordance with the criteria prescribed under the PRs.</li> </ul> |
| <b>2</b> | <b>Valuation of Investments</b>                                                                                                                                                                                                                                                                                                                                                                                                                                                                                                                                                                                                                                                                                                                                                                                                                                                                                                                                                   |                                                                                                                                                                                                                                                                                                                                                                                                                                                                                                                                                                                                                                                                                                                                                                                                                                                                                                                                                                                                                                                                             |
|          | <p>Refer to note 10 and the accounting policies in notes 4.2 (c) and 6.2 to the unconsolidated financial statements.</p> <p>As at December 31, 2020 the Bank has investments classified as "Available-for-sale", "Held for trading" and "Held to maturity", amounting to Rs. 1,002.85 billion which in aggregate represent 57.06 % of the total assets of the Bank.</p> <p>Investments are carried at cost or fair value in the accordance with the Bank's accounting policy relating to their recognition. Provision against investments is based on impairment policy of the Bank which includes both objective and subjective factors.</p> <p>We identified the valuation of investments including determination of impairment allowance on investments classified as 'Available-for-sale' and "Held to maturity" as a key audit matter because of their significance in relation to the total assets of the Bank and judgment involved in assessing impairment allowance.</p> | <p>Our procedures in respect of valuation of investments included the following:</p> <ul style="list-style-type: none"> <li>• Assessing the design and tested the operating effectiveness of the relevant controls in place relating to valuation of investments;</li> <li>• Checking, on a sample basis, the valuation of investments to supporting documents, externally quoted market prices and break-up values; and</li> <li>• Evaluating the management's assessment of available for sale and held to maturity investments for any additional impairment in accordance with the Bank's accounting policies and performed an independent assessment of the assumptions.</li> </ul>                                                                                                                                                                                                                                                                                                                                                                                    |

### **Information Other than the Unconsolidated Financial Statements and Auditor's Report Thereon**

Management is responsible for the other information. The other information comprises the information included in the Bank's Annual Report but does not include the unconsolidated financial statements and our auditors' report thereon.

Our opinion on the unconsolidated financial statements does not cover the other information and we do not express any form of assurance conclusion thereon.

In connection with our audit of the unconsolidated financial statements, our responsibility is to read the other information and, in doing so, consider whether the other information is materially inconsistent with the unconsolidated financial statements or our knowledge obtained in the audit, or otherwise appears to be materially misstated. If, based on the work we have performed, we conclude that there is a material misstatement of this other information, we are required to report that fact. We have nothing to report in this regard.

### **Responsibilities of Management and the Board of Directors for the Unconsolidated Financial Statements**

Management is responsible for the preparation and fair presentation of the unconsolidated financial statements in accordance with accounting and reporting standards as applicable in Pakistan, the requirements of Banking Companies Ordinance, 1962 and the Companies Act, 2017 (XIX of 2017) and for such internal control as management determines is necessary to enable the preparation of unconsolidated financial statements that are free from material misstatement, whether due to fraud or error.

In preparing the unconsolidated financial statements, management is responsible for assessing the Bank's ability to continue as a going concern, disclosing, as applicable, matters related to going concern and using the going concern basis of accounting unless management either intends to liquidate the Bank or to cease operations, or has no realistic alternative but to do so.

The Board of directors is responsible for overseeing the Bank's financial reporting process.

### **Auditor's Responsibilities for the Audit of the Unconsolidated Financial Statements**

Our objectives are to obtain reasonable assurance about whether the unconsolidated financial statements as a whole are free from material misstatement, whether due to fraud or error, and to issue an auditor's report that includes our opinion. Reasonable assurance is a high level of assurance, but is not a guarantee that an audit conducted in accordance with ISAs as applicable in Pakistan will always detect a material misstatement when it exists. Misstatements can arise from fraud or error and are considered material if, individually or in the aggregate, they could reasonably be expected to influence the economic decisions of users taken on the basis of these unconsolidated financial statements.

As part of an audit in accordance with ISAs as applicable in Pakistan, we exercise professional judgment and maintain professional skepticism throughout the audit. We also:

- Identify and assess the risks of material misstatement of the unconsolidated financial statements, whether due to fraud or error, design and perform audit procedures responsive to those risks, and obtain audit evidence that is sufficient and appropriate to provide a basis for our opinion. The risk of not detecting a material misstatement resulting from fraud is higher than for one resulting from error, as fraud may involve collusion, forgery, intentional omissions, misrepresentations, or the override of internal control.
- Obtain an understanding of internal control relevant to the audit in order to design audit procedures that are appropriate in the circumstances, but not for the purpose of expressing an opinion on the effectiveness of the Bank's internal control.
- Evaluate the appropriateness of accounting policies used and the reasonableness of accounting estimates and related disclosures made by management.
- Conclude on the appropriateness of management's use of the going concern basis of accounting and, based on the audit evidence obtained, whether a material uncertainty exists related to events or conditions that may cast significant doubt on the Bank's ability to continue as a going concern. If we conclude that a material uncertainty exists, we are required to draw attention in our auditor's report to the related disclosures in the unconsolidated financial statements or, if such disclosures are inadequate, to modify our opinion. Our conclusions are based on the

audit evidence obtained up to the date of our auditor's report. However, future events or conditions may cause the Bank to cease to continue as a going concern.

- Evaluate the overall presentation, structure and content of the unconsolidated financial statements, including the disclosures, and whether the unconsolidated financial statements represent the underlying transactions and events in a manner that achieves fair presentation.

We communicate with the Board of Directors regarding, among other matters, the planned scope and timing of the audit and significant audit findings, including any significant deficiencies in internal control that we identify during our audit.

We also provide to the Board of Directors with a statement that we have complied with relevant ethical requirements regarding independence, and to communicate with them all relationships and other matters that may reasonably be thought to bear on our independence, and where applicable, related safeguards.

From the matters communicated with the Board of Directors, we determine those matters that were of most significance in the audit of the unconsolidated financial statements of the current year and are therefore the key audit matters. We describe these matters in our auditor's report unless law or regulation precludes public disclosure about the matter or when, in extremely rare circumstances, we determine that a matter should not be communicated in our report because the adverse consequences of doing so would reasonably be expected to outweigh the public interest benefits of such communication.

#### **Report on Other Legal and Regulatory Requirements:**

Based on our audit, we further report that in our opinion:

- proper books of account have been kept by the Bank as required by the Companies Act, 2017 (XIX of 2017) and the returns referred above from the branches have been found adequate for the purpose of our audit;
- the unconsolidated statement of financial position, the unconsolidated profit and loss account, the unconsolidated statement of comprehensive income, the unconsolidated statement of changes in equity and the unconsolidated statement of cash flows together with the notes thereon have been drawn up in conformity with the Banking Companies Ordinance, 1962 and the Companies Act, 2017(XIX of 2017) and are in agreement with the books of account and returns;
- investments made, expenditure incurred and guarantees extended during the year were in accordance with the objects and powers of the Bank and the transactions of the Bank which have come to our notice have been within the powers of the Bank; and
- zakat deductible at source under the Zakat and Ushr Ordinance, 1980 (XVIII of 1980), was deducted by the Bank and deposited in the Central Zakat Fund established under section 7 of that Ordinance.

We confirm that for the purpose of our audit we have covered more than sixty per cent of the total loans and advances of the Bank.

The engagement partner on the audit resulting in this independent auditor's report is M. Rehan Chughtai.

Lahore  
Date: February 26, 2021

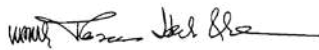  
KPMG Taseer Hadi & Co.  
Chartered Accountants

# Unconsolidated Statement of Financial Position

As at December 31, 2020

|                                                     | Note | 2020<br>(Rupees in '000) | 2019          |
|-----------------------------------------------------|------|--------------------------|---------------|
| <b>ASSETS</b>                                       |      |                          |               |
| Cash and balances with treasury banks               | 7    | 122,180,839              | 132,704,797   |
| Balances with other banks                           | 8    | 24,030,328               | 12,542,239    |
| Lendings to financial institutions                  | 9    | 17,139,453               | 1,090,058     |
| Investments                                         | 10   | 1,015,869,448            | 748,764,502   |
| Advances                                            | 11   | 462,941,787              | 496,678,874   |
| Fixed assets                                        | 12   | 58,027,904               | 58,271,245    |
| Intangible assets                                   | 13   | 938,458                  | 957,552       |
| Deferred tax assets                                 |      | –                        | –             |
| Other assets                                        | 14   | 56,334,253               | 64,142,748    |
|                                                     |      | 1,757,462,470            | 1,515,152,015 |
| <b>LIABILITIES</b>                                  |      |                          |               |
| Bills payable                                       | 16   | 23,980,692               | 11,821,698    |
| Borrowings                                          | 17   | 164,001,533              | 89,505,892    |
| Deposits and other accounts                         | 18   | 1,289,502,304            | 1,144,763,259 |
| Liabilities against assets subject to finance lease |      | –                        | –             |
| Subordinated debt                                   |      | –                        | –             |
| Deferred tax liabilities                            | 19   | 6,975,158                | 5,850,645     |
| Other liabilities                                   | 20   | 82,900,828               | 94,295,738    |
|                                                     |      | 1,567,360,515            | 1,346,237,232 |
| <b>NET ASSETS</b>                                   |      | 190,101,955              | 168,914,783   |
| <b>REPRESENTED BY</b>                               |      |                          |               |
| Share capital                                       | 21   | 11,850,600               | 11,850,600    |
| Reserves                                            | 22   | 80,696,335               | 77,591,253    |
| Surplus on revaluation of assets                    | 23   | 27,720,418               | 23,695,441    |
| Unappropriated profit                               |      | 69,834,602               | 55,777,489    |
|                                                     |      | 190,101,955              | 168,914,783   |
| <b>CONTINGENCIES AND COMMITMENTS</b>                | 24   |                          |               |

The annexed notes 1 to 48 and annexures I to II form an integral part of these unconsolidated financial statements.



Imran Maqbool  
President/Chief Executive



Hammad Khalid  
Chief Financial Officer



S.M. Muneer  
Director



Mian Umer Mansha  
Director

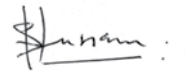

Shahzad Hussain  
Director



## Unconsolidated Profit and Loss Account

For the year ended December 31, 2020

|                                               | Note | 2020<br>(Rupees in '000) | 2019        |
|-----------------------------------------------|------|--------------------------|-------------|
| Mark-up / return / interest earned            | 26   | 136,075,705              | 138,291,896 |
| Mark-up / return / interest expensed          | 27   | 64,741,214               | 78,675,682  |
| Net mark-up / interest income                 |      | 71,334,491               | 59,616,214  |
| <b>NON MARK-UP / INTEREST INCOME</b>          |      |                          |             |
| Fee and commission income                     | 28   | 10,936,325               | 11,288,050  |
| Dividend income                               |      | 1,209,753                | 1,377,173   |
| Foreign exchange income                       |      | 2,525,340                | 2,894,735   |
| Income from derivatives                       |      | 4,087                    | 14,616      |
| Gain on securities                            | 29   | 3,332,032                | 832,846     |
| Other income                                  | 30   | 128,250                  | 271,533     |
| Total non-markup / interest Income            |      | 18,135,787               | 16,678,953  |
| Total Income                                  |      | 89,470,278               | 76,295,167  |
| <b>NON MARK-UP / INTEREST EXPENSES</b>        |      |                          |             |
| Operating expenses                            | 31   | 32,645,782               | 32,670,918  |
| Workers welfare fund                          |      | 964,978                  | 802,046     |
| Other charges                                 | 32   | 297,397                  | 236,357     |
| Total non-markup / interest expenses          |      | 33,908,157               | 33,709,321  |
| Profit before provisions                      |      | 55,562,121               | 42,585,846  |
| Provisions / (reversals) and write offs - net | 33   | 7,313,166                | 2,483,534   |
| Extra ordinary / unusual items                |      | –                        | –           |
| <b>PROFIT BEFORE TAXATION</b>                 |      | 48,248,955               | 40,102,312  |
| Taxation                                      | 34   | 19,211,654               | 16,125,473  |
| <b>PROFIT AFTER TAXATION</b>                  |      | 29,037,301               | 23,976,839  |
| <b>Rupees</b>                                 |      |                          |             |
| <b>Basic and diluted earnings per share</b>   | 35   | 24.50                    | 20.23       |

The annexed notes 1 to 48 and annexures I to II form an integral part of these unconsolidated financial statements.



Imran Maqbool  
President/Chief Executive



Hammad Khalid  
Chief Financial Officer



S.M. Muneer  
Director



Mian Umer Mansha  
Director

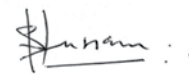

Shahzad Hussain  
Director

# Unconsolidated Statement of Comprehensive Income

For the year ended December 31, 2020

|                                                                                              | 2020             | 2019       |
|----------------------------------------------------------------------------------------------|------------------|------------|
|                                                                                              | (Rupees in '000) |            |
| <b>Profit after taxation for the year</b>                                                    | 29,037,301       | 23,976,839 |
| <b>Other comprehensive income</b>                                                            |                  |            |
| <b>Items that may be reclassified to profit and loss account in subsequent periods:</b>      |                  |            |
| Effect of translation of net investment in foreign branches                                  | 201,352          | 1,045,588  |
| Movement in surplus on revaluation of investments - net of tax                               | 4,021,886        | 6,975,891  |
|                                                                                              | 4,223,238        | 8,021,479  |
| <b>Items that will not be reclassified to profit and loss account in subsequent periods:</b> |                  |            |
| Remeasurement loss on defined benefit obligations - net of tax                               | (342,311)        | (474,421)  |
| Movement in surplus on revaluation of operating fixed assets - net of tax                    | -                | 6,908,341  |
| Movement in surplus on revaluation of non-banking assets - net of tax                        | 119,544          | 165,776    |
|                                                                                              | (222,767)        | 6,599,696  |
| <b>Total comprehensive income</b>                                                            | 33,037,772       | 38,598,014 |

The annexed notes 1 to 48 and annexures I to II form an integral part of these unconsolidated financial statements.



**Imran Maqbool**  
President/Chief Executive



**Hammad Khalid**  
Chief Financial Officer



**S.M. Muneer**  
Director



**Mian Umer Mansha**  
Director



**Shahzad Hussain**  
Director

# Unconsolidated Statement of Changes in Equity

For the year ended December 31, 2020

|                                                                                                                                   | Share capital |                                   | Capital reserve              |                 | Statutory reserve | Revenue reserve |                            | Surplus/(deficit) on revaluation of |             | Unappropriated profit | Total |
|-----------------------------------------------------------------------------------------------------------------------------------|---------------|-----------------------------------|------------------------------|-----------------|-------------------|-----------------|----------------------------|-------------------------------------|-------------|-----------------------|-------|
|                                                                                                                                   | Share premium | Non-distributable capital reserve | Exchange translation reserve | General reserve |                   | Investments     | Fixed / non-banking assets |                                     |             |                       |       |
| Balance as at December 31, 2018                                                                                                   | 11,850,600    | 23,751,114                        | 908,317                      | 1,629,543       | 29,259,007        | 18,600,000      | (2,758,144)                | 12,505,248                          | 53,532,044  | 149,277,729           |       |
| <b>Total comprehensive income for the year ended December 31, 2019</b>                                                            |               |                                   |                              |                 |                   |                 |                            |                                     |             |                       |       |
| Profit after taxation for the year ended December 31, 2019                                                                        | -             | -                                 | -                            | -               | -                 | -               | -                          | -                                   | 23,976,839  | 23,976,839            |       |
| Other comprehensive income - net of tax                                                                                           | -             | -                                 | -                            | 1,045,588       | -                 | -               | 6,975,891                  | 7,074,117                           | (474,421)   | 14,621,175            |       |
| Transfer to statutory reserve                                                                                                     | -             | -                                 | -                            | 1,045,588       | -                 | -               | 6,975,891                  | 7,074,117                           | 23,502,418  | 38,598,014            |       |
| Transfer in respect of incremental depreciation from surplus on revaluation of fixed assets to unappropriated profit - net of tax | -             | -                                 | -                            | -               | 2,397,684         | -               | -                          | -                                   | (2,397,684) | -                     |       |
| Surplus realized on disposal of revalued fixed assets - net of tax                                                                | -             | -                                 | -                            | -               | -                 | -               | -                          | (53,248)                            | 53,248      | -                     |       |
| Surplus realized on disposal of revalued non-banking assets - net of tax                                                          | -             | -                                 | -                            | -               | -                 | -               | -                          | (10,560)                            | 10,560      | -                     |       |
| <b>Transactions with owners, recorded directly in equity</b>                                                                      |               |                                   |                              |                 |                   |                 |                            |                                     |             |                       |       |
| Final cash dividend at Rs. 4.0 per share - December 31, 2018                                                                      | -             | -                                 | -                            | -               | -                 | -               | -                          | -                                   | (4,740,240) | (4,740,240)           |       |
| Interim cash dividend at Rs. 4.0 per share - March 31, 2019                                                                       | -             | -                                 | -                            | -               | -                 | -               | -                          | -                                   | (4,740,240) | (4,740,240)           |       |
| Interim cash dividend at Rs. 4.0 per share - June 30, 2019                                                                        | -             | -                                 | -                            | -               | -                 | -               | -                          | -                                   | (4,740,240) | (4,740,240)           |       |
| Interim cash dividend at Rs. 4.0 per share - September 30, 2019                                                                   | -             | -                                 | -                            | -               | -                 | -               | -                          | -                                   | (4,740,240) | (4,740,240)           |       |
| Balance as at December 31, 2019                                                                                                   | 11,850,600    | 23,751,114                        | 908,317                      | 2,675,131       | 31,656,691        | 18,600,000      | 4,217,747                  | 19,477,694                          | 55,777,489  | 168,914,783           |       |
| <b>Total comprehensive income for the year ended December 31, 2020</b>                                                            |               |                                   |                              |                 |                   |                 |                            |                                     |             |                       |       |
| Profit after taxation for the year ended December 31, 2020                                                                        | -             | -                                 | -                            | 201,352         | -                 | -               | 4,021,886                  | 119,544                             | 29,037,301  | 29,037,301            |       |
| Other comprehensive income - net of tax                                                                                           | -             | -                                 | -                            | -               | -                 | -               | -                          | -                                   | (342,311)   | 4,000,471             |       |
| Transfer to statutory reserve                                                                                                     | -             | -                                 | -                            | 201,352         | -                 | -               | 4,021,886                  | 119,544                             | 28,694,990  | 33,037,772            |       |
| Transfer in respect of incremental depreciation from surplus on revaluation of fixed assets to unappropriated profit - net of tax | -             | -                                 | -                            | -               | 2,903,730         | -               | -                          | -                                   | (2,903,730) | -                     |       |
| Surplus realized on disposal of revalued fixed assets - net of tax                                                                | -             | -                                 | -                            | -               | -                 | -               | -                          | (89,135)                            | 89,135      | -                     |       |
| Surplus realized on disposal of revalued non-banking assets - net of tax                                                          | -             | -                                 | -                            | -               | -                 | -               | -                          | (22,544)                            | 22,544      | -                     |       |
| <b>Transactions with owners, recorded directly in equity</b>                                                                      |               |                                   |                              |                 |                   |                 |                            |                                     |             |                       |       |
| Final cash dividend at Rs. 5.0 per share - December 31, 2019                                                                      | -             | -                                 | -                            | -               | -                 | -               | -                          | (4,774)                             | 4,774       | -                     |       |
| Interim cash dividend at Rs. 5.0 per share - March 31, 2020                                                                       | -             | -                                 | -                            | -               | -                 | -               | -                          | -                                   | (5,925,300) | (5,925,300)           |       |
| Balance as at December 31, 2020                                                                                                   | 11,850,600    | 23,751,114                        | 908,317                      | 2,876,483       | 34,560,421        | 18,600,000      | 8,239,633                  | 19,480,785                          | 69,834,602  | 190,101,955           |       |

For details of dividend declaration and appropriations, please refer note 46 to these unconsolidated financial statements.

For details of reserves, please refer note 22 to these unconsolidated financial statements.

The annexed notes 1 to 48 and annexures I to II form an integral part of these unconsolidated financial statements.

  
**Imran Maqbool**  
 President/Chief Executive

  
**S.M. Muneeb**  
 Director

  
**Mian Umer Mansha**  
 Director

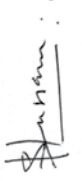  
**Shahzad Hussain**  
 Director

# Unconsolidated Cash Flow Statement

For the year ended December 31, 2020

|                                                                              | Note | 2020<br>(Rupees in '000) | 2019<br>(Rupees in '000) |
|------------------------------------------------------------------------------|------|--------------------------|--------------------------|
| <b>CASH FLOW FROM OPERATING ACTIVITIES</b>                                   |      |                          |                          |
| Profit before taxation                                                       |      | 48,248,955               | 40,102,312               |
| Less: Dividend income                                                        |      | (1,209,753)              | (1,377,173)              |
|                                                                              |      | 47,039,202               | 38,725,139               |
| Adjustments:                                                                 |      |                          |                          |
| Depreciation on fixed assets                                                 | 12.2 | 2,005,061                | 1,916,646                |
| Depreciation on right of use assets                                          | 31   | 1,216,784                | 1,161,795                |
| Depreciation on non-banking assets acquired in satisfaction of claims        | 31   | 30,049                   | 45,456                   |
| Amortization                                                                 | 13   | 318,024                  | 301,022                  |
| Provisions / (reversals) and write offs - net                                | 33   | 7,313,166                | 2,483,534                |
| Workers welfare fund                                                         |      | 964,978                  | 802,046                  |
| Gain on sale of non-banking assets acquired in satisfaction of claims        | 30   | (3,976)                  | (111,948)                |
| Charge / (reversal) for defined benefit plan                                 | 31.1 | 74,827                   | (101,509)                |
| Gain on sale of fixed assets                                                 | 30   | (72,601)                 | (90,158)                 |
| Loss on termination of lease liability against right of use assets           | 30   | 15,637                   | -                        |
| Unrealized loss on revaluation of investments classified as held for trading | 29   | 224                      | 4,176                    |
| Interest expensed on lease liability against right-of-use assets             | 27   | 1,106,824                | 1,132,099                |
| Loss on amalgamation of a subsidiary                                         |      | -                        | 7,512                    |
| Gain on sale of shares in a subsidiary                                       | 29.1 | (72,194)                 | -                        |
|                                                                              |      | 12,896,803               | 7,550,671                |
|                                                                              |      | 59,936,005               | 46,275,810               |
| Decrease / (increase) in operating assets                                    |      |                          |                          |
| Lendings to financial institutions                                           |      | (16,049,395)             | 34,016,183               |
| Held-for-trading securities                                                  |      | 8,179,715                | (128,778)                |
| Advances                                                                     |      | 26,262,334               | 7,224,925                |
| Others assets (excluding advance taxation)                                   |      | 9,710,281                | (16,297,896)             |
|                                                                              |      | 28,102,935               | 24,814,434               |
| (Decrease) / increase in operating liabilities                               |      |                          |                          |
| Bills Payable                                                                |      | 12,158,994               | (3,877,582)              |
| Borrowings from financial institutions                                       |      | 75,447,775               | (125,990,277)            |
| Deposits                                                                     |      | 144,739,045              | 95,725,644               |
| Other liabilities (excluding current taxation)                               |      | (18,195,415)             | 13,859,980               |
|                                                                              |      | 214,150,399              | (20,282,235)             |
| Defined benefits paid                                                        |      | (302,940)                | (309,074)                |
| Income tax paid                                                              |      | (16,078,289)             | (2,306,594)              |
| Net cash flow from operating activities                                      |      | 285,808,110              | 48,192,341               |
| <b>CASH FLOW FROM INVESTING ACTIVITIES</b>                                   |      |                          |                          |
| Net investments in available-for-sale securities                             |      | (286,438,369)            | 8,627,647                |
| Net investments in held-to-maturity securities                               |      | 17,363,419               | 309,822                  |
| Investment in a subsidiary                                                   |      | -                        | (350,000)                |
| Dividends received                                                           |      | 1,179,851                | 1,394,813                |
| Investments in fixed assets                                                  |      | (2,791,537)              | (4,395,890)              |
| Investments in Intangible assets                                             |      | (298,880)                | (625,800)                |
| Proceeds from sale of fixed assets                                           |      | 186,909                  | 158,186                  |
| Proceeds from sale of non-banking assets acquired in satisfaction of claims  |      | 39,000                   | 540,000                  |
| Investments in non-banking assets acquired in satisfaction of claims         |      | -                        | (64,445)                 |
| Net cash inflow from amalgamation of a subsidiary                            |      | -                        | 40,968                   |
| Proceeds from divestment in a subsidiary                                     |      | 99,694                   | -                        |
| Effect of translation of net investment in foreign branches                  |      | 201,352                  | 1,045,588                |
| Net cash flow (used in) / generated from investing activities                |      | (270,458,561)            | 6,680,889                |
| <b>CASH FLOW FROM FINANCING ACTIVITIES</b>                                   |      |                          |                          |
| Payments of Subordinated debt                                                |      | -                        | (3,891,019)              |
| Dividend paid                                                                |      | (11,750,637)             | (18,838,387)             |
| Payment of lease liability against right-of-use-assets                       |      | (1,682,647)              | (1,427,643)              |
| Net cash flow used in financing activities                                   |      | (13,433,284)             | (24,157,049)             |
| Effects of exchange rate changes on cash and cash equivalents                |      | 1,595,436                | 3,553,077                |
| <b>Increase in cash and cash equivalents</b>                                 |      | 3,511,701                | 34,269,258               |
| Cash and cash equivalents at beginning of the year                           |      | 142,302,153              | 109,628,331              |
| <b>Cash and cash equivalents at end of the year</b>                          | 36   | 145,813,854              | 143,897,589              |

The annexed notes 1 to 48 and annexures I to II form an integral part of these unconsolidated financial statements.



**Imran Maqbool**  
President/Chief Executive



**Hammad Khalid**  
Chief Financial Officer



**S.M. Muneer**  
Director



**Mian Umer Mansha**  
Director

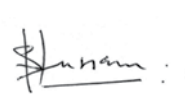

**Shahzad Hussain**  
Director

# Notes To The Unconsolidated Financial Statements

For the year ended December 31, 2020

## 1. STATUS AND NATURE OF BUSINESS

MCB Bank Limited (the 'Bank') is a banking company incorporated in Pakistan and is engaged in commercial banking and related services. The Bank's ordinary shares are listed on the Pakistan stock exchange. The Bank's Registered Office and Principal Office are situated at MCB - 15 Main Gulberg, Lahore. The Bank operates 1,418 branches (2019: 1,399 branches) within Pakistan and 11 branches (2019: 11 branches) outside Pakistan (including the Karachi Export Processing Zone branch).

## 2. BASIS OF PRESENTATION

**2.1** These unconsolidated financial statements represent separate financial statements of MCB Bank Limited. The consolidated financial statements of the Group are being issued separately.

**2.2** In accordance with the directives of the Federal Government regarding the shifting of the banking system to Islamic modes, the State Bank of Pakistan has issued various circulars from time to time. Permissible forms of trade-related modes of financing include purchase of goods by banks from their customers and immediate resale to them at appropriate profit in price on deferred payment basis. The purchases and sales arising under these arrangements are not reflected in these unconsolidated financial statements as such but are restricted to the amount of facility actually utilized and the appropriate portion of profit thereon.

**2.3** The unconsolidated financial statements are presented in Pak Rupees, which is the Bank's functional and presentation currency. The amounts are rounded off to the nearest thousand.

## 3. STATEMENT OF COMPLIANCE

**3.1** These unconsolidated financial statements have been prepared in accordance with accounting and reporting standards as applicable in Pakistan. The accounting and reporting standards comprise of:

- International Financial Reporting Standards (IFRS) issued by the International Accounting Standards Board (IASB) as are notified under the Companies Act, 2017;
- Islamic Financial Accounting Standards (IFAS) issued by the Institute of Chartered Accountants of Pakistan as are notified under the Companies Act, 2017;
- Provisions of and directives issued under the Banking Companies Ordinance, 1962, the Companies Act, 2017; and
- Directives issued by the SBP and the Securities and Exchange Commission of Pakistan (SECP).

Wherever the requirements of the Banking Companies Ordinance, 1962, Companies Act, 2017 or the directives issued by the SBP and the SECP differ with the requirements of IFRS or IFAS, requirements of the Banking Companies Ordinance, 1962, the Companies Act, 2017 and the said directives shall prevail.

The State Bank of Pakistan has deferred the applicability of International Financial Reporting Standard 9, 'Financial Instruments' through BPRD Circular No. 04 of 2019 dated October 23, 2019 and International Accounting Standards 40, 'Investment Property' for Banking Companies through BSD Circular No. 10 dated August 26, 2002. The Securities and Exchange Commission of Pakistan (SECP) has deferred applicability of IFRS-7 "Financial Instruments: Disclosures" on banks through S.R.O 411(1)/2008 dated April 28, 2008. Accordingly, the requirements of these standards have not been considered in the preparation of these unconsolidated financial statements. However, investments have been classified and valued in accordance with the requirements prescribed by the State Bank of Pakistan through various circulars.

IFRS10 Consolidated Financial Statements was made applicable from period beginning on or after January 01, 2015 vide S.R.O 633(I)/2014 dated July 10, 2014 by SECP. However, SECP has directed through S.R.O 56(I) /2016 dated January 28, 2016, that the requirements of consolidation under section 237 of the repealed Companies Ordinance 1984 (Section 228 of Companies Act 2017) and

# Notes To The Unconsolidated Financial Statements

For the year ended December 31, 2020

IFRS-10 “Consolidated Financial Statements” is not applicable in case of investment by companies in mutual funds established under Trust structure. Accordingly, the requirements of these standards have not been considered in the preparation of these unconsolidated financial statements.

### 3.2 Standards, interpretations and amendments to published approved accounting standards that are effective in the current year

There are certain other new standards and interpretations of and amendments to existing accounting standards that have become applicable to the Bank for accounting periods beginning on or after January 1, 2020. These are considered either to not be relevant or not to have any significant impact on the Bank’s unconsolidated financial statements.

### 3.3 Standards, interpretations and amendments to published approved accounting standards that are not yet effective

The following other standards, amendments and interpretations of approved accounting standards are effective for accounting periods beginning on or after January 1, 2021:

|                                                                               | <b>Effective date (annual periods beginning on or after)</b> |
|-------------------------------------------------------------------------------|--------------------------------------------------------------|
| IAS 1, Presentation of Financial Statements (Amendments)                      | January 1, 2022                                              |
| IAS 16, Property, plant and equipment (Amendments)                            | January 1, 2022                                              |
| IAS 37, Provisions, Contingent Liabilities and Contingent Assets (Amendments) | January 1, 2022                                              |

The SECP, through SRO 229(I)/2019 dated February 14, 2019, has notified that IFRS 9, Financial Instruments, is applicable for accounting periods ending on or after June 30, 2019. However, as per BPRD Circular No. 04 of 2019 dated October 23, 2019 of SBP, effective date of IFRS 9 implementation is January 01, 2021. The requirements of this standard are incorporated in these unconsolidated financial statements for the jurisdictions where IFRS 9 has been adopted.

IFRS 9, Financial Instruments: Classification and Measurement, addresses recognition, classification, measurement and derecognition of financial assets and financial liabilities. The standard has also introduced a new impairment model for financial assets which requires recognition of impairment charge based on an ‘expected credit losses’ (ECL) approach rather than the ‘incurred credit losses’ approach as currently followed. The ECL approach has an impact on all assets of the Bank which are exposed to credit risk. The impact of the application of IFRS 9 in Pakistan on the Bank’s financial statements is being assessed and SBP’s implementation guidelines are awaited.

There are other new and amended standards and interpretations that are mandatory for the Bank’s accounting periods beginning on or after January 1, 2021 but are considered not to be relevant or do not have any significant effect on the Bank’s operations and are therefore not detailed in these unconsolidated financial statements.

## 4. BASIS OF MEASUREMENT

4.1 These unconsolidated financial statements have been prepared under the historical cost convention except that certain classes of fixed assets and non-banking assets acquired in satisfaction of claims are stated at revalued amounts and certain investments and derivative financial instruments have been marked to market and are carried at fair value. In addition, obligations in respect of staff retirement benefits are carried at present value.

### 4.2 Critical accounting estimates and judgments

The preparation of unconsolidated financial statements in conformity with the approved accounting standards requires the use of certain critical accounting estimates. It also requires the management

# Notes To The Unconsolidated Financial Statements

For the year ended December 31, 2020

to exercise its judgment in the process of applying the Bank's accounting policies. Estimates and judgments are continually evaluated and are based on historical experiences, including expectations of future events that are believed to be reasonable under the circumstances. Revisions to accounting estimates are recognized in the period in which the estimates are revised if the revision affects only that period, or in the period of revision and future periods if the revision affects both current and future periods. The areas where various assumptions and estimates are significant to the Bank's financial statements or where judgment was exercised in the application of accounting policies are as follows:

## a) Classification of investments

In classifying investments, the Bank follows the guidance provided in SBP circulars:

- Investments classified as 'held for trading', are securities which are acquired with an intention to trade by taking advantage of short term market / interest rate movements and are to be sold within 90 days of acquisition.
- Investments classified as 'held to maturity' are non-derivative financial assets with fixed or determinable payments and fixed maturity. In making this judgment, the Bank evaluates its intention and ability to hold such investment to maturity.
- The investments other than those in subsidiaries and associates which are not classified as 'held for trading' or 'held to maturity' are classified as 'available for sale'.

## b) Provision against advances

The Bank reviews its loan portfolio to assess the amount of non-performing advances and provision required there against on regular basis. While assessing this requirement, various factors including the delinquency in the account, financial position of the borrowers and the requirements of the Prudential Regulations are considered.

The amount of general provision is determined in accordance with the relevant regulations and management's judgment as explained in note 11.4.4.

## c) Impairment of 'available for sale' equity investments

The Bank determines that 'available for sale' equity investments are impaired when there has been a significant or prolonged decline in the fair value below its cost. The determination of what is significant or prolonged requires judgment. In making this judgment, the Bank evaluates among other factors, the normal volatility in share price. In addition, the impairment may be appropriate when there is an evidence of deterioration in the financial health of the investee and sector performance, changes in technology and operational/financial cash flows.

## d) Taxation

In making the estimates for income taxes currently payable by the Bank, the management considers the current income tax laws and the decisions of appellate authorities on certain issues in the past.

## e) Fair value of derivatives

The fair values of derivatives which are not quoted in active markets are determined by using valuation techniques. The valuation techniques take into account the relevant underlying parameters including foreign currency involved, interest rates, yield curves, volatilities, contracts duration etc.

## f) Depreciation, amortization and revaluation of operating fixed assets

The management reviews the useful lives and residual values of assets annually by considering expected pattern of economic benefit that the management expects to drive from the item and the maximum period up to which such benefits are expected to be available. Any change in estimates in future years might affect the carrying amounts of the respective items of assets with a corresponding effect on the depreciation charge and impairment. Such change is accounted for as change in accounting estimates in accordance with International Accounting Standard (IAS) 8 "Accounting

# Notes To The Unconsolidated Financial Statements

For the year ended December 31, 2020

Policies, Changes in Accounting Estimates and Errors". Further, the Bank estimates the revalued amount of land and buildings on a regular basis. The estimates are based on valuations carried out by independent professional valuers under the market conditions.

**g) Staff retirement benefits**

Certain actuarial assumptions have been adopted as disclosed in note 38 of these unconsolidated financial statements for the actuarial valuation of staff retirement benefit plans. Actuarial assumptions are entity's best estimates of the variables that will determine the ultimate cost of providing post employment benefits. Changes in these assumptions in future years may affect the liability / asset under these plans in those years.

**h) Lease term**

The Bank applies judgement to determine the lease term for some lease contracts in which it is a lessee that include renewal options. The assessment of whether the Bank is reasonably certain to exercise such options impacts the lease term, which significantly affects the amount of lease liabilities and right-of-use assets recognized.

## 5. FINANCIAL RISK MANAGEMENT

These risk management policies continue to remain robust and the Bank is reviewing its portfolio regularly and conducts rapid portfolio reviews in line with emerging risks.

### Impact of COVID-19 on the Financial Statements

The COVID - 19 pandemic has taken a toll on all economies and emerged as a contagion risk around the globe, including Pakistan. To reduce the impact on businesses and economies in general, regulators / governments across the globe have introduced a host of measures on both the fiscal and economic fronts.

The State Bank of Pakistan (SBP) has also responded to the crisis by cutting the Policy Rate by 625 basis points during the period to 7% by June 2020. Other regulatory measures to provide an impetus to economic activity include the following:

- Reduction in the capital conservation buffer by 100 basis points to 1.5%;
- Increasing the regulatory limit on extension of credit to SMEs to Rs 180 million;
- Relaxing the debt burden ratio for consumer loans from 50% to 60%;
- Allowing banks to defer borrowers' principal loan payments by one year and / or restructure / reschedule loans for borrowers who require relief of principal repayment exceeding one year and / or mark-up with no reflection on credit history; and
- Introduction of refinancing schemes for payment of wages and salaries.

COVID 19 has impacted the banks in Pakistan from various facets which include muted credit risk increase, reduced fee income due to slowdown in economic activity, branch closures and cyber security threat management.

The potential impact of the economic stress posed by the COVID-19 outbreak is difficult to predict, as many of Bank's borrowers have availed the SBP enabled deferment/restructuring & rescheduling relief. Hence, the management has exercised prudence and booked General Provision of Rs. 4.0 billion during the year ended December 31, 2020.

Detailed disclosure on financial risk management has been reported in Note 45 to the financial statements.

## 6. SUMMARY OF SIGNIFICANT ACCOUNTING POLICIES

The accounting policies adopted in the preparation of these unconsolidated financial statements are consistent with those of the previous financial year:



# Notes To The Unconsolidated Financial Statements

For the year ended December 31, 2020

## 6.1 IFRS 16 - Lease Liability & Right of Use Assets

The lease liability is initially measured at the present value of lease payments to be made over the term of the lease, discounted using the Bank's incremental borrowing rate. The lease liability is subsequently measured at amortized cost using the effective interest rate method. The carrying amount is remeasured/adjusted if there are changes in the future cash flows or the lease term.

The right-of-use asset is initially measured at cost, which comprises the initial amount of the lease liability, adjusted for, as applicable, any lease payments made at or before the commencement date. On subsequent measurement, right-of-use assets are stated at cost less any accumulated depreciation / accumulated impairment losses and are adjusted for any remeasurement of the lease liability.

Right-of-use assets are depreciated on a straight line basis over the lease term as this method closely reflects the expected pattern of consumption of future economic benefits. Carrying amount of the lease liability is derecognised upon termination of the lease contract with corresponding adjustment to right-of-use asset. Gain or loss on termination of lease contract is recognised in the profit and loss account.

The Bank has elected not to recognize a right-of-use asset and the corresponding lease liability for short-term leases with terms of 12 months or less and leases of low-value assets. Payments associated with these leases are recognized as an expense in the profit or loss account on a straight-line basis.

## 6.2 Investments

The Bank classifies its investments as follows:

### a) Held for trading

These are securities, which are either acquired for generating profit from short-term fluctuations in market prices, interest rate movements, dealers margin or are securities included in a portfolio in which a pattern of short-term profit taking exists.

### b) Held to maturity

These are securities with fixed or determinable payments and fixed maturity in respect of which the Bank has the positive intent and ability to hold to maturity.

### c) Available for sale

These are investments, other than those in subsidiaries and associates, that do not fall under the 'held for trading' or 'held to maturity' categories.

Investments are initially recognized at cost which in case of investments other than 'held for trading' include transaction costs associated with the investment. Transaction costs on investments held for trading are expensed in the profit and loss account.

All purchases and sales of investments that require delivery within the time frame established by regulation or market convention are recognized at the trade date. Trade date is the date on which the Bank commits to purchase or sell the investment.

In accordance with the requirements of the State Bank of Pakistan, quoted securities, other than those classified as 'held to maturity', investments in subsidiaries and investments in associates are subsequently re-measured to market value. Surplus / deficit arising on revaluation of quoted securities which are classified as 'available for sale', is taken to surplus / deficit on revaluation of investments through statement of comprehensive income in equity till disposal at which time it is recorded in profit and loss account. Surplus / deficit arising on revaluation of quoted securities which are classified as 'held for trading', is taken to the profit and loss account, currently.

# Notes To The Unconsolidated Financial Statements

For the year ended December 31, 2020

Unquoted equity securities (excluding investments in subsidiaries and associates) are valued at the lower of cost and break-up value. Break-up value of equity securities is calculated with reference to the net assets of the investee company as per the latest available audited financial statements. Investments classified as 'held to maturity' are carried at amortized cost less accumulated impairment losses, if any.

Associates are all entities over which the Bank has significant influence but not control. Subsidiaries are all entities over which the Bank has the power to govern the financial and operating policies accompanying a shareholding of more than one half of the voting rights. Investments in subsidiaries and investments in associates are carried at cost less accumulated impairment losses, if any.

Provision for impairment in the values of securities (except debentures, participation term certificates and term finance certificates) is made currently. Impairment of 'available for sale' equity investments is discussed in 4.2(c). Provisions for impairment in value of debentures, participation term certificates and term finance certificates are made as per the requirements of the Prudential Regulations issued by the State Bank of Pakistan.

Impairment against investment in subsidiaries and associates is assessed as per the requirements of IAS 36.

## 6.3 Sale and repurchase agreements

Securities sold subject to a repurchase agreement (repo) are retained in these unconsolidated financial statements as investments and the counter party liability is included in borrowings. Securities purchased under an agreement to resell (reverse repo) are not recognized in these unconsolidated financial statements as investments and the amount extended to the counter party is included in lendings to financial institutions. The difference between the purchase / sale and re-sale / re-purchase price is recognized as mark-up income / expense on a time proportion basis, as the case may be.

## 6.4 Advances

Advances are stated net of specific and general provisions. Specific provision is determined on the basis of the Prudential Regulations and other directives issued by the State Bank of Pakistan (SBP) and charged to the profit and loss account. Provisions are held against identified as well as unidentified losses. Provisions against unidentified losses include general provision against Consumer and Small Enterprise (SEs) loans made in accordance with the requirements of the Prudential Regulations issued by SBP and provision based on historical loss experience on advances. General provisions pertaining to overseas advances are made in accordance with the requirements of the regulatory authorities of the respective countries. Advances are written off when there is no realistic prospect of recovery.

Leases where the Bank transfers substantially all the risks and rewards incidental to ownership of an asset to the lessee are classified as finance leases. A receivable is recognized at an amount equal to the present value of the lease payments including any guaranteed residual value. Finance lease receivables are included in advances to the customers.

## 6.5 Fixed assets and depreciation

Fixed assets other than land and buildings are stated at cost less accumulated depreciation and accumulated impairment losses, if any. Buildings are carried at revalued amount less any accumulated depreciation and subsequent impairment losses, if any. Land is carried at revalued amount less any subsequent impairment losses, if any. Cost of property and equipment of foreign operations includes exchange differences arising on currency translation at year-end rates.

Capital work-in-progress is stated at cost less accumulated impairment losses, if any. These are transferred to specific assets as and when assets become available for use.

Depreciation on all fixed assets (excluding land) is charged using the straight line method in accordance with the rates specified in note 12.2 to these unconsolidated financial statements and after taking into account residual value, if any. The residual values, useful lives and depreciation methods are reviewed and adjusted, if appropriate, at each balance sheet date.

# Notes To The Unconsolidated Financial Statements

For the year ended December 31, 2020

Depreciation on additions is charged from the month the assets are available for use while no depreciation is charged in the month in which the assets are disposed off.

Land and buildings are revalued by independent, professionally qualified valuers with sufficient regularity to ensure that their net carrying amount does not differ materially from their fair value. An increase arising on revaluation is credited to the surplus on revaluation of fixed assets account. A decrease arising on revaluation of fixed assets is adjusted against the surplus of that asset or, if no surplus exists, is charged to the profit and loss account as an impairment of the asset. A surplus arising subsequently on an impaired asset is reversed through the profit and loss account up to the extent of the original impairment.

Surplus on revaluation of fixed assets (net of associated deferred tax) to the extent of the incremental depreciation charged on the related assets is transferred to unappropriated profit.

Gains / losses on sale of property and equipment are credited / charged to the profit and loss account currently, except that the related surplus on revaluation of land and buildings (net of deferred taxation) is transferred directly to unappropriated profit.

Subsequent costs are included in the asset's carrying amount or are recognized as a separate asset, as appropriate, only when it is probable that future economic benefits associated with the item will flow to the Bank and the cost of the item can be measured reliably. All other repairs and maintenance are charged to the profit and loss account.

## 6.5.1 Intangible assets

Intangible assets are stated at cost less accumulated amortization and accumulated impairment losses, if any. Intangible assets are amortized from the month when these assets are available for use, using the straight line method, whereby the cost of the intangible assets are amortized over its estimated useful lives over which economic benefits are expected to flow to the Bank. The useful lives are reviewed and adjusted, if appropriate, at each balance sheet date.

## 6.6 Impairment

The carrying amount of assets are reviewed at each balance sheet date for impairment whenever events or changes in circumstances indicate that the carrying amounts of the assets may not be recoverable. If such indication exists and where the carrying value exceeds the estimated recoverable amount, assets are written down to their recoverable amounts. The resulting impairment loss is taken to the profit and loss account except for impairment loss on revalued assets, which is adjusted against the related revaluation surplus to the extent that the impairment loss does not exceed the surplus on revaluation of that asset.

## 6.7 Staff retirement benefits

The Bank operates the following staff retirement benefits for its employees:

- a) For clerical / non-clerical staff who did not opt for the new scheme, the Bank operates the following:
  - an approved contributory provident fund;
  - an approved gratuity scheme; and
  - a contributory benevolent scheme
- b) For clerical / non-clerical staff who joined the Bank after the introduction of the new scheme and for others who opted for the new scheme introduced in 1975, the Bank operates the following:
  - an approved non-contributory provident fund introduced in lieu of the contributory provident fund;
  - an approved pension fund; and
  - contributory benevolent scheme

## Notes To The Unconsolidated Financial Statements

For the year ended December 31, 2020

- c) For officers who joined the Bank after the introduction of the new scheme and for others who opted for the new scheme introduced in 1977, the Bank operates the following:
- an approved non-contributory provident fund introduced in lieu of the contributory provident fund;
  - an approved pension fund, and
  - contributory benevolent fund.

However, the management has replaced the pension benefits for employees in the officer category with a contributory provident fund for services rendered after December 31, 2003.

- d) For executives and officers who joined the Bank on or after January 01, 2000, the Bank operates an approved contributory provident fund.

- e) Post retirement medical benefits to entitled employees.

Annual contributions towards the defined benefit plans and schemes are made on the basis of actuarial advice using the Projected Unit Credit Method. The above benefits are payable to staff at the time of separation from the Bank's services subject to the completion of qualifying period of service. Actuarial gains / losses arising from experience adjustments and changes in actuarial assumptions are recognized in other Comprehensive Income in the period of occurrence.

Past service cost is the change in the present value of the defined benefit obligation resulting from a plan amendment or curtailment. The Bank recognizes past service cost as an expense at the earlier of the following dates:

- (i) when the plan amendment or curtailment occurs; and
- (ii) and when the Bank recognizes related restructuring costs or termination benefits.

### Employees' compensated absences

Liability in respect of employees' compensated absences is accounted for in the year in which these are earned on the basis of actuarial valuation carried out using the Projected Unit Credit Method. Actuarial gains / losses arising from experience adjustments and changes in actuarial assumptions are recognized in Profit and Loss account in the period of occurrence.

## 6.8 Taxation

### Current

Provision for current taxation is based on taxable income at the current rates of taxation after taking into consideration available tax credits and rebates. The charge for current tax also includes adjustments where considered necessary, relating to prior years which arise from assessments framed / finalized during the year.

### Deferred

Deferred tax is recognized using the balance sheet liability method on all temporary differences between the amounts attributed to assets and liabilities for financial reporting purposes and amounts used for taxation purposes. The Bank records deferred tax assets / liabilities using the tax rates, enacted or substantively enacted by the balance sheet date expected to be applicable at the time of its reversal. Deferred tax asset is recognized only to the extent that it is probable that future taxable profits will be available against which the asset can be utilized. Deferred tax assets are reduced to the extent that it is no longer probable that the related tax benefit will be realized. The Bank also recognizes deferred tax asset / liability on deficit / surplus on revaluation of securities and deferred tax liability on surplus on revaluation of fixed assets which is adjusted against the related deficit / surplus in accordance with the requirements of International Accounting Standard (IAS) 12, 'Income Taxes'.

# Notes To The Unconsolidated Financial Statements

For the year ended December 31, 2020

Deferred tax liability is not recognized in respect of taxable temporary differences associated with exchange translation reserves of foreign operations, where the timing of the reversal of the temporary difference can be controlled and it is probable that the temporary differences will not reverse in the foreseeable future.

## 6.9 Provisions

Provisions are recognized when the Bank has a legal or constructive obligation as a result of past events and it is probable that an outflow of resources will be required to settle the obligation and a reliable estimate of the amount can be made. Provisions are reviewed at each balance sheet date and are adjusted to reflect the current best estimates.

## 6.10 Foreign currencies

### 6.10.1 Foreign currency transactions

Transactions in foreign currencies other than the results of foreign operations discussed in note 6.10.2 are translated to Rupees at the foreign exchange rates prevailing on the transaction date. Monetary assets and liabilities in foreign currencies are expressed in Rupee terms at the rates of exchange prevailing at the balance sheet date. Forward foreign exchange contracts are valued at the rates applicable to their respective maturities.

### 6.10.2 Foreign operations

The assets and liabilities of foreign branches are translated to Rupees at exchange rates prevailing at the statement of financial position date. The results of foreign operations are translated to Rupees at the average rate of exchange for the year.

### 6.10.3 Translation gains and losses

Translation gains and losses are included in the profit and loss account, except those arising on the translation of the Bank's net investment in foreign branches, which are taken to the capital reserve (exchange translation reserve) until the disposal of the net investment, at which time these are recognized in the profit and loss account.

### 6.10.4 Commitments

Commitments for outstanding forward foreign exchange contracts are disclosed in these unconsolidated financial statements at committed amounts. Contingent liabilities / commitments for letters of credit and letters of guarantee denominated in foreign currencies are expressed in Rupee terms at the rates of exchange prevailing at the statement of financial position date.

## 6.11 Acceptances

Acceptances comprise undertakings by the Bank to pay bills of exchange drawn on customers. The Bank expects most acceptances to be simultaneously settled with the reimbursement from the customers.

## 6.12 Revenue recognition

- Mark-up / interest on advances and returns on investments are recognized on a time proportion basis using the effective interest method except that mark-up / interest on non-performing advances and investments is recognized on a receipt basis, in accordance with the requirements of the Prudential Regulations issued by the State Bank of Pakistan (SBP) or as permitted by the regulations of the overseas regulatory authorities of countries where the branches operate. Where debt securities are purchased at premium or discount, such premium / discount is amortized through the profit and loss account over the remaining period of maturity.
- Financing method is used in accounting for income from lease financing. Under this method, the unearned lease income (excess of the sum of total lease rentals and estimated residual value over the cost of leased assets) is deferred and taken to income over the term of the lease period so as to produce a constant periodic rate of return on the outstanding net investment in lease. Gains / losses on termination of lease contracts are recognized as income when these are realized.

# Notes To The Unconsolidated Financial Statements

For the year ended December 31, 2020

- Commission income is recognized on a time proportion basis.
- Dividend income is recognized when the Bank's right to receive dividend is established.
- Gain / loss on sale of investments is credited / charged to profit and loss account currently.

## 6.13 Assets acquired in satisfaction of claims

Non-banking assets (NBA) acquired in satisfaction of claims are carried at revalued amounts less accumulated depreciation and impairment loss. These assets are revalued by professionally qualified valuers with sufficient regularity to ensure that their net carrying value does not differ materially from their fair value. A surplus arising on revaluation of property is credited to the 'surplus on revaluation of non banking assets' account through statement of comprehensive income in equity and any deficit arising on revaluation is taken to profit and loss account directly. Legal fees, transfer costs and direct costs of acquiring title to property are charged to profit and loss account and not capitalized.

## 6.14 Cash and cash equivalents

Cash and cash equivalents include cash and balances with treasury banks and balances with other banks (net of overdrawn Nostro balances) in current and deposit accounts.

## 6.15 Financial instruments

### 6.15.1 Financial assets and financial liabilities

Financial instruments carried on the statement of financial position include cash and balances with treasury banks, balances with other banks, lendings to financial institutions, investments, advances, other assets, bills payable, borrowings, deposits and other liabilities. The particular recognition methods adopted for significant financial assets and financial liabilities are disclosed in the individual policy statements associated with these assets and liabilities.

### 6.15.2 Derivative financial instruments

Derivative financial instruments are initially recognized at fair value on the date on which a derivative contract is entered into and are subsequently remeasured at their fair value using valuation techniques. All the derivative financial instruments are carried as an asset when the fair value is positive and as a liability when the fair value is negative. Any change in the fair value of derivative financial instruments is taken to the profit and loss account currently.

### 6.15.3 Off setting

Financial assets and financial liabilities are off set and the net amount is reported in these unconsolidated financial statements when there is a legally enforceable right to set off and the Bank intends either to settle on a net basis, or to realize the assets and settle the liabilities, simultaneously.

## 6.16 Borrowings / deposits

Borrowings / deposits are recorded at the proceeds received. The cost of borrowings / deposits is recognized as an expense in the period in which this is incurred.

## 6.17 Segment reporting

A segment is a distinguishable component of the Bank that is engaged in providing products or services (business segment) or in providing products or services within a particular economic environment (geographical segment), which is subject to risks and rewards that are different from those of other segments. The Bank's primary format of reporting is based on business segments.

### 6.17.1 Business segments

#### Retail banking

This includes retail lending and deposits, banking services, cards and branchless banking.

# Notes To The Unconsolidated Financial Statements

For the year ended December 31, 2020

## Corporate banking

This comprises of loans, deposits, project financing, trade financing, investment banking and other banking activities / with Bank's corporate and public sector customers.

## Consumer Banking

This segment primarily constitutes consumer financing activities with individual customers of the Bank. Product suite offered to these customers include credit cards, auto loans, housing finance and personal loans.

## Treasury

This includes fixed income, equity, foreign exchange, credit, funding, own position securities, lendings and borrowings and derivatives for hedging and market making.

## International Banking

This comprises of loans, deposits, project financing, trade financing, investment banking and other banking activities by Bank's overseas operations.

## Others

This includes the head office related activities and other functions which cannot be classified in any of the above segments.

### 6.17.2 Geographical segments

The Bank operates in three geographic regions being:

- Pakistan
- South Asia
- Middle East

### 6.18 Dividend distribution and appropriation

Dividends (including bonus dividend) and other appropriations (except appropriations which are required by law) are recognized in the period in which these are approved.

### 6.19 Business combination

Business combinations other than under common control transaction are accounted for by applying the acquisition method. The cost of acquisition is measured as the fair value of assets given, equity instruments issued and the liabilities incurred or assumed at the date of acquisition. The consideration transferred includes the fair value of any asset or liability resulting from a contingent consideration arrangement, if any. Acquisition-related costs are expensed as incurred. Identifiable assets acquired and liabilities and contingent liabilities assumed in a business combination are measured initially at their fair values at the acquisition date. The excess of the consideration transferred over the fair value of the identifiable net assets acquired is recorded as goodwill. If this is less than the fair value of the net assets acquired in the case of a bargain purchase, the difference is recognized directly in the profit and loss account or as directed by the SBP.

### 6.20 Earnings per share

The Bank presents basic and diluted earnings per share (EPS). Basic EPS is calculated by dividing the profit or loss attributable to ordinary shareholders of the Bank by the weighted average number of ordinary shares outstanding during the year.

## Notes To The Unconsolidated Financial Statements

For the year ended December 31, 2020

|                                                 | Note | 2020<br>(Rupees in '000) | 2019        |
|-------------------------------------------------|------|--------------------------|-------------|
| <b>7. CASH AND BALANCES WITH TREASURY BANKS</b> |      |                          |             |
| In hand                                         |      |                          |             |
| Local currency                                  |      | 22,094,317               | 18,738,087  |
| Foreign currencies                              |      | 6,183,785                | 2,201,941   |
|                                                 |      | 28,278,102               | 20,940,028  |
| With State Bank of Pakistan in                  |      |                          |             |
| Local currency current account                  | 7.1  | 47,257,342               | 56,533,231  |
| Foreign currency current account                | 7.2  | 1,966,635                | 277,126     |
| Foreign currency deposit account                | 7.3  | 10,215,984               | 14,023,401  |
|                                                 |      | 59,439,961               | 70,833,758  |
| With other central banks in                     |      |                          |             |
| Foreign currency current account                | 7.4  | 11,851,311               | 16,220,148  |
| With National Bank of Pakistan in               |      |                          |             |
| Local currency current account                  |      | 21,673,576               | 24,390,028  |
| Prize bonds                                     |      | 937,889                  | 320,835     |
|                                                 |      | 122,180,839              | 132,704,797 |

**7.1** This represents current accounts maintained with the SBP under the Cash Reserve Requirement of section 22 of the Banking Companies Ordinance, 1962.

**7.2** This represents US Dollar settlement account maintained with SBP.

**7.3** This represents account maintained with the SBP to comply with the Special Cash Reserve requirement. This includes balance of Rs. 6,810.656 million (2019: Rs. 10,517.551 million) which carries interest rate of 0% (2019: 0.70%) per annum as declared by SBP.

**7.4** Foreign currency current account with other central banks are maintained to meet their minimum cash reserves and capital requirements pertaining to the foreign branches of the Bank.

|                                     | Note | 2020<br>(Rupees in '000) | 2019       |
|-------------------------------------|------|--------------------------|------------|
| <b>8. BALANCES WITH OTHER BANKS</b> |      |                          |            |
| Outside Pakistan                    |      |                          |            |
| In current account                  |      | 21,798,363               | 8,396,527  |
| In deposit account                  | 8.1  | 2,231,965                | 4,145,712  |
|                                     |      | 24,030,328               | 12,542,239 |
|                                     |      | 24,030,328               | 12,542,239 |

**8.1** Balances with other banks outside Pakistan in deposit accounts carry interest rate of 1.5% (2019: 2.60% to 8.30%) per annum.

|                                              | Note | 2020<br>(Rupees in '000) | 2019      |
|----------------------------------------------|------|--------------------------|-----------|
| <b>9. LENDINGS TO FINANCIAL INSTITUTIONS</b> |      |                          |           |
| Call / clean money lendings                  | 9.1  | 11,002,195               | 1,090,058 |
| Repurchase agreement lendings (Reverse Repo) | 9.2  | 6,137,258                | –         |
|                                              |      | 17,139,453               | 1,090,058 |



## Notes To The Unconsolidated Financial Statements

For the year ended December 31, 2020

9.1 Call money lending carries mark-up rate ranging from 0.1% to 4.55% (2019: 7.0% to 9.0%) per annum and is due to mature in January 2021.

9.2 Repurchase agreement lendings carry mark-up rate ranging from 6.4% to 7.1% per annum and is due to mature in January 2021.

|            |                               | 2020             |                   | 2019 |                  |
|------------|-------------------------------|------------------|-------------------|------|------------------|
|            |                               | (Rupees in '000) |                   |      |                  |
| <b>9.3</b> | <b>Particulars of lending</b> |                  |                   |      |                  |
|            | In local currency             |                  | 6,137,258         |      | 880,853          |
|            | In foreign currencies         |                  | 11,002,195        |      | 209,205          |
|            |                               |                  | <b>17,139,453</b> |      | <b>1,090,058</b> |

  

|            |                                                                                 | 2020             |                             |           | 2019         |                             |       |
|------------|---------------------------------------------------------------------------------|------------------|-----------------------------|-----------|--------------|-----------------------------|-------|
|            |                                                                                 | Held by Bank     | Further given as collateral | Total     | Held by Bank | Further given as collateral | Total |
|            |                                                                                 | (Rupees in '000) |                             |           |              |                             |       |
| <b>9.4</b> | <b>Securities held as collateral against lendings to financial institutions</b> |                  |                             |           |              |                             |       |
|            | Market Treasury Bills                                                           | 6,137,258        | –                           | 6,137,258 | –            | –                           | –     |
|            | Total                                                                           | 6,137,258        | –                           | 6,137,258 | –            | –                           | –     |

## 10. INVESTMENTS

### 10.1 Investments by type:

|  |                                      | 2020                |                          |                   |                | 2019                |                          |                   |                |
|--|--------------------------------------|---------------------|--------------------------|-------------------|----------------|---------------------|--------------------------|-------------------|----------------|
|  |                                      | Cost/amortised cost | Provision for diminution | Surplus/(Deficit) | Carrying value | Cost/amortised cost | Provision for diminution | Surplus/(Deficit) | Carrying value |
|  |                                      | (Rupees in '000)    |                          |                   |                |                     |                          |                   |                |
|  |                                      |                     |                          |                   |                |                     |                          |                   |                |
|  | <b>Held-for-trading securities</b>   |                     |                          |                   |                |                     |                          |                   |                |
|  | Federal Government Securities        | 1,309,116           | –                        | (224)             | 1,308,892      | 9,479,849           | –                        | (4,128)           | 9,475,721      |
|  | Shares                               | –                   | –                        | –                 | –              | 13,158              | –                        | (48)              | 13,110         |
|  |                                      | 1,309,116           | –                        | (224)             | 1,308,892      | 9,493,007           | –                        | (4,176)           | 9,488,831      |
|  | <b>Available-for-sale securities</b> |                     |                          |                   |                |                     |                          |                   |                |
|  | Federal Government Securities        | 946,641,148         | (4,719)                  | 9,537,433         | 956,173,862    | 666,128,289         | –                        | 4,981,349         | 671,109,638    |
|  | Shares and units                     | 26,582,088          | (10,116,283)             | 3,119,160         | 19,584,965     | 24,938,090          | (10,148,760)             | 1,497,556         | 16,286,886     |
|  | Non Government Debt Securities       | 1,797,840           | –                        | 2,252             | 1,800,092      | 1,309,773           | –                        | (3,359)           | 1,306,414      |
|  | Foreign Securities                   | 7,463,939           | (1,714)                  | 17,509            | 7,479,734      | 3,657,020           | –                        | 13,295            | 3,670,315      |
|  |                                      | 982,485,015         | (10,122,716)             | 12,676,354        | 985,038,653    | 696,033,172         | (10,148,760)             | 6,488,841         | 692,373,253    |
|  | <b>Held-to-maturity securities</b>   |                     |                          |                   |                |                     |                          |                   |                |
|  | Federal Government Securities        | 4,612,390           | (11,542)                 | –                 | 4,600,848      | 16,207,249          | (2,211)                  | –                 | 16,205,038     |
|  | Provincial Government Securities     | 118                 | (118)                    | –                 | –              | 118                 | (118)                    | –                 | –              |
|  | Non Government Debt Securities       | 9,270,317           | (490,341)                | –                 | 8,779,976      | 9,867,925           | (533,788)                | –                 | 9,334,137      |
|  | Foreign Securities                   | 3,149,647           | (27,281)                 | –                 | 3,122,366      | 8,320,599           | (3,569)                  | –                 | 8,317,030      |
|  |                                      | 17,032,472          | (529,282)                | –                 | 16,503,190     | 34,395,891          | (539,686)                | –                 | 33,856,205     |
|  | <b>Associates</b>                    | 10.12               | 700,401                  | –                 | 700,401        | 700,401             | –                        | –                 | 700,401        |
|  | <b>Subsidiaries</b>                  | 10.12               | 12,319,037               | (725)             | 12,318,312     | 12,346,537          | (725)                    | –                 | 12,345,812     |
|  | <b>Total Investments</b>             |                     | 1,013,846,041            | (10,652,723)      | 1,015,869,448  | 752,969,008         | (10,689,171)             | 6,484,665         | 748,764,502    |

# Notes To The Unconsolidated Financial Statements

For the year ended December 31, 2020

| Note                                                              | 2020                                  |                                |                       |                   | 2019                       |                                |                      |                   |
|-------------------------------------------------------------------|---------------------------------------|--------------------------------|-----------------------|-------------------|----------------------------|--------------------------------|----------------------|-------------------|
|                                                                   | Cost/<br>amortised<br>cost            | Provision<br>for<br>diminution | Surplus/<br>(Deficit) | Carrying<br>value | Cost/<br>amortised<br>cost | Provision<br>for<br>diminution | Surplus<br>(Deficit) | Carrying<br>value |
| (Rupees in '000)                                                  |                                       |                                |                       |                   |                            |                                |                      |                   |
| <b>10.2</b>                                                       | <b>Investments by segments:</b>       |                                |                       |                   |                            |                                |                      |                   |
|                                                                   | <b>Federal Government Securities:</b> |                                |                       |                   |                            |                                |                      |                   |
| Market Treasury Bills                                             | 598,470,191                           | -                              | 256,237               | 598,726,428       | 397,866,023                | -                              | (413,415)            | 397,452,608       |
| Pakistan Investment Bonds                                         | 349,738,865                           | -                              | 9,180,611             | 358,919,476       | 292,723,081                | -                              | 5,376,303            | 298,099,384       |
| Sukuks bonds                                                      | 1,791,122                             | (2,872)                        | 35,195                | 1,823,445         | 195,929                    | -                              | 14,333               | 210,262           |
| Naya Pakistan Certificates                                        | 465,779                               | -                              | -                     | 465,779           | -                          | -                              | -                    | -                 |
| Euro Bonds                                                        | 2,096,697                             | (13,389)                       | 65,166                | 2,148,474         | 1,030,354                  | (2,211)                        | -                    | 1,028,143         |
|                                                                   | 952,562,654                           | (16,261)                       | 9,537,209             | 962,083,602       | 691,815,387                | (2,211)                        | 4,977,221            | 696,790,397       |
| <b>Provincial Government Securities</b>                           | 118                                   | (118)                          | -                     | -                 | 118                        | (118)                          | -                    | -                 |
|                                                                   | <b>Shares:</b>                        |                                |                       |                   |                            |                                |                      |                   |
| Listed Companies                                                  | 24,999,638                            | (9,946,958)                    | 3,119,160             | 18,171,840        | 23,398,083                 | (9,982,844)                    | 1,497,508            | 14,912,747        |
| Unlisted Companies                                                | 1,582,450                             | (169,325)                      | -                     | 1,413,125         | 1,553,165                  | (165,916)                      | -                    | 1,387,249         |
|                                                                   | 26,582,088                            | (10,116,283)                   | 3,119,160             | 19,584,965        | 24,951,248                 | (10,148,760)                   | 1,497,508            | 16,299,996        |
|                                                                   | <b>Non Government Debt Securities</b> |                                |                       |                   |                            |                                |                      |                   |
| Listed                                                            | 5,064,730                             | (16,269)                       | 7,918                 | 5,056,379         | 4,946,646                  | (16,269)                       | (3,359)              | 4,927,018         |
| Unlisted                                                          | 6,003,427                             | (474,072)                      | (5,666)               | 5,523,689         | 6,231,052                  | (517,519)                      | -                    | 5,713,533         |
|                                                                   | 11,068,157                            | (490,341)                      | 2,252                 | 10,580,068        | 11,177,698                 | (533,788)                      | (3,359)              | 10,640,551        |
|                                                                   | <b>Foreign Securities</b>             |                                |                       |                   |                            |                                |                      |                   |
| Government securities                                             | 10,606,326                            | (27,281)                       | 17,509                | 10,596,554        | 11,517,802                 | (2,828)                        | 13,295               | 11,528,269        |
| Non Government Debt securities                                    | -                                     | -                              | -                     | -                 | 452,567                    | (741)                          | -                    | 451,826           |
| Unlisted equity securities                                        | 7,260                                 | (1,714)                        | -                     | 5,546             | 7,250                      | -                              | -                    | 7,250             |
|                                                                   | 10,613,586                            | (28,995)                       | 17,509                | 10,602,100        | 11,977,619                 | (3,569)                        | 13,295               | 11,987,345        |
|                                                                   | <b>Associates</b>                     |                                |                       |                   |                            |                                |                      |                   |
| - Adamjee Insurance<br>Company Limited                            | 647,880                               | -                              | -                     | 647,880           | 647,880                    | -                              | -                    | 647,880           |
| - Euronet Pakistan (Private) Limited                              | 52,521                                | -                              | -                     | 52,521            | 52,521                     | -                              | -                    | 52,521            |
|                                                                   | 700,401                               | -                              | -                     | 700,401           | 700,401                    | -                              | -                    | 700,401           |
|                                                                   | <b>Subsidiaries</b>                   |                                |                       |                   |                            |                                |                      |                   |
| MCB Islamic Bank Limited                                          | 11,550,000                            | -                              | -                     | 11,550,000        | 11,550,000                 | -                              | -                    | 11,550,000        |
| MCB Arif Habib Savings &<br>Investments Limited                   | 320,123                               | -                              | -                     | 320,123           | 320,123                    | -                              | -                    | 320,123           |
| Financial Management<br>Services (Pvt) Limited                    | 725                                   | (725)                          | -                     | -                 | 725                        | (725)                          | -                    | -                 |
| MCB Non-Bank Credit<br>Organization Closed<br>Joint Stock Company | 448,189                               | -                              | -                     | 448,189           | 448,189                    | -                              | -                    | 448,189           |
| MCB Financial Services Limited                                    | -                                     | -                              | -                     | -                 | 27,500                     | -                              | -                    | 27,500            |
|                                                                   | 12,319,037                            | (725)                          | -                     | 12,318,312        | 12,346,537                 | (725)                          | -                    | 12,345,812        |
| <b>Total Investments</b>                                          | 1,013,846,041                         | (10,652,723)                   | 12,676,130            | 1,015,869,448     | 752,969,008                | (10,689,171)                   | 6,484,665            | 748,764,502       |

## Notes To The Unconsolidated Financial Statements

For the year ended December 31, 2020

|                                                              | Note   | 2020<br>(Rupees in '000) | 2019              |
|--------------------------------------------------------------|--------|--------------------------|-------------------|
| <b>10.2.1 Investments given as collateral</b>                |        |                          |                   |
| - Market Treasury Bills                                      |        | 91,279,273               | 22,820,226        |
| - Pakistan Investment Bonds                                  |        | 1,000,283                | 5,316,208         |
|                                                              |        | <u>92,279,556</u>        | <u>28,136,434</u> |
| <b>10.3 Provision for diminution in value of investments</b> |        |                          |                   |
| <b>10.3.1</b> Opening balance                                |        | 10,689,171               | 7,865,388         |
| Exchange and other adjustments                               |        | 13,474                   | 251               |
| Charge / (reversals)                                         |        |                          |                   |
| Charge for the year                                          |        | 1,956,360                | 3,275,539         |
| Reversals for the year                                       |        | (1,529)                  | (29,964)          |
| Reversal on disposals                                        |        | (2,004,753)              | (422,043)         |
|                                                              |        | <u>(49,922)</u>          | <u>2,823,532</u>  |
| Amounts written off                                          |        | -                        | -                 |
| Closing balance                                              | 10.3.3 | <u>10,652,723</u>        | <u>10,689,171</u> |

### 10.3.2 Particulars of provision against debt securities Category of classification

|                 | 2020             |                | 2019           |                |
|-----------------|------------------|----------------|----------------|----------------|
|                 | NPI              | Provision      | NPI            | Provision      |
|                 | (Rupees in '000) |                |                |                |
| <b>Domestic</b> |                  |                |                |                |
| Doubtfull       | -                | -              | 145,656        | 72,828         |
| Loss            | 490,459          | 490,459        | 461,078        | 461,078        |
|                 | <u>490,459</u>   | <u>490,459</u> | <u>606,734</u> | <u>533,906</u> |

**10.3.3** This includes a general provision of Rs 43.542 million (December 31, 2019: Rs 5.780 million) held by overseas branches in accordance with the requirements of IFRS 9.

### 10.4 Quality of Available for Sale Securities

Details regarding quality of Available for Sale (AFS) securities are as follows;

|                                                              | 2020<br>(Rupees in '000) | 2019               |
|--------------------------------------------------------------|--------------------------|--------------------|
| <b>Federal Government Securities - Government guaranteed</b> |                          |                    |
| Market Treasury Bills                                        | 597,161,075              | 386,882,153        |
| Pakistan Investment Bonds                                    | 346,405,148              | 278,739,813        |
| Euro Bonds                                                   | 1,341,706                | 506,323            |
| Sukuk Bonds                                                  | 1,267,440                | -                  |
| Naya Pakistan Certificates                                   | 465,779                  | -                  |
|                                                              | <u>946,641,148</u>       | <u>666,128,289</u> |

## Notes To The Unconsolidated Financial Statements

For the year ended December 31, 2020

|                                          | 2020              | 2019              |
|------------------------------------------|-------------------|-------------------|
|                                          | (Rupees in '000)  |                   |
| <b>Listed Companies and mutual funds</b> |                   |                   |
| Automobile Assembler                     | 1,418,843         | 1,230,989         |
| Automobile Part and Accessories          | 413,930           | 413,930           |
| Cable and Electrical Goods               | 523,036           | 523,036           |
| Cement                                   | 2,050,172         | 2,100,969         |
| Chemical                                 | 285,638           | 75,680            |
| Close end Mutual Fund                    | 1,186,851         | 1,186,851         |
| Commercial Banks                         | 3,002,215         | 2,014,437         |
| Engineering                              | 1,587,837         | 1,818,843         |
| Fertilizer                               | 3,298,245         | 2,876,608         |
| Food and Personal Care Products          | 1,229,398         | 1,199,266         |
| Insurance                                | 599,364           | 599,364           |
| Investment Banks / Companies             | 41,784            | 41,784            |
| NIT Units                                | 5,253             | 5,253             |
| Oil & Gas Exploration Companies          | 2,747,824         | 2,533,285         |
| Oil & Gas Marketing Companies            | 452,460           | 434,633           |
| Open End Mutual Fund                     | 190,083           | 312,349           |
| Paper and Board                          | 340,473           | 391,951           |
| Pharmaceutical                           | 941,959           | 1,068,443         |
| Power Generation and Distribution        | 2,516,198         | 2,516,198         |
| Refinery                                 | 1,013,306         | 887,318           |
| Technology and Communication             | 707,827           | 706,796           |
| Textile                                  | 446,942           | 446,942           |
|                                          | <b>24,999,638</b> | <b>23,384,925</b> |

|  | 2020             |               | 2019 |               |
|--|------------------|---------------|------|---------------|
|  | Cost             | Breakup value | Cost | Breakup value |
|  | (Rupees in '000) |               |      |               |

|                                                   |                  |                  |                  |                  |
|---------------------------------------------------|------------------|------------------|------------------|------------------|
| <b>Unlisted Companies</b>                         |                  |                  |                  |                  |
| Central Depository Company Limited                | 184,426          | 756,153          | 184,426          | 687,011          |
| First Capital Investment (Pvt) Limited            | 2,500            | 2,667            | 2,500            | 3,334            |
| First Women Bank Limited                          | 63,300           | 215,838          | 63,300           | 215,838          |
| ISE Towers Reit Management Company Limited        | 30,346           | 93,780           | 30,346           | 87,958           |
| National Investment Trust Limited                 | 1,027,651        | 1,661,565        | 1,027,651        | 1,665,882        |
| National Institutional Facilitation Technologies  | 1,527            | 51,998           | 1,527            | 51,641           |
| Pak Agro Storage And Service Corporation          | 2,500            | 1,239,050        | 2,500            | 605,006          |
| 1 Link (Pvt) Limited                              | 50,000           | 202,032          | 50,000           | 147,332          |
| Naymat Collateral Management Company              | 29,285           | 25,876           | -                | -                |
| Arabian Sea Country Club                          | 5,000            | -                | 5,000            | -                |
| SME Bank Limited                                  | 10,106           | -                | 10,106           | -                |
| Al-Ameen Textile Mills Limited                    | 197              | -                | 197              | -                |
| Custodian Management Services                     | 1,000            | -                | 1,000            | -                |
| Galaxy Textile Mills Limited                      | 30,178           | -                | 30,178           | -                |
| Pakistan Textile City (Pvt) Limited               | 50,000           | -                | 50,000           | -                |
| Ayaz Textile Mills Limited                        | 2,253            | -                | 2,253            | -                |
| Musarrat Textile Mills Limited                    | 36,045           | -                | 36,045           | -                |
| Sadiqabad Textile Mills Limited                   | 26,361           | -                | 26,361           | -                |
| Al-Arabia Sugar Mills Limited - Preference shares | 4,775            | -                | 4,775            | -                |
| Pak Elektron Limited - Preference shares          | 25,000           | 25,000           | 25,000           | 25,000           |
|                                                   | <b>1,582,450</b> | <b>4,273,959</b> | <b>1,553,165</b> | <b>3,489,002</b> |

## Notes To The Unconsolidated Financial Statements

For the year ended December 31, 2020

|                                       | 2020             | 2019    |
|---------------------------------------|------------------|---------|
|                                       | Cost             |         |
|                                       | (Rupees in '000) |         |
| <b>Non Government Debt Securities</b> |                  |         |
| <b>Listed</b>                         |                  |         |
| - AA+, AA, AA-                        | 1,547,840        | 957,840 |
| <b>Unlisted</b>                       |                  |         |
| - AA+, AA, AA-                        | 250,000          | 250,000 |
| - A+, A, A-                           | -                | 101,933 |
|                                       | 250,000          | 351,933 |

|                              | 2020             |        | 2019      |        |
|------------------------------|------------------|--------|-----------|--------|
|                              | Cost             | Rating | Cost      | Rating |
|                              | (Rupees in '000) |        |           |        |
| <b>Foreign Securities</b>    |                  |        |           |        |
| <b>Government Securities</b> |                  |        |           |        |
| - Bahrain                    | -                | -      | -         | -      |
| - Sri Lanka                  | 7,456,679        | Caa1   | 3,649,770 | B2     |
|                              | 7,456,679        |        | 3,649,770 |        |

|                                                                                 | 2020             | 2019       |
|---------------------------------------------------------------------------------|------------------|------------|
|                                                                                 | Cost             |            |
|                                                                                 | (Rupees in '000) |            |
| <b>Unlisted</b>                                                                 |                  |            |
| Lanka Clear (Private) Limited                                                   | 857              | 854        |
| Credit Information Bureau of Sri Lanka                                          | 26               | 26         |
| Lanka Financial Services Bureau Limited                                         | 1,714            | 1,707      |
| Society for Worldwide Inter Fund Transfer (SWIFT)                               | 4,663            | 4,663      |
|                                                                                 | 7,260            | 7,250      |
| <b>10.5 Particulars relating to Held to Maturity securities are as follows:</b> |                  |            |
| <b>Federal Government Securities - Government guaranteed</b>                    |                  |            |
| Pakistan Investment Bonds                                                       | 3,333,719        | 13,842,253 |
| Market Treasury Bills                                                           | -                | 1,645,036  |
| Sukuk bonds                                                                     | 523,680          | 195,928    |
| Euro Bonds                                                                      | 754,991          | 524,032    |
|                                                                                 | 4,612,390        | 16,207,249 |
| <b>Provincial Government Securities</b>                                         | 118              | 118        |

## Notes To The Unconsolidated Financial Statements

For the year ended December 31, 2020

|                                       | 2020             | 2019             |
|---------------------------------------|------------------|------------------|
|                                       | Cost             |                  |
|                                       | (Rupees in '000) |                  |
| <b>Non Government Debt Securities</b> |                  |                  |
| <b>Listed</b>                         |                  |                  |
| - AAA                                 | 1,796,250        | 1,796,970        |
| - AA+, AA, AA-                        | 1,644,520        | 2,125,716        |
| - Unrated                             | 66,120           | 66,120           |
|                                       | <b>3,506,890</b> | <b>3,988,806</b> |
| <b>Unlisted</b>                       |                  |                  |
| - AA+, AA, AA-                        | 4,849,483        | 4,848,863        |
| - A+, A, A-                           | 439,874          | 439,910          |
| - Unrated                             | 474,070          | 590,346          |
|                                       | <b>5,763,427</b> | <b>5,879,119</b> |

|                              | 2020             |        | 2019             |        |
|------------------------------|------------------|--------|------------------|--------|
|                              | Cost             | Rating | Cost             | Rating |
|                              | (Rupees in '000) |        |                  |        |
| <b>Foreign Securities</b>    |                  |        |                  |        |
| <b>Government Securities</b> |                  |        |                  |        |
| - Sri Lanka                  | 3,149,647        | Caa1   | 1,544,542        | B2     |
| - United Arab Emirates       | -                |        | 6,323,490        | Aa2    |
|                              | <b>3,149,647</b> |        | <b>7,868,032</b> |        |

|                                      | 2020             | 2019           |
|--------------------------------------|------------------|----------------|
|                                      | Cost             |                |
|                                      | (Rupees in '000) |                |
| <b>NonGovernment Debt Securities</b> |                  |                |
| <b>Listed</b>                        |                  |                |
| - A+, A, A-                          | -                | 153,702        |
| <b>Unlisted</b>                      |                  |                |
| - AAA                                | -                | 298,865        |
|                                      | <b>-</b>         | <b>298,865</b> |

**10.5.1** The market value of securities classified as held-to-maturity as at December 31, 2020 amounted to Rs. 17,002.908 million (December 31, 2019: Rs. 33,464.168 million).

**10.6** Available for sale" Market Treasury Bills and Pakistan Investment Bonds are eligible for rediscounting with the State Bank of Pakistan.

## Notes To The Unconsolidated Financial Statements

For the year ended December 31, 2020

- 10.7** Investments include Pakistan Investment Bonds amounting to Rs. 67.9 million (2019: Rs. 67.9 million) earmarked by the SBP against TT discounting facilities sanctioned to the Bank. In addition, Pakistan Investment Bonds amounting to Rs. 5 million (2019: Rs. 5 million) have been pledged with the Controller of Military Accounts on account of Regimental Fund account and Pakistan Investment Bonds amounting to Rs.100 million (2019: Rs. 100 million ) have been pledged with the National Clearing Company of Pakistan Limited (NCCPL) on account of removal of irrevocable undertaking as alternate option for collateral against participant's exposure in stock market.
- 10.8** Investment of the Bank in Adamjee Insurance Company Limited is carried at cost amounting to Rs. 647.880 million (2019: Rs. 647.880 million) as at December 31, 2020. The market value of the investment in Adamjee Insurance Company Limited as at December 31, 2020 amounted to Rs. 2,752.400 million (2019: Rs. 2,946.300 million).
- 10.9** This investment is fully provided for. The company is dormant and has no asset and liability.
- 10.10** During the year, the Bank has disposed off its wholly owned subsidiary "MCB Financial Services Limited".
- 10.11** Certain approved / Government securities are kept with the SBP to meet statutory liquidity requirements calculated on the basis of domestic demand and time liabilities.

### 10.12 Summarized financial information of associates and subsidiaries

|                                                                                                        | Country of incorporation | % of interest held | Revenue    | Profit / (loss) after tax | Assets      | Liabilities |
|--------------------------------------------------------------------------------------------------------|--------------------------|--------------------|------------|---------------------------|-------------|-------------|
| (Rupees in '000)                                                                                       |                          |                    |            |                           |             |             |
| <b>2020</b>                                                                                            |                          |                    |            |                           |             |             |
| <b>Associates</b>                                                                                      |                          |                    |            |                           |             |             |
| Euronet Pakistan (Private) Limited<br>(unaudited based on December 31, 2020)                           | Pakistan                 | 30%                | 718,076    | (59,342)                  | 870,136     | 722,516     |
| Adamjee Insurance Company Limited<br>(unaudited based on September 30, 2020)                           | Pakistan                 | 20%                | 20,596,203 | 1,319,951                 | 95,997,472  | 74,918,209  |
| <b>Subsidiaries</b>                                                                                    |                          |                    |            |                           |             |             |
| MCB Islamic Bank Limited<br>(audited based on December 31, 2020)                                       | Pakistan                 | 100.00%            | 9,676,435  | 208,316                   | 141,170,886 | 130,443,114 |
| MCB Arif Habib Savings & Investments Limited<br>(audited based on June 30, 2020)                       | Pakistan                 | 51.33%             | 835,520    | 257,669                   | 2,265,572   | 714,877     |
| MCB Non-Bank Credit Organization Closed<br>Joint Stock Company<br>(audited based on December 31, 2020) | Azerbaijan               | 99.94%             | 163,849    | 46,863                    | 825,024     | 400,034     |

# Notes To The Unconsolidated Financial Statements

For the year ended December 31, 2020

|                                                                                                        | Country of incorporation | % of interest held | Revenue    | Profit / (loss) after tax | Assets      | Liabilities |
|--------------------------------------------------------------------------------------------------------|--------------------------|--------------------|------------|---------------------------|-------------|-------------|
| (Rupees in '000)                                                                                       |                          |                    |            |                           |             |             |
| <b>2019</b>                                                                                            |                          |                    |            |                           |             |             |
| <b>Associates</b>                                                                                      |                          |                    |            |                           |             |             |
| Euronet Pakistan (Private) Limited<br>(unaudited based on December 31, 2019)                           | Pakistan                 | 30%                | 557,579    | 25,769                    | 648,477     | 435,306     |
| Adamjee Insurance Company Limited<br>(unaudited based on September 30, 2019)                           | Pakistan                 | 20%                | 19,551,861 | 1,108,984                 | 82,967,479  | 63,892,816  |
| <b>Subsidiaries</b>                                                                                    |                          |                    |            |                           |             |             |
| MCB Islamic Bank Limited<br>(audited based on December 31, 2019)                                       | Pakistan                 | 100.00%            | 9,848,819  | (243,612)                 | 105,017,261 | 94,550,460  |
| MCB Arif Habib Savings & Investments Limited<br>(audited based on June 30, 2019)                       | Pakistan                 | 51.33%             | 715,079    | 24,235                    | 2,044,323   | 582,097     |
| MCB Non-Bank Credit Organization<br>Closed Joint Stock Company<br>(audited based on December 31, 2019) | Azerbaijan               | 99.94%             | 155,085    | 55,014                    | 943,878     | 576,914     |
| MCB Financial Services Limited<br>(audited based on December 31, 2019)                                 | Pakistan                 | 100.00%            | 41,537     | 11,442                    | 96,910      | 3,956       |

## 11. ADVANCES

| Note                                        | Performing  |             | Non Performing |              | Total        |              |
|---------------------------------------------|-------------|-------------|----------------|--------------|--------------|--------------|
|                                             | 2020        | 2019        | 2020           | 2019         | 2020         | 2019         |
| (Rupees in '000)                            |             |             |                |              |              |              |
| Loans, cash credits, running finances, etc. | 444,168,998 | 471,126,199 | 50,524,753     | 48,759,157   | 494,693,751  | 519,885,356  |
| Bills discounted and purchased              | 18,192,157  | 19,486,758  | 664,294        | 665,102      | 18,856,451   | 20,151,860   |
| Advances - gross                            | 462,361,155 | 490,612,957 | 51,189,047     | 49,424,259   | 513,550,202  | 540,037,216  |
| Provision against advances                  |             |             |                |              |              |              |
| - Specific                                  | -           | -           | (45,142,956)   | (41,934,421) | (45,142,956) | (41,934,421) |
| - General                                   | (5,465,459) | (1,423,921) | -              | -            | (5,465,459)  | (1,423,921)  |
|                                             | (5,465,459) | (1,423,921) | (45,142,956)   | (41,934,421) | (50,608,415) | (43,358,342) |
| Advances - net of provision                 | 456,895,696 | 489,189,036 | 6,046,091      | 7,489,838    | 462,941,787  | 496,678,874  |



## Notes To The Unconsolidated Financial Statements

For the year ended December 31, 2020

### 11.1 Includes net investment in finance lease as disclosed below:

|                                         | 2020                    |                                        |                |           | 2019                    |                                        |                |           |
|-----------------------------------------|-------------------------|----------------------------------------|----------------|-----------|-------------------------|----------------------------------------|----------------|-----------|
|                                         | Not later than one year | Late than one and less than five years | Over five year | Total     | Not later than one year | Late than one and less than five years | Over five year | Total     |
|                                         | (Rupees in '000)        |                                        |                |           |                         |                                        |                |           |
| Lease rentals receivable                | 1,521,860               | 1,436,815                              | 1,133,794      | 4,092,469 | 56,237                  | 1,972,680                              | 2,365,197      | 4,394,114 |
| Residual value                          | 20,428                  | 103,490                                | 23,039         | 146,957   | 14,769                  | 35,544                                 | 10,368         | 60,681    |
| Minimum lease payments                  | 1,542,288               | 1,540,305                              | 1,156,833      | 4,239,426 | 71,006                  | 2,008,224                              | 2,375,565      | 4,454,795 |
| Financial charges for future periods    | (3,770)                 | (255,311)                              | (418,859)      | (677,940) | (3,376)                 | (247,521)                              | (517,870)      | (768,767) |
| Present value of minimum lease payments | 1,538,518               | 1,284,994                              | 737,974        | 3,561,486 | 67,630                  | 1,760,703                              | 1,857,695      | 3,686,028 |

|                                             | 2020             | 2019        |
|---------------------------------------------|------------------|-------------|
|                                             | (Rupees in '000) |             |
| <b>11.2 Particulars of advances (Gross)</b> |                  |             |
| In local currency                           | 469,211,685      | 481,408,603 |
| In foreign currencies                       | 44,338,517       | 58,628,613  |
|                                             | 513,550,202      | 540,037,216 |

**11.3** Advances include Rs. 51,189.047 million (2019: Rs.49,424.259 million ) which have been placed under the non-performing status as detailed below:

|                                   | Note   | 2020                 |            | 2019                 |            |
|-----------------------------------|--------|----------------------|------------|----------------------|------------|
|                                   |        | Non performing loans | Provision  | Non performing loans | Provision  |
|                                   |        | (Rupees in '000)     |            |                      |            |
| <b>Category of Classification</b> |        |                      |            |                      |            |
| <b>Domestic</b>                   |        |                      |            |                      |            |
| Other Assets Especially           |        |                      |            |                      |            |
| Mentioned                         | 11.3.1 | 43,508               | 1,983      | 123,678              | 3,529      |
| Substandard                       |        | 211,900              | 52,156     | 584,129              | 145,075    |
| Doubtful                          |        | 264,759              | 132,380    | 2,690,841            | 1,345,421  |
| Loss                              |        | 42,224,438           | 41,485,949 | 37,835,619           | 37,087,269 |
|                                   |        | 42,744,605           | 41,672,468 | 41,234,267           | 38,581,294 |
| <b>Overseas</b>                   |        |                      |            |                      |            |
| Not past due but impaired         |        | -                    | -          | -                    | -          |
| Overdue by:                       |        |                      |            |                      |            |
| Upto 90 days                      |        | 5,321                | 4,913      | 10,688               | 7,400      |
| 91 to 180 days                    |        | 2,020                | 505        | 118,182              | 95,452     |
| 181 to 365 days                   |        | 19,961               | 9,981      | 141,231              | 137,601    |
| > 365 days                        |        | 8,417,140            | 3,455,089  | 7,919,891            | 3,112,674  |
|                                   |        | 8,444,442            | 3,470,488  | 8,189,992            | 3,353,127  |
| Total                             |        | 51,189,047           | 45,142,956 | 49,424,259           | 41,934,421 |

**11.3.1** This represents non-performing portfolio of agricultural and small enterprise financing classified as OAEM as per the requirements of the Prudential Regulation for Agricultural and Small Enterprise Financing issued by the State Bank of Pakistan.

# Notes To The Unconsolidated Financial Statements

For the year ended December 31, 2020

## 11.4 Particulars of provision against advances

| Note                 | 2020        |           |             | 2019        |           |             |
|----------------------|-------------|-----------|-------------|-------------|-----------|-------------|
|                      | Specific    | General   | Total       | Specific    | General   | Total       |
| (Rupees in '000)     |             |           |             |             |           |             |
| Opening balance      | 41,934,421  | 1,423,921 | 43,358,342  | 41,943,509  | 1,266,717 | 43,210,226  |
| Exchange adjustments | 50,555      | 7,065     | 57,620      | 302,297     | 21,237    | 323,534     |
| Charge for the year  | 5,703,057   | 4,097,524 | 9,800,581   | 3,356,159   | 155,449   | 3,511,608   |
| Reversals            | (2,215,829) | (63,051)  | (2,278,880) | (3,649,742) | (19,482)  | (3,669,224) |
| Amounts written off  | 3,487,228   | 4,034,473 | 7,521,701   | (293,583)   | 135,967   | (157,616)   |
|                      | (329,248)   | -         | (329,248)   | (17,802)    | -         | (17,802)    |
| Closing balance      | 45,142,956  | 5,465,459 | 50,608,415  | 41,934,421  | 1,423,921 | 43,358,342  |

### 11.4.1 Particulars of provision against advances

|                       | 2020       |           |            | 2019       |           |            |
|-----------------------|------------|-----------|------------|------------|-----------|------------|
|                       | Specific   | General   | Total      | Specific   | General   | Total      |
| (Rupees in '000)      |            |           |            |            |           |            |
| In local currency     | 41,672,468 | 5,148,833 | 46,821,301 | 38,581,294 | 1,087,464 | 39,668,758 |
| In foreign currencies | 3,470,488  | 316,626   | 3,787,114  | 3,353,127  | 336,457   | 3,689,584  |
|                       | 45,142,956 | 5,465,459 | 50,608,415 | 41,934,421 | 1,423,921 | 43,358,342 |

**11.4.2** State Bank of Pakistan vide BSD Circular No. 2 dated January 27, 2009, BSD Circular No. 10 dated October 20, 2009, BSD Circular No. 02 of 2010 dated June 03, 2010 and BSD Circular No.1 of 2011 dated October 21, 2011 has allowed benefit of forced sale value (FSV) of Plant & Machinery under charge, pledged stock and mortgaged residential, commercial & industrial properties (land and building only) held as collateral against NPLs for five years from the date of classification. However, management has not taken the FSV benefit in calculation of specific provision.

**11.4.3** This includes reversal of provisions and reduction of non-performing loans amounting to Rs. 84 million (2019: Rs. NIL) as a result of settlement on debt asset swap arrangement with customers.

**11.4.4** General provision against consumer loans represents provision maintained against fully secured performing portfolio and unsecured performing portfolio as required by the Prudential Regulations issued by the SBP. General provision against Small Enterprise Finance represents provision maintained at an amount equal to 1% of unsecured performing portfolio as required by the Prudential Regulations issued by the SBP. General provisions pertaining to overseas advances are made in accordance with the requirements of the regulatory authorities of the respective countries in which the overseas branches operate.

In addition, the Bank has also maintained a general provision of Rs 4,564.689 million (December 31, 2019: Rs 527 million) against financing made on prudent basis. This general provision is in addition to the requirements of Prudential Regulations. Also refer note 5 to these unconsolidated financial statements.

| Note                                              | 2020             |         | 2019   |  |
|---------------------------------------------------|------------------|---------|--------|--|
|                                                   | (Rupees in '000) |         |        |  |
| <b>11.5 PARTICULARS OF WRITE OFFS:</b>            |                  |         |        |  |
| <b>11.5.1</b> Against Provisions                  | 11.4             | 329,248 | 17,802 |  |
| Directly charged to Profit & Loss account         |                  | -       | -      |  |
|                                                   |                  | 329,248 | 17,802 |  |
| <b>11.5.2</b> Write Offs of Rs. 500,000 and above |                  |         |        |  |
| - Domestic                                        | 11.6             | 299,535 | 14,613 |  |
| - Overseas                                        |                  | -       | 2,725  |  |
| Write Offs of below Rs. 500,000                   |                  | 29,713  | 464    |  |
|                                                   |                  | 329,248 | 17,802 |  |

## Notes To The Unconsolidated Financial Statements

For the year ended December 31, 2020

### 11.6 DETAILS OF LOAN WRITE OFF OF Rs. 500,000/- AND ABOVE

In terms of sub-section (3) of Section 33A of the Banking Companies Ordinance, 1962, the statement in respect of written-off loans or any other financial relief of Rupees five hundred thousand or above allowed to a person(s) during the year ended December 31, 2020 is given at Annexure I of the unconsolidated financial statements. However, this write off does not affect the Bank's right to recover the debts from these customers.

|                                      | Note | 2020<br>(Rupees in '000) | 2019       |
|--------------------------------------|------|--------------------------|------------|
| <b>12. FIXED ASSETS</b>              |      |                          |            |
| Capital work-in-progress             | 12.1 | 802,966                  | 975,566    |
| Property and equipment               | 12.2 | 50,467,607               | 49,620,934 |
| Right-of-use assets                  | 12.3 | 6,757,331                | 7,674,745  |
|                                      |      | 58,027,904               | 58,271,245 |
| <b>12.1 Capital work-in-progress</b> |      |                          |            |
| Civil works                          |      | 418,187                  | 451,189    |
| Equipment                            |      | 98,383                   | 90,946     |
| Advances to suppliers                |      | 283,029                  | 428,617    |
| Others                               |      | 3,367                    | 4,814      |
|                                      |      | 802,966                  | 975,566    |

### 12.2 Property and Equipment

|                                              | 2020             |                |                           |                            |                        |                                           |           |                       |              |
|----------------------------------------------|------------------|----------------|---------------------------|----------------------------|------------------------|-------------------------------------------|-----------|-----------------------|--------------|
|                                              | Freehold land    | Leasehold land | Building on Freehold land | Building on Leasehold land | Furniture and fixtures | Electrical, office and computer equipment | Vehicles  | Leasehold improvement | Total        |
|                                              | (Rupees in '000) |                |                           |                            |                        |                                           |           |                       |              |
| <b>At January 1, 2020</b>                    |                  |                |                           |                            |                        |                                           |           |                       |              |
| Cost / Revalued amount                       | 26,123,665       | 2,893,079      | 13,898,388                | 637,102                    | 1,860,523              | 14,508,613                                | 1,070,928 | 854,594               | 61,846,892   |
| Accumulated depreciation                     | -                | -              | -                         | -                          | (1,107,450)            | (10,205,701)                              | (603,975) | (308,832)             | (12,225,958) |
| Net book value                               | 26,123,665       | 2,893,079      | 13,898,388                | 637,102                    | 753,073                | 4,302,912                                 | 466,953   | 545,762               | 49,620,934   |
| <b>Year ended December 31, 2020</b>          |                  |                |                           |                            |                        |                                           |           |                       |              |
| Opening net book value                       | 26,123,665       | 2,893,079      | 13,898,388                | 637,102                    | 753,073                | 4,302,912                                 | 466,953   | 545,762               | 49,620,934   |
| Additions                                    | 189,607          | 6,999          | 975,707                   | 168,601                    | 209,610                | 985,975                                   | 56,916    | 370,722               | 2,964,137    |
| Disposals                                    | -                | -              | (85,546)                  | -                          | (488)                  | (4,336)                                   | (23,938)  | -                     | (114,308)    |
| Depreciation charge                          | -                | -              | (487,380)                 | (28,597)                   | (141,646)              | (1,112,379)                               | (109,472) | (125,587)             | (2,005,061)  |
| Exchange rate adjustments                    | -                | -              | 413                       | 691                        | 256                    | 582                                       | 335       | (372)                 | 1,905        |
| Transfers                                    | -                | -              | (17,242)                  | -                          | 61                     | (61)                                      | -         | 17,242                | -            |
| Closing net book value                       | 26,313,272       | 2,900,078      | 14,284,340                | 777,797                    | 820,866                | 4,172,693                                 | 390,794   | 807,767               | 50,467,607   |
| <b>At December 31, 2020</b>                  |                  |                |                           |                            |                        |                                           |           |                       |              |
| Cost / Revalued amount                       | 26,313,272       | 2,900,078      | 14,770,261                | 806,387                    | 2,052,270              | 15,340,049                                | 1,012,162 | 1,217,035             | 64,411,514   |
| Accumulated depreciation                     | -                | -              | (485,921)                 | (28,590)                   | (1,231,404)            | (11,167,356)                              | (621,368) | (409,268)             | (13,943,907) |
| Net book value                               | 26,313,272       | 2,900,078      | 14,284,340                | 777,797                    | 820,866                | 4,172,693                                 | 390,794   | 807,767               | 50,467,607   |
| Rate of depreciation / estimated useful life | -                | -              | Upto 60 years             | Upto 50 years              | 10%                    | 10%-25%                                   | 20%       | Lease term            | -            |

# Notes To The Unconsolidated Financial Statements

For the year ended December 31, 2020

|                                                        | 2019             |                |                           |                            |                        |                                           |           |                       |              |
|--------------------------------------------------------|------------------|----------------|---------------------------|----------------------------|------------------------|-------------------------------------------|-----------|-----------------------|--------------|
|                                                        | Freehold land    | Leasehold land | Building on Freehold land | Building on Leasehold land | Furniture and fixtures | Electrical, office and computer equipment | Vehicles  | Leasehold improvement | Total        |
|                                                        | (Rupees in '000) |                |                           |                            |                        |                                           |           |                       |              |
| <b>At January 1, 2019</b>                              |                  |                |                           |                            |                        |                                           |           |                       |              |
| Cost / Revalued amount                                 | 19,556,136       | 2,440,151      | 12,138,906                | 563,273                    | 1,689,662              | 13,954,280                                | 1,149,293 | 521,985               | 52,013,686   |
| Accumulated depreciation                               | -                | -              | (865,869)                 | (116,820)                  | (996,689)              | (9,595,619)                               | (613,480) | (252,675)             | (12,441,152) |
| Net book value                                         | 19,556,136       | 2,440,151      | 11,273,037                | 446,453                    | 692,973                | 4,358,661                                 | 535,813   | 269,310               | 39,572,534   |
| <b>Year ended December 31, 2019</b>                    |                  |                |                           |                            |                        |                                           |           |                       |              |
| Opening net book value                                 | 19,556,136       | 2,440,151      | 11,273,037                | 446,453                    | 692,973                | 4,358,661                                 | 535,813   | 269,310               | 39,572,534   |
| Additions                                              | 805,354          | -              | 1,978,039                 | 142,646                    | 192,157                | 1,088,501                                 | 100,175   | 352,874               | 4,659,746    |
| Movement in surplus on assets revalued during the year | 5,744,825        | 452,928        | 1,019,986                 | 73,227                     | -                      | -                                         | -         | -                     | 7,290,966    |
| Transfer from Non-Banking assets                       | 34,000           | -              | 17,520                    | -                          | -                      | -                                         | -         | -                     | 51,520       |
| Disposal                                               | (21,000)         | -              | -                         | -                          | (1,306)                | (4,777)                                   | (40,683)  | (262)                 | (68,028)     |
| Depreciation charge                                    | -                | -              | (406,881)                 | (27,778)                   | (132,669)              | (1,147,355)                               | (132,259) | (69,704)              | (1,916,646)  |
| Exchange rate adjustments                              | -                | -              | 9,566                     | 2,554                      | 3,167                  | 6,633                                     | 3,907     | 5,015                 | 30,842       |
| Transfers                                              | 4,350            | -              | 7,121                     | -                          | (1,249)                | 1,249                                     | -         | (11,471)              | -            |
| Closing net book value                                 | 26,123,665       | 2,893,079      | 13,898,388                | 637,102                    | 753,073                | 4,302,912                                 | 466,953   | 545,762               | 49,620,934   |
| <b>At December 31, 2019</b>                            |                  |                |                           |                            |                        |                                           |           |                       |              |
| Cost / Revalued amount                                 | 26,123,665       | 2,893,079      | 13,898,388                | 637,102                    | 1,860,523              | 14,508,613                                | 1,070,928 | 854,594               | 61,846,892   |
| Accumulated depreciation                               | -                | -              | -                         | -                          | (1,107,450)            | (10,205,701)                              | (603,975) | (308,832)             | (12,225,958) |
| Net book value                                         | 26,123,665       | 2,893,079      | 13,898,388                | 637,102                    | 753,073                | 4,302,912                                 | 466,953   | 545,762               | 49,620,934   |
| Rate of depreciation / estimated useful life           | -                | -              | Upto 60 years             | Upto 50 years              | 10%                    | 10%-25%                                   | 20%       | Lease term            | -            |

**12.2.1** Leasehold land include a plot of land measuring 3,120.46 square yards having book value of Rs. 1,419.809 million situated at Railway Quarters, I.I. Chundrigar Road, Karachi, (the "Plot"), where a tenant is claiming for the possession as tenant of an insignificant area of only 18 square feet of the plot, however there is no issue over the title of the subject property. Both the Constitutional Petitions filed by the Bank have been dismissed by the Sindh High Court on 28 January 2016 against the Bank. The Bank has filed an appeal before the Supreme Court of Pakistan.

**12.2.2** The land and buildings of the Bank were revalued as at December 31, 2019 by independent valuers (K.G. Traders (Pvt) Limited, Tristar International Consultant (Pvt) Limited & Sardar Enterprises), valuation and engineering consultants, on the basis of market value. The total surplus against revaluation of fixed assets as at December 31, 2020 amounts to Rs. 20,211.952 million.

**12.2.3** Had the land and buildings not been revalued, the total carrying amounts of revalued properties as at December 31, 2020 would have been as follows:

(Rupees in '000)

|           |            |
|-----------|------------|
| Land      | 12,676,870 |
| Buildings | 11,386,665 |

## Notes To The Unconsolidated Financial Statements

For the year ended December 31, 2020

**12.2.4** The gross carrying amount (cost) of fully depreciated assets that are still in use are as follows:

(Rupees in '000)

|                                            |           |
|--------------------------------------------|-----------|
| Furniture and fixtures                     | 604,447   |
| Electrical, computers and office equipment | 7,251,702 |
| Vehicles                                   | 474,229   |

**12.2.5** Carrying amount of temporarily idle property of the Bank is Rs. 436.136 million (2019: Rs. 161.886 million).

**12.2.6** The information relating to disposal of operating fixed assets to related parties is given in Annexure II of these unconsolidated financial statements.

|                          | Note                                                  | 2020<br>(Rupees in '000) | 2019<br>(Rupees in '000) |
|--------------------------|-------------------------------------------------------|--------------------------|--------------------------|
| <b>12.3</b>              | <b>Movement in right-of-use assets is as follows:</b> |                          |                          |
| Opening balance          |                                                       | 7,674,745                | 8,426,460                |
| Additions / Adjustments  |                                                       | 734,068                  | 410,080                  |
| Derecognition            |                                                       | (434,698)                | –                        |
| Depreciation charge      | 31                                                    | (1,216,784)              | (1,161,795)              |
| Closing net book value   |                                                       | 6,757,331                | 7,674,745                |
| <b>13.</b>               | <b>INTANGIBLE ASSETS</b>                              |                          |                          |
| Capital work-in-progress |                                                       | 394,643                  | 316,742                  |
| Computer software        | 13.1                                                  | 543,815                  | 640,810                  |
|                          |                                                       | 938,458                  | 957,552                  |

2020  
(Rupees in '000)  
Computer software

|                                         |                               |               |               |
|-----------------------------------------|-------------------------------|---------------|---------------|
| <b>13.1</b>                             | <b>At January 1</b>           |               |               |
| Cost                                    |                               | 3,963,740     | 3,380,565     |
| Accumulated amortisation                |                               | (3,322,930)   | (3,008,229)   |
| Net book value                          |                               | 640,810       | 372,336       |
|                                         | <b>Year ended December 31</b> |               |               |
| Opening net book value                  |                               | 640,810       | 372,336       |
| Additions                               |                               | 220,979       | 566,863       |
| Amortisation charge                     |                               | (318,024)     | (301,022)     |
| Exchange rate adjustments               |                               | 50            | 2,633         |
| Closing net book value                  |                               | 543,815       | 640,810       |
|                                         | <b>At December 31</b>         |               |               |
| Cost                                    |                               | 4,185,598     | 3,963,740     |
| Accumulated amortisation and impairment |                               | (3,641,783)   | (3,322,930)   |
| Net book value                          |                               | 543,815       | 640,810       |
| Rate of amortisation (percentage)       |                               | 14% to 33.33% | 14% to 33.33% |
| Useful life                             |                               | 3 - 7 years   | 3 - 7 years   |

**13.2** The gross carrying amount (cost) of fully depreciated intangible assets that are still in use is Rs. 3,085.368 million.

## Notes To The Unconsolidated Financial Statements

For the year ended December 31, 2020

|                                                                                   | Note | 2020<br>(Rupees in '000) | 2019       |
|-----------------------------------------------------------------------------------|------|--------------------------|------------|
| <b>14. OTHER ASSETS</b>                                                           |      |                          |            |
| Income/ mark-up accrued in local currency                                         |      | 17,085,615               | 22,099,766 |
| Income/ mark-up accrued in foreign currencies                                     |      | 305,759                  | 558,407    |
| Advances, deposits, advance rent and other prepayments                            |      | 2,249,497                | 3,720,012  |
| Advance taxation (payments less provisions)                                       |      | –                        | –          |
| Compensation for delayed income tax refunds                                       |      | 133,809                  | 133,809    |
| Non-banking assets acquired in satisfaction of claims                             | 14.1 | 3,277,778                | 3,251,508  |
| Branch adjustment account                                                         |      | 276,102                  | 37,075     |
| Mark to market gain on forward foreign exchange contracts                         |      | 4,854,527                | 3,875,681  |
| Unrealized gain on derivative financial instruments                               | 25   | 517,033                  | 1,236,517  |
| Acceptances                                                                       | 20   | 20,030,754               | 18,152,032 |
| Receivable from the pension fund                                                  | 38.4 | 3,370,179                | 3,605,121  |
| Others                                                                            |      | 5,961,655                | 9,399,297  |
|                                                                                   |      | 58,062,708               | 66,069,225 |
| Less: Provision held against other assets                                         | 14.2 | 2,582,686                | 2,604,137  |
| Other Assets (net of provision)                                                   |      | 55,480,022               | 63,465,088 |
| Surplus on revaluation of non-banking assets acquired in satisfaction of claims   |      | 854,231                  | 677,660    |
| Other Assets - total                                                              |      | 56,334,253               | 64,142,748 |
| <b>14.1</b> Market value of Non-banking assets acquired in satisfaction of claims |      | 4,036,914                | 3,838,230  |

Non-banking assets acquired in satisfaction of claims of the Bank are revalued as at December 31, 2020 by independent valuers (Tristar International Consultant, Design Crafts, Material Design Services, Pee Dee & Associates and J&M Associates) on the basis of market value.

|                                                                                         | Note     | 2020<br>(Rupees in '000) | 2019      |
|-----------------------------------------------------------------------------------------|----------|--------------------------|-----------|
| <b>14.1.1 Non-banking assets acquired in satisfaction of claims</b>                     |          |                          |           |
| Opening balance                                                                         |          | 3,838,230                | 4,035,114 |
| Additions                                                                               |          | 84,000                   | 64,445    |
| Revaluation                                                                             |          | 183,915                  | 255,040   |
| Disposals                                                                               |          | (35,024)                 | (428,052) |
| Depreciation                                                                            |          | (30,049)                 | (45,456)  |
| (Charge) / reversal of impairment                                                       |          | (4,158)                  | 8,659     |
| Transfer to fixed assets                                                                |          | –                        | (51,520)  |
| Closing balance                                                                         |          | 4,036,914                | 3,838,230 |
| <b>14.1.2 Gain on disposal of non-banking assets acquired in satisfaction of claims</b> |          |                          |           |
| Disposal proceeds                                                                       |          | 39,000                   | 540,000   |
| Less                                                                                    |          |                          |           |
| - Cost                                                                                  |          | 35,820                   | 433,813   |
| - Depreciation                                                                          |          | (796)                    | (5,761)   |
|                                                                                         |          | 35,024                   | 428,052   |
| Gain                                                                                    | 14.1.2.1 | 3,976                    | 111,948   |

## Notes To The Unconsolidated Financial Statements

For the year ended December 31, 2020

| Note                                                                         | 2020<br>(Rupees in '000) | 2019             |
|------------------------------------------------------------------------------|--------------------------|------------------|
| <b>14.1.2.1 Breakup of gain/loss realized on sale of non-banking assets:</b> |                          |                  |
| Commercial property Rawalpindi                                               | 3,976                    | –                |
| Industrial property Lahore                                                   | –                        | 111,948          |
|                                                                              | <b>3,976</b>             | <b>111,948</b>   |
| <b>14.2 Provision held against other assets</b>                              |                          |                  |
| Non banking assets acquired in satisfaction of claims                        | 95,095                   | 90,938           |
| Others                                                                       | 2,487,591                | 2,513,199        |
|                                                                              | <b>2,582,686</b>         | <b>2,604,137</b> |
| <b>14.2.1 Movement in provision held against other assets</b>                |                          |                  |
| Opening balance                                                              | 2,604,137                | 2,550,584        |
| Charge for the year                                                          | 54,269                   | 12,587           |
| Reversals                                                                    | (77,917)                 | (36,023)         |
|                                                                              | 33                       | (23,436)         |
| Amount written off                                                           | (16,591)                 | (3,638)          |
| Exchange and other adjustments                                               | 18,788                   | 80,627           |
| Closing balance                                                              | <b>2,582,686</b>         | <b>2,604,137</b> |

### 15. CONTINGENT ASSETS

There were no contingent assets of the Bank as at December 31, 2020 (2019: NIL).

| Note                                                         | 2020<br>(Rupees in '000) | 2019               |
|--------------------------------------------------------------|--------------------------|--------------------|
| <b>16. BILLS PAYABLE</b>                                     |                          |                    |
| In Pakistan                                                  | 23,912,803               | 11,786,207         |
| Outside Pakistan                                             | 67,889                   | 35,491             |
|                                                              | <b>23,980,692</b>        | <b>11,821,698</b>  |
| <b>17. BORROWINGS</b>                                        |                          |                    |
| <b>Secured</b>                                               |                          |                    |
| Borrowings from State Bank of Pakistan                       |                          |                    |
| Under export refinance scheme                                | 17.1                     | 34,998,802         |
| Under long term financing facility                           | 17.2                     | 22,150,335         |
| Under renewable energy performance platform                  | 17.3                     | 74,760             |
| Refinance Scheme for wages and salaries                      | 17.4                     | 10,074,011         |
| Temporary economic refinance facility                        | 17.5                     | 1,694,659          |
| Under financing facility for storage of agricultural produce | 17.6                     | 191,254            |
|                                                              |                          | <b>69,183,821</b>  |
| Repurchase agreement borrowings                              | 17.7                     | 92,225,530         |
| <b>Total secured</b>                                         |                          | <b>161,409,351</b> |
| <b>Unsecured</b>                                             |                          |                    |
| Borrowings from other financial institution                  | 17.8                     | 1,712,914          |
| Call borrowings                                              | 17.9                     | 319,669            |
| Overdrawn nostro accounts                                    |                          | 397,313            |
| Others                                                       |                          | 162,286            |
| <b>Total unsecured</b>                                       |                          | <b>2,592,182</b>   |
|                                                              | 17.10                    | <b>164,001,533</b> |

## Notes To The Unconsolidated Financial Statements

For the year ended December 31, 2020

- 17.1** The Bank has entered into agreements for financing with the State Bank of Pakistan (SBP) for extending export finance to customers. As per the agreements, the Bank has granted SBP the right to recover the outstanding amount from the Bank at the date of maturity of the finance by directly debiting the current account maintained by the Bank with SBP. These borrowings are repayable within six months. These carry mark up rates ranging from 1.0% to 2.0% per annum.
- 17.2** These borrowings have been obtained from the SBP for providing financing facilities to exporters for adoption of new technologies and modernization of their plant and machinery. These borrowings are repayable within a period ranging from 3 years to 10 years. These carry mark up rates ranging from 2.0% to 3.50% per annum.
- 17.3** These borrowings have been obtained from the SBP for providing financing facilities to customers against renewable energy projects. These borrowings are repayable within a period of twelve years with two years grace period from date of disbursement. These carry mark up rate of 2% per annum.
- 17.4** These borrowings have been obtained from the SBP for providing financing facilities to help businesses in payment of wages and salaries to their workers and employees for supporting continued employment. These borrowing are repayable in 8 equal quarterly instalments beginning from January 2021. These carry mark up rates ranging from 0% to 2% per annum.
- 17.5** These borrowings have been obtained from the SBP for providing concessionary refinancing facility to the industry for purchase of new imported and locally manufactured plant & machinery to set up new projects. These borrowings are repayable within a period of ten years including a grace period of upto 2 years. These carry mark up rate of 1% per annum.
- 17.6** These borrowings have been obtained from SBP under "Financing Facility for Storage of Agricultural Produce (FFSAP)" to encourage Private Sector to establish Silos, Warehouses and Cold Storages. These borrowings are repayable within a period ranging from 3 years to 10 years. These carry mark up rates ranging from 2.50% to 3.50% per annum.
- 17.7** These carry mark-up rates ranging from 6.15% to 7.25% per annum (2019:8.0% to 13.20% per annum) and are secured against government securities of carrying value of Rs. 92,279.556 million (2019: Rs. 28,136.434 million). These are repayable latest by February 2021.
- 17.8** These carry mark-up rates ranging from 1.90% to 4.00% per annum (2019: 2.75% to 3.00% per annum). These are repayable latest by August 2022.
- 17.9** These carry mark-up at the rate of 1.15% per annum (2019: 2.30% to 13.10% per annum). These are repayable by January 2021.

|                                                                   | 2020             | 2019       |
|-------------------------------------------------------------------|------------------|------------|
|                                                                   | (Rupees in '000) |            |
| <b>17.10 Particulars of borrowings with respect to currencies</b> |                  |            |
| In local currency                                                 | 161,494,499      | 85,452,572 |
| In foreign currencies                                             | 2,507,034        | 4,053,320  |
|                                                                   | 164,001,533      | 89,505,892 |



## Notes To The Unconsolidated Financial Statements

For the year ended December 31, 2020

### 18. DEPOSITS AND OTHER ACCOUNTS

|                               | 2020              |                       |               | 2019              |                       |               |
|-------------------------------|-------------------|-----------------------|---------------|-------------------|-----------------------|---------------|
|                               | In Local currency | In Foreign currencies | Total         | In Local currency | In Foreign currencies | Total         |
| (Rupees in '000)              |                   |                       |               |                   |                       |               |
| <b>Customers</b>              |                   |                       |               |                   |                       |               |
| Current deposits              | 397,258,854       | 53,823,514            | 451,082,368   | 336,833,189       | 51,619,020            | 388,452,209   |
| Savings deposits              | 649,410,009       | 45,805,328            | 695,215,337   | 552,121,108       | 45,357,701            | 597,478,809   |
| Term deposits                 | 71,492,234        | 14,103,734            | 85,595,968    | 85,296,905        | 15,518,802            | 100,815,707   |
| Others                        | 23,319,545        | 3,218,232             | 26,537,777    | 21,537,429        | 2,854,010             | 24,391,439    |
|                               | 1,141,480,642     | 116,950,808           | 1,258,431,450 | 995,788,631       | 115,349,533           | 1,111,138,164 |
| <b>Financial Institutions</b> |                   |                       |               |                   |                       |               |
| Current deposits              | 10,885,621        | 659,092               | 11,544,713    | 9,421,664         | 2,093,098             | 11,514,762    |
| Savings deposits              | 14,068,212        | 115,935               | 14,184,147    | 13,005,530        | 26,432                | 13,031,962    |
| Term deposits                 | 1,030,968         | 4,090,613             | 5,121,581     | 1,143,468         | 7,741,444             | 8,884,912     |
| Others                        | -                 | 220,413               | 220,413       | -                 | 193,459               | 193,459       |
|                               | 25,984,801        | 5,086,053             | 31,070,854    | 23,570,662        | 10,054,433            | 33,625,095    |
|                               | 1,167,465,443     | 122,036,861           | 1,289,502,304 | 1,019,359,293     | 125,403,966           | 1,144,763,259 |

|             |                                       | 2020             | 2019          |
|-------------|---------------------------------------|------------------|---------------|
|             |                                       | (Rupees in '000) |               |
| <b>18.1</b> | Composition of deposits               |                  |               |
|             | - Individuals                         | 829,982,651      | 716,900,889   |
|             | - Government (Federal and Provincial) | 55,860,439       | 65,583,218    |
|             | - Public Sector Entities              | 82,241,309       | 52,680,247    |
|             | - Banking Companies                   | 4,909,064        | 9,205,676     |
|             | - Non-Banking Financial Institutions  | 26,161,790       | 24,419,419    |
|             | - Private Sector                      | 290,347,051      | 275,973,810   |
|             |                                       | 1,289,502,304    | 1,144,763,259 |

**18.2** Deposits and other accounts include deposits eligible to be covered under the Deposits Protection insurance arrangements amounting to Rs 895,879.416 million (2019: Rs 751,072.744 million).

# Notes To The Unconsolidated Financial Statements

For the year ended December 31, 2020

## 19. DEFERRED TAX LIABILITIES

|                                                   |                        | 2020                     |                      |                         |             |
|---------------------------------------------------|------------------------|--------------------------|----------------------|-------------------------|-------------|
| Note                                              | At January<br>01, 2020 | Recognised in<br>P&L A/C | Recognised in<br>OCI | At December<br>01, 2020 |             |
| (Rupees in '000)                                  |                        |                          |                      |                         |             |
| <b>Taxable Temporary Differences on</b>           |                        |                          |                      |                         |             |
| - Surplus on revaluation of fixed assets          | 23.1                   | 1,346,550                | (60,134)             | -                       | 1,286,416   |
| - Surplus on revaluation of<br>Non-banking assets | 23.2                   | 237,181                  | (2,570)              | 64,371                  | 298,982     |
| - Accelerated tax depreciation                    |                        | 1,754,097                | 96,692               | -                       | 1,850,789   |
| - Receivable from pension fund                    |                        | 1,261,793                | 119,428              | (201,659)               | 1,179,562   |
| - Business combination                            |                        | 705,218                  | -                    | -                       | 705,218     |
| - Surplus on revaluation of investments           | 23                     | 2,271,094                | -                    | 2,165,627               | 4,436,721   |
|                                                   |                        | 7,575,933                | 153,416              | 2,028,339               | 9,757,688   |
| <b>Deductible Temporary Differences on</b>        |                        |                          |                      |                         |             |
| - Provision against advances                      |                        | (1,725,288)              | (1,057,242)          | -                       | (2,782,530) |
| - Deficit on revaluation of investments           | 23                     | -                        | -                    | -                       | -           |
|                                                   |                        | (1,725,288)              | (1,057,242)          | -                       | (2,782,530) |
|                                                   |                        | 5,850,645                | (903,826)            | 2,028,339               | 6,975,158   |
|                                                   |                        | 2019                     |                      |                         |             |
| Note                                              | At January<br>01, 2019 | Recognised in<br>P&L A/C | Recognised in<br>OCI | At December<br>01, 2019 |             |
| (Rupees in '000)                                  |                        |                          |                      |                         |             |
| <b>Taxable Temporary Differences on</b>           |                        |                          |                      |                         |             |
| - Surplus on revaluation of fixed assets          | 23.1                   | 992,684                  | (28,759)             | 382,625                 | 1,346,550   |
| - Surplus on revaluation of<br>non-banking assets | 23.2                   | 168,305                  | (20,388)             | 89,264                  | 237,181     |
| - Accelerated tax depreciation                    |                        | 1,607,561                | 146,536              | -                       | 1,754,097   |
| - Receivable from pension fund                    |                        | 1,335,309                | 155,621              | (229,137)               | 1,261,793   |
| - Business combination                            |                        | 705,218                  | -                    | -                       | 705,218     |
| - Surplus on revaluation of investments           | 23                     | -                        | -                    | 2,271,094               | 2,271,094   |
|                                                   |                        | 4,809,077                | 253,010              | 2,513,846               | 7,575,933   |
| <b>Deductible Temporary Differences on</b>        |                        |                          |                      |                         |             |
| - Provision against advances                      |                        | (1,791,747)              | 66,459               | -                       | (1,725,288) |
| - Deficit on revaluation of investments           |                        | (1,485,153)              | -                    | 1,485,153               | -           |
|                                                   |                        | (3,276,900)              | 66,459               | 1,485,153               | (1,725,288) |
|                                                   |                        | 1,532,177                | 319,469              | 3,998,999               | 5,850,645   |

## Notes To The Unconsolidated Financial Statements

For the year ended December 31, 2020

|                                                           | Note | 2020<br>(Rupees in '000) | 2019              |
|-----------------------------------------------------------|------|--------------------------|-------------------|
| <b>20. OTHER LIABILITIES</b>                              |      |                          |                   |
| Mark-up/ return/ interest payable in local currency       |      | 2,272,650                | 22,831,727        |
| Mark-up/ return/ interest payable in foreign currencies   |      | 247,926                  | 649,536           |
| Unearned commission and income on bills discounted        |      | 212,337                  | 181,751           |
| Accrued expenses                                          |      | 5,898,224                | 5,397,614         |
| Provision for taxation ( provisions less payments)        |      | 10,185,375               | 6,130,846         |
| Workers' welfare fund                                     | 20.1 | 8,838,684                | 7,873,706         |
| Acceptances                                               | 14   | 20,030,754               | 18,152,032        |
| Unclaimed/dividend payable                                |      | 1,692,942                | 1,592,979         |
| Mark to market loss on forward foreign exchange contracts |      | 4,485,302                | 4,642,692         |
| Unrealized loss on derivative financial instruments       | 25   | 513,343                  | 1,232,806         |
| Staff welfare fund                                        |      | 5,598                    | 5,727             |
| Provision for employees' compensated absences             | 38.4 | 919,407                  | 939,495           |
| Provision for post retirement medical benefits            | 38.4 | 2,004,122                | 1,921,348         |
| Provision for employees' contributory benevolent scheme   | 38.4 | 222,084                  | 221,193           |
| Retention money                                           |      | 20,657                   | 20,657            |
| Insurance payable against consumer assets                 |      | 698,949                  | 655,146           |
| Unclaimed balances                                        |      | 877,552                  | 993,105           |
| Duties and taxes payable                                  |      | 1,846,580                | 753,674           |
| Provision against off-balance sheet obligations           |      | 46,189                   | 46,581            |
| Security deposits against lease                           |      | 499,089                  | 491,366           |
| Lease liability against right of use assets               |      | 8,035,048                | 8,295,864         |
| Others                                                    |      | 13,348,016               | 11,265,893        |
|                                                           |      | <b>82,900,828</b>        | <b>94,295,738</b> |

**20.1** Supreme Court of Pakistan vide its order dated November 10, 2016 has held that the amendments made in the law introduced by the Federal Government for the levy of Workers Welfare Fund were not lawful. The Federal Board of Revenue has filed review petitions against this order which are currently pending.

Legal advice obtained on the matter indicates that consequent to filing of these review petitions the judgment may not currently be treated as conclusive. Accordingly, the Bank maintained its provision in respect of WWF.

### 21. SHARE CAPITAL

#### 21.1 Authorized Capital

|  | 2020<br>(Number of shares) | 2019          |                                | 2020<br>(Rupees in '000) | 2019       |
|--|----------------------------|---------------|--------------------------------|--------------------------|------------|
|  | 1,500,000,000              | 1,500,000,000 | Ordinary shares of Rs. 10 each | 15,000,000               | 15,000,000 |

#### 21.2 Issued, subscribed and paid up

|  | 2020<br>(Number of shares) | 2019                 |                                          | 2020<br>(Rupees in '000) | 2019              |
|--|----------------------------|----------------------|------------------------------------------|--------------------------|-------------------|
|  |                            |                      | <b>Ordinary shares</b>                   |                          |                   |
|  | 197,253,795                | 197,253,795          | Fully paid in cash                       | 1,972,538                | 1,972,538         |
|  | 915,776,953                | 915,776,953          | Issued as bonus shares                   | 9,157,769                | 9,157,769         |
|  | 72,029,258                 | 72,029,258           | Issued for consideration other than cash | 720,293                  | 720,293           |
|  | <b>1,185,060,006</b>       | <b>1,185,060,006</b> |                                          | <b>11,850,600</b>        | <b>11,850,600</b> |

## Notes To The Unconsolidated Financial Statements

For the year ended December 31, 2020

**21.3** The movement in the issued, subscribed and paid-up capital during the year is as follows:

| 2020<br>(Number of shares) |               | 2019<br>(Number of shares)     |  | 2020<br>(Rupees in '000) |            | 2019<br>(Rupees in '000) |  |
|----------------------------|---------------|--------------------------------|--|--------------------------|------------|--------------------------|--|
| 1,185,060,006              | 1,185,060,006 | Opening balance at January 1   |  | 11,850,600               | 11,850,600 |                          |  |
| 1,185,060,006              | 1,185,060,006 | Closing balance at December 31 |  | 11,850,600               | 11,850,600 |                          |  |

**21.4** Number of shares held by the associated undertakings as at December 31, are as follows:

|                                                              | 2020<br>(Number of shares) | 2019<br>(Number of shares) |
|--------------------------------------------------------------|----------------------------|----------------------------|
| Adamjee Insurance Company Limited                            | 47,827,287                 | 47,827,287                 |
| Nishat Mills Limited                                         | 88,015,291                 | 88,015,291                 |
| Siddiqsons Limited                                           | 14,276,462                 | 14,276,462                 |
| Nishat (Aziz Avenue) Hotels and Properties Limited           | 141,950                    | 29,000                     |
| Nishat Real Estates Development Company<br>(Private) Limited | 54,500                     | –                          |
|                                                              | 150,315,490                | 150,148,040                |

|                                                                         | Note | 2020<br>(Rupees in '000) | 2019<br>(Rupees in '000) |
|-------------------------------------------------------------------------|------|--------------------------|--------------------------|
| <b>22. RESERVES</b>                                                     |      |                          |                          |
| Share premium                                                           |      | 23,751,114               | 23,751,114               |
| Non- distributable capital reserve - gain on<br>bargain purchase option | 22.1 | 908,317                  | 908,317                  |
| Exchange translation reserve                                            |      | 2,876,483                | 2,675,131                |
| Statutory reserve                                                       | 22.2 | 34,560,421               | 31,656,691               |
| General reserve                                                         |      | 18,600,000               | 18,600,000               |
|                                                                         |      | 80,696,335               | 77,591,253               |

**22.1** Under IFRS-3 a bargain purchase represents an economic gain which should be immediately recognized by the acquirer as income. However, the amount of bargain purchase gain was not taken to the profit and loss account as the SBP, through its letter BPRD(R&PD)/2017/14330 dated June 13, 2017 recommended that the amount of gain may be routed directly into equity as a Non-distributable Capital Reserve (NCR). The NCR may become available for distribution through a stock dividend only with prior approval of the SBP. The Bank, before distribution of the gain as a stock dividend, may adjust any subsequent provisions/deficit, assessed by the Bank or recommended by the Banking Inspection Department of SBP, in the acquired assets and liabilities of NIB Bank Limited against the NCR.

**22.2** Statutory reserve represents amount set aside as per the requirements of section 21 of the Banking Companies Ordinance, 1962.

# Notes To The Unconsolidated Financial Statements

For the year ended December 31, 2020

|                                                                                                                           | Note | 2020<br>(Rupees in '000) | 2019       |
|---------------------------------------------------------------------------------------------------------------------------|------|--------------------------|------------|
| <b>23. SURPLUS ON REVALUATION OF ASSETS</b>                                                                               |      |                          |            |
| Surplus on revaluation of                                                                                                 |      |                          |            |
| - Available for sale securities                                                                                           | 10.1 | 12,676,354               | 6,488,841  |
| - Fixed Assets                                                                                                            | 23.1 | 20,211,952               | 20,383,765 |
| - Non-banking assets acquired in satisfaction of claims                                                                   | 23.2 | 854,231                  | 677,660    |
|                                                                                                                           |      | 33,742,537               | 27,550,266 |
| Deferred tax on surplus on revaluation of:                                                                                |      |                          |            |
| - Available for sale securities                                                                                           | 19   | 4,436,721                | 2,271,094  |
| - Fixed Assets                                                                                                            | 23.1 | 1,286,416                | 1,346,550  |
| - Non-banking assets acquired in satisfaction of claims                                                                   | 23.2 | 298,982                  | 237,181    |
|                                                                                                                           |      | 6,022,119                | 3,854,825  |
|                                                                                                                           |      | 27,720,418               | 23,695,441 |
| <b>23.1 Surplus on revaluation of fixed assets</b>                                                                        |      |                          |            |
| Surplus on revaluation of fixed assets as at January 1                                                                    |      | 20,383,765               | 13,185,366 |
| Recognised during the year                                                                                                |      | -                        | 7,290,966  |
| Realised on disposal during the year - net of deferred tax                                                                |      | (22,544)                 | (10,560)   |
| Transferred to unappropriated profit in respect of incremental depreciation charged during the year - net of deferred tax |      | (89,135)                 | (53,248)   |
| Related deferred tax liability on incremental depreciation charged during the year                                        |      | (47,995)                 | (28,672)   |
| Related deferred tax liability on surplus realised on disposal                                                            |      | (12,139)                 | (87)       |
| Surplus on revaluation of fixed assets as at December 31                                                                  |      | 20,211,952               | 20,383,765 |
| Less: Related deferred tax liability on:                                                                                  |      |                          |            |
| - revaluation as at January 1                                                                                             |      | 1,346,550                | 992,684    |
| - recognised during the year                                                                                              |      | -                        | 382,625    |
| - surplus realised on disposal during the year                                                                            |      | (12,139)                 | (87)       |
| - incremental depreciation charged during the year                                                                        |      | (47,995)                 | (28,672)   |
|                                                                                                                           |      | 1,286,416                | 1,346,550  |
|                                                                                                                           |      | 18,925,536               | 19,037,215 |
| <b>23.2 Surplus on revaluation of non-banking assets acquired in satisfaction of claims</b>                               |      |                          |            |
| Surplus on revaluation as at January 1                                                                                    |      | 677,660                  | 480,871    |
| Recognised during the year                                                                                                |      | 183,915                  | 255,040    |
| Realised on disposal during the year - net of deferred tax                                                                |      | (4,774)                  | (37,863)   |
| Related deferred tax liability on surplus realised on disposal                                                            |      | (2,570)                  | (20,388)   |
| Surplus on revaluation as at December 31                                                                                  |      | 854,231                  | 677,660    |
| Less: Related deferred tax liability on:                                                                                  |      |                          |            |
| - revaluation as at January 1                                                                                             |      | 237,181                  | 168,305    |
| - revaluation recognised during the year                                                                                  |      | 64,371                   | 89,264     |
| - surplus realised on disposal during the year                                                                            |      | (2,570)                  | (20,388)   |
|                                                                                                                           |      | 298,982                  | 237,181    |
|                                                                                                                           |      | 555,249                  | 440,479    |

## Notes To The Unconsolidated Financial Statements

For the year ended December 31, 2020

|                                                                            | Note   | 2020<br>(Rupees in '000) | 2019        |
|----------------------------------------------------------------------------|--------|--------------------------|-------------|
| <b>24. CONTINGENCIES AND COMMITMENTS</b>                                   |        |                          |             |
| - Guarantees                                                               | 24.1   | 178,571,960              | 173,535,128 |
| - Commitments                                                              | 24.2   | 507,506,107              | 649,690,990 |
| - Other contingent liabilities                                             | 24.3   | 27,960,316               | 27,920,652  |
|                                                                            |        | 714,038,383              | 851,146,770 |
| <b>24.1 Guarantees:</b>                                                    |        |                          |             |
| Financial guarantees                                                       |        | 149,925,920              | 141,181,839 |
| Performance guarantees                                                     |        | 25,900,273               | 30,401,373  |
| Other guarantees                                                           |        | 2,745,767                | 1,951,916   |
|                                                                            |        | 178,571,960              | 173,535,128 |
| <b>24.2 Commitments:</b>                                                   |        |                          |             |
| Documentary credits and short-term trade-related transactions              |        |                          |             |
| - letters of credit                                                        |        | 172,617,563              | 145,217,983 |
| Commitments in respect of:                                                 |        |                          |             |
| - forward foreign exchange contracts                                       | 24.2.1 | 318,420,575              | 405,615,318 |
| - forward government securities transactions                               | 24.2.2 | 11,089,775               | 87,696,638  |
| - derivatives                                                              | 24.2.3 | 4,471,383                | 10,244,806  |
| Commitments for acquisition of:                                            |        |                          |             |
| - operating fixed assets                                                   |        | 710,570                  | 859,953     |
| - intangible assets                                                        |        | 196,241                  | 56,292      |
|                                                                            |        | 507,506,107              | 649,690,990 |
| <b>24.2.1 Commitments in respect of forward foreign exchange contracts</b> |        |                          |             |
| Purchase                                                                   |        | 168,432,858              | 217,809,539 |
| Sale                                                                       |        | 149,987,717              | 187,805,779 |
|                                                                            |        | 318,420,575              | 405,615,318 |
| <b>24.2.2 Commitments in respect of government securities transactions</b> |        |                          |             |
| Purchase                                                                   |        | 11,089,775               | 82,284,304  |
| Sale                                                                       |        | –                        | 5,412,334   |
|                                                                            |        | 11,089,775               | 87,696,638  |

## Notes To The Unconsolidated Financial Statements

For the year ended December 31, 2020

|                                                     | 2020             | 2019              |
|-----------------------------------------------------|------------------|-------------------|
|                                                     | (Rupees in '000) |                   |
| <b>24.2.3 Commitments in respect of derivatives</b> |                  |                   |
| FX options (notional)                               |                  |                   |
| Purchase                                            | 182,800          | 431,449           |
| Sale                                                | 182,800          | 431,449           |
|                                                     | 365,600          | 862,898           |
| Cross Currency Swaps (notional)                     |                  |                   |
| Purchase                                            | 1,975,311        | 4,428,663         |
| Sale                                                | 2,130,472        | 4,636,745         |
|                                                     | 4,105,783        | 9,065,408         |
| Interest Rate Swaps (notional)                      |                  |                   |
| Purchase                                            | –                | 316,500           |
| Sale                                                | –                | –                 |
|                                                     | –                | 316,500           |
|                                                     | <b>4,471,383</b> | <b>10,244,806</b> |

- 24.2.4** The Bank makes commitments to extend credit in the normal course of its business but these being revocable commitments do not attract any significant penalty or expense if the facility is unilaterally withdrawn.

|                                                   | Note   | 2020             | 2019       |
|---------------------------------------------------|--------|------------------|------------|
|                                                   |        | (Rupees in '000) |            |
| <b>24.3 Other contingent liabilities</b>          |        |                  |            |
| Claims against the Bank not acknowledged as debts | 24.3.1 | 27,960,316       | 27,920,652 |

- 24.3.1** These represent certain claims by third parties against the Bank, which are being contested in the Courts of law. The management is of the view that these relate to the normal course of business and the possibility of an outflow of economic resources is remote.

- 24.4** For assessment year 1988-89 through tax year 2019, the tax department disputed Bank's treatment on certain issues, where the Bank's appeals are pending at various appellate forums, entailing an additional tax liability of Rs. 6,033 million (2019: Rs. 1,487 million). Such issues inter alia principally include disallowance of expenses for non deduction of withholding tax and non availability of underlying records, provision for non performing loans, attribution of expenses to heads of income other than income from business and disallowance of credit for taxes paid in advance / deducted at source.

The Bank has filed appeals which are pending at various appellate forums. In addition, certain decisions made in favour of the Bank are being contested by the department at higher forums. No provision has been made in the financial statements regarding the aforesaid additional tax demand and already issued favourable decisions where the department is in appeal, as the management is of the view that the issues will be decided in the Bank's favour as and when these are taken up by the Appellate Authorities.

- 24.5 Amortisation of goodwill and other intangibles amounting to Rs 28.08 billion of Ex. NIB**

Issue of goodwill and other related assets amortization for few years has been assessed in Bank's favour at appellate forums during the year, however, the tax department has filed appeal against these decisions. The management has not recorded any tax benefit because the issue has not attained finality.

# Notes To The Unconsolidated Financial Statements

For the year ended December 31, 2020

## 25. DERIVATIVE INSTRUMENTS

### 25.1 Product Analysis

2020

|                                | Cross Currency Swaps |                          | Interest Rate Swaps |                          | Fx Option          |                          |
|--------------------------------|----------------------|--------------------------|---------------------|--------------------------|--------------------|--------------------------|
|                                | Notional principal   | Mark to market gain/loss | Notional principal  | Mark to market gain/loss | Notional principal | Mark to market gain/loss |
| (Rupees in '000)               |                      |                          |                     |                          |                    |                          |
| <b>Counterparties</b>          |                      |                          |                     |                          |                    |                          |
| <b>With Banks for</b>          |                      |                          |                     |                          |                    |                          |
| Hedging                        | 1,975,311            | 512,508                  | -                   | -                        | 182,800            | 4,525                    |
| Market Making                  | -                    | -                        | -                   | -                        | -                  | -                        |
| <b>With other entities for</b> |                      |                          |                     |                          |                    |                          |
| Hedging                        | -                    | -                        | -                   | -                        | -                  | -                        |
| Market Making                  | 2,130,472            | (508,818)                | -                   | -                        | 182,800            | (4,525)                  |
| <b>Total</b>                   |                      |                          |                     |                          |                    |                          |
| Hedging                        | 1,975,311            | 512,508                  | -                   | -                        | 182,800            | 4,525                    |
| Market Making                  | 2,130,472            | (508,818)                | -                   | -                        | 182,800            | (4,525)                  |

2019

|                                | Cross Currency Swaps |                          | Interest Rate Swaps |                          | Fx Option          |                          |
|--------------------------------|----------------------|--------------------------|---------------------|--------------------------|--------------------|--------------------------|
|                                | Notional principal   | Mark to market gain/loss | Notional principal  | Mark to market gain/loss | Notional principal | Mark to market gain/loss |
| (Rupees in '000)               |                      |                          |                     |                          |                    |                          |
| <b>Counterparties</b>          |                      |                          |                     |                          |                    |                          |
| <b>With Banks for</b>          |                      |                          |                     |                          |                    |                          |
| Hedging                        | 4,428,663            | 1,218,634                | 316,500             | 11,510                   | 431,449            | 2,683                    |
| Market Making                  | -                    | -                        | -                   | -                        | -                  | -                        |
| <b>With other entities for</b> |                      |                          |                     |                          |                    |                          |
| Hedging                        | -                    | -                        | -                   | -                        | -                  | -                        |
| Market Making                  | 4,636,745            | (1,226,433)              | -                   | -                        | 431,449            | (2,683)                  |
| <b>Total</b>                   |                      |                          |                     |                          |                    |                          |
| Hedging                        | 4,428,663            | 1,218,634                | 316,500             | 11,510                   | 431,449            | 2,683                    |
| Market Making                  | 4,636,745            | (1,226,433)              | -                   | -                        | 431,449            | (2,683)                  |



## Notes To The Unconsolidated Financial Statements

For the year ended December 31, 2020

### 25.2 Maturity Analysis

|                           | 2020             |                    |                  |                |              |
|---------------------------|------------------|--------------------|------------------|----------------|--------------|
|                           | No. of contracts | Notional principal | Mark to Market   |                |              |
|                           |                  |                    | Negative         | Positive       | Net          |
| (Rupees in '000)          |                  |                    |                  |                |              |
| <b>Remaining Maturity</b> |                  |                    |                  |                |              |
| Upto 1 month              | 8                | 924,787            | (54,638)         | 54,840         | 202          |
| 1 to 3 months             | 4                | 120,859            | (1,545)          | 1,545          | –            |
| 3 to 6 months             | 4                | 421,010            | (71,467)         | 71,915         | 448          |
| 6 month to 1 Year         | 3                | 329,626            | (23,640)         | 18,177         | (5,463)      |
| 1 to 2 Year               | 4                | 1,094,545          | (220,328)        | 226,567        | 6,239        |
| 2 to 3 Years              | 0                | –                  | –                | –              | –            |
| 3 to 5 Years              | 2                | 1,580,556          | (141,725)        | 143,989        | 2,264        |
| <b>Total</b>              | <b>25</b>        | <b>4,471,383</b>   | <b>(513,343)</b> | <b>517,033</b> | <b>3,690</b> |

  

|                           | 2019             |                    |                    |                  |              |
|---------------------------|------------------|--------------------|--------------------|------------------|--------------|
|                           | No. of contracts | Notional principal | Mark to Market     |                  |              |
|                           |                  |                    | Negative           | Positive         | Net          |
| (Rupees in '000)          |                  |                    |                    |                  |              |
| <b>Remaining Maturity</b> |                  |                    |                    |                  |              |
| Upto 1 month              | 14               | 409,597            | (518)              | 518              | –            |
| 1 to 3 months             | 32               | 1,076,111          | (154,368)          | 154,707          | 339          |
| 3 to 6 months             | 1                | 52,745             | (25,888)           | –                | (25,888)     |
| 6 month to 1 Year         | 7                | 1,847,480          | (298,299)          | 299,689          | 1,390        |
| 1 to 2 Year               | 9                | 3,199,475          | (312,482)          | 323,222          | 10,740       |
| 2 to 3 Years              | 4                | 1,714,098          | (340,100)          | 353,553          | 13,453       |
| 3 to 5 Years              | 2                | 1,945,300          | (101,151)          | 104,828          | 3,677        |
| <b>Total</b>              | <b>69</b>        | <b>10,244,806</b>  | <b>(1,232,806)</b> | <b>1,236,517</b> | <b>3,711</b> |

**25.3** Disclosure relating to qualitative and quantitative information on exchange traded derivatives are disclosed in note 45.5.

**25.4** Risk management related to derivatives is discussed in note 45.5.

|                                           | 2020               | 2019               |
|-------------------------------------------|--------------------|--------------------|
|                                           | (Rupees in '000)   |                    |
| <b>26. MARK-UP/RETURN/INTEREST EARNED</b> |                    |                    |
| Loans and advances                        | 42,879,345         | 57,329,597         |
| Investments                               | 91,983,471         | 75,481,025         |
| Lendings to financial institutions        | 998,236            | 4,982,470          |
| Balances with banks                       | 214,653            | 498,804            |
|                                           | <b>136,075,705</b> | <b>138,291,896</b> |

# Notes To The Unconsolidated Financial Statements

For the year ended December 31, 2020

|                                                                               | Note   | 2020<br>(Rupees in '000) | 2019<br>(Rupees in '000) |
|-------------------------------------------------------------------------------|--------|--------------------------|--------------------------|
| <b>27. MARK-UP/RETURN/INTEREST EXPENSED</b>                                   |        |                          |                          |
| Deposits                                                                      |        | 55,095,363               | 65,343,677               |
| Borrowings                                                                    |        | 6,152,383                | 8,977,118                |
| Subordinated debt                                                             |        | –                        | 213,604                  |
| Cost of foreign currency swaps against foreign currency deposits / borrowings |        | 2,386,644                | 3,009,184                |
| Unwinding cost of liability against right-of-use assets                       |        | 1,106,824                | 1,132,099                |
|                                                                               |        | <b>64,741,214</b>        | <b>78,675,682</b>        |
| <b>28. FEE &amp; COMMISSION INCOME</b>                                        |        |                          |                          |
| Branch banking customer fees                                                  |        | 1,914,132                | 1,810,293                |
| Consumer finance related fees                                                 |        | 420,289                  | 331,007                  |
| Card related fees (debit and credit cards)                                    |        | 3,130,966                | 3,065,534                |
| Credit related fees                                                           |        | 47,282                   | 183,688                  |
| Investment banking fee                                                        |        | 144,137                  | 168,748                  |
| Commission on trade                                                           |        | 1,277,171                | 1,406,051                |
| Commission on guarantees                                                      |        | 562,447                  | 584,369                  |
| Commission on cash management                                                 |        | 614,297                  | 602,605                  |
| Commission on remittances including home remittances                          |        | 1,010,735                | 1,172,359                |
| Commission on utility bills                                                   |        | 79,791                   | 106,320                  |
| Commission income - Bancassurance                                             |        | 1,329,986                | 1,432,878                |
| Rent on lockers                                                               |        | 216,420                  | 236,616                  |
| Commission on investments services                                            |        | 30,131                   | 56,360                   |
| Other Commission                                                              |        | 158,541                  | 131,222                  |
|                                                                               |        | <b>10,936,325</b>        | <b>11,288,050</b>        |
| <b>29. GAIN ON SECURITIES, NET</b>                                            |        |                          |                          |
| Realised                                                                      | 29.1   | 3,332,256                | 837,022                  |
| Unrealised - held for trading                                                 | 10.1   | (224)                    | (4,176)                  |
|                                                                               |        | <b>3,332,032</b>         | <b>832,846</b>           |
| <b>29.1</b> Realised gain on:                                                 |        |                          |                          |
| Federal Government Securities                                                 |        | 3,438,217                | 95,699                   |
| Subsidiary                                                                    |        | 72,194                   | (7,512)                  |
| Non Government Debt Securities                                                |        | (76,169)                 | –                        |
| Shares & units                                                                |        | (101,986)                | 748,835                  |
|                                                                               |        | <b>3,332,256</b>         | <b>837,022</b>           |
| <b>30. OTHER INCOME</b>                                                       |        |                          |                          |
| Rent on property                                                              |        | 67,310                   | 69,427                   |
| Gain on sale of fixed assets-net                                              |        | 72,601                   | 90,158                   |
| Loss on termination of lease liability against right of use assets            |        | (15,637)                 | –                        |
| Gain on sale of non banking assets - net                                      | 14.1.2 | 3,976                    | 111,948                  |
|                                                                               |        | <b>128,250</b>           | <b>271,533</b>           |

## Notes To The Unconsolidated Financial Statements

For the year ended December 31, 2020

|                                                                          | Note   | 2020<br>(Rupees in '000) | 2019       |
|--------------------------------------------------------------------------|--------|--------------------------|------------|
| <b>31. OPERATING EXPENSES</b>                                            |        |                          |            |
| <b>Total compensation expense</b>                                        | 31.1   | 15,805,510               | 14,585,179 |
| <b>Property expense</b>                                                  |        |                          |            |
| Rent and taxes                                                           |        | 160,642                  | 226,910    |
| Insurance                                                                |        | 23,197                   | 21,200     |
| Utilities cost                                                           |        | 1,218,168                | 1,203,064  |
| Fuel expense generators                                                  |        | 334,634                  | 534,428    |
| Security (including guards)                                              |        | 1,240,298                | 1,382,080  |
| Repair and maintenance (including janitorial charges)                    |        | 653,082                  | 811,653    |
| Depreciation on right-of-use assets                                      | 12.3   | 1,216,784                | 1,161,795  |
| Depreciation                                                             | 12.2   | 641,564                  | 504,153    |
|                                                                          |        | 5,488,369                | 5,845,283  |
| <b>Information technology expenses</b>                                   |        |                          |            |
| Software maintenance                                                     |        | 1,148,436                | 1,188,463  |
| Hardware maintenance                                                     |        | 212,381                  | 298,898    |
| Depreciation                                                             | 12.2   | 547,930                  | 615,598    |
| Amortisation                                                             | 13     | 318,024                  | 301,022    |
| Network charges                                                          |        | 598,380                  | 601,405    |
| Insurance                                                                |        | 3,850                    | 3,129      |
|                                                                          |        | 2,829,001                | 3,008,515  |
| <b>Other operating expenses</b>                                          |        |                          |            |
| Directors' fees and allowances                                           |        | 50,060                   | 57,479     |
| Legal and professional charges                                           |        | 268,451                  | 350,295    |
| Outsourced services costs                                                | 37.1   | 691,787                  | 690,391    |
| Travelling and conveyance                                                |        | 260,676                  | 321,448    |
| NIFT clearing charges                                                    |        | 166,175                  | 152,009    |
| Depreciation                                                             | 12.2   | 815,567                  | 796,895    |
| Depreciation on non-banking assets acquired<br>in satisfaction of claims | 14.1.1 | 30,049                   | 45,456     |
| Training and development                                                 |        | 36,791                   | 57,230     |
| Postage and courier charges                                              |        | 233,891                  | 303,262    |
| Communication                                                            |        | 326,441                  | 373,368    |
| Stationery and printing                                                  |        | 563,090                  | 639,343    |
| Marketing, advertisement & publicity                                     |        | 695,291                  | 625,463    |
| Donations                                                                | 31.2   | 112,596                  | 100        |
| Auditors' remuneration                                                   | 31.3   | 29,720                   | 29,944     |
| Cash transportation charges                                              |        | 709,262                  | 799,226    |
| Repair and maintenance                                                   |        | 401,826                  | 415,645    |
| Subscription                                                             |        | 20,637                   | 20,184     |
| Entertainment                                                            |        | 183,703                  | 231,549    |
| Remittance charges                                                       |        | 211,631                  | 197,223    |
| Brokerage expenses                                                       |        | 36,124                   | 32,561     |
| Card related expenses                                                    |        | 829,055                  | 1,182,346  |
| CNIC verification charges                                                |        | 128,614                  | 206,509    |
| Insurance                                                                |        | 1,483,323                | 1,440,525  |
| Others                                                                   |        | 238,142                  | 263,490    |
|                                                                          |        | 8,522,902                | 9,231,941  |
|                                                                          |        | 32,645,782               | 32,670,918 |

Total cost for the year included in other operating expenses relating to outsourced activities is Rs 275.517 million (2019: Rs 307.993 million) which pertains to payments made to companies incorporated in Pakistan. This includes payments other than outsourced services costs, which are disclosed above. Total Cost of outsourced activities for the year given to related parties is Rs 275.517 million (2019: Rs 258.190 million). Outsourcing shall have the same meaning as specified in BPRD Circular No. 06 of 2019.

## Notes To The Unconsolidated Financial Statements

For the year ended December 31, 2020

The Bank has material outsourcing arrangement with “Euronet Pakistan Private Limited” (a related party) for hosting of debit cards, prepaid cards, POS terminals and ATMs switch system. The annual cost of outsourcing is Rs 275.517 million (2019: 258.190 million).

|             | Note                                         | 2020<br>(Rupees in '000) | 2019              |
|-------------|----------------------------------------------|--------------------------|-------------------|
| <b>31.1</b> | <b>Total compensation expense</b>            |                          |                   |
|             | Fees and allowances                          | 470,085                  | 497,837           |
|             | Managerial remuneration                      |                          |                   |
|             | i) Fixed                                     | 11,514,132               | 10,928,504        |
|             | ii) Variable - cash bonus / awards           | 2,430,988                | 2,030,589         |
|             | Charge / (reversal) for defined benefit plan | 74,827                   | (101,509)         |
|             | Contribution to defined contribution plan    | 394,598                  | 366,744           |
|             | Commission                                   | 348,633                  | 330,812           |
|             | Staff group insurance                        | 386,388                  | 312,868           |
|             | Rent and house maintenance                   | 58,094                   | 56,205            |
|             | Medical                                      | 35,135                   | 35,516            |
|             | Conveyance                                   | 88,130                   | 89,913            |
|             | <b>Sub-total</b>                             | <b>15,801,010</b>        | <b>14,547,479</b> |
|             | Sign-on bonus                                | 3,700                    | 100               |
|             | Severance allowance                          | 800                      | 37,600            |
|             | <b>Grand Total</b>                           | <b>15,805,510</b>        | <b>14,585,179</b> |

**31.1.1** During the year sign on bonus was paid to 4 employees (2019: 1).

**31.1.2** Severance allowance pertains to 1 employee (2019: 6).

**31.2** Detail of donations made during the year is as follows:

|                                                                                                      | 2020<br>(Rupees in '000) | 2019       |
|------------------------------------------------------------------------------------------------------|--------------------------|------------|
| Murshid Hospital & Health Care Centre                                                                | –                        | 100        |
| Saleem Memorial Trust Hospital                                                                       | 95,000                   | –          |
| Specialized Healthcare and Medical Education<br>Department, Government of Punjab - (COVID 19 relief) | 9,996                    | –          |
| Jahandad Society For Community Development                                                           | 5,000                    | –          |
| District Administration Lahore - (COVID 19 relief)                                                   | 2,600                    | –          |
|                                                                                                      | <b>112,596</b>           | <b>100</b> |

**31.2.1** None of the directors, executives or their spouses had any interest in the donees, except for Mr. Yahya Saleem who is a director in the Saleem Memorial Trust Hospital.

|             | 2020<br>(Rupees in '000)                            | 2019          |
|-------------|-----------------------------------------------------|---------------|
| <b>31.3</b> | <b>Auditors' remuneration</b>                       |               |
|             | Audit fee                                           | 15,628        |
|             | Fee for audit of foreign branches                   | 9,905         |
|             | Special certifications and sundry advisory services | 348           |
|             | Sales tax                                           | 2,500         |
|             | Out-of-pocket expenses                              | 1,563         |
|             |                                                     | <b>29,944</b> |

## Notes To The Unconsolidated Financial Statements

For the year ended December 31, 2020

|                                                                    | Note   | 2020<br>(Rupees in '000) | 2019              |
|--------------------------------------------------------------------|--------|--------------------------|-------------------|
| <b>32. OTHER CHARGES</b>                                           |        |                          |                   |
| Penalties of State Bank of Pakistan                                |        | 191,766                  | 46,069            |
| VAT & National Building tax & Crop Insurance Levy                  |        | 92,502                   | 179,643           |
| Education cess                                                     |        | 13,129                   | 10,645            |
|                                                                    |        | <u>297,397</u>           | <u>236,357</u>    |
| <b>33. PROVISIONS / (REVERSALS) &amp; WRITE OFFS - NET</b>         |        |                          |                   |
| (Reversals) / provisions against balance with Banks                |        | (3,569)                  | (3,111)           |
| (Reversals) / provisions for diminution in value of investments    | 10.3.1 | (49,922)                 | 2,823,532         |
| (Reversals) / provisions against loans & advances                  | 11.4   | 7,521,701                | (157,616)         |
| (Reversals) / provisions against off balance sheet items           | 20     | (448)                    | 9,025             |
| Reversals against other assets                                     | 14.2.1 | (23,648)                 | (23,436)          |
| Recovery of written off / charged off bad debts                    |        | (130,948)                | (164,860)         |
|                                                                    |        | <u>7,313,166</u>         | <u>2,483,534</u>  |
| <b>34. TAXATION</b>                                                |        |                          |                   |
| Current                                                            |        | 20,115,480               | 15,355,566        |
| Prior years                                                        |        | -                        | 450,438           |
| Deferred                                                           | 19     | (903,826)                | 319,469           |
|                                                                    |        | <u>19,211,654</u>        | <u>16,125,473</u> |
| <b>34.1 Relationship between tax expense and accounting profit</b> |        |                          |                   |
| Accounting profit for the year                                     |        | 48,248,955               | 40,102,312        |
| Tax rate                                                           |        | 35%                      | 35%               |
| Tax on income                                                      |        | 16,887,134               | 14,035,809        |
| Tax effect of permanent differences                                |        | 67,118                   | 16,124            |
| Tax effect of prior years reversals                                |        | -                        | 450,438           |
| Others                                                             |        | 2,257,402                | 1,623,102         |
| Tax charge for the year                                            |        | <u>19,211,654</u>        | <u>16,125,473</u> |
|                                                                    |        | (Rupees in '000)         |                   |
| <b>35. BASIC AND DILUTED EARNINGS PER SHARE</b>                    |        |                          |                   |
| Profit for the year after tax                                      |        | 29,037,301               | 23,976,839        |
|                                                                    |        | (Number)                 |                   |
| Weighted average number of ordinary shares                         |        | 1,185,060,006            | 1,185,060,006     |
|                                                                    |        | (Rupees)                 |                   |
| Basic and diluted earnings per share                               |        | 24.50                    | 20.23             |

# Notes To The Unconsolidated Financial Statements

For the year ended December 31, 2020

|                                       | Note | 2020<br>(Rupees in '000) |             | 2019<br>(Rupees in '000) |      |
|---------------------------------------|------|--------------------------|-------------|--------------------------|------|
|                                       |      | 2020                     | 2019        | 2020                     | 2019 |
| <b>36. CASH AND CASH EQUIVALENTS</b>  |      |                          |             |                          |      |
| Cash and balances with treasury banks | 7    | 122,180,839              | 132,704,797 |                          |      |
| Balances with other banks             | 8    | 24,030,328               | 12,542,239  |                          |      |
| Overdrawn nostro accounts             | 17   | (397,313)                | (1,349,447) |                          |      |
|                                       |      | 145,813,854              | 143,897,589 |                          |      |

## 36.1 Reconciliation of liabilities to cash flows arising from financing activities

|                                                        | 2020               |                   |               |            |                       |              | 2019               |                   |               |            |                       |              |
|--------------------------------------------------------|--------------------|-------------------|---------------|------------|-----------------------|--------------|--------------------|-------------------|---------------|------------|-----------------------|--------------|
|                                                        | Liabilities        |                   |               | Equity     |                       |              | Liabilities        |                   |               | Equity     |                       |              |
|                                                        | Sub-ordinated loan | Other liabilities | Share capital | Reserves   | Unappropriated profit | Total        | Sub-ordinated loan | Other liabilities | Share capital | Reserves   | Unappropriated profit | Total        |
| <b>Balance as at January 01,</b>                       | -                  | 94,295,738        | 11,850,600    | 77,591,253 | 55,777,489            | 239,515,080  | 3,891,019          | 62,673,355        | 11,850,600    | 74,147,981 | 53,532,044            | 206,094,999  |
| Changes from Financing cash flows                      | -                  | -                 | -             | -          | -                     | -            | (3,891,019)        | -                 | -             | -          | -                     | (3,891,019)  |
| Redemption of Subordinated loan                        | -                  | -                 | -             | -          | -                     | -            | -                  | -                 | -             | -          | -                     | -            |
| Payment of lease liability against right-of-use-assets | -                  | (1,682,647)       | -             | -          | -                     | (1,682,647)  | -                  | (1,427,643)       | -             | -          | -                     | (1,427,643)  |
| Dividend paid                                          | -                  | -                 | -             | -          | (11,750,637)          | (11,750,637) | -                  | -                 | -             | -          | (18,838,387)          | (18,838,387) |
| Total changes from financing cash flows                | -                  | (1,682,647)       | -             | -          | (11,750,637)          | (13,433,284) | (3,891,019)        | (1,427,643)       | -             | -          | (18,838,387)          | (24,157,049) |
| <b>Liability related</b>                               |                    |                   |               |            |                       |              |                    |                   |               |            |                       |              |
| Changes in Other liabilities                           |                    |                   |               |            |                       |              |                    |                   |               |            |                       |              |
| - Cash based                                           | -                  | (18,498,355)      | -             | -          | -                     | (18,498,355) | -                  | 13,550,906        | -             | -          | -                     | 13,550,906   |
| - Dividend payable                                     | -                  | 99,963            | -             | -          | (99,963)              | -            | -                  | 122,573           | -             | -          | (122,573)             | -            |
| - Non cash based                                       | -                  | 8,686,129         | -             | -          | -                     | 8,686,129    | -                  | (19,376,547)      | -             | -          | -                     | (19,376,547) |
| Total liability related other changes                  | -                  | (9,712,263)       | -             | -          | (99,963)              | (9,812,226)  | -                  | 33,050,026        | -             | -          | (122,573)             | 32,927,453   |
| Total equity related other changes                     | -                  | -                 | -             | 3,105,082  | 25,907,713            | 29,012,795   | -                  | -                 | -             | 3,443,272  | 21,206,405            | 24,649,677   |
| Balance as at December 31                              | -                  | 82,900,828        | 11,850,600    | 80,696,335 | 69,834,602            | 245,282,365  | -                  | 94,295,738        | 11,850,600    | 77,591,253 | 55,777,489            | 239,515,080  |

## Notes To The Unconsolidated Financial Statements

For the year ended December 31, 2020

|                                              | 2020     | 2019   |
|----------------------------------------------|----------|--------|
|                                              | (Number) |        |
| <b>37. STAFF STRENGTH</b>                    |          |        |
| Permanent                                    | 13,536   | 13,480 |
| On Bank contract                             | 107      | 116    |
| Bank's own staff strength at end of the year | 13,643   | 13,596 |

**37.1** In addition to the above, 118 (2019: 157) employees of outsourcing services companies were assigned to the Bank as at the end of the year to perform services other than guarding, tea and janitorial services. Outsourced staff includes 111 (2019: 147) working domestically and 7 (2019: 10) working abroad.

### 38. DEFINED BENEFIT PLAN

#### 38.1 General description

The Bank operates the following retirement benefits for its employees:

- Pension fund - funded
- Benevolent scheme - unfunded
- Post retirement medical benefits - unfunded
- Employees compensated absence - unfunded

The plan assets and defined benefit obligations are based in Pakistan.

#### 38.2 Number of Employees under the scheme

The number of employees covered under the following defined benefit schemes are:

|                                               | 2020     | 2019   |
|-----------------------------------------------|----------|--------|
|                                               | (Number) |        |
| - Pension fund - funded                       | 5,410    | 6,294  |
| - Benevolent scheme - unfunded                | 1,108    | 1,692  |
| - Post retirement medical benefits - unfunded | 13,386   | 13,332 |
| - Employees compensated absence - unfunded    | 13,386   | 13,332 |

#### 38.3 Principal actuarial assumptions

The latest actuarial valuations of the pension fund, employees' contributory benevolent scheme, post retirement medical benefits and employee's compensated absences were carried out at December 31, 2020. The principal actuarial assumptions used are as follows:

|                                              | Approved Pension fund |       | Employees' contributory benevolent scheme |       | Post retirement medical benefits |       | Employees compensated absences |       |
|----------------------------------------------|-----------------------|-------|-------------------------------------------|-------|----------------------------------|-------|--------------------------------|-------|
|                                              | 2020                  | 2019  | 2020                                      | 2019  | 2020                             | 2019  | 2020                           | 2019  |
|                                              | (%)                   |       |                                           |       |                                  |       |                                |       |
| Discount rate                                | 9.75                  | 11.25 | 9.75                                      | 11.25 | 9.75                             | 11.25 | 9.75                           | 11.25 |
| Expected rate of return on plan assets       | 9.75                  | 11.25 | -                                         | -     | -                                | -     | -                              | -     |
| Expected rate of salary increase             | 7.75                  | 9.25  | 7.75                                      | 9.25  | -                                | -     | 7.75                           | 9.25  |
| Expected rate of increase in pension         | 0-5                   | 0-5   | -                                         | -     | -                                | -     | -                              | -     |
| Expected rate of increase in medical benefit | -                     | -     | -                                         | -     | 7.75                             | 9.25  | -                              | -     |

# Notes To The Unconsolidated Financial Statements

For the year ended December 31, 2020

## 38.4 Reconciliation of (receivable from) / payable to defined benefit plans

|                              | Approved Pension fund |             | Employees' contributory benevolent scheme |         | Post retirement medical benefits |           | Employees compensated absences |         |
|------------------------------|-----------------------|-------------|-------------------------------------------|---------|----------------------------------|-----------|--------------------------------|---------|
|                              | 2020                  | 2019        | 2020                                      | 2019    | 2020                             | 2019      | 2020                           | 2019    |
|                              | (Rupees in '000)      |             |                                           |         |                                  |           |                                |         |
| Present value of obligations | 5,097,744             | 5,182,991   | 222,084                                   | 221,193 | 2,004,122                        | 1,921,348 | 919,407                        | 939,495 |
| Fair value of plan assets    | (8,467,923)           | (8,788,112) | -                                         | -       | -                                | -         | -                              | -       |
| (Receivable) / payable       | (3,370,179)           | (3,605,121) | 222,084                                   | 221,193 | 2,004,122                        | 1,921,348 | 919,407                        | 939,495 |

## 38.5 Movement in defined benefit obligations

|                                          | Note   | Approved Pension fund |           | Employees' contributory benevolent scheme |          | Post retirement medical benefits |           | Employees compensated absences |           |
|------------------------------------------|--------|-----------------------|-----------|-------------------------------------------|----------|----------------------------------|-----------|--------------------------------|-----------|
|                                          |        | 2020                  | 2019      | 2020                                      | 2019     | 2020                             | 2019      | 2020                           | 2019      |
|                                          |        | (Rupees in '000)      |           |                                           |          |                                  |           |                                |           |
| Obligations at the beginning of the year |        | 5,182,991             | 4,690,587 | 221,193                                   | 214,252  | 1,921,348                        | 1,730,409 | 939,495                        | 1,028,129 |
| Current service cost                     | 38.8.1 | 64,350                | 60,879    | 21,742                                    | 22,341   | 53,018                           | 43,653    | 24,428                         | 24,740    |
| Interest cost                            |        | 560,303               | 592,985   | 22,931                                    | 26,035   | 208,381                          | 219,145   | 98,224                         | 128,046   |
| Benefits paid                            |        | (405,032)             | (430,453) | (34,721)                                  | (35,528) | (138,149)                        | (152,964) | (132,782)                      | (123,486) |
| Re-measurement loss / (gain)             | 38.8.2 | (304,868)             | 268,993   | (9,061)                                   | (5,907)  | (40,476)                         | 81,105    | (9,958)                        | (117,934) |
| Obligations at end of the year           |        | 5,097,744             | 5,182,991 | 222,084                                   | 221,193  | 2,004,122                        | 1,921,348 | 919,407                        | 939,495   |

## 38.6 Movement in fair value of plan assets

|                                         | Note   | Approved Pension fund |           | Employees' contributory benevolent scheme |      | Post retirement medical benefits |      | Employees compensated absences |      |
|-----------------------------------------|--------|-----------------------|-----------|-------------------------------------------|------|----------------------------------|------|--------------------------------|------|
|                                         |        | 2020                  | 2019      | 2020                                      | 2019 | 2020                             | 2019 | 2020                           | 2019 |
|                                         |        | (Rupees in '000)      |           |                                           |      |                                  |      |                                |      |
| Fair value at the beginning of the year |        | 8,788,112             | 8,505,757 | -                                         | -    | -                                | -    | -                              | -    |
| Interest income on plan assets          |        | 965,880               | 1,098,495 | -                                         | -    | -                                | -    | -                              | -    |
| Benefits paid                           |        | (405,032)             | (430,453) | -                                         | -    | -                                | -    | -                              | -    |
| Re-measurement loss                     | 38.8.2 | (881,037)             | (385,687) | -                                         | -    | -                                | -    | -                              | -    |
| Fair value at end of the year           |        | 8,467,923             | 8,788,112 | -                                         | -    | -                                | -    | -                              | -    |

## 38.7 Movement in (receivable) / payable under defined benefit schemes

|                                                                | Note   | Approved Pension fund |             | Employees' contributory benevolent scheme |          | Post retirement medical benefits |           | Employees compensated absences |           |
|----------------------------------------------------------------|--------|-----------------------|-------------|-------------------------------------------|----------|----------------------------------|-----------|--------------------------------|-----------|
|                                                                |        | 2020                  | 2019        | 2020                                      | 2019     | 2020                             | 2019      | 2020                           | 2019      |
|                                                                |        | (Rupees in '000)      |             |                                           |          |                                  |           |                                |           |
| Opening balance                                                |        | (3,605,121)           | (3,815,170) | 221,193                                   | 214,252  | 1,921,348                        | 1,730,409 | 939,495                        | 1,028,129 |
| Charge / (reversal) for the year                               | 38.8.1 | (341,227)             | (444,631)   | 41,961                                    | 45,472   | 261,399                          | 262,798   | 112,694                        | 34,852    |
| Employees' contribution                                        |        | -                     | -           | 2,712                                     | 2,904    | -                                | -         | -                              | -         |
| Re-measurement loss / (gain) recognised in OCI during the year | 38.8.2 | 576,169               | 654,680     | (9,061)                                   | (5,907)  | (40,476)                         | 81,105    | -                              | -         |
| Benefits paid by the Bank                                      |        | -                     | -           | (34,721)                                  | (35,528) | (138,149)                        | (152,964) | (132,782)                      | (123,486) |
| Closing balance                                                |        | (3,370,179)           | (3,605,121) | 222,084                                   | 221,193  | 2,004,122                        | 1,921,348 | 919,407                        | 939,495   |



## Notes To The Unconsolidated Financial Statements

For the year ended December 31, 2020

### 38.8 Charge for defined benefit plans

#### 38.8.1 Cost recognised in profit and loss

|                                                   | Approved Pension fund |           | Employees' contributory benevolent scheme |         | Post retirement medical benefits |         | Employees compensated absences |           |
|---------------------------------------------------|-----------------------|-----------|-------------------------------------------|---------|----------------------------------|---------|--------------------------------|-----------|
|                                                   | 2020                  | 2019      | 2020                                      | 2019    | 2020                             | 2019    | 2020                           | 2019      |
|                                                   | (Rupees in '000)      |           |                                           |         |                                  |         |                                |           |
| Current service cost                              | 64,350                | 60,879    | 21,742                                    | 22,341  | 53,018                           | 43,653  | 24,428                         | 24,740    |
| Net interest on defined benefit asset / liability | (405,577)             | (505,510) | 22,931                                    | 26,035  | 208,381                          | 219,145 | 98,224                         | 128,046   |
| Employees' contribution                           | -                     | -         | (2,712)                                   | (2,904) | -                                | -       | -                              | -         |
| Actuarial (gain)                                  | -                     | -         | -                                         | -       | -                                | -       | (9,958)                        | (117,934) |
|                                                   | (341,227)             | (444,631) | 41,961                                    | 45,472  | 261,399                          | 262,798 | 112,694                        | 34,852    |

#### 38.8.2 Re-measurements recognised in OCI during the year

|                                                            | Approved Pension fund |         | Employees' contributory benevolent scheme |         | Post retirement medical benefits |        | Employees compensated absences |      |
|------------------------------------------------------------|-----------------------|---------|-------------------------------------------|---------|----------------------------------|--------|--------------------------------|------|
|                                                            | 2020                  | 2019    | 2020                                      | 2019    | 2020                             | 2019   | 2020                           | 2019 |
|                                                            | (Rupees in '000)      |         |                                           |         |                                  |        |                                |      |
| Loss / (gain) on obligation - financial assumptions        | (304,868)             | 268,993 | (9,061)                                   | (5,907) | (40,476)                         | 81,105 | -                              | -    |
| Actual return on plan assets over expected interest income | 881,037               | 385,687 | -                                         | -       | -                                | -      | -                              | -    |
| Re-measurement loss / (gain) recognised in OCI             | 576,169               | 654,680 | (9,061)                                   | (5,907) | (40,476)                         | 81,105 | -                              | -    |

### 38.9 Components of plan assets

|                                 | Approved Pension fund |           | Employees' contributory benevolent scheme |      | Post retirement medical benefits |      | Employees compensated absences |      |
|---------------------------------|-----------------------|-----------|-------------------------------------------|------|----------------------------------|------|--------------------------------|------|
|                                 | 2020                  | 2019      | 2020                                      | 2019 | 2020                             | 2019 | 2020                           | 2019 |
|                                 | (Rupees in '000)      |           |                                           |      |                                  |      |                                |      |
| Cash and cash equivalents - net | 24,451                | 107,344   | -                                         | -    | -                                | -    | -                              | -    |
| Shares                          | 8,129,575             | 8,387,473 | -                                         | -    | -                                | -    | -                              | -    |
| Open ended mutual funds units   | 313,897               | 293,295   | -                                         | -    | -                                | -    | -                              | -    |
|                                 | 8,467,923             | 8,788,112 | -                                         | -    | -                                | -    | -                              | -    |

#### 38.9.1 Significant risk associated with the plan assets

The Fund's investments in equity securities and units of mutual funds are subject to price risk. These risks are regularly monitored by Trustees of the employee funds.

# Notes To The Unconsolidated Financial Statements

For the year ended December 31, 2020

## 38.10 Sensitivity analysis

Sensitivity analysis has been performed by varying one assumption keeping all other assumptions constant and calculating the impact on the present value of the defined benefit obligations under the various employee benefit schemes. The increase / (decrease) in the present value of defined benefit obligations as a result of change in each assumption is summarized below:

|                                                          | Approved Pension fund | Employees' contributory benevolent scheme | Post retirement medical benefits | Employees compensated absences |
|----------------------------------------------------------|-----------------------|-------------------------------------------|----------------------------------|--------------------------------|
|                                                          | (Rupees in '000)      |                                           |                                  |                                |
| 1% increase in discount rate                             | (337,220)             | (16,983)                                  | (222,612)                        | (56,543)                       |
| 1% decrease in discount rate                             | 384,510               | 19,474                                    | 275,965                          | 62,843                         |
| 1 % increase in expected rate of salary increase         | 78,500                | –                                         | –                                | 63,453                         |
| 1 % decrease in expected rate of salary increase         | (73,370)              | –                                         | –                                | (58,050)                       |
| 1% increase in expected rate of pension increase         | 282,140               | –                                         | –                                | –                              |
| 1% decrease in expected rate of pension increase         | (252,260)             | –                                         | –                                | –                              |
| 1% increase in expected rate of medical benefit increase | –                     | –                                         | 144,805                          | –                              |
| 1% decrease in expected rate of medical benefit increase | –                     | –                                         | (123,190)                        | –                              |

## 38.11 Expected contributions to be paid to the funds in the next financial year

No contributions are being made to pension fund due to surplus of fair value of plan's assets over present value of defined obligation. No contribution to the pension fund is expected in the next year.

## 38.12 Expected charge / (reversal) for the next financial year

Based on actuarial advice, management estimates that the charge / (reversal) in respect of defined benefit plans for the year ending December 31, 2021 would be as follows:

|                                                            | Approved Pension fund | Employees' contributory benevolent scheme | Post retirement medical benefits | Employees compensated absences |
|------------------------------------------------------------|-----------------------|-------------------------------------------|----------------------------------|--------------------------------|
|                                                            | (Rupees in '000)      |                                           |                                  |                                |
| Expected charge / (reversal) for the next financial year   | (265,940)             | 38,232                                    | 257,380                          | 114,262                        |
| 38.13 Maturity profile                                     |                       |                                           |                                  |                                |
| The weighted average duration of the obligation (in years) | 8.34                  | 8.34                                      | 8.34                             | 8.34                           |

## 38.14 Funding Policy

The Bank endeavours to ensure that liabilities under the various employee benefit schemes are covered by the Fund on any valuation date having regards to the various actuarial assumptions such as projected future salary increase, expected future contributions to the fund, projected increase in liability associated with future service and the projected investment income of the Fund.

## Notes To The Unconsolidated Financial Statements

For the year ended December 31, 2020

**38.15** The defined benefit plans may expose the bank to actuarial risks such as longevity risk, investment risk, salary increase risk and withdrawal rate risk as described below;

|                             |                                                                                                                                                                                                               |
|-----------------------------|---------------------------------------------------------------------------------------------------------------------------------------------------------------------------------------------------------------|
| <b>Investment risk</b>      | The risk arises when the actual performance of the investments is lower than expectation and thus creating a shortfall in the funding objectives.                                                             |
| <b>Longevity risk</b>       | The risk arises when the actual lifetime of retirees is longer than expectation. This risk is measured at the plan level over the entire retiree population.                                                  |
| <b>Salary increase risk</b> | The most common type of retirement benefit is one where the benefit is linked with final salary. The risk arises when the actual increases are higher than expectation and impacts the liability accordingly. |
| <b>Withdrawal rate</b>      | The risk of actual withdrawals varying with the actuarial assumptions can impose a risk to the benefit obligation. The movement of the liability can go either way.                                           |

### 39. DEFINED CONTRIBUTION PLAN

The Bank operates an approved contributory provident fund for 11,458 (2019: 11,056) employees where contributions are made by the Bank at 8.33% (2019: 8.33%) and employees ranging from 8.33% to 15% per annum (2019: 8.33% to 15% per annum) of the basic salary.

The Bank also operates an approved non-contributory provident fund for 687 (2019: 745) employees who have opted for the new scheme, where contributions are made by the employees ranging from 8.33% to 15% per annum (2019: 8.33% to 15% per annum) of the basic salary.

### 40. COMPENSATION OF DIRECTORS AND KEY MANAGEMENT PERSONNEL

#### 40.1. Total compensation expense

|                                           |        | 2020             |                                  |                  |                   |                         |                             |
|-------------------------------------------|--------|------------------|----------------------------------|------------------|-------------------|-------------------------|-----------------------------|
|                                           |        | Directors        |                                  |                  | Key               |                         | Other material              |
|                                           |        | Chairman         | Executive<br>(other than<br>CEO) | Non<br>executive | President/<br>CEO | management<br>personnel | risk takers/<br>controllers |
| Note                                      |        | (Rupees in '000) |                                  |                  |                   |                         |                             |
| Fee and allowances                        | 40.2   | 7,210            | -                                | 42,850           | -                 | 112                     | 10,111                      |
| Managerial Remuneration                   |        |                  |                                  |                  |                   |                         |                             |
| i) Fixed                                  |        | -                | -                                | -                | 72,362            | 301,222                 | 684,109                     |
| ii) Cash Bonus / Awards                   | 40.1.1 | -                | -                                | -                | 50,000            | 144,349                 | 218,954                     |
| Contribution to defined contribution plan |        | -                | -                                | -                | -                 | 8,317                   | 25,756                      |
| Rent & house maintenance                  |        | -                | -                                | -                | 240               | 15,736                  | 10,948                      |
| Medical                                   |        | -                | -                                | -                | 1,828             | 1,281                   | 5,694                       |
| Severance allowance                       |        | -                | -                                | -                | -                 | 800                     | -                           |
| Overseas allowance                        |        | -                | -                                | -                | -                 | 37,559                  | -                           |
| Security                                  |        | -                | -                                | -                | 804               | -                       | -                           |
| Commission                                |        | -                | -                                | -                | -                 | 300                     | 43,407                      |
| Club membership                           |        | -                | -                                | -                | 1,872             | -                       | 300                         |
| <b>Total</b>                              |        | <b>7,210</b>     | <b>-</b>                         | <b>42,850</b>    | <b>127,106</b>    | <b>509,676</b>          | <b>999,279</b>              |
| Number of Persons                         |        | 1                | -                                | 11               | 1                 | 23                      | 124                         |

# Notes To The Unconsolidated Financial Statements

For the year ended December 31, 2020

2019

|                                           | Directors     |                                  |                  | President/<br>CEO | Key<br>management<br>personnel | Other material<br>risk takers/<br>controllers |
|-------------------------------------------|---------------|----------------------------------|------------------|-------------------|--------------------------------|-----------------------------------------------|
|                                           | Chairman      | Executive<br>(other than<br>CEO) | Non<br>executive |                   |                                |                                               |
| (Rupees in '000)                          |               |                                  |                  |                   |                                |                                               |
| Fee and allowances                        | 25,000        | -                                | 32,479           | -                 | 672                            | 4,458                                         |
| Managerial Remuneration                   |               |                                  |                  |                   |                                |                                               |
| i) Fixed                                  | -             | -                                | -                | 63,046            | 293,751                        | 443,330                                       |
| ii) Cash Bonus / Awards                   | -             | -                                | -                | 40,000            | 137,134                        | 135,427                                       |
| Contribution to defined contribution plan | -             | -                                | -                | 2,484             | 8,495                          | 16,232                                        |
| Rent & house maintenance                  | -             | -                                | -                | 240               | 15,350                         | 7,894                                         |
| Medical                                   | -             | -                                | -                | 1,071             | 1,262                          | 4,319                                         |
| Severance allowance                       | -             | -                                | -                | -                 | 18,500                         | 8,800                                         |
| Overseas allowance                        | -             | -                                | -                | -                 | 38,947                         | 7,416                                         |
| Security                                  | -             | -                                | -                | 1,189             | -                              | -                                             |
| Commission                                | -             | -                                | -                | -                 | 57                             | 14,471                                        |
| Club membership                           | -             | -                                | -                | 70                | -                              | 2,160                                         |
| <b>Total</b>                              | <b>25,000</b> | <b>-</b>                         | <b>32,479</b>    | <b>108,100</b>    | <b>514,168</b>                 | <b>644,507</b>                                |
| Number of Persons                         | 1             | -                                | 12               | 1                 | 23                             | 75                                            |

**40.1.1** During the year 2020, Rs 20.6 million bonus has been deferred.

**40.2** Remuneration paid to Directors for participation in Board and Committee meetings

2020

|                             | For Board Committee           |                               |              |              |              |              |              |            |            |                       |               |
|-----------------------------|-------------------------------|-------------------------------|--------------|--------------|--------------|--------------|--------------|------------|------------|-----------------------|---------------|
|                             | Board<br>meeting<br>Committee | Board's<br>Audit<br>Committee | BS &<br>DC   | RM &<br>PRC  | HR &<br>RC   | ITC          | PP &<br>CA   | CR &<br>MC | Wo &<br>WC | *As Board<br>Chairman | Total         |
| (Rupees in '000)            |                               |                               |              |              |              |              |              |            |            |                       |               |
| Mian Mohammad Mansha        | 3,840                         | -                             | 300          | -            | 300          | -            | 400          | -          | -          | 2,370                 | 7,210         |
| Mr. S. M. Muneer            | 1,700                         | -                             | 100          | -            | -            | -            | -            | 100        | -          | -                     | 1,900         |
| Mr. Tariq Rafi              | 1,700                         | -                             | -            | -            | -            | -            | -            | -          | 200        | -                     | 1,900         |
| Mian Umer Mansha            | 1,700                         | 500                           | 400          | 500          | -            | 500          | 400          | -          | 300        | -                     | 4,300         |
| Mrs. Iqraa Hassan Mansha    | 1,200                         | -                             | -            | -            | 200          | -            | 100          | -          | -          | -                     | 1,500         |
| Mr. Muhammad Ali Zeb        | 1,700                         | 500                           | -            | 500          | 300          | -            | 300          | 400        | 300        | -                     | 4,000         |
| Mr. Mohd Suhail Amar Suresh | 4,460                         | -                             | 400          | 500          | -            | 500          | -            | -          | -          | -                     | 5,860         |
| Mr. Yahya Saleem            | 4,466                         | -                             | -            | -            | 300          | 200          | -            | -          | -          | -                     | 4,966         |
| Mr. Salman Khalid Butt      | 4,586                         | -                             | 400          | 500          | -            | 500          | -            | 400        | -          | -                     | 6,386         |
| Mr. Masood Ahmed Puri       | 4,466                         | -                             | 400          | -            | -            | -            | -            | -          | -          | -                     | 4,866         |
| Mr. Shahzad Hussain         | 1,700                         | 500                           | -            | -            | -            | -            | -            | -          | -          | -                     | 2,200         |
| Mr. Shariffuddin Bin Khalid | 4,472                         | 500                           | -            | -            | -            | -            | -            | -          | -          | -                     | 4,972         |
| <b>Total</b>                | <b>35,990</b>                 | <b>2,000</b>                  | <b>2,000</b> | <b>2,000</b> | <b>1,100</b> | <b>1,700</b> | <b>1,200</b> | <b>900</b> | <b>800</b> | <b>2,370</b>          | <b>50,060</b> |

# Notes To The Unconsolidated Financial Statements

For the year ended December 31, 2020

| 2019                        |                         |         |          |         |     |         |         |         |                    |        |        |
|-----------------------------|-------------------------|---------|----------|---------|-----|---------|---------|---------|--------------------|--------|--------|
| For Board Committee         |                         |         |          |         |     |         |         |         |                    |        |        |
| Board meeting               | Board's Audit Committee | BS & DC | RM & PRC | HR & RC | ITC | PP & CA | CR & MC | Wo & WC | *As Board Chairman | Total  |        |
| (Rupees in '000)            |                         |         |          |         |     |         |         |         |                    |        |        |
| Mian Mohammad Mansha        | -                       | -       | -        | -       | -   | -       | -       | -       | 25,000             | 25,000 |        |
| Mr. S. M. Muneer            | 130                     | -       | 30       | -       | -   | -       | -       | 30      | -                  | 190    |        |
| Mr. Tariq Rafi              | 430                     | -       | -        | -       | -   | -       | -       | -       | -                  | 430    |        |
| Mian Umer Mansha            | 300                     | 330     | 330      | 300     | -   | 330     | 330     | -       | -                  | 1,920  |        |
| Mrs. Iqraa Hassan Mansha    | 230                     | -       | -        | -       | -   | -       | -       | -       | -                  | 230    |        |
| Mr. Muhammad Ali Zeb        | 330                     | 330     | -        | 230     | 330 | -       | 300     | 330     | -                  | 1,850  |        |
| Mr. Mohd Suhail Amar Suresh | 4,620                   | -       | 230      | 230     | -   | 230     | -       | -       | -                  | 5,310  |        |
| Mr. Yahya Saleem            | 4,710                   | -       | -        | -       | 130 | 200     | -       | -       | -                  | 5,040  |        |
| Mr. Salman Khalid Butt      | 5,814                   | -       | 330      | 230     | -   | 330     | -       | 300     | -                  | 7,004  |        |
| Mr. Masood Ahmed Puri       | 3,503                   | -       | 200      | -       | -   | -       | -       | -       | -                  | 3,703  |        |
| Mr. Shahzad Hussain         | 300                     | 300     | -        | -       | -   | -       | -       | -       | -                  | 600    |        |
| Mr. Shariffuddin Bin Khalid | 3,504                   | 300     | -        | -       | -   | -       | -       | -       | -                  | 3,804  |        |
| Mr. Nor Hizam Bin Hashim    | 2,268                   | 130     | -        | -       | -   | -       | -       | -       | -                  | 2,398  |        |
|                             | 26,139                  | 1,390   | 1,120    | 990     | 460 | 1,090   | 630     | 660     | -                  | 25,000 | 57,479 |

\*During the year, the Board Chairman was paid proportionate amount of Rs 2.370 million in lieu of fixed annual remuneration (2019: Rs. 25 million) approved by the shareholders of the Bank in its 62nd Annual General Meeting held on March 26, 2010. Effective from February 05, 2020 in accordance with BPRD Circular No. 03 of 2019 dated August 19, 2019, the remuneration to the Chairman for attending the Board and committee meetings was paid inline with the remuneration scale approved by the shareholders of the Bank in its 72nd Annual General Meeting held on March 19, 2020.

**40.3** The Chairman has been provided with free use of the Bank maintained car. In addition to the above, the Chief Executive and certain executives are provided with free use of the Bank's maintained cars and household equipment in accordance with the terms of their employment.

## 41. FAIR VALUE MEASUREMENTS

The fair value of traded investments is based on quoted market prices, except for tradable securities classified by the Bank as 'held to maturity'. Quoted securities classified as held to maturity are carried at amortised cost. Fair value of unquoted equity investments other than investments in associates and subsidiaries is determined on the basis of break up value of these investments as per the latest available financial statements.

Fair value of fixed term loans, other assets, other liabilities, fixed term deposits and borrowings cannot be calculated with sufficient reliability due to absence of current and active market for such assets and liabilities and reliable data regarding market rates for similar instruments. The provision for impairment of loans and advances has been calculated in accordance with the Bank's accounting policy as stated in note 6.4 to these unconsolidated financial statements.

The maturity and repricing profile and effective rates are stated in note 45.

In the opinion of the management, the fair value of the financial assets and financial liabilities other than those carried at fair value and disclosed in note 41.1 are not significantly different from their carrying values since assets and liabilities are either short-term in nature or re-priced over short term.

# Notes To The Unconsolidated Financial Statements

For the year ended December 31, 2020

## 41.1 Fair value of financial assets

The Bank measures fair values using the following fair value hierarchy that reflects the significance of the inputs used in making the measurements:

**Level 1:** Fair value measurements using quoted prices (unadjusted) in active markets for identical assets or liabilities.

**Level 2:** Fair value measurements using inputs other than quoted prices included within Level 1 that are observable for the assets or liability, either directly (i.e. as prices) or indirectly (i.e. derived from prices).

**Level 3:** Fair value measurements using input for the asset or liability that are not based on observable market data (i.e. unobservable inputs).

### Valuation techniques used in determination of fair valuation of financial instruments within level 2

| Item                                             | Valuation approach and input used                                                                                                                                                                                                                                                                                                                                                                                      |
|--------------------------------------------------|------------------------------------------------------------------------------------------------------------------------------------------------------------------------------------------------------------------------------------------------------------------------------------------------------------------------------------------------------------------------------------------------------------------------|
| Federal Government securities                    | The fair values of Federal Government securities are determined using the PKRV rates.                                                                                                                                                                                                                                                                                                                                  |
| Term Finance and Bonds                           | Investments in debt securities (comprising term finance certificates, bonds and any other security issued by a company or a body corporate for the purpose of raising funds in the form of redeemable capital) are valued on the basis of the rates announced by the Mutual Funds Association of Pakistan (MUFAP) in accordance with the methodology prescribed by the Securities and Exchange Commission of Pakistan. |
| Foreign exchange contracts                       | The valuation has been determined by interpolating the mid rates announced by the State Bank of Pakistan.                                                                                                                                                                                                                                                                                                              |
| Derivatives                                      | The fair values of derivatives which are not quoted in active markets are determined by using valuation techniques. The valuation techniques take into account the relevant underlying parameters including foreign currency involved, interest rates, yield curves, volatilities, contracts duration etc.                                                                                                             |
| Operating fixed assets (land and building) & NBA | Land and buildings are revalued every three years using professional valuers on the panel of Pakistan Banker's Association. The valuation is based on their assessment of market value of the properties.                                                                                                                                                                                                              |

The table below analyses the financial and non-financial assets carried at fair values, by valuation methods. For financial assets, the Bank essentially carries its investments in debt and equity securities at fair values. Valuation of investments is carried out as per guidelines specified by the SBP. In case of non-financial assets, the Bank has adopted revaluation model (as per IAS 16) in respect of land and building.

# Notes To The Unconsolidated Financial Statements

For the year ended December 31, 2020

|                                                                          | 2020             |            |             |         | Total       |
|--------------------------------------------------------------------------|------------------|------------|-------------|---------|-------------|
|                                                                          | Carrying value   | Level 1    | Level 2     | Level 3 |             |
|                                                                          | (Rupees in '000) |            |             |         |             |
| <b>On balance sheet financial instruments</b>                            |                  |            |             |         |             |
| <b>Financial assets - measured at fair value</b>                         |                  |            |             |         |             |
| Investments                                                              |                  |            |             |         |             |
| Federal Government Securities                                            | 957,482,754      | -          | 957,482,754 | -       | 957,482,754 |
| Shares                                                                   | 18,171,840       | 18,171,840 | -           | -       | 18,171,840  |
| Non-Government Debt Securities                                           | 1,800,092        | -          | 1,800,092   | -       | 1,800,092   |
| Foreign Securities                                                       | 7,474,188        | -          | 7,474,188   | -       | 7,474,188   |
| <b>Financial assets - disclosed but not measured at fair value</b>       |                  |            |             |         |             |
| Investments (HTM, unlisted ordinary shares, subsidiaries and associates) | 30,940,574       | -          | -           | -       | -           |
| Cash and balances with treasury banks                                    | 122,180,839      | -          | -           | -       | -           |
| Balances with other banks                                                | 24,030,328       | -          | -           | -       | -           |
| Lendings to financial institutions                                       | 17,139,453       | -          | -           | -       | -           |
| Advances                                                                 | 462,941,787      | -          | -           | -       | -           |
| Other assets                                                             | 46,267,752       | -          | -           | -       | -           |
| <b>Non - Financial Assets measured at fair value</b>                     |                  |            |             |         |             |
| Operating fixed assets (land and buildings)                              | 44,275,487       | -          | 44,275,487  | -       | 44,275,487  |
| Non-banking assets                                                       | 4,036,914        | -          | 4,036,914   | -       | 4,036,914   |
| <b>Off-balance sheet financial instruments - measured at fair value</b>  |                  |            |             |         |             |
| Forward purchase of foreign exchange                                     | 168,432,858      | -          | 3,902,198   | -       | 3,902,198   |
| Forward sale of foreign exchange                                         | 149,987,717      | -          | 4,271,423   | -       | 4,271,423   |
| Derivatives purchase                                                     | 2,158,111        | -          | 517,033     | -       | 517,033     |
| Derivatives sale                                                         | 2,313,272        | -          | 513,343     | -       | 513,343     |

# Notes To The Unconsolidated Financial Statements

For the year ended December 31, 2020

|                                                                          | 2019           |            |             |         | Total       |
|--------------------------------------------------------------------------|----------------|------------|-------------|---------|-------------|
|                                                                          | Carrying value | Level 1    | Level 2     | Level 3 |             |
| (Rupees in '000)                                                         |                |            |             |         |             |
| <b>On balance sheet financial instruments</b>                            |                |            |             |         |             |
| <b>Financial assets - measured at fair value</b>                         |                |            |             |         |             |
| Investments                                                              |                |            |             |         |             |
| Federal Government Securities                                            | 680,585,359    | -          | 680,585,359 | -       | 680,585,359 |
| Shares                                                                   | 14,912,747     | 14,912,747 | -           | -       | 14,912,747  |
| Non-Government Debt Securities                                           | 1,306,414      | -          | 1,306,414   | -       | 1,306,414   |
| Foreign Securities                                                       | 3,663,065      | -          | 3,663,065   | -       | 3,663,065   |
| <b>Financial assets - disclosed but not measured at fair value</b>       |                |            |             |         |             |
| Investments (HTM, unlisted ordinary shares, subsidiaries and associates) | 48,296,917     | -          | -           | -       | -           |
| Cash and balances with treasury banks                                    | 132,704,797    | -          | -           | -       | -           |
| Balances with other banks                                                | 12,542,239     | -          | -           | -       | -           |
| Lendings to financial institutions                                       | 1,090,058      | -          | -           | -       | -           |
| Advances                                                                 | 496,678,874    | -          | -           | -       | -           |
| Other assets                                                             | 52,808,501     | -          | -           | -       | -           |
| <b>Non - Financial Assets measured at fair value</b>                     |                |            |             |         |             |
| Operating fixed assets (land and buildings)                              | 43,552,234     | -          | 43,552,234  | -       | 43,552,234  |
| Non-banking assets                                                       | 3,838,230      | -          | 3,838,230   | -       | 3,838,230   |
| <b>Off-balance sheet financial instruments - measured at fair value</b>  |                |            |             |         |             |
| Forward purchase of foreign exchange                                     | 217,809,539    | -          | 4,146,908   | -       | 4,146,908   |
| Forward sale of foreign exchange                                         | 187,805,779    | -          | 3,379,897   | -       | 3,379,897   |
| Derivatives purchase                                                     | 5,176,612      | -          | 1,232,827   | -       | 1,232,827   |
| Derivatives sale                                                         | 5,068,194      | -          | 1,229,116   | -       | 1,229,116   |

The Bank's policy is to recognise transfers into and out of the different fair value hierarchy levels at the date the event or change in circumstances that caused the transfer occurred. There were no transfers between levels 1 and 2 during the year.

**(a) Financial instruments in level 1**

Financial instruments included in level 1 comprise of investments in listed ordinary shares and units of mutual funds.

**(b) Financial instruments in level 2**

Financial instruments included in level 2 comprise of Sukuk Bonds, Pakistan Investment Bonds, Market Treasury Bills, Term Finance certificates, FX options, Cross Currency Swaps, Interest Rate Swaps and Forward Exchange Contracts.

**(c) Financial instruments in level 3**

Currently, no financial instruments are classified in level 3.



# Notes To The Unconsolidated Financial Statements

For the year ended December 31, 2020

## 42 SEGMENT INFORMATION

### 42.1 Segment details with respect to business activities

The segment analysis with respect to business activity is as follows:

|                                        | 2020                 |                   |                    |                       |                       |                    |                      |                        | Total                |
|----------------------------------------|----------------------|-------------------|--------------------|-----------------------|-----------------------|--------------------|----------------------|------------------------|----------------------|
|                                        | Retail Banking       | Consumer Banking  | Corporate Banking  | Treasury              | International Banking | Others             | Sub-total            | Eliminations           |                      |
|                                        | (Rupees in '000)     |                   |                    |                       |                       |                    |                      |                        |                      |
| <b>Profit &amp; Loss</b>               |                      |                   |                    |                       |                       |                    |                      |                        |                      |
| Net mark-up/return/profit              | (44,807,213)         | 2,788,656         | 28,085,051         | 83,819,922            | 1,448,075             | -                  | 71,334,491           | -                      | 71,334,491           |
| Inter segment revenue - net            | 86,028,798           | (486,242)         | (22,360,468)       | (69,939,999)          | (171,994)             | 6,929,905          | -                    | -                      | -                    |
| Non mark-up / return / interest income | 6,306,650            | 2,118,001         | 3,282,442          | 5,618,895             | 813,588               | (3,789)            | 18,135,787           | -                      | 18,135,787           |
| Total Income                           | 47,528,235           | 4,420,415         | 9,007,025          | 19,498,818            | 2,089,669             | 6,926,116          | 89,470,278           | -                      | 89,470,278           |
| Segment direct expenses                | 20,460,118           | 1,462,911         | 586,415            | 368,025               | 1,309,898             | 9,720,790          | 33,908,157           | -                      | 33,908,157           |
| Inter segment expense allocation       | -                    | -                 | -                  | -                     | -                     | -                  | -                    | -                      | -                    |
| Total expenses                         | 20,460,118           | 1,462,911         | 586,415            | 368,025               | 1,309,898             | 9,720,790          | 33,908,157           | -                      | 33,908,157           |
| Provisions                             | 2,306,248            | 113,643           | 2,763,155          | (31,111)              | 129,368               | 2,031,863          | 7,313,166            | -                      | 7,313,166            |
| Profit before tax                      | 24,761,869           | 2,843,861         | 5,657,455          | 19,161,904            | 650,403               | (4,826,537)        | 48,248,955           | -                      | 48,248,955           |
| <b>Balance Sheet</b>                   |                      |                   |                    |                       |                       |                    |                      |                        |                      |
| Cash and Bank balances                 | 58,362,119           | 317,242           | 394,030            | 64,577,426            | 21,166,578            | 1,393,773          | 146,211,167          | -                      | 146,211,167          |
| Investments                            | -                    | -                 | 10,578,310         | 990,720,067           | 14,571,071            | -                  | 1,015,869,448        | -                      | 1,015,869,448        |
| Net inter segment lending              | 1,050,376,236        | -                 | -                  | -                     | -                     | 201,834,399        | 1,252,210,635        | (1,252,210,635)        | -                    |
| Lendings to financial institutions     | -                    | -                 | -                  | 6,137,258             | 11,002,195            | -                  | 17,139,453           | -                      | 17,139,453           |
| Advances - performing                  | 94,735,206           | 26,845,772        | 313,633,477        | -                     | 21,681,241            | -                  | 456,895,696          | -                      | 456,895,696          |
| - non performing - net                 | 171,804              | 177,613           | 2,382              | -                     | 4,973,954             | 720,338            | 6,046,091            | -                      | 6,046,091            |
| Others                                 | 35,621,546           | 2,370,726         | 22,789,948         | 12,206,991            | 4,580,374             | 37,731,030         | 115,300,615          | -                      | 115,300,615          |
| <b>Total Assets</b>                    | <b>1,239,266,911</b> | <b>29,711,353</b> | <b>347,398,147</b> | <b>1,073,641,741</b>  | <b>77,975,413</b>     | <b>241,679,540</b> | <b>3,009,673,105</b> | <b>(1,252,210,635)</b> | <b>1,757,462,470</b> |
| Borrowings                             | 58,910,004           | -                 | 10,372,566         | 91,069,170            | 3,649,793             | -                  | 164,001,533          | -                      | 164,001,533          |
| Deposits and other accounts            | 1,147,268,725        | 21,263,015        | 65,961,390         | -                     | 55,009,174            | -                  | 1,289,502,304        | -                      | 1,289,502,304        |
| Net inter segment borrowing            | -                    | 4,816,853         | 252,358,835        | 981,733,802           | 13,301,145            | -                  | 1,252,210,635        | (1,252,210,635)        | -                    |
| Others                                 | 33,088,182           | 3,631,485         | 18,705,356         | 898,769               | 6,015,301             | 51,577,585         | 113,856,678          | -                      | 113,856,678          |
| <b>Total liabilities</b>               | <b>1,239,266,911</b> | <b>29,711,353</b> | <b>347,398,147</b> | <b>1,073,641,741</b>  | <b>77,975,413</b>     | <b>51,577,585</b>  | <b>2,819,571,150</b> | <b>(1,252,210,635)</b> | <b>1,567,360,515</b> |
| Equity                                 | -                    | -                 | -                  | -                     | -                     | 190,101,955        | 190,101,955          | -                      | 190,101,955          |
| <b>Total Equity &amp; liabilities</b>  | <b>1,239,266,911</b> | <b>29,711,353</b> | <b>347,398,147</b> | <b>1,073,641,741</b>  | <b>77,975,413</b>     | <b>241,679,540</b> | <b>3,009,673,105</b> | <b>(1,252,210,635)</b> | <b>1,757,462,470</b> |
| <b>Contingencies &amp; Commitments</b> | <b>55,974,597</b>    | <b>-</b>          | <b>288,001,956</b> | <b>320,068,131</b>    | <b>20,930,195</b>     | <b>29,063,504</b>  | <b>714,038,383</b>   | <b>-</b>               | <b>714,038,383</b>   |
| 2019                                   |                      |                   |                    |                       |                       |                    |                      |                        |                      |
| Retail Banking                         | Consumer Banking     | Corporate Banking | Treasury           | International Banking | Others                | Sub-total          | Eliminations         | Total                  |                      |
| (Rupees in '000)                       |                      |                   |                    |                       |                       |                    |                      |                        |                      |
| <b>Profit &amp; Loss</b>               |                      |                   |                    |                       |                       |                    |                      |                        |                      |
| Net mark-up/return/profit              | (50,496,018)         | 3,938,893         | 36,263,272         | 68,147,338            | 1,762,729             | -                  | 59,616,214           | -                      | 59,616,214           |
| Inter segment revenue - net            | 99,832,569           | (2,583,003)       | (31,413,118)       | (73,135,260)          | (180,860)             | 7,479,672          | -                    | -                      | -                    |
| Non mark-up / return / interest income | 6,318,956            | 2,111,319         | 3,414,776          | 3,519,577             | 782,895               | 531,430            | 16,678,953           | -                      | 16,678,953           |
| Total Income                           | 55,655,507           | 3,467,209         | 8,264,930          | (1,468,345)           | 2,364,764             | 8,011,102          | 76,295,167           | -                      | 76,295,167           |
| Segment direct expenses                | 21,762,153           | 1,330,299         | 525,336            | 311,978               | 1,284,815             | 8,494,740          | 33,709,321           | -                      | 33,709,321           |
| Inter segment expense allocation       | -                    | -                 | -                  | -                     | -                     | -                  | -                    | -                      | -                    |
| Total expenses                         | 21,762,153           | 1,330,299         | 525,336            | 311,978               | 1,284,815             | 8,494,740          | 33,709,321           | -                      | 33,709,321           |
| Provisions                             | 345,610              | (34,217)          | 947,291            | 2,772,041             | 75,179                | (1,622,370)        | 2,483,534            | -                      | 2,483,534            |
| Profit before tax                      | 33,547,744           | 2,171,127         | 6,792,303          | (4,552,364)           | 1,004,770             | 1,138,732          | 40,102,312           | -                      | 40,102,312           |
| <b>Balance Sheet</b>                   |                      |                   |                    |                       |                       |                    |                      |                        |                      |
| Cash and Bank balances                 | 50,154,942           | 21,483            | 676,139            | 65,572,277            | 28,149,362            | 672,833            | 145,247,036          | -                      | 145,247,036          |
| Investments                            | -                    | -                 | 10,636,292         | 723,114,519           | 15,011,691            | -                  | 748,764,502          | -                      | 748,764,502          |
| Net inter segment lending              | 940,015,024          | -                 | -                  | -                     | -                     | 164,292,627        | 1,104,307,651        | (1,104,307,651)        | -                    |
| Lendings to financial institutions     | -                    | -                 | -                  | 880,853               | 209,205               | -                  | 1,090,058            | -                      | 1,090,058            |
| Advances - performing                  | 98,464,054           | 24,342,756        | 341,191,287        | -                     | 25,190,939            | -                  | 489,189,036          | -                      | 489,189,036          |
| - non performing - net                 | 1,074,787            | 113,148           | 1,237,494          | -                     | 4,836,865             | 227,544            | 7,489,838            | -                      | 7,489,838            |
| Others                                 | 34,759,963           | 1,882,259         | 25,393,004         | 13,804,786            | 2,368,790             | 45,162,743         | 123,371,545          | -                      | 123,371,545          |
| <b>Total Assets</b>                    | <b>1,124,468,770</b> | <b>26,359,646</b> | <b>379,136,216</b> | <b>803,372,435</b>    | <b>75,766,852</b>     | <b>210,355,747</b> | <b>2,619,459,666</b> | <b>(1,104,307,651)</b> | <b>1,515,152,015</b> |
| Borrowings                             | 45,355,965           | -                 | 7,057,504          | 33,572,200            | 3,520,223             | -                  | 89,505,892           | -                      | 89,505,892           |
| Deposits and other accounts            | 1,033,804,761        | -                 | 55,425,048         | -                     | 55,523,627            | 9,823              | 1,144,763,259        | -                      | 1,144,763,259        |
| Net inter segment borrowing            | -                    | 24,124,908        | 299,650,838        | 768,067,183           | 12,464,722            | -                  | 1,104,307,651        | (1,104,307,651)        | -                    |
| Others                                 | 45,308,044           | 2,234,738         | 17,002,826         | 1,733,052             | 4,258,280             | 41,431,141         | 111,968,081          | -                      | 111,968,081          |
| <b>Total liabilities</b>               | <b>1,124,468,770</b> | <b>26,359,646</b> | <b>379,136,216</b> | <b>803,372,435</b>    | <b>75,766,852</b>     | <b>41,440,964</b>  | <b>2,450,544,883</b> | <b>(1,104,307,651)</b> | <b>1,346,237,232</b> |
| Equity                                 | -                    | -                 | -                  | -                     | -                     | 168,914,783        | 168,914,783          | -                      | 168,914,783          |
| <b>Total Equity &amp; liabilities</b>  | <b>1,124,468,770</b> | <b>26,359,646</b> | <b>379,136,216</b> | <b>803,372,435</b>    | <b>75,766,852</b>     | <b>210,355,747</b> | <b>2,619,459,666</b> | <b>(1,104,307,651)</b> | <b>1,515,152,015</b> |
| <b>Contingencies &amp; Commitments</b> | <b>48,973,361</b>    | <b>-</b>          | <b>262,455,692</b> | <b>496,556,621</b>    | <b>14,015,586</b>     | <b>29,145,510</b>  | <b>851,146,770</b>   | <b>-</b>               | <b>851,146,770</b>   |

# Notes To The Unconsolidated Financial Statements

For the year ended December 31, 2020

## 42.2 Segment details with respect to geographical locations

### GEOGRAPHICAL SEGMENT ANALYSIS

|                                        | 2020                 |                   |                   |                      |                     |                      |
|----------------------------------------|----------------------|-------------------|-------------------|----------------------|---------------------|----------------------|
|                                        | Pakistan             | South Asia        | Middle East       | Sub-total            | Eliminations        | Total                |
|                                        | (Rupees in '000)     |                   |                   |                      |                     |                      |
| <b>Profit &amp; Loss</b>               |                      |                   |                   |                      |                     |                      |
| Net mark-up/return/profit              | 69,887,495           | 862,868           | 584,128           | 71,334,491           | -                   | 71,334,491           |
| Inter segment revenue - net            | 111,160              | (95,930)          | (15,230)          | -                    | -                   | -                    |
| Non mark-up / return / interest income | 17,325,905           | 265,900           | 543,982           | 18,135,787           | -                   | 18,135,787           |
| <b>Total Income</b>                    | <b>87,324,560</b>    | <b>1,032,838</b>  | <b>1,112,880</b>  | <b>89,470,278</b>    | <b>-</b>            | <b>89,470,278</b>    |
| Segment direct expenses                | 32,601,367           | 650,469           | 656,321           | 33,908,157           | -                   | 33,908,157           |
| Inter segment expense allocation       | -                    | -                 | -                 | -                    | -                   | -                    |
| <b>Total expenses</b>                  | <b>32,601,367</b>    | <b>650,469</b>    | <b>656,321</b>    | <b>33,908,157</b>    | <b>-</b>            | <b>33,908,157</b>    |
| Provisions                             | 7,183,798            | 78,422            | 50,946            | 7,313,166            | -                   | 7,313,166            |
| <b>Profit before tax</b>               | <b>47,539,395</b>    | <b>303,947</b>    | <b>405,613</b>    | <b>48,248,955</b>    | <b>-</b>            | <b>48,248,955</b>    |
| <b>Balance Sheet</b>                   |                      |                   |                   |                      |                     |                      |
| Cash and Bank balances                 | 125,365,815          | 1,556,335         | 19,289,017        | 146,211,167          | -                   | 146,211,167          |
| Investments                            | 1,001,298,378        | 10,519,130        | 4,051,940         | 1,015,869,448        | -                   | 1,015,869,448        |
| Net inter segment lendings             | 12,319,043           | -                 | -                 | 12,319,043           | (12,319,043)        | -                    |
| Lendings to financial institutions     | 6,137,258            | 1,864,193         | 9,138,002         | 17,139,453           | -                   | 17,139,453           |
| Advances - performing                  | 435,310,355          | 12,722,090        | 8,863,251         | 466,895,696          | -                   | 466,895,696          |
| - non performing - net                 | 6,034,187            | 11,904            | -                 | 6,046,091            | -                   | 6,046,091            |
| Others                                 | 110,746,462          | 4,057,318         | 496,835           | 115,300,615          | -                   | 115,300,615          |
| <b>Total Assets</b>                    | <b>1,697,211,498</b> | <b>30,730,970</b> | <b>41,839,045</b> | <b>1,769,781,513</b> | <b>(12,319,043)</b> | <b>1,757,462,470</b> |
| Borrowings                             | 160,351,740          | 1,790,053         | 1,859,740         | 164,001,533          | -                   | 164,001,533          |
| Deposits and other accounts            | 1,237,359,663        | 18,298,522        | 33,844,119        | 1,289,502,304        | -                   | 1,289,502,304        |
| Net inter segment borrowing            | -                    | 6,525,907         | 5,793,136         | 12,319,043           | (12,319,043)        | -                    |
| Others                                 | 109,398,140          | 4,116,488         | 342,050           | 113,856,678          | -                   | 113,856,678          |
| <b>Total liabilities</b>               | <b>1,507,109,543</b> | <b>30,730,970</b> | <b>41,839,045</b> | <b>1,579,679,558</b> | <b>(12,319,043)</b> | <b>1,567,360,515</b> |
| Equity                                 | 190,101,955          | -                 | -                 | 190,101,955          | -                   | 190,101,955          |
| <b>Total Equity &amp; liabilities</b>  | <b>1,697,211,498</b> | <b>30,730,970</b> | <b>41,839,045</b> | <b>1,769,781,513</b> | <b>(12,319,043)</b> | <b>1,757,462,470</b> |
| Contingencies & Commitments            | 693,108,189          | 17,479,001        | 3,451,193         | 714,038,383          | -                   | 714,038,383          |
|                                        | 2019                 |                   |                   |                      |                     |                      |
|                                        | Pakistan             | South Asia        | Middle East       | Sub-total            | Eliminations        | Total                |
|                                        | (Rupees in '000)     |                   |                   |                      |                     |                      |
| <b>Profit &amp; Loss</b>               |                      |                   |                   |                      |                     |                      |
| Net mark-up/return/profit              | 57,855,267           | 1,085,296         | 675,651           | 59,616,214           | -                   | 59,616,214           |
| Inter segment revenue - net            | 107,447              | (119,613)         | 12,166            | -                    | -                   | -                    |
| Non mark-up / return / interest income | 15,915,192           | 251,485           | 512,276           | 16,678,953           | -                   | 16,678,953           |
| <b>Total Income</b>                    | <b>73,877,906</b>    | <b>1,217,168</b>  | <b>1,200,093</b>  | <b>76,295,167</b>    | <b>-</b>            | <b>76,295,167</b>    |
| Segment direct expenses                | 32,419,640           | 737,142           | 552,539           | 33,709,321           | -                   | 33,709,321           |
| Inter segment expense allocation       | -                    | -                 | -                 | -                    | -                   | -                    |
| <b>Total expenses</b>                  | <b>32,419,640</b>    | <b>737,142</b>    | <b>552,539</b>    | <b>33,709,321</b>    | <b>-</b>            | <b>33,709,321</b>    |
| Provisions                             | 2,388,895            | 29,232            | 65,407            | 2,483,534            | -                   | 2,483,534            |
| <b>Profit before tax</b>               | <b>39,069,371</b>    | <b>450,794</b>    | <b>582,147</b>    | <b>40,102,312</b>    | <b>-</b>            | <b>40,102,312</b>    |
| <b>Balance Sheet</b>                   |                      |                   |                   |                      |                     |                      |
| Cash and Bank balances                 | 117,308,448          | 2,169,276         | 25,769,312        | 145,247,036          | -                   | 145,247,036          |
| Investments                            | 733,752,811          | 5,571,042         | 9,440,649         | 748,764,502          | -                   | 748,764,502          |
| Net inter segment lendings             | 11,539,343           | -                 | -                 | 11,539,343           | (11,539,343)        | -                    |
| Lendings to financial institutions     | 880,852              | 209,206           | -                 | 1,090,058            | -                   | 1,090,058            |
| Advances - performing                  | 464,016,151          | 17,771,048        | 7,401,837         | 489,189,036          | -                   | 489,189,036          |
| - non performing - net                 | 7,460,190            | 29,648            | -                 | 7,489,838            | -                   | 7,489,838            |
| Others                                 | 121,004,686          | 2,193,220         | 173,639           | 123,371,545          | -                   | 123,371,545          |
| <b>Total Assets</b>                    | <b>1,455,962,481</b> | <b>27,943,440</b> | <b>42,785,437</b> | <b>1,526,691,358</b> | <b>(11,539,343)</b> | <b>1,515,152,015</b> |
| Borrowings                             | 85,985,670           | 845,703           | 2,674,519         | 89,505,892           | -                   | 89,505,892           |
| Deposits and other accounts            | 1,091,755,442        | 18,431,297        | 34,576,520        | 1,144,763,259        | -                   | 1,144,763,259        |
| Net inter segment borrowing            | -                    | 6,151,041         | 5,388,302         | 11,539,343           | (11,539,343)        | -                    |
| Others                                 | 109,306,586          | 2,515,399         | 146,096           | 111,968,081          | -                   | 111,968,081          |
| <b>Total liabilities</b>               | <b>1,287,047,698</b> | <b>27,943,440</b> | <b>42,785,437</b> | <b>1,357,776,575</b> | <b>(11,539,343)</b> | <b>1,346,237,232</b> |
| Equity                                 | 168,914,783          | -                 | -                 | 168,914,783          | -                   | 168,914,783          |
| <b>Total Equity &amp; liabilities</b>  | <b>1,455,962,481</b> | <b>27,943,440</b> | <b>42,785,437</b> | <b>1,526,691,358</b> | <b>(11,539,343)</b> | <b>1,515,152,015</b> |
| Contingencies & Commitments            | 837,131,184          | 9,436,548         | 4,579,038         | 851,146,770          | -                   | 851,146,770          |

**42.3** Transactions between reportable segments are based on an appropriate transfer pricing mechanism using agreed rates. Furthermore, segment assets and liabilities include inter segment balances. Costs which are not allocated to segments are included in the Head office. Income taxes are managed at bank level and are not allocated to operating segments.

**42.4** No revenue from transactions with a single external customer or counterparty amounted to 10% or more of the Bank's total revenue in 2020 or 2019.

# Notes To The Unconsolidated Financial Statements

For the year ended December 31, 2020

43

## RELATED PARTY TRANSACTIONS

The Bank has related party relationship with its subsidiaries, associates, employee benefit plans, its directors and key management personnel and their close family members.

The Bank enters into transactions with related parties in the ordinary course of business and on substantially the same terms as for comparable transactions with person of similar standing. Contributions to and accruals in respect of staff retirement benefits and other benefit plans are made in accordance with the actuarial valuations / terms of the contribution plan. Remuneration to the executives / officers is determined in accordance with the terms of their appointment.

Details of transactions with related parties during the year, other than those which have been disclosed elsewhere in these unconsolidated financial statements are as follows:

|                                                  | 2020             |                          |              |            |                       |           | 2019                     |              |            |                       |   |             |
|--------------------------------------------------|------------------|--------------------------|--------------|------------|-----------------------|-----------|--------------------------|--------------|------------|-----------------------|---|-------------|
|                                                  | Directors        | Key management personnel | Subsidiaries | Associates | Other related Parties | Directors | Key management personnel | Subsidiaries | Associates | Other related parties |   |             |
|                                                  | (Rupees in '000) |                          |              |            |                       |           |                          |              |            |                       |   |             |
| <b>Balances with other banks</b>                 |                  |                          |              |            |                       |           |                          |              |            |                       |   |             |
| In current accounts                              | -                | -                        | -            | -          | -                     | -         | -                        | -            | -          | -                     | - | 14,389      |
|                                                  | -                | -                        | -            | -          | -                     | -         | -                        | -            | -          | -                     | - | 14,389      |
| <b>Lendings to Financial Institutions</b>        |                  |                          |              |            |                       |           |                          |              |            |                       |   |             |
| Opening balance                                  | -                | -                        | 880,853      | -          | -                     | -         | -                        | 631,351      | -          | -                     | - | -           |
| Addition during the year                         | -                | -                        | 23,703,928   | -          | -                     | -         | -                        | 22,355,349   | -          | -                     | - | -           |
| Repaid during the year                           | -                | -                        | (24,584,781) | -          | -                     | -         | -                        | (22,105,847) | -          | -                     | - | -           |
| Closing balance                                  | -                | -                        | -            | -          | -                     | -         | -                        | 880,853      | -          | -                     | - | -           |
|                                                  | -                | -                        | -            | -          | -                     | -         | -                        | -            | -          | -                     | - | -           |
| <b>Investments</b>                               |                  |                          |              |            |                       |           |                          |              |            |                       |   |             |
| Opening balance                                  | -                | -                        | 12,346,537   | 700,401    | 254,253               | -         | -                        | 12,046,512   | 700,401    | -                     | - | 254,253     |
| Investment made during the year                  | -                | -                        | -            | -          | -                     | -         | -                        | 350,000      | -          | -                     | - | -           |
| Investment disposed off during the year          | -                | -                        | (27,500)     | -          | -                     | -         | -                        | -            | -          | -                     | - | -           |
| Adjustment under amalgamation scheme             | -                | -                        | -            | -          | -                     | -         | -                        | (49,975)     | -          | -                     | - | -           |
| Closing balance                                  | -                | -                        | 12,319,037   | 700,401    | 254,253               | -         | -                        | 12,346,537   | 700,401    | -                     | - | 254,253     |
| Provision for diminution in value of investments | -                | -                        | 725          | -          | 5,000                 | -         | -                        | 725          | -          | -                     | - | 5,000       |
|                                                  | -                | -                        | -            | -          | -                     | -         | -                        | -            | -          | -                     | - | -           |
| <b>Advances</b>                                  |                  |                          |              |            |                       |           |                          |              |            |                       |   |             |
| Opening balance                                  | 1,722            | 129,048                  | 889,811      | -          | 339,520               | 658       | 141,390                  | 366,872      | -          | -                     | - | 1,060,277   |
| Addition / exchange adjustment during the year   | 18,202           | 60,257                   | -            | 556,898    | 336,695               | 29,148    | 62,216                   | 522,939      | -          | -                     | - | 1,642,434   |
| Repaid during the year                           | (18,882)         | (21,947)                 | (33,107)     | -          | (303,183)             | (28,084)  | (55,470)                 | -            | -          | -                     | - | (1,558,481) |
| Transfer in / (out)                              | -                | (601)                    | -            | -          | (220,885)             | -         | (19,087)                 | -            | -          | -                     | - | (794,710)   |
| Closing balance                                  | 1,042            | 166,757                  | 856,704      | 356,898    | 152,147               | 1,722     | 129,048                  | 889,811      | -          | -                     | - | 339,520     |
| Provision held against advances                  | -                | -                        | -            | -          | -                     | -         | -                        | -            | -          | -                     | - | -           |

# Notes To The Unconsolidated Financial Statements

For the year ended December 31, 2020

|                                                                     | 2020      |                          |              |              |                       |              | 2019                     |              |              |                       |  |  |
|---------------------------------------------------------------------|-----------|--------------------------|--------------|--------------|-----------------------|--------------|--------------------------|--------------|--------------|-----------------------|--|--|
|                                                                     | Directors | Key management personnel | Subsidiaries | Associates   | Other related Parties | Directors    | Key management personnel | Subsidiaries | Associates   | Other related parties |  |  |
| <b>Other Assets</b>                                                 |           |                          |              |              |                       |              |                          |              |              |                       |  |  |
| Markup receivable                                                   | -         | 3,149                    | 2,338        | 895          | 2,382                 | -            | -                        | 3,202        | -            | 5,191                 |  |  |
| Advances, deposits, advance rent and other prepayments              | -         | -                        | 12,715       | 310,504      | 27,835                | -            | -                        | -            | 246,720      | 27,080                |  |  |
| Acceptances                                                         | -         | -                        | -            | -            | -                     | -            | -                        | -            | -            | -                     |  |  |
| Receivable from Pension Fund                                        | -         | -                        | -            | -            | 3,370,179             | -            | -                        | -            | -            | 3,605,121             |  |  |
| Unrealized gain on forward foreign exchange contracts - outstanding | -         | -                        | 39,415       | -            | -                     | -            | -                        | 27,493       | -            | -                     |  |  |
| Provision held against other assets                                 | -         | -                        | -            | -            | -                     | -            | -                        | -            | -            | -                     |  |  |
| <b>Borrowings</b>                                                   |           |                          |              |              |                       |              |                          |              |              |                       |  |  |
| Opening balance                                                     | -         | -                        | 3,902        | -            | 69,166                | -            | -                        | 19,146       | -            | -                     |  |  |
| Borrowings / exchange adjustment during the year                    | -         | -                        | 482,356      | -            | 7,973                 | -            | -                        | 386,228      | -            | 144,166               |  |  |
| Settled during the year                                             | -         | -                        | (460,902)    | -            | -                     | -            | -                        | (401,471)    | -            | (75,000)              |  |  |
| Closing balance                                                     | -         | -                        | 25,356       | -            | 77,139                | -            | -                        | 3,902        | -            | 69,166                |  |  |
| <b>Deposits and other accounts</b>                                  |           |                          |              |              |                       |              |                          |              |              |                       |  |  |
| Opening balance                                                     | 602,381   | 140,761                  | 54,482       | 3,657,552    | 4,179,849             | 3,745,457    | 168,528                  | 65,933       | 3,339,847    | 3,212,620             |  |  |
| Received during the year                                            | 669,282   | 1,189,437                | 2,349,111    | 44,628,206   | 76,375,987            | 9,889,584    | 866,766                  | 4,513,372    | 22,234,251   | 62,263,273            |  |  |
| Withdrawn during the year                                           | (969,533) | (1,163,832)              | (2,346,830)  | (43,469,978) | (75,154,115)          | (13,025,336) | (884,532)                | (4,515,594)  | (21,916,546) | (61,423,281)          |  |  |
| Transfer in / (out) - net                                           | -         | (27,800)                 | (2,885)      | -            | (531,780)             | (7,324)      | (10,001)                 | (9,229)      | -            | 127,237               |  |  |
| Closing balance                                                     | 302,130   | 138,566                  | 53,878       | 4,815,780    | 4,869,941             | 602,381      | 140,761                  | 54,482       | 3,657,552    | 4,179,849             |  |  |
| <b>Other Liabilities</b>                                            |           |                          |              |              |                       |              |                          |              |              |                       |  |  |
| Markup payable                                                      | 50        | 100                      | -            | 42,549       | 10,654                | 7,263        | 556                      | 158          | 50,535       | 66,906                |  |  |
| Accrued expenses and other payable                                  | -         | -                        | 22,850       | 62,624       | 32                    | 15,326       | -                        | 23,134       | 62,402       | 50                    |  |  |
| Payable to MCB Employee Security Services                           | -         | -                        | -            | -            | 27,031                | -            | -                        | -            | -            | 24,565                |  |  |
| Advance received against sale of property                           | -         | -                        | 20,000       | -            | -                     | -            | -                        | 20,000       | -            | -                     |  |  |
| <b>Contingencies and Commitments</b>                                |           |                          |              |              |                       |              |                          |              |              |                       |  |  |
| Commitments and contingent liabilities - outstanding                | -         | -                        | -            | 10,512       | 1,756,270             | -            | -                        | -            | 10,444       | 746,868               |  |  |
| Forward foreign exchange contracts (Notional) - outstanding         | -         | -                        | 1,342,106    | -            | -                     | -            | -                        | 2,044,093    | -            | -                     |  |  |
| Bank guarantee                                                      | -         | -                        | 102,038      | -            | -                     | -            | -                        | 26,711       | -            | -                     |  |  |

# Notes To The Unconsolidated Financial Statements

For the year ended December 31, 2020

|                                                                    | 2020      |                          |              |            |                       |           | 2019                     |              |            |                       |  |  |
|--------------------------------------------------------------------|-----------|--------------------------|--------------|------------|-----------------------|-----------|--------------------------|--------------|------------|-----------------------|--|--|
|                                                                    | Directors | Key management personnel | Subsidiaries | Associates | Other related Parties | Directors | Key management personnel | Subsidiaries | Associates | Other related parties |  |  |
| <b>RELATED PARTY TRANSACTIONS</b>                                  |           |                          |              |            |                       |           |                          |              |            |                       |  |  |
| Income                                                             |           |                          |              |            |                       |           |                          |              |            |                       |  |  |
| Markup / return / interest earned                                  | -         | 13,098                   | 143,011      | 1,809      | 13,189                | -         | 12,357                   | 208,168      | -          | 20,846                |  |  |
| Fee and commission income                                          | -         | -                        | 30,253       | 1,177,371  | 1,638                 | -         | -                        | 56,047       | 1,301,954  | 4,631                 |  |  |
| Dividend income                                                    | -         | -                        | 120,109      | 192,500    | 36,213                | -         | -                        | 49,892       | 175,000    | 41,162                |  |  |
| Gain on forward foreign exchange contracts matured during the year | -         | -                        | -            | -          | 53,120                | -         | -                        | -            | -          | 12,850                |  |  |
| Net gain on sale of securities                                     | 72        | 40                       | -            | 3,836      | 6,485                 | -         | -                        | -            | 281        | 10,990                |  |  |
| Gain on sale of assets                                             | -         | 98                       | -            | -          | -                     | -         | 186                      | -            | -          | -                     |  |  |
| Rent income and reimbursement of other expenses                    | -         | -                        | 42,514       | 8,808      | 2,280                 | -         | -                        | 40,100       | 8,485      | 3,105                 |  |  |
| <b>Expense</b>                                                     |           |                          |              |            |                       |           |                          |              |            |                       |  |  |
| Markup / return / interest expensed                                | 30,257    | 2,626                    | 2,008        | 223,767    | 233,677               | 145,454   | 1,999                    | 2,771        | 218,029    | 364,984               |  |  |
| <b>Other Operating expenses</b>                                    |           |                          |              |            |                       |           |                          |              |            |                       |  |  |
| Clearing expenses paid to NIFT                                     | -         | -                        | -            | -          | 166,175               | -         | -                        | -            | -          | 152,009               |  |  |
| Contribution to provident fund                                     | -         | -                        | -            | -          | 394,598               | -         | -                        | -            | -          | 366,744               |  |  |
| Rent expenses                                                      | -         | -                        | 10,715       | 42,264     | 37,947                | -         | -                        | 9,741        | 21,347     | 38,680                |  |  |
| Cash sorting expenses                                              | -         | -                        | -            | -          | 114,845               | -         | -                        | -            | -          | 160,766               |  |  |
| Stationery expenses                                                | -         | -                        | -            | -          | 244,697               | -         | -                        | -            | -          | 258,411               |  |  |
| Security guards expenses                                           | -         | -                        | -            | -          | 329,116               | -         | -                        | -            | -          | 359,119               |  |  |
| Remuneration to key executives and non-executive directors fee     | 177,166   | 509,676                  | -            | -          | -                     | 165,579   | 514,168                  | -            | -          | -                     |  |  |
| Outsourcing service expenses                                       | -         | -                        | -            | 275,517    | -                     | -         | -                        | -            | 258,190    | -                     |  |  |
| Donation Expense                                                   | -         | -                        | -            | 95,000     | -                     | -         | -                        | -            | -          | -                     |  |  |
| E-dividend processing fee and CDC charges                          | -         | -                        | -            | 4,757      | -                     | -         | -                        | -            | -          | 5,968                 |  |  |
| Travelling expenses                                                | -         | -                        | -            | 38,507     | -                     | -         | -                        | -            | -          | 37,644                |  |  |
| Hotel stay expenses                                                | -         | -                        | -            | 3,410      | -                     | -         | -                        | -            | -          | 2,573                 |  |  |
| Repair and maintenance charges                                     | -         | -                        | -            | 1,989      | -                     | -         | -                        | -            | -          | 2,125                 |  |  |
| Advertisement expenses                                             | -         | -                        | -            | 7,308      | -                     | -         | -                        | -            | -          | 12,934                |  |  |
| Miscellaneous expenses and payments                                | -         | -                        | -            | 3,225      | -                     | -         | -                        | -            | -          | 2,376                 |  |  |
| Insurance premium-net of refund                                    | -         | -                        | -            | 646,676    | -                     | -         | -                        | -            | 719,873    | -                     |  |  |
| Insurance claim settled                                            | -         | -                        | -            | 46,067     | -                     | -         | -                        | -            | 57,566     | -                     |  |  |
| <b>Other Transactions</b>                                          |           |                          |              |            |                       |           |                          |              |            |                       |  |  |
| Proceeds from sale of assets                                       | -         | 381                      | -            | -          | -                     | -         | -                        | -            | -          | -                     |  |  |
| Purchase of fixed assets                                           | -         | -                        | 1,550        | 3,277      | 5,712                 | -         | 347                      | -            | 46,339     | 20,003                |  |  |
| Sale of foreign currency                                           | -         | -                        | 45,457,828   | -          | -                     | -         | -                        | 35,675,520   | -          | -                     |  |  |
| Purchase of foreign currency                                       | -         | -                        | 35,244,343   | -          | -                     | -         | -                        | 25,874,008   | -          | -                     |  |  |
| Payments against home remittances                                  | -         | -                        | 3,898,627    | -          | -                     | -         | -                        | 2,980,860    | -          | -                     |  |  |
| Sale of government securities                                      | 288,847   | 124,304                  | -            | 5,740,348  | 8,592,672             | 203,735   | 94,105                   | -            | 6,043,338  | 22,634,697            |  |  |
| Purchase of government securities                                  | 19,827    | 999                      | -            | 1,232,917  | 653,148               | -         | 58,956                   | -            | 6,410,544  | 17,302,184            |  |  |
| Forward exchange contracts matured during the year                 | -         | -                        | -            | -          | 11,446,226            | -         | -                        | -            | -          | 24,426,964            |  |  |

The Chairman has been provided with free use of the Bank maintained car. The Chief Executive and certain executives are provided with free use of the Bank's maintained cars and household equipment in accordance with the terms of their employment.

## Notes To The Unconsolidated Financial Statements

For the year ended December 31, 2020

|           |                                                                      | 2020               | 2019               |
|-----------|----------------------------------------------------------------------|--------------------|--------------------|
|           |                                                                      | (Rupees in '000)   |                    |
| <b>44</b> | <b>CAPITAL ADEQUACY, LEVERAGE RATIO &amp; LIQUIDITY REQUIREMENTS</b> |                    |                    |
|           | <b>44.1 Capital Adequacy</b>                                         |                    |                    |
|           | <b>Minimum Capital Requirement (MCR):</b>                            |                    |                    |
|           | Paid-up capital (net of losses)                                      | 11,850,600         | 11,850,600         |
|           | <b>Capital Adequacy Ratio (CAR):</b>                                 |                    |                    |
|           | Eligible Common Equity Tier 1 (CET 1) Capital                        | 152,901,428        | 136,256,771        |
|           | Eligible Additional Tier 1 (ADT 1) Capital                           | –                  | –                  |
|           | Total Eligible Tier 1 Capital                                        | 152,901,428        | 136,256,771        |
|           | Eligible Tier 2 Capital                                              | 35,507,111         | 27,354,014         |
|           | <b>Total Eligible Capital (Tier 1 + Tier 2)</b>                      | <b>188,408,539</b> | <b>163,610,785</b> |
|           | <b>Risk Weighted Assets (RWAs):</b>                                  |                    |                    |
|           | Credit Risk                                                          | 635,599,185        | 638,492,645        |
|           | Market Risk                                                          | 122,603,850        | 108,276,486        |
|           | Operational Risk                                                     | 139,735,092        | 120,887,137        |
|           | <b>Total</b>                                                         | <b>897,938,127</b> | <b>867,656,268</b> |
|           | <b>Common Equity Tier 1 Capital Adequacy ratio</b>                   | <b>17.03%</b>      | <b>15.70%</b>      |
|           | <b>Tier 1 Capital Adequacy Ratio</b>                                 | <b>17.03%</b>      | <b>15.70%</b>      |
|           | <b>Total Capital Adequacy Ratio</b>                                  | <b>20.98%</b>      | <b>18.86%</b>      |

The SBP through its BSD Circular No. 07 dated April 15, 2009 has prescribed the minimum paid up capital (net of losses) for all locally incorporated banks of Rs. 10 billion. The paid up capital of the Bank for the year ended December 31, 2020 stood at Rs. 11.851 billion and is in compliance with the SBP requirements. Further, under Basel III instructions, banks are required to maintain minimum Capital Adequacy Ratio (CAR) of 11.50% (including a capital conservation buffer of 1.5% which has been revised downwards from 2.5% as per BPRD Circular No. 12 dated March 26, 2020), Common Equity Tier 1 (CET 1) ratio of 6.0% and Tier 1 ratio of 7.50% as at December 31, 2020. The Bank is fully compliant with prescribed ratios.

Under the current capital adequacy regulations, credit risk and market risk exposures are measured using the Standardized Approach and operational risk is measured using the Basic Indicator Approach. Credit risk mitigants are also applied against the Bank's exposures based on eligible collateral under simple approach.

|  |                                  | 2020             | 2019          |
|--|----------------------------------|------------------|---------------|
|  |                                  | (Rupees in '000) |               |
|  | <b>44.2 Leverage Ratio (LR):</b> |                  |               |
|  | Eligible Tier-1 Capital          | 152,901,428      | 136,256,771   |
|  | Total Exposures                  | 2,174,932,446    | 1,928,383,315 |
|  | Leverage Ratio                   | 7.03%            | 7.07%         |

# Notes To The Unconsolidated Financial Statements

For the year ended December 31, 2020

|                                         | 2020             | 2019        |
|-----------------------------------------|------------------|-------------|
|                                         | (Rupees in '000) |             |
| <b>44.3 Liquidity Requirements</b>      |                  |             |
| <b>Liquidity Coverage Ratio (LCR):</b>  |                  |             |
| Total High Quality Liquid Assets        | 934,508,535      | 713,965,089 |
| Total Net Cash Outflow                  | 393,109,786      | 362,188,259 |
| Liquidity Coverage Ratio                | 237.72%          | 197.13%     |
| <b>Net Stable Funding Ratio (NSFR):</b> |                  |             |
| Total Available Stable Funding          | 1,130,301,361    | 983,364,374 |
| Total Required Stable Funding           | 646,417,507      | 699,043,391 |
| Net Stable Funding Ratio                | 174.86%          | 140.67%     |

The full disclosures on the Capital Adequacy, Leverage Ratio & Liquidity Requirements as per SBP instructions issued from time to time are available at <https://www.mcb.com.pk/investor-relations/capital-adequacy-statements>.

## 45 RISK MANAGEMENT

Risk is an inherent part of banking business activities. The risk management framework and governance structure at MCB helps to mitigate and counter any foreseeable risk in its various lines of business. Risk awareness forms an integral part of strategic and operational activities of risk management. Through its Global Risk Management Policy, Bank sets the best course of action under uncertainty by identifying, prioritizing, mitigating and monitoring risk issues, with the goal of enhancing shareholders' value. Bank's risk management structure is based on the following five guiding principles:

- Optimizing risk/return in a controlled manner
- Establishing clear responsibility and accountability
- Establishing independent and properly resourced risk management function.
- Promoting open risk culture
- Adopting international best practices in risk management

Keeping in view dynamics of internal and external environment, the bank regularly reviews and updates policy manuals / frameworks and procedures in accordance with domestic regulatory environment and international standards.

The Bank executes its risk strategy and undertakes controlled risk-taking activities within its risk management framework. The Board of Directors and its relevant committee, i.e. the Risk Management & Portfolio Review Committee (RM&PRC), the senior management and its relevant committees, i.e. the Management Credit and Risk Committee (MC&RC), Asset Liability Committee (ALCO), etc., are responsible to ensure formulation and implementation of comprehensive Risk Management Framework. This framework is based on prudent risk identification, measurement, management and monitoring processes which are closely aligned with the activities of the bank. The framework combines core policies, procedures and process designs with broad oversight and is supported by an efficient monitoring mechanism across the bank to ensure that risks are kept within an acceptable level.

The Bank ensures that not only the relevant risks are identified but their implications are also considered and basis provided for managing and measuring the risks. Through Internal Control units, the Bank ensures that effective controls are in place to mitigate each of the identified risk.

Independent from business groups, Head of Risk Management reports functionally to the Risk Management & Portfolio Review Committee (RM&PRC) and administratively to the President; the RM&PRC convenes regular meetings to evaluate bank's risk and portfolio concentrations. The Risk Management Group performs the following critical functions:

- Risk Management Policy Formulation
- Credit Risk Management
- Credit Review

# Notes To The Unconsolidated Financial Statements

For the year ended December 31, 2020

- Credit Risk Control
- Market Risk Management
- Liquidity Risk Management
- Operational Risk Management
- IT Risk Management

Keeping in view the international best practices and SBP requirements, Board of Directors of the Bank has approved a Risk Appetite Statement, which takes into account quantitative and qualitative risk indicators, covering target ratios, credit, market, operational, liquidity and business risks.

## 45.1 Credit Risk

Credit risk arises from bank's dealings with individuals, corporate borrowers, financial institutions, sovereigns etc. The Bank is exposed to credit risk through its lending and investment activities. Credit risk makes up the largest part of the Bank's exposure and it stems from Bank's both on and off-balance sheet activities. Purpose of Credit Risk Management function is to identify, measure, manage, monitor and mitigate credit risk. To manage adverse outcomes in terms of unfavorable scenarios, multiple control factors in the lending structure of the Bank provide additional comfort and support. Such controls range from quality of eligible collateral, pre-disbursement safety measures to post disbursement monitoring.

The Bank has adopted Standardized Approach to measure Credit risk regulatory capital charge in compliance with Basel requirements. The approach mainly takes into account the assessment of external credit rating agencies. In line with SBP guidelines on Internal Credit Risk Rating Systems, the Bank has developed rating systems and all its borrowers are internally rated. In order to further enhance the credit risk analysis and the processes, Probability Default based internal credit risk rating (ICRR) system based on the statistical modeling and validation in line with Basel principles. The revamped ICRR is currently focused on Corporate Commercial and Corporate Large customer categories. The Internal Credit Risk Rating Model for rating of SME Customers has also been revamped to achieve more accurate results and to improve the quality of credit decisions.

In order to manage bank's credit risk, following policies and procedures are in place:

- Individuals who take or manage risks clearly understand them in order to protect the Bank from avoidable risks;
- The approval of credit limits to counter parties are subject to pre-fact review;
- Extension in credit facility or material change to the credit facility is subject to credit review;
- Approval and review process is reviewed by RM&PRC and internal audit;
- Management periodically reviews the powers of credit approving and credit reviewing authorities.

Ongoing administration of the credit portfolio is an essential part of the credit process that supports and controls extension and maintenance of credit. The Bank's Credit Risk Control is responsible for performing following activities:

- Credit disbursement authorization
- Collateral coverage and monitoring
- Compliance of loan covenants/ terms of approval
- Maintenance/ custody of collateral and security documentation
- Credit Risk Limit Controls

Credit Risk Monitoring is based on a comprehensive reporting framework. Continuous monitoring of the credit portfolio and the risks attached thereto are carried out at different levels including businesses, Audit & Risk Assets Review, Credit Risk Control, Credit Risk Management Division, etc.

To ensure a prudent distribution of asset portfolio, the Bank manages its lending and investment activities within an appropriate limits framework. Per party exposure limit is maintained in accordance with SBP Prudential Regulations.

The Bank creates specific provision against Non-Performing Loans (NPLs) in accordance with the Prudential Regulations and other directives issued by the State Bank of Pakistan (SBP) and charged to the profit and loss account. Provisions are held against identified as well as unidentified losses. Provisions against unidentified losses include general provision against consumer loans and Small



## Notes To The Unconsolidated Financial Statements

For the year ended December 31, 2020

enterprise (SEs) made in accordance with the requirements of the Prudential Regulations issued by SBP and provision based on historical loss experience on advances. General provisions pertaining to overseas advances are made in accordance with the requirements of the regulatory authorities of the respective countries. Please refer note No. 11.4 for reconciliation of changes in specific and general provisions.

The Risk Management function of the Bank has further strengthened its credit review procedures in the light of COVID-19 and is regularly conducting assessments of the credit portfolio to identify borrowers most likely to be affected due to changes in the business and economic environment.

### Management of Non Performing Loans

The Bank has a Special Assets Management (SAM) function, which is responsible for management of non performing loans. SAM undertakes restructuring / rescheduling of problem loans, as well as litigation of both civil and criminal cases for collection of debt.

### Stress Testing

Credit Risk stress testing is a regular exercise. Bank's credit exposures including funded and non-funded facilities are subjected to stress tests. This exercise is conducted on a quarterly basis through assigning shocks to all assets of the Bank and assessing its resulting affect on capital adequacy inline with SBP requirements.

#### 45.1.1 Lendings to financial institutions

##### Credit risk by public / private sector

|                    | Gross lendings   |           | Non - performing lendings |      | Provision hold |      |
|--------------------|------------------|-----------|---------------------------|------|----------------|------|
|                    | 2020             | 2019      | 2020                      | 2019 | 2020           | 2019 |
|                    | (Rupees in '000) |           |                           |      |                |      |
| Public/ Government | 15,975,261       | 209,206   | -                         | -    | -              | -    |
| Private            | 1,164,192        | 880,852   | -                         | -    | -              | -    |
|                    | 17,139,453       | 1,090,058 | -                         | -    | -              | -    |

#### 45.1.2 Investment in debt securities

##### Credit risk by industry sector

|                                                     | Gross Investments |             | Non - performing Investments |         | Provision hold |         |
|-----------------------------------------------------|-------------------|-------------|------------------------------|---------|----------------|---------|
|                                                     | 2020              | 2019        | 2020                         | 2019    | 2020           | 2019    |
|                                                     | (Rupees in '000)  |             |                              |         |                |         |
| Chemical and pharmaceuticals                        | 1,750,000         | 1,750,000   | -                            | -       | -              | -       |
| Electricity, gas, steam and air conditioning supply | -                 | 101,933     | -                            | -       | -              | -       |
| Financials including government securities          | 971,996,914       | 712,505,023 | 118                          | 118     | 118            | 118     |
| Manufacture of cement                               | 285,000           | 285,000     | 285,000                      | 285,000 | 285,000        | 285,000 |
| Manufacture of sugar                                | 145,656           | 145,656     | 145,656                      | 145,656 | 145,656        | 72,828  |
| Manufacture of textiles                             | 53,531            | 53,531      | 53,531                       | 53,531  | 53,531         | 53,531  |
| Telecommunications                                  | -                 | 114,747     | -                            | 114,747 | -              | 114,747 |
| Others                                              | 6,154             | 7,682       | 6,154                        | 7,682   | 6,154          | 7,682   |
|                                                     | 974,237,255       | 714,963,572 | 490,459                      | 606,734 | 490,459        | 533,906 |
| <b>Credit risk by public / private sector</b>       |                   |             |                              |         |                |         |
| Public/ Government                                  | 963,820,326       | 703,333,310 | -                            | -       | -              | -       |
| Private                                             | 10,416,929        | 11,630,262  | 490,459                      | 606,734 | 490,459        | 533,906 |
|                                                     | 974,237,255       | 714,963,572 | 490,459                      | 606,734 | 490,459        | 533,906 |

# Notes To The Unconsolidated Financial Statements

For the year ended December 31, 2020

## 45.1.3 Advances

### Credit risk by industry sector

|                                                             | Gross Advances   |             | Non - performing Advances |            | Provision hold |            |
|-------------------------------------------------------------|------------------|-------------|---------------------------|------------|----------------|------------|
|                                                             | 2020             | 2019        | 2020                      | 2019       | 2020           | 2019       |
|                                                             | (Rupees in '000) |             |                           |            |                |            |
| Agriculture, forestry and fishing                           | 5,122,317        | 6,209,291   | 477,421                   | 390,080    | 437,355        | 362,867    |
| Construction                                                | 18,081,634       | 18,950,532  | 289,791                   | 289,435    | 278,464        | 287,840    |
| Electricity, gas, steam and air conditioning supply         | 37,521,494       | 42,221,235  | 376,717                   | 379,846    | 374,996        | 378,125    |
| Electronics and electrical appliances                       | 5,842,215        | 4,322,348   | 102,262                   | 113,496    | 101,825        | 107,776    |
| Financials                                                  | 17,534,127       | 20,897,873  | 462,665                   | 532,286    | 462,665        | 532,286    |
| Footwear and Leather garments                               | 3,778,108        | 4,357,262   | 170,131                   | 173,985    | 169,736        | 173,590    |
| Human health and social work activities                     | 922,333          | 2,760,760   | 45,596                    | 50,211     | 34,973         | 34,981     |
| Individuals                                                 | 43,906,423       | 39,528,041  | 4,316,081                 | 4,377,113  | 3,911,755      | 3,999,488  |
| Manufacture of basic metals and metal products              | 14,913,709       | 16,420,515  | 3,028,467                 | 3,104,026  | 3,018,387      | 2,892,814  |
| Manufacture of cement                                       | 9,742,405        | 10,344,007  | 392,862                   | 392,862    | 392,862        | 392,862    |
| Manufacture of chemicals and pharmaceutical products        | 42,384,893       | 45,734,806  | 275,980                   | 334,485    | 273,047        | 331,551    |
| Manufacture of coke and refined petroleum products          | 4,982,529        | 14,789,736  | 412,061                   | 399,317    | 411,445        | 398,701    |
| Manufacture of food & beverages products                    | 39,631,918       | 51,582,644  | 3,274,437                 | 3,014,962  | 3,058,910      | 2,786,691  |
| Manufacture of machinery, equipment and transport Equipment | 2,182,220        | 4,100,112   | 433,943                   | 435,301    | 396,551        | 434,527    |
| Manufacture of rubber and plastics products                 | 4,034,047        | 5,020,189   | 665,778                   | 661,498    | 662,506        | 658,226    |
| Manufacture of sugar                                        | 33,283,221       | 23,116,287  | 4,658,087                 | 4,497,643  | 4,655,219      | 3,434,211  |
| Manufacture of textiles                                     | 76,794,166       | 78,774,991  | 13,475,285                | 13,537,492 | 13,322,828     | 13,088,287 |
| Mining and quarrying                                        | 5,033,270        | 4,252,835   | 5,019                     | 7,286      | 5,019          | 7,286      |
| Manufacturing of Pulp, Paper, Paperboard                    | 2,492,010        | 3,778,008   | 179,539                   | 242,331    | 150,661        | 213,453    |
| Ship Breaking                                               | 5,520,548        | 4,916,424   | 4,348,014                 | 2,436,614  | 4,348,014      | 2,436,614  |
| Services                                                    | 10,353,488       | 10,694,258  | 464,150                   | 596,857    | 460,207        | 588,408    |
| Telecommunications                                          | 18,287,167       | 15,883,537  | 42,798                    | 42,798     | 42,798         | 42,798     |
| Transportation and storage                                  | 53,061,768       | 57,884,271  | 75,901                    | 93,955     | 66,253         | 84,307     |
| Wholesale and retail traders                                | 53,691,912       | 47,103,072  | 12,521,768                | 12,562,163 | 7,471,824      | 7,573,707  |
| Others                                                      | 4,452,280        | 6,394,182   | 694,294                   | 758,217    | 634,656        | 693,025    |
|                                                             | 513,550,202      | 540,037,216 | 51,189,047                | 49,424,259 | 45,142,956     | 41,934,421 |
| <b>Credit risk by public / private sector</b>               |                  |             |                           |            |                |            |
| Public/ Government                                          | 74,377,320       | 85,944,207  | 639,825                   | 639,825    | 639,825        | 639,825    |
| Private                                                     | 439,172,882      | 454,093,009 | 50,549,222                | 48,784,434 | 44,503,131     | 41,294,596 |
|                                                             | 513,550,202      | 540,037,216 | 51,189,047                | 49,424,259 | 45,142,956     | 41,934,421 |

## Notes To The Unconsolidated Financial Statements

For the year ended December 31, 2020

|                                                             | 2020               | 2019               |
|-------------------------------------------------------------|--------------------|--------------------|
|                                                             | (Rupees in '000)   |                    |
| <b>45.1.4 Contingencies and Commitments</b>                 |                    |                    |
| <b>Credit risk by industry sector</b>                       |                    |                    |
| Agriculture, forestry and fishing                           | 2,134,487          | 541,768            |
| Construction                                                | 20,639,681         | 27,382,939         |
| Electricity, gas, steam and air conditioning supply         | 24,907,422         | 16,080,103         |
| Electronics and electrical appliances                       | 4,968,549          | 3,145,057          |
| Financials                                                  | 390,150,887        | 579,135,125        |
| Footwear and Leather garments                               | 517,178            | 80,901             |
| Human health and social work activities                     | 1,612,922          | 409,816            |
| Individuals                                                 | 2,618,245          | 6,205,880          |
| Manufacture of basic metals and metal products              | 8,207,595          | 6,414,150          |
| Manufacture of cement                                       | 4,686,576          | 1,294,594          |
| Manufacture of chemicals and pharmaceutical products        | 25,507,582         | 19,042,481         |
| Manufacture of coke and refined petroleum products          | 8,129,298          | 15,218,033         |
| Manufacture of food & beverages products                    | 19,214,176         | 18,244,851         |
| Manufacture of machinery, equipment and transport Equipment | 8,946,430          | 6,755,084          |
| Manufacture of rubber and plastics products                 | 4,883,983          | 2,041,121          |
| Manufacture of sugar                                        | 3,939,151          | 3,640,983          |
| Manufacture of textiles                                     | 33,696,487         | 31,827,288         |
| Mining and quarrying                                        | 144,328            | 460,490            |
| Manufacturing of Pulp, Paper, Paperboard                    | 1,362,984          | 1,163,879          |
| Ship Breaking                                               | 412,969            | 498,050            |
| Services                                                    | 57,348,336         | 54,955,804         |
| Telecommunications                                          | 17,006,854         | 14,669,698         |
| Transportation and storage                                  | 10,643,212         | 3,394,704          |
| Wholesale and retail traders                                | 25,016,888         | 16,723,095         |
| Others                                                      | 37,342,163         | 21,820,876         |
|                                                             | <b>714,038,383</b> | <b>851,146,770</b> |
| <b>Credit risk by public / private sector</b>               |                    |                    |
| Public/ Government                                          | 216,856,696        | 321,606,927        |
| Private                                                     | 497,181,687        | 529,539,843        |
|                                                             | <b>714,038,383</b> | <b>851,146,770</b> |

### 45.1.5 Concentration of Advances

The bank top 10 exposures on the basis of total (funded and non-funded exposures) aggregated to Rs 235,823.529 million (2019: Rs. 236,769.236 million) are as following:

|                | 2020               | 2019               |
|----------------|--------------------|--------------------|
|                | (Rupees in '000)   |                    |
| Funded         | 75,373,723         | 80,717,454         |
| Non Funded     | 160,449,536        | 156,051,782        |
| Total Exposure | <b>235,823,259</b> | <b>236,769,236</b> |

The sanctioned limits against these top 10 exposures aggregated to Rs 311,201.617 million (2019: 291,923.228 million)

There is no provision against these top 10 exposures.

# Notes To The Unconsolidated Financial Statements

For the year ended December 31, 2020

## 45.1.6 Advances - Province/Region-wise Disbursement & Utilization

| Province/Region                | 2020               |                    |                    |                   |                   |                                  |                |
|--------------------------------|--------------------|--------------------|--------------------|-------------------|-------------------|----------------------------------|----------------|
|                                | Disbursements      |                    |                    | Utilization       |                   |                                  |                |
|                                | Punjab             | Sindh              | KPK including FATA | Balochistan       | Islamabad         | AJK including Gilgit Balochistan |                |
|                                | (Rupees in '000)   |                    |                    |                   |                   |                                  |                |
| Punjab                         | 419,237,388        | 374,143,233        | 37,128,846         | 6,191,473         | 337,087           | 1,436,749                        | -              |
| Sindh                          | 411,850,220        | 12,962,814         | 351,555,947        | 6,776,970         | 40,554,489        | -                                | -              |
| KPK including FATA             | 4,741,216          | 171,325            | -                  | 4,569,891         | -                 | -                                | -              |
| Balochistan                    | 1,676,862          | -                  | -                  | -                 | 1,676,862         | -                                | -              |
| Islamabad                      | 15,574,363         | 1,180,640          | -                  | 2,287,606         | -                 | 12,106,117                       | -              |
| AJK including Gilgit-Baltistan | 281,068            | 62,557             | -                  | -                 | -                 | -                                | 218,511        |
| <b>Total</b>                   | <b>853,361,117</b> | <b>388,520,569</b> | <b>388,684,793</b> | <b>19,825,940</b> | <b>42,568,438</b> | <b>13,542,866</b>                | <b>218,511</b> |

  

| Province/Region                | 2019                 |                    |                    |                   |                   |                                  |                |
|--------------------------------|----------------------|--------------------|--------------------|-------------------|-------------------|----------------------------------|----------------|
|                                | Disbursements        |                    |                    | Utilization       |                   |                                  |                |
|                                | Punjab               | Sindh              | KPK including FATA | Balochistan       | Islamabad         | AJK including Gilgit Balochistan |                |
|                                | (Rupees in '000)     |                    |                    |                   |                   |                                  |                |
| Punjab                         | 572,121,989          | 500,803,912        | 57,758,820         | 10,024,921        | 322,571           | 3,210,918                        | 847            |
| Sindh                          | 577,715,877          | 12,573,575         | 494,016,936        | 3,370,558         | 67,526,981        | 227,827                          | -              |
| KPK including FATA             | 5,441,928            | 67,761             | -                  | 5,374,167         | -                 | -                                | -              |
| Balochistan                    | 1,216,050            | -                  | -                  | -                 | 1,216,050         | -                                | -              |
| Islamabad                      | 32,691,486           | 3,470,284          | 227,242            | 1,782,828         | -                 | 27,135,929                       | 75,203         |
| AJK including Gilgit-Baltistan | 316,940              | 425                | -                  | -                 | -                 | -                                | 316,515        |
| <b>Total</b>                   | <b>1,189,504,270</b> | <b>516,915,957</b> | <b>552,002,998</b> | <b>20,552,474</b> | <b>69,065,602</b> | <b>30,574,674</b>                | <b>392,565</b> |

## 45.2 Market Risk

Market Risk arises from changes in market rates such as Interest Rates, Foreign Exchange Rates, Equity Prices, credit spreads and/or commodity prices as well as their correlations and volatilities resulting in a loss to earnings and capital. MCB is exposed to market risk primarily through its trading activities, which are centered in the Treasury and Foreign Exchange Group and the Capital Market Division. Market risk also arises from market-making, facilitation of client business and proprietary positions in equities, fixed income and interest rate products and foreign exchange, which exposes bank to interest rate risk, foreign exchange risk and equity price risk.

The Bank's Market Risk Management structure consists of Risk Management & Portfolio Review Committee (RM&PRC) of the Board, Management Credit and Risk Committee, ALCO and independent Market Risk Management Division reporting directly to Group Head Risk Management. Market Risk function works in close partnership with the business segments to identify and monitor market risks throughout the Bank and to define market risk policies and procedures. Market Risk seeks to facilitate efficient risk/return management decisions, reduce volatility in operating performance and provide transparency into the Bank's market risk profile for senior management, the Board of Directors and regulators. Market risk authority, including both approval of market risk limits and approval of market risks is vested in the ALCO.

In line with regulatory requirements, MCB has clearly defined, in its Global Risk Management policy, the positions which shall be subject to market risk. The definition covers the accounting classifications as well as positions booked by different business groups under "Available for Sale" category. The assets subject to trading book treatment are frequently, mostly on daily basis, valued and actively managed. The positions which does not fulfill the criteria of Trading book falls under the Banking Book and are treated as per SBP requirements.

## Notes To The Unconsolidated Financial Statements

For the year ended December 31, 2020

The Bank measures and manages Market Risk by using different risk parameters with combinations of various limits. Board approved Global Risk Management Policy provides guidelines for assuming controlled market risk, its monitoring and management. The approved limits are compared with the numbers generated by the market risk management systems based on the trading activity and the outstanding positions.

Besides conventional methods, the Bank also uses VaR (Value at Risk) technique for market risk assessment of positions assumed by its treasury and capital market groups. In-house based solutions are used for calculating mark to market value of positions and generating VaR (value at risk) and sensitivity numbers. Thresholds for different positions are established to compare the expected losses at a given confidence level and over a specified time horizon.

A framework of stress testing, scenario analysis and reverse stress tests covering both banking and trading books as per SBP guidelines is also in place. The results of the stress tests are reviewed by senior management and also reported to the SBP.

The Bank is also exposed to interest rate risk both in trading and banking books. Risk parameters along with the marked to market values of government securities held by the Bank's treasury are generated on daily basis. The risk parameters include duration, PVBP, and VaR on individual security basis as well as on portfolio basis. These reports are presented to the senior management for review on a daily basis.

### 45.2.1 Balance sheet split by trading and banking books

|                                       | 2020             |              |               | 2019         |              |               |
|---------------------------------------|------------------|--------------|---------------|--------------|--------------|---------------|
|                                       | Banking book     | Trading book | Total         | Banking book | Trading book | Total         |
|                                       | (Rupees in '000) |              |               |              |              |               |
| Cash and balances with treasury banks | 122,180,839      | -            | 122,180,839   | 132,704,797  | -            | 132,704,797   |
| Balances with other banks             | 24,030,328       | -            | 24,030,328    | 12,542,239   | -            | 12,542,239    |
| Lendings to financial institutions    | 17,139,453       | -            | 17,139,453    | 1,090,058    | -            | 1,090,058     |
| Investments                           | 29,521,903       | 986,347,545  | 1,015,869,448 | 46,902,418   | 701,862,084  | 748,764,502   |
| Advances                              | 462,941,787      | -            | 462,941,787   | 496,678,874  | -            | 496,678,874   |
| Fixed assets                          | 58,027,904       | -            | 58,027,904    | 58,271,245   | -            | 58,271,245    |
| Intangible assets                     | 938,458          | -            | 938,458       | 957,552      | -            | 957,552       |
| Other assets                          | 56,334,253       | -            | 56,334,253    | 64,142,748   | -            | 64,142,748    |
|                                       | 771,114,925      | 986,347,545  | 1,757,462,470 | 813,289,931  | 701,862,084  | 1,515,152,015 |

### 45.2.2 Foreign Exchange Risk

Foreign exchange risk exposes the bank to changes in the values of current holdings and future cash flows denominated in currencies other than home currency due to the exchange rate fluctuation and volatility. The types of instruments exposed to this risk include investments in foreign branches, foreign currency-denominated loans, foreign currency-denominated deposits, future cash flows in foreign currencies arising from foreign exchange transactions, etc.

The core objective of foreign exchange risk management is to ensure the foreign exchange exposure of the Bank remain within defined risk appetite and insulate bank against undue losses that may arise due to volatile movements in foreign exchange rates or interest rates.

Limit structure to manage Foreign exchange risk including gap limits on different tenors in major currencies are in place to control risk. Bank's net open position and foreign exchange exposure limit (FEEL) is monitored and reported on intra-day and day end basis. Foreign exchange risk parameters including VaR is generated and monitored on daily basis. Stress testing of foreign exchange portfolio and its reporting to senior management and RM&PRC of the Board is a regular feature.

# Notes To The Unconsolidated Financial Statements

For the year ended December 31, 2020

|                              | 2020                    |                              |                          |                               | 2019                    |                              |                          |                               |
|------------------------------|-------------------------|------------------------------|--------------------------|-------------------------------|-------------------------|------------------------------|--------------------------|-------------------------------|
|                              | Foreign currency Assets | Foreign currency liabilities | Off--balance sheet items | Net foreign currency exposure | Foreign currency Assets | Foreign currency liabilities | Off--balance sheet items | Net foreign currency exposure |
|                              | (Rupees in '000)        |                              |                          |                               |                         |                              |                          |                               |
| United States Dollar         | 44,103,967              | 54,985,985                   | 10,749,737               | (132,281)                     | 38,440,687              | 59,119,303                   | 21,719,452               | 1,040,836                     |
| Sri Lankan Rupees            | 144,228                 | -                            | -                        | 144,228                       | -                       | 164,290                      | 148,959                  | (15,331)                      |
| Arad Emirates Dirham         | -                       | 248,645                      | 39,598                   | (209,047)                     | 194,163                 | 949,404                      | 590,192                  | (165,049)                     |
| Euro                         | 2,433,944               | 6,576,870                    | 4,143,526                | 600                           | 3,187                   | 4,574,963                    | 4,564,076                | (7,700)                       |
| Great Britain Pound Sterling | 2,474,888               | 6,151,953                    | 3,637,777                | (39,288)                      | 35,160                  | 4,928,555                    | 4,822,148                | (71,247)                      |
| Japanese Yen                 | 22,226                  | 20                           | 22,007                   | 44,214                        | -                       | 4,498                        | 17,723                   | 13,225                        |
| Other currencies             | 323,737                 | -                            | 47,086                   | 370,823                       | 100,234                 | -                            | 31,769                   | 132,003                       |
|                              | 49,502,990              | 67,963,473                   | 18,639,731               | 179,249                       | 38,773,431              | 69,741,013                   | 31,894,319               | 926,737                       |

|                                                                            | 2020             |              | 2019         |              |
|----------------------------------------------------------------------------|------------------|--------------|--------------|--------------|
|                                                                            | Banking book     | Trading book | Banking book | Trading book |
|                                                                            | (Rupees in '000) |              |              |              |
| Impact of 1% change in foreign exchange rates on - Profit and loss account | -                | 1,792        | -            | 9,267        |

### 45.2.3 Equity position Risk

Bank's proprietary positions in the equity instruments exposes it to the equity price risk in its trading and banking books. Equity price risk is managed by applying trading limit, scrip-wise and portfolio wise nominal limits. VaR analysis and stress testing of the equity portfolio are also performed and reported to senior management on a daily basis. The stress test for equity price risk assesses the impact of the fall in the stock market index using certain assumptions. In addition to this stress testing, historical scenario analysis on equities is also performed periodically as advised by the State Bank of Pakistan through Guideline on Stress Testing.

|                                                                   | 2020             |     | 2019    |     |
|-------------------------------------------------------------------|------------------|-----|---------|-----|
|                                                                   | AFS              | HFT | AFS     | HFT |
|                                                                   | (Rupees in '000) |     |         |     |
| Impact of 5% change in equity prices on - Profit and loss account | -                | -   | -       | 656 |
| - Other comprehensive income                                      | 908,592          | -   | 744,981 | -   |

### 45.2.4 Yield / Interest Rate Risk in the Banking Book (IRRBB)-Basel II Specific

Yield/ Interest rate sensitivity position for on-balance sheet instruments is based on the earlier of contractual re-pricing or maturity date and for off-balance sheet instruments is based on settlement date.

The increase / (decrease) in earnings due to change in the interest rate is as follows:

|                                                                      | 2020             |              | 2019         |              |
|----------------------------------------------------------------------|------------------|--------------|--------------|--------------|
|                                                                      | Banking Book     | Trading Book | Banking Book | Trading Book |
|                                                                      | (Rupees in '000) |              |              |              |
| Impact of 1% increase in interest rates on - Profit and loss account | (3,987,679)      | 5,250,521    | (2,621,559)  | 2,609,306    |
| - Other comprehensive income                                         | -                | (7,497,582)  | -            | (6,716,523)  |

The Bank has classified Available for Sale investments as Trading in Basel-II.

# Notes To The Unconsolidated Financial Statements

For the year ended December 31, 2020

## 45.2.5 Mismatch of Interest Rate Sensitive Assets and Liabilities

|                                                       | Effective yield/interest rate | Total         | Exposed to Yield/Interest risk |                    |                    |                         |                   |                   |                   |                    | Non-interest bearing financial instruments |                |
|-------------------------------------------------------|-------------------------------|---------------|--------------------------------|--------------------|--------------------|-------------------------|-------------------|-------------------|-------------------|--------------------|--------------------------------------------|----------------|
|                                                       |                               |               | 2020                           |                    |                    |                         |                   |                   |                   |                    |                                            |                |
|                                                       |                               |               | Upto 1 month                   | Over 1 to 3 months | Over 3 to 6 months | Over 6 months to 1 year | Over 1 to 2 years | Over 2 to 3 years | Over 3 to 5 years | Over 5 to 10 years |                                            | Above 10 years |
| (Rupees in '000)                                      |                               |               |                                |                    |                    |                         |                   |                   |                   |                    |                                            |                |
| <b>On-balance sheet financial instruments</b>         |                               |               |                                |                    |                    |                         |                   |                   |                   |                    |                                            |                |
| <b>Assets</b>                                         |                               |               |                                |                    |                    |                         |                   |                   |                   |                    |                                            |                |
| Cash and balances with treasury banks                 | -                             | 122,180,839   | 6,810,656                      | -                  | -                  | -                       | -                 | -                 | -                 | -                  | -                                          | 115,370,183    |
| Balances with other banks                             | 0.21%                         | 24,030,328    | 2,556,166                      | 799,172            | -                  | -                       | -                 | -                 | -                 | -                  | -                                          | 20,674,990     |
| Lending to financial institutions                     | 7.27%                         | 17,139,453    | 17,139,453                     | -                  | -                  | -                       | -                 | -                 | -                 | -                  | -                                          | -              |
| Investments                                           | 10.77%                        | 1,015,869,448 | 179,084,505                    | 415,139,293        | 160,598,665        | 61,659,011              | 22,916,296        | 41,949,392        | 30,794,310        | 71,118,966         | -                                          | 32,609,000     |
| Advances                                              | 9.34%                         | 462,941,787   | 432,461,756                    | 6,982,362          | 3,401,653          | 1,931,754               | 3,619,904         | 1,742,088         | 4,803,725         | 1,859,527          | 6,139,018                                  | -              |
| Other assets                                          |                               | 46,267,752    | -                              | -                  | -                  | -                       | -                 | -                 | -                 | -                  | -                                          | 46,267,752     |
| <b>Liabilities</b>                                    |                               |               |                                |                    |                    |                         |                   |                   |                   |                    |                                            |                |
| Bills payable                                         |                               | 1,688,429,607 | 638,052,536                    | 422,920,827        | 164,000,338        | 63,590,765              | 26,536,200        | 49,691,460        | 35,598,035        | 72,978,483         | 6,139,018                                  | 214,921,925    |
| Borrowings                                            | 5.30%                         | 23,980,692    | 121,266,747                    | 8,214,674          | 5,044,522          | 1,813,871               | 8,382,537         | 2,571,133         | 4,831,690         | 11,876,359         | -                                          | 23,980,692     |
| Deposits and other accounts                           | 4.50%                         | 1,289,502,304 | 739,683,033                    | 212,243,238        | 13,630,588         | 30,543,903              | 1,998,833         | 115,810           | 1,689,628         | 212,000            | -                                          | 489,385,271    |
| Other liabilities                                     |                               | 60,731,156    | -                              | -                  | -                  | -                       | -                 | -                 | -                 | -                  | -                                          | 60,731,156     |
| <b>On-balance sheet gap</b>                           |                               |               |                                |                    |                    |                         |                   |                   |                   |                    |                                            |                |
| <b>Off-balance sheet financial instruments</b>        |                               |               |                                |                    |                    |                         |                   |                   |                   |                    |                                            |                |
| FX options purchase                                   |                               | 182,800       | 122,370                        | 60,430             | -                  | -                       | -                 | -                 | -                 | -                  | -                                          | -              |
| Forward purchase of Government securities             |                               | 11,089,775    | 11,089,775                     | -                  | -                  | -                       | -                 | -                 | -                 | -                  | -                                          | -              |
| Cross Currency Swaps purchase                         |                               | 1,975,311     | 339,938                        | -                  | 210,505            | 87,318                  | 547,272           | -                 | 790,278           | -                  | -                                          | -              |
| Interest Rate Swaps purchase                          |                               | -             | -                              | -                  | -                  | -                       | -                 | -                 | -                 | -                  | -                                          | -              |
| Foreign exchange contracts purchase                   |                               | 168,432,858   | 69,994,741                     | 64,922,148         | 24,944,134         | 8,571,835               | -                 | -                 | -                 | -                  | -                                          | -              |
| FX options sale                                       |                               | 181,660,744   | 81,546,824                     | 64,982,578         | 25,154,639         | 8,659,163               | 547,272           | -                 | 790,278           | -                  | -                                          | -              |
| Forward sale of Government securities                 |                               | 182,800       | 122,370                        | 60,430             | -                  | -                       | -                 | -                 | -                 | -                  | -                                          | -              |
| Cross Currency Swaps sale                             |                               | 2,130,472     | 340,109                        | -                  | 210,505            | 242,308                 | 547,272           | -                 | 790,278           | -                  | -                                          | -              |
| Foreign exchange contracts sale                       |                               | 149,987,717   | 52,355,290                     | 60,513,836         | 23,089,616         | 14,028,975              | -                 | -                 | -                 | -                  | -                                          | -              |
| <b>Off-balance sheet gap</b>                          |                               |               |                                |                    |                    |                         |                   |                   |                   |                    |                                            |                |
| <b>Total Yield/Interest Risk Sensitivity Gap</b>      |                               |               |                                |                    |                    |                         |                   |                   |                   |                    |                                            |                |
| <b>Cumulative Yield/Interest Risk Sensitivity Gap</b> |                               |               |                                |                    |                    |                         |                   |                   |                   |                    |                                            |                |

# Notes To The Unconsolidated Financial Statements

For the year ended December 31, 2020

2019

|                                                       | Effective yield/interest rate | Total         | Exposed to Yield/Interest risk |                    |                    |                         |                   |                   |                   |                    | Non-interest bearing financial instruments |                |               |
|-------------------------------------------------------|-------------------------------|---------------|--------------------------------|--------------------|--------------------|-------------------------|-------------------|-------------------|-------------------|--------------------|--------------------------------------------|----------------|---------------|
|                                                       |                               |               | (Rupees in '000)               |                    |                    |                         |                   |                   |                   |                    |                                            |                |               |
|                                                       |                               |               | Upto 1 month                   | Over 1 to 3 months | Over 3 to 6 months | Over 6 months to 1 year | Over 1 to 2 years | Over 2 to 3 years | Over 3 to 5 years | Over 5 to 10 years |                                            | Above 10 years |               |
| <b>On-balance sheet financial instruments</b>         |                               |               |                                |                    |                    |                         |                   |                   |                   |                    |                                            |                |               |
| <b>Assets</b>                                         |                               |               |                                |                    |                    |                         |                   |                   |                   |                    |                                            |                |               |
| Cash and balances with treasury banks                 | 0.70%                         | 132,704,797   | 10,517,551                     | -                  | -                  | -                       | -                 | -                 | -                 | -                  | -                                          | -              | 122,187,246   |
| Balances with other banks                             | 0.55%                         | 12,542,239    | 2,805,338                      | 1,340,374          | -                  | -                       | -                 | -                 | -                 | -                  | -                                          | -              | 8,396,527     |
| Lending to financial institutions                     | 10.91%                        | 1,090,038     | 1,090,038                      | -                  | -                  | -                       | -                 | -                 | -                 | -                  | -                                          | -              | -             |
| Investments                                           | 11.47%                        | 748,764,502   | 180,617,919                    | 47,610,581         | 43,392,286         | 186,216,768             | 104,446,954       | 13,359,230        | 60,307,907        | 89,531,045         | -                                          | -              | 29,281,822    |
| Advances                                              | 11.70%                        | 496,678,874   | 465,897,240                    | 13,865,557         | 2,430,422          | 980,072                 | 1,816,256         | 3,009,684         | 1,481,043         | 1,754,233          | 5,444,367                                  | -              | 52,808,501    |
| Other assets                                          |                               | 52,808,501    | -                              | -                  | -                  | -                       | -                 | -                 | -                 | -                  | -                                          | -              | 52,808,501    |
|                                                       |                               | 1,444,588,971 | 660,928,106                    | 62,816,512         | 45,822,708         | 187,196,830             | 106,263,210       | 16,388,914        | 61,788,950        | 85,265,278         | 5,444,367                                  | -              | 212,674,096   |
| <b>Liabilities</b>                                    |                               |               |                                |                    |                    |                         |                   |                   |                   |                    |                                            |                |               |
| Bills payable                                         |                               | 11,821,698    | -                              | -                  | -                  | -                       | -                 | -                 | -                 | -                  | -                                          | -              | 11,821,698    |
| Borrowings                                            | 7.84%                         | 89,505,892    | 54,865,233                     | 9,993,161          | 7,185,921          | 1,467,529               | 2,097,344         | 2,217,657         | 3,572,934         | 8,106,113          | -                                          | -              | -             |
| Deposits and other accounts                           | 5.96%                         | 1,144,763,259 | 631,437,026                    | 35,105,817         | 22,527,727         | 24,408,630              | 3,459,232         | 2,002,175         | 1,270,783         | -                  | -                                          | -              | 424,551,869   |
| Other liabilities                                     |                               | 76,717,784    | -                              | -                  | -                  | -                       | -                 | -                 | -                 | -                  | -                                          | -              | 76,717,784    |
|                                                       |                               | 1,322,808,633 | 686,302,259                    | 45,098,978         | 29,713,648         | 25,876,159              | 5,556,576         | 4,219,832         | 4,843,717         | 8,106,113          | -                                          | -              | 513,091,351   |
| <b>On-balance sheet gap</b>                           |                               | 121,780,338   | (25,374,153)                   | 17,717,534         | 16,109,060         | 161,320,671             | 100,706,634       | 12,149,082        | 56,945,233        | 77,179,165         | 5,444,367                                  | -              | (300,417,255) |
| <b>Off-balance sheet financial instruments</b>        |                               |               |                                |                    |                    |                         |                   |                   |                   |                    |                                            |                |               |
| FX options purchase                                   |                               | 431,449       | 204,798                        | 226,651            | -                  | -                       | -                 | -                 | -                 | -                  | -                                          | -              | -             |
| Outright purchase of Government Securities            |                               | 82,284,304    | 82,284,304                     | -                  | -                  | -                       | -                 | -                 | -                 | -                  | -                                          | -              | -             |
| Cross currency swaps - purchase                       |                               | 4,428,683     | -                              | 311,405            | -                  | 765,490                 | 1,522,069         | 857,049           | 972,650           | -                  | -                                          | -              | -             |
| Interest Rate Swaps - purchase                        |                               | 316,500       | -                              | -                  | -                  | 316,500                 | -                 | -                 | -                 | -                  | -                                          | -              | -             |
| Foreign exchange contracts purchase                   |                               | 217,909,539   | 82,724,358                     | 85,102,271         | 45,299,680         | 4,683,230               | -                 | -                 | -                 | -                  | -                                          | -              | -             |
|                                                       |                               | 305,270,455   | 165,213,460                    | 85,640,327         | 45,299,680         | 5,765,220               | 1,522,069         | 857,049           | 972,650           | -                  | -                                          | -              | -             |
| FX options sale                                       |                               | 431,449       | 204,798                        | 226,651            | -                  | -                       | -                 | -                 | -                 | -                  | -                                          | -              | -             |
| Forward sale of Government securities                 |                               | 5,412,334     | 5,412,334                      | -                  | -                  | -                       | -                 | -                 | -                 | -                  | -                                          | -              | -             |
| Cross Currency Swaps - sale                           |                               | 4,636,745     | -                              | 311,405            | 52,745             | 765,490                 | 1,677,406         | 857,049           | 972,650           | -                  | -                                          | -              | -             |
| Foreign exchange contracts sale                       |                               | 187,805,779   | 68,703,212                     | 67,523,912         | 50,136,189         | 1,442,456               | -                 | -                 | -                 | -                  | -                                          | -              | -             |
|                                                       |                               | 198,286,307   | 74,320,344                     | 68,061,968         | 50,188,944         | 2,207,946               | 1,677,406         | 857,049           | 972,650           | -                  | -                                          | -              | -             |
| <b>Off-balance sheet gap</b>                          |                               | 106,984,148   | 90,883,116                     | 17,578,359         | (4,889,264)        | 3,557,274               | (155,337)         | -                 | -                 | -                  | -                                          | -              | -             |
| <b>Total Yield/Interest Risk Sensitivity Gap</b>      |                               | 65,518,963    | 35,295,893                     | 11,219,796         | 164,877,945        | 100,551,297             | 12,149,082        | 56,945,233        | 77,179,165        | 5,444,367          | -                                          | -              | -             |
| <b>Cumulative Yield/Interest Risk Sensitivity Gap</b> |                               | 65,518,963    | 100,814,856                    | 112,034,652        | 276,912,597        | 377,468,894             | 389,612,976       | 446,558,209       | 523,737,374       | 529,181,741        | -                                          | -              | -             |



# Notes To The Unconsolidated Financial Statements

For the year ended December 31, 2020

|                                       | 2020<br>(Rupees in '000) | 2019<br>(Rupees in '000) |
|---------------------------------------|--------------------------|--------------------------|
| <b>Reconciliation to total assets</b> |                          |                          |
| <b>Balance as per balance sheet</b>   | 1,757,462,470            | 1,515,152,015            |
| Less: Non financial assets            |                          |                          |
| Fixed assets                          | 58,027,904               | 58,271,245               |
| Intangible assets                     | 938,458                  | 957,552                  |
| Other assets                          | 10,066,501               | 11,334,247               |
| <b>Total financial assets</b>         | <b>69,032,863</b>        | <b>70,563,044</b>        |
|                                       | 1,688,429,607            | 1,444,588,971            |
| <b>Reconciliation to total assets</b> |                          |                          |
| <b>Balance as per balance sheet</b>   | 1,567,360,515            | 1,346,237,232            |
| Less: Non financial liabilities       |                          |                          |
| Other liabilities                     | 22,169,672               | 17,577,954               |
| Deferred tax liability                | 6,975,158                | 5,850,645                |
| <b>Total financial liabilities</b>    | <b>29,144,830</b>        | <b>23,428,599</b>        |
|                                       | 1,538,215,685            | 1,322,808,633            |

Yield risk is the risk of decline in earnings due to adverse movement of the yield curve.

Interest rate risk is the risk that the value of the financial instrument will fluctuate due to changes in the market interest rates.

## 45.3 Operational Risk

Operational risk is the risk of loss resulting from inadequate or failed internal processes, people, and systems or from external events. This definition includes legal risks but excludes strategic and reputational risks.

The Bank's operational risk management framework, as laid down in the Global Risk Management Policy, duly approved by BOD, is flexible enough to implement in stages and permits the overall risk management approach to evolve in the light of organizational learning and the future needs of the Bank. Operational loss events are reviewed and appropriate corrective actions taken on an ongoing basis, including measures to improve control procedures with respect to design and operative effectiveness.

Operational Risk Management helps the Bank understand risks and improve mitigating controls so as to minimize operational risks that are inherent in almost all areas of the Bank. Going forward, the Bank will further strengthen its risk function, policies and procedures to facilitate its operations and improve quality of assets to safeguard interest of depositors.

### 45.3.1 Operational Risk-Disclosures Basel II Specific

Currently, the bank is reporting operational risk capital charge under Basic Indicator Approach (BIA). The Bank took a number of initiative with respect to operational risk management like using Key Risk Indicators (Kris), Loss events database and Risk & Control Self Assessments (ROSA) to manage its operational risk effectively.

In accordance with the Operational Risk Management (OR) regulations, policy and framework, a database covering operational risk events is being maintained using a state of the art software solution, which has enhanced features and a better workflow management. This new software has further augmented bank's capacity to capture and report operational risk events and Kris. The software is also capable of generating periodical regulatory and management reports. Periodical updates on Operational Risk events are presented to senior management and the Risk Management and Portfolio Review Committee of the Board.

# Notes To The Unconsolidated Financial Statements

For the year ended December 31, 2020

## 45.4 Liquidity Risk

Liquidity represents the ability to fund assets and meet obligations as they become due. The Bank understands that liquidity does not come for free, and surplus liquidity has an opportunity cost which needs to be recognized. Liquidity risk is a risk of not being able to obtain funds at a reasonable price within a reasonable time period to meet obligations as they become due. Liquidity is essential to the ability to operate financial services businesses and, therefore, the ability to maintain surplus levels of liquidity through economic cycles is crucial. Particularly during periods of adverse conditions, liquidity management is among the most important activities that the MCB conducts during both normal and stress periods. MCB recognizes that liquidity risk can arise from the Bank's activities and can be grouped into three categories:

- Inflows/Outflows from on-balance sheet items (other than marketable securities and wholesale borrowings) and off-balance sheet items;
- Marketability of trading securities; and
- Capacity to borrow from the wholesale markets for funding as well as trading activities.

### Liquidity Management

The Asset Liability Management Committee of the bank has the responsibility for the formulation of overall strategy and oversight of the Asset Liability Management function. Board has approved a comprehensive Liquidity Risk Policy (part of Risk Management Policy), which stipulates policies regarding maintenance of various ratios, funding preferences, and evaluation of Banks' liquidity under normal and stress scenarios. A framework to assess the maturity profile of non-contractual assets and liabilities is in place to supplement the liquidity management. Bank's comprehensive liquidity management framework assists it to closely watch the liquidity position through monitoring of early warning indicators and stress testing, to ensure effective and timely decision making.

MCB's liquidity risk management framework is designed to identify measure and manage in a timely manner the liquidity risk position of the Bank. The underlying policies and procedures include: Global Risk Management policy, Global Treasury Policy, Investment policy, Contingency Funding Plan, Liquidity Strategy and Limit Structure which are reviewed and approved regularly by the senior management / Board members. Moreover; the Bank also prepares a 'Contingency Funding Plan' (CFP) to address liquidity issues in time of stress/crisis situation containing early warning indicators to pre-empt unforeseen liquidity crises. MCB Bank conducts Liquidity Risk Analysis on regular basis as well as Maturity of gaps are also reviewed in order to ensure diversification in terms of tenors. MCB liquidity risk framework envisages to project the Bank's funding position during temporary and long-term liquidity changes, including those caused by liability erosion and explicitly identifying quantifying and ranking all sources of funding preferences, such as reducing assets, modifying or increasing liability structure; and using other alternatives for controlling statement of financial position changes. MCB performs regular liquidity stress tests as part of its liquidity monitoring activities. The purpose of the liquidity stress tests is intended to ensure sufficient liquidity for the Bank under both idiosyncratic and systemic market stress conditions. MCB's liquidity risk management approach involves intraday liquidity management, managing funding sources and evaluation of structural imbalances in balance sheet structure.

In view of the relaxation granted by SBP for deferral of principal and markup and for rescheduling / restructuring of loans there will be an impact on the maturity profile of the Bank. The Asset and Liability Committee (ALCO) of the Bank is monitoring the liquidity position and the Bank is confident that the liquidity buffer currently maintained is sufficient to cater to any adverse movement in the cash flow maturity profile.

### Liquidity Management:

In view of the relaxation granted by SBP for deferral of principal and markup and for rescheduling / restructuring of loans there will be an impact on the maturity profile of the Bank. The Asset and Liability Committee (ALCO) of the Bank is monitoring the liquidity position and the Bank is confident that the liquidity buffer currently maintained is sufficient to cater to any adverse movement in the cash flow maturity profile

### Intraday Liquidity Management

Intraday liquidity management is about managing the daily payments and cash flows. Bank has policies to ensure that sufficient cash is maintained during the day to make payments through local payment system. The policy of the Bank is to maintain adequate liquidity at all times, in all geographical locations and for all currencies and hence to be in a position, in the normal course of business, to meet obligations, repay depositors and fulfill commitments.

### Managing Funding Sources

Managing funding sources, as per policy MCB maintain a portfolio of marketable securities that can either be sold outright or sold through a repurchase agreement to generate cash flows for meeting unexpected liquidity requirement. As a part of liquidity management MCB maintains borrowing relationships to ensure the continued access to diverse market of funding sources. MCB's sound credit rating together with excellent market reputation has enabled MCB to secure ample call lines with local and foreign banks. The level of liquidity reserves as per regulatory requirements also mitigates risks. MCB's investment in marketable securities is much higher than the Statutory Liquidity requirements.

## Notes To The Unconsolidated Financial Statements

For the year ended December 31, 2020

### 45.4.1 Maturities of Assets and Liabilities - based on contractual maturity of the assets and liabilities of the Bank

2020

|                                          | Upto 1<br>day | Over 1 to<br>7 days | Over 7 to<br>14 days | Over 14 days<br>to 1 month | Over 1 or<br>2 months | Over 2 to<br>3 months | Over 3 to<br>6 months | Over 6 to<br>9 months | Over 9<br>months<br>to 1 year | Over 1 to<br>2 years | Over 2 to<br>3 years | Over 3 to<br>5 years | Over 5<br>years |
|------------------------------------------|---------------|---------------------|----------------------|----------------------------|-----------------------|-----------------------|-----------------------|-----------------------|-------------------------------|----------------------|----------------------|----------------------|-----------------|
| (Rupees in '000)                         |               |                     |                      |                            |                       |                       |                       |                       |                               |                      |                      |                      |                 |
| <b>Assets</b>                            |               |                     |                      |                            |                       |                       |                       |                       |                               |                      |                      |                      |                 |
| Cash and balances with<br>treasury banks | 122,180,839   | -                   | -                    | -                          | -                     | -                     | -                     | -                     | -                             | -                    | -                    | -                    | -               |
| Balances with other banks                | 24,030,328    | 639,225             | -                    | 799,031                    | -                     | 799,031               | -                     | -                     | -                             | -                    | -                    | -                    | -               |
| Lending to financial institutions        | 17,139,453    | 15,275,261          | -                    | -                          | -                     | -                     | -                     | -                     | -                             | -                    | -                    | -                    | -               |
| Investments                              | 1,015,869,448 | 1,032,330           | 680,200              | 72,188,252                 | 159,114,738           | 179,247,663           | 114,811,198           | 60,862,579            | 5,059,417                     | 28,051,162           | 75,507,721           | 36,666,731           | 180,909,667     |
| Advances                                 | 462,941,787   | 69,434,527          | 16,280,888           | 21,964,456                 | 20,382,678            | 31,484,973            | 53,402,604            | 34,512,637            | 28,348,910                    | 51,224,268           | 36,344,592           | 56,301,425           | 37,691,881      |
| Fixed assets                             | 58,027,904    | 46,800              | 54,601               | 218,707                    | 327,908               | 327,908               | 983,725               | 983,725               | 983,725                       | 3,528,643            | 3,562,702            | 4,097,577            | 42,904,084      |
| Intangible assets                        | 998,458       | 1,979               | 13,857               | 31,674                     | 59,389                | 59,389                | 178,167               | 178,167               | 178,167                       | 225,791              | -                    | -                    | -               |
| Deferred tax assets                      | 2,782,530     | 7,623               | 53,364               | 129,897                    | 221,078               | 236,324               | 693,727               | 701,350               | 693,727                       | 2,260,624            | 6,419,673            | 10,637,500           | -               |
| Other assets                             | 56,334,253    | 1,680,408           | 7,443,870            | 6,023,597                  | 9,571,753             | 9,856,338             | 1,992,478             | 579,658               | 83,001                        | -                    | -                    | -                    | -               |
|                                          | 1,760,245,000 | 216,437,683         | 104,861,410          | 101,355,314                | 189,677,544           | 221,511,626           | 172,061,899           | 97,818,116            | 35,346,947                    | 85,290,488           | 121,634,688          | 107,903,233          | 271,505,652     |
| <b>Liabilities</b>                       |               |                     |                      |                            |                       |                       |                       |                       |                               |                      |                      |                      |                 |
| Bills payable                            | 23,980,692    | 4,796,138           | 5,595,495            | 12,789,702                 | -                     | -                     | -                     | -                     | -                             | -                    | -                    | -                    | -               |
| Borrowings                               | 164,001,533   | 27,145,780          | 1,537,110            | 1,338,623                  | 6,239,388             | 1,975,286             | 5,044,522             | 924,633               | 889,239                       | 8,382,537            | 2,571,133            | 4,831,690            | 11,876,359      |
| Deposits and other accounts              | 1,289,502,304 | 3,244,480           | 5,172,564            | 11,883,056                 | 11,137,355            | 10,105,884            | 13,630,588            | 17,256,524            | 13,285,379                    | 1,998,833            | 115,810              | 1,689,628            | 212,000         |
| Deferred tax liabilities                 | 9,757,688     | 33,174              | 30,030               | 3,668                      | 127,642               | 20,372                | 85,781                | 726,634               | 196,315                       | 655,206              | 1,911,154            | 2,455,143            | 3,477,402       |
| Other liabilities                        | 82,900,828    | 11,993,186          | 3,496,367            | 5,147,109                  | 5,633,265             | 5,961,832             | 13,433,608            | 2,147,942             | 2,087,801                     | 3,880,245            | 7,956,617            | 15,387,832           | 3,913,030       |
|                                          | 1,570,143,045 | 1,239,739,700       | 15,831,566           | 31,162,158                 | 23,037,650            | 18,063,374            | 32,194,499            | 21,057,733            | 16,458,734                    | 14,916,821           | 12,554,714           | 24,364,293           | 19,478,791      |
| <b>Net assets</b>                        | 190,101,955   | (68,642,612)        | 89,029,844           | 70,193,156                 | 166,639,894           | 203,446,252           | 139,867,400           | 76,760,383            | 18,888,213                    | 70,373,667           | 109,279,974          | 83,538,940           | 252,026,861     |
| Share capital                            | 11,850,600    |                     |                      |                            |                       |                       |                       |                       |                               |                      |                      |                      |                 |
| Reserves                                 | 80,696,335    |                     |                      |                            |                       |                       |                       |                       |                               |                      |                      |                      |                 |
| Surplus on revaluation of assets         | 27,720,418    |                     |                      |                            |                       |                       |                       |                       |                               |                      |                      |                      |                 |
| Unappropriated profit                    | 69,834,602    |                     |                      |                            |                       |                       |                       |                       |                               |                      |                      |                      |                 |
|                                          | 190,101,955   |                     |                      |                            |                       |                       |                       |                       |                               |                      |                      |                      |                 |

# Notes To The Unconsolidated Financial Statements

For the year ended December 31, 2020

|                                       |                      | 2019                 |                   |                   |                          |                    |                    |                    |                    |                          |                   |                    |                    |              |  |
|---------------------------------------|----------------------|----------------------|-------------------|-------------------|--------------------------|--------------------|--------------------|--------------------|--------------------|--------------------------|-------------------|--------------------|--------------------|--------------|--|
|                                       |                      | Upto 1 day           | Over 1 to 7 days  | Over 14 days      | Over 14 days to 1 months | Over 1 or 2 months | Over 2 to 3 months | Over 3 to 6 months | Over 6 to 9 months | Over 9 months to 1 years | Over 1 to 2 years | Over 2 to 3 years  | Over 3 to 5 years  | Over 5 years |  |
|                                       |                      | (Rupees in '000)     |                   |                   |                          |                    |                    |                    |                    |                          |                   |                    |                    |              |  |
| <b>Assets</b>                         |                      |                      |                   |                   |                          |                    |                    |                    |                    |                          |                   |                    |                    |              |  |
| Cash and balances with treasury banks |                      |                      |                   |                   |                          |                    |                    |                    |                    |                          |                   |                    |                    |              |  |
|                                       | 132,704,797          | 132,704,797          | -                 | -                 | -                        | -                  | -                  | -                  | -                  | -                        | -                 | -                  | -                  | -            |  |
| Balances with other banks             |                      |                      |                   |                   |                          |                    |                    |                    |                    |                          |                   |                    |                    |              |  |
|                                       | 12,542,239           | 8,879,536            | 541,582           | 696,814           | 1,340,374                | -                  | -                  | -                  | -                  | -                        | -                 | -                  | -                  | -            |  |
| Lending to financial institutions     |                      |                      |                   |                   |                          |                    |                    |                    |                    |                          |                   |                    |                    |              |  |
|                                       | 1,090,058            | 209,206              | -                 | 880,852           | -                        | -                  | -                  | -                  | -                  | -                        | -                 | -                  | -                  | -            |  |
| Investments                           |                      |                      |                   |                   |                          |                    |                    |                    |                    |                          |                   |                    |                    |              |  |
|                                       | 748,764,502          | 523,435              | 12,011,605        | 165,746,557       | 4,146,532                | 38,619,156         | 37,874,254         | 101,658,052        | 85,835,490         | 109,566,556              | 17,164,625        | 64,933,046         | 109,289,651        |              |  |
| Advances                              |                      |                      |                   |                   |                          |                    |                    |                    |                    |                          |                   |                    |                    |              |  |
|                                       | 496,678,874          | 112,864,577          | 10,898,866        | 33,566,678        | 22,988,288               | 27,545,204         | 55,225,422         | 25,931,037         | 35,055,991         | 42,508,022               | 34,030,023        | 46,800,437         | 39,631,154         |              |  |
| Fixed assets                          |                      |                      |                   |                   |                          |                    |                    |                    |                    |                          |                   |                    |                    |              |  |
|                                       | 58,271,245           | 8,032                | 48,204            | 22,491            | 336,966                  | 336,966            | 1,010,898          | 1,010,898          | 154,441            | 301,022                  | 38,766            | -                  | -                  |              |  |
| Intangible assets                     |                      |                      |                   |                   |                          |                    |                    |                    |                    |                          |                   |                    |                    |              |  |
|                                       | 957,552              | 1,717                | 10,296            | 27,456            | 51,490                   | 51,480             | 154,441            | 154,441            | 430,140            | -                        | -                 | -                  | -                  |              |  |
| Deferred tax assets                   |                      |                      |                   |                   |                          |                    |                    |                    |                    |                          |                   |                    |                    |              |  |
|                                       | 1,725,288            | 4,727                | 28,361            | 80,356            | 137,078                  | 146,531            | 430,140            | 434,867            | 430,140            | -                        | -                 | -                  | -                  |              |  |
| Other assets                          |                      |                      |                   |                   |                          |                    |                    |                    |                    |                          |                   |                    |                    |              |  |
|                                       | 64,142,748           | 189,805              | 3,239,882         | 7,376,794         | 12,172,177               | 13,452,420         | 3,216,119          | 3,261,953          | 1,214,143          | 2,141,963                | 56,780,052        | 126,116,465        | 192,197,076        |              |  |
|                                       | <b>1,516,877,303</b> | <b>255,385,632</b>   | <b>26,778,796</b> | <b>19,808,064</b> | <b>208,599,998</b>       | <b>41,172,895</b>  | <b>97,911,274</b>  | <b>132,451,248</b> | <b>122,659,274</b> | <b>158,864,552</b>       | <b>56,780,052</b> | <b>126,116,465</b> | <b>192,197,076</b> |              |  |
| <b>Liabilities</b>                    |                      |                      |                   |                   |                          |                    |                    |                    |                    |                          |                   |                    |                    |              |  |
| Bills payable                         |                      |                      |                   |                   |                          |                    |                    |                    |                    |                          |                   |                    |                    |              |  |
|                                       | 11,821,698           | 394,056              | 2,364,340         | 6,304,906         | -                        | -                  | -                  | -                  | -                  | -                        | -                 | -                  | -                  |              |  |
| Borrowings                            |                      |                      |                   |                   |                          |                    |                    |                    |                    |                          |                   |                    |                    |              |  |
|                                       | 89,505,892           | 19,597,099           | 23,761,935        | 5,599,571         | 7,526,054                | 2,467,108          | 7,185,921          | 664,824            | 802,705            | 2,097,344                | 2,217,657         | 3,572,934          | 8,106,113          |              |  |
| Deposits and other accounts           |                      |                      |                   |                   |                          |                    |                    |                    |                    |                          |                   |                    |                    |              |  |
|                                       | 1,144,763,239        | 1,036,080,008        | 2,388,779         | 10,153,502        | 12,241,878               | 22,863,939         | 22,527,727         | 15,917,007         | 8,491,623          | 3,459,232                | 2,002,175         | 1,270,783          | -                  |              |  |
| Deferred tax liabilities              |                      |                      |                   |                   |                          |                    |                    |                    |                    |                          |                   |                    |                    |              |  |
|                                       | 7,575,933            | 10,648               | 16,036            | (35,127)          | 14,082                   | (101,995)          | 29,162             | 66,342             | (28,156)           | 588,296                  | 296,041           | 2,832,251          | 3,896,122          |              |  |
| Other liabilities                     |                      |                      |                   |                   |                          |                    |                    |                    |                    |                          |                   |                    |                    |              |  |
|                                       | 94,295,738           | 9,808,328            | 7,271,888         | 16,492,957        | 5,507,488                | 5,632,693          | 10,851,954         | 5,079,603          | 2,003,742          | 2,425,495                | 3,420,466         | 13,756,886         | 4,876,699          |              |  |
|                                       | <b>1,347,962,520</b> | <b>1,065,890,339</b> | <b>35,802,978</b> | <b>38,515,809</b> | <b>25,289,492</b>        | <b>31,061,745</b>  | <b>40,594,764</b>  | <b>21,727,776</b>  | <b>11,269,914</b>  | <b>8,550,367</b>         | <b>7,996,339</b>  | <b>21,432,854</b>  | <b>16,878,934</b>  |              |  |
| <b>Net assets</b>                     |                      |                      |                   |                   |                          |                    |                    |                    |                    |                          |                   |                    |                    |              |  |
|                                       | 168,914,783          | (810,504,507)        | (8,024,182)       | 170,084,189       | 15,883,403               | 49,090,012         | 57,316,510         | 110,723,472        | 111,389,360        | 146,314,185              | 48,843,713        | 104,683,631        | 175,318,142        |              |  |
| Share capital                         |                      |                      |                   |                   |                          |                    |                    |                    |                    |                          |                   |                    |                    |              |  |
|                                       | 11,850,600           | -                    | -                 | -                 | -                        | -                  | -                  | -                  | -                  | -                        | -                 | -                  | -                  |              |  |
| Reserves                              |                      |                      |                   |                   |                          |                    |                    |                    |                    |                          |                   |                    |                    |              |  |
|                                       | 77,591,253           | -                    | -                 | -                 | -                        | -                  | -                  | -                  | -                  | -                        | -                 | -                  | -                  |              |  |
| Surplus on revaluation of assets      |                      |                      |                   |                   |                          |                    |                    |                    |                    |                          |                   |                    |                    |              |  |
|                                       | 23,695,441           | -                    | -                 | -                 | -                        | -                  | -                  | -                  | -                  | -                        | -                 | -                  | -                  |              |  |
| Unappropriated profit                 |                      |                      |                   |                   |                          |                    |                    |                    |                    |                          |                   |                    |                    |              |  |
|                                       | 55,777,469           | -                    | -                 | -                 | -                        | -                  | -                  | -                  | -                  | -                        | -                 | -                  | -                  |              |  |
|                                       | <b>168,914,783</b>   | <b>-</b>             | <b>-</b>          | <b>-</b>          | <b>-</b>                 | <b>-</b>           | <b>-</b>           | <b>-</b>           | <b>-</b>           | <b>-</b>                 | <b>-</b>          | <b>-</b>           | <b>-</b>           |              |  |

# Notes To The Unconsolidated Financial Statements

For the year ended December 31, 2020

## 45.4.2 Maturities of assets and liabilities - based on expected maturities of the assets and liabilities of the Bank

2020

|                                       | Total         | Upto 1 month | Over 1 to 3 months | Over 3 to 6 months | Over 6 months to 1 year | Over 1 to 2 years | Over 2 to 3 years | Over 3 to 5 years | Over 5 to 10 years | Above 10 years |
|---------------------------------------|---------------|--------------|--------------------|--------------------|-------------------------|-------------------|-------------------|-------------------|--------------------|----------------|
| (Rupees in '000)                      |               |              |                    |                    |                         |                   |                   |                   |                    |                |
| <b>Assets</b>                         |               |              |                    |                    |                         |                   |                   |                   |                    |                |
| Cash and balances with treasury banks | 122,180,839   | 122,180,839  | -                  | -                  | -                       | -                 | -                 | -                 | -                  | -              |
| Balances with other banks             | 24,030,328    | 23,231,297   | 799,031            | -                  | -                       | -                 | -                 | -                 | -                  | -              |
| Lending to financial institutions     | 17,139,453    | 17,139,453   | -                  | -                  | -                       | -                 | -                 | -                 | -                  | -              |
| Investments                           | 1,015,869,448 | 165,626,376  | 338,357,141        | 114,805,937        | 65,897,443              | 28,013,808        | 75,470,367        | 36,564,210        | 175,676,689        | 15,457,477     |
| Advances                              | 462,941,787   | 69,597,045   | 32,217,300         | 27,688,757         | 49,069,203              | 79,509,554        | 66,966,890        | 82,943,687        | 46,065,324         | 8,904,027      |
| Fixed assets                          | 58,027,904    | 327,909      | 655,816            | 983,725            | 1,967,449               | 3,528,643         | 3,562,702         | 4,046,673         | 6,266,060          | 36,688,927     |
| Intangible assets                     | 938,458       | 59,388       | 118,778            | 178,167            | 356,334                 | 225,791           | -                 | -                 | -                  | -              |
| Deferred tax assets                   | 2,782,530     | 236,324      | 457,402            | 693,727            | 1,395,077               | -                 | -                 | -                 | -                  | -              |
| Other assets                          | 56,334,253    | 15,233,227   | 18,917,932         | 2,002,637          | 662,660                 | 2,260,624         | 6,419,673         | 10,837,500        | -                  | -              |
|                                       | 1,760,245,000 | 413,631,858  | 391,523,400        | 146,332,950        | 119,348,166             | 113,538,420       | 152,419,632       | 134,392,070       | 228,008,073        | 61,050,431     |
| <b>Liabilities</b>                    |               |              |                    |                    |                         |                   |                   |                   |                    |                |
| Bills payable                         | 23,980,692    | 23,980,692   | -                  | -                  | -                       | -                 | -                 | -                 | -                  | -              |
| Borrowings                            | 164,001,533   | 121,266,747  | 8,214,674          | 5,044,522          | 1,813,871               | 8,382,537         | 2,571,133         | 4,831,690         | 11,876,359         | -              |
| Deposits and other accounts           | 1,289,502,304 | 72,039,661   | 48,536,715         | 57,946,390         | 56,649,804              | 317,092,872       | 315,209,849       | 316,783,667       | 105,243,346        | -              |
| Deferred tax liabilities              | 9,757,688     | 103,420      | 147,968            | 85,470             | 921,877                 | 654,883           | 1,910,831         | 2,432,012         | 1,711,329          | 1,789,898      |
| Other liabilities                     | 82,900,828    | 22,598,657   | 11,491,122         | 13,437,582         | 4,235,743               | 3,880,245         | 7,956,617         | 15,387,832        | 3,451,697          | 461,333        |
|                                       | 1,570,143,045 | 239,989,177  | 68,390,479         | 76,513,964         | 63,621,295              | 330,010,537       | 327,648,430       | 339,435,201       | 122,282,731        | 2,251,231      |
| <b>Net assets</b>                     | 190,101,955   | 173,642,681  | 323,132,921        | 69,818,986         | 55,726,871              | (216,472,117)     | (175,228,798)     | (205,043,131)     | 105,725,342        | 58,799,200     |
| Share capital                         | 11,850,600    |              |                    |                    |                         |                   |                   |                   |                    |                |
| Reserves                              | 80,696,335    |              |                    |                    |                         |                   |                   |                   |                    |                |
| Surplus on revaluation of assets      | 27,720,418    |              |                    |                    |                         |                   |                   |                   |                    |                |
| Unappropriated profit                 | 69,834,602    |              |                    |                    |                         |                   |                   |                   |                    |                |
|                                       | 190,101,955   |              |                    |                    |                         |                   |                   |                   |                    |                |

# Notes To The Unconsolidated Financial Statements

For the year ended December 31, 2020

2019

|                                       | (Rupees in '000) |                    |                    |                         |                   |                   |                   |                    |                |
|---------------------------------------|------------------|--------------------|--------------------|-------------------------|-------------------|-------------------|-------------------|--------------------|----------------|
|                                       | Upto 1 month     | Over 1 to 3 months | Over 3 to 6 months | Over 6 months to 1 year | Over 1 to 2 years | Over 2 to 3 years | Over 3 to 5 years | Over 5 to 10 years | Above 10 years |
| <b>Assets</b>                         |                  |                    |                    |                         |                   |                   |                   |                    |                |
| Cash and balances with treasury banks | 132,704,797      | -                  | -                  | -                       | -                 | -                 | -                 | -                  | -              |
| Balances with other banks             | 12,542,239       | 1,340,374          | -                  | -                       | -                 | -                 | -                 | -                  | -              |
| Lending to financial institutions     | 1,090,068        | -                  | -                  | -                       | -                 | -                 | -                 | -                  | -              |
| Investments                           | 179,665,525      | 42,764,030         | 37,872,595         | 187,483,587             | 109,524,248       | 17,120,045        | 64,890,737        | 94,837,469         | 14,606,266     |
| Advances                              | 94,021,656       | 52,033,469         | 46,410,125         | 51,464,951              | 69,033,399        | 60,132,349        | 74,935,777        | 41,348,513         | 7,298,635      |
| Fixed assets                          | 336,965          | 577,984            | 1,106,846          | 2,021,795               | 3,274,809         | 2,124,651         | 5,551,924         | 6,047,543          | 37,228,728     |
| Intangible assets                     | 51,480           | 102,961            | 154,441            | 308,882                 | 301,022           | 38,766            | -                 | -                  | -              |
| Deferred tax assets                   | 146,532          | 283,609            | 430,140            | 865,007                 | -                 | -                 | -                 | -                  | -              |
| Other assets                          | 18,400,556       | 25,599,507         | 3,241,210          | 3,434,267               | 1,214,143         | 2,141,963         | 10,111,102        | -                  | -              |
|                                       | 1,516,877,303    | 437,619,434        | 89,215,357         | 245,578,489             | 183,347,621       | 81,557,774        | 155,489,540       | 142,233,525        | 59,133,629     |
| <b>Liabilities</b>                    |                  |                    |                    |                         |                   |                   |                   |                    |                |
| Bills payable                         | 11,821,698       | -                  | -                  | -                       | -                 | -                 | -                 | -                  | -              |
| Borrowings                            | 89,505,892       | 9,993,161          | 7,185,921          | 1,467,529               | 2,097,344         | 2,217,657         | 3,572,934         | 8,106,113          | -              |
| Deposits and other accounts           | 1,144,763,259    | 54,469,232         | 50,398,665         | 60,795,072              | 274,914,858       | 273,457,801       | 272,726,409       | 90,485,209         | -              |
| Deferred tax liabilities              | 7,575,933        | 3,780              | 28,760             | 37,225                  | 568,296           | 295,246           | 2,832,251         | 2,577,062          | 1,321,697      |
| Other liabilities                     | 94,295,738       | 40,540,731         | 10,855,453         | 7,079,846               | 2,425,495         | 3,420,466         | 13,756,886        | 4,338,448          | 538,252        |
|                                       | 1,347,962,520    | 174,747,455        | 68,488,799         | 69,379,672              | 280,005,993       | 279,391,170       | 292,888,480       | 105,506,832        | 1,859,949      |
| <b>Net assets</b>                     | 168,914,783      | 262,871,979        | 20,746,558         | 176,198,817             | (96,658,372)      | (197,833,396)     | (137,398,940)     | 36,726,693         | 57,273,680     |
| Share capital                         | 11,850,600       |                    |                    |                         |                   |                   |                   |                    |                |
| Reserves                              | 77,591,253       |                    |                    |                         |                   |                   |                   |                    |                |
| Surplus on revaluation of assets      | 23,695,441       |                    |                    |                         |                   |                   |                   |                    |                |
| Unappropriated profit                 | 55,777,489       |                    |                    |                         |                   |                   |                   |                    |                |
|                                       | 168,914,783      |                    |                    |                         |                   |                   |                   |                    |                |

## Liquidity Gap Reporting

When an asset or liability does not have any contractual maturity date, the period in which these are assumed to mature has been taken as the expected date of maturity. Bank regularly conducts an objective and systematic behavioral study using regression analysis technique to ascertain the maturity of its non-contractual assets and liabilities. Core and non-core parts of the non-contractual assets and liabilities are segregated through the behavioral study. Non Core part is placed among the short term maturity buckets i.e. up to 1 Year based on the model results, whereas core part is distributed among the longer terms buckets based on the discussion and decision by the ALCO. Following percentages are used to distribute the core assets and liabilities among longer term buckets:

|                    |     |
|--------------------|-----|
| Over 1 to 2 Years  | 30% |
| Over 2 to 3 Years  | 30% |
| Over 3 to 5 Years  | 30% |
| Over 5 to 10 Years | 10% |

# Notes To The Unconsolidated Financial Statements

For the year ended December 31, 2020

## 45.5 Derivative Risk

Most business clients have either interest rate exposures arising from debt financing or currency exposures arising out of commercial transactions from import and export of goods. Businesses face the risk of sudden movements in interest rates or foreign exchange rates that may adversely affect their profitability. MCB Bank provides solutions to this problem through its derivatives desk in major types of derivative instruments i.e.; forwards, futures, swaps and options. As an Authorized Derivative Dealer (ADD), MCB is an active participant in Derivative market and has flexibility in providing a broad range of derivatives products covering both hedging and market making to satisfy customers' needs. As an ADD, the bank offers derivative products which are permitted under the Financial Derivative Business Regulations (FDBR) or as permitted by the State Bank of Pakistan. Before executing Derivative transactions, the bank ensures that the clients understand the risk and reward associated with the derivative being offered. Derivative transactions are executed with appropriate clients only.

Risk management activities take place at the following different levels.

### Strategic Level:

By senior management Assets and Liabilities Management Committee (ALCO), Management Credit and Risk Committee (MC&RC) and the Board of Directors to institute a risk management framework and to ensure provision of all resources and support required for effective risk management on Bank-wide basis. The Board provides the overall limits/thresholds for derivatives business.

### Macro Level

By Treasury and FX Group and Risk Management Group, responsible for policy formulation, procedure development and implementation, monitoring and reporting.

### Micro Level:

Treasury Derivatives and Structured Product Desk where risks are actually created and Treasury Operations for settlements of the transactions.

Derivative Risk Management caters the following risks:-

Market Risk arises from changes in market rates such as Interest Rates, Foreign Exchange Rates, Equity Prices, credit spreads and/or commodity prices as well as their correlations and volatilities resulting in a loss to earnings and capital. In line with SBP's regulatory guidelines, Bank hedges back-to-back all option transactions with other financial institutions. Bank minimizes the exchange rate risk on its Cross Currency Swap Portfolio by hedging the exposure in interbank market. Bank also manages interest rate risk on its Interest Rate Derivatives and Cross Currency Swaps through various sensitivity limits approved by ALCO. Marked to market positions and sensitivity of the derivatives transactions are monitored on regular basis. All individual deals are approved at the appropriate level of authority after analyzing the risk and benefits associated with the deals.

Credit risk is a probable risk of loss resulting from customer's inability to meet contractual obligation that may have adverse impact on Bank's profitability. Bank manages the risk by setting policies and limits for counterparty based on a pre-defined criteria linked with financial health of the customer. The exposure of each counterparty is monitored by Risk Management Function of the Bank on daily basis.

Considering small Derivative portfolio, bank is not exposed to any liquidity risk. However; Bank manages its liquidity risk through Bank's liquidity risk framework which is defined in relevant Liquidity Risk Section.

# Notes To The Unconsolidated Financial Statements

For the year ended December 31, 2020

Bank has adequate system and controls for smooth execution of derivative transactions. Transactions are executed in line with well defined accounting and operational aspects to mitigate the operational risk. Policies and control functions are regularly reviewed on periodic basis. The Bank uses a third party's Super Derivative System which provides front end sales and structuring capabilities, end to end valuation solutions, risk management systems, back end processing and provides analytical tools to measure various risk exposures and carry out sensitivity analysis.

The Bank uses a third party's Super Derivative System which provides front end sales and structuring capabilities, end to end valuation solutions, risk management systems, back end processing and provides analytical tools to measure various risk exposures and carry out sensitivity analysis.

The goal of asset/liability management (ALM) is to properly manage the risk related to changes in interest rates, the mix of balance sheet assets and liabilities, the holding of foreign currencies, and the use of derivatives. Due to thin liquidity in the derivative market, interest rate derivatives are not actively used to manage/alter the interest rate risk profile of the bank."

## 46 EVENTS AFTER THE REPORTING DATE

**46.1** The Board of Directors in its meeting held on February 10, 2021 has announced a final cash dividend in respect of the year ended December 31, 2020 of Rs.15.00 per share (2019: Rs. 5.00 per share). These unconsolidated financial statements for the year ended December 31, 2020 do not include the effect of these appropriations which will be accounted for subsequent to the year end.

## 47 GENERAL

Figures have been rounded off to the nearest thousand of rupees unless otherwise stated.

## 48 DATE OF AUTHORIZATION FOR ISSUE

These unconsolidated financial statements were authorized for issue by the Board of Directors of the Bank in their meeting held on February 10, 2021.



**Imran Maqbool**  
President/Chief Executive



**Hammad Khalid**  
Chief Financial Officer



**S.M. Muneer**  
Director



**Mian Umer Mansha**  
Director

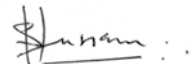

**Shahzad Hussain**  
Director



## Annexure I

## Statement showing written-off loans or any other financial relief of five hundred thousand or above provided during the year 2020

| Sr. No.         | Name and address of the borrower                                                                     | Name of individuals/ partners/ directors                           |                                                                          | Father's /Husband's name                                  | Outstanding liabilities at beginning of year |                    |        |        | Principal Written off | Interest/ Markup Written off/ waived | Other Fin. Reliefs Provided | Total  |
|-----------------|------------------------------------------------------------------------------------------------------|--------------------------------------------------------------------|--------------------------------------------------------------------------|-----------------------------------------------------------|----------------------------------------------|--------------------|--------|--------|-----------------------|--------------------------------------|-----------------------------|--------|
|                 |                                                                                                      | Name                                                               | NIC No.                                                                  |                                                           | Principal                                    | Interest / mark up | Others | Total  |                       |                                      |                             |        |
| <b>Domestic</b> |                                                                                                      |                                                                    |                                                                          |                                                           |                                              |                    |        |        |                       |                                      |                             |        |
| 1               | <b>Saddique Raffique &amp; Sons</b><br>74-B Ghallah Mandi Vehari                                     | Abdul Sattar                                                       | 36603-2585282-7                                                          | Muhammad Saddique                                         | -                                            | 467                | 56     | 523    | -                     | 467                                  | 56                          | 523    |
| 2               | <b>Shell Burewala Express</b><br>Shop # 13-14, Gulshan E Rehman Multan Road Burewala.                | Abdul Rasheed                                                      | 36601-1589087-1                                                          | Abdul Hameed                                              | -                                            | 1,175              | 46     | 1,221  | -                     | 1,175                                | 46                          | 1,221  |
| 3               | <b>Amir &amp; Co</b><br>Islamia Colony Road, Noor e Wali Street, Rahim Yar Khan.                     | Muhammad Nadeem Aslam                                              | 31303-4864137-1                                                          | Haji Muhammad Aslam                                       | -                                            | 888                | 50     | 938    | -                     | 888                                  | 50                          | 938    |
| 4               | <b>Azeem Exports (Pvt) Ltd.</b><br>202/RB Tanki Stop Ghona Road Faisalabad.                          | Mr. Ibrar Ahmed<br>Mrs. Yasmeen Ibrar<br>Mr. Naeem Akhtar          | 33100-0310806-9<br>33100-0336460-2<br>33100-6007043-8                    | Mushtaq Ahmed Ibrar Ahmed Ijaz Ahmed                      | -                                            | 29,234             | 80     | 29,314 | -                     | 29,234                               | 80                          | 29,314 |
| 5               | <b>Mushtaq Ahmed Khan</b><br>Chandni Chowk, Nawwan Jandawala, District Bhakkar                       | Mushtaq Ahmed Khan                                                 | 38103-2239766-3                                                          | Ghulam Qadir                                              | -                                            | 531                | 44     | 575    | -                     | 531                                  | 44                          | 575    |
| 6               | <b>Shahid Iqbal &amp; Haji Ghulam Rasool</b><br>1. 668-A S/Town Sargodha<br>2. 662-A S/Town Sargodha | Shahid Iqbal<br>Haji Ghulam Rasool                                 | 38403-6114219-7                                                          | Ch. Muhammad Iqbal<br>Haji Makhdoom<br>Muhammad Hussain   | -                                            | 665                | 32     | 697    | -                     | 665                                  | 32                          | 697    |
| 7               | <b>SNS Textiles (Pvt) Ltd</b><br>Head Office at 17-D-II, Green Town, Factory Area, Lahore            | Muhammad Nadeem<br>Shahid Maqsood<br>Rizwana Nadeem<br>Sara Shahid | 35202-9903037-1<br>35202-3442308-5<br>35202-6481919-2<br>35202-6509332-8 | Inayat Ullah<br>M. Maqsood<br>M. Nadeem<br>Shahid Maqsood | -                                            | 29,619             | 3,371  | 32,990 | -                     | 29,619                               | 3,371                       | 32,990 |
| 8               | <b>Muhammad Zuflqar Arshad</b><br>House no. 163 Block-M, DHA, Lahore                                 | Muhammad Zuflqar Arshad                                            | 35201-9336715-9                                                          | Arsahd Ali Rashid                                         | -                                            | 4,203              | -      | 4,203  | -                     | 4,203                                | -                           | 4,203  |
| 9               | <b>Amir Iftikhar</b><br>House no. 364 Block-W, Phase-III, Defence Housing Authority, Lahore          | Amir Iftikhar                                                      | 35201-50666143-9                                                         | Sh. Iftikhar ud Din                                       | -                                            | 3,742              | 19     | 3,761  | -                     | 3,742                                | 19                          | 3,761  |
| 10              | <b>Guizar Begum</b><br>House no. bearing no. 78 Block C-2, PGEC Housing Society, Sattukatta, Lahore  | Guizar Begum                                                       | 35202-1791054-6                                                          | Malik Muhammad Akram                                      | -                                            | 971                | -      | 971    | -                     | 971                                  | -                           | 971    |
| 11              | <b>Muhammad Asif &amp; Muhammad Yaseen</b><br>House No 279 Muhallah / Block 13-B-1 Township Lahore   | Muhammad Asif<br>Muhammad Yaseen                                   | 35202-4417428-9<br>35202-0937710-9                                       | Muhammad Yaseen<br>Bashir Ahmed                           | -                                            | 1,570              | 75     | 1,645  | -                     | 1,570                                | 75                          | 1,645  |

## Statement showing written-off loans or any other financial relief of five hundred thousand or above provided during the year 2020

| Sr. No.         | Name and address of the borrower                                                                      | Name of individuals/ partners/ directors                                          |                                                                          | Father's /Husband's name                                  | Outstanding liabilities at beginning of year |                    |        | Principal Written off | Interest/ Markup Written off/ waived | Other Fin. Reliefs Provided | Total |
|-----------------|-------------------------------------------------------------------------------------------------------|-----------------------------------------------------------------------------------|--------------------------------------------------------------------------|-----------------------------------------------------------|----------------------------------------------|--------------------|--------|-----------------------|--------------------------------------|-----------------------------|-------|
|                 |                                                                                                       | Name                                                                              | NIC No.                                                                  |                                                           | Principal                                    | Interest / mark up | Others |                       |                                      |                             |       |
| <b>Domestic</b> |                                                                                                       |                                                                                   |                                                                          |                                                           |                                              |                    |        |                       |                                      |                             |       |
| 12              | <b>Ch. Aziz Ur Rehman &amp; Mst. Rubina Aziz</b><br>237 - D/II, Johar Town, Lahore                    | Ch. Aziz Ur Rehman<br>Mst. Rubina Aziz                                            | 35202-5462193-7<br>35202-1754926-2                                       | Ch. Abdul Rehman<br>Ch. Aziz Ur Rehman                    | -                                            | 4,149              | -      | 4,149                 | -                                    | -                           | 4,149 |
| 13              | <b>Abdul Jawad Shami</b><br>House No.2, Block H, Gulshan Ravi, Lahore                                 | Abdul Jawad Shami                                                                 | 35202-6499439-7                                                          | Abdul Sateem Shami                                        | -                                            | 2,164              | -      | 2,164                 | -                                    | -                           | 2,164 |
| 14              | <b>Mazhar Hussain and Nasira Mazhar</b><br>House No 5, Shershah Block, Garden Town, Lahore            | Mazhar Hussain<br>Nasira Mazhar                                                   | 35202-2997013-3 35202-2692430-0                                          | Sheikh Muhammad Hussain Mazhar Hussain                    | -                                            | 1,173              | 50     | 1,223                 | -                                    | 50                          | 1,223 |
| 15              | <b>Waseem Ahmad</b><br>House # 7, Street # 8, Mohallah Qureshi, Mazang, Lahore                        | Waseem Ahmad                                                                      | 35202-8395241-9                                                          | Mushtaq Ahmad                                             | -                                            | 1,016              | -      | 1,016                 | -                                    | -                           | 1,016 |
| 16              | <b>Madina Rice Mill</b><br>G.T Road, Gakhar Mandi, Tehsil Wazirabad, District Gujranwala              | Muhammad Aslam                                                                    | 34104-4289360-9                                                          | Muhammad Sagheer                                          | -                                            | 5,450              | -      | 5,450                 | -                                    | -                           | 5,450 |
| 17              | <b>Muhammad Shakir</b><br>House No. 140/2, Sector 5-F, New Karachi, Karachi                           | Muhammad Shakir                                                                   | 42101-4630068-7                                                          | Liaquat Shaikh Qureshi                                    | -                                            | 815                | 35     | 850                   | -                                    | 35                          | 850   |
| 18              | <b>Muhammad Tanvir Mirza Rehmani</b><br>House No. 140, 1st Floor, Block 18, Gulshan -E Iqbal, Karachi | Muhammad Tanvir Mirza Rehmani                                                     | 42201-2527934-5                                                          | Muhammad Iftikhar Mirza Rehmani                           | -                                            | 855                | -      | 855                   | -                                    | -                           | 855   |
| 19              | <b>Muhammad Naeem Umar</b><br>House No. 2-A,4/27, Nazimabad # 02, Karachi.                            | Muhammad Naeem Umar                                                               | 42101-2173377-3                                                          | Muhammad Umar                                             | -                                            | 1,843              | -      | 1,843                 | -                                    | -                           | 1,843 |
| 20              | <b>Abdul Waheed</b><br>Flat No. 308, 3rd Floor, Block-A, Mariam Palace, Khairabad Karachi.            | Abdul Waheed                                                                      | 42301-6963441-5                                                          | Muhammad Siddique                                         | -                                            | 600                | -      | 600                   | -                                    | -                           | 600   |
| 21              | <b>Suroor Maira Apparel (Pvt) Ltd.</b><br>House # 33/2, Street 29, Phase V, DHA, Karachi              | Zahir Rahimtoola<br>Assad Ullah Khan<br>Sherezaad Rahimtoola                      | 42000-0477988-9<br>42301-8897950-1<br>42301-0936325-2                    | Mehmood Rahimtoola<br>Mansoor Hussain<br>Zahir Rahimtoola | -                                            | 2,419              | -      | 2,419                 | -                                    | -                           | 2,419 |
| 22              | <b>Lable Garments &amp; Access. (Pvt) Ltd.</b><br>House # 33/2, Street 29, Phase V, DHA, Karachi      | Zahir Rahimtoola<br>Assad Ullah Khan<br>Sherezaad Rahimtoola<br>Daulat Rahimtoola | 42000-0477988-9<br>42301-8897950-1<br>42301-0936325-2<br>42000-2438892-4 | Mehmood Rahimtoola<br>Mansoor Hussain<br>Zahir Rahimtoola | -                                            | 734                | -      | 734                   | -                                    | -                           | 734   |
| 23              | <b>Qureshi Netwear Industries</b><br>788 Murad Pure New Marala Road Sialkot                           | Muhammad Jamil Ahmed Qureshi                                                      | 37403-0669367-1                                                          | Muhammad Ramzan                                           | -                                            | 3,544              | 17     | 3,561                 | -                                    | 17                          | 3,561 |

## Annexure I

## Statement showing written-off loans or any other financial relief of five hundred thousand or above provided during the year 2020

| Sr. No.         | Name and address of the borrower                                                                                                                          | Name of individuals/ partners/ directors                                                                 |                                                                                             | Father's /Husband's name                                                                                | Outstanding liabilities at beginning of year |                    |        | Principal Written off | Interest/ Markup Written off/ waived | Other Fin. Reliefs Provided | Total  |
|-----------------|-----------------------------------------------------------------------------------------------------------------------------------------------------------|----------------------------------------------------------------------------------------------------------|---------------------------------------------------------------------------------------------|---------------------------------------------------------------------------------------------------------|----------------------------------------------|--------------------|--------|-----------------------|--------------------------------------|-----------------------------|--------|
|                 |                                                                                                                                                           | Name                                                                                                     | NIC No.                                                                                     |                                                                                                         | Principal                                    | Interest / mark up | Others |                       |                                      |                             |        |
| <b>Domestic</b> |                                                                                                                                                           |                                                                                                          |                                                                                             |                                                                                                         |                                              |                    |        |                       |                                      |                             |        |
| 24              | <b>To To Sweet &amp; Food Corporation</b><br>Moriatalah Farooq Nagar, Kachi abadi, Near girls Primary School, Sheikhpura.                                 | Shahid Parvaiz                                                                                           | 35404-4242532-9                                                                             | Asghar Ali                                                                                              | -                                            | 1,069              | -      | 1,069                 | -                                    | -                           | 1,069  |
| 25              | <b>Rai Shadat And Co</b><br>Ghalla Mandi, Jalaipur Bhattian                                                                                               | Rai Shadat Khan                                                                                          | 34302-1215157-3                                                                             | Rai Sultan Mehmood                                                                                      | -                                            | 1,003              | -      | 1,003                 | -                                    | -                           | 1,003  |
| 26              | <b>Zohaib Rice Mills</b><br>Ikhtas pur Road, Shakar Garh, Narowal                                                                                         | Malik Niaz Ahmad                                                                                         | 34502-6305208-3                                                                             | Islam Din                                                                                               | -                                            | 1,685              | -      | 1,685                 | -                                    | -                           | 1,685  |
| 27              | <b>Hassan Rice Mills</b><br>Gujranwala Road Kot Rehbar Dist Gujranwala Tehsil Wazirabad                                                                   | Hassan Asghar                                                                                            | 34101-2676637-5                                                                             | Muhammad Asghar                                                                                         | -                                            | 599                | -      | 599                   | -                                    | -                           | 599    |
| 28              | <b>Mumtaz Traders</b><br>Shopping Center Nangi Mirpur                                                                                                     | Muhammad Mumtaz Ch.                                                                                      | 81302-1707251-7                                                                             | Muhammad Zaman                                                                                          | -                                            | 1,063              | -      | 1,063                 | -                                    | -                           | 1,063  |
| 29              | <b>Mughal Traders</b><br>House No.03, Saitana Banglow, Jaranwala Road, Faisalabad                                                                         | Muhammad Rafi Ul Zaman                                                                                   | 33104-2126873-5                                                                             | Abdul Ghafoor                                                                                           | -                                            | 453                | 52     | 505                   | 453                                  | 52                          | 505    |
| 30              | <b>Muhammad Awais</b><br>Sadiq Plaza 3rd floor Room No.12, near Akkas Photo Studio Katchery Bazar Faisalabad                                              | Muhammad Awais                                                                                           | 33100-8174477-3                                                                             | Muhammad Younas                                                                                         | -                                            | 8,960              | 102    | 9,062                 | 8,960                                | 102                         | 9,062  |
| 31              | <b>J.W Gases</b><br>B-89 Commercial Centre Gullistan Colony, Faisalabad.                                                                                  | Muhammad Waseem                                                                                          | 33100-4224474-0                                                                             | Malik Wazir Ali                                                                                         | -                                            | 1,605              | 53     | 1,658                 | 1,605                                | 53                          | 1,658  |
| 32              | <b>Ahmed Brothers</b><br>Shoo No. 01, Trust Plaza, Fatima, Jinnah Road, Sargodha                                                                          | Khalid Khurshed Piracha                                                                                  | 38403-3107227-9                                                                             | Khurshed Ahmed Piracha                                                                                  | -                                            | 945                | 83     | 1,028                 | 945                                  | 83                          | 1,028  |
| 33              | <b>Umer Hayat</b><br>Village & PO Rasool Pur Tarar, District Hafizabad.                                                                                   | Umer Hayat                                                                                               | 34302-9618143-5                                                                             | Imtiaz Ahmed                                                                                            | -                                            | 1,996              | 77     | 2,073                 | 1,996                                | 77                          | 2,073  |
| 34              | <b>Zaib Traders Rice Dealer</b><br>Railway Road Baddo Malhi, Tehsil & District Narowal.                                                                   | Muhammad Aslam                                                                                           | 34501-4606789-1                                                                             | Akbar Ali                                                                                               | -                                            | 1,958              | 61     | 2,019                 | 1,958                                | 61                          | 2,019  |
| 35              | <b>Millenium Securities &amp; Investments (Pvt) Ltd.</b><br>Office No. 01, 92-East, 3rd Floor, Razia Sharif Plaza, Fazi-ul-Haq Road, Blue Area, Islamabad | Ahsan Imtiaz Bhatti<br>Azhar Imtiaz Bhatti<br>Athar Imtiaz Bhatti<br>Tahira Imtiaz Bhatti<br>Ayesa Ehsan | 61101-0105948-7<br>61101-8043568-9<br>61101-1964243-1<br>61101-1186037-2<br>35202-2557738-6 | Imtiaz Ahmed Bhatti<br>Imtiaz Ahmed Bhatti<br>Imtiaz Ahmed Bhatti<br>Imtiaz Ahmed Bhatti<br>Ahsan Anwar | 47,260                                       | 74,713             | 3      | 121,976               | 74,093                               | -                           | 74,093 |

## Statement showing written-off loans or any other financial relief of five hundred thousand or above provided during the year 2020

| Sr. No.         | Name and address of the borrower                                                                                          | Name of individuals/ partners/ directors                                                                                                                         |                                                                                                                                                     | Father's /Husband's name                                                                                                                                                                    | Outstanding liabilities at beginning of year |                    |        |       | Principal Written off | Interest/ Markup Written off/ waived | Other Fin. Reliefs Provided | Total |
|-----------------|---------------------------------------------------------------------------------------------------------------------------|------------------------------------------------------------------------------------------------------------------------------------------------------------------|-----------------------------------------------------------------------------------------------------------------------------------------------------|---------------------------------------------------------------------------------------------------------------------------------------------------------------------------------------------|----------------------------------------------|--------------------|--------|-------|-----------------------|--------------------------------------|-----------------------------|-------|
|                 |                                                                                                                           | Name                                                                                                                                                             | NIC No.                                                                                                                                             |                                                                                                                                                                                             | Principal                                    | Interest / mark up | Others | Total |                       |                                      |                             |       |
| <b>Domestic</b> |                                                                                                                           |                                                                                                                                                                  |                                                                                                                                                     |                                                                                                                                                                                             |                                              |                    |        |       |                       |                                      |                             |       |
| 36              | <b>D.G Flour Mills</b><br>Mouza Jhoke Yar Shah<br>Tauansa Road D.G Khan.                                                  | Muhammad Zaifur Ullah<br>Khan Ghalzai<br>Khan Dur Muhammad<br>Khan Ghalzai                                                                                       | 32102-1795936-9<br>36302-0324205-3                                                                                                                  | Muhammad Aslam Khan<br>Ghalzai<br>Khan Noor Muhammad<br>Khan                                                                                                                                | -                                            | 2,532              | 66     | -     | 2,532                 | 66                                   | 2,598                       |       |
| 37              | <b>Khawaja Brothers Brokers</b><br>House No.549 Block G<br>Shah Rukne Alam Colony<br>Multan.                              | Shahid Latif (Deceased)<br>Mst. Rukhsana Zaka<br>(Deceased)<br>Mst.Kiran Shahid<br>Arskan Shahid<br>Mst. Sadaf Shahid<br>Mst. Kanwal Shahid<br>Waqas Shahid      | 36302-1757105-1<br>36302-9437571-2<br>36302-0590964-6<br>36302-2059711-9<br>36302-9533426-2<br>36302-9522976-2<br>36302-5108178-7                   | Khawaja Abdul Latif<br>W/o Khawaja Shahid Latif<br>D/o Khawaja Shahid Latif<br>S/o Khawaja Shahid Latif<br>D/o Khawaja Shahid Latif<br>D/o Khawaja Shahid Latif<br>S/o Khawaja Shahid Latif | -                                            | 2,742              | 17     | -     | 2,742                 | 17                                   | 2,759                       |       |
| 38              | <b>Changwani Cotton Ginners</b><br>Jampur Road Basti Mari<br>.Mauza Paiga Tehsil &<br>District D.G Khan.                  | Malik Raashid Ahmad<br>Maqbool Ahmad<br>Zaifur Iqbal<br>Mst. Parveen Bibi<br>Saeed Ahmad<br>Malik Allah Baksh<br>Malik Bashir Ahmad<br>Ghulam Fared              | 32102-5968652-5<br>32102-0934213-3<br>32102-0934215-5<br>32102-0899191-2<br>30962-396138-0<br>30999-2834110-0<br>32102-7360864-7<br>32102-3933414-1 | Qadir Baksh<br>Malik Baksh<br>Maqbool Ahmad<br>W/o Zaifur Iqbal<br>Haji Sher Muhammad<br>Haji Sher Muhammad<br>Haji Sher Muhammad<br>Haji Sher Muhammad                                     | -                                            | 621                | 100    | -     | 621                   | 100                                  | 721                         |       |
| 39              | <b>Gold Star Oil Mills</b><br>Sher Shah Road Bye Pass<br>Multan.                                                          | Khawaja Muhammad<br>Ehsan Ul Haq<br>Khawaja Muhammad<br>Imdad Ul Haq<br>Khawaja Muhammad<br>Ikram Ul Haq<br>Khawaja Muhammad<br>Inam Ul Haq<br>Mst. Musarat Bibi | 36302-2475654-5<br>36302-7301653-3<br>36302-0364961-7<br>36302-6265395-5<br>36302-0330915-4                                                         | Khawaja Muhammad<br>Atzal Haq<br>Khawaja Muhammad<br>Atzal Haq<br>Khawaja Muhammad<br>Atzal Haq<br>Khawaja Muhammad<br>Atzal Haq<br>Atzal Haq                                               | -                                            | 18,840             | 16     | -     | 18,840                | 16                                   | 18,856                      |       |
| 40              | <b>Mian Brothers</b><br>Jalla Mor, Tehsil Duniyapur,<br>District Lodhran                                                  | Mian Hamid Raza Shakir                                                                                                                                           | 36201-1503143-1                                                                                                                                     | Mian Allah Ditta                                                                                                                                                                            | 118                                          | 441                | 75     | -     | 440                   | 75                                   | 515                         |       |
| 41              | <b>Ghulam Mohyuddin &amp; Sons</b><br>65 G.T. Road, Hide<br>Market, Lahore                                                | Sheikh Ghulam<br>Mohyuddin Sethi<br>Sheikh Moeen Mohyuddin<br>Sethi                                                                                              | 35202-3577613-1<br>35202-6249148-5                                                                                                                  | Muhammad Lateef Sethi<br>Sheikh Ghulam<br>Mohyuddin Sethi                                                                                                                                   | -                                            | 2,931              | -      | -     | 2,931                 | -                                    | 2,931                       |       |
| 42              | <b>Sohail Sarfraz Etc</b><br>House # 26-L, Gulberg-II,<br>Lahore                                                          | Sohail Sarfraz<br>Sunil Sarfraz<br>Naghmana Sarfraz                                                                                                              | 35202-2518098-3<br>35202-2400089-4<br>35202-2518088-7                                                                                               | Sarfraz Ahmed                                                                                                                                                                               | -                                            | 1,950              | 17     | -     | 1,950                 | 17                                   | 1,967                       |       |
| 43              | <b>Saqib Jamshaid Dar &amp; Sarwar Saeeda</b><br>House No. 5, Race<br>Course Road,<br>Near Post Office<br>Shadman Lahore. | Saqib Jamshaid Dar<br>Sarwar Saeeda                                                                                                                              | 35202-1774555-3<br>35202-1604635-4                                                                                                                  | Muhammad Jamshed Dar                                                                                                                                                                        | -                                            | 2,336              | 75     | -     | 2,411                 | -                                    | 2,411                       |       |

## Annexure I

## Statement showing written-off loans or any other financial relief of five hundred thousand or above provided during the year 2020

| Sr. No.         | Name and address of the borrower                                                                                      | Name of individuals/ partners/ directors              |                                                        | Father's /Husband's name                             | Outstanding liabilities at beginning of year |                    |        | Principal Written off | Interest/ Markup Written off/ waived | Other Fin. Reliefs Provided | Total |
|-----------------|-----------------------------------------------------------------------------------------------------------------------|-------------------------------------------------------|--------------------------------------------------------|------------------------------------------------------|----------------------------------------------|--------------------|--------|-----------------------|--------------------------------------|-----------------------------|-------|
|                 |                                                                                                                       | Name                                                  | NIC No.                                                |                                                      | Principal                                    | Interest / mark up | Others |                       |                                      |                             |       |
| <b>Domestic</b> |                                                                                                                       |                                                       |                                                        |                                                      |                                              |                    |        |                       |                                      |                             |       |
| 44              | <b>Ali Adnan Munir &amp; Munir Ahmad</b><br>House No.817 Block-A<br>Sabzar Colony, Multan<br>Road, Lahore             | Ali Adnan Munir<br>Munir Ahmad Ch*                    | 35202-2496025-1<br>35202-2776894-9                     | Munir Ahmed Ch<br>Ch. Muhammad Ibrahim               | -                                            | 876                | 70     | 946                   | -                                    | 70                          | 946   |
| 45              | <b>Muhammad Ashfaq</b><br>House No. P-511, St<br>No. 12, Mohallah Sarfraz<br>Colony, Raja Wala,<br>Faisalabad         | Muhammad Ashfaq                                       | 33100-7847086-5                                        | Abdul Sattar                                         | -                                            | 2,912              | 67     | 2,979                 | -                                    | 67                          | 2,979 |
| 46              | <b>IMTIAZ ALI RAJPER</b><br>House No. 12-C/9, KDA<br>Scheme No. 7, Chandni<br>Chowk, Main University<br>Road, Karachi | Imtiaz Ali Rajper                                     | 42201-4050361-5                                        | Shah Muhammad                                        | -                                            | 711                | -      | 711                   | -                                    | -                           | 711   |
| 47              | <b>Muhammad Hanif Liaquat</b><br>House# 29, Ibrahim Allah<br>Rakhan Building                                          | Muhammad Hanif Liaquat                                | -                                                      | -                                                    | 140                                          | 425                | -      | 565                   | 140                                  | -                           | 565   |
| 48              | <b>Ahmed Bilal Awan</b><br>H.No. 2/536 Street N<br>O.07 Gurunanak Pura<br>wala Lahore                                 | Ahmed Bilal Awan                                      | 35200-1452001-5                                        | Ghulam Rasul Awan                                    | 324                                          | 713                | -      | 1,037                 | 324                                  | -                           | 1,037 |
| 49              | <b>Khurram Rafi</b><br>House 5 Muslim Street,<br>Baghbanpura, Lahore                                                  | Khurram Rafi                                          | 35201-9921896-1                                        | Mian Muhammad Rafi                                   | 250                                          | 385                | -      | 635                   | 250                                  | -                           | 635   |
| 50              | <b>Aatif Mushtaq</b><br>House No.21, St No.4<br>Quaid-E-Azam Colony<br>Karachi                                        | Aatif Mushtaq                                         | 37405-2174893-5                                        | Mushtaq Ahmed Anjum                                  | 284                                          | 364                | -      | 648                   | 284                                  | -                           | 648   |
| 51              | <b>Sohail Shahabuddin Meghani</b><br>7 Star Lodges, Near<br>Agha Khan Jamaikhana,<br>Garden E St, Karachi*            | Sohail Shahabuddin<br>Meghani                         | 42201-6868522-3                                        | Shahabuddin Meghani                                  | 275                                          | 318                | -      | 593                   | 275                                  | -                           | 593   |
| 52              | <b>Changaz Ali Khan</b><br>Flat No. A 25 , Rofi App<br>13D.2, Gulshan E Iqbal,<br>Karachi                             | Changaz Ali Khan                                      | 41304-0248214-9                                        | Muhammad Ali Khan                                    | 244                                          | 281                | -      | 525                   | 244                                  | -                           | 525   |
| 53              | <b>Muhammad Atif Riaz</b><br>Scheme#2, Shalimar Link<br>House No 1 Ali Park,<br>Lahore.                               | "Muhammad Atif Raiz<br>Muhammad Raiz<br>Parveen Raiz" | 35202-3192609-7<br>35202-8211659-9 35202-<br>9858708-8 | Haji Muhammad Riaz<br>Noor Muhammad<br>Muhammad Raiz | -                                            | 793                | 17     | 810                   | -                                    | 17                          | 810   |
| 54              | <b>Badar Ali</b><br>House # 2, Street # 7,<br>Fleming Road, Lahore                                                    | Badar Ali                                             | 35202-9994444-1                                        | Muhammad Asif                                        | -                                            | 1,120              | 60     | 1,180                 | -                                    | 60                          | 1,180 |
| 55              | <b>Shakib Pasha</b><br>56 Sikandar Block, Allama<br>Iqbal Town, Lahore.                                               | Shakib Pasha                                          | 35202-3006115-1                                        | Zulfiqar Haider                                      | -                                            | 1,071              | 17     | 1,088                 | -                                    | 17                          | 1,088 |

## Statement showing written-off loans or any other financial relief of five hundred thousand or above provided during the year 2020

| Sr. No.         | Name and address of the borrower                                                                     | Name of individuals/ partners/ directors                             |                                                                          | Father's /Husband's name                                                          | Outstanding liabilities at beginning of year |                    |        | Principal Written off | Interest/ Markup Written off/ waived | Other Fin. Reliefs Provided | Total |         |
|-----------------|------------------------------------------------------------------------------------------------------|----------------------------------------------------------------------|--------------------------------------------------------------------------|-----------------------------------------------------------------------------------|----------------------------------------------|--------------------|--------|-----------------------|--------------------------------------|-----------------------------|-------|---------|
|                 |                                                                                                      | Name                                                                 | NIC No.                                                                  |                                                                                   | Principal                                    | Interest / mark up | Others |                       |                                      |                             |       | Total   |
| <b>Domestic</b> |                                                                                                      |                                                                      |                                                                          |                                                                                   |                                              |                    |        |                       |                                      |                             |       |         |
| 56              | <b>Muhammad Ilyas</b><br>Old Sabzi Mandi<br>Rehmania Road Street<br>No.1 Faisalabad                  | Muhammad Ilyas                                                       | 33100-2993303-3                                                          | Ghulam Muhammad                                                                   | -                                            | 479                | 39     | 518                   | -                                    | 479                         | 39    | 518     |
| 57              | <b>Abdul Sattar</b><br>House no. 5, Street 6,<br>Block 25, Sargodha                                  | Abdul Sattar                                                         | 38403-9161790-1                                                          | Ali Muhammad                                                                      | 110                                          | 815                | 94     | 1,019                 | -                                    | 815                         | 94    | 909     |
| 58              | <b>National Filling Point</b><br>Petrol Pump at Babar<br>Road, District Council<br>Sargodha          | Azhar Ul Haque Sheikh                                                | 38403-2070079-5                                                          | Fazal Haq                                                                         | -                                            | 685                | 69     | 754                   | -                                    | 685                         | 69    | 754     |
| 59              | <b>Zeenat Tea Company</b><br>Room No. 13, Suleman<br>Plaza, Ashraf Road,<br>Peshawar City"           | Shahzad Arif                                                         | 17301-5095424-1                                                          | Abdul Ghani                                                                       | 1,000                                        | 843                | -      | 1,843                 | -                                    | 749                         | -     | 749     |
| 60              | <b>Ghousia Traders</b><br>Adda Machiwal, Burewala<br>Road, Vehaiti."                                 | Rana Abdul Aziz Khan                                                 | 36603-1391142-1                                                          | Rana Taj Muhammad                                                                 | -                                            | 1,045              | 50     | 1,095                 | -                                    | 1,045                       | 50    | 1,095   |
| 61              | <b>Muhammad Aslam Khan</b><br>(Staff Finance), Flat<br>N.18/8-E, Sector I-8/I<br>Islamabad.          | Muhammad Aslam Khan                                                  | 61101-2205616-9                                                          | Muhammad Ameen Khan                                                               | -                                            | 704                | 16     | 720                   | -                                    | 704                         | 16    | 720     |
| 62              | <b>Ahmad Traders</b><br>Ward No.9 street Masjid<br>Embli Wali Jatol District<br>Muzaffargarh.        | Rao Shafiqat Ali                                                     | 32302-5901986-7                                                          | Liaquat Ali                                                                       | -                                            | 1,122              | 59     | 1,181                 | -                                    | 1,122                       | 59    | 1,181   |
| 63              | <b>Indus Ginners</b><br>Indus Cotton Factory<br>JamPur Road, Rajanpur                                | Amna Tabbasum                                                        | 32403-9050100-6                                                          | Sheikh Abdul Sattar                                                               | -                                            | 1,666              | 17     | 1,683                 | -                                    | 1,666                       | 17    | 1,683   |
| 64              | <b>Sajid Textile Industries Limited</b><br>Plot # 6 Sector 12-A<br>North karachi Ind Area<br>Karachi | Sajid Maqbool<br>Zahid Maqbool<br>Farrukh Maqbool<br>Khurram Maqbool | 42101-8642463-9<br>42101-3632846-3<br>42101-3546491-3<br>42101-1766790-5 | Maqbool Ahmed<br>Maqbool Ahmed<br>Maqbool Ahmed<br>Maqbool Ahmed                  | 80,599                                       | 121,140            | -      | 201,739               | 80,599                               | 121,140                     | -     | 201,739 |
| 65              | <b>Benzar Apparels</b><br>Plot 8/1-C, Street<br>5, Sector 12-C, North<br>Karachi Township Karachi    | Muhammad Iqbal Jarullah<br>Muhammad Irfan Jarullah<br>Ahtesham Ahmed | 42000-0562364-9<br>42000-0562342-3<br>42201-0754459-9                    | Sheikh Muhammad<br>Jarullah<br>Muhammad Iqbal Jarullah<br>Muhammad Iqbal Jarullah | -                                            | 42,323             | 350    | 42,673                | -                                    | 42,323                      | 350   | 42,673  |
| 66              | <b>Four Star Packages</b><br>Cl-38, Sector 6-B, North<br>Karachi Industrial Area,<br>Karachi         | Jamil Ahmed                                                          | 42101-1832165-9                                                          | Wall Mohammad                                                                     | -                                            | 1,520              | -      | 1,520                 | -                                    | 1,520                       | -     | 1,520   |
| 67              | <b>Alpha Tex</b><br>House No.C-39, Block-6,<br>Guishan-e-Iqbal<br>Karachi"                           | Tasneem Javed                                                        | 42201-9464461-2                                                          | Javed Akhtar                                                                      | -                                            | 12,869             | 143    | 13,012                | -                                    | 12,869                      | 143   | 13,012  |

## Annexure I

## Statement showing written-off loans or any other financial relief of five hundred thousand or above provided during the year 2020

| Sr. No.         | Name and address of the borrower                                                                                                 | Name of individuals/ partners/ directors                                                                      |                                                                                                                | Father's /Husband's name                                                                                    | Outstanding liabilities at beginning of year |                    |        |         | Principal Written off | Interest/ Markup Written off/ waived | Other Fin. Reliefs Provided | Total   |
|-----------------|----------------------------------------------------------------------------------------------------------------------------------|---------------------------------------------------------------------------------------------------------------|----------------------------------------------------------------------------------------------------------------|-------------------------------------------------------------------------------------------------------------|----------------------------------------------|--------------------|--------|---------|-----------------------|--------------------------------------|-----------------------------|---------|
|                 |                                                                                                                                  | Name                                                                                                          | NIC No.                                                                                                        |                                                                                                             | Principal                                    | Interest / mark up | Others | Total   |                       |                                      |                             |         |
| <b>Domestic</b> |                                                                                                                                  |                                                                                                               |                                                                                                                |                                                                                                             |                                              |                    |        |         |                       |                                      |                             |         |
| 68              | <b>Tharparkar Sugar Mills Limited</b><br>14-C, 5th Commercial Lane Zanzama Boulevard, Phase V, Defence Housing Authority Karachi | Imtiaz Ali Shah<br>Irfan Ali Shah<br>Irshad Ali Shah<br>Syed Shabanat Khan<br>Waheed Murad<br>Mohammad Saleem | 44103-2975179-7<br>44103-4745570-5<br>42501-5421949-9<br>42201-8154360-3<br>44103-3462014-1<br>44103-9761187-1 | Ghulam Haider Shah<br>Ghulam Haider Shah<br>Ghulam Haider Shah<br>Syed Wajahat Hussain<br>Mitho Khan<br>Jam | -                                            | 314,215            | 35     | 314,250 | -                     | 314,215                              | 35                          | 314,250 |
| 69              | <b>Asia Motor Company</b><br>G-32, Ruby Plaza, Preeedy Street, Karachi                                                           | Muhammad Saleem<br>Varind                                                                                     | 42101-5401777-7                                                                                                | Dawood Varind                                                                                               | -                                            | 7,135              | 130    | 7,265   | -                     | 7,135                                | 130                         | 7,265   |
| 70              | <b>CNC Electronics</b><br>Shop no. 2 SB, 5m, Kehkashan Complex, B1, 13-C Gulshan-e-iqbal Karachi                                 | Shahab Rahseed Khan                                                                                           | 42201-2852589-3                                                                                                | Abdul Rasheed Khan                                                                                          | -                                            | 7,135              | -      | 7,135   | -                     | 7,135                                | -                           | 7,135   |
| 71              | <b>Taha International Trading</b><br>Shop no. 2 SB, 5m, Kehkashan Complex, B1, 13-C Gulshan-e-iqbal Karachi                      | Shahab Rahseed Khan                                                                                           | 42201-2852589-3                                                                                                | Abdul Rasheed Khan                                                                                          | -                                            | 17,301             | -      | 17,301  | -                     | 17,301                               | -                           | 17,301  |
| 72              | <b>Indad Commission Shop</b><br>Kassisey Road, Ghallah Mandi Jalalpur Bhattian                                                   | Imdad Ullah                                                                                                   | 34302-1211858-3                                                                                                | Muhammad Hayat                                                                                              | 204                                          | 598                | 17     | 819     | -                     | 553                                  | 17                          | 570     |
| 73              | <b>Ch. Ammad Hassan Darogha</b><br>Mohalled Darogha wala, Khyali Shahpur, Gujranwala.                                            | Ch. Ammad Hassan<br>Darogha                                                                                   | 34101-6747667-1                                                                                                | Ch. Hassan Ali                                                                                              | -                                            | 715                | 25     | 740     | -                     | 715                                  | 25                          | 740     |
| 74              | <b>Allah-o-Akbar Petroleum</b><br>Chak No.420/GB Jhok, Burhan Tehsil Tandlianwala District Faisalabad.                           | Chaudhry Ghulam Nabi<br>Shahid<br>Faisal Rasheed                                                              | 33106-2013848-7<br>244-81-472816                                                                               | Ch. Muhammad Deen<br>Ahmed Din                                                                              | 2,941                                        | 1,521              | 68     | 4,530   | -                     | 1,542                                | 68                          | 1,610   |
| 75              | <b>Muhammad Saleem</b><br>House No. NW06 (NW 2 Old) Govt Degree College Road, Mohalla Raja Sultan, Asghar Mall Rawalpindi        | Muhammad Saleem                                                                                               | 37405-9435622-7                                                                                                | Ghulam Farooq                                                                                               | 8,141                                        | 3,776              | 15     | 11,932  | -                     | 3,841                                | 15                          | 3,856   |
| 76              | <b>Hakimullah &amp; Co.</b><br>Khungi, Tehsil Timgara, Dist Dir (Lower)                                                          | Attullah<br>Muhammad Ali Johar<br>(Late)                                                                      | 15302-8069659-5<br>15302-4054631-7                                                                             | Heji Karimullah<br>Hakimullah                                                                               | 419                                          | 2,663              | 994    | 4,076   | -                     | 2,664                                | 994                         | 3,658   |
| 77              | <b>Qamar Ul Islam</b><br>House No. 169, ST, Mohalla Saidpur Scheme-2, Rawalpindi                                                 | Qamar ul Islam                                                                                                | 37405-0502007-1                                                                                                | Jamil Ahmed                                                                                                 | -                                            | 5,192              | -      | 5,192   | -                     | 5,192                                | -                           | 5,192   |

## Statement showing written-off loans or any other financial relief of five hundred thousand or above provided during the year 2020

| Sr. No.         | Name and address of the borrower                                                                     | Name of individuals/ partners/ directors                                                      |                                                                          | Father's /Husband's name                                                     | Outstanding liabilities at beginning of year |                    |        | Principal Written off | Interest/ Markup Written off/ waived | Other Fin. Reliefs Provided | Total  |
|-----------------|------------------------------------------------------------------------------------------------------|-----------------------------------------------------------------------------------------------|--------------------------------------------------------------------------|------------------------------------------------------------------------------|----------------------------------------------|--------------------|--------|-----------------------|--------------------------------------|-----------------------------|--------|
|                 |                                                                                                      | Name                                                                                          | NIC No.                                                                  |                                                                              | Principal                                    | Interest / mark up | Others |                       |                                      |                             |        |
| <b>Domestic</b> |                                                                                                      |                                                                                               |                                                                          |                                                                              |                                              |                    |        |                       |                                      |                             |        |
| 78              | <b>Mian Mehmood Ahmad &amp; Sons</b><br>Shop # -159 New Ghallah Mandi Multan."                       | Mehmood Ahmad                                                                                 | 35102-0624116-7                                                          | Abdul Majeed                                                                 | 800                                          | 990                | 15     | 1,805                 | 993                                  | 15                          | 1,008  |
| 79              | <b>Muhammad Azam Muhammad Naeem</b><br>Shop No. 38-C Ghallah Mandi Haroonabad District Bahawalnagar. | Muhammad Azam Muhammad Naeem                                                                  | 31104-9134472-9                                                          | Muhammad Ismail                                                              | 1,944                                        | 514                | 60     | 2,518                 | 520                                  | 60                          | 580    |
| 80              | <b>Mazhar Hussain</b><br>Village Nenowali, Tehsil & Distt. Sialkot.                                  | Mazhar Hussain                                                                                | 34603-2287791-7                                                          | Muhammad Shafi                                                               | -                                            | 709                | 57     | 766                   | 709                                  | 57                          | 766    |
| 81              | <b>Zahid Rice Traders R/O Manzoorabad PO Khais,</b><br>Wazirabad, District Gujranwala "              | Zahid Iqbal Cheema                                                                            | 34104-2219080-9                                                          | Muhammad Malik Cheema                                                        | 290                                          | 1,380              | 119    | 1,789                 | 1,383                                | 119                         | 1,502  |
| 82              | <b>Al-Madinah Plastic Pvt. Ltd.</b><br>F-4 Main Maripur Road, Site Area Karachi"                     | Fida Hussain Nayani<br>Ghulam Abbass Nayani<br>Mushtaq Hussain Nayani<br>Zahid Hussain Nayani | 42301-1813517-1<br>42201-4107366-3<br>42201-9775392-1<br>42301-7297089-7 | Wazir Ali Nayani<br>Wazir Ali Nayani<br>Wazir Ali Nayani<br>Wazir Ali Nayani | -                                            | 16,749             | -      | 16,749                | 16,749                               | -                           | 16,749 |
| 83              | <b>Silver Textile Factory</b><br>Plot No.D-28, Sector 12-A, North Karachi Industrial Area, Karachi   | Syed Ahmed Ali<br>Syed Owais Ali<br>Syed Usman Ali<br>Syed Yaqoob Ali                         | 42101-3971892-7<br>42101-4627686-3<br>42101-7642737-7<br>42101-8095918-5 | Syed Raza Ali<br>Syed Raza Ali<br>Syed Raza Ali<br>Syed Raza Ali             | -                                            | 1,637              | -      | 1,637                 | 1,637                                | -                           | 1,637  |
| 84              | <b>Muhammad Zia ul Haq</b><br>House No. 589, Block F/2, M.A. Johar Town, Lahore                      | Muhammad Zia ul Haq                                                                           | 35202-2363794-3                                                          | Muhammad Ikram ul Haq Chaudhry                                               | 5,863                                        | 4,744              | 19     | 10,626                | 4,447                                | 19                          | 4,466  |
| 85              | <b>Yawar Hanif</b><br>House # I-A/C-I Block G, Gulberg III Lahore                                    | Yawar Hanif Mian<br>Riffat Munawar<br>Nuzhat Hanif                                            | 35202-7634724-1<br>35202-7544977-2<br>35202-7554572-2                    | Muhammad Hanif Mian<br>Mian Munwar Ghafoor<br>Muhammad Hanif Mian            | -                                            | 4,847              | 19     | 4,866                 | 4,847                                | 19                          | 4,866  |
| 86              | <b>Zohaib Traders</b><br>House no. 65-A, Dilkusha Colony, Kot Lakhpat, Lahore.                       | Muhammad Zohaib                                                                               | 35202-3037668-9                                                          | Dishad Ahmad                                                                 | -                                            | 1,292              | 117    | 1,409                 | 1,292                                | 117                         | 1,409  |
| 87              | <b>Khalid Ishaq Re-Rolling Mills</b><br>Lakhodair Road, Muhalla Iqbal Nagar, Shalamar Town, Lahore   | "Imran Hussain Irfan Hussain"                                                                 | 35202-2544005-9                                                          | Sh. Muhammad Ali Sh. Muhammad Ali                                            | -                                            | 543                | 35     | 578                   | 543                                  | 35                          | 578    |
| 88              | <b>Saeed Ahmad</b><br>F-215, 2nd floor, Block C, Sea World Clifton, Karachi                          | Saeed Ahmad                                                                                   | 42301-6875193-3                                                          | Muhammad Annayat Ullah                                                       | 334                                          | 897                | -      | 1,231                 | 899                                  | -                           | 899    |
| 89              | <b>Muhammad Nazim</b><br>House # 159B, Street 8-C, Feroz Colony Out Fall Road, Sanat Nagar, Lahore   | Muhammad Nazim                                                                                | 35202-0236163-3                                                          | Haji Muhammad Yaqoob                                                         | 538                                          | 1,180              | -      | 1,718                 | 1,155                                | -                           | 1,155  |



## Annexure I

## Statement showing written-off loans or any other financial relief of five hundred thousand or above provided during the year 2020

| Sr. No.         | Name and address of the borrower                                                                                        | Name of individuals/ partners/ directors |                 | Father's /Husband's name | Outstanding liabilities at beginning of year |                    |        | Principal Written off | Interest/ Markup Written off/ waived | Other Fin. Reliefs Provided | Total |
|-----------------|-------------------------------------------------------------------------------------------------------------------------|------------------------------------------|-----------------|--------------------------|----------------------------------------------|--------------------|--------|-----------------------|--------------------------------------|-----------------------------|-------|
|                 |                                                                                                                         | Name                                     | NIC No.         |                          | Principal                                    | Interest / mark up | Others |                       |                                      |                             |       |
| <b>Domestic</b> |                                                                                                                         |                                          |                 |                          |                                              |                    |        |                       |                                      |                             |       |
| 90              | <b>Al-Rehmat Enterprises</b><br>Jinnah Road, Back side, Islamia College, Gujranwala                                     | Mian Waheed Ud din                       | 34101-7252734-3 | Rehmat Ali               | 2,000                                        | 2,632              | -      | 4,632                 | 2,654                                | -                           | 2,654 |
| 91              | <b>Ali Sabir</b><br>36-A, Canal View Housing Society, Lahore                                                            | Ali Sabir                                | 35202-2497389-3 | Muhammad Rashid Khan     | -                                            | 2,824              | -      | 2,824                 | 2,824                                | -                           | 2,824 |
| 92              | <b>Nuzhat Ifikhar</b><br>06-Zikria Town, Bosan Road, Multan                                                             | Nuzhat Ifikhar                           | 37405-6871157-4 | Sardar Ifikhar Ahmad     | 262                                          | 927                | -      | 1,189                 | 928                                  | -                           | 928   |
| 93              | <b>Al Syed Enterprises</b><br>Pindi Bhattian Road Sadiwan Tarar Dist. Hafizabad                                         | Syed Sejjad Ali (Late)                   | 34302-8603269-3 | Syed Anwar Shah          | -                                            | 871                | 74     | 945                   | 871                                  | 74                          | 945   |
| 94              | <b>Ikram Ullah</b><br>Village Jagganwala, P.O Jharianwala, District Hafizabad.                                          | Ikram Ullah                              | 34301-1699065-7 | Muhammad Idrees          | 558                                          | 842                | 47     | 1,447                 | 808                                  | 47                          | 855   |
| 95              | <b>Shan Fabrics</b><br>House no. P-212 Street No.06 Mohalla Garden Colony Faisalabad.                                   | Muhammad Iqbal                           | 33100-6783237-9 | Sheikh Allah Ditta       | 1,529                                        | 1,613              | 95     | 3,237                 | 1,601                                | 95                          | 1,696 |
| 96              | <b>Muhammad Zafar Ullah</b><br>House No. P-140 Street No.10, Ahmedabad Faisalabad                                       | Muhammad Zafar Ullah                     | 33100-7318037-7 | Sher Muhammad            | 2,951                                        | 1,978              | 67     | 4,996                 | 1,974                                | 67                          | 2,041 |
| 97              | <b>Tariq Irfan Khan</b><br>House No. P-48, New Civil Lines Faisalabad.                                                  | Tariq Irfan Khan                         | 33100-7220740-7 | Muhammad Khan            | -                                            | 6,022              | 67     | 6,089                 | 6,022                                | 67                          | 6,089 |
| 98              | <b>Al Rehman Kinno</b><br>Grading Factory Chaak No. 06-B Tehsil Bhatwal, Distt Sargodha                                 | Mehar Muhammad Zaman                     | 38401-8528298-9 | Mehar Ghulam Hussain     | -                                            | 9,261              | 67     | 9,328                 | 9,261                                | 67                          | 9,328 |
| 99              | <b>Pak Rice Mills</b><br>Rana Tanveer Road, Nangle Kaswala, Muridkey.                                                   | Muhammad Arshad                          | 35401-6606289-1 | Muhammad Nazir           | -                                            | 711                | 17     | 728                   | 711                                  | 17                          | 728   |
| 100             | <b>Ch. Asif Mahmood</b><br>Ghalla Mandi Warburton, Nankana Sahib                                                        | Ch. Asif Mahmood                         | 35501-0106412-9 | Abdul Ghani              | -                                            | 538                | -      | 538                   | 538                                  | -                           | 538   |
| 101             | <b>M. Ahmad Garments &amp; Dildar Ahmed</b><br>Near Darbar Allah Hoo & MashaAllah Furniture Jhya Moosa, Shahdra, Lahore | Dildar Ahmad                             | 35202-9691226-3 | Gulzar Ahmad             | -                                            | 772                | 17     | 789                   | 772                                  | 17                          | 789   |
| 102             | <b>Good Life Shoes</b><br>347-GT Road, Near Moman Pura Lahore                                                           | Muhammad Akram Anjum                     | 35201-6313040-9 | Muhammad Ali             | -                                            | 564                | 102    | 666                   | 564                                  | 102                         | 666   |

## Statement showing written-off loans or any other financial relief of five hundred thousand or above provided during the year 2020

| Sr. No.         | Name and address of the borrower                                                                                   | Name of individuals/ partners/ directors                                                                      |                                                                                             | Father's /Husband's name                                                                           | Outstanding liabilities at beginning of year |                    |        |         | Principal Written off | Interest/ Markup Written off/ waived | Other Fin. Reliefs Provided | Total   |
|-----------------|--------------------------------------------------------------------------------------------------------------------|---------------------------------------------------------------------------------------------------------------|---------------------------------------------------------------------------------------------|----------------------------------------------------------------------------------------------------|----------------------------------------------|--------------------|--------|---------|-----------------------|--------------------------------------|-----------------------------|---------|
|                 |                                                                                                                    | Name                                                                                                          | NIC No.                                                                                     |                                                                                                    | Principal                                    | Interest / mark up | Others | Total   |                       |                                      |                             |         |
| <b>Domestic</b> |                                                                                                                    |                                                                                                               |                                                                                             |                                                                                                    |                                              |                    |        |         |                       |                                      |                             |         |
| 103             | <b>Kashif Construction Company</b><br>18-Infantry Road,<br>Mustafabad, Lahore.                                     | Manzoor Kashif                                                                                                | 35201-1651678-5                                                                             | Muhammad Hussain                                                                                   | -                                            | 1,205              | 17     | 1,222   | -                     | 1,205                                | 17                          | 1,222   |
| 104             | <b>Aslam Tractor House Rehman Pura G.T.</b><br>Road Muridke District Sheikhpura                                    | "Muhammad Aslam Mirza Akbar Ali"                                                                              | 35401-7733223-9<br>35401-7738223-9                                                          | Muhammad Hussain<br>Muhammad Hussain                                                               | -                                            | 822                | -      | 822     | -                     | 822                                  | -                           | 822     |
| 105             | <b>Saleem Ahmed Riaz</b><br>House No. 7, Block-C,<br>Model Town Society,<br>Lahore                                 | Saleem Ahmed Riaz                                                                                             | 35202-4482042-5                                                                             | H. M Ahmed Riaz                                                                                    | -                                            | 19,716             | 66     | 19,782  | -                     | 19,716                               | 66                          | 19,782  |
| 106             | <b>Sajid &amp; Co</b><br>G Block, Sabzazar<br>Scheme, Lahore.                                                      | Sajid Mahmood                                                                                                 | 35202-8752556-9                                                                             | Mahmood ahmad                                                                                      | -                                            | 898                | -      | 898     | -                     | 898                                  | -                           | 898     |
| 107             | <b>Sardar Zari Corporation</b><br>P/o Khas Thingi Colony,<br>Chak No. 76 W/B, Tehsil<br>& District Vehari.         | "Mahmood Nasir<br>Roshan Din"                                                                                 | "36603-8632447-5<br>36603-3724902-7"                                                        | "Sardar Muhammad<br>Chiragh Din"                                                                   | 200                                          | 610                | 17     | 827     | -                     | 561                                  | 17                          | 578     |
| 108             | <b>The Farmers Group</b><br>Shop # 12 Masjid Ghallah<br>Mandi Vehari.                                              | Husnain Ahmed                                                                                                 | 36603-5763044-7                                                                             | Ahmad Yar                                                                                          | -                                            | 1,195              | 41     | 1,236   | -                     | 1,195                                | 41                          | 1,236   |
| 109             | <b>Kiyani Business Channel</b><br>Shop # 13, Ghallah<br>Mandi Vehari Market.                                       | Muhammad Nadeem<br>Kiyani                                                                                     | 36603-1457627-3                                                                             | Raja Meer Aslam                                                                                    | -                                            | 607                | 42     | 649     | -                     | 607                                  | 42                          | 649     |
| 110             | <b>Al-Hafiz Flour Mills</b><br>Qadirpur Rawan Multan.                                                              | Imtiaz Ahmad                                                                                                  | 36302-2446316-5                                                                             | Hafiz Iftikhar Ahmad                                                                               | 2,019                                        | 13,048             | -      | 15,067  | -                     | 13,056                               | -                           | 13,056  |
| 111             | <b>First Capital Equities Ltd</b><br>4th Floor, Lakson Square,<br>Building No.1, Sarwar<br>Saheed Road, Karachi.   | Mian Ehsan Ul Haq<br>Ahsan Zia Azhar<br>Ahmed Batla<br>Abdul Samad Raja<br>Suhail Qurban<br>Malik Safeer Raza | 42301-7045034-9<br>61101-2024487-5<br>42101-1950069-7<br>42000-7573045-7<br>35202-3028538-3 | Mian Munawar<br>Mian Zia Ud Din<br>Sheikh Noor<br>Abdul Wahab<br>QurbanHussain<br>Nawazish Hussain | -                                            | 98,956             | -      | 98,956  | -                     | 98,956                               | -                           | 98,956  |
| 112             | <b>First Capital Equities Ltd</b><br>4th Floor, Lakson Square,<br>Building No.1, Sarwar<br>Saheed Road, Karachi. " | Mian Ehsan Ul Haq<br>Ahsan Zia Azhar<br>Ahmed Batla<br>Abdul Samad Raja<br>Suhail Qurban<br>Malik Safeer Raza | 42301-7045034-9<br>61101-2024487-5<br>42101-1950069-7<br>42000-7573045-7<br>35202-3028538-3 | Mian Munawar<br>Mian Zia Ud Din<br>Sheikh Noor<br>Abdul Wahab<br>QurbanHussain<br>Nawazish Hussain | -                                            | 121,092            | -      | 121,092 | -                     | 121,092                              | -                           | 121,092 |
| 113             | <b>Millat Zarai Services</b><br>Tehsil Ahmed Pur Sial<br>District Jhang                                            | Muhammad Aslam<br>Chaudhry Muhammad<br>Akbar                                                                  | 36302-9840417-7<br>33203-1382478-1                                                          | Hurmat Khan<br>Hurmat Khan                                                                         | 4,896                                        | 454                | 95     | 5,445   | -                     | 498                                  | 95                          | 593     |

## Statement showing written-off loans or any other financial relief of five hundred thousand or above provided during the year 2020

| Sr. No.         | Name and address of the borrower                                                                                                            | Name of individuals/ partners/ directors                              |                                                       | Father's /Husband's name                         | Outstanding liabilities at beginning of year |                    |        |        | Principal Written off | Interest/ Markup Written off/ waived | Other Fin. Reliefs Provided | Total  |
|-----------------|---------------------------------------------------------------------------------------------------------------------------------------------|-----------------------------------------------------------------------|-------------------------------------------------------|--------------------------------------------------|----------------------------------------------|--------------------|--------|--------|-----------------------|--------------------------------------|-----------------------------|--------|
|                 |                                                                                                                                             | Name                                                                  | NIC No.                                               |                                                  | Principal                                    | Interest / mark up | Others | Total  |                       |                                      |                             |        |
| <b>Domestic</b> |                                                                                                                                             |                                                                       |                                                       |                                                  |                                              |                    |        |        |                       |                                      |                             |        |
| 114             | <b>Medicon Pharmaceutical Industries (Pvt) Ltd.</b><br>Shakeela Bukhari<br>B-1/11, Industrial Estate<br>Hayatabad, Jammud Road<br>Peshawar. | Maqbool Khan<br>Shakeela Bukhari<br>Fajad Maqbool                     | 17301-2252149-9<br>17301-4904731-0<br>17301-9112974-7 | Lal Mir Khan<br>W/O Maqbool Khan<br>Maqbool Khan | -                                            | 11,236             | -      | 11,236 | -                     | 11,236                               | -                           | 11,236 |
| 115             | <b>Sheikho Corporation</b><br>Adda Ghulam Hussain<br>Tehsil & District Vehari.                                                              | Muhammad Iqbal                                                        | 36602-0983305-5                                       | Muhammad Tufail                                  | 299                                          | 1,144              | 51     | 1,494  | -                     | 1,148                                | 51                          | 1,199  |
| 116             | <b>Muhammad Saleem &amp; Co</b><br>Adda Jhal Sial Tehsil &<br>District Vehari                                                               | Muhammad Saleem                                                       | 36601-4343571-1                                       | Chaudhry Ranjha Khan                             | 350                                          | 669                | -      | 1,019  | -                     | 670                                  | -                           | 670    |
| 117             | <b>All Enterprises</b><br>Inside Ahmed Puri Gate<br>Bahawalpur.                                                                             | Muhammad Iqbal Akhtar                                                 | 31202-6889172-9                                       | Muhammad Saeed                                   | -                                            | 1,767              | 92     | 1,859  | -                     | 1,767                                | 92                          | 1,859  |
| 118             | <b>Ahmad Commission Shop</b><br>Shop # 01 Masjid Market<br>Ghalah Mandi Vehari.                                                             | Rao Abdul Jabbar Khan                                                 | 36603-6664830-9                                       | Rao Lilo Khan                                    | -                                            | 1,151              | 46     | 1,197  | -                     | 1,151                                | 46                          | 1,197  |
| 119             | <b>Malik Brothers</b><br>General Bus Stand<br>Bahawalnagar.                                                                                 | Malik Kashif Zaheer<br>Malik Muhammad Gasim<br>Zaheer<br>Rahat Zaheer | 31101-1655553-1<br>31101-1646859-7<br>31101-1580445-4 | Zaheer Ahmed<br>Zaheer Ahmed<br>Zaheer Ahmed     | -                                            | 1,294              | 50     | 1,344  | -                     | 1,294                                | 50                          | 1,344  |
| 120             | <b>Sana Ullah Chatha</b><br>Qadirabad Road, Madina<br>Chowk Ali Pur Chatha,<br>Tehsil Wazirabad District<br>Gujranwala.                     | Sana Ullah Chatha                                                     | 34104-3085440-7                                       | Ashiq Ali                                        | 749                                          | 2,323              | 17     | 3,089  | -                     | 1,770                                | 17                          | 1,787  |
| 121             | <b>Sagheer Hussain</b><br>17-A, ALAF Town, Behind<br>Khan Colony, near<br>Bypass, Sheikhpura.                                               | Muhammad Sagheer<br>Hussain Shah                                      | 35402-1956884-7                                       | Syed Nadir Hussain Shah                          | 150                                          | 520                | -      | 670    | -                     | 521                                  | -                           | 521    |
| 122             | <b>Arif Khalid &amp; Najma Arif</b><br>House No. 72, Survey No.<br>26, 11th Lane, Khayaban-<br>e-Badar, DHA, Phase-VI,<br>Karachi           | Arif Khalid<br>Najma Arif                                             | 42301-0994647-3<br>42301-0900980-4                    | Khalid Mehboob<br>W/o. Arif Khalid               | 2,160                                        | 7,344              | 33     | 9,537  | -                     | 7,354                                | 33                          | 7,387  |
| 123             | <b>Shafqat Ali</b><br>30-1 Block Gulshan-E-<br>Ravi, Lahore                                                                                 | Shafqat Ali                                                           | 35202-2998805-1                                       | Muhammad Din                                     | -                                            | 714                | 87     | 801    | -                     | 714                                  | 87                          | 801    |
| 124             | <b>Shaukat Khan</b><br>St# 7, Iffiq Colony, Lalpat<br>Road, Shandara, Lahore                                                                | Shaukat Khan                                                          | 13302-0398861-1                                       | Abdul Raheem Khan                                | -                                            | 481                | 21     | 502    | -                     | 481                                  | 21                          | 502    |
| 125             | <b>Pervaiz Akhtar Ch</b><br>Dipaipur Dist: Norowal                                                                                          | Pervaiz Akhtar Ch                                                     | -                                                     | -                                                | 216                                          | 375                | -      | 591    | 216                   | 375                                  | -                           | 591    |
| 126             | <b>Rehmat Ali</b>                                                                                                                           | Rehmat Ali                                                            | 402-85-084745                                         | -                                                | 359                                          | 494                | -      | 853    | 359                   | 494                                  | -                           | 853    |

## Statement showing written-off loans or any other financial relief of five hundred thousand or above provided during the year 2020

| Sr. No.         | Name and address of the borrower                                                             | Name of individuals/ partners/ directors |                                    | Father's /Husband's name                 | Outstanding liabilities at beginning of year |                    |        | Principal Written off | Interest/ Markup Written off/ waived | Other Fin. Reliefs Provided | Total |
|-----------------|----------------------------------------------------------------------------------------------|------------------------------------------|------------------------------------|------------------------------------------|----------------------------------------------|--------------------|--------|-----------------------|--------------------------------------|-----------------------------|-------|
|                 |                                                                                              | Name                                     | NIC No.                            |                                          | Principal                                    | Interest / mark up | Others |                       |                                      |                             |       |
| <b>Domestic</b> |                                                                                              |                                          |                                    |                                          |                                              |                    |        |                       |                                      |                             |       |
| 127             | <b>Habib Ullah</b><br>VII & Po Faisalabad The.<br>Takhath Bhai Distt. Mardan                 |                                          | -                                  | -                                        | 311                                          | 265                | -      | 311                   | 265                                  | -                           | 576   |
| 128             | <b>Ghulam Hussain</b>                                                                        | Ghulam Hussain                           | 41103-9298542-7                    | Mohammad Hussain                         | 249                                          | 311                | -      | 249                   | 311                                  | -                           | 560   |
| 129             | <b>Umed Ali</b>                                                                              | Umed Ali                                 | 446-87-063810                      | -                                        | 237                                          | 285                | -      | 237                   | 285                                  | -                           | 522   |
| 130             | <b>Muhammad Sachal Khapri</b>                                                                | Muhammad Sachal Khapri                   | 473-45-562892                      | Mubarik Ali                              | 286                                          | 264                | -      | 286                   | 264                                  | -                           | 550   |
| 131             | <b>Khadim Hussain</b>                                                                        | Khadim Hussain                           | 432-85-024995                      | -                                        | 346                                          | 280                | -      | 346                   | 280                                  | -                           | 626   |
| 132             | <b>Rab Nawaz</b><br>Rind Mohallah<br>Ghulamullah Distt: Thatta                               | Rab Nawaz                                | 41406-6205121-7                    | Haji Allah Obayo Rind                    | 236                                          | 510                | -      | 236                   | 510                                  | -                           | 746   |
| 133             | <b>Ahmed Ali Memon</b><br>Hno.35/3/B, Near Imam<br>Baigah Ladhori Mohallah<br>Larkana        | Ahmed Ali Memon                          | -                                  | Fateh Muhammad Memon                     | 417                                          | 171                | -      | 417                   | 171                                  | -                           | 588   |
| 134             | <b>Abdul Sattar</b><br>Ailiah Bukhish Arbab The.<br>Tando Allah Yar Distt:<br>Hyderabad      | Abdul Sattar                             | -                                  | Gul Muhammad                             | 384                                          | 321                | -      | 384                   | 321                                  | -                           | 705   |
| 135             | <b>Mujeeb-Ur-Rehman</b><br>Hno.158-A, Bhtal Town<br>Jamohoro Hyderabad                       | Mujeeb-Ur-Rehman                         | -                                  | Haji Khan                                | 343                                          | 326                | -      | 343                   | 326                                  | -                           | 669   |
| 136             | <b>Muhammad Afzal</b><br>Umer Bodla Taluka<br>Sakrand Distt:<br>Nawabshah                    | Muhammad Afzal                           | -                                  | Abdul Latif Unner                        | 315                                          | 241                | -      | 315                   | 241                                  | -                           | 556   |
| 137             | <b>Syed Iftikhar Shah</b>                                                                    | Syed Iftikhar Shah                       | 432-85-024684                      | Bahawal shah                             | 345                                          | 250                | -      | 345                   | 250                                  | -                           | 595   |
| 138             | <b>Syed Sabir Hussain</b>                                                                    | Syed Sabir Hussain                       | 432-90-240362                      | -                                        | 339                                          | 290                | -      | 339                   | 290                                  | -                           | 629   |
| 139             | <b>Syed Abdul Wahab Shah</b>                                                                 | Syed Abdul Wahab Shah                    | 488-90-154338                      | Syed Haji Khan                           | 306                                          | 198                | -      | 306                   | 198                                  | -                           | 504   |
| 140             | <b>Muhammad Khan Liskani</b>                                                                 | Muhammad Khan Liskani                    | 44203-1255564-1                    | Mataro Khan Liskani                      | 408                                          | 286                | -      | 408                   | 286                                  | -                           | 694   |
| 141             | <b>Mubarak Shah Rice Mills</b><br>Main Chiniot Road,<br>Bhowana*                             | Syed Muhammad Ali Raza<br>Saima Raza     | 33100-9856916-7<br>33100-0896288-0 | Syed Jawad Shah<br>W/O Muhammad Ali Raza | 489                                          | 1,424              | -      | -                     | 868                                  | -                           | 1,913 |
| 142             | <b>Muhammad Usman Sheikh</b><br>House No. P-343/3, Main<br>Road Al Masoom Town<br>Faisalabad | Muhammad Usman<br>Sheikh                 | 33100-4555973-7                    | Sheikh Neik Muhammad                     | -                                            | 3,510              | 68     | -                     | 3,510                                | 68                          | 3,578 |
| 143             | <b>Ch. Abdul Hakeem</b><br>Ghuliah Mandi, Gujrat                                             | Ch. Abdul Hakeem                         | 52365-4542133-5                    | Nazir Ahmad                              | 699                                          | 1,507              | 16     | -                     | 1,519                                | 16                          | 1,535 |

## Statement showing written-off loans or any other financial relief of five hundred thousand or above provided during the year 2020

| Sr. No.         | Name and address of the borrower                                                                                            | Name of individuals/ partners/ directors                                          |                                                                          | Father's /Husband's name                                                            | Outstanding liabilities at beginning of year |                    |        |       | Principal Written off | Interest/ Markup Written off/ waived | Other Fin. Reliefs Provided | Total |
|-----------------|-----------------------------------------------------------------------------------------------------------------------------|-----------------------------------------------------------------------------------|--------------------------------------------------------------------------|-------------------------------------------------------------------------------------|----------------------------------------------|--------------------|--------|-------|-----------------------|--------------------------------------|-----------------------------|-------|
|                 |                                                                                                                             | Name                                                                              | NIC No.                                                                  |                                                                                     | Principal                                    | Interest / mark up | Others | Total |                       |                                      |                             |       |
| <b>Domestic</b> |                                                                                                                             |                                                                                   |                                                                          |                                                                                     |                                              |                    |        |       |                       |                                      |                             |       |
| 144             | <b>Lahore Rice Mills</b><br>Nankana road, warburton, Thesil Nankana Sahib district, Sheikhpura.                             | Romana Ibrahim (Deceased)<br>Muhammad Ibrahim (Deceased) Abid Latif Zahida Mumtaz | 35402-5582769-4<br>35402-1831219-1<br>35501-0322362-3                    | Muhammad Ibrahim<br>Muhammad Ashiq<br>Sofi Ghulam Yasin<br>Mumtaz Ahmed             | -                                            | 654                | 19     | 673   | -                     | 654                                  | 19                          | 673   |
| 145             | <b>Zahid &amp; CO.</b><br>G.T Road Narowal Road, Muridkey.                                                                  | Zahid Javed                                                                       | 35201-3768775-5                                                          | Amyad Hussain                                                                       | -                                            | 851                | 18     | 869   | -                     | 851                                  | 18                          | 869   |
| 146             | <b>RN Garments</b><br>Habib Park Multan Chungi Lahore."                                                                     | Rana Nadeem Siddique<br>Muhammad Naeem<br>Siddique Zahida Parveen                 | 35202-2767725-9<br>35202-5476820-3<br>35202-9106400-2                    | Muhammad Siddique Khan<br>Muhammad Siddique Khan<br>H/O Rana Muhammad Siddique Khan | 498                                          | 3,922              | 19     | 4,439 | -                     | 3,924                                | 19                          | 3,943 |
| 147             | <b>N S Surgical</b><br>H # 236, Durrani Town, Sialkot                                                                       | Syed Amyad Ali Shah<br>Syed Tanveer Abbas<br>Muhammad Arshad<br>Muntazir Abbas    | 34603-5431551-5<br>34603-7573856-7<br>34603-5049096-6<br>34603-7212107-3 | Syed Karamat Ali Shah<br>Syed Karamat Ali Shah<br>Saif ud din<br>Karamat Ali        | -                                            | 5,463              | -      | 5,463 | -                     | 5,463                                | -                           | 5,463 |
| 148             | <b>Sheikh Zahir Masud.</b><br>House No. 309-B, Valley Road, Westridge -I, Opposite Valley Clinic, Peshawar Road, Rawalpindi | Sheikh Zahir Masud                                                                | 37405-0658251-7                                                          | Sheikh Nisar Ahmad                                                                  | 30                                           | 6,163              | -      | 6,193 | -                     | 4,939                                | -                           | 4,939 |
| 149             | <b>Zafar Iqbal</b><br>House No. G-18, Mohallia Gulnar Colony, Club Line Peshawar Road Rawalpindi                            | Zafar Iqbal                                                                       | 37405-3552776-5                                                          | Muhammad Iqbal                                                                      | -                                            | 617                | -      | 617   | -                     | 617                                  | -                           | 617   |
| 150             | <b>Nadeem Khalid</b><br>House No. NW-661-A, Saidpur Scheme No. 1, Rawalpindi                                                | Nadeem Khalid                                                                     | 37405-6647588-1                                                          | Sheikh Muhammad Khalid                                                              | -                                            | 3,151              | -      | 3,151 | -                     | 3,151                                | -                           | 3,151 |
| 151             | <b>Naseer Ud Din (Naseer Flour Mills)</b><br>House No.B-737, B Block, Tariq Road, St Town Rawalpindi                        | Naseer ud Din                                                                     | 37405-6004057-7                                                          | Rafiq ud Din                                                                        | -                                            | 1,045              | -      | 1,045 | -                     | 1,045                                | -                           | 1,045 |
| 152             | <b>Imran Corporation Thatta Garha, Tehsil Pindi Bhattian, District Hafizabad</b>                                            | Shahid Irfan                                                                      | 34302-3213089-1                                                          | Sarifaz Khan                                                                        | 1,450                                        | 1,254              | 70     | 2,774 | -                     | 1,290                                | 70                          | 1,360 |
| 153             | <b>AI-Kashif Enterprises</b><br>Paris Road, Sialkot"                                                                        | Azhar Munir                                                                       | 34603-1090308-5                                                          | Munir Ahmad                                                                         | 2,456                                        | 6,887              | 18     | 9,361 | -                     | 7,010                                | 18                          | 7,028 |
| 154             | <b>Good Shoes</b><br>P-358, 10 Diglus pura, Faisalabad                                                                      | Muhammad Mukarram                                                                 | 33102-1809505-7                                                          | Muhammad Akram                                                                      | 1,197                                        | 2,453              | 93     | 3,743 | -                     | 2,454                                | 93                          | 2,547 |

## Statement showing written-off loans or any other financial relief of five hundred thousand or above provided during the year 2020

| Sr. No.         | Name and address of the borrower                                                                 | Name of individuals/ partners/ directors                                                   |                                                       | Father's /Husband's name                                            | Outstanding liabilities at beginning of year |                    |        | Principal Written off | Interest/ Markup Written off/ waived | Other Fin. Reliefs Provided | Total |       |
|-----------------|--------------------------------------------------------------------------------------------------|--------------------------------------------------------------------------------------------|-------------------------------------------------------|---------------------------------------------------------------------|----------------------------------------------|--------------------|--------|-----------------------|--------------------------------------|-----------------------------|-------|-------|
|                 |                                                                                                  | Name                                                                                       | NIC No.                                               |                                                                     | Principal                                    | Interest / mark up | Others |                       |                                      |                             |       | Total |
| <b>Domestic</b> |                                                                                                  |                                                                                            |                                                       |                                                                     |                                              |                    |        |                       |                                      |                             |       |       |
| 155             | <b>Shaheen Kiran</b><br>150 Sarfraz Rafiq Road,<br>Cantt Lahore.                                 | Shaheen Kiran                                                                              | 35201-9415544-2                                       | Jehanzab Qureshi                                                    | 556                                          | 3,623              | 54     | 4,233                 | -                                    | 3,483                       | 54    | 3,537 |
| 156             | <b>Javaid Iqbal</b><br>House#30, Block K-2<br>Wapda Town Lahore                                  | Javaid Iqbal<br>Asim Iqbal                                                                 | 35202-2701922-3<br>35202-2701918-9                    | Sarfraz Ahmed                                                       | -                                            | 1,109              | 67     | 1,176                 | -                                    | 1,109                       | 67    | 1,176 |
| 157             | <b>Muhammad Amir Attique</b><br>Data Nagar Badami Bagh<br>9 B Lahore.                            | Muhammad Amir Attique                                                                      | 35202-2539918-3                                       | Muhammad Siddique                                                   | -                                            | 534                | 19     | 553                   | -                                    | 534                         | 19    | 553   |
| 158             | <b>Amir Shahzad</b><br>Shah Kamal Road,<br>Mughalpura, Lahore.                                   | Amir Shahzad                                                                               | 35201-4665788-3                                       | Muhammad Riaz Akhtar                                                | -                                            | 769                | 15     | 784                   | -                                    | 769                         | 15    | 784   |
| 159             | <b>Sh. Rasheed &amp; Sons</b><br>Narang Mandi, Mohallah<br>SheikhanThana Abadi,<br>Narang Mandi. | Abdul Hadi                                                                                 | 35401-7933430-9                                       | Muhammad Rashid                                                     | -                                            | 681                | 68     | 749                   | -                                    | 681                         | 68    | 749   |
| 160             | <b>Sohaib Munir</b><br>House No: F-18, Al-<br>Makkiyah Society, Butt<br>Chowk, Lahore.           | Sohaib Munir                                                                               | 35202-8093810-9                                       | Munir Ahmed Tariq                                                   | -                                            | 677                | 18     | 695                   | -                                    | 677                         | 18    | 695   |
| 161             | <b>Ice Berg</b><br>House#20, Block B,<br>GEOHS, Model Town Link<br>Road, Lahore.                 | Syed Gul Abid                                                                              | 35200-1423120-5                                       | Syed Ali Abid                                                       | -                                            | 979                | -      | 979                   | -                                    | 979                         | -     | 979   |
| 162             | <b>Abdul Samad/Salam/ Sani</b><br>134-A-1 Gulberg III Ghalib<br>Market Lahore                    | Abdul Salam<br>Abdul Samad<br>Abdul Sani                                                   | 35200-1488952-3<br>35202-2231223-1<br>35202-2017018-7 | Abdul Ghani Ch.<br>Abdul Ghani Ch.<br>Abdul Ghani Ch.               | -                                            | 4,091              | 19     | 4,110                 | -                                    | 4,091                       | 19    | 4,110 |
| 163             | <b>Rana Liaqat Ali</b><br>House #1, Block 29,<br>Sodival Colony,<br>Multan Road, Lahore.         | Rana Liaqat Ali                                                                            | 35202-4973490-7                                       | Chaudhary Muhammad Hussain                                          | -                                            | 1,398              | 17     | 1,415                 | -                                    | 1,398                       | 17    | 1,415 |
| 164             | <b>Atfal Agro Industries</b><br>Atfal Chambers Meload<br>Road, Lahore.                           | Mr. Muhammad<br>Shahid Atfal<br>Mr. Muhammad<br>Amjad Atfal<br>Mr. Muhammad Wasil<br>Amjad | 35200-1548339-7<br>35200-1548348-7<br>35200-1548339-1 | Haji Muhammad Afzal<br>Hajid Muhammad Afzal<br>Muhammad Amjad Afzal | -                                            | 2,148              | 17     | 2,165                 | -                                    | 2,148                       | 17    | 2,165 |
| 165             | <b>Amir &amp; Co.</b><br>4-K.M. Narowal Road,<br>Muridke.                                        | Amir Shahzad<br>Adeel Ashraf<br>Muhammad Ashraf                                            | 35201-3559789-7<br>35202-2559795-7<br>35202-1017148-7 | Muhammad Ashraf<br>Muhammad Ashraf<br>Mian Din Muhammad             | -                                            | 1,071              | 47     | 1,118                 | -                                    | 1,071                       | 47    | 1,118 |
| 166             | <b>Khalid Mehmood Chaudhry</b><br>House No. 414, Ravi<br>Block, Allama Iqbal Town,<br>Lahore     | Khalid Mehmood<br>Chaudhry                                                                 | 35200-1529618-3                                       | Chaudhry Abdul Rehman                                               | 485                                          | 2,208              | 72     | 2,765                 | -                                    | 2,088                       | 72    | 2,160 |

## Annexure I

## Statement showing written-off loans or any other financial relief of five hundred thousand or above provided during the year 2020

| Sr. No.         | Name and address of the borrower                                                                                                                             | Name of individuals/ partners/ directors          |                                                       | Father's /Husband's name                   | Outstanding liabilities at beginning of year |                    |        |       | Principal Written off | Interest/ Markup Written off/ waived | Other Fin. Reliefs Provided | Total |
|-----------------|--------------------------------------------------------------------------------------------------------------------------------------------------------------|---------------------------------------------------|-------------------------------------------------------|--------------------------------------------|----------------------------------------------|--------------------|--------|-------|-----------------------|--------------------------------------|-----------------------------|-------|
|                 |                                                                                                                                                              | Name                                              | NIC No.                                               |                                            | Principal                                    | Interest / mark up | Others | Total |                       |                                      |                             |       |
| <b>Domestic</b> |                                                                                                                                                              |                                                   |                                                       |                                            |                                              |                    |        |       |                       |                                      |                             |       |
| 167             | <b>Ghulam Shabbir</b><br>House No: 2, Mohalla,<br>Kachha Rahim Road,<br>Mistri Shah, Lahore.                                                                 | Ghulam Shabbir                                    | 35202-3453276-9                                       | Muhammad Ramzan                            | -                                            | 1,542              | 47     | -     | 1,542                 | 47                                   | 1,589                       |       |
| 168             | <b>Imran Jaffery</b><br>House No: 122-A, Askari<br>Flats, Gulbeg III, Lahore.                                                                                | Imran Jaffery                                     | 35200-4768906-7                                       | Nawazish Ali Jaffery                       | -                                            | 1,838              | 80     | -     | 1,838                 | 80                                   | 1,918                       |       |
| 169             | <b>"Green Tech International</b><br>4-K.M. Narowal Road,<br>Muridke.                                                                                         | Naeem Kibria Bhatti<br>Ejaz Ahmed                 | 35202-2961155-3<br>35202-4739328-7                    | Ghulam Kibria Bhatti<br>Niaz Ahmed         | -                                            | 2,561              | 17     | -     | 2,561                 | 17                                   | 2,578                       |       |
| 170             | <b>Al Madina Medical Store</b><br>544/Huma Block Allama<br>Iqbal Town Lahore.                                                                                | Mateen Ahmed                                      | 35202-8243712-5                                       | Mukhtar Ahmed                              | -                                            | 1,914              | 47     | -     | 1,914                 | 47                                   | 1,961                       |       |
| 171             | <b>Khurram Shahzad</b><br>St.#5-Fkotli Per Abdul<br>Rehman Rasheed H#4-A<br>Lahore                                                                           | Khurram Shahzad<br>Safia Bibi<br>Aslam Zia        | 35201-3741496-7<br>35201-3273263-2<br>35201-5521292-5 | Aslam Zia<br>Aslam Zia<br>Muhamamd Hussain | -                                            | 584                | 62     | -     | 584                   | 62                                   | 646                         |       |
| 172             | <b>Aslam Filling Station</b><br>Vehari Road Multan                                                                                                           | Malik Muhammad Aslam                              | 36302-0270481-7                                       | Haji Allah Wasaya                          | 78                                           | 1,000              | 17     | -     | 980                   | 17                                   | 997                         |       |
| 173             | <b>Rahi Filling Station</b><br>Vehari Road Multan                                                                                                            | Malik Muhammad Aslam                              | 36302-0270481-7                                       | Haji Allah Wasaya                          | 99                                           | 1,417              | 17     | -     | 1,418                 | 17                                   | 1,435                       |       |
| 174             | <b>Pakistan Traders</b><br>Ghailah Mandi<br>Banawalpur                                                                                                       | Maqsood Alam                                      | 35200-1562539-1                                       | Abdul Majeed                               | -                                            | 959                | 17     | -     | 959                   | 17                                   | 976                         |       |
| 175             | <b>Khawaja Abid Hussain</b><br>House # 24 New Timber<br>Market, Multan                                                                                       | Khawaja Abid Hussain                              | 36302-6159197-9                                       | Aashiq Hussain                             | -                                            | 6,242              | 66     | -     | 6,242                 | 66                                   | 6,308                       |       |
| 176             | <b>Ittefaq Corporation</b><br>Chowk B.C.G, Vehari<br>Road Multan.                                                                                            | Muhammad Nisar<br>Dildar Ahmad<br>Faqeer Muhammad | 36303-2763026-5<br>36303-7417443-1<br>36303-0975636-7 | Hakeem<br>Hakeem<br>Abdul Aziz             | -                                            | 14,968             | -      | -     | 14,968                | -                                    | 14,968                      |       |
| 177             | <b>Pak Goods Transport Company</b><br>593-Banawalpur By Pass<br>Chowk Multan.                                                                                | Muhammad Nisar<br>Muhammad Ajmal Niaz             | 36303-2763026-5<br>36302-1413702-5                    | Hakeem<br>Chaudhry Niaz Ahmad              | -                                            | 640                | 17     | -     | 640                   | 17                                   | 657                         |       |
| 178             | <b>Alah Wali Medicine Company</b><br>Zahid Ali Ledge Aziz street<br>H # 1499/3-E Khawaja<br>Colony Railway Road<br>Multan                                    | Muhammad Zahid Saeed<br>Sheikh                    | 36302-1139784-1                                       | Shekh Muhammad Khalid<br>Saeed             | -                                            | 1,093              | 66     | -     | 1,093                 | 66                                   | 1,159                       |       |
| 179             | <b>Amar Shahheed Traders</b><br>House # D-255, T.C. #<br>398, Situated at Hindu<br>Muhalla, Near Krishan<br>Nagar, Den Dahanaki,<br>Deharki, District Ghotki | Gurdas Mal                                        | 45101-9196949-9                                       | Wapari Mal                                 | -                                            | 1,219              | 100    | -     | 1,219                 | 100                                  | 1,319                       |       |

## Statement showing written-off loans or any other financial relief of five hundred thousand or above provided during the year 2020

| Sr. No.         | Name and address of the borrower                                                                                                              | Name of individuals/ partners/ directors                                                                                    |                                                                                                                                   | Father's /Husband's name                                                                                                             | Outstanding liabilities at beginning of year |                    |        |         | Principal Written off | Interest/ Markup Written off/ waived | Other Fin. Reliefs Provided | Total   |
|-----------------|-----------------------------------------------------------------------------------------------------------------------------------------------|-----------------------------------------------------------------------------------------------------------------------------|-----------------------------------------------------------------------------------------------------------------------------------|--------------------------------------------------------------------------------------------------------------------------------------|----------------------------------------------|--------------------|--------|---------|-----------------------|--------------------------------------|-----------------------------|---------|
|                 |                                                                                                                                               | Name                                                                                                                        | NIC No.                                                                                                                           |                                                                                                                                      | Principal                                    | Interest / mark up | Others | Total   |                       |                                      |                             |         |
| <b>Domestic</b> |                                                                                                                                               |                                                                                                                             |                                                                                                                                   |                                                                                                                                      |                                              |                    |        |         |                       |                                      |                             |         |
| 180             | <b>Noor Muhammad Shah</b><br>Village Wasi Malook Shah,<br>Taluka & District Tando<br>Muhammad Khan                                            | Noor Muhammad Shah                                                                                                          | 41308-0488317-5                                                                                                                   | S/o. Syed Shahzad Shah                                                                                                               | 50                                           | 1,006              | 25     | 1,081   | -                     | 755                                  | 25                          | 780     |
| 181             | <b>Muhammad Sheraz Qureshi</b><br>(House No. B-102, Mallir<br>Halt, Shehrafaisal Town,<br>Karachi)                                            | Muhammad Sheraz Qureshi                                                                                                     | 42301-3321612-9                                                                                                                   | Muhammad Shoab Qureshi                                                                                                               | 1,260                                        | 1,104              | -      | 2,364   | -                     | 1,085                                | -                           | 1,085   |
| 182             | <b>Samee Ullah Traders Through Muhammad Nawaz -Proprietor</b><br>Narowal Zatarwal Road,<br>Village Saddowala Uncha,<br>Tehsil & Distt Narowal | Muhammad Nawaz                                                                                                              | 34501-5145318-7                                                                                                                   | Babu Khan                                                                                                                            | 599                                          | 1,571              | 52     | 2,222   | -                     | 1,587                                | 52                          | 1,639   |
| 183             | <b>Umer Khalid &amp; Company,</b><br>Street # 2 Mohallah<br>Hassan Colony Rahim<br>Yar Khan Tehsil & District<br>Rahim Yar Khan.              | Mr. Mian Khalid Mehmood                                                                                                     | 31303-9029704-3                                                                                                                   | S/o Mr. Mian Ghulam Muhammad                                                                                                         | 3,606                                        | 2,065              | 92     | 5,763   | -                     | 2,166                                | 92                          | 2,258   |
| 184             | <b>Paaris Communication:-</b><br>House No. P-375, Street<br>No.06, Redex Road Nisar<br>Colony Faisalabad                                      | Haji Tahir Razzaq                                                                                                           | 33100-5720478-9                                                                                                                   | Muhammad Razzaq Ahmed                                                                                                                | 1,450                                        | 1,129              | 47     | 2,626   | -                     | 1,162                                | 47                          | 1,209   |
| 185             | <b>Sheikh Ashfaq Hussain &amp; Sons:-</b><br>Main Bazar Gojra District<br>toba Tek Sing                                                       | Sheikh Ashfaq Hussain<br>Blial Shahzad<br>Muhammad Usman<br>Shshzad                                                         | 33301-7129999-5<br>33301-7224999-5<br>33301-5464298-7                                                                             | Sheikh Bagh Hussain<br>Sheikh Ashfaq Hussain<br>Sheikh Ashfaq Hussain                                                                | 780                                          | 1,046              | 69     | 1,895   | -                     | 1,053                                | 69                          | 1,122   |
| 186             | <b>Nina Industries Ltd.</b><br>A-29/A, Manghopir Road,<br>Karachi                                                                             | Waqar A. Sattar<br>Saeed A. Sattar<br>Urooj Saeed<br>Kashif Saeed Sattar<br>Yasir Waqar<br>Muzafer S. Khan<br>Ansar Hussain | 42201-6071516-3<br>42201-0937336-9<br>42301-5809641-9<br>42000-5177233-5<br>42201-3174193-5<br>42101-8184503-7<br>42301-0799773-1 | Sheikh Abdul Sattar<br>Sheikh Abdul Sattar<br>Saeed A. Sattar<br>Saeed A. Sattar<br>Waqar A. Sattar<br>A S Khan<br>(Late) Jaffer Ali | 90,916                                       | 130,207            | 1,942  | 223,065 | 90,916                | 130,207                              | 1,942                       | 223,065 |
| 187             | <b>M.Asif Butt</b><br>House # 16-A Mehmood<br>Road, New Samnabad,<br>Lahore.                                                                  | M Asif Butt                                                                                                                 | 35202-7383230-7                                                                                                                   | M. Afzal Butt                                                                                                                        | 1,652                                        | 1,566              | -      | 3,218   | -                     | 1,602                                | -                           | 1,602   |
| 188             | <b>Ansar Khan</b><br>Latko Chak, Tehsil Shakar<br>Ghar, District Narowal                                                                      | Mr. Ansar Khan                                                                                                              | 34502-1599685-2                                                                                                                   | Mola Dad Khan                                                                                                                        | -                                            | 1,601              | 67     | 1,668   | -                     | 1,601                                | 67                          | 1,668   |
| 189             | <b>Spinzer Enterprises (Pvt) Ltd</b><br>Plot No. 101, 102,<br>Industrial Estate, Jamrud<br>Road, Peshawar                                     | Shehryar Lodhi<br>Nighat Sheryar Lodhi                                                                                      | 17301-2071286-3<br>17301-2817365-0                                                                                                | Muhammad Yousef Lodhi<br>W/o Shehryar Lodhi                                                                                          | 6,067                                        | 4,725              | -      | 10,792  | -                     | 4,880                                | -                           | 4,880   |



## Annexure I

## Statement showing written-off loans or any other financial relief of five hundred thousand or above provided during the year 2020

| Sr. No.  | Name and address of the borrower                                                                                                | Name of individuals/ partners/ directors |                                     | Father's /Husband's name                     | Outstanding liabilities at beginning of year |                    |        |        | Principal Written off | Interest/ Markup Written off/ waived | Other Fin. Reliefs Provided | Total  |
|----------|---------------------------------------------------------------------------------------------------------------------------------|------------------------------------------|-------------------------------------|----------------------------------------------|----------------------------------------------|--------------------|--------|--------|-----------------------|--------------------------------------|-----------------------------|--------|
|          |                                                                                                                                 | Name                                     | NIC No.                             |                                              | Principal                                    | Interest / mark up | Others | Total  |                       |                                      |                             |        |
| Domestic |                                                                                                                                 |                                          |                                     |                                              |                                              |                    |        |        |                       |                                      |                             |        |
| 190      | <b>Syed Hassan Sami</b><br>House No. 249/B, Sector G-10/4, Islamabad & House No. 10, Street No. 02, Kehkashan Colony Rawalpindi | Syed Hassan Sami                         | 61101-6109414-5                     | Syed Abdul Sami                              | 1,899                                        | 1,279              | -      | 3,178  | -                     | 1,322                                | -                           | 1,322  |
| 191      | <b>Malik Rasheed Ahmad</b><br>Khanqah Shareef Bahawalpur                                                                        | Mr. Malik Rasheed Ahmad                  | 31202-9092109-3                     | S/o Mr. Noor Muhammad                        | 995                                          | 568                | 37     | 1,600  | -                     | 591                                  | 37                          | 628    |
| 192      | <b>Manzoor Ahmad Paracha</b><br>Ghalla Mandi Dera Ghazi Khan                                                                    | Mr. Manzoor Ahmad Paracha                | 32102-0988509-7                     | S/o Mr. Amir Ahmad                           | 2,199                                        | 1,336              | 43     | 3,578  | -                     | 1,397                                | 43                          | 1,440  |
| 193      | <b>Al-Karam Cotton Ginners</b><br>Chak # 25-A, Allahabad Road Liequatpur                                                        | Mr. Nisar Mehmood<br>Mr. Atta Muhammad   | 31302-2354964-9<br>31302-9640717-5  | S/o Mr. Jan Muhammad<br>S/o Mr. Jan Muhammad | 5,685                                        | 10,072             | 67     | 15,824 | -                     | 10,124                               | 67                          | 10,191 |
| 194      | <b>Mehar's Enterprises</b><br>Wakeel Khan Road, Kamoke, Gujranwala                                                              | Waseem Ejaz Chudhary                     | 34101-2660328-1                     | Ejaz Hussain Mehr                            | 31,343                                       | 17,161             | -      | 48,504 | -                     | 17,927                               | -                           | 17,927 |
| 195      | <b>Mian Ahmed Buksh</b><br>House No.145, Block-B, Mohafiz town, Saingodha                                                       | Mian Ahmed Buksh                         | 38401-7476787-9                     | Muhammad Nazir                               | 699                                          | 609                | -      | 1,308  | -                     | 629                                  | -                           | 629    |
| 196      | <b>Babar Hayat</b><br>House # 251, Block A, New Muslim Town Lahore                                                              | Babar Hayat<br>Ghulam Zohra              | 35202-4841286-5,<br>35202-9757619-2 | Ch. Khalid Hayat                             | -                                            | 8,992              | -      | 8,992  | -                     | 8,992                                | -                           | 8,992  |
| 197      | <b>Ikram Nabi</b><br>30/1, 23rd Street, Khayaban-e-Tanzeem, Phase-V, D.H.A., Karachi                                            | Ikram Nabi                               | 42301-5015587-5                     | Sajjad Nabi (Late)                           | 3,900                                        | 1,681              | -      | 5,581  | -                     | 1,808                                | -                           | 1,808  |
| 198      | <b>Syed Arjad Hussain Shah</b><br>Mohalla Macam Sharif, Post Office, Olahi, Khushab                                             | Syed Arjad Hussain Shah                  | 38201-1919068-9                     | Syed Akbar Shah                              | 969                                          | 1,185              | 32     | 2,186  | -                     | 1,112                                | 32                          | 1,144  |
| 199      | <b>Zeeshan Ahmad Siddiqi</b><br>Sattlite Town, Gujranwala                                                                       | Zeeshan Ahmad Siddiqi                    | 34101-2616765-1                     | Imtiaz Ahmad Siddique                        | 76                                           | 502                | 41     | 619    | -                     | 501                                  | 41                          | 542    |
| 200      | <b>Muhammad Kashif</b><br>St 04 Bazar 02 Raazaabad Faisalabad                                                                   | Muhammad Kashif                          | 33100-8223336-5                     | Mukhtar Ahmed                                | 474                                          | 596                | 82     | 1,152  | -                     | 515                                  | 82                          | 597    |
| 201      | <b>Javed Hayat &amp; Khuram Hayat</b><br>both residents of House No. 57, Block R - 1, Johar Town, Lahore                        | Javed Hayat<br>Khuram Hayat              | 35202-7319007-3<br>35202-3323873-9  | Muhammad Hayat<br>Muhammad Hayat             | 9,681                                        | 5,571              | 73     | 15,325 | -                     | 5,855                                | 73                          | 5,928  |

## Statement showing written-off loans or any other financial relief of five hundred thousand or above provided during the year 2020

| Sr. No.         | Name and address of the borrower                                                                       | Name of individuals/ partners/ directors                            |                                                       | Father's /Husband's name                                                             | Outstanding liabilities at beginning of year |                    |        | Principal Written off | Interest/ Markup Written off/ waived | Other Fin. Reliefs Provided | Total  |
|-----------------|--------------------------------------------------------------------------------------------------------|---------------------------------------------------------------------|-------------------------------------------------------|--------------------------------------------------------------------------------------|----------------------------------------------|--------------------|--------|-----------------------|--------------------------------------|-----------------------------|--------|
|                 |                                                                                                        | Name                                                                | NIC No.                                               |                                                                                      | Principal                                    | Interest / mark up | Others |                       |                                      |                             |        |
| <b>Domestic</b> |                                                                                                        |                                                                     |                                                       |                                                                                      |                                              |                    |        |                       |                                      |                             |        |
| 202             | <b>Saifullah Bhatti &amp; Company</b><br>Bhatti Town, Sharakpur Sharif, Distt: Sheikhupura.            | Saif Ullah Bhatti                                                   | 35401-2039836-5                                       | Muhammad Sarwar                                                                      | 375                                          | 765                | -      | 1,140                 | 692                                  | -                           | 692    |
| 203             | <b>Universal Tyre Traders</b><br>Multan Road, Lahore.                                                  | Muhammad Nadeem                                                     | 35202-3005236-5                                       | Muhammad Shafi                                                                       | 1,572                                        | 1,222              | 77     | 2,871                 | 1,215                                | 77                          | 1,292  |
| 204             | <b>Naeem Traders</b><br>House 48, Survey # NE-III-48, Hammad Colony, Mouza Baghanwala, Lahore.         | Muhammad Naeem<br>Muhammad Umer<br>Muhammad Usman                   | 35202-3348039-7<br>35202-9510325-5<br>35202-3442089-7 | Haji Ismail                                                                          | 9,000                                        | 11,430             | 17     | 20,447                | 11,568                               | 17                          | 11,585 |
| 205             | <b>Shahid Hussain Chaudhry</b><br>HH131, Umar Block, Allama Iqbal Town, Lahore.                        | Shahid Hussain Chaudhry                                             | 35202-2958356-5                                       | Ch. Ghulam Hussain                                                                   | 6,117                                        | 4,107              | 17     | 10,241                | 4,291                                | 17                          | 4,308  |
| 206             | <b>Usman Enterprises</b><br>Noor Rice Mill, Ghallah Mandi, Alipur Chattha.                             | Muhammad Usman<br>Chattha                                           | 35202-1167746-9                                       | Riaz Ahmad Chattha                                                                   | 493                                          | 2,365              | 17     | 2,875                 | 1,871                                | 17                          | 1,888  |
| 207             | <b>Haseeb Traders</b><br>Mohallah, Normal School, Ghakhar Mandi, Gujranwala                            | Basharat Ali                                                        | 34104-2304870-9                                       | Rehmat Ali                                                                           | 218                                          | 552                | 47     | 817                   | 557                                  | 47                          | 604    |
| 208             | <b>Hi Knit Pvt Limited</b><br>Plot # 3, Sector 12-D North Karachi Ind Area Karachi                     | Syed Jawed Mustafa<br>Mahad Mustafa                                 | 42301-6661443-1<br>42301-7559437-7                    | Syed Muhammad Mustafa<br>Syed Jawed Mustafa                                          | 9,318                                        | 21,468             | -      | 30,786                | 21,468                               | -                           | 30,786 |
| 209             | <b>Sultan Flour Mills</b><br>Jampur Road D.G.Khan.                                                     | Mr. Khaliq Mehmood<br>Mr. Javed Iqbal                               | 32102-0950584-5<br>32102-8697318-1                    | S/o Mr. Muhammad<br>S/o Mr. Muhammad<br>Azeem                                        | 8,000                                        | 6,425              | 16     | 14,441                | 6,645                                | 16                          | 6,661  |
| 210             | <b>Al-Khaliq Flour Mills</b><br>Jampur Road D.G.Khan.                                                  | Mr. Khaliq Mehmood                                                  | 32102-0950584-5                                       | S/o Mr. Muhammad<br>Azeem                                                            | 3,548                                        | 4,434              | 86     | 8,068                 | 4,531                                | 86                          | 4,617  |
| 211             | <b>Muhammad Nawaz-</b><br>Lubna Akram<br>HH#43-A, Nazim Abad, Jhang Road, Faisalabad.                  | Muhammad Nawaz<br>Lubna Akram                                       | 33100-7580792-5<br>33100-0807282-4                    | Abdul Hameed<br>Akram                                                                | 812                                          | 493                | -      | 1,305                 | 512                                  | -                           | 512    |
| 212             | <b>Akram &amp; Brothers</b><br>63-B-Grain Market Vehari                                                | Mr. Muhammad Akram                                                  | 36603-8604946-3                                       | S/o Mr. Jamal Din                                                                    | 564                                          | 566                | 17     | 1,147                 | 577                                  | 17                          | 594    |
| 213             | <b>Move (Pvt.) Ltd</b><br>Shah Rukne Alam Colony Multan                                                | Mr. Manzoor Ul Haq<br>Mr. Muhammad Zia Ul Haq<br>Mst. Kaneez Fatima | 36302-9989167-1<br>36302-1345146-3<br>36302-5613085-2 | S/o Mr. Chaudhry Bag<br>Muhammad<br>S/o Mr. Manzoor Ul Haq<br>W/o Mr. Manzoor Ul Haq | 1,164                                        | 914                | 100    | 2,178                 | 933                                  | 100                         | 1,033  |
| 214             | <b>Rafique Steel</b><br>S.S. Centre, Ireland Road, Off Nishitar Road, Lawrence Quarters, Karachi-74200 | Muhammad Rafiq                                                      | 42101-5981988-5                                       | Muhammad Shafi                                                                       | 27,679                                       | 19,003             | 70     | 46,752                | 19,635                               | 70                          | 19,705 |

## Annexure I

## Statement showing written-off loans or any other financial relief of five hundred thousand or above provided during the year 2020

| Sr. No.         | Name and address of the borrower                                                                                         | Name of individuals/ partners/ directors                                                           |                                                                                                      | Father's /Husband's name                                                                                                                         | Outstanding liabilities at beginning of year |                    |        | Principal Written off | Interest/ Markup Written off/ waived | Other Fin. Reliefs Provided | Total   |
|-----------------|--------------------------------------------------------------------------------------------------------------------------|----------------------------------------------------------------------------------------------------|------------------------------------------------------------------------------------------------------|--------------------------------------------------------------------------------------------------------------------------------------------------|----------------------------------------------|--------------------|--------|-----------------------|--------------------------------------|-----------------------------|---------|
|                 |                                                                                                                          | Name                                                                                               | NIC No.                                                                                              |                                                                                                                                                  | Principal                                    | Interest / mark up | Others |                       |                                      |                             |         |
| <b>Domestic</b> |                                                                                                                          |                                                                                                    |                                                                                                      |                                                                                                                                                  |                                              |                    |        |                       |                                      |                             |         |
| 215             | <b>Al Noor Fertilizer Industries Limited</b><br>96-A, Sindhi Muslim Society Karachi                                      | Zia I Zakaria<br>Ismail H Zakaria<br>Elias M Zakaria<br>Yusuf Ayoob<br>Suleman Ayoob<br>Aziz Ayoob | 42201-1110269-9<br>514-35-072090<br>514-26-006142<br>517-38-000413<br>514-90-149300<br>514-86-012334 | Ismail h Zakaria<br>Haji Zakaria Osman (Late)<br>Heji Zakaria Osman (Late)<br>Muhammad Ayoob (Late)<br>Muhammad Ayoob (Late)<br>Nazir Ahmed Khan | -                                            | 117,125            | -      | 80,625                | -                                    | -                           | 80,625  |
| 216             | <b>International Manufacturing Company</b><br>House # 1 Railway Golf Avenue Dharan Pura Canal Bridge Lahore              | Khalil Ahmed Khan                                                                                  | 35201-1245373-5                                                                                      |                                                                                                                                                  | 1,178                                        | 4,605              | 469    | 4,605                 | -                                    | -                           | 5,074   |
| 217             | <b>Bilal Textile (Pvt) Ltd</b><br>P-34, Muslim Town, Officers Block, Near Dar-ul-Quran Behind Crescent Mills, Faisalabad | Muhammad Saleem Umer                                                                               | 33100-0902344-5                                                                                      | Mian Muhammad Umer                                                                                                                               | 29,222                                       | 216,983            | 15     | 217,792               | 15                                   |                             | 237,661 |
| 218             | <b>Rehmat Wazir Textile Mills Ltd</b><br>2Km Joyanwala More, Lahore Road, Sheikhpura.                                    | MUHAMMAD NASEER SHEIKH                                                                             | 35202-5720954-7                                                                                      | SHEIKH RAHMAT ALI                                                                                                                                | -                                            | 170,315            | -      | 170,315               | -                                    |                             | 170,315 |
| 219             | <b>Rehmat Wazir Textile Mills Ltd</b><br>2Km Joyanwala More, Lahore Road, Sheikhpura.                                    | MUHAMMAD NAVEED REHMAT                                                                             | 35202-6016395-1                                                                                      | SHEIKH RAHMAT ALI                                                                                                                                | -                                            | 8,154              | -      | 8,154                 | -                                    |                             | 8,154   |
| 220             | <b>Rehmat Wazir Textile Mills Ltd</b><br>2Km Joyanwala More, Lahore Road, Sheikhpura.                                    | WAZIR BEGUM                                                                                        | 35202-6070430-4                                                                                      | W/O SHEIKH RAHMAT ALI                                                                                                                            | 119,226                                      | 159,504            | 19     | 161,743               | 19                                   |                             | 250,388 |
| 221             | <b>Popolar Industries</b><br>Toor Abad, Daska Road, Sialkot.                                                             | "SHAHEEN BAIG SALEEM MIRZA BAIG"                                                                   | "34603-3547566-3<br>34603-5328312-1"                                                                 | "MUHAMMAD BAIG MUHAMMAD BAIG"                                                                                                                    | -                                            | 15,744             | -      | 12,744                | -                                    |                             | 12,744  |
| 222             | <b>Azmat Ali Khan</b><br>Mohalla Imarnkot, Jalalpur Bhattian, Tehsil Pindi Bhattian, District Hafizabad                  | Azmat Ali Khan                                                                                     | 34302-5609048-1                                                                                      | Muhammad Khan                                                                                                                                    | 957                                          | 543                | 67     | 498                   | 67                                   |                             | 565     |
| 223             | <b>Iqbal Hussain</b><br>563-24/A, Model Town Gujranwala                                                                  | Iqbal Hussain                                                                                      | 34101-2593426-1                                                                                      | Shah Muhammad                                                                                                                                    | 1,953                                        | 1,380              | -      | 1,438                 | -                                    |                             | 1,438   |
| 224             | <b>Minhas Industries</b><br>Ferozwala, S # 5, Shazada Shaheed Colony Gujranwala                                          | Munawar Hussain Minhas                                                                             | 37301-2358190-7                                                                                      | Muhammad Anwar Minhas                                                                                                                            | -                                            | 4,647              | 87     | 4,647                 | 87                                   |                             | 4,734   |

## Statement showing written-off loans or any other financial relief of five hundred thousand or above provided during the year 2020

| Sr. No.         | Name and address of the borrower                                                                   | Name of individuals/ partners/ directors              |                                                       | Father's /Husband's name                                  | Outstanding liabilities at beginning of year |                    |               |                  | Principal Written off | Interest/ Markup Written off/ waived | Other Fin. Reliefs Provided | Total            |
|-----------------|----------------------------------------------------------------------------------------------------|-------------------------------------------------------|-------------------------------------------------------|-----------------------------------------------------------|----------------------------------------------|--------------------|---------------|------------------|-----------------------|--------------------------------------|-----------------------------|------------------|
|                 |                                                                                                    | Name                                                  | NIC No.                                               |                                                           | Principal                                    | Interest / mark up | Others        | Total            |                       |                                      |                             |                  |
| <b>Domestic</b> |                                                                                                    |                                                       |                                                       |                                                           |                                              |                    |               |                  |                       |                                      |                             |                  |
| 225             | <b>Ranjha Trading Co.</b><br>Bhabra Road, Mouza Wan<br>Miana, Tehsil Kotmoman<br>District Sargodha | Muhammad Iqbal                                        | 38401-0252726-5                                       | Bahoo Khan                                                | 4,999                                        | 1,621              | 67            | 6,687            | -                     | 1,620                                | 67                          | 1,687            |
| 226             | <b>Babar Khan Lodhi &amp; Abdul Rasheed</b><br>House # 197, Block B,<br>Gulshan-e-Ravi, Lahore     | Babar Khan Lodhi<br>Abdul Rasheed                     | 35202-7894730-7<br>35202-2143094-7                    | Abdul Rasheed<br>Ata Muhammad                             | 2,129                                        | 1,755              | 110           | 3,994            | -                     | 1,548                                | 110                         | 1,658            |
| 227             | <b>K-2 Hosiery (Pvt) Limited</b><br>2 - N, Gulberg II, Industrial<br>Area, Lahore                  | Hassan Mumtaz<br>Mehryar Saigol<br>Saeed Khalid Uppal | 35202-2957290-3<br>42301-2403429-5<br>35202-1475288-3 | Hussain Mumtaz<br>M. Shakeel Saigol<br>Khalid Javed Uppal | 8,139                                        | 8,963              | 77            | 17,179           | 3,139                 | 9,096                                | 77                          | 12,312           |
| 228             | <b>Al-Mehnaz Traders</b><br>Street Kambohara,<br>Ferozabad, Distt.<br>Sheikhopura                  | Muhammad Zafar Ullah<br>Mst. Musarat Nasrullah        | 35404-6987159-3                                       | Hafiz Meraj Diin<br>Muhammad Zafar Ullah                  | 469                                          | 2,395              | 28            | 2,892            | -                     | 2,334                                | 28                          | 2,362            |
| 229             | <b>M. Arif Sheikh</b><br>2B Commercial Phase,<br>DHA Lahore                                        | M. Arif Sheikh                                        | 37406-9390218-5                                       | Sheikh Niaz Ahmed                                         | 12,006                                       | 1,529              | -             | 13,535           | -                     | 1,905                                | -                           | 1,905            |
| 230             | <b>Sahaba International</b><br>Islamia Park, Nasir Road,<br>Street No. 10, Sialkot                 | Asif Ali                                              | 34603-4213491-3                                       | Umar Hayat                                                | 1,046                                        | 3,424              | -             | 4,470            | -                     | 3,432                                | -                           | 3,432            |
| 231             | <b>Benish Khan</b><br>House No. 52-C-2,<br>Gulberg - III, Lahore                                   | Benish Khan                                           | 35202-5120669-8                                       | Naseer Khan                                               | 9,243                                        | 9,004              | 166           | 18,413           | -                     | 9,329                                | 166                         | 9,495            |
|                 |                                                                                                    |                                                       |                                                       |                                                           | <b>607,062</b>                               | <b>2,230,023</b>   | <b>13,749</b> | <b>2,850,834</b> | <b>299,535</b>        | <b>2,192,855</b>                     | <b>13,671</b>               | <b>2,506,061</b> |

## Disposal of fixed assets (refer note 11.2.6)

| Description      | Cost/<br>revalued<br>amount | Accumu-<br>lated<br>depreciation | Book value | Sales pro-<br>ceeds | Mode of disposal     | Particulars of buyers | Location |
|------------------|-----------------------------|----------------------------------|------------|---------------------|----------------------|-----------------------|----------|
| (Rupees in '000) |                             |                                  |            |                     |                      |                       |          |
| <b>Computers</b> |                             |                                  |            |                     |                      |                       |          |
| Laptop           | 88                          | 88                               | -          | 9                   | As per Bank's policy | Muhammad Ali          | Lahore   |
| Laptop           | 116                         | 116                              | -          | 12                  | As per Bank's policy | Usman Hassan          | Lahore   |
| Laptop           | 334                         | 100                              | 244        | 258                 | As per Bank's policy | Nabeela Waheed        | Lahore   |
| Laptop           | 236                         | 197                              | 39         | 44                  | As per Bank's policy | Nadeem Afzal Khan     | Lahore   |
|                  | <b>784</b>                  | <b>501</b>                       | <b>283</b> | <b>323</b>          |                      |                       |          |



# Consolidated Financial Statements

MCB Bank Limited

## Directors' Report

### On Consolidated Financial Statements

The Board of Directors present the report on the consolidated financial statements of MCB Bank Limited and its subsidiaries namely MCB – Arif Habib Savings & Investments Limited, MCB Islamic Bank Limited, Financial & Management Services (Private) Limited and MCB Non-Banking Credit Organization Closed Joint Stock Company for the year ended December 31, 2020.

#### Profit and Appropriation

The profit before and after taxation for the year ended December 31, 2020 together with appropriations is as under:

|                                                                                                                                       | Rs. in Million |
|---------------------------------------------------------------------------------------------------------------------------------------|----------------|
| <b>Profit before taxation</b>                                                                                                         | <b>49,318</b>  |
| Taxation                                                                                                                              | 19,756         |
| <b>Profit after taxation</b>                                                                                                          | <b>29,562</b>  |
| Profit attributable to non-controlling interest                                                                                       | (152)          |
| <b>Profit attributable to ordinary shareholders</b>                                                                                   | <b>29,410</b>  |
| Un-appropriated profit brought forward                                                                                                | 56,109         |
| Re-measurement of defined benefit plans - net of tax                                                                                  | (342)          |
| Surplus realized on disposal of revalued fixed assets - net of tax                                                                    | 22             |
| Surplus realized on disposal of non-banking assets - net of tax                                                                       | 4              |
| Transferred in respect of incremental depreciation from surplus on revaluation of fixed assets to un-appropriated profit - net of tax | 91             |
|                                                                                                                                       | <b>55,884</b>  |
| <b>Profit available for appropriation</b>                                                                                             | <b>85,294</b>  |
| Appropriations:                                                                                                                       |                |
| Statutory reserve                                                                                                                     | 2,945          |
| Final cash dividend at Rs. 5.0 per share - December 31, 2019                                                                          | 5,925          |
| Interim cash dividend at Rs. 5.0 per share - March 31, 2020                                                                           | 5,925          |
| <b>Total appropriations</b>                                                                                                           | <b>14,795</b>  |
| <b>Un-appropriated profit carried forward</b>                                                                                         | <b>70,499</b>  |

#### Earnings per Share

The consolidated financial statements reflect Rs. 24.82 earnings per share for year under review.

For and on behalf of the Board of Directors,



**Imran Maqbool**  
President & CEO  
MCB Bank Limited

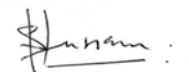

**Shahzad Hussain**  
Director  
MCB Bank Limited

February 10, 2021



## ڈائریکٹرز رپورٹ

بورڈ آف ڈائریکٹرز ایم سی بی بینک لمیٹڈ اور اس کے ذیلی اداروں جن میں عارف حبیب سیونگر اینڈ اسٹوٹ لمیٹڈ، ایم سی بی اسلامک بینک لمیٹڈ، فنانشل اینڈ مینجمنٹ سروسز (پرائیویٹ) لمیٹڈ اور ایم سی بی ٹرانس بینک کریڈٹ آرگنائزیشن گورنرز جو انجمن اسٹاک کھٹی شامل ہیں، کی مجموعی مالیاتی اسٹیٹمنٹس برائے سال ختمہ 31 دسمبر 2020ء پر رپورٹ پیش کرتے ہیں۔

منافع اور تخصیص:

31 دسمبر 2020ء کو اختتام پذیر سال میں منافع قبل و بعد از ٹیکس اور تخصیص، مندرجہ ذیل ہے:

| ملین روپے |                                                                  |
|-----------|------------------------------------------------------------------|
| 49,318    | منافع قبل از ٹیکس                                                |
| 19,756    | ٹیکس                                                             |
| 29,562    | منافع بعد از ٹیکس                                                |
| (152)     | ٹران کنٹرولنگ انٹرسٹ کے لیے تفویض شدہ منافع                      |
| 29,410    | عام حصص یافتگان کے لیے تفویض شدہ منافع                           |
| 56,109    | اختتامی غیر تخصیص شدہ منافع                                      |
| (342)     | ڈیفائیڈ بینیفٹ پلان کی تخمینہ نو۔ خالص از ٹیکس                   |
| 22        | پائیدار اثاثوں کے سرپلس پر فروخت سے حاصل آمدن (خالص از ٹیکس)     |
| 4         | غیر بینکاری اثاثوں کے سرپلس پر فروخت سے حاصل آمدن (خالص از ٹیکس) |
| 91        | پائیدار اثاثوں کی تخمینہ نو سے اضافی آمدنی سے منتقلی             |
| 55,884    | تخصیص کے لیے دستیاب منافع                                        |
| 85,294    | تخصیص:                                                           |
| 2,945     | قانونی ریزرو                                                     |
| 5,925     | حتی کیش ڈیویڈنڈ 5 روپے فی حصص 31 دسمبر 2019                      |
| 5,925     | عبوری کیش ڈیویڈنڈ 5 روپے فی حصص 31 مارچ 2020                     |
| 14,795    | کل تخصیص                                                         |
| 70,499    | اختتامی غیر تخصیص شدہ منافع                                      |

آمدنی فی حصص:

مجموعی مالیاتی اسٹیٹمنٹس اس زیر تجزیہ سال کے لیے، 24.82 روپے فی حصص کی آمدنی کو ظاہر کرتے ہیں۔

منجانب و برائے بورڈ آف ڈائریکٹرز

شہزاد حسین

ڈائریکٹر۔ ایم سی بی بینک لمیٹڈ

عمران عتیبول

پریزیڈنٹ اور سی ای او۔

ایم سی بی بینک لمیٹڈ،

10 فروری 2021ء

# Independent Auditor's Report

To the members of MCB Bank Limited

Report on the Audit of the Consolidated Financial Statements

## Opinion

We have audited the annexed consolidated financial statements of MCB Bank Limited and its subsidiaries ("the Group"), which comprise the consolidated statement of financial position as at December 31, 2020 and the consolidated profit and loss account, the consolidated statement of comprehensive income, the consolidated statement of changes in equity and the consolidated statement of cash flows for the year then ended, and notes to the consolidated financial statements, including a summary of significant accounting policies and other explanatory information.

In our opinion, consolidated financial statements give a true and fair view of the consolidated financial position of the Group as at December 31, 2020 and of its consolidated financial performance and its consolidated cash flows for the year then ended in accordance with the accounting and reporting standards as applicable in Pakistan.

## Basis for Opinion

We conducted our audit in accordance with International Standards on Auditing (ISAs) as applicable in Pakistan. Our responsibilities under those standards are further described in the Auditor's Responsibilities for the Audit of the Consolidated Financial Statements section of our report. We are independent of the Group in accordance with the International Ethics Standards Board for Accountants' Code of Ethics for Professional Accountants as adopted by the Institute of Chartered Accountants of Pakistan (the Code) and we have fulfilled our other ethical responsibilities in accordance with the Code. We believe that the audit evidence we have obtained is sufficient and appropriate to provide a basis for our opinion.

## Key Audit Matters

Key audit matters are those matters that, in our professional judgment, were of most significance in our audit of the consolidated financial statements of the current year. These matters were addressed in the context of our audit of the consolidated financial statements as a whole, and in forming our opinion thereon, and we do not provide a separate opinion on these matters.

Following are the Key Audit Matters:

| S. No. | Key Audit Matters                                                                                                                                                                                                                                                                                                                                                                                                                                                                                                                                                                   | How the matter was addressed in our audit                                                                                                                                                                                                                                                                                                                                                                                                                                                                                                                                                                                                                                                                                                                                                                                                                                                                                                                                                         |
|--------|-------------------------------------------------------------------------------------------------------------------------------------------------------------------------------------------------------------------------------------------------------------------------------------------------------------------------------------------------------------------------------------------------------------------------------------------------------------------------------------------------------------------------------------------------------------------------------------|---------------------------------------------------------------------------------------------------------------------------------------------------------------------------------------------------------------------------------------------------------------------------------------------------------------------------------------------------------------------------------------------------------------------------------------------------------------------------------------------------------------------------------------------------------------------------------------------------------------------------------------------------------------------------------------------------------------------------------------------------------------------------------------------------------------------------------------------------------------------------------------------------------------------------------------------------------------------------------------------------|
| 1      | <b>Provision against advances</b>                                                                                                                                                                                                                                                                                                                                                                                                                                                                                                                                                   |                                                                                                                                                                                                                                                                                                                                                                                                                                                                                                                                                                                                                                                                                                                                                                                                                                                                                                                                                                                                   |
|        | <p>Refer to note 11 and the accounting policies in notes 4.2 (b) and 6.5 to the consolidated financial statements.</p> <p>The Group's advances to the customers represent 28.96% of its total assets as at 31 December 2020 and are stated at Rs. 547.69 billion which is net of provision of Rs. 50.68 billion at the year end.</p> <p>The provision against advances was identified as a key audit matter in our audit as it involves a considerable degree of management judgment and compliance with the Prudential Regulations (PRs) issued by the State Bank of Pakistan.</p> | <p>Our audit procedures in respect of provision against loans and advances included the following:</p> <ul style="list-style-type: none"> <li>• Assessing the design and operating effectiveness of manual and automated controls over classification and provisioning of advances including: <ul style="list-style-type: none"> <li>- The accuracy of data input into the system used for disbursement and recovery of credit facilities;</li> <li>- Controls over correct classification of non-performing advances on time based criteria;</li> <li>- Controls over accurate computation and recording of provisions; and</li> <li>- Controls over the governance and approval process related to provision.</li> </ul> </li> <li>• Testing, on a sample basis, credit exposures identified by the management as displaying indicators of impairment, assessed the number of days overdue and assessed appropriateness of amount reported for provision in accordance with the PRs;</li> </ul> |

| S. No.   | Key Audit Matters                                                                                                                                                                                                                                                                                                                                                                                                                                                                                                                                                                                                                                                                                                                                                                                                                                                                                                                                                                     | How the matter was addressed in our audit                                                                                                                                                                                                                                                                                                                                                                                                                                                                                                                                                                                                                                                                                                                                                                        |
|----------|---------------------------------------------------------------------------------------------------------------------------------------------------------------------------------------------------------------------------------------------------------------------------------------------------------------------------------------------------------------------------------------------------------------------------------------------------------------------------------------------------------------------------------------------------------------------------------------------------------------------------------------------------------------------------------------------------------------------------------------------------------------------------------------------------------------------------------------------------------------------------------------------------------------------------------------------------------------------------------------|------------------------------------------------------------------------------------------------------------------------------------------------------------------------------------------------------------------------------------------------------------------------------------------------------------------------------------------------------------------------------------------------------------------------------------------------------------------------------------------------------------------------------------------------------------------------------------------------------------------------------------------------------------------------------------------------------------------------------------------------------------------------------------------------------------------|
|          |                                                                                                                                                                                                                                                                                                                                                                                                                                                                                                                                                                                                                                                                                                                                                                                                                                                                                                                                                                                       | <ul style="list-style-type: none"> <li>• Testing, on a sample basis, credit exposure where the management has not identified as displaying indicators of impairment challenged the management's assessment by reviewing the historical performances, account movement, financial ratios and reports on security maintained and formed our own view whether any impairment indicators are present;</li> <li>• For consumer advances, analyzed the days past due report for calculation of provision required in accordance with PRs; and</li> <li>• Checking, on a sample basis, accuracy of specific provision against non-performing advances and of general provision against consumer and SME advances by recomputing the provision made in accordance with the criteria prescribed under the PRs.</li> </ul> |
| <b>2</b> | <b>Valuation of Investments</b>                                                                                                                                                                                                                                                                                                                                                                                                                                                                                                                                                                                                                                                                                                                                                                                                                                                                                                                                                       |                                                                                                                                                                                                                                                                                                                                                                                                                                                                                                                                                                                                                                                                                                                                                                                                                  |
|          | <p>Refer to note 10 and the accounting policies in notes 4.2 (c) and 6.3 to the consolidated financial statements.</p> <p>As at December 31, 2020, the Group has investments classified as "Available-for-sale", "Held for trading" and "Held to maturity", amounting to Rs. 1,031.74 billion which in aggregate represent 54.55 % of the total assets of the Group.</p> <p>Investments are carried at cost or fair value in the accordance with the Group's accounting policy relating to their recognition. Provision against investments is based on impairment policy of the Group which includes both objective and subjective factors.</p> <p>We identified the valuation of investments including determination of impairment allowance on investments classified as 'Available-for-sale' and "Held to maturity" as a key audit matter because of their significance in relation to the total assets of the Group and judgment involved in assessing impairment allowance.</p> | <p>Our procedures in respect of valuation of investments included the following:</p> <ul style="list-style-type: none"> <li>• Assessing the design and tested the operating effectiveness of the relevant controls in place relating to valuation of investments;</li> <li>• Checking, on a sample basis, the valuation of investments to supporting documents, externally quoted market prices and break-up values; and</li> <li>• Evaluating the management's assessment of available for sale and held to maturity investments for any additional impairment in accordance with the Group's accounting policies and performed an independent assessment of the assumptions.</li> </ul>                                                                                                                        |

### **Information Other than the Consolidated Financial Statements and Auditor's Report Thereon**

Management is responsible for the other information. The other information comprises the information included in the Group's Annual Report but does not include the consolidated financial statements and our auditors' report thereon.

Our opinion on the consolidated financial statements does not cover the other information and we do not express any form of assurance conclusion thereon.

In connection with our audit of the consolidated financial statements, our responsibility is to read the other information and, in doing so, consider whether the other information is materially inconsistent with the consolidated financial statements or our knowledge obtained in the audit, or otherwise appears to be materially misstated. If, based on the work we have performed, we conclude that there is a material misstatement of this other information, we are required to report that fact. We have nothing to report in this regard.

### **Responsibilities of Management and the Board of Directors for the Consolidated Financial Statements**

Management is responsible for the preparation and fair presentation of the consolidated financial statements in accordance with accounting and reporting standards as applicable in Pakistan, and Companies Act, 2017 and for such internal control as management determines is necessary to enable the preparation of consolidated financial statements that are free from material misstatement, whether due to fraud or error.

In preparing the consolidated financial statements, management is responsible for assessing the Group's ability to continue as a going concern, disclosing, as applicable, matters related to going concern and using the going concern basis of accounting unless management either intends to liquidate the Group or to cease operations, or has no realistic alternative but to do so.

The Board of directors is responsible for overseeing the Group's financial reporting process.

### **Auditor's Responsibilities for the Audit of the Consolidated Financial Statements**

Our objectives are to obtain reasonable assurance about whether the consolidated financial statements as a whole are free from material misstatement, whether due to fraud or error, and to issue an auditor's report that includes our opinion. Reasonable assurance is a high level of assurance, but is not a guarantee that an audit conducted in accordance with ISAs as applicable in Pakistan will always detect a material misstatement when it exists. Misstatements can arise from fraud or error and are considered material if, individually or in the aggregate, they could reasonably be expected to influence the economic decisions of users taken on the basis of these consolidated financial statements.

As part of an audit in accordance with ISAs as applicable in Pakistan, we exercise professional judgment and maintain professional skepticism throughout the audit. We also:

- Identify and assess the risks of material misstatement of the consolidated financial statements, whether due to fraud or error, design and perform audit procedures responsive to those risks, and obtain audit evidence that is sufficient and appropriate to provide a basis for our opinion. The risk of not detecting a material misstatement resulting from fraud is higher than for one resulting from error, as fraud may involve collusion, forgery, intentional omissions, misrepresentations, or the override of internal control.
- Obtain an understanding of internal control relevant to the audit in order to design audit procedures that are appropriate in the circumstances, but not for the purpose of expressing an opinion on the effectiveness of the Group's internal control.
- Evaluate the appropriateness of accounting policies used and the reasonableness of accounting estimates and related disclosures made by management.
- Conclude on the appropriateness of management's use of the going concern basis of accounting and, based on the audit evidence obtained, whether a material uncertainty exists related to events or conditions that may cast significant doubt on the Group's ability to continue as a going concern. If we conclude that a material uncertainty exists, we are required to draw attention in our auditor's report to the related disclosures in the consolidated financial

statements or, if such disclosures are inadequate, to modify our opinion. Our conclusions are based on the audit evidence obtained up to the date of our auditor's report. However, future events or conditions may cause the Group to cease to continue as a going concern.

- Evaluate the overall presentation, structure and content of the consolidated financial statements, including the disclosures, and whether the consolidated financial statements represent the underlying transactions and events in a manner that achieves fair presentation.
- Obtain sufficient appropriate audit evidence regarding the financial information of the entities or business activities within the Group to express an opinion on the consolidated financial statements. We are responsible for the direction, supervision and performance of the group audit. We remain solely responsible for our audit opinion.

We communicate with the Board of Directors regarding, among other matters, the planned scope and timing of the audit and significant audit findings, including any significant deficiencies in internal control that we identify during our audit.

We also provide to the Board of Directors with a statement that we have complied with relevant ethical requirements regarding independence, and to communicate with them all relationships and other matters that may reasonably be thought to bear on our independence, and where applicable, related safeguards.

From the matters communicated with the Board of Directors, we determine those matters that were of most significance in the audit of the consolidated financial statements of the current year and are therefore the key audit matters. We describe these matters in our auditor's report unless law or regulation precludes public disclosure about the matter or when, in extremely rare circumstances, we determine that a matter should not be communicated in our report because the adverse consequences of doing so would reasonably be expected to outweigh the public interest benefits of such communication.

The engagement partner on the audit resulting in this independent auditor's report is M. Rehan Chughtai.

Lahore  
Date: February 26, 2021

  
KPMG Taseer Hadi & Co.  
Chartered Accountants

# Consolidated Statement of Financial Position

As at December 31, 2020

|                                                     | Note | 2020<br>(Rupees in '000) | 2019          |
|-----------------------------------------------------|------|--------------------------|---------------|
| <b>ASSETS</b>                                       |      |                          |               |
| Cash and balances with treasury banks               | 7    | 132,053,041              | 142,957,358   |
| Balances with other banks                           | 8    | 29,011,521               | 21,371,753    |
| Lendings to financial institutions                  | 9    | 17,968,243               | 6,060,869     |
| Investments                                         | 10   | 1,036,217,535            | 757,441,590   |
| Advances                                            | 11   | 547,685,708              | 548,472,860   |
| Fixed assets                                        | 12   | 63,679,312               | 64,201,807    |
| Intangible assets                                   | 13   | 1,867,244                | 1,978,975     |
| Deferred tax assets                                 |      | –                        | –             |
| Other assets                                        | 14   | 62,793,791               | 69,729,659    |
|                                                     |      | 1,891,276,395            | 1,612,214,871 |
| <b>LIABILITIES</b>                                  |      |                          |               |
| Bills payable                                       | 16   | 26,451,513               | 12,795,325    |
| Borrowings                                          | 17   | 184,577,340              | 92,859,968    |
| Deposits and other accounts                         | 18   | 1,388,737,961            | 1,226,593,025 |
| Liabilities against assets subject to finance lease |      | –                        | –             |
| Subordinated debt                                   |      | –                        | –             |
| Deferred tax liabilities                            | 19   | 7,491,040                | 6,214,223     |
| Other liabilities                                   | 20   | 91,027,158               | 102,405,513   |
|                                                     |      | 1,698,285,012            | 1,440,868,054 |
| <b>NET ASSETS</b>                                   |      | 192,991,383              | 171,346,817   |
| <b>REPRESENTED BY</b>                               |      |                          |               |
| Share capital                                       | 21   | 11,850,600               | 11,850,600    |
| Reserves                                            | 22   | 81,060,051               | 77,894,829    |
| Surplus on revaluation of assets                    | 23   | 28,803,351               | 24,752,206    |
| Unappropriated profit                               |      | 70,498,820               | 56,108,779    |
|                                                     |      | 192,212,822              | 170,606,414   |
| Non-controlling interest                            |      | 778,561                  | 740,403       |
|                                                     |      | 192,991,383              | 171,346,817   |
| <b>CONTINGENCIES AND COMMITMENTS</b>                |      |                          |               |
|                                                     | 24   |                          |               |

The annexed notes 1 to 48 and annexures I to II form an integral part of these consolidated financial statements.



**Imran Maqbool**  
President/Chief Executive



**Hammad Khalid**  
Chief Financial Officer



**S.M. Muneer**  
Director



**Mian Umer Mansha**  
Director



**Shahzad Hussain**  
Director

## Consolidated Profit and Loss Account

For the year ended December 31, 2020

|                                                               | Note | 2020<br>(Rupees in '000) | 2019        |
|---------------------------------------------------------------|------|--------------------------|-------------|
| Mark-up / return / interest earned                            | 26   | 145,772,451              | 148,088,700 |
| Mark-up / return / interest expensed                          | 27   | 69,929,012               | 84,370,609  |
| Net mark-up / interest income                                 |      | 75,843,439               | 63,718,091  |
| <b>NON MARK-UP / INTEREST INCOME</b>                          |      |                          |             |
| Fee and commission income                                     | 28   | 11,971,491               | 12,230,871  |
| Dividend income                                               |      | 969,322                  | 1,240,771   |
| Foreign exchange income                                       |      | 2,735,228                | 2,957,999   |
| Income from derivatives                                       |      | 4,087                    | 14,616      |
| Gain on securities                                            | 29   | 3,396,296                | 828,873     |
| Other income                                                  | 30   | 192,103                  | 244,551     |
| Total non-markup / interest Income                            |      | 19,268,527               | 17,517,681  |
| Total Income                                                  |      | 95,111,966               | 81,235,772  |
| <b>NON MARK-UP / INTEREST EXPENSES</b>                        |      |                          |             |
| Operating expenses                                            | 31   | 37,763,917               | 37,685,431  |
| Workers welfare fund                                          |      | 974,808                  | 802,046     |
| Other charges                                                 | 32   | 297,987                  | 260,743     |
| Total non-markup / interest expenses                          |      | 39,036,712               | 38,748,220  |
| Share of profit of associates                                 |      | 573,078                  | 339,633     |
| Profit before provisions                                      |      | 56,648,332               | 42,827,185  |
| Provisions / (reversals) and write offs - net                 | 33   | 7,330,044                | 2,673,592   |
| Extra ordinary / unusual items                                |      | -                        | -           |
| <b>PROFIT BEFORE TAXATION</b>                                 |      | 49,318,288               | 40,153,593  |
| Taxation                                                      | 34   | 19,756,019               | 16,206,382  |
| <b>PROFIT AFTER TAXATION</b>                                  |      | 29,562,269               | 23,947,211  |
| Profit attributable to non-controlling interest               |      | (152,042)                | (78,962)    |
| <b>PROFIT ATTRIBUTABLE TO EQUITY SHAREHOLDERS OF THE BANK</b> |      | 29,410,227               | 23,868,249  |
| <b>Rupees</b>                                                 |      |                          |             |
| <b>Basic and diluted earnings per share</b>                   | 35   | 24.82                    | 20.14       |

The annexed notes 1 to 48 and annexures I to II form an integral part of these consolidated financial statements.



Imran Maqbool  
President/Chief Executive



Hammad Khalid  
Chief Financial Officer



S.M. Muneer  
Director



Mian Umer Mansha  
Director

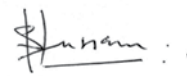

Shahzad Hussain  
Director

# Consolidated Statement of Comprehensive Income

For the year ended December 31, 2020

|                                                                                              | 2020             | 2019       |
|----------------------------------------------------------------------------------------------|------------------|------------|
|                                                                                              | (Rupees in '000) |            |
| <b>Profit after taxation for the year</b>                                                    | 29,562,269       | 23,947,211 |
| <b>Other comprehensive income</b>                                                            |                  |            |
| <b>Items that may be reclassified to profit and loss account in subsequent periods:</b>      |                  |            |
| Effect of translation of net investment in foreign branches and subsidiaries                 |                  |            |
| - Equity shareholders of the bank                                                            | 212,508          | 1,079,203  |
| - Non-controlling interest                                                                   | 7                | 20         |
|                                                                                              | 212,515          | 1,079,223  |
| Share of exchange translation reserve of associate                                           | 7,321            | 43,369     |
| Movement in surplus/ (deficit) on revaluation of investments - net of tax                    |                  |            |
| - Equity shareholders of the bank                                                            | 4,074,542        | 7,138,866  |
| Movement in surplus on associated undertaking - net of tax                                   | (24,823)         | 93,516     |
|                                                                                              | 4,049,719        | 7,232,382  |
|                                                                                              | 4,269,555        | 8,354,974  |
| <b>Items that will not be reclassified to profit and loss account in subsequent periods:</b> |                  |            |
| Remeasurement loss on defined benefit obligations - net of tax                               | (342,311)        | (474,421)  |
| Surplus on revaluation of operating fixed assets - net of tax                                | -                | 7,038,689  |
| Surplus on revaluation of non-banking assets - net of tax                                    | 119,544          | 165,776    |
|                                                                                              | (222,767)        | 6,730,044  |
| <b>Total comprehensive income</b>                                                            | 33,609,057       | 39,032,229 |
| <b>Attributable to:</b>                                                                      |                  |            |
| - Equity shareholders of the bank                                                            | 33,457,008       | 38,953,247 |
| - Non-controlling interest                                                                   | 152,049          | 78,982     |
|                                                                                              | 33,609,057       | 39,032,229 |

The annexed notes 1 to 48 and annexures I to II form an integral part of these consolidated financial statements.



**Imran Maqbool**  
President/Chief Executive



**Hammad Khalid**  
Chief Financial Officer



**S.M. Muneer**  
Director



**Mian Umer Mansha**  
Director



**Shahzad Hussain**  
Director



# Consolidated Statement of Changes in Equity

For the year ended December 31, 2020

|                                                                                                                                   | Share capital |                                   | Capital reserve              |                 | Statutory reserve | Revenue reserve |             | Surplus/(deficit) on revaluation of |            |              | Unappropriated profit | Total     | Non controlling interest | Grand total |
|-----------------------------------------------------------------------------------------------------------------------------------|---------------|-----------------------------------|------------------------------|-----------------|-------------------|-----------------|-------------|-------------------------------------|------------|--------------|-----------------------|-----------|--------------------------|-------------|
|                                                                                                                                   | Share premium | Non-distributable capital reserve | Exchange translation reserve | General reserve |                   | Investments     | Associate   | Fixed / non-banking assets          |            |              |                       |           |                          |             |
| Balance as at December 31, 2018                                                                                                   | 11,850,600    | 23,973,024                        | 908,317                      | 1,607,782       | 29,285,450        | 18,600,000      | (2,812,615) | 251,246                             | 12,979,244 | 53,971,079   | 150,614,127           | 708,752   | 151,322,879              |             |
| <b>Total comprehensive income for the year ended December 31, 2019</b>                                                            | -             | -                                 | -                            | -               | -                 | -               | -           | -                                   | -          | 23,888,249   | 23,888,249            | 78,962    | 23,947,211               |             |
| Profit after taxation for the year ended December 31, 2019                                                                        | -             | -                                 | -                            | 1,122,572       | -                 | -               | 7,138,866   | 93,516                              | 7,204,465  | (474,421)    | 15,084,998            | 20        | 15,085,018               |             |
| Other comprehensive income - net of tax                                                                                           | -             | -                                 | -                            | 1,122,572       | -                 | -               | 7,138,866   | 93,516                              | 7,204,465  | 23,393,828   | 38,953,247            | 78,962    | 39,032,229               |             |
| Transfer to statutory reserve                                                                                                     | -             | -                                 | -                            | -               | 2,397,684         | -               | -           | -                                   | -          | (2,397,684)  | -                     | -         | -                        |             |
| Transfer in respect of incremental depreciation from surplus on revaluation of fixed assets to unappropriated profit - net of tax | -             | -                                 | -                            | -               | -                 | -               | -           | -                                   | (54,093)   | 54,093       | -                     | -         | -                        |             |
| Surplus realized on disposal of revalued fixed assets - net of tax                                                                | -             | -                                 | -                            | -               | -                 | -               | -           | -                                   | (10,560)   | 10,560       | -                     | -         | -                        |             |
| Surplus realized on disposal of revalued non-banking assets - net of tax                                                          | -             | -                                 | -                            | -               | -                 | -               | -           | -                                   | (97,863)   | 37,863       | -                     | -         | -                        |             |
| <b>Transactions with owners, recorded directly in equity</b>                                                                      | -             | -                                 | -                            | -               | -                 | -               | -           | -                                   | -          | (4,740,240)  | (4,740,240)           | -         | (4,740,240)              |             |
| Final cash dividend at Rs. 4.0 per share - December 31, 2018                                                                      | -             | -                                 | -                            | -               | -                 | -               | -           | -                                   | -          | (4,740,240)  | (4,740,240)           | -         | (4,740,240)              |             |
| Interim cash dividend at Rs. 4.0 per share - March 31, 2019                                                                       | -             | -                                 | -                            | -               | -                 | -               | -           | -                                   | -          | (4,740,240)  | (4,740,240)           | -         | (4,740,240)              |             |
| Interim cash dividend at Rs. 4.0 per share - June 30, 2019                                                                        | -             | -                                 | -                            | -               | -                 | -               | -           | -                                   | -          | (4,740,240)  | (4,740,240)           | -         | (4,740,240)              |             |
| Interim cash dividend at Rs. 4.0 per share - September 30, 2019                                                                   | -             | -                                 | -                            | -               | -                 | -               | -           | -                                   | -          | (4,740,240)  | (4,740,240)           | -         | (4,740,240)              |             |
| Share of dividend attributable to Non-controlling interest                                                                        | -             | -                                 | -                            | -               | -                 | -               | -           | -                                   | -          | (18,960,960) | (18,960,960)          | (47,331)  | (18,960,960)             |             |
| Balance as at December 31, 2019                                                                                                   | 11,850,600    | 23,973,024                        | 908,317                      | 2,730,354       | 31,683,134        | 18,600,000      | 4,326,251   | 344,762                             | 20,081,193 | 56,108,779   | 170,606,414           | 740,403   | 171,346,817              |             |
| <b>Total comprehensive income for the year ended December 31, 2020</b>                                                            | -             | -                                 | -                            | -               | -                 | -               | -           | -                                   | -          | 29,410,227   | 29,410,227            | 152,042   | 29,562,269               |             |
| Profit after taxation for the year ended December 31, 2020                                                                        | -             | -                                 | -                            | 219,829         | -                 | -               | 4,074,542   | (24,823)                            | 119,544    | (342,311)    | 4,046,781             | 7         | 4,046,788                |             |
| Other comprehensive income - net of tax                                                                                           | -             | -                                 | -                            | 219,829         | -                 | -               | 4,074,542   | (24,823)                            | 119,544    | 29,067,916   | 33,457,008            | 152,049   | 33,609,057               |             |
| Transfer to statutory reserve                                                                                                     | -             | -                                 | -                            | -               | 2,945,393         | -               | -           | -                                   | -          | (2,945,393)  | -                     | -         | -                        |             |
| Transfer in respect of incremental depreciation from surplus on revaluation of fixed assets to unappropriated profit - net of tax | -             | -                                 | -                            | -               | -                 | -               | -           | -                                   | (90,800)   | 90,800       | -                     | -         | -                        |             |
| Surplus realized on disposal of revalued fixed assets - net of tax                                                                | -             | -                                 | -                            | -               | -                 | -               | -           | -                                   | (22,544)   | 22,544       | -                     | -         | -                        |             |
| Surplus realized on disposal of revalued non-banking assets - net of tax                                                          | -             | -                                 | -                            | -               | -                 | -               | -           | -                                   | (4,774)    | 4,774        | -                     | -         | -                        |             |
| <b>Transactions with owners, recorded directly in equity</b>                                                                      | -             | -                                 | -                            | -               | -                 | -               | -           | -                                   | -          | (5,925,300)  | (5,925,300)           | -         | (5,925,300)              |             |
| Final cash dividend at Rs. 5.0 per share - December 31, 2019                                                                      | -             | -                                 | -                            | -               | -                 | -               | -           | -                                   | -          | (5,925,300)  | (5,925,300)           | -         | (5,925,300)              |             |
| Interim cash dividend at Rs. 5.0 per share - March 31, 2020                                                                       | -             | -                                 | -                            | -               | -                 | -               | -           | -                                   | -          | (11,850,600) | (11,850,600)          | -         | (11,850,600)             |             |
| Share of dividend attributable to Non-controlling interest                                                                        | -             | -                                 | -                            | -               | -                 | -               | -           | -                                   | -          | -            | -                     | (113,891) | (113,891)                |             |
| Balance as at December 31, 2020                                                                                                   | 11,850,600    | 23,973,024                        | 908,317                      | 2,950,183       | 34,628,527        | 18,600,000      | 8,400,793   | 319,939                             | 20,082,619 | 70,498,820   | 192,212,822           | 778,561   | 192,991,383              |             |

For details of dividend declaration and appropriations, please refer note 46 to these consolidated financial statements.

For details of reserves, please refer note 22 to these consolidated financial statements.

The annexed notes 1 to 48 and annexures I to II form an integral part of these consolidated financial statements.

  
Imran Maqbool  
President/Chief Executive

  
Hamid Khalid  
Chief Financial Officer

  
S.M. Muneer  
Director

  
Mian Umer Mansha  
Director

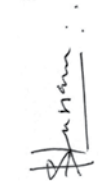  
Shahzad Hussain  
Director

# Consolidated Cash Flow Statement

For the year ended December 31, 2020

|                                                                              | Note | 2020<br>(Rupees in '000) | 2019          |
|------------------------------------------------------------------------------|------|--------------------------|---------------|
| <b>CASH FLOW FROM OPERATING ACTIVITIES</b>                                   |      |                          |               |
| Profit before taxation                                                       |      | 49,318,288               | 40,153,593    |
| Less: Dividend income and share of profit of associates                      |      | (1,542,400)              | (1,580,404)   |
|                                                                              |      | 47,775,888               | 38,573,189    |
| Adjustments:                                                                 |      |                          |               |
| Depreciation on fixed assets                                                 | 12.2 | 2,403,220                | 2,233,008     |
| Depreciation on right of use assets                                          | 31   | 1,697,826                | 1,610,893     |
| Impairment on fixed assets                                                   |      | 4,269                    | -             |
| Depreciation on non-banking assets acquired in satisfaction of claims        | 31   | 30,049                   | 45,456        |
| Amortization                                                                 | 13   | 469,860                  | 425,585       |
| Provisions / (reversals) and write offs - net                                | 33   | 7,330,044                | 2,673,592     |
| Workers welfare fund                                                         |      | 974,808                  | 802,046       |
| Gain on sale of non-banking assets acquired in satisfaction of claims        | 30   | (3,976)                  | (111,948)     |
| Gain on conversion of Ijarah agreements                                      | 30   | (63,290)                 | -             |
| Loss on termination of lease liability against right of use assets           | 30   | 15,637                   | -             |
| Charge / (reversal) for defined benefit plan                                 | 31.1 | 74,827                   | (101,509)     |
| Gain on sale of fixed assets                                                 | 30   | (73,164)                 | (63,176)      |
| Unrealized loss on revaluation of investments classified as held for trading | 29   | (110,269)                | (83,986)      |
| Interest expensed on lease liability against right-of-use assets             | 27   | 1,495,614                | 1,506,301     |
|                                                                              |      | 14,245,455               | 8,936,262     |
|                                                                              |      | 62,021,343               | 47,509,451    |
| <b>Decrease / (increase) in operating assets</b>                             |      |                          |               |
| Lendings to financial institutions                                           |      | (11,907,374)             | 33,089,021    |
| Held-for-trading securities                                                  |      | 8,244,331                | (148,713)     |
| Advances                                                                     |      | (6,724,193)              | 18,629,092    |
| Others assets (excluding advance taxation)                                   |      | 9,319,674                | (17,511,282)  |
|                                                                              |      | (1,067,562)              | 34,058,118    |
| <b>(Decrease) / increase in operating liabilities</b>                        |      |                          |               |
| Bills Payable                                                                |      | 13,656,188               | (4,207,947)   |
| Borrowings from financial institutions                                       |      | 92,691,055               | (129,752,644) |
| Deposits                                                                     |      | 162,144,936              | 104,286,490   |
| Other liabilities (excluding current taxation)                               |      | (18,845,300)             | 14,307,719    |
|                                                                              |      | 249,646,879              | (15,366,382)  |
| Defined benefits paid                                                        |      | (302,940)                | (309,074)     |
| Income tax paid                                                              |      | (16,309,576)             | (2,506,095)   |
| Net cash flow from operating activities                                      |      | 293,988,144              | 63,386,018    |
| <b>CASH FLOW FROM INVESTING ACTIVITIES</b>                                   |      |                          |               |
| Net investments in available-for-sale securities                             |      | (297,967,382)            | 6,412,423     |
| Net investments in held-to-maturity securities                               |      | 17,593,419               | (1,001,069)   |
| Dividends received                                                           |      | 1,161,822                | 1,433,411     |
| Investments in fixed assets                                                  |      | (3,051,399)              | (4,817,498)   |
| Investments in Intangible assets                                             |      | (358,181)                | (949,464)     |
| Proceeds from sale of fixed assets                                           |      | 191,342                  | 167,374       |
| Proceeds from sale of non-banking assets acquired in satisfaction of claims  |      | 39,000                   | 540,000       |
| Investments in non-banking assets acquired in satisfaction of claims         |      | -                        | (64,445)      |
| Proceeds from divestment in a subsidiary                                     |      | 99,694                   | -             |
| Effect of translation of net investment in foreign branches & subsidiaries   |      | 212,515                  | 1,079,223     |
| Net cash flow (used in) / generated from investing activities                |      | (282,079,170)            | 2,799,955     |
| <b>CASH FLOW FROM FINANCING ACTIVITIES</b>                                   |      |                          |               |
| Payments of subordinated debt                                                |      | -                        | (3,891,019)   |
| Dividend paid                                                                |      | (11,872,206)             | (18,877,984)  |
| Payment of lease liability against right-of-use-assets                       |      | (2,327,634)              | (1,987,479)   |
| <b>Net cash flow used in financing activities</b>                            |      | (14,199,840)             | (24,756,482)  |
| Effects of exchange rate changes on cash and cash equivalents                |      | 1,595,436                | 3,553,077     |
| <b>Increase in cash and cash equivalents</b>                                 |      | (695,430)                | 44,982,568    |
| Cash and cash equivalents at beginning of the year                           |      | 161,391,072              | 118,003,940   |
| <b>Cash and cash equivalents at end of the year</b>                          | 36   | 160,695,642              | 162,986,508   |

The annexed notes 1 to 48 and annexures I to II form an integral part of these consolidated financial statements.



**Imran Maqbool**  
President/Chief Executive



**Hammad Khalid**  
Chief Financial Officer



**S.M. Muneer**  
Director



**Mian Umer Mansha**  
Director



**Shahzad Hussain**  
Director

# Notes To The Consolidated Financial Statements

For the year ended December 31, 2020

## 1. STATUS AND NATURE OF BUSINESS

The “Group” consists of

### Holding company

MCB Bank Limited (the ‘Bank’) is a banking company incorporated in Pakistan and is engaged in commercial banking and related services. The Bank’s ordinary shares are listed on the Pakistan stock exchange. The Bank’s Registered Office and Principal Office are situated at MCB -15 Main Gulberg, Lahore. The Bank operates 1,418 branches (2019: 1,399 branches) within Pakistan and 11 branches (2019: 11 branches) outside Pakistan (including the Karachi Export Processing Zone branch).

### 1.1 Subsidiary companies

#### MCB - Arif Habib Savings and Investments Limited

MCB - Arif Habib Savings and Investments Limited was incorporated on August 30, 2000, as an unquoted public limited company. During 2008, the company was listed on the Pakistan Stock Exchange by way of offer for sale of shares by a few of the existing shareholders of the company to the general public. The registered office of the company is situated at 2nd Floor, Adamjee House, I.I Chundrigar Road, Karachi, Pakistan.

The company is registered as an Asset Management Company and Investment Advisor under the Non-Banking Finance Companies (Establishment and Regulation) Rules, 2003 and Pension Fund Manager under Voluntary Pension System Rules 2005. The company also manages discretionary portfolio accounts. The Bank owns 51.33% shares of the company.

#### MCB Non-Bank Credit Organization Closed Joint Stock Company

MCB Non-banking Credit Organization Closed Joint Stock Company was incorporated on 16 October 2009 and domiciled in the Republic of Azerbaijan. The company is a closed joint stock company limited by shares and was set up in accordance with Azerbaijani regulations. The registered office of the company is located at 49B Tbilisi Ave. Baku AZ1065, Republic of Azerbaijan. The Bank owns 99.94% shares of the company.

The Company’s principal business activity is provision of finance leases within the Republic of Azerbaijan. The company leases out various types of industrial equipment, equipment used in medicine, health care, and for other business needs. In addition, the company leases out cars and trucks. Further the company is also involved in real estate finance leases.

#### MCB Islamic Bank Limited

MCB Islamic Bank Limited (MCBIBL) was incorporated in Pakistan as an unlisted public limited company on May 15, 2014 to carry out the business of an Islamic commercial Bank in accordance and in conformity with the principles of Islamic Shari’ah and in accordance with regulations and guidelines of the State Bank of Pakistan. The Securities and Exchange Commission of Pakistan granted “Certificate of Commencement of Business” to MCBIBL on January 30, 2015. MCBIBL is a wholly owned subsidiary of MCB Bank Limited (MCB).

The State Bank of Pakistan (SBP) granted a “Certificate of Commencement of Banking Business” to MCBIBL on September 14, 2015 under Section 27 of the Banking Companies Ordinance, 1962. MCBIBL formally commenced operations as a Scheduled Islamic Commercial Bank with effect from October 15, 2015 upon receiving notification in this regard from SBP under section 37 of the State Bank of Pakistan Act, 1956. Currently, the Bank is engaged in corporate, commercial, consumer, micro finance, investment and retail banking activities.

MCBIBL is operating through 187 branches in Pakistan (December 31, 2019: 185 branches). The Registered Office of MCBIBL is situated at 59 Block T, Phase II, DHA, Lahore Cantt and Principal Office is situated at 339 Block Z, Phase III, DHA Lahore Cantt.

# Notes To The Consolidated Financial Statements

For the year ended December 31, 2020

## Financial & Management Services (Private) Limited

Financial & Management Services (Private) Limited is fully provided subsidiary and the company is dormant and has no asset and liability. The Board of Directors of the Bank has approved winding up of the Company. The Bank holds 95.90% shareholding in this subsidiary.

## MCB Financial Services Limited

During the year, the Group disposed off its ownership stake in MCB Financial Services Limited, a wholly owned subsidiary, with effect from October 31, 2020.

## 2. BASIS OF PRESENTATION

- 2.1** These consolidated financial statements include the financial statements of MCB Bank Limited and its subsidiary companies and share of the profit / reserves of associates (the "Group").
- 2.2** In accordance with the directives of the Federal Government regarding the shifting of the banking system to Islamic modes, the State Bank of Pakistan has issued various circulars from time to time. Permissible forms of trade-related modes of financing include purchase of goods by banks from their customers and immediate resale to them at appropriate profit in price on deferred payment basis. The purchases and sales arising under these arrangements are not reflected in these consolidated financial statements as such but are restricted to the amount of facility actually utilized and the appropriate portion of profit thereon. The Islamic Banking operations of the Group have complied with the requirements set out under the Islamic Financial Accounting Standards issued by the Institute of Chartered Accountants of Pakistan and notified under the provisions of the Companies Act, 2017.
- 2.3** Key financial figures of the MCBIBL are disclosed in Annexure II to these consolidated financial statements.
- 2.4** The consolidated financial statements are presented in Pak Rupees, which is the Group's functional and presentation currency. The amounts are rounded off to the nearest thousand.

## 3. STATEMENT OF COMPLIANCE

- 3.1** These consolidated financial statements have been prepared in accordance with accounting and reporting standards as applicable in Pakistan. The accounting and reporting standards comprise of:
- International Financial Reporting Standards IFRS issued by the International Accounting Standards Board (IASB) as are notified under the Companies Act, 2017;
  - Islamic Financial Accounting Standards (IFAS) issued by the Institute of Chartered Accountants of Pakistan as are notified under the Companies Act, 2017;
  - Provisions of and directives issued under the Banking Companies Ordinance, 1962, the Companies Act, 2017; and
  - Directives issued by the SBP and the Securities and Exchange Commission of Pakistan (SECP).

Wherever the requirements of the Banking Companies Ordinance, 1962, Companies Act, 2017 or the directives issued by the SBP and the SECP differ with the requirements of IFRS or IFAS, requirements of the Banking Companies Ordinance, 1962, the Companies Act, 2017 and the said directives shall prevail.

The State Bank of Pakistan has deferred the applicability of International Financial Reporting Standard 9, 'Financial Instruments' through BPRD Circular No. 04 of 2019 dated October 23, 2019 and International Accounting Standards 40, 'Investment Property' for Banking Companies through BSD Circular No. 10 dated August 26, 2002. The Securities and Exchange Commission of Pakistan (SECP) has deferred applicability of IFRS-7 "Financial Instruments: Disclosures" on banks through S.R.O 411(1) /2008 dated April 28, 2008. Accordingly, the requirements of these standards have not been considered in the preparation of these consolidated financial statements. However, investments have been classified and valued in accordance with the requirements prescribed by the State Bank of Pakistan through various circulars.

# Notes To The Consolidated Financial Statements

For the year ended December 31, 2020

IFRS10 Consolidated Financial Statements was made applicable from period beginning on or after January 01, 2015 vide S.R.O 633(I)/2014 dated July 10, 2014 by SECP. However, SECP has directed through S.R.O 56(I) /2016 dated January 28, 2016, that the requirements of consolidation under section 237 of the repealed Companies Ordinance 1984 (Section 228 of Companies Act 2017) and IFRS-10 "Consolidated Financial Statements" is not applicable in case of investment by companies in mutual funds established under Trust structure. Accordingly, the requirements of these standards have not been considered in the preparation of these consolidated financial statements.

The State Bank of Pakistan has deferred the applicability of IFAS 3 'Profit and Loss Sharing on Deposits', through BPRD Circular No.04 dated February 25, 2015.

## 3.2 Standards, interpretations and amendments to published approved accounting standards that are effective in the current year

There are certain new standards and interpretations of and amendments to existing accounting standards that have become applicable to the Group for accounting periods beginning on or after January 1, 2020. These are considered either to not be relevant or not to have any significant impact on the Group's consolidated financial statements.

## 3.3 Standards, interpretations and amendments to published approved accounting standards that are not yet effective

The following other standards, amendments and interpretations of approved accounting standards are effective for accounting periods beginning on or after January 1, 2021:

|                                                                               | <b>Effective date (annual periods beginning on or after)</b> |
|-------------------------------------------------------------------------------|--------------------------------------------------------------|
| IAS 1, Presentation of Financial Statements (Amendments)                      | January 1, 2022                                              |
| IAS 16, Property, plant and equipment (Amendments)                            | January 1, 2022                                              |
| IAS 37, Provisions, Contingent Liabilities and Contingent Assets (Amendments) | January 1, 2022                                              |

The SECP, through SRO 229(I)/2019 dated February 14, 2019, has notified that IFRS 9, Financial Instruments, is applicable for accounting periods ending on or after June 30, 2019. However, as per BPRD Circular No. 04 of 2019 dated October 23, 2019 of SBP, effective date of IFRS 9 implementation is January 01, 2021. The requirements of this standard have been incorporated in these consolidated financial statements for the jurisdictions/entities where IFRS 9 has been adopted.

IFRS 9, Financial Instruments: Classification and Measurement, addresses recognition, classification, measurement and derecognition of financial assets and financial liabilities. The standard has also introduced a new impairment model for financial assets which requires recognition of impairment charge based on an 'expected credit losses' (ECL) approach rather than the 'incurred credit losses' approach as currently followed. The ECL approach has an impact on all assets of the Group which are exposed to credit risk. The impact of the application of IFRS 9 in Pakistan on the Group's financial statements is being assessed and SBP's implementation guidelines are awaited.

There are other new and amended standards and interpretations that are mandatory for the Group accounting periods beginning on or after January 1, 2021 but are considered not to be relevant or do not have any significant effect on the Group's operations and are therefore not detailed in these consolidated financial statements.

## 4. BASIS OF MEASUREMENT

- 4.1 These consolidated financial statements have been prepared under the historical cost convention except that certain classes of fixed assets and non-banking assets acquired in satisfaction of claims are stated at revalued amounts and certain investments and derivative financial instruments have been marked to market and are carried at fair value. In addition, obligations in respect of staff retirement benefits are carried at present value.

# Notes To The Consolidated Financial Statements

For the year ended December 31, 2020

## 4.2 Critical accounting estimates and judgments

The preparation of consolidated financial statements in conformity with the approved accounting standards requires the use of certain critical accounting estimates. It also requires the management to exercise its judgment in the process of applying the Group accounting policies. Estimates and judgments are continually evaluated and are based on historical experiences, including expectations of future events that are believed to be reasonable under the circumstances. Revisions to accounting estimates are recognized in the period in which the estimates are revised if the revision affects only that period, or in the period of revision and future periods if the revision affects both current and future periods. The areas where various assumptions and estimates are significant to the Group consolidated financial statements or where judgment was exercised in the application of accounting policies are as follows:

### a) Classification of investments

In classifying investments, the Group follows the guidance provided in SBP circulars:

- Investments classified as ‘held for trading’, are securities which are acquired with an intention to trade by taking advantage of short term market / interest rate movements and are to be sold within 90 days of acquisition.
- Investments classified as ‘held to maturity’ are non-derivative financial assets with fixed or determinable payments and fixed maturity. In making this judgment, the Group evaluates its intention and ability to hold such investment to maturity.
- The investments other than those in associates which are not classified as ‘held for trading’ or ‘held to maturity’ are classified as ‘available for sale’.

### b) Provision against advances

The Group reviews its loan portfolio including Islamic financing and related assets to assess the amount of non-performing advances and provision required on regular basis. While assessing this requirement various factors including the delinquency in the account, financial position of the borrowers and the requirements of the Prudential Regulations are considered.

The amount of general provision is determined in accordance with the relevant regulations and management’s judgment as explained in note 11.4.4.

### c) Impairment of ‘available for sale’ equity investments

The Group determines that ‘available for sale’ equity investments are impaired when there has been a significant or prolonged decline in the fair value below its cost. The determination of what is significant or prolonged requires judgment. In making this judgment, the Group evaluates among other factors, the normal volatility in share price. In addition, the impairment may be appropriate when there is an evidence of deterioration in the financial health of the investee and sector performance, changes in technology and operational/financial cash flows.

### d) Taxation

In making the estimates for income taxes currently payable by the Group, the management considers the current income tax laws and the decisions of appellate authorities on certain issues in the past.

### e) Fair value of derivatives

The fair values of derivatives which are not quoted in active markets are determined by using valuation techniques. The valuation techniques take into account the relevant underlying parameters including foreign currency involved, interest rates, yield curves, volatilities, contracts duration etc.

### f) Depreciation, amortization and revaluation of operating fixed assets

The Group’s management reviews the useful lives and residual values of assets annually by considering expected pattern of economic benefit that the management expects to drive from the

# Notes To The Consolidated Financial Statements

For the year ended December 31, 2020

item and the maximum period up to which such benefits are expected to be available. Any change in estimates in future years might affect the carrying amounts of the respective items of assets with a corresponding effect on the depreciation charge and impairment. Such change is accounted for as change in accounting estimates in accordance with International Accounting Standard (IAS) 8 "Accounting Policies, Changes in Accounting Estimates and Errors". Further, the Group estimates the revalued amount of land and buildings on a regular basis. The estimates are based on valuations carried out by independent professional valuers under the market conditions.

## g) Staff retirement benefits

Certain actuarial assumptions have been adopted as disclosed in note 38 of these consolidated financial statements for the actuarial valuation of staff retirement benefit plans. Actuarial assumptions are entity's best estimates of the variables that will determine the ultimate cost of providing post employment benefits. Changes in these assumptions in future years may affect the liability / asset under these plans in those years.

## h) Lease term

The Group applies judgement to determine the lease term for some lease contracts in which it is a lessee that include renewal options. The assessment of whether the Group is reasonably certain to exercise such options impacts the lease term, which significantly affects the amount of lease liabilities and right-of-use assets recognized.

## 5. FINANCIAL RISK MANAGEMENT

These risk management policies continue to remain robust and the Group is reviewing its portfolio regularly and conducts rapid portfolio reviews in line with emerging risks.

### Impact of COVID-19 on the Financial Statements

The COVID - 19 pandemic has taken a toll on all economies and emerged as a contagion risk around the globe, including Pakistan. To reduce the impact on businesses and economies in general, regulators / governments across the globe have introduced a host of measures on both the fiscal and economic fronts.

The State Bank of Pakistan (SBP) has also responded to the crisis by cutting the Policy Rate by 625 basis points during the period to 7% by June 2020. Other regulatory measures to provide an impetus to economic activity include the following:

- Reduction in the capital conservation buffer by 100 basis points to 1.5%;
- Increasing the regulatory limit on extension of credit to SMEs to Rs 180 million;
- Relaxing the debt burden ratio for consumer loans from 50% to 60%;
- Allowing banks to defer borrowers' principal loan payments by one year and or restructure / reschedule loans for borrowers who require relief of principal repayment exceeding one year and / or mark-up with no reflection on credit history; and
- Introduction of refinancing schemes for payment of wages and salaries.

COVID 19 has impacted the banks in Pakistan from various facets which include muted credit risk increase, reduced fee income due to slowdown in economic activity, branch closures and cyber security threat management.

The potential impact of the economic stress posed by the COVID-19 outbreak is difficult to predict, as many of Group's borrowers have availed the SBP enabled deferment/restructuring & rescheduling relief. Hence, the management has exercised prudence and booked General Provision of Rs. 4.0 billion during the year ended December 31, 2020.

Detailed disclosure on financial risk management has been reported in note 45 to these consolidated financial statements.

# Notes To The Consolidated Financial Statements

For the year ended December 31, 2020

## 6. SUMMARY OF SIGNIFICANT ACCOUNTING POLICIES

The accounting policies adopted in the preparation of these consolidated financial statements are consistent with those of the previous financial year:

### 6.1 Basis of consolidation

- a) These consolidated financial statements include the financial statements of MCB Bank Limited and its subsidiary companies and share of the profit / reserves of associates are accounted for under the equity basis of accounting.
- b) Subsidiaries are all entities over which the Group has the power to govern the financial and operating policies accompanying a shareholding of more than one half of the voting rights. The existence and effect of potential voting rights that are currently exercisable are considered when assessing whether the Group controls another entity. Subsidiaries are fully consolidated from the date on which control is transferred to the Group. They are de-consolidated from the date when control ceases / the subsidiaries are disposed off. The assets and liabilities of subsidiary companies have been consolidated on a line by line basis based on the financial statements as at December 31, 2020 and the carrying value of investments held by the Bank is eliminated against the subsidiaries' shareholders' equity in these consolidated financial statement. Material intra-group balances and transactions have been eliminated.
- c) Associates are all entities over which the Group has significant influence but not control or joint control. Investments in associates are accounted for by the equity method of accounting and are initially recognised at cost, thereafter for the post-acquisition change in the Group's share of net assets of the associate, the cumulative post-acquisition movements are adjusted in the carrying amount of the investment. Accounting policies of the associates have been changed where necessary to ensure consistency with the policies adopted by the Group.
- d) Non-controlling interest is that part of the net results of operations and of net assets of subsidiary companies attributable to interests which are not owned by the Group.

### 6.2 IFRS 16 - Lease Liability & Right of Use Assets

The lease liability is initially measured at the present value of lease payments to be made over the term of the lease, discounted using the Group's incremental borrowing rate. The lease liability is subsequently measured at amortized cost using the effective interest rate method. The carrying amount is remeasured/adjusted if there are changes in the future cash flows or the lease term.

The right-of-use asset is initially measured at cost, which comprises the initial amount of the lease liability, adjusted for, as applicable, any lease payments made at or before the commencement date. On subsequent measurement, right-of-use assets are stated at cost less any accumulated depreciation / accumulated impairment losses and are adjusted for any remeasurement of the lease liability.

Right-of-use assets are depreciated on a straight line basis over the lease term as this method closely reflects the expected pattern of consumption of future economic benefits. Carrying amount of the lease liability is derecognised upon termination of the lease contract with corresponding adjustment to right-of-use asset. Gain or loss on termination of lease contract is recognised in the profit and loss account.

The Group has elected not to recognize a right-of-use asset and the corresponding lease liability for short-term leases with terms of 12 months or less and leases of low-value assets. Payments associated with these leases are recognized as an expense in the consolidated profit or loss account on a straight-line basis .



# Notes To The Consolidated Financial Statements

For the year ended December 31, 2020

## 6.3 Investments

The Group classifies its investments as follows:

### a) Held for trading

These are securities, which are either acquired for generating profit from short-term fluctuations in market prices, interest rate movements, dealers margin or are securities included in a portfolio in which a pattern of short-term profit taking exists.

### b) Held to maturity

These are securities with fixed or determinable payments and fixed maturity in respect of which the Group has the positive intent and ability to hold to maturity.

### c) Available for sale

These are investments, other than those in subsidiaries and associates, that do not fall under the 'held for trading' or 'held to maturity' categories.

Investments are initially recognized at cost which in case of investments other than 'held for trading' include transaction costs associated with the investment. Transaction costs on investments held for trading are expensed in the profit and loss account.

All purchases and sales of investments that require delivery within the time frame established by regulation or market convention are recognized at the trade date. Trade date is the date on which the Group commits to purchase or sell the investment.

In accordance with the requirements of the State Bank of Pakistan, quoted securities, other than those classified as 'held to maturity' and investments in associates are subsequently re-measured to market value. Surplus / deficit arising on revaluation of quoted securities which are classified as 'available for sale', is taken to surplus / deficit on revaluation of investments through statement of comprehensive income in equity till disposal at which time it is recorded in profit and loss account. Surplus / deficit arising on revaluation of quoted securities which are classified as 'held for trading', is taken to the profit and loss account, currently.

Unquoted equity securities (excluding investments in associates) are valued at the lower of cost and break-up value. Break-up value of equity securities is calculated with reference to the net assets of the investee company as per the latest available financial statements. Investments classified as 'held to maturity' are carried at amortized cost less accumulated impairment losses, if any.

Provision for impairment in the values of securities (except debentures, participation term certificates and term finance certificates) is made currently. Impairment of 'available for sale' equity investments is discussed in 4.2(c). Provisions for impairment in value of debentures, participation term certificates and term finance certificates are made as per the requirements of the Prudential Regulations issued by the State Bank of Pakistan.

Impairment against investment in associates is assessed as per the requirements of IAS 36.

## 6.4 Sale and repurchase agreements

Securities sold subject to a repurchase agreement (repo) are retained in these consolidated financial statements as investments and the counter party liability is included in borrowings. Securities purchased under an agreement to resell (reverse repo) are not recognized in these consolidated financial statements as investments and the amount extended to the counter party is included in lendings to financial institutions. The difference between the purchase / sale and re-sale / re-purchase price is recognized as mark-up income / expense on a time proportion basis, as the case may be.

## 6.5 Advances

Advances are stated net of specific and general provisions. Specific provision is determined on the

# Notes To The Consolidated Financial Statements

For the year ended December 31, 2020

basis of the Prudential Regulations and other directives issued by the State Bank of Pakistan (SBP) and charged to the profit and loss account. Provisions are held against identified as well as unidentified losses. Provisions against unidentified losses include general provision against Consumer and Small Enterprise (SEs) loans made in accordance with the requirements of the Prudential Regulations issued by SBP and provision based on historical loss experience on advances. General provisions pertaining to overseas advances are made in accordance with the requirements of the regulatory authorities of the respective countries. Advances are written off when there is no realistic prospect of recovery.

Leases where the Group transfers substantially all the risks and rewards incidental to ownership of an asset to the lessee are classified as finance leases. A receivable is recognized at an amount equal to the present value of the lease payments including any guaranteed residual value. Finance lease receivables are included in advances to the customers.

In Murabaha transactions, the Group purchases the goods through its agent or client and after taking the possession, sells them to the customer on cost plus profit basis either in a spot or credit transaction. Under Murabaha financing, funds disbursed for purchase of goods are recorded as 'Advance against Murabaha finance'. On culmination of Murabaha i.e. sale of goods to customers, Murabaha financing are recorded at the deferred sale price. Goods purchased but remaining unsold at the statement of financial position date are recorded as inventories.

The Group values its inventories at the lower of cost and net realizable value. The net realizable value is the estimated selling price in the ordinary course of business less the estimated cost necessary to make the sale. Cost of inventories represents actual purchases made by the Group / customers as the agent of the Group for subsequent sale.

In Ijarah financing, the Group provides the asset on pre-agreed rentals for specific tenors to the customers. Ijarah assets are stated at cost less depreciation and are disclosed as part of 'Islamic financing and related assets'. The rental on Ijarah under Islamic Financial Accounting Standard - 2 Ijarah (IFAS 2) are recorded as income / revenue. The Group charges depreciation from the date of recognition of Ijarah of respective assets to Mustajir. Ijarah assets are depreciated over the period of Ijarah using the straight line method. Impairment of Ijarah assets is determined in accordance with the Prudential Regulations issued by the SBP.

In Diminishing Musharaka based financing, the Group enters into Musharaka based on Shirkat-ul-Milk for financing and agreed share of fixed assets (example: house, land, plant, machinery or vehicle) with its customers and enters into period profit payment agreement for the utilization of the Group's Musharaka share by the customer.

In Istisna financing, the Group acquires the described goods to be manufactured by the customer from raw material of its own and deliver to the Group within an agreed time. The goods are then sold and the amount financed is received back by the Group alongwith profit.

In Salam financing, the Group pays full in advance to its customer for buying specified goods / commodities to be delivered to the Group within an agreed time. The goods are then sold and the amount financed is received back by the Group alongwith profit.

In Running Musharaka based financing, the Group enters into financing with the customer based on Shirkat-ul-Aqd or Business Partnership in the customer's operating business where the funds can be withdrawn or refunded during the Musharakah period.

## 6.6 Fixed assets and depreciation

Fixed assets other than land and buildings are stated at cost less accumulated depreciation and accumulated impairment losses, if any. Buildings are carried at revalued amount less any accumulated depreciation and subsequent impairment losses, if any. Land is carried at revalued amount less any subsequent impairment losses, if any. Cost of property and equipment of foreign operations includes exchange differences arising on currency translation at year-end rates.

# Notes To The Consolidated Financial Statements

For the year ended December 31, 2020

Capital work-in-progress is stated at cost less accumulated impairment losses, if any. These are transferred to specific assets as and when assets become available for use.

Depreciation on all fixed assets (excluding land) is charged using the straight line method in accordance with the rates specified in note 12.2 to these consolidated financial statements and after taking into account residual value, if any. The residual values, useful lives and depreciation methods are reviewed and adjusted, if appropriate, at each balance sheet date.

Depreciation on additions is charged from the month the assets are available for use while no depreciation is charged in the month in which the assets are disposed off.

Land and buildings are revalued by independent, professionally qualified valuers with sufficient regularity to ensure that their net carrying amount does not differ materially from their fair value. An increase arising on revaluation is credited to the surplus on revaluation of fixed assets account. A decrease arising on revaluation of fixed assets is adjusted against the surplus of that asset or, if no surplus exists, is charged to the profit and loss account as an impairment of the asset. A surplus arising subsequently on an impaired asset is reversed through the consolidated profit and loss account up to the extent of the original impairment.

Surplus on revaluation of fixed assets (net of associated deferred tax) to the extent of the incremental depreciation charged on the related assets is transferred to unappropriated profit.

Gains / losses on sale of property and equipment are credited / charged to the consolidated profit and loss account currently, except that the related surplus on revaluation of land and buildings (net of deferred taxation) is transferred directly to unappropriated profit.

Subsequent costs are included in the asset's carrying amount or are recognized as a separate asset, as appropriate, only when it is probable that future economic benefits associated with the item will flow to the Group and the cost of the item can be measured reliably. All other repairs and maintenance are charged to the consolidated profit and loss account.

## 6.6.1 Intangible assets

Intangible assets are stated at cost less accumulated amortization and accumulated impairment losses, if any. Intangible assets are amortized from the month when these assets are available for use, using the straight line method, whereby the cost of the intangible assets are amortized over its estimated useful lives over which economic benefits are expected to flow to the Group. The useful lives are reviewed and adjusted, if appropriate, at each balance sheet date.

## 6.7 Impairment

The carrying amount of assets are reviewed at each balance sheet date for impairment whenever events or changes in circumstances indicate that the carrying amounts of the assets may not be recoverable. If such indication exists and where the carrying value exceeds the estimated recoverable amount, assets are written down to their recoverable amounts. The resulting impairment loss is taken to the consolidated profit and loss account except for impairment loss on revalued assets, which is adjusted against the related revaluation surplus to the extent that the impairment loss does not exceed the surplus on revaluation of that asset.

## 6.8 Staff retirement benefits

MCB Bank Limited (Holding Company)

The Bank operates the following staff retirement benefits for its employees:

- a) For clerical / non-clerical staff who did not opt for the new scheme, the Bank operates the following:

## Notes To The Consolidated Financial Statements

For the year ended December 31, 2020

- an approved contributory provident fund;
  - an approved gratuity scheme; and
  - a contributory benevolent scheme
- b) For clerical / non-clerical staff who joined the Bank after the introduction of the new scheme and for others who opted for the new scheme introduced in 1975, the Bank operates the following:
- an approved non-contributory provident fund introduced in lieu of the contributory provident fund;
  - an approved pension fund; and
  - contributory benevolent scheme
- c) For officers who joined the Bank after the introduction of the new scheme and for others who opted for the new scheme introduced in 1977, the Bank operates the following:
- an approved non-contributory provident fund introduced in lieu of the contributory provident fund;
  - an approved pension fund, and
  - contributory benevolent fund.

However, the management has replaced the pension benefits for employees in the officer category with a contributory provident fund for services rendered after December 31, 2003.

- d) For executives and officers who joined the Bank on or after January 01, 2000, the Bank operates an approved contributory provident fund.
- e) Post retirement medical benefits to entitled employees.

Annual contributions towards the defined benefit plans and schemes are made on the basis of actuarial advice using the Projected Unit Credit Method. The above benefits are payable to staff at the time of separation from the Bank's services subject to the completion of qualifying period of service. Actuarial gains / losses arising from experience adjustments and changes in actuarial assumptions are recognized in other Comprehensive Income in the period of occurrence.

Past service cost is the change in the present value of the defined benefit obligation resulting from a plan amendment or curtailment. The Bank recognizes past service cost as an expense at the earlier of the following dates:

- (i) when the plan amendment or curtailment occurs; and
- (ii) when the Bank recognizes related restructuring costs or termination benefits.

### Employees' compensated absences

Liability in respect of employees' compensated absences is accounted for in the year in which these are earned on the basis of actuarial valuation carried out using the Projected Unit Credit Method. Actuarial gains / losses arising from experience adjustments and changes in actuarial assumptions are recognized in consolidated profit and loss account in the period of occurrence.

### MCB Islamic Bank Limited

MCBIBL operates a recognised contributory provident fund scheme for all its permanent employees. Equal monthly contributions are made both by the Bank and its permanent employees, to the Fund at the rate of 8.33% of the basic salaries of employees. However, an employee has an option to increase his/her contribution upto 15% but the Bank will still contribute 8.33% of the employee's basic salary. The Bank has no further payment obligation once the contributions have been paid. The contributions are recognised as employee benefit expense when they are due.

# Notes To The Consolidated Financial Statements

For the year ended December 31, 2020

## 6.9 Taxation

### Current

Provision for current taxation is based on taxable income at the current rates of taxation after taking into consideration available tax credits and rebates. The charge for current tax also includes adjustments where considered necessary, relating to prior years which arise from assessments framed / finalized during the year.

### Deferred

Deferred tax is recognized using the balance sheet liability method on all temporary differences between the amounts attributed to assets and liabilities for financial reporting purposes and amounts used for taxation purposes. The Group records deferred tax assets / liabilities using the tax rates, enacted or substantively enacted by the balance sheet date expected to be applicable at the time of its reversal. Deferred tax asset is recognized only to the extent that it is probable that future taxable profits will be available against which the asset can be utilized. Deferred tax assets are reduced to the extent that it is no longer probable that the related tax benefit will be realized. The Group also recognizes deferred tax asset / liability on deficit / surplus on revaluation of securities and deferred tax liability on surplus on revaluation of fixed assets which is adjusted against the related deficit / surplus in accordance with the requirements of International Accounting Standard (IAS) 12, 'Income Taxes'.

Deferred tax liability is not recognized in respect of taxable temporary differences associated with exchange translation reserves of foreign operations and subsidiary, where the timing of the reversal of the temporary difference can be controlled and it is probable that the temporary differences will not reverse in the foreseeable future.

## 6.10 Provisions

Provisions are recognized when the Group has a legal or constructive obligation as a result of past events and it is probable that an outflow of resources will be required to settle the obligation and a reliable estimate of the amount can be made. Provisions are reviewed at each balance sheet date and are adjusted to reflect the current best estimates.

## 6.11 Foreign currencies

### 6.11.1 Foreign currency transactions

Transactions in foreign currencies other than the results of foreign operations discussed in note 6.11.2 are translated to Rupees at the foreign exchange rates prevailing on the transaction date. Monetary assets and liabilities in foreign currencies are expressed in Rupee terms at the rates of exchange prevailing at the balance sheet date. Forward foreign exchange contracts are valued at the rates applicable to their respective maturities.

### 6.11.2 Foreign operations

The assets and liabilities of foreign branches and subsidiary are translated to Rupees at exchange rates prevailing at the statement of financial position date. The results of foreign operations and subsidiary are translated to Rupees at the average rate of exchange for the year.

### 6.11.3 Translation gains and losses

Translation gains and losses are included in the consolidated profit and loss account, except those arising on the translation of the Group's net investment in foreign branches and subsidiary, which are taken to the capital reserve (exchange translation reserve) until the disposal of the net investment, at which time these are recognized in the consolidated profit and loss account.

### 6.11.4 Commitments

Commitments for outstanding forward foreign exchange contracts are disclosed in these consolidated financial statements at committed amounts. Contingent liabilities / commitments for letters of credit and letters of guarantee denominated in foreign currencies are expressed in Rupee terms at the rates of exchange prevailing at the statement of financial position date.

# Notes To The Consolidated Financial Statements

For the year ended December 31, 2020

## 6.12 Acceptances

Acceptances comprise undertakings by the Group to pay bills of exchange drawn on customers. The Group expects most acceptances to be simultaneously settled with the reimbursement from the customers.

## 6.13 Revenue recognition

- Mark-up / interest on advances and returns on investments are recognized on a time proportion basis using the effective interest method except that mark-up / interest on non-performing advances and investments is recognized on a receipt basis, in accordance with the requirements of the Prudential Regulations issued by the State Bank of Pakistan (SBP) or as permitted by the regulations of the overseas regulatory authorities of countries where the branches operate. Where debt securities are purchased at premium or discount, such premium / discount is amortized through the consolidated profit and loss account over the remaining period of maturity.
- Financing method is used in accounting for income from lease financing. Under this method, the unearned lease income (excess of the sum of total lease rentals and estimated residual value over the cost of leased assets) is deferred and taken to income over the term of the lease period so as to produce a constant periodic rate of return on the outstanding net investment in lease. Gains / losses on termination of lease contracts are recognized as income when these are realized.
- Profit on investments in Sukuks is recognised on time proportion basis. Where Sukuks (excluding those classified as held for trading) are purchased at a premium or discount, such premiums / discounts are amortised through the profit or loss account using the effective yield method.
- Profit on Salam financing is recognised on time proportion basis.
- Profit on Running Musharaka financing is booked on an accrual basis and is subject to adjustment (if any) upon declaration of profit by Musharakah partners.
- Commission income is recognized on a time proportion basis.
- Dividend income is recognized when the Group's right to receive dividend is established.
- Gain / loss on sale of investments is credited / charged to the consolidated profit and loss account currently.
- Rental income from Ijarah financing is recognised on an accrual basis. Depreciation on Ijarah asset is charged to income (net of with rental income) over the period of Ijarah using the straight line method.
- Profit from Bai-Mua'jjal is recognised on a time proportionate basis.
- Profit on Diminishing Musharaka is recognised on a time proportionate basis.
- Profit on Istisna financing is recognised on a time proportionate basis.
- Profit from Musharaka placements with financial institutions is recognised on a time proportionate basis.
- Profit from Murabaha financing is accounted for on culmination of Murabaha transaction. Profit on Murabaha is recognised on an accrual basis. Profit on Murabaha transactions for the period from the date of disbursement to the date of culmination of Murabaha is recognised immediately on the later date.
- Revenue for acting as trustee is recognized on Net Assets Value (NAV) of respective funds.
- Management / advisory fee is calculated on a daily / monthly basis by charging specified rates to the net assets value / income of the Collective Investment Schemes. Advisory fee from the discretionary portfolio is calculated in accordance with the respective agreements with the clients. Management fee from the pension funds is calculated by charging the specified rates to the average net assets value.
- Revenue from trusteeship and custodian is recognised when the group satisfies a performance obligation by rendering promised services as per respective agreements.

# Notes To The Consolidated Financial Statements

For the year ended December 31, 2020

The income on Islamic financing is recognised in accordance with the principles of Islamic Shari'ah and in accordance with regulations and guidelines of the State Bank of Pakistan. However, income, if any, received which does not comply with the principles of Islamic Shari'ah is recognised as charity payable if so directed by the Shari'ah Board of the Group.

## 6.14 Assets acquired in satisfaction of claims

Non-banking assets (NBA) acquired in satisfaction of claims are carried at revalued amounts less accumulated depreciation and impairment loss. These assets are revalued by professionally qualified valuers with sufficient regularity to ensure that their net carrying value does not differ materially from their fair value. A surplus arising on revaluation of property is credited to the 'surplus on revaluation of non banking assets' account through consolidated statement of comprehensive income in equity and any deficit arising on revaluation is taken to consolidated profit and loss account directly. Legal fees, transfer costs and direct costs of acquiring title to property are charged to the consolidated profit and loss account and not capitalized.

## 6.15 Cash and cash equivalents

Cash and cash equivalents include cash and balances with treasury banks and balances with other banks (net of overdrawn Nostro balances) in current and deposit accounts.

## 6.16 Financial instruments

### 6.16.1 Financial assets and financial liabilities

Financial instruments carried on the statement of financial position include cash and balances with treasury banks, balances with other banks, lendings to financial institutions, investments, advances, other assets, bills payable, borrowings, deposits and other liabilities. The particular recognition methods adopted for significant financial assets and financial liabilities are disclosed in the individual policy statements associated with these assets and liabilities.

### 6.16.2 Derivative financial instruments

Derivative financial instruments are initially recognized at fair value on the date on which a derivative contract is entered into and are subsequently remeasured at their fair value using valuation techniques. All the derivative financial instruments are carried as an asset when the fair value is positive and as a liability when the fair value is negative. Any change in the fair value of derivative financial instruments is taken to the consolidated profit and loss account currently.

### 6.16.3 Off setting

Financial assets and financial liabilities are off set and the net amount is reported in these consolidated financial statements when there is a legally enforceable right to set off and the Group intends either to settle on a net basis, or to realize the assets and settle the liabilities, simultaneously.

## 6.17 Borrowings / deposits

Borrowings / deposits are recorded at the proceeds received. The cost of borrowings / deposits is recognized as an expense in the period in which this is incurred.

Deposits, with respect to Islamic Banking operations, are generated on the basis of two modes i.e. Qard and Mudaraba.

Deposits taken on Qard basis are classified as 'Current accounts' and Deposits generated on Mudaraba basis are classified as 'Savings deposits' or 'Fixed deposits'. No profit or loss is passed to current account depositors.

Profits realized in investment pools are distributed in pre-agreed profit sharing ratio. Rab-ul-Maal share is distributed among depositors according to weightages assigned at the inception of profit calculation period.

# Notes To The Consolidated Financial Statements

For the year ended December 31, 2020

Profits are distributed from the pool such that the depositors (remunerative) only bear the risk of assets in the pool during the profit calculation period. In case of loss in a pool during the profit calculation period, the loss is distributed among the depositors (remunerative) according to their ratio of Investments.

Asset pools may be created at the Group's discretion and the Group may add, amend, and transfer an asset to any other pool in the interests of the deposit holders.

## 6.18 Segment reporting

A segment is a distinguishable component of the Group that is engaged in providing products or services (business segment) or in providing products or services within a particular economic environment (geographical segment), which is subject to risks and rewards that are different from those of other segments. The Group's primary format of reporting is based on business segments.

### 6.18.1 Business segments

#### Retail banking

This includes retail lending and deposits, banking services, cards and branchless banking.

#### Corporate banking

This comprises of loans, deposits, project financing, trade financing, investment banking and other banking activities / with Group's corporate and public sector customers.

#### Consumer Banking

This segment primarily constitutes consumer financing activities with individual customers of the Group. Product suite offered to these customers include credit cards, auto loans, housing finance and personal loans.

#### Islamic Banking

This segment includes Islamic Banking operations of the Group.

#### Treasury

This includes fixed income, equity, foreign exchange, credit, funding, own position securities, lendings and borrowings and derivatives for hedging and market making.

#### Assets Management

It includes asset management, investment advisory, portfolio management, equity research and underwriting.

#### International Banking

This comprises of loans, deposits, project financing, trade financing, investment banking and other banking activities by Group's overseas operations.

#### Others

This includes the head office related activities and other functions which cannot be classified in any of the above segments.

### 6.18.2 Geographical segments

The Group operates in four geographic regions being:

- Pakistan
- South Asia
- Middle East
- Eurasia



# Notes To The Consolidated Financial Statements

For the year ended December 31, 2020

## 6.19 Dividend distribution and appropriation

Dividends (including bonus dividend) and other appropriations (except appropriations which are required by law) are recognized in the period in which these are approved.

## 6.20 Business combination

Business combinations other than under common control transaction are accounted for by applying the acquisition method. The cost of acquisition is measured as the fair value of assets given, equity instruments issued and the liabilities incurred or assumed at the date of acquisition. The consideration transferred includes the fair value of any asset or liability resulting from a contingent consideration arrangement, if any. Acquisition-related costs are expensed as incurred. Identifiable assets acquired and liabilities and contingent liabilities assumed in a business combination are measured initially at their fair values at the acquisition date. The excess of the consideration transferred over the fair value of the identifiable net assets acquired is recorded as goodwill. If this is less than the fair value of the net assets acquired in the case of a bargain purchase, the difference is recognized directly in the consolidated profit and loss account or as directed by the SBP.

## 6.21 Earnings per share

The Group presents basic and diluted earnings per share (EPS). Basic EPS is calculated by dividing the profit or loss attributable to ordinary shareholders of the Group by the weighted average number of ordinary shares outstanding during the year.

## 6.22 Pool Management

The Group operates general and specific pools for deposits and inter-Group funds accepted / acquired under Mudaraba, Musharaka and Wakala modes.

Under the general deposits pool, the Group accepts funds on Mudaraba basis from depositors (Rabb-ul-Maal) where the Group acts as Manager (Mudarib) and invests the funds in the Shari'ah Compliant modes of financings, investments and placements. When utilising investing funds, the Group prioritizes the funds received from depositors over the funds generated from own sources.

Specific pools may be operated for funds acquired / accepted from the State Bank of Pakistan and other Groups for Islamic Export Refinance to Group's customers and liquidity management respectively under the Musharaka / Mudaraba modes. The Group also maintains an Equity Pool which consists of Group's equity and funds accepted on Qard (non-remunerative current deposit account) basis.

The profit of each deposit pool is calculated on all the remunerative assets booked by utilizing the funds from the pool after deduction of expenses directly incurred in earning the income of such pool, if any. The directly related costs comprise of depreciation on Ijarah assets, takaful premium, documentation charges etc. No general or administrative nature of expense is charged to pool. No provision against any non-performing asset of the pool is passed on to the pool except on the actual loss / write-off of such non-performing asset. The profit of the pool is shared between equity and other members of the pool on the basis of Musharaka at gross level (before charging of Mudarib fee) as per the investment ratio of the equity. The profit of the pool is shared among the members of the pool on pre-defined mechanism based on the weightages announced before the profit calculation period after charging of Mudarib fee.

The deposits and funds accepted under the above mentioned pools are provided to diversified sectors and avenues of the economy / business as mentioned in the notes and are also invested in Government of Pakistan backed Ijarah Sukuks. Staff financings are exclusively financed from the equity pool.

The risk characteristic of each pool mainly depends on the assets and liability profile of each pool.

# Notes To The Consolidated Financial Statements

For the year ended December 31, 2020

## 6.23 Funds due to / from financial institutions

### Bai Mu'ajjal

In Bai Mu'ajjal, the Group sells sukuk on credit to other financial institutions. The credit price is agreed at the time of sale and such proceeds are received at the end of the credit period.

### Musharaka / Mudaraba / Wakala

In Musharaka / Mudaraba / Wakala, the Group invests in the Shariah compliant business pools of the financial institutions at the agreed profit and loss sharing ratio / fees.

|                                                 | Note | 2020<br>(Rupees in '000) | 2019        |
|-------------------------------------------------|------|--------------------------|-------------|
| <b>7. CASH AND BALANCES WITH TREASURY BANKS</b> |      |                          |             |
| In hand                                         |      |                          |             |
| Local currency                                  |      | 25,039,386               | 20,833,520  |
| Foreign currencies                              |      | 7,088,257                | 2,802,190   |
|                                                 |      | 32,127,643               | 23,635,710  |
| With State Bank of Pakistan in                  |      |                          |             |
| Local currency current account                  | 7.1  | 51,920,851               | 62,180,493  |
| Foreign currency current account                | 7.2  | 2,271,659                | 599,384     |
| Foreign currency deposit account                | 7.3  | 10,532,776               | 14,320,863  |
|                                                 |      | 64,725,286               | 77,100,740  |
| With other central banks in                     |      |                          |             |
| Foreign currency current account                | 7.4  | 11,851,311               | 16,220,148  |
| With National Bank of Pakistan in               |      |                          |             |
| Local currency current account                  |      | 22,308,442               | 25,666,525  |
| Prize bonds                                     |      | 1,040,359                | 334,235     |
|                                                 |      | 132,053,041              | 142,957,358 |

**7.1** This represents current accounts maintained with the SBP under the Cash Reserve Requirement of section 22 of the Banking Companies Ordinance, 1962.

**7.2** This represents US Dollar settlement account maintained with SBP.

**7.3** This represents account maintained with the SBP to comply with the Special Cash Reserve requirement. This includes balance of Rs. 6,810.656 million (2019: Rs. 10,517.551 million) which carries interest rate of 0% (2019: 0.70%) per annum as declared by SBP.

**7.4** Foreign currency current account with other central banks are maintained to meet their minimum cash reserves and capital requirements pertaining to the foreign branches of the Bank.

## Notes To The Consolidated Financial Statements

For the year ended December 31, 2020

|                                     | Note | 2020<br>(Rupees in '000) | 2019       |
|-------------------------------------|------|--------------------------|------------|
| <b>8. BALANCES WITH OTHER BANKS</b> |      |                          |            |
| In Pakistan                         |      |                          |            |
| In current account                  |      | 9,190                    | 9,183      |
| In deposit account                  | 8.1  | 1,554                    | 4,378,142  |
|                                     |      | 10,744                   | 4,387,325  |
| Outside Pakistan                    |      |                          |            |
| In current account                  |      | 26,768,812               | 12,838,712 |
| In deposit account                  | 8.2  | 2,231,965                | 4,145,716  |
|                                     |      | 29,000,777               | 16,984,428 |
|                                     |      | 29,011,521               | 21,371,753 |

**8.1** This represents saving accounts carrying profit at expected rates ranging from 2.13% to 6.00% per annum (2019: 3% to 12.54% per annum).

**8.2** Balances with other banks outside Pakistan in deposit accounts carry interest rate of 1.5% (2019: 2.60% to 8.30%) per annum.

|                                                      | Note | 2020<br>(Rupees in '000) | 2019      |
|------------------------------------------------------|------|--------------------------|-----------|
| <b>9. LENDINGS TO FINANCIAL INSTITUTIONS</b>         |      |                          |           |
| Call / clean money lendings                          | 9.1  | 11,002,195               | 209,205   |
| Repurchase agreement lendings (Reverse Repo)         | 9.2  | 6,137,258                | –         |
| Musharaka arrangements                               |      | –                        | 2,480,000 |
| Bai Muajjal receivable - with State Bank of Pakistan | 9.3  | 828,790                  | 3,371,664 |
|                                                      |      | 17,968,243               | 6,060,869 |

**9.1** Call money lending carries mark-up rate of 0.1% to 4.55% (2019: 7 %) per annum and is due to mature in January 2021.

**9.2** Repurchase agreement lendings carry mark-up rates of 6.4% to 7.1% per annum and is due to mature in January 2021.

**9.3** This represents Bai Muajjal receivable arrangements with State Bank of Pakistan carries rate of 9.14% per annum (2019: average rate of 10.34%) and having maturity till January 2021.

|                                   |  | 2020<br>(Rupees in '000) | 2019      |
|-----------------------------------|--|--------------------------|-----------|
| <b>9.4 Particulars of lending</b> |  |                          |           |
| In local currency                 |  | 6,966,048                | 5,851,664 |
| In foreign currencies             |  | 11,002,195               | 209,205   |
|                                   |  | 17,968,243               | 6,060,869 |

# Notes To The Consolidated Financial Statements

For the year ended December 31, 2020

|                  |                                                                          | 2020         |                             |           | 2019         |                             |       |
|------------------|--------------------------------------------------------------------------|--------------|-----------------------------|-----------|--------------|-----------------------------|-------|
|                  |                                                                          | Held by Bank | Further given as collateral | Total     | Held by Bank | Further given as collateral | Total |
| (Rupees in '000) |                                                                          |              |                             |           |              |                             |       |
| 9.5              | Securities held as collateral against lendings to financial institutions |              |                             |           |              |                             |       |
|                  | Market Treasury Bills                                                    | 6,137,258    | –                           | 6,137,258 | –            | –                           | –     |
|                  | Total                                                                    | 6,137,258    | –                           | 6,137,258 | –            | –                           | –     |

## 10. INVESTMENTS

### 10.1 Investments by type:

|                  |                                      | 2020                 |                          |                    |                | 2019                 |                          |                   |                |
|------------------|--------------------------------------|----------------------|--------------------------|--------------------|----------------|----------------------|--------------------------|-------------------|----------------|
| Note             |                                      | Cost/ amortised cost | Provision for diminution | Surplus/ (Deficit) | Carrying value | Cost/ amortised cost | Provision for diminution | Surplus (Deficit) | Carrying value |
| (Rupees in '000) |                                      |                      |                          |                    |                |                      |                          |                   |                |
|                  | <b>Held-for-trading securities</b>   |                      |                          |                    |                |                      |                          |                   |                |
|                  | Federal Government Securities        | 1,309,116            | –                        | (224)              | 1,308,892      | 9,479,849            | –                        | (4,128)           | 9,475,721      |
|                  | Shares and units                     | 1,158,952            | –                        | 110,493            | 1,269,445      | 1,062,839            | –                        | 88,114            | 1,150,953      |
|                  |                                      | 2,468,068            | –                        | 110,269            | 2,578,337      | 10,542,688           | –                        | 83,986            | 10,626,674     |
|                  | <b>Available-for-sale securities</b> |                      |                          |                    |                |                      |                          |                   |                |
|                  | Federal Government Securities        | 969,144,840          | (4,719)                  | 9,477,853          | 978,617,974    | 677,027,359          | –                        | 4,973,965         | 682,001,324    |
|                  | Shares and units                     | 28,398,065           | (11,155,719)             | 3,412,147          | 20,654,493     | 26,846,236           | (11,207,932)             | 1,673,181         | 17,311,485     |
|                  | Non Government Debt Securities       | 2,841,840            | –                        | 16,780             | 2,858,620      | 2,428,773            | –                        | (4,671)           | 2,424,102      |
|                  | Foreign Securities                   | 7,463,939            | (1,714)                  | 17,509             | 7,479,734      | 3,657,020            | –                        | 13,295            | 3,670,315      |
|                  |                                      | 1,007,848,684        | (11,162,152)             | 12,924,289         | 1,009,610,821  | 709,959,388          | (11,207,932)             | 6,655,770         | 705,407,226    |
|                  | <b>Held-to-maturity securities</b>   |                      |                          |                    |                |                      |                          |                   |                |
|                  | Federal Government Securities        | 7,313,217            | (11,542)                 | –                  | 7,301,675      | 18,908,076           | (2,211)                  | –                 | 18,905,865     |
|                  | Provincial Government Securities     | 118                  | (118)                    | –                  | –              | 118                  | (118)                    | –                 | –              |
|                  | Non Government Debt Securities       | 9,615,317            | (490,341)                | –                  | 9,124,976      | 10,442,925           | (533,788)                | –                 | 9,909,137      |
|                  | Foreign Securities                   | 3,149,647            | (27,281)                 | –                  | 3,122,366      | 8,320,599            | (3,569)                  | –                 | 8,317,030      |
|                  |                                      | 20,078,299           | (529,282)                | –                  | 19,549,017     | 37,671,718           | (539,686)                | –                 | 37,132,032     |
|                  | <b>Associates</b>                    | 4,479,360            | –                        | –                  | 4,479,360      | 4,275,658            | –                        | –                 | 4,275,658      |
|                  | <b>Total Investments</b>             | 1,034,874,411        | (11,691,434)             | 13,034,558         | 1,036,217,535  | 762,449,452          | (11,747,618)             | 6,739,756         | 757,441,590    |

# Notes To The Consolidated Financial Statements

For the year ended December 31, 2020

## 10.2 Investments by segments:

| Note                                       | 2020                       |                                |                       |                   | 2019                       |                                |                      |                   |
|--------------------------------------------|----------------------------|--------------------------------|-----------------------|-------------------|----------------------------|--------------------------------|----------------------|-------------------|
|                                            | Cost/<br>amortised<br>cost | Provision<br>for<br>diminution | Surplus/<br>(Deficit) | Carrying<br>value | Cost/<br>amortised<br>cost | Provision<br>for<br>diminution | Surplus<br>(Deficit) | Carrying<br>value |
| (Rupees in '000)                           |                            |                                |                       |                   |                            |                                |                      |                   |
| <b>Federal Government Securities:</b>      |                            |                                |                       |                   |                            |                                |                      |                   |
| Market Treasury Bills                      | 598,470,191                | -                              | 256,237               | 598,726,428       | 397,866,023                | -                              | (413,415)            | 397,452,608       |
| Pakistan Investment Bonds                  | 349,738,865                | -                              | 9,180,611             | 358,919,476       | 292,723,081                | -                              | 5,376,303            | 298,099,384       |
| Sukuks bonds                               | 24,294,814                 | (2,872)                        | (24,383)              | 24,267,559        | 11,094,999                 | -                              | 6,949                | 11,101,948        |
| Naya Pakistan Certificates                 | 465,779                    | -                              | -                     | 465,779           | -                          | -                              | -                    | -                 |
| Euro Bonds                                 | 2,096,697                  | (13,389)                       | 65,166                | 2,148,474         | 1,030,354                  | (2,211)                        | -                    | 1,028,143         |
| Bai Mu'ajjal                               | 2,700,827                  | -                              | -                     | 2,700,827         | 2,700,827                  | -                              | -                    | 2,700,827         |
|                                            | 977,767,173                | (16,261)                       | 9,477,631             | 987,228,543       | 705,415,284                | (2,211)                        | 4,969,837            | 710,382,910       |
| <b>Provincial Government Securities</b>    |                            |                                |                       |                   |                            |                                |                      |                   |
|                                            | 118                        | (118)                          | -                     | -                 | 118                        | (118)                          | -                    | -                 |
| <b>Shares:</b>                             |                            |                                |                       |                   |                            |                                |                      |                   |
| Listed Companies                           | 27,974,567                 | (10,986,392)                   | 3,522,638             | 20,510,813        | 26,355,910                 | (11,042,016)                   | 1,761,295            | 17,075,189        |
| Unlisted Companies                         | 1,582,450                  | (169,325)                      | -                     | 1,413,125         | 1,553,165                  | (165,916)                      | -                    | 1,387,249         |
|                                            | 29,557,017                 | (11,155,717)                   | 3,522,638             | 21,923,938        | 27,909,075                 | (11,207,932)                   | 1,761,295            | 18,462,438        |
| <b>Non Government Debt Securities</b>      |                            |                                |                       |                   |                            |                                |                      |                   |
| Listed                                     | 5,613,730                  | (16,269)                       | 12,037                | 5,609,498         | 5,800,646                  | (16,269)                       | (2,050)              | 5,782,327         |
| Unlisted                                   | 6,843,427                  | (474,072)                      | 4,743                 | 6,374,098         | 7,071,052                  | (517,519)                      | (2,621)              | 6,550,912         |
|                                            | 12,457,157                 | (490,341)                      | 16,780                | 11,983,596        | 12,871,698                 | (533,788)                      | (4,671)              | 12,333,239        |
| <b>Foreign Securities</b>                  |                            |                                |                       |                   |                            |                                |                      |                   |
| Government securities                      | 10,606,326                 | (27,281)                       | 17,509                | 10,596,554        | 11,517,802                 | (2,828)                        | 13,295               | 11,528,269        |
| Non Government Debt securities             | -                          | -                              | -                     | -                 | 452,567                    | (741)                          | -                    | 451,826           |
| Unlisted equity securities                 | 7,260                      | (1,716)                        | -                     | 5,544             | 7,250                      | -                              | -                    | 7,250             |
|                                            | 10,613,586                 | (28,997)                       | 17,509                | 10,602,098        | 11,977,619                 | (3,569)                        | 13,295               | 11,987,345        |
| <b>Associates</b>                          |                            |                                |                       |                   |                            |                                |                      |                   |
| - Adamjee Insurance Company Limited 10.9   | 4,435,075                  | -                              | -                     | 4,435,075         | 4,211,707                  | -                              | -                    | 4,211,707         |
| - Euronet Pakistan (Private) Limited 10.10 | 44,285                     | -                              | -                     | 44,285            | 63,951                     | -                              | -                    | 63,951            |
|                                            | 4,479,360                  | -                              | -                     | 4,479,360         | 4,275,658                  | -                              | -                    | 4,275,658         |
| <b>Total Investments</b>                   | 1,034,874,411              | (11,691,434)                   | 13,034,558            | 1,036,217,535     | 762,449,452                | (11,747,618)                   | 6,739,756            | 757,441,590       |

**2020**                      **2019**  
(Rupees in '000)

### 10.2.1 Investments given as collateral

|                             |                   |                   |
|-----------------------------|-------------------|-------------------|
| - Market Treasury Bills     | 91,279,273        | 22,820,226        |
| - Pakistan Investment Bonds | 1,000,283         | 5,316,208         |
|                             | <b>92,279,556</b> | <b>28,136,434</b> |

# Notes To The Consolidated Financial Statements

For the year ended December 31, 2020

## 10.3 Provision for diminution in value of investments

|                                | Note   | 2020<br>(Rupees in '000) | 2019       |
|--------------------------------|--------|--------------------------|------------|
| <b>10.3.1 Opening balance</b>  |        | 11,747,618               | 8,746,566  |
| Exchange and other adjustments |        | 13,474                   | 251        |
| Charge / (reversals)           |        |                          |            |
| Charge for the year            |        | 1,993,335                | 3,452,808  |
| Reversals for the year         |        | (1,529)                  | (29,964)   |
| Reversal on disposals          |        | (2,061,464)              | (422,043)  |
|                                |        | (69,658)                 | 3,000,801  |
| Amounts written off            |        | –                        | –          |
| Closing balance                | 10.3.3 | 11,691,434               | 11,747,618 |

## 10.3.2 Particulars of provision against debt securities

### Category of classification

|                 | 2020             |           | 2019    |           |
|-----------------|------------------|-----------|---------|-----------|
|                 | NPI              | Provision | NPI     | Provision |
|                 | (Rupees in '000) |           |         |           |
| <b>Domestic</b> |                  |           |         |           |
| Doubtful        | –                | –         | 145,656 | 72,828    |
| Loss            | 490,459          | 490,459   | 461,078 | 461,078   |
|                 | 490,459          | 490,459   | 606,734 | 533,906   |

**10.3.3** This includes a general provision of Rs 43.542 million (December 31, 2019: Rs 5.780 million) held by overseas branches in accordance with the requirements of IFRS 9.

## 10.4 Quality of Available for Sale Securities

Details regarding quality of Available for Sale (AFS) securities are as follows;

|                                                              | 2020             | 2019        |
|--------------------------------------------------------------|------------------|-------------|
|                                                              | Cost             |             |
|                                                              | (Rupees in '000) |             |
| <b>Federal Government Securities - Government guaranteed</b> |                  |             |
| Market Treasury Bills                                        | 597,161,075      | 386,882,153 |
| Pakistan Investment Bonds                                    | 346,405,146      | 278,739,813 |
| Euro Bonds                                                   | 1,341,706        | 506,323     |
| Sukuk Bonds                                                  | 23,771,134       | 10,899,070  |
| Naya Pakistan Certificates                                   | 465,779          | –           |
|                                                              | 969,144,840      | 677,027,359 |

## Notes To The Consolidated Financial Statements

For the year ended December 31, 2020

|                                          | 2020              |  | 2019              |  |
|------------------------------------------|-------------------|--|-------------------|--|
|                                          | Cost              |  |                   |  |
|                                          | (Rupees in '000)  |  |                   |  |
| <b>Listed Companies and mutual funds</b> |                   |  |                   |  |
| Automobile Assembler                     | 1,573,156         |  | 1,385,302         |  |
| Automobile Part and Accessories          | 413,930           |  | 413,930           |  |
| Cable and Electrical Goods               | 659,439           |  | 659,439           |  |
| Cement                                   | 2,050,172         |  | 2,100,969         |  |
| Chemical                                 | 285,638           |  | 76,050            |  |
| Close end Mutual Fund                    | 1,186,851         |  | 1,186,851         |  |
| Commercial Banks                         | 3,002,215         |  | 2,014,437         |  |
| Engineering                              | 1,854,002         |  | 2,085,008         |  |
| Fertilizer                               | 3,469,300         |  | 3,047,663         |  |
| Food and Personal Care Products          | 1,229,398         |  | 1,199,266         |  |
| Insurance                                | 599,364           |  | 599,364           |  |
| Investment Banks / Companies             | 41,784            |  | 41,784            |  |
| NIT Units                                | 5,253             |  | 5,253             |  |
| Oil & Gas Exploration Companies          | 2,864,529         |  | 2,649,990         |  |
| Oil & Gas Marketing Companies            | 760,532           |  | 742,705           |  |
| Open End Mutual Fund                     | 190,083           |  | 312,349           |  |
| Paper and Board                          | 648,581           |  | 700,059           |  |
| Pharmaceutical                           | 1,103,230         |  | 1,230,160         |  |
| Power Generation and Distribution        | 2,616,001         |  | 2,616,001         |  |
| Real Estate Investment Trust             | -                 |  | -                 |  |
| Refinery                                 | 1,107,388         |  | 981,399           |  |
| Technology and Communication             | 707,827           |  | 706,796           |  |
| Textile                                  | 446,942           |  | 538,296           |  |
|                                          | <b>26,815,615</b> |  | <b>25,293,071</b> |  |

|                                                   | 2020             |                  | 2019             |                  |
|---------------------------------------------------|------------------|------------------|------------------|------------------|
|                                                   | Cost             | Breakup value    | Cost             | Breakup value    |
|                                                   | (Rupees in '000) |                  |                  |                  |
| <b>Unlisted Companies</b>                         |                  |                  |                  |                  |
| Central Depository Company Limited                | 184,426          | 756,153          | 184,426          | 687,011          |
| First Capital Investment (Pvt) Limited            | 2,500            | 2,667            | 2,500            | 3,334            |
| First Women Bank Limited                          | 63,300           | 215,838          | 63,300           | 215,838          |
| ISE Towers Reit Management Company Limited        | 30,346           | 93,780           | 30,346           | 87,958           |
| National Investment Trust Limited                 | 1,027,651        | 1,661,565        | 1,027,651        | 1,665,882        |
| National Institutional Facilitation Technologies  | 1,527            | 51,998           | 1,527            | 51,641           |
| Pak Agro Storage And Service Corporation          | 2,500            | 1,239,050        | 2,500            | 605,006          |
| 1 Link (Pvt) Limited                              | 50,000           | 202,032          | 50,000           | 147,332          |
| Naymat Collateral Management Company              | 29,285           | 25,876           | -                | -                |
| Arabian Sea Country Club                          | 5,000            | -                | 5,000            | -                |
| SME Bank Limited                                  | 10,106           | -                | 10,106           | -                |
| Al-Ameen Textile Mills Limited                    | 197              | -                | 197              | -                |
| Custodian Management Services                     | 1,000            | -                | 1,000            | -                |
| Galaxy Textile Mills Limited                      | 30,178           | -                | 30,178           | -                |
| Pakistan Textile City (Pvt) Limited               | 50,000           | -                | 50,000           | -                |
| Ayaz Textile Mills Limited                        | 2,253            | -                | 2,253            | -                |
| Musarrat Textile Mills Limited                    | 36,045           | -                | 36,045           | -                |
| Sadiqabad Textile Mills Limited                   | 26,361           | -                | 26,361           | -                |
| Al-Arabia Sugar Mills Limited - Preference shares | 4,775            | -                | 4,775            | -                |
| Pak Elektron Limited - Preference shares          | 25,000           | 25,000           | 25,000           | 25,000           |
|                                                   | <b>1,582,450</b> | <b>4,273,959</b> | <b>1,553,165</b> | <b>3,489,002</b> |

# Notes To The Consolidated Financial Statements

For the year ended December 31, 2020

|                                       | 2020             | 2019             |
|---------------------------------------|------------------|------------------|
|                                       | Cost             |                  |
|                                       | (Rupees in '000) |                  |
| <b>Non Government Debt Securities</b> |                  |                  |
| <b>Listed</b>                         |                  |                  |
| - AA+, AA, AA-                        | 1,676,840        | 1,086,840        |
| - A+, A, A-                           | 75,000           | 150,000          |
|                                       | <u>1,751,840</u> | <u>1,236,840</u> |
| <b>Unlisted</b>                       |                  |                  |
| - AA+, AA, AA-                        | 990,000          | 990,000          |
| - A+, A, A-                           | 100,000          | 201,933          |
|                                       | <u>1,090,000</u> | <u>1,191,933</u> |

|                              | 2020             |        | 2019             |        |
|------------------------------|------------------|--------|------------------|--------|
|                              | Cost             | Rating | Cost             | Rating |
|                              | (Rupees in '000) |        |                  |        |
| <b>Foreign Securities</b>    |                  |        |                  |        |
| <b>Government Securities</b> |                  |        |                  |        |
| - Bahrain                    | -                | -      | -                | -      |
| - Sri Lanka                  | 7,456,679        | Caa1   | 3,649,770        | B2     |
|                              | <u>7,456,679</u> |        | <u>3,649,770</u> |        |

|                                                                                 | 2020             | 2019              |
|---------------------------------------------------------------------------------|------------------|-------------------|
|                                                                                 | Cost             |                   |
|                                                                                 | (Rupees in '000) |                   |
| <b>Unlisted</b>                                                                 |                  |                   |
| Lanka Clear (Private) Limited                                                   | 857              | 854               |
| Credit Information Bureau of Sri Lanka                                          | 26               | 26                |
| Lanka Financial Services Bureau Limited                                         | 1,714            | 1,707             |
| Society for Worldwide Inter Fund Transfer (SWIFT)                               | 4,663            | 4,663             |
|                                                                                 | <u>7,260</u>     | <u>7,250</u>      |
| <b>10.5 Particulars relating to Held to Maturity securities are as follows:</b> |                  |                   |
| <b>Federal Government Securities - Government guaranteed</b>                    |                  |                   |
| Pakistan Investment Bonds                                                       | 3,333,719        | 13,842,253        |
| Market Treasury Bills                                                           | -                | 1,645,036         |
| Sukuk bonds                                                                     | 523,680          | 195,928           |
| Euro Bonds                                                                      | 754,991          | 524,032           |
| Bai Mu'ajjal                                                                    | 2,700,827        | 2,700,827         |
|                                                                                 | <u>7,313,217</u> | <u>18,908,076</u> |
| <b>Provincial Government Securities</b>                                         | <u>118</u>       | <u>118</u>        |



## Notes To The Consolidated Financial Statements

For the year ended December 31, 2020

|                                       | 2020             | 2019             |
|---------------------------------------|------------------|------------------|
|                                       | Cost             |                  |
|                                       | (Rupees in '000) |                  |
| <b>Non Government Debt Securities</b> |                  |                  |
| <b>Listed</b>                         |                  |                  |
| - AAA                                 | 1,796,250        | 1,796,970        |
| - AA+, AA, AA-                        | 1,989,520        | 2,700,716        |
| - Unrated                             | 66,120           | 66,120           |
|                                       | <b>3,851,890</b> | <b>4,563,806</b> |
| <b>Unlisted</b>                       |                  |                  |
| - AA+, AA, AA-                        | 4,849,483        | 4,848,863        |
| - A+, A, A-                           | 439,874          | 439,910          |
| - Unrated                             | 474,070          | 590,346          |
|                                       | <b>5,763,427</b> | <b>5,879,119</b> |

|                              | 2020             |        | 2019             |        |
|------------------------------|------------------|--------|------------------|--------|
|                              | Cost             | Rating | Cost             | Rating |
|                              | (Rupees in '000) |        |                  |        |
| <b>Foreign Securities</b>    |                  |        |                  |        |
| <b>Government Securities</b> |                  |        |                  |        |
| - Sri Lanka                  | 3,149,647        | Caa1   | 1,544,542        | B2     |
| - United Arab Emirates       | -                |        | 6,323,490        | Aa2    |
|                              | <b>3,149,647</b> |        | <b>7,868,032</b> |        |

|                                       | 2020             | 2019           |
|---------------------------------------|------------------|----------------|
|                                       | Cost             |                |
|                                       | (Rupees in '000) |                |
| <b>Non Government Debt Securities</b> |                  |                |
| <b>Listed</b>                         |                  |                |
| - A+, A, A-                           | -                | 153,702        |
| <b>Unlisted</b>                       |                  |                |
| - AAA                                 | -                | 298,865        |
|                                       | <b>-</b>         | <b>298,865</b> |

**10.5.1** The market value of securities classified as held-to-maturity as at December 31, 2020 amounted to Rs. 17,351.392 million (December 31, 2019: Rs. 34,043.148 million).

**10.6** "Available for sale" Market Treasury Bills and Pakistan Investment Bonds are eligible for rediscounting with the State Bank of Pakistan.

**10.7** Investments include Pakistan Investment Bonds amounting to Rs. 67.9 million (2019: Rs. 67.9 million) earmarked by the SBP against TT discounting facilities sanctioned to the Bank. In addition, Pakistan Investment Bonds amounting to Rs. 5 million (2019: Rs. 5 million) have been pledged with the Controller of Military Accounts on account of Regimental Fund account and Pakistan Investment Bonds amounting to Rs.100 million (2019: Rs. Rs. 100 million ) have been pledged with the National Clearing Company of Pakistan Limited (NCCPL) on account of removal of irrevocable undertaking as alternate option for collateral against participant's exposure in stock market.

## Notes To The Consolidated Financial Statements

For the year ended December 31, 2020

**10.8** Certain approved / Government securities are kept with the SBP to meet statutory liquidity requirements calculated on the basis of domestic demand and time liabilities.

**10.9** Investment of the Group in Adamjee Insurance Company Limited has been accounted for under the equity method of accounting in accordance with the treatment specified in International Accounting Standard 28, (IAS 28) 'Accounting for Investments in Associates'. The market value of the investment in Adamjee Insurance Company Limited as at December 31, 2020 amounted to Rs. 2,752.400 million. (2019: Rs. 2,946.300 million).

**Investment in Adamjee Insurance Company Limited under equity method - holding 20.00% (2019: 20%)**

|                                                               | 2020             | 2019      |
|---------------------------------------------------------------|------------------|-----------|
|                                                               | (Rupees in '000) |           |
| <b>Opening balance</b>                                        | 4,211,707        | 3,959,039 |
| Share of profit for the year before tax                       | 585,968          | 326,755   |
| Dividend from associate                                       | (192,500)        | (175,000) |
| Share of tax                                                  | (143,175)        | (109,675) |
|                                                               | 250,293          | 42,080    |
| Share of other comprehensive income                           | (26,925)         | 210,588   |
| Closing balance                                               | 4,435,075        | 4,211,707 |
| <b>Share of other comprehensive income</b>                    |                  |           |
| Share of unrealized (deficit) / surplus on assets -net of tax | (34,246)         | 167,219   |
| Share of exchange translation reserve of associate            | 7,321            | 43,369    |
|                                                               | (26,925)         | 210,588   |

**10.10** Investment of the Group in Euronet Pakistan Private Limited has been accounted for under the equity method of accounting in accordance with the treatment specified in International Accounting Standard 28, (IAS 28) 'Accounting for Investments in Associates'.

**Investment in Euronet Pakistan Private Limited under equity method - holding 30% (2019: 30.00%)**

|                                                  | 2020             | 2019    |
|--------------------------------------------------|------------------|---------|
|                                                  | (Rupees in '000) |         |
| Opening balance                                  | 63,951           | 60,487  |
| Share of (loss) / profit for the year before tax | (12,890)         | 12,878  |
| Share of tax                                     | (6,776)          | (9,414) |
| Closing balance                                  | (19,666)         | 3,464   |
|                                                  | 44,285           | 63,951  |

# Notes To The Consolidated Financial Statements

For the year ended December 31, 2020

## 10.11 Summarized financial information of associates

|                                                                              | Country of incorporation | % of interest held | Revenue    | Profit/(loss) after tax | Assets     | Liabilities |
|------------------------------------------------------------------------------|--------------------------|--------------------|------------|-------------------------|------------|-------------|
| (Rupees in '000)                                                             |                          |                    |            |                         |            |             |
| <b>2020</b>                                                                  |                          |                    |            |                         |            |             |
| <b>Associates</b>                                                            |                          |                    |            |                         |            |             |
| Euronet Pakistan (Private) Limited<br>(unaudited based on December 31, 2020) | Pakistan                 | 30%                | 718,076    | (59,342)                | 870,136    | 722,516     |
| Adamjee Insurance Company Limited<br>(unaudited based on September 30, 2020) | Pakistan                 | 20%                | 20,596,203 | 1,319,951               | 95,997,472 | 74,918,209  |
| <b>2019</b>                                                                  |                          |                    |            |                         |            |             |
| <b>Associates</b>                                                            |                          |                    |            |                         |            |             |
| Euronet Pakistan (Private) Limited<br>(unaudited based on December 31, 2019) | Pakistan                 | 30%                | 557,579    | 25,769                  | 648,477    | 435,306     |
| Adamjee Insurance Company Limited<br>(unaudited based on September 30, 2019) | Pakistan                 | 20%                | 19,551,861 | 1,108,984               | 82,967,479 | 63,892,816  |

## 11. ADVANCES

| Note                                        | Performing  |             | Non Performing |              | Total        |              |
|---------------------------------------------|-------------|-------------|----------------|--------------|--------------|--------------|
|                                             | 2020        | 2019        | 2020           | 2019         | 2020         | 2019         |
| (Rupees in '000)                            |             |             |                |              |              |              |
| Loans, cash credits, running finances, etc. | 444,022,138 | 471,613,945 | 50,524,753     | 48,759,157   | 494,546,891  | 520,373,102  |
| Islamic financing and related assets        | 84,205,962  | 50,965,243  | 756,471        | 381,427      | 84,962,433   | 51,346,670   |
| Bills discounted and purchased              | 18,192,157  | 19,486,758  | 664,294        | 665,102      | 18,856,451   | 20,151,860   |
| Advances - gross                            | 546,420,257 | 542,065,946 | 51,945,518     | 49,805,686   | 598,365,775  | 591,871,632  |
| Provision against advances                  |             |             |                |              |              |              |
| - Specific                                  | -           | -           | (45,168,351)   | (41,937,761) | (45,168,351) | (41,937,761) |
| - General                                   | (5,511,716) | (1,461,011) | -              | -            | (5,511,716)  | (1,461,011)  |
|                                             | (5,511,716) | (1,461,011) | (45,168,351)   | (41,937,761) | (50,680,067) | (43,398,772) |
| Advances - net of provision                 | 540,908,541 | 540,604,935 | 6,777,167      | 7,867,925    | 547,685,708  | 548,472,860  |

### 11.1 Includes net investment in finance lease as disclosed below:

|                                         | 2020                    |                                        |                |           | 2019                    |                                        |                |           |
|-----------------------------------------|-------------------------|----------------------------------------|----------------|-----------|-------------------------|----------------------------------------|----------------|-----------|
|                                         | Not later than one year | Late than one and less than five years | Over five year | Total     | Not later than one year | Late than one and less than five years | Over five year | Total     |
| (Rupees in '000)                        |                         |                                        |                |           |                         |                                        |                |           |
| Lease rentals receivable                | 2,022,558               | 1,835,337                              | 1,133,794      | 4,991,689 | 623,319                 | 2,500,339                              | 2,365,197      | 5,488,855 |
| Residual value                          | 20,428                  | 103,490                                | 23,039         | 146,957   | 14,769                  | 35,544                                 | 10,368         | 60,681    |
| Minimum lease payments                  | 2,042,986               | 1,938,827                              | 1,156,833      | 5,138,646 | 638,088                 | 2,535,883                              | 2,375,565      | 5,549,536 |
| Financial charges for future periods    | (99,749)                | (309,852)                              | (418,859)      | (828,460) | (136,416)               | (319,293)                              | (517,870)      | (973,579) |
| Present value of minimum lease payments | 1,943,237               | 1,628,975                              | 737,974        | 4,310,186 | 501,672                 | 2,216,590                              | 1,857,695      | 4,575,957 |

# Notes To The Consolidated Financial Statements

For the year ended December 31, 2020

|             |                                        | 2020             | 2019        |
|-------------|----------------------------------------|------------------|-------------|
|             |                                        | (Rupees in '000) |             |
| <b>11.2</b> | <b>Particulars of advances (Gross)</b> |                  |             |
|             | In local currency                      | 554,179,378      | 532,760,442 |
|             | In foreign currencies                  | 44,186,397       | 59,111,190  |
|             |                                        | 598,365,775      | 591,871,632 |

**11.3** Advances include Rs. 51,945.518 million (2019: Rs. 49,805.686 million) which have been placed under the non-performing status as detailed below:

|                                   | Note   | 2020                 |            | 2019                 |            |
|-----------------------------------|--------|----------------------|------------|----------------------|------------|
|                                   |        | Non performing loans | Provision  | Non performing loans | Provision  |
| (Rupees in '000)                  |        |                      |            |                      |            |
| <b>Category of Classification</b> |        |                      |            |                      |            |
| <b>Domestic</b>                   |        |                      |            |                      |            |
| Other Assets Especially           |        |                      |            |                      |            |
| Mentioned                         | 11.3.1 | 61,612               | 1,983      | 138,432              | 3,529      |
| Substandard                       |        | 309,191              | 60,382     | 591,832              | 146,872    |
| Doubtful                          |        | 459,053              | 137,341    | 3,048,946            | 1,346,099  |
| Loss                              |        | 42,671,220           | 41,498,157 | 37,836,484           | 37,088,134 |
|                                   |        | 43,501,076           | 41,697,863 | 41,615,694           | 38,584,634 |
| <b>Overseas</b>                   |        |                      |            |                      |            |
| Not past due but impaired         |        | -                    | -          | -                    | -          |
| Overdue by:                       |        | -                    | -          | -                    | -          |
| Upto 90 days                      |        | 5,321                | 4,913      | 10,688               | 7,400      |
| 91 to 180 days                    |        | 2,020                | 505        | 118,182              | 95,452     |
| 181 to 365 days                   |        | 19,961               | 9,981      | 141,231              | 137,601    |
| 65 days                           |        | 8,417,140            | 3,455,089  | 7,919,891            | 3,112,674  |
|                                   |        | 8,444,442            | 3,470,488  | 8,189,992            | 3,353,127  |
| Total                             |        | 51,945,518           | 45,168,351 | 49,805,686           | 41,937,761 |

**11.3.1** This represents non-performing portfolio of agricultural and small enterprise financing classified as OAEM as per the requirements of the Prudential Regulation for Agricultural and Small Enterprise Financing issued by the State Bank of Pakistan.

## 11.4 Particulars of provision against advances

|                      | Note   | 2020        |           |             | 2019        |           |             |
|----------------------|--------|-------------|-----------|-------------|-------------|-----------|-------------|
|                      |        | Specific    | General   | Total       | Specific    | General   | Total       |
| (Rupees in '000)     |        |             |           |             |             |           |             |
| Opening balance      |        | 41,937,761  | 1,461,011 | 43,398,772  | 41,944,267  | 1,292,113 | 43,236,380  |
| Exchange adjustments |        | 50,555      | 7,162     | 57,717      | 302,297     | 23,426    | 325,723     |
| Charge for the year  |        | 5,730,579   | 4,106,594 | 9,837,173   | 3,359,542   | 174,710   | 3,534,252   |
| Reversals            | 11.4.3 | (2,215,829) | (63,051)  | (2,278,880) | (3,649,841) | (29,238)  | (3,679,079) |
|                      |        | 3,514,750   | 4,043,543 | 7,558,293   | (290,299)   | 145,472   | (144,827)   |
| Amounts written off  | 11.5   | (334,715)   | -         | (334,715)   | (18,504)    | -         | (18,504)    |
| Closing balance      |        | 45,168,351  | 5,511,716 | 50,680,067  | 41,937,761  | 1,461,011 | 43,398,772  |

## Notes To The Consolidated Financial Statements

For the year ended December 31, 2020

### 11.4.1 Particulars of provision against advances

| Note                  | 2020       |           |            | 2019       |           |            |
|-----------------------|------------|-----------|------------|------------|-----------|------------|
|                       | Specific   | General   | Total      | Specific   | General   | Total      |
| (Rupees in '000)      |            |           |            |            |           |            |
| In local currency     | 41,697,863 | 5,189,680 | 46,887,543 | 38,244,450 | 1,120,827 | 39,365,277 |
| In foreign currencies | 3,470,488  | 322,036   | 3,792,524  | 3,693,311  | 340,184   | 4,033,495  |
|                       | 45,168,351 | 5,511,716 | 50,680,067 | 41,937,761 | 1,461,011 | 43,398,772 |

**11.4.2** State Bank of Pakistan vide BSD Circular No. 2 dated January 27, 2009, BSD Circular No. 10 dated October 20, 2009, BSD Circular No. 02 of 2010 dated June 03, 2010 and BSD Circular No.1 of 2011 dated October 21, 2011 has allowed benefit of forced sale value (FSV) of Plant and Machinery under charge, pledged stock and mortgaged residential, commercial and industrial properties (land and building only) held as collateral against NPLs for five years from the date of classification. The Bank (holding company) has not taken the FSV benefit in calculation of specific provision. However, one of the subsidiaries of the Bank has availed benefit of forced sale values amounting to Rs. 543.151 million (December 31, 2019: Rs. 178.374 million) in determining the provisioning against non-performing Islamic financing and related assets as at December 31, 2020. The additional benefit on the Bank's statement of profit and loss arising from availing the FSV benefit - net of tax amounts to Rs. 353.048 million as at December 31, 2020 (December 31, 2019: Rs. 115.943 million). However, the additional impact on profitability arising from availing the benefit of forced sales value is not available for payment of cash or stock dividends to shareholders.

**11.4.3** This includes reversal of provisions and reduction of non-performing loans amounting to Rs. 84 million (2019: Rs. NIL) as a result of settlement on debt asset swap arrangement with customers.

**11.4.4** General provision against consumer loans represents provision maintained against fully secured performing portfolio and unsecured performing portfolio as required by the Prudential Regulations issued by the SBP. General provision against Small Enterprise Finance represents provision maintained at an amount equal to 1% of unsecured performing portfolio as required by the Prudential Regulations issued by the SBP. General provisions pertaining to overseas advances are made in accordance with the requirements of the regulatory authorities of the respective countries in which the overseas branches operate.

In addition, the Group has also maintained a general provision of Rs. 4,564.689 million (December 31, 2019: Rs. 527 million) against financing made on prudent basis. This general provision is in addition to the requirements of Prudential Regulations. Refer note 5 to these consolidated financial statements.

| Note          | 2020                                      |      | 2019    |        |
|---------------|-------------------------------------------|------|---------|--------|
|               | (Rupees in '000)                          |      |         |        |
| <b>11.5</b>   | <b>PARTICULARS OF WRITE OFFS:</b>         |      |         |        |
| <b>11.5.1</b> | Against Provisions                        | 11.4 | 334,715 | 18,504 |
|               | Directly charged to Profit & Loss account |      | –       | –      |
|               |                                           |      | 334,715 | 18,504 |
| <b>11.5.2</b> | Write Offs of Rs. 500,000 and above       |      |         |        |
|               | - Domestic                                | 11.6 | 299,532 | 14,613 |
|               | - Overseas                                |      | –       | 2,725  |
|               | Write Offs of below Rs. 500,000           |      | 35,183  | 1,166  |
|               |                                           |      | 334,715 | 18,504 |

# Notes To The Consolidated Financial Statements

For the year ended December 31, 2020

## 11.6 DETAILS OF LOAN WRITE OFF OF Rs. 500,000/- AND ABOVE

In terms of sub-section (3) of Section 33A of the Banking Companies Ordinance, 1962, the statement in respect of written-off loans or any other financial relief of Rupees five hundred thousand or above allowed to a person(s) during the year ended December 31, 2020 is given at Annexure- I of unconsolidated financial statements. However, this write off does not affect the Bank's right to recover the debts from these customers.

|                                      | Note | 2020<br>(Rupees in '000) | 2019              |
|--------------------------------------|------|--------------------------|-------------------|
| <b>12. FIXED ASSETS</b>              |      |                          |                   |
| Capital work-in-progress             | 12.1 | 871,274                  | 1,068,429         |
| Property and equipment               | 12.2 | 53,190,768               | 52,466,540        |
| Right-of-use assets                  | 12.3 | 9,617,270                | 10,666,838        |
|                                      |      | <b>63,679,312</b>        | <b>64,201,807</b> |
| <b>12.1 Capital work-in-progress</b> |      |                          |                   |
| Civil works                          |      | 472,314                  | 476,799           |
| Equipment                            |      | 98,383                   | 90,946            |
| Advances to suppliers                |      | 296,456                  | 491,968           |
| Others                               |      | 4,121                    | 8,716             |
|                                      |      | <b>871,274</b>           | <b>1,068,429</b>  |

## 12.2 Property and Equipment

|                                              | 2020             |                |                           |                            |                        |                                           |           |                        |              |
|----------------------------------------------|------------------|----------------|---------------------------|----------------------------|------------------------|-------------------------------------------|-----------|------------------------|--------------|
|                                              | Freehold land    | Leasehold land | Building on freehold land | Building on leasehold land | Furniture and fixtures | Electrical, office and computer equipment | Vehicles  | Leasehold improvements | Total        |
|                                              | (Rupees in '000) |                |                           |                            |                        |                                           |           |                        |              |
| <b>At January 1, 2020</b>                    |                  |                |                           |                            |                        |                                           |           |                        |              |
| Cost / Revalued amount                       | 26,951,665       | 2,893,079      | 14,400,594                | 637,102                    | 2,047,789              | 15,989,634                                | 1,176,389 | 1,352,983              | 65,449,235   |
| Accumulated depreciation                     | -                | -              | (236)                     | -                          | (1,159,800)            | (10,690,712)                              | (643,336) | (488,611)              | (12,982,695) |
| Net book value                               | 26,951,665       | 2,893,079      | 14,400,358                | 637,102                    | 887,989                | 5,298,922                                 | 533,053   | 864,372                | 52,466,540   |
| <b>Year ended December 31, 2020</b>          |                  |                |                           |                            |                        |                                           |           |                        |              |
| Opening net book value                       | 26,951,665       | 2,893,079      | 14,400,358                | 637,102                    | 887,989                | 5,298,922                                 | 533,053   | 864,372                | 52,466,540   |
| Additions                                    | 189,607          | 6,999          | 976,836                   | 168,601                    | 228,078                | 1,174,108                                 | 60,767    | 443,560                | 3,248,556    |
| Disposals                                    | -                | -              | (85,546)                  | -                          | (2,579)                | (6,910)                                   | (23,938)  | (1,300)                | (120,273)    |
| Depreciation charge                          | -                | -              | (498,884)                 | (28,597)                   | (172,075)              | (1,345,944)                               | (125,219) | (232,501)              | (2,403,220)  |
| Impairment                                   | -                | -              | -                         | -                          | (870)                  | (561)                                     | -         | (2,838)                | (4,269)      |
| Exchange rate adjustments                    | -                | -              | 412                       | 691                        | 773                    | 1,294                                     | 1,987     | (1,723)                | 3,434        |
| Transfers                                    | -                | -              | (17,242)                  | -                          | 61                     | (61)                                      | -         | 17,242                 | -            |
| Closing net book value                       | 27,141,272       | 2,900,078      | 14,775,934                | 777,797                    | 941,377                | 5,120,848                                 | 446,650   | 1,086,812              | 53,190,768   |
| <b>At December 31, 2020</b>                  |                  |                |                           |                            |                        |                                           |           |                        |              |
| Cost / Revalued amount                       | 27,141,272       | 2,900,078      | 15,273,596                | 806,387                    | 2,239,957              | 16,995,598                                | 1,120,324 | 1,775,260              | 68,252,472   |
| Accumulated depreciation                     | -                | -              | (497,662)                 | (28,590)                   | (1,297,854)            | (11,874,750)                              | (673,674) | (681,889)              | (15,054,419) |
| Accumulated Impairment                       | -                | -              | -                         | -                          | (726)                  | -                                         | -         | (6,559)                | (7,285)      |
| Net book value                               | 27,141,272       | 2,900,078      | 14,775,934                | 777,797                    | 941,377                | 5,120,848                                 | 446,650   | 1,086,812              | 53,190,768   |
| Rate of depreciation / estimated useful life | -                | -              | Upto 60 years             | Upto 50 years              | 10%                    | 10%-25%                                   | 20%       | Lease term             | -            |

# Notes To The Consolidated Financial Statements

For the year ended December 31, 2020

|                                                        | 2019          |                |                           |                            |                        |                                           |           |                        | Total        |
|--------------------------------------------------------|---------------|----------------|---------------------------|----------------------------|------------------------|-------------------------------------------|-----------|------------------------|--------------|
|                                                        | Freehold land | Leasehold land | Building on freehold land | Building on leasehold land | Furniture and fixtures | Electrical, office and computer equipment | Vehicles  | Leasehold improvements |              |
| (Rupees in '000)                                       |               |                |                           |                            |                        |                                           |           |                        |              |
| <b>At January 1, 2019</b>                              |               |                |                           |                            |                        |                                           |           |                        |              |
| Cost / Revalued amount                                 | 20,287,003    | 2,440,151      | 12,602,260                | 563,273                    | 1,831,107              | 15,115,272                                | 1,231,531 | 870,429                | 54,941,026   |
| Accumulated depreciation                               | -             | -              | (881,516)                 | (116,820)                  | (1,025,554)            | (9,887,641)                               | (638,772) | (361,128)              | (12,911,431) |
| Net book value                                         | 20,287,003    | 2,440,151      | 11,720,744                | 446,453                    | 805,553                | 5,227,631                                 | 592,759   | 509,301                | 42,029,595   |
| <b>Year ended December 31, 2019</b>                    |               |                |                           |                            |                        |                                           |           |                        |              |
| Opening net book value                                 | 20,287,003    | 2,440,151      | 11,720,744                | 446,453                    | 805,553                | 5,227,631                                 | 592,759   | 509,301                | 42,029,595   |
| Additions                                              | 806,735       | -              | 1,989,250                 | 142,646                    | 237,979                | 1,414,512                                 | 123,397   | 536,351                | 5,250,870    |
| Movement in surplus on assets revalued during the year | 5,840,577     | 452,928        | 1,073,211                 | 73,227                     | -                      | -                                         | -         | -                      | 7,439,943    |
| Transfer from Non-Banking assets                       | 34,000        | -              | 17,520                    | -                          | -                      | -                                         | -         | -                      | 51,520       |
| Disposal                                               | (21,000)      | -              | -                         | -                          | (6,202)                | (5,101)                                   | (40,683)  | (31,212)               | (104,198)    |
| Depreciation charge                                    | -             | -              | (417,054)                 | (27,778)                   | (151,530)              | (1,346,139)                               | (146,347) | (144,160)              | (2,233,008)  |
| Exchange rate adjustments                              | -             | -              | 9,566                     | 2,554                      | 3,438                  | 6,770                                     | 3,927     | 5,563                  | 31,818       |
| Transfers                                              | 4,350         | -              | 7,121                     | -                          | (1,249)                | 1,249                                     | -         | (11,471)               | -            |
| Closing net book value                                 | 26,951,665    | 2,893,079      | 14,400,358                | 637,102                    | 887,989                | 5,298,922                                 | 533,053   | 864,372                | 52,466,540   |
| <b>At December 31, 2019</b>                            |               |                |                           |                            |                        |                                           |           |                        |              |
| Cost / Revalued amount                                 | 26,951,665    | 2,893,079      | 14,400,594                | 637,102                    | 2,047,789              | 15,989,634                                | 1,176,389 | 1,352,983              | 65,449,235   |
| Accumulated depreciation                               | -             | -              | (236)                     | -                          | (1,159,800)            | (10,690,712)                              | (643,336) | (488,611)              | (12,982,695) |
| Net book value                                         | 26,951,665    | 2,893,079      | 14,400,358                | 637,102                    | 887,989                | 5,298,922                                 | 533,053   | 864,372                | 52,466,540   |
| Rate of depreciation / estimated useful life           | -             | -              | Upto 60 years             | Upto 50 years              | 10%                    | 10%-25%                                   | 20%       | Lease term             | -            |

**12.2.1** Leasehold land include a plot of land measuring 3,120.46 square yards having book value of Rs. 1,419.809 million situated at Railway Quarters, I.I. Chundrigar Road, Karachi, (the "Plot"), where a tenant is claiming for the possession as tenant of an insignificant area of only 18 square feet of the plot, however there is no issue over the title of the subject property. Both the Constitutional Petitions filed by the Group have been dismissed by the Sindh High Court on 28 January 2016 against the Group. The Group has filed an appeal before the Supreme Court of Pakistan.

**12.2.2** The land and buildings of the Group were revalued as at December 31, 2019 by independent valuers (K.G. Traders (Pvt) Limited, Tristar International Consultant (Pvt) Limited & Sardar Enterprises), valuation and engineering consultants, on the basis of market value. The total surplus against revaluation of fixed assets as at December 31, 2020 amounts to Rs. 20,856.881 million.

**12.2.3** Had the land and buildings not been revalued, the total carrying amounts of revalued properties as at December 31, 2020 would have been as follows:

|           | (Rupees in '000) |
|-----------|------------------|
| Land      | 13,007,065       |
| Buildings | 11,731,135       |

**12.2.4** The gross carrying amount (cost) of fully depreciated assets that are still in use are as follows:

|                                            | (Rupees in '000) |
|--------------------------------------------|------------------|
| Furniture and fixtures                     | 608,625          |
| Electrical, computers and office equipment | 7,347,691        |
| Vehicles                                   | 488,175          |
| Lease Hold Improvements                    | 35,697           |

## Notes To The Consolidated Financial Statements

For the year ended December 31, 2020

**12.2.5** Carrying amount of temporarily idle property of the Group is Rs. 436.136 million (2019: Rs. 161.886 million)

**12.2.6** The information relating to disposal of operating fixed assets to related parties is given in Annexure I of these consolidated financial statements.

**12.3** Movement in right-of-use assets is as follows:

|                                                                                                                                     | Note | 2020<br>(Rupees in '000) | 2019<br>(Rupees in '000) |
|-------------------------------------------------------------------------------------------------------------------------------------|------|--------------------------|--------------------------|
| Opening balance                                                                                                                     |      | 10,666,838               | 11,392,795               |
| Additions / Adjustments                                                                                                             |      | 1,263,307                | 884,936                  |
| Derecognition                                                                                                                       |      | (615,049)                | –                        |
| Depreciation charge                                                                                                                 | 31   | (1,697,826)              | (1,610,893)              |
| Closing net book value                                                                                                              |      | 9,617,270                | 10,666,838               |
| <b>13. INTANGIBLE ASSETS</b>                                                                                                        |      |                          |                          |
| Capital work-in-progress                                                                                                            |      | 435,330                  | 472,336                  |
| Goodwill                                                                                                                            |      | 82,127                   | 82,127                   |
| Management rights                                                                                                                   |      | 192,000                  | 192,000                  |
| Computer software                                                                                                                   | 13.1 | 1,157,787                | 1,232,512                |
|                                                                                                                                     |      | 1,867,244                | 1,978,975                |
| <b>Computer software</b>                                                                                                            |      |                          |                          |
| <b>13.1 At January 1</b>                                                                                                            |      |                          |                          |
| Cost                                                                                                                                |      | 4,865,584                | 4,114,222                |
| Accumulated amortisation                                                                                                            |      | (3,633,072)              | (3,193,692)              |
| Net book value                                                                                                                      |      | 1,232,512                | 920,530                  |
| <b>Year ended December 31</b>                                                                                                       |      |                          |                          |
| Opening net book value                                                                                                              |      | 1,232,512                | 920,530                  |
| Additions                                                                                                                           |      | 395,186                  | 734,933                  |
| Amortisation charge                                                                                                                 | 31   | (469,860)                | (425,585)                |
| Exchange rate adjustments                                                                                                           |      | (51)                     | 2,634                    |
| Closing net book value                                                                                                              |      | 1,157,787                | 1,232,512                |
| <b>At December 31</b>                                                                                                               |      |                          |                          |
| Cost                                                                                                                                |      | 5,262,979                | 4,865,584                |
| Accumulated amortisation and impairment                                                                                             |      | (4,105,192)              | (3,633,072)              |
| Net book value                                                                                                                      |      | 1,157,787                | 1,232,512                |
| Rate of amortisation (percentage)                                                                                                   |      | 14% to 33.33%            | 14% to 33.33%            |
| Useful life                                                                                                                         |      | 3 - 7 years              | 3 - 7 years              |
| <b>13.2</b> The gross carrying amount (cost) of fully depreciated intangible assets that are still in use is Rs. 3,085.368 million. |      |                          |                          |



# Notes To The Consolidated Financial Statements

For the year ended December 31, 2020

|                                                                                   | Note | 2020<br>(Rupees in '000) | 2019       |
|-----------------------------------------------------------------------------------|------|--------------------------|------------|
| <b>14. OTHER ASSETS</b>                                                           |      |                          |            |
| Income/ mark-up accrued in local currency                                         |      | 19,451,779               | 24,533,964 |
| Income/ mark-up accrued in foreign currencies                                     |      | 311,024                  | 564,667    |
| Advances, deposits, advance rent and other prepayments                            |      | 2,524,851                | 3,940,446  |
| Compensation for delayed income tax refunds                                       |      | 133,809                  | 133,809    |
| Non-banking assets acquired in satisfaction of claims                             | 14.1 | 3,277,778                | 3,251,508  |
| Branch adjustment account                                                         |      | 421,204                  | 77,281     |
| Mark to market gain on forward foreign exchange contracts                         |      | 4,847,284                | 3,848,188  |
| Unrealized gain on derivative financial instruments                               | 25   | 517,033                  | 1,236,517  |
| Acceptances                                                                       | 20   | 22,747,369               | 20,346,205 |
| Receivable from the pension fund                                                  | 38.4 | 3,370,179                | 3,605,121  |
| Others                                                                            |      | 6,919,936                | 10,118,430 |
|                                                                                   |      | 64,522,246               | 71,656,136 |
| Less: Provision held against other assets                                         | 14.2 | 2,582,686                | 2,604,137  |
| Other Assets (net of provision)                                                   |      | 61,939,560               | 69,051,999 |
| Surplus on revaluation of non-banking assets acquired in satisfaction of claims   |      | 854,231                  | 677,660    |
| Other Assets - total                                                              |      | 62,793,791               | 69,729,659 |
| <b>14.1</b> Market value of Non-banking assets acquired in satisfaction of claims |      | 4,036,914                | 3,838,230  |

Non-banking assets acquired in satisfaction of claims of the Bank are revalued as at December 31, 2020 by independent valuers (Tristar International Consultant, Design Crafts, Material Design Services, Pee Dee & Associates and J&M Associates) on the basis of market value.

|                                                                                         | Note     | 2020<br>(Rupees in '000) | 2019      |
|-----------------------------------------------------------------------------------------|----------|--------------------------|-----------|
| <b>14.1.1 Non-banking assets acquired in satisfaction of claims</b>                     |          |                          |           |
| Opening balance                                                                         |          | 3,838,230                | 4,035,114 |
| Additions                                                                               |          | 84,000                   | 64,445    |
| Revaluation                                                                             |          | 183,915                  | 255,040   |
| Disposals                                                                               |          | (35,024)                 | (428,052) |
| Depreciation                                                                            |          | (30,049)                 | (45,456)  |
| (Charge) / reversal of impairment                                                       |          | (4,158)                  | 8,659     |
| Transfer to fixed assets                                                                |          | -                        | (51,520)  |
| Closing balance                                                                         |          | 4,036,914                | 3,838,230 |
| <b>14.1.2 Gain on disposal of non-banking assets acquired in satisfaction of claims</b> |          |                          |           |
| Disposal proceeds                                                                       |          | 39,000                   | 540,000   |
| Less                                                                                    |          |                          |           |
| - Cost                                                                                  |          | 35,820                   | 433,813   |
| - Depreciation                                                                          |          | (796)                    | (5,761)   |
|                                                                                         |          | 35,024                   | 428,052   |
| Gain                                                                                    | 14.1.2.1 | 3,976                    | 111,948   |

# Notes To The Consolidated Financial Statements

For the year ended December 31, 2020

| Note                                                                         | 2020<br>(Rupees in '000) | 2019      |
|------------------------------------------------------------------------------|--------------------------|-----------|
| <b>14.1.2.1 Breakup of gain/loss realized on sale of non-banking assets:</b> |                          |           |
| Commercial property Rawalpindi                                               | 3,976                    | –         |
| Industrial property Lahore                                                   | –                        | 111,948   |
|                                                                              | 3,976                    | 111,948   |
| <b>14.2 Provision held against other assets</b>                              |                          |           |
| Non banking assets acquired in satisfaction of claims                        | 95,095                   | 90,938    |
| Others                                                                       | 2,487,591                | 2,513,199 |
|                                                                              | 2,582,686                | 2,604,137 |
| <b>14.2.1 Movement in provision held against other assets</b>                |                          |           |
| Opening balance                                                              | 2,604,137                | 2,550,585 |
| Charge for the year                                                          | 54,269                   | 12,587    |
| Reversals                                                                    | (77,917)                 | (36,023)  |
|                                                                              | (23,648)                 | (23,436)  |
| Amount written off                                                           | (16,591)                 | (3,638)   |
| Exchange and other adjustments                                               | 18,788                   | 80,626    |
| Closing balance                                                              | 2,582,686                | 2,604,137 |

## 15. CONTINGENT ASSETS

There were no contingent assets of the Group as at December 31, 2020 (2019: NIL).

| Note                                                         | 2020<br>(Rupees in '000) | 2019       |
|--------------------------------------------------------------|--------------------------|------------|
| <b>16. BILLS PAYABLE</b>                                     |                          |            |
| In Pakistan                                                  | 26,383,624               | 12,759,834 |
| Outside Pakistan                                             | 67,889                   | 35,491     |
|                                                              | 26,451,513               | 12,795,325 |
| <b>17. BORROWINGS</b>                                        |                          |            |
| <b>Secured</b>                                               |                          |            |
| Borrowings from State Bank of Pakistan                       |                          |            |
| Under export refinance scheme                                | 17.1 37,844,720          | 36,513,083 |
| Under long term financing facility                           | 17.2 22,596,183          | 18,138,200 |
| Under renewable energy performance platform                  | 17.3 74,760              | 85,062     |
| Refinance Scheme for wages and salaries                      | 17.4 11,789,824          | –          |
| Temporary economic refinance facility                        | 17.5 2,878,487           | –          |
| Under financing facility for storage of agricultural produce | 17.6 191,254             | 188,809    |
|                                                              | 75,375,228               | 54,925,154 |
| Repurchase agreement borrowings                              | 17.7 92,225,530          | 28,099,229 |
| <b>Total secured</b>                                         | 167,600,758              | 83,024,383 |
| <b>Unsecured</b>                                             |                          |            |
| Borrowings from other financial institution                  | 17.8 1,720,341           | 889,161    |
| Call borrowings                                              | 17.9 319,669             | 5,964,830  |
| Overdrawn nostro accounts                                    | 368,920                  | 1,342,603  |
| Musharaka arrangements                                       | 17.10 14,405,366         | 1,476,705  |
| Others                                                       | 162,286                  | 162,286    |
| <b>Total unsecured</b>                                       | 16,976,582               | 9,835,585  |
|                                                              | 17.11 184,577,340        | 92,859,968 |

## Notes To The Consolidated Financial Statements

For the year ended December 31, 2020

- 17.1** The Group has entered into agreements for financing with the State Bank of Pakistan (SBP) for extending export finance to customers. As per the agreements, the Group has granted SBP the right to recover the outstanding amount from the Group at the date of maturity of the finance by directly debiting the current account maintained by the Bank with SBP. These borrowings are repayable within six months. These carry mark up rates ranging from 1.0% to 2.0% per annum.
- 17.2** These borrowings have been obtained from the SBP for providing financing facilities to exporters for adoption of new technologies and modernization of their plant and machinery. These borrowings are repayable within a period ranging from 3 years to 10 years. These carry mark up rates ranging from 2.0% to 3.50% per annum.
- 17.3** These borrowings have been obtained from the SBP for providing financing facilities to customers against renewable energy projects. These borrowings are repayable within a period of twelve years with two years grace period from date of disbursement. These carry mark up rate of 2% per annum.
- 17.4** These borrowings have been obtained from the SBP for providing financing facilities to help businesses in payment of wages and salaries to their workers and employees for supporting continued employment. These borrowing are repayable in 8 equal quarterly instalments beginning from January 2021. These carry mark up rates ranging from 0% to 2% per annum.
- 17.5** These borrowings have been obtained from the SBP for providing concessionary refinancing facility to the industry for purchase of new imported and locally manufactured plant & machinery to set up new projects. These borrowings are repayable within a period of ten years including a grace period of upto 2 years. These carry mark up rate of 1% per annum.
- 17.6** These borrowings have been obtained from SBP under "Financing Facility for Storage of Agricultural Produce (FFSAP)" to encourage Private Sector to establish Silos, Warehouses and Cold Storages. These borrowings are repayable within a period ranging from 3 years to 10 years. These carry mark up rates ranging from 2.50% to 3.50% per annum.
- 17.7** These carry mark-up rates ranging from 6.15% to 7.25% per annum (2019:8.0% to 13.20% per annum) and are secured against government securities of carrying value of Rs. 92,279.556 million (2019: Rs. 28,136.434 million). These are repayable latest by February 2021.
- 17.8** These carry mark-up rates ranging from 1.90% to 4.00% per annum (2019: 2.75% to 3.00% per annum). These are repayable latest by August 2022.
- 17.9** These carry mark-up at the rate of 1.15% per annum (2019: 2.30% to 13.10%per annum). These are repayable by January 2021.
- 17.10** These carry mark-up ranging from 6.7% to 7.2% per annum (2019: 8.5% to 9.0% per annum). These are repayable by March 2021.

|                                                                   | 2020             | 2019       |
|-------------------------------------------------------------------|------------------|------------|
|                                                                   | (Rupees in '000) |            |
| <b>17.11 Particulars of borrowings with respect to currencies</b> |                  |            |
| In local currency                                                 | 182,091,272      | 88,699,245 |
| In foreign currencies                                             | 2,486,068        | 4,160,723  |
|                                                                   | 184,577,340      | 92,859,968 |

# Notes To The Consolidated Financial Statements

For the year ended December 31, 2020

## 18. DEPOSITS AND OTHER ACCOUNTS

|                               | 2020              |                       |               | 2019              |                       |               |
|-------------------------------|-------------------|-----------------------|---------------|-------------------|-----------------------|---------------|
|                               | In local currency | In foreign currencies | Total         | In local currency | In foreign currencies | Total         |
| (Rupees in '000)              |                   |                       |               |                   |                       |               |
| <b>Customers</b>              |                   |                       |               |                   |                       |               |
| Current deposits              | 425,760,845       | 55,999,023            | 481,759,868   | 357,303,848       | 53,340,189            | 410,644,037   |
| Savings deposits              | 689,241,146       | 47,759,213            | 737,000,359   | 583,751,817       | 47,420,170            | 631,171,987   |
| Term deposits                 | 89,353,999        | 14,182,837            | 103,536,836   | 100,346,882       | 15,590,901            | 115,937,783   |
| Others                        | 26,013,457        | 3,218,232             | 29,231,689    | 26,456,179        | 2,854,010             | 29,310,189    |
|                               | 1,230,369,447     | 121,159,305           | 1,351,528,752 | 1,067,858,726     | 119,205,270           | 1,187,063,996 |
| <b>Financial Institutions</b> |                   |                       |               |                   |                       |               |
| Current deposits              | 11,033,694        | 659,230               | 11,692,924    | 9,520,075         | 2,094,703             | 11,614,778    |
| Savings deposits              | 16,530,222        | 117,569               | 16,647,791    | 14,992,263        | 27,986                | 15,020,249    |
| Term deposits                 | 4,557,468         | 4,090,613             | 8,648,081     | 4,959,099         | 7,741,444             | 12,700,543    |
| Others                        | -                 | 220,413               | 220,413       | -                 | 193,459               | 193,459       |
|                               | 32,121,384        | 5,087,825             | 37,209,209    | 29,471,437        | 10,057,592            | 39,529,029    |
|                               | 1,262,490,831     | 126,247,130           | 1,388,737,961 | 1,097,330,163     | 129,262,862           | 1,226,593,025 |

|             |                                       | 2020             | 2019          |
|-------------|---------------------------------------|------------------|---------------|
|             |                                       | (Rupees in '000) |               |
| <b>18.1</b> | Composition of deposits               |                  |               |
|             | - Individuals                         | 873,722,061      | 751,908,455   |
|             | - Government (Federal and Provincial) | 60,113,810       | 73,275,909    |
|             | - Public Sector Entities              | 87,102,803       | 52,949,106    |
|             | - Banking Companies                   | 4,893,635        | 10,219,893    |
|             | - Non-Banking Financial Institutions  | 32,298,388       | 29,285,707    |
|             | - Private Sector                      | 330,607,264      | 308,953,955   |
|             |                                       | 1,388,737,961    | 1,226,593,025 |

**18.2** Deposits and other accounts include deposits eligible to be covered under the Deposits Protection insurance arrangements amounting to Rs 957,118.596 million (2019: Rs 802,238.351 million).

# Notes To The Consolidated Financial Statements

For the year ended December 31, 2020

## 19. DEFERRED TAX LIABILITIES

|                                                    |      | 2020                   |                          |                      |                         |
|----------------------------------------------------|------|------------------------|--------------------------|----------------------|-------------------------|
|                                                    |      | At January<br>01, 2020 | Recognised in<br>P&L A/C | Recognised in<br>OCI | At December<br>01, 2020 |
| Note                                               |      | (Rupees in '000)       |                          |                      |                         |
| <b>Taxable Temporary Differences on</b>            |      |                        |                          |                      |                         |
| - Surplus on revaluation of fixed assets           | 23.1 | 1,390,542              | (61,031)                 | -                    | 1,329,511               |
| - Surplus on revaluation of<br>Non-banking assets  | 23.2 | 237,181                | (2,570)                  | 64,371               | 298,982                 |
| - Accelerated tax depreciation                     |      | 1,961,113              | 93,396                   | -                    | 2,054,509               |
| - Receivable from pension fund                     |      | 1,261,793              | 119,428                  | (201,659)            | 1,179,562               |
| - Business combination                             |      | 705,218                | -                        | -                    | 705,218                 |
| - Investments in associated undertaking            |      | 1,247,340              | 87,603                   | (9,423)              | 1,325,520               |
| - Surplus/deficit on revaluation<br>of investments | 23   | 2,329,519              | -                        | 2,193,979            | 4,523,498               |
|                                                    |      | 9,132,706              | 236,826                  | 2,047,268            | 11,416,800              |
| <b>Deductible Temporary Differences on</b>         |      |                        |                          |                      |                         |
| - Tax losses carried forward                       | 19.1 | (949,800)              | 177,443                  | -                    | (772,357)               |
| - Provision against advances                       |      | (1,726,151)            | (1,060,705)              | -                    | (2,786,856)             |
| - Others                                           |      | (242,532)              | (124,015)                | -                    | (366,547)               |
|                                                    |      | (2,918,483)            | (1,007,277)              | -                    | (3,925,760)             |
|                                                    |      | 6,214,223              | (770,451)                | 2,047,268            | 7,491,040               |
|                                                    |      | 2019                   |                          |                      |                         |
|                                                    |      | At January<br>01, 2019 | Recognised in<br>P&L A/C | Recognised in<br>OCI | At December<br>01, 2019 |
| Note                                               |      | (Rupees in '000)       |                          |                      |                         |
| <b>Taxable Temporary Differences on</b>            |      |                        |                          |                      |                         |
| - Surplus on revaluation of fixed assets           | 23.1 | 1,018,502              | (29,214)                 | 401,254              | 1,390,542               |
| - Surplus on revaluation of<br>non-banking assets  | 23.2 | 168,305                | (20,388)                 | 89,264               | 237,181                 |
| - Accelerated tax depreciation                     |      | 1,810,834              | 150,279                  | -                    | 1,961,113               |
| - Receivable from pension fund                     |      | 1,335,309              | 155,621                  | (229,137)            | 1,261,793               |
| - Business combination                             |      | 705,218                | -                        | -                    | 705,218                 |
| - Investments in associated undertaking            |      | 1,158,906              | 14,728                   | 73,706               | 1,247,340               |
| - Surplus/deficit on revaluation<br>of investments | 23   | -                      | -                        | 2,329,519            | 2,329,519               |
|                                                    |      | 6,197,074              | 271,026                  | 2,664,606            | 9,132,706               |
| <b>Deductible Temporary Differences on</b>         |      |                        |                          |                      |                         |
| - Tax losses carried forward                       | 19.1 | (818,652)              | (131,148)                | -                    | (949,800)               |
| - Provision against advances                       |      | (1,791,768)            | 65,617                   | -                    | (1,726,151)             |
| - Others                                           |      | (92,755)               | (149,777)                | -                    | (242,532)               |
| - Surplus/deficit on revaluation<br>of investments |      | (1,510,754)            | -                        | 1,510,754            | -                       |
|                                                    |      | (4,213,929)            | (215,308)                | 1,510,754            | (2,918,483)             |
|                                                    |      | 1,983,145              | 55,718                   | 4,175,360            | 6,214,223               |

## Notes To The Consolidated Financial Statements

For the year ended December 31, 2020

- 19.1** This includes deferred tax asset recorded on unused tax losses and minimum tax of one of the subsidiaries of the Group. The subsidiary's management, based on their internal projections / assessment of future taxable profits, believes that the subsidiary will be able to achieve sufficient taxable profits and tax liability in future to adjust unused tax losses and minimum tax before their expiry and accordingly has recorded the deferred tax asset on such basis. Tax losses and minimum tax have expiry dates between 2023 to 2025.

| Note                                                      | 2020<br>(Rupees in '000) | 2019               |
|-----------------------------------------------------------|--------------------------|--------------------|
| <b>20. OTHER LIABILITIES</b>                              |                          |                    |
| Mark-up/ return/ interest payable in local currency       | 2,884,255                | 23,511,019         |
| Mark-up/ return/ interest payable in foreign currencies   | 254,433                  | 664,130            |
| Unearned commission and income on bills discounted        | 252,312                  | 252,842            |
| Accrued expenses                                          | 6,888,435                | 6,310,392          |
| Provision for taxation ( provisions less payments)        | 10,130,229               | 6,045,948          |
| Workers' welfare fund                                     | 20.1<br>8,838,684        | 7,873,706          |
| Acceptances                                               | 14<br>22,747,369         | 20,346,205         |
| Unclaimed/dividend payable                                | 1,697,408                | 1,605,123          |
| Mark to market loss on forward foreign exchange contracts | 4,618,138                | 4,638,011          |
| Unrealized loss on derivative financial instruments       | 25<br>513,343            | 1,232,806          |
| Staff welfare fund                                        | 5,598                    | 5,727              |
| Provision for employees' compensated absences             | 38.4<br>919,407          | 939,495            |
| Provision for post retirement medical benefits            | 38.4<br>2,004,122        | 1,921,348          |
| Provision for employees' contributory benevolent scheme   | 38.4<br>222,084          | 221,193            |
| Retention money                                           | 20,657                   | 20,657             |
| Insurance payable against consumer assets                 | 698,949                  | 655,146            |
| Unclaimed balances                                        | 877,552                  | 993,105            |
| Duties and taxes payable                                  | 1,860,730                | 775,694            |
| Charity fund balance                                      | 46,615                   | 54,782             |
| Provision against off-balance sheet obligations           | 46,188                   | 46,581             |
| Security deposits against lease                           | 1,283,999                | 1,497,296          |
| Lease liability against right of use assets               | 11,268,508               | 11,436,633         |
| Others                                                    | 12,948,143               | 11,357,674         |
|                                                           | <b>91,027,158</b>        | <b>102,405,513</b> |

- 20.1** Supreme Court of Pakistan vide its order dated November 10, 2016 has held that the amendments made in the law introduced by the Federal Government for the levy of Workers Welfare Fund were not lawful. The Federal Board of Revenue has filed review petitions against this order which are currently pending.

Legal advice obtained on the matter indicates that consequent to filing of these review petitions the judgment may not currently be treated as conclusive. Accordingly, the Bank maintained its provision in respect of WWF.

### 21. SHARE CAPITAL

#### 21.1 Authorized Capital

|  | 2020<br>(Number of shares) | 2019          |                                | 2020<br>(Rupees in '000) | 2019       |
|--|----------------------------|---------------|--------------------------------|--------------------------|------------|
|  | 1,500,000,000              | 1,500,000,000 | Ordinary shares of Rs. 10 each | 15,000,000               | 15,000,000 |

## Notes To The Consolidated Financial Statements

For the year ended December 31, 2020

### 21.2 Issued, subscribed and paid up

| 2020<br>(Number of shares) |                      | 2019<br>(Number of shares)               |  | 2020<br>(Rupees in '000) |                   | 2019<br>(Rupees in '000) |  |
|----------------------------|----------------------|------------------------------------------|--|--------------------------|-------------------|--------------------------|--|
| <b>Ordinary shares</b>     |                      |                                          |  |                          |                   |                          |  |
| 197,253,795                | 197,253,795          | Fully paid in cash                       |  | 1,972,538                | 1,972,538         |                          |  |
| 915,776,953                | 915,776,953          | Issued as bonus shares                   |  | 9,157,769                | 9,157,769         |                          |  |
| 72,029,258                 | 72,029,258           | Issued for consideration other than cash |  | 720,293                  | 720,293           |                          |  |
| <u>1,185,060,006</u>       | <u>1,185,060,006</u> |                                          |  | <u>11,850,600</u>        | <u>11,850,600</u> |                          |  |

### 21.3 The movement in the issued, subscribed and paid-up capital during the year is as follows:

| 2020<br>(Number of shares) |                      | 2019<br>(Number of shares)     |  | 2020<br>(Rupees in '000) |                   | 2019<br>(Rupees in '000) |  |
|----------------------------|----------------------|--------------------------------|--|--------------------------|-------------------|--------------------------|--|
| 1,185,060,006              | 1,185,060,006        | Opening balance at January 1   |  | 11,850,600               | 11,850,600        |                          |  |
| <u>1,185,060,006</u>       | <u>1,185,060,006</u> | Closing balance at December 31 |  | <u>11,850,600</u>        | <u>11,850,600</u> |                          |  |

### 21.4 Number of shares held by the associated undertakings as at December 31, are as follows:

|                                                           | 2020<br>Number of shares | 2019<br>Number of shares |
|-----------------------------------------------------------|--------------------------|--------------------------|
| Adamjee Insurance Company Limited                         | 47,827,287               | 47,827,287               |
| Nishat Mills Limited                                      | 88,015,291               | 88,015,291               |
| Siddiqsons Limited                                        | 14,276,462               | 14,276,462               |
| Nishat (Aziz Avenue) Hotels and Properties Limited        | 141,950                  | 29,000                   |
| Nishat Real Estates Development Company (Private) Limited | 54,500                   | –                        |
|                                                           | <u>150,315,490</u>       | <u>150,148,040</u>       |

|                                                                      | Note | 2020<br>(Rupees in '000) | 2019<br>(Rupees in '000) |
|----------------------------------------------------------------------|------|--------------------------|--------------------------|
| <b>22. RESERVES</b>                                                  |      |                          |                          |
| Share premium                                                        |      | 23,973,024               | 23,973,024               |
| Non- distributable capital reserve - gain on bargain purchase option | 22.1 | 908,317                  | 908,317                  |
| Exchange translation reserve                                         |      | 2,950,183                | 2,730,354                |
| Statutory reserve                                                    | 22.2 | 34,628,527               | 31,683,134               |
| General reserve                                                      |      | 18,600,000               | 18,600,000               |
|                                                                      |      | <u>81,060,051</u>        | <u>77,894,829</u>        |

**22.1** Under IFRS-3 a bargain purchase represents an economic gain which should be immediately recognized by the acquirer as income. However, the amount of bargain purchase gain was not taken to the profit and loss account as the SBP, through its letter BPRD(R&PD)/2017/14330 dated June 13, 2017 recommended that the amount of gain may be routed directly into equity as a Non-distributable Capital Reserve (NCR). The NCR may become available for distribution through a stock dividend only with prior approval of the SBP. The Group, before distribution of the gain as a stock dividend, may adjust any subsequent provisions/deficit, assessed by the Bank or recommended by the Banking Inspection Department of SBP, in the acquired assets and liabilities of NIB Bank Limited against the NCR.

**22.2** Statutory reserve represents amount set aside as per the requirements of section 21 of the Banking Companies Ordinance, 1962.

# Notes To The Consolidated Financial Statements

For the year ended December 31, 2020

|                                                                                                                           | Note | 2020<br>(Rupees in '000) | 2019       |
|---------------------------------------------------------------------------------------------------------------------------|------|--------------------------|------------|
| <b>23. SURPLUS ON REVALUATION OF ASSETS</b>                                                                               |      |                          |            |
| Surplus on revaluation of                                                                                                 |      |                          |            |
| - Available for sale securities                                                                                           | 10.1 | 12,924,291               | 6,655,770  |
| - Fixed Assets                                                                                                            | 23.1 | 20,856,881               | 21,031,256 |
| - Non-banking assets acquired in satisfaction of claims                                                                   | 23.2 | 854,231                  | 677,660    |
| - Associated undertaking                                                                                                  |      | 577,001                  | 611,247    |
|                                                                                                                           |      | 35,212,404               | 28,975,933 |
| Deferred tax on surplus on revaluation of:                                                                                |      |                          |            |
| - Available for sale securities                                                                                           | 19   | 4,523,498                | 2,329,519  |
| - Fixed Assets                                                                                                            | 23.1 | 1,329,511                | 1,390,542  |
| - Non-banking assets acquired in satisfaction of claims                                                                   | 23.2 | 298,982                  | 237,181    |
| - Associated undertaking                                                                                                  |      | 257,062                  | 266,485    |
|                                                                                                                           |      | 6,409,053                | 4,223,727  |
|                                                                                                                           |      | 28,803,351               | 24,752,206 |
| <b>23.1 Surplus on revaluation of fixed assets</b>                                                                        |      |                          |            |
| Surplus on revaluation of fixed assets as at January 1                                                                    |      | 21,031,256               | 13,685,180 |
| Recognised during the year                                                                                                |      | –                        | 7,439,943  |
| Realised on disposal during the year - net of deferred tax                                                                |      | (22,544)                 | (10,560)   |
| Transferred to unappropriated profit in respect of incremental depreciation charged during the year - net of deferred tax |      | (90,800)                 | (54,093)   |
| Related deferred tax liability on incremental depreciation charged during the year                                        |      | (48,892)                 | (29,127)   |
| Related deferred tax liability on surplus realised on disposal                                                            |      | (12,139)                 | (87)       |
| Surplus on revaluation of fixed assets as at December 31                                                                  |      | 20,856,881               | 21,031,256 |
| Less: Related deferred tax liability on:                                                                                  |      |                          |            |
| - revaluation as at January 1                                                                                             |      | 1,390,542                | 1,018,502  |
| - recognised during the year                                                                                              |      | –                        | 401,254    |
| - surplus realised on disposal during the year                                                                            |      | (12,139)                 | (87)       |
| - incremental depreciation charged during the year                                                                        |      | (48,892)                 | (29,127)   |
|                                                                                                                           |      | 1,329,511                | 1,390,542  |
|                                                                                                                           |      | 19,527,370               | 19,640,714 |
| <b>23.2 Surplus on revaluation of non-banking assets acquired in satisfaction of claims</b>                               |      |                          |            |
| Surplus on revaluation as at January 1                                                                                    |      | 677,660                  | 480,871    |
| Recognised during the year                                                                                                |      | 183,915                  | 255,040    |
| Realised on disposal during the year - net of deferred tax                                                                |      | (4,774)                  | (37,863)   |
| Related deferred tax liability on surplus realised on disposal                                                            |      | (2,570)                  | (20,388)   |
| Surplus on revaluation as at December 31                                                                                  |      | 854,231                  | 677,660    |
| Less: Related deferred tax liability on:                                                                                  |      |                          |            |
| - revaluation as at January 1                                                                                             |      | 237,181                  | 168,305    |
| - revaluation recognised during the year                                                                                  |      | 64,371                   | 89,264     |
| - surplus realised on disposal during the year                                                                            |      | (2,570)                  | (20,388)   |
|                                                                                                                           |      | 298,982                  | 237,181    |
|                                                                                                                           |      | 555,249                  | 440,479    |



# Notes To The Consolidated Financial Statements

For the year ended December 31, 2020

|                                                                            | Note   | 2020<br>(Rupees in '000) | 2019        |
|----------------------------------------------------------------------------|--------|--------------------------|-------------|
| <b>24. CONTINGENCIES AND COMMITMENTS</b>                                   |        |                          |             |
| - Guarantees                                                               | 24.1   | 186,572,634              | 180,002,174 |
| - Commitments                                                              | 24.2   | 525,404,920              | 657,101,777 |
| - Other contingent liabilities                                             | 24.3   | 28,397,749               | 28,352,091  |
|                                                                            |        | 740,375,303              | 865,456,042 |
| <b>24.1 Guarantees:</b>                                                    |        |                          |             |
| Financial guarantees                                                       |        | 149,925,920              | 141,181,839 |
| Performance guarantees                                                     |        | 29,835,397               | 33,833,099  |
| Other guarantees                                                           |        | 6,811,317                | 4,987,236   |
|                                                                            |        | 186,572,634              | 180,002,174 |
| <b>24.2 Commitments:</b>                                                   |        |                          |             |
| Documentary credits and short-term trade-related transactions              |        |                          |             |
| - letters of credit                                                        |        | 180,272,534              | 153,036,304 |
| Commitments in respect of:                                                 |        |                          |             |
| - forward foreign exchange contracts                                       | 24.2.1 | 327,646,242              | 404,891,089 |
| - forward government securities transactions                               | 24.2.2 | 11,089,775               | 87,696,638  |
| - derivatives                                                              | 24.2.3 | 4,471,383                | 10,244,806  |
| - commitments to extent credit                                             |        | 1,007,451                | 307,755     |
| Commitments for acquisition of:                                            |        |                          |             |
| - operating fixed assets                                                   |        | 710,570                  | 859,953     |
| - intangible assets                                                        |        | 206,965                  | 65,232      |
|                                                                            |        | 525,404,920              | 657,101,777 |
| <b>24.2.1 Commitments in respect of forward foreign exchange contracts</b> |        |                          |             |
| Purchase                                                                   |        | 172,137,589              | 216,647,656 |
| Sale                                                                       |        | 155,508,653              | 188,243,433 |
|                                                                            |        | 327,646,242              | 404,891,089 |
| <b>24.2.2 Commitments in respect of government securities transactions</b> |        |                          |             |
| Purchase                                                                   |        | 11,089,775               | 82,284,304  |
| Sale                                                                       |        | -                        | 5,412,334   |
|                                                                            |        | 11,089,775               | 87,696,638  |

# Notes To The Consolidated Financial Statements

For the year ended December 31, 2020

|                                                     | 2020             | 2019       |
|-----------------------------------------------------|------------------|------------|
|                                                     | (Rupees in '000) |            |
| <b>24.2.3 Commitments in respect of derivatives</b> |                  |            |
| FX options (notional)                               |                  |            |
| Purchase                                            | 182,800          | 431,449    |
| Sale                                                | 182,800          | 431,449    |
|                                                     | 365,600          | 862,898    |
| Cross Currency Swaps (notional)                     |                  |            |
| Purchase                                            | 1,975,311        | 4,428,663  |
| Sale                                                | 2,130,472        | 4,636,745  |
|                                                     | 4,105,783        | 9,065,408  |
| Interest Rate Swaps (notional)                      |                  |            |
| Purchase                                            | –                | 316,500    |
| Sale                                                | –                | –          |
|                                                     | –                | 316,500    |
|                                                     | 4,471,383        | 10,244,806 |
| <b>24.2.4 Other commitments</b>                     |                  |            |
| Commitments to extent credit                        | 1,007,451        | 307,755    |

**24.2.5** Other than those mentioned above, the group makes commitments to extend credit in the normal course of its business but these being revocable commitments do not attract any significant penalty or expense if the facility is unilaterally withdrawn.

|                                                   | Note   | 2020             | 2019       |
|---------------------------------------------------|--------|------------------|------------|
|                                                   |        | (Rupees in '000) |            |
| <b>24.3 Other contingent liabilities</b>          |        |                  |            |
| Claims against the Bank not acknowledged as debts | 24.3.1 | 28,397,749       | 28,352,091 |

**24.3.1** These represent certain claims by third parties against the Group, which are being contested in the Courts of law. The management is of the view that these relate to the normal course of business and the possibility of an outflow of economic resources is remote.

**24.4** For assessment year 1988-89 through tax year 2019, the tax department disputed Group treatment on certain issues, wherein the Group's appeals are pending at various appellate forums, entailing an additional tax liability of Rs. 6,033 million (2019: Rs. 1,487 million). Such issues inter alia principally include disallowance of expenses for non deduction of withholding tax and non availability of underlying records, provision for non performing loans, attribution of expenses to heads of income other than income from business and disallowance of credit for taxes paid in advance / deducted at source.

The Group has filed appeals which are pending at various appellate forums. In addition, certain decisions made in favour of the Group are being contested by the department at higher forums. No provision has been made in the financial statements regarding the aforesaid additional tax demand and already issued favourable decisions where the department is in appeal, as the management is of the view that the issues will be decided in the Group's favour as and when these are taken up by the Appellate Authorities.

**24.5 Amortisation of goodwill and other intangibles amounting to Rs 28.08 billion of Ex. NIB**

Issue of goodwill and other related assets amortization for few years has been assessed in Bank's favour at different appellate forums during the year, however the tax department has filed appeal against these decisions. The management has not recorded any tax benefit because the issue has not attained finality.

# Notes To The Consolidated Financial Statements

For the year ended December 31, 2020

## 25. DERIVATIVE INSTRUMENTS

### 25.1 Product Analysis

| Counterparties                 | 2020                 |                          |                     |                          |                    |                          |
|--------------------------------|----------------------|--------------------------|---------------------|--------------------------|--------------------|--------------------------|
|                                | Cross currency swaps |                          | Interest rate swaps |                          | FX option          |                          |
|                                | Notional principal   | Mark to market gain/loss | Notional principal  | Mark to market gain/loss | Notional principal | Mark to market gain/loss |
|                                | (Rupees in '000)     |                          |                     |                          |                    |                          |
| <b>With Banks for</b>          |                      |                          |                     |                          |                    |                          |
| Hedging                        | 1,975,311            | 512,508                  | -                   | -                        | 182,800            | 4,525                    |
| Market Making                  | -                    | -                        | -                   | -                        | -                  | -                        |
| <b>With other entities for</b> |                      |                          |                     |                          |                    |                          |
| Hedging                        | -                    | -                        | -                   | -                        | -                  | -                        |
| Market Making                  | 2,130,472            | (508,818)                | -                   | -                        | 182,800            | (4,525)                  |
| <b>Total</b>                   |                      |                          |                     |                          |                    |                          |
| Hedging                        | 1,975,311            | 512,508                  | -                   | -                        | 182,800            | 4,525                    |
| Market Making                  | 2,130,472            | (508,818)                | -                   | -                        | 182,800            | (4,525)                  |
|                                | 2019                 |                          |                     |                          |                    |                          |
| Counterparties                 | Cross currency swaps |                          | Interest rate swaps |                          | FX option          |                          |
|                                | Notional principal   | Mark to market gain/loss | Notional principal  | Mark to market gain/loss | Notional principal | Mark to market gain/loss |
|                                | (Rupees in '000)     |                          |                     |                          |                    |                          |
| <b>With Banks for</b>          |                      |                          |                     |                          |                    |                          |
| Hedging                        | 4,428,663            | 1,218,634                | 316,500             | 11,510                   | 431,449            | 2,683                    |
| Market Making                  | -                    | -                        | -                   | -                        | -                  | -                        |
| <b>With other entities for</b> |                      |                          |                     |                          |                    |                          |
| Hedging                        | -                    | -                        | -                   | -                        | -                  | -                        |
| Market Making                  | 4,636,745            | (1,226,433)              | -                   | -                        | 431,449            | (2,683)                  |
| <b>Total</b>                   |                      |                          |                     |                          |                    |                          |
| Hedging                        | 4,428,663            | 1,218,634                | 316,500             | 11,510                   | 431,449            | 2,683                    |
| Market Making                  | 4,636,745            | (1,226,433)              | -                   | -                        | 431,449            | (2,683)                  |

# Notes To The Consolidated Financial Statements

For the year ended December 31, 2020

## 25.2 Maturity Analysis

|                           | 2020             |                    |                  |                |              |
|---------------------------|------------------|--------------------|------------------|----------------|--------------|
|                           | No. of contracts | Notional principal | Mark to Market   |                | Net          |
|                           |                  |                    | Negative         | Positive       |              |
| (Rupees in '000)          |                  |                    |                  |                |              |
| <b>Remaining Maturity</b> |                  |                    |                  |                |              |
| Upto 1 month              | 8                | 924,787            | (54,638)         | 54,840         | 202          |
| 1 to 3 months             | 4                | 120,859            | (1,545)          | 1,545          | -            |
| 3 to 6 months             | 4                | 421,010            | (71,467)         | 71,915         | 448          |
| 6 month to 1 Year         | 3                | 329,626            | (23,640)         | 18,177         | (5,463)      |
| 1 to 2 Year               | 4                | 1,094,545          | (220,328)        | 226,567        | 6,239        |
| 2 to 3 Years              | 0                | -                  | -                | -              | -            |
| 3 to 5 Years              | 2                | 1,580,556          | (141,725)        | 143,989        | 2,264        |
| <b>Total</b>              | <b>25</b>        | <b>4,471,383</b>   | <b>(513,343)</b> | <b>517,033</b> | <b>3,690</b> |

  

|                           | 2019             |                    |                    |                  |              |
|---------------------------|------------------|--------------------|--------------------|------------------|--------------|
|                           | No. of contracts | Notional principal | Mark to Market     |                  | Net          |
|                           |                  |                    | Negative           | Positive         |              |
| (Rupees in '000)          |                  |                    |                    |                  |              |
| <b>Remaining Maturity</b> |                  |                    |                    |                  |              |
| Upto 1 month              | 14               | 409,597            | (518)              | 518              | -            |
| 1 to 3 months             | 32               | 1,076,111          | (154,368)          | 154,707          | 339          |
| 3 to 6 months             | 1                | 52,745             | (25,888)           | -                | (25,888)     |
| 6 month to 1 Year         | 7                | 1,847,480          | (298,299)          | 299,689          | 1,390        |
| 1 to 2 Year               | 9                | 3,199,475          | (312,482)          | 323,222          | 10,740       |
| 2 to 3 Years              | 4                | 1,714,098          | (340,100)          | 353,553          | 13,453       |
| 3 to 5 Years              | 2                | 1,945,300          | (101,151)          | 104,828          | 3,677        |
| <b>Total</b>              | <b>69</b>        | <b>10,244,806</b>  | <b>(1,232,806)</b> | <b>1,236,517</b> | <b>3,711</b> |

**25.3** Disclosure relating to qualitative and quantitative information on exchange traded derivatives are disclosed in note 45.5.

**25.4** Risk management related to derivatives is discussed in note 45.5.

|                                           | 2020               | 2019               |
|-------------------------------------------|--------------------|--------------------|
|                                           | (Rupees in '000)   |                    |
| <b>26. MARK-UP/RETURN/INTEREST EARNED</b> |                    |                    |
| Loans and advances                        | 50,061,684         | 64,738,017         |
| Investments                               | 94,248,954         | 77,292,876         |
| Lendings to financial institutions        | 1,092,986          | 5,361,703          |
| Balances with banks                       | 368,827            | 696,104            |
|                                           | <b>145,772,451</b> | <b>148,088,700</b> |

# Notes To The Consolidated Financial Statements

For the year ended December 31, 2020

|            |                                                                                  | 2020              | 2019              |
|------------|----------------------------------------------------------------------------------|-------------------|-------------------|
|            |                                                                                  | (Rupees in '000)  |                   |
| <b>27.</b> | <b>MARK-UP/RETURN/INTEREST EXPENSED</b>                                          |                   |                   |
|            | Deposits                                                                         | 59,436,050        | 70,280,198        |
|            | Borrowings                                                                       | 6,610,704         | 9,361,322         |
|            | Subordinated debt                                                                | –                 | 213,604           |
|            | Cost of foreign currency swaps against<br>foreign currency deposits / borrowings | 2,386,644         | 3,009,184         |
|            | Unwinding cost of liability against right-of-use assets                          | 1,495,614         | 1,506,301         |
|            |                                                                                  | <b>69,929,012</b> | <b>84,370,609</b> |
| <b>28.</b> | <b>FEE &amp; COMMISSION INCOME</b>                                               |                   |                   |
|            | Branch banking customer fees                                                     | 1,924,884         | 1,822,700         |
|            | Consumer finance related fees                                                    | 431,539           | 350,591           |
|            | Card related fees (debit and credit cards)                                       | 3,206,215         | 3,134,235         |
|            | Credit related fees                                                              | 60,484            | 188,443           |
|            | Investment banking fee                                                           | 161,192           | 181,177           |
|            | Commission on trade                                                              | 1,353,430         | 1,477,458         |
|            | Commission on guarantees                                                         | 608,822           | 607,844           |
|            | Commission on cash management                                                    | 615,001           | 612,178           |
|            | Commission on remittances including home remittances                             | 1,020,949         | 1,172,359         |
|            | Commission on utility bills                                                      | 79,791            | 106,320           |
|            | Commission income - Bancassurance                                                | 1,384,111         | 1,502,899         |
|            | Rent on lockers                                                                  | 230,996           | 245,866           |
|            | Commission on investments services                                               | 694,750           | 646,560           |
|            | Other Commission                                                                 | 199,327           | 182,241           |
|            |                                                                                  | <b>11,971,491</b> | <b>12,230,871</b> |
| <b>29.</b> | <b>GAIN ON SECURITIES, NET</b>                                                   |                   |                   |
|            | Realised                                                                         | 29.1              | 3,286,027         |
|            | Unrealised - held for trading                                                    | 10.1              | 110,269           |
|            |                                                                                  |                   | <b>3,396,296</b>  |
|            | <b>29.1</b> Realised gain on:                                                    |                   |                   |
|            | Federal Government Securities                                                    | 3,438,493         | 17,685            |
|            | Non Government Debt Securities                                                   | (76,066)          | –                 |
|            | Shares & units                                                                   | (38,094)          | 727,202           |
|            |                                                                                  | <b>3,324,333</b>  | <b>744,887</b>    |
| <b>30.</b> | <b>OTHER INCOME</b>                                                              |                   |                   |
|            | Rent on property                                                                 | 67,310            | 69,427            |
|            | Gain on sale of fixed assets-net                                                 | 73,164            | 63,176            |
|            | Loss on termination of lease liability<br>against right of use assets            | (15,637)          | –                 |
|            | Gain on conversion of Ijarah agreements                                          | 63,290            | –                 |
|            | Gain on sale of non banking assets - net                                         | 14.1.2            | 3,976             |
|            |                                                                                  | <b>192,103</b>    | <b>244,551</b>    |

# Notes To The Consolidated Financial Statements

For the year ended December 31, 2020

|                                                                          | Note   | 2020<br>(Rupees in '000) | 2019       |
|--------------------------------------------------------------------------|--------|--------------------------|------------|
| <b>31. OPERATING EXPENSES</b>                                            |        |                          |            |
| <b>Total compensation expense</b>                                        | 31.1   | 18,201,007               | 17,017,561 |
| <b>Property expense</b>                                                  |        |                          |            |
| Rent and taxes                                                           |        | 214,770                  | 395,237    |
| Insurance                                                                |        | 66,237                   | 57,198     |
| Utilities cost                                                           |        | 1,350,228                | 1,338,457  |
| Fuel expense generators                                                  |        | 334,634                  | 534,428    |
| Security (including guards)                                              |        | 1,444,492                | 1,589,659  |
| Repair and maintenance (including janitorial charges)                    |        | 758,318                  | 924,232    |
| Depreciation on right-of-use assets                                      | 12.3   | 1,697,826                | 1,610,893  |
| Depreciation                                                             | 12.2   | 845,654                  | 659,926    |
|                                                                          |        | 6,712,159                | 7,110,030  |
| <b>Information technology expenses</b>                                   |        |                          |            |
| Software maintenance                                                     |        | 1,304,566                | 1,279,569  |
| Hardware maintenance                                                     |        | 342,392                  | 372,808    |
| Depreciation                                                             | 12.2   | 688,155                  | 732,943    |
| Amortisation                                                             | 13     | 469,860                  | 425,585    |
| Network charges                                                          |        | 705,798                  | 714,755    |
| Insurance                                                                |        | 6,294                    | 5,198      |
|                                                                          |        | 3,517,065                | 3,530,858  |
| <b>Other operating expenses</b>                                          |        |                          |            |
| Directors' fees and allowances                                           |        | 50,060                   | 57,479     |
| Fees and allowances to Sharia Board members                              |        | 9,417                    | 9,147      |
| Legal and professional charges                                           |        | 312,026                  | 406,992    |
| Outsourced services costs                                                | 37.1   | 892,810                  | 891,883    |
| Travelling and conveyance                                                |        | 322,162                  | 412,033    |
| NIFT clearing charges                                                    |        | 186,480                  | 170,664    |
| Depreciation                                                             | 12.2   | 869,411                  | 840,139    |
| Depreciation on non-banking assets acquired<br>in satisfaction of claims | 14.1.1 | 30,049                   | 45,456     |
| Training and development                                                 |        | 43,062                   | 73,194     |
| Postage and courier charges                                              |        | 286,548                  | 355,306    |
| Communication                                                            |        | 353,513                  | 390,721    |
| Stationery and printing                                                  |        | 624,477                  | 710,930    |
| Marketing, advertisement & publicity                                     |        | 713,479                  | 683,174    |
| Donations                                                                | 31.2   | 112,596                  | 100        |
| Auditors' remuneration                                                   | 31.3   | 41,295                   | 43,305     |
| Cash transportation charges                                              |        | 709,262                  | 799,226    |
| Repair and maintenance                                                   |        | 404,247                  | 417,823    |
| Subscription                                                             |        | 43,581                   | 39,360     |
| Entertainment                                                            |        | 225,692                  | 275,532    |
| Remittance charges                                                       |        | 211,631                  | 197,223    |
| Brokerage expenses                                                       |        | 69,542                   | 48,342     |
| Card related expenses                                                    |        | 829,055                  | 1,182,346  |
| CNIC verification charges                                                |        | 128,614                  | 206,509    |
| Insurance                                                                |        | 1,570,511                | 1,511,988  |
| Others                                                                   |        | 294,166                  | 258,110    |
|                                                                          |        | 9,333,686                | 10,026,982 |
|                                                                          |        | 37,763,917               | 37,685,431 |

Total cost for the year included in other operating expenses relating to outsourced activities is Rs 275.517 million (2019: Rs 307.993 million) which pertains to payments made to companies incorporated in Pakistan. This includes payments other than outsourced services costs, which are disclosed above. Total Cost of outsourced activities for the year given to related parties is Rs 275.517 million (2019: Rs 258.190 million). Outsourcing shall have the same meaning as specified in BPRD Circular No. 06 of 2019.

## Notes To The Consolidated Financial Statements

For the year ended December 31, 2020

The Bank has material outsourcing arrangement with "Euronet Pakistan Private Limited" (a related party) for hosting of debit cards, prepaid cards, POS terminals and ATMs switch system. The annual cost of outsourcing is Rs 275.517 million (2019: 258.190 million).

|             | Note                                         | 2020<br>(Rupees in '000) | 2019              |
|-------------|----------------------------------------------|--------------------------|-------------------|
| <b>31.1</b> | <b>Total compensation expense</b>            |                          |                   |
|             | Fees and allowances                          | 488,500                  | 520,877           |
|             | Managerial remuneration                      |                          |                   |
|             | i) Fixed                                     | 12,913,952               | 12,380,700        |
|             | ii) Variable - cash bonus / awards           | 2,640,316                | 2,229,669         |
|             | Charge / (reversal) for defined benefit plan | 74,827                   | (101,509)         |
|             | Contribution to defined contribution plan    | 455,650                  | 422,671           |
|             | Commission                                   | 350,803                  | 341,105           |
|             | Staff group insurance                        | 433,891                  | 367,855           |
|             | Rent and house maintenance                   | 419,324                  | 404,007           |
|             | Medical                                      | 68,143                   | 67,855            |
|             | Conveyance                                   | 351,101                  | 346,631           |
|             | <b>Sub-total</b>                             | <b>18,196,507</b>        | <b>16,979,861</b> |
|             | Sign-on bonus                                | 3,700                    | 100               |
|             | Severance allowance                          | 800                      | 37,600            |
|             | <b>Grand Total</b>                           | <b>18,201,007</b>        | <b>17,017,561</b> |

**31.1.1** During the year sign on bonus was paid to 4 employees (2019: 1).

**31.1.2** Severance allowance pertains to 1 employee (2019: 6).

**31.2** Detail of donations made during the year is as follows:

|                                                                                                      | 2020<br>(Rupees in '000) | 2019       |
|------------------------------------------------------------------------------------------------------|--------------------------|------------|
| Saleem Memorial Trust Hospital                                                                       | 95,000                   | –          |
| Specialized Healthcare and Medical Education<br>Department, Government of Punjab - (COVID 19 relief) | 9,996                    | –          |
| Jahandad Society For Community Development                                                           | 5,000                    | –          |
| District Administration Lahore - (COVID 19 relief)                                                   | 2,600                    | –          |
| Murshid Hospital & Health Care Centre                                                                | –                        | 100        |
|                                                                                                      | <b>112,596</b>           | <b>100</b> |

**31.2.1** None of the directors, executives or their spouses had any interest in the donees, except for Mr. Yahya Saleem who is a director in the Saleem Memorial Trust Hospital.

|             | 2020<br>(Rupees in '000)                            | 2019          |
|-------------|-----------------------------------------------------|---------------|
| <b>31.3</b> | <b>Auditors' remuneration</b>                       |               |
|             | Audit fee                                           | 15,628        |
|             | Fee for audit of foreign branches                   | 9,905         |
|             | Fee for audit of subsidiaries                       | 13,361        |
|             | Special certifications and sundry advisory services | 348           |
|             | Sales tax                                           | 2,500         |
|             | Out-of-pocket expenses                              | 1,563         |
|             |                                                     | <b>43,305</b> |
|             | <b>41,295</b>                                       |               |

# Notes To The Consolidated Financial Statements

For the year ended December 31, 2020

|                                                                    | Note   | 2020<br>(Rupees in '000) | 2019              |
|--------------------------------------------------------------------|--------|--------------------------|-------------------|
| <b>32. OTHER CHARGES</b>                                           |        |                          |                   |
| Penalties of State Bank of Pakistan                                |        | 192,356                  | 70,455            |
| VAT & National Building tax & Crop Insurance Levy                  |        | 92,502                   | 179,643           |
| Education cess                                                     |        | 13,129                   | 10,645            |
|                                                                    |        | <b>297,987</b>           | <b>260,743</b>    |
| <b>33. PROVISIONS / (REVERSALS) &amp; WRITE OFFS - NET</b>         |        |                          |                   |
| (Reversal) of provision against balance with Banks                 |        | (3,547)                  | (3,111)           |
| (Reversal) / provision for diminution in value of investments      | 10.3.1 | (69,658)                 | 3,000,801         |
| Provision / (Reversal) against loans and advances                  | 11.4   | 7,558,293                | (144,827)         |
| (Reversal) / provision against off balance sheet items             | 20     | (448)                    | 9,025             |
| Reversal of provision against other assets                         | 14.2.1 | (23,648)                 | (23,436)          |
| Recovery of written off / charged off bad debts                    |        | (130,948)                | (164,860)         |
|                                                                    |        | <b>7,330,044</b>         | <b>2,673,592</b>  |
| <b>34. TAXATION</b>                                                |        |                          |                   |
| Current                                                            |        | 20,384,542               | 15,580,790        |
| Prior years                                                        |        | (8,023)                  | 450,785           |
| Deferred                                                           | 19     | (770,451)                | 55,718            |
| Share of tax of associates                                         |        | 149,951                  | 119,089           |
|                                                                    |        | <b>19,756,019</b>        | <b>16,206,382</b> |
| <b>34.1 Relationship between tax expense and accounting profit</b> |        |                          |                   |
| Accounting profit for the year                                     |        | 49,318,288               | 40,153,593        |
| Tax rate                                                           |        | 35%                      | 35%               |
| Tax on income                                                      |        | 17,261,401               | 14,053,758        |
| Tax effect of permanent differences                                |        | 67,325                   | 24,659            |
| Tax effect of prior years reversals                                |        | (8,023)                  | 450,785           |
| Others                                                             |        | 2,435,317                | 1,677,180         |
| Tax charge for the year                                            |        | <b>19,756,019</b>        | <b>16,206,382</b> |
|                                                                    |        | <b>(Rupees in '000)</b>  |                   |
| <b>35. BASIC AND DILUTED EARNINGS PER SHARE</b>                    |        |                          |                   |
| Profit for the year after tax attributable to equity shareholders  |        | 29,410,227               | 23,868,249        |
|                                                                    |        | <b>(Number)</b>          |                   |
| Weighted average number of ordinary shares                         |        | 1,185,060,006            | 1,185,060,006     |
|                                                                    |        | <b>(Rupees)</b>          |                   |
| Basic and diluted earnings per share                               |        | 24.82                    | 20.14             |





# Notes To The Consolidated Financial Statements

For the year ended December 31, 2020

|                                              | 2020     | 2019   |
|----------------------------------------------|----------|--------|
|                                              | (Number) |        |
| <b>37. STAFF STRENGTH</b>                    |          |        |
| Permanent                                    | 15,437   | 15,422 |
| On Bank contract                             | 130      | 142    |
| Bank's own staff strength at end of the year | 15,567   | 15,564 |

**37.1** In addition to the above, 618 (2019: 728) employees of outsourcing services companies were assigned to the Group as at the end of the year to perform services other than guarding, tea and janitorial services. Outsourced staff includes 611 (2019: 718) working domestically and 7 (2019: 10) working abroad.

## 38. DEFINED BENEFIT PLAN

### 38.1 General description

The Group operates the following retirement benefits for its employees:

- Pension fund - funded
- Benevolent scheme - unfunded
- Post retirement medical benefits - unfunded
- Employees compensated absence - unfunded

The plan assets and defined benefit obligations are based in Pakistan.

### 38.2 Number of Employees under the scheme

The number of employees covered under the following defined benefit schemes are:

|                                               | 2020     | 2019   |
|-----------------------------------------------|----------|--------|
|                                               | (Number) |        |
| - Pension fund - funded                       | 5,410    | 6,294  |
| - Benevolent scheme - unfunded                | 1,108    | 1,692  |
| - Post retirement medical benefits - unfunded | 13,386   | 13,332 |
| - Employees compensated absence - unfunded    | 13,386   | 13,332 |

### 38.3 Principal actuarial assumptions

The latest actuarial valuations of the pension fund, employees' contributory benevolent scheme, post retirement medical benefits and employee's compensated absences were carried out at December 31, 2020. The principal actuarial assumptions used are as follows:

|                                              | Approved Pension fund |       | Employees' contributory benevolent scheme |       | Post retirement medical benefits |       | Employees compensated absences |       |
|----------------------------------------------|-----------------------|-------|-------------------------------------------|-------|----------------------------------|-------|--------------------------------|-------|
|                                              | 2020                  | 2019  | 2020                                      | 2019  | 2020                             | 2019  | 2020                           | 2019  |
|                                              | (%)                   |       |                                           |       |                                  |       |                                |       |
| Discount rate                                | 9.75                  | 11.25 | 9.75                                      | 11.25 | 9.75                             | 11.25 | 9.75                           | 11.25 |
| Expected rate of return on plan assets       | 9.75                  | 11.25 | -                                         | -     | -                                | -     | -                              | -     |
| Expected rate of salary increase             | 7.75                  | 9.25  | 7.75                                      | 9.25  | -                                | -     | 7.75                           | 9.25  |
| Expected rate of increase in pension         | 0-5                   | 0-5   | -                                         | -     | -                                | -     | -                              | -     |
| Expected rate of increase in medical benefit | -                     | -     | -                                         | -     | 7.75                             | 9.25  | -                              | -     |

# Notes To The Consolidated Financial Statements

For the year ended December 31, 2020

## 38.4 Reconciliation of (receivable from) / payable to defined benefit plans

|                              | Approved Pension fund |             | Employees' contributory benevolent scheme |         | Post retirement medical benefits |           | Employees compensated absences |         |
|------------------------------|-----------------------|-------------|-------------------------------------------|---------|----------------------------------|-----------|--------------------------------|---------|
|                              | 2020                  | 2019        | 2020                                      | 2019    | 2020                             | 2019      | 2020                           | 2019    |
|                              | (Rupees in '000)      |             |                                           |         |                                  |           |                                |         |
| Present value of obligations | 5,097,744             | 5,182,991   | 222,084                                   | 221,193 | 2,004,122                        | 1,921,348 | 919,407                        | 939,495 |
| Fair value of plan assets    | (8,467,923)           | (8,788,112) | -                                         | -       | -                                | -         | -                              | -       |
| (Receivable) / payable       | (3,370,179)           | (3,605,121) | 222,084                                   | 221,193 | 2,004,122                        | 1,921,348 | 919,407                        | 939,495 |

## 38.5 Movement in defined benefit obligations

|                                          | Note   | Approved Pension fund |           | Employees' contributory benevolent scheme |          | Post retirement medical benefits |           | Employees compensated absences |           |
|------------------------------------------|--------|-----------------------|-----------|-------------------------------------------|----------|----------------------------------|-----------|--------------------------------|-----------|
|                                          |        | 2020                  | 2019      | 2020                                      | 2019     | 2020                             | 2019      | 2020                           | 2019      |
|                                          |        | (Rupees in '000)      |           |                                           |          |                                  |           |                                |           |
| Obligations at the beginning of the year |        | 5,182,991             | 4,690,587 | 221,193                                   | 214,252  | 1,921,348                        | 1,730,409 | 939,495                        | 1,028,129 |
| Current service cost                     | 38.8.1 | 64,350                | 60,879    | 21,742                                    | 22,341   | 53,018                           | 43,653    | 24,428                         | 24,740    |
| Interest cost                            |        | 560,303               | 592,985   | 22,931                                    | 26,035   | 208,381                          | 219,145   | 98,224                         | 128,046   |
| Benefits paid                            |        | (405,032)             | (430,453) | (34,721)                                  | (35,528) | (138,149)                        | (152,964) | (132,782)                      | (123,486) |
| Re-measurement loss / (gain)             | 38.8.2 | (304,868)             | 268,993   | (9,061)                                   | (5,907)  | (40,476)                         | 81,105    | (9,958)                        | (117,934) |
| Obligations at end of the year           |        | 5,097,744             | 5,182,991 | 222,084                                   | 221,193  | 2,004,122                        | 1,921,348 | 919,407                        | 939,495   |

## 38.6 Movement in fair value of plan assets

|                                         | Note   | Approved Pension fund |           | Employees' contributory benevolent scheme |      | Post retirement medical benefits |      | Employees compensated absences |      |
|-----------------------------------------|--------|-----------------------|-----------|-------------------------------------------|------|----------------------------------|------|--------------------------------|------|
|                                         |        | 2020                  | 2019      | 2020                                      | 2019 | 2020                             | 2019 | 2020                           | 2019 |
|                                         |        | (Rupees in '000)      |           |                                           |      |                                  |      |                                |      |
| Fair value at the beginning of the year |        | 8,788,112             | 8,505,757 | -                                         | -    | -                                | -    | -                              | -    |
| Interest income on plan assets          |        | 965,880               | 1,098,495 | -                                         | -    | -                                | -    | -                              | -    |
| Benefits paid                           |        | (405,032)             | (430,453) | -                                         | -    | -                                | -    | -                              | -    |
| Re-measurement loss                     | 38.8.2 | (881,037)             | (385,687) | -                                         | -    | -                                | -    | -                              | -    |
| Fair value at end of the year           |        | 8,467,923             | 8,788,112 | -                                         | -    | -                                | -    | -                              | -    |

## 38.7 Movement in (receivable) / payable under defined benefit schemes

|                                                                | Note   | Approved Pension fund |             | Employees' contributory benevolent scheme |          | Post retirement medical benefits |           | Employees compensated absences |           |
|----------------------------------------------------------------|--------|-----------------------|-------------|-------------------------------------------|----------|----------------------------------|-----------|--------------------------------|-----------|
|                                                                |        | 2020                  | 2019        | 2020                                      | 2019     | 2020                             | 2019      | 2020                           | 2019      |
|                                                                |        | (Rupees in '000)      |             |                                           |          |                                  |           |                                |           |
| Opening balance                                                |        | (3,605,121)           | (3,815,170) | 221,193                                   | 214,252  | 1,921,348                        | 1,730,409 | 939,495                        | 1,028,129 |
| Charge / (reversal) for the year                               | 38.8.1 | (341,227)             | (444,631)   | 41,961                                    | 45,472   | 261,399                          | 262,798   | 112,694                        | 34,852    |
| Employees' contribution                                        |        | -                     | -           | 2,712                                     | 2,904    | -                                | -         | -                              | -         |
| Re-measurement loss / (gain) recognised in OCI during the year | 38.8.2 | -                     | -           | -                                         | -        | -                                | -         | -                              | -         |
| Benefits paid by the Group                                     |        | -                     | -           | (34,721)                                  | (35,528) | (138,149)                        | (152,964) | (132,782)                      | (123,486) |
| Closing balance                                                |        | (3,370,179)           | (3,605,121) | 222,084                                   | 221,193  | 2,004,122                        | 1,921,348 | 919,407                        | 939,495   |

# Notes To The Consolidated Financial Statements

For the year ended December 31, 2020

## 38.8 Charge for defined benefit plans

### 38.8.1 Cost recognised in profit and loss

| Note                                              | Approved Pension fund |           | Employees' contributory benevolent scheme |         | Post retirement medical benefits |         | Employees compensated absences |           |
|---------------------------------------------------|-----------------------|-----------|-------------------------------------------|---------|----------------------------------|---------|--------------------------------|-----------|
|                                                   | 2020                  | 2019      | 2020                                      | 2019    | 2020                             | 2019    | 2020                           | 2019      |
|                                                   | (Rupees in '000)      |           |                                           |         |                                  |         |                                |           |
| Current service cost                              | 64,350                | 60,879    | 21,742                                    | 22,341  | 53,018                           | 43,653  | 24,428                         | 24,740    |
| Net interest on defined benefit asset / liability | (405,577)             | (505,510) | 22,931                                    | 26,035  | 208,381                          | 219,145 | 98,224                         | 128,046   |
| Employees' contribution                           | -                     | -         | (2,712)                                   | (2,904) | -                                | -       | -                              | -         |
| Actuarial (gain)                                  | -                     | -         | -                                         | -       | -                                | -       | (9,958)                        | (117,934) |
|                                                   | (341,227)             | (444,631) | 41,961                                    | 45,472  | 261,399                          | 262,798 | 112,694                        | 34,852    |

### 38.8.2 Re-measurements recognised in OCI during the year

|                                                            | Approved Pension fund |         | Employees' contributory benevolent scheme |         | Post retirement medical benefits |        | Employees compensated absences |      |
|------------------------------------------------------------|-----------------------|---------|-------------------------------------------|---------|----------------------------------|--------|--------------------------------|------|
|                                                            | 2020                  | 2019    | 2020                                      | 2019    | 2020                             | 2019   | 2020                           | 2019 |
|                                                            | (Rupees in '000)      |         |                                           |         |                                  |        |                                |      |
| Loss / (gain) on obligation - financial assumptions        | (304,868)             | 268,993 | (9,061)                                   | (5,907) | (40,476)                         | 81,105 | -                              | -    |
| Actual return on plan assets over expected interest income | 881,037               | 385,687 | -                                         | -       | -                                | -      | -                              | -    |
| Re-measurement loss / (gain) recognised in OCI             | 576,169               | 654,680 | (9,061)                                   | (5,907) | (40,476)                         | 81,105 | -                              | -    |

## 38.9 Components of plan assets

|                                 | Approved Pension fund |           | Employees' contributory benevolent scheme |      | Post retirement medical benefits |      | Employees compensated absences |      |
|---------------------------------|-----------------------|-----------|-------------------------------------------|------|----------------------------------|------|--------------------------------|------|
|                                 | 2020                  | 2019      | 2020                                      | 2019 | 2020                             | 2019 | 2020                           | 2019 |
|                                 | (Rupees in '000)      |           |                                           |      |                                  |      |                                |      |
| Cash and cash equivalents - net | 24,451                | 107,344   | -                                         | -    | -                                | -    | -                              | -    |
| Shares                          | 8,129,575             | 8,387,473 | -                                         | -    | -                                | -    | -                              | -    |
| Open ended mutual funds units   | 313,897               | 293,295   | -                                         | -    | -                                | -    | -                              | -    |
|                                 | 8,467,923             | 8,788,112 | -                                         | -    | -                                | -    | -                              | -    |

### 38.9.1 Significant risk associated with the plan assets

The Fund's investments in equity securities and units of mutual funds are subject to price risk. These risks are regularly monitored by Trustees of the employee funds.

## Notes To The Consolidated Financial Statements

For the year ended December 31, 2020

### 38.10 Sensitivity analysis

Sensitivity analysis has been performed by varying one assumption keeping all other assumptions constant and calculating the impact on the present value of the defined benefit obligations under the various employee benefit schemes. The increase / (decrease) in the present value of defined benefit obligations as a result of change in each assumption is summarized below:

|                                                          | Approved Pension fund | Employees' contributory benevolent scheme | Post retirement medical benefits | Employees compensated absences |
|----------------------------------------------------------|-----------------------|-------------------------------------------|----------------------------------|--------------------------------|
|                                                          | (Rupees in '000)      |                                           |                                  |                                |
| 1% increase in discount rate                             | (337,220)             | (16,983)                                  | (222,612)                        | (56,543)                       |
| 1% decrease in discount rate                             | 384,510               | 19,474                                    | 275,965                          | 62,843                         |
| 1 % increase in expected rate of salary increase         | 78,500                | –                                         | –                                | 63,453                         |
| 1 % decrease in expected rate of salary increase         | (73,370)              | –                                         | –                                | (58,050)                       |
| 1% increase in expected rate of pension increase         | 282,140               | –                                         | –                                | –                              |
| 1% decrease in expected rate of pension increase         | (252,260)             | –                                         | –                                | –                              |
| 1% increase in expected rate of medical benefit increase | –                     | –                                         | 144,805                          | –                              |
| 1% decrease in expected rate of medical benefit increase | –                     | –                                         | (123,190)                        | –                              |

### 38.11 Expected contributions to be paid to the funds in the next financial year

No contributions are being made to pension fund due to surplus of fair value of plan's assets over present value of defined obligation. No contribution to the pension fund is expected in the next year.

### 38.12 Expected charge / (reversal) for the next financial year

Based on actuarial advice, management estimates that the charge / (reversal) in respect of defined benefit plans for the year ending December 31, 2021 would be as follows:

|                                                            | Approved Pension fund | Employees' contributory benevolent scheme | Post retirement medical benefits | Employees compensated absences |
|------------------------------------------------------------|-----------------------|-------------------------------------------|----------------------------------|--------------------------------|
|                                                            | (Rupees in '000)      |                                           |                                  |                                |
| Expected charge / (reversal) for the next financial year   | (265,940)             | 38,232                                    | 257,380                          | 114,262                        |
| 38.13 <b>Maturity profile</b>                              |                       |                                           |                                  |                                |
| The weighted average duration of the obligation (in years) | 8.34                  | 8.34                                      | 8.34                             | 8.34                           |

### 38.14 Funding Policy

The Bank endeavours to ensure that liabilities under the various employee benefit schemes are covered by the Fund on any valuation date having regards to the various actuarial assumptions such as projected future salary increase, expected future contributions to the fund, projected increase in liability associated with future service and the projected investment income of the Fund.

# Notes To The Consolidated Financial Statements

For the year ended December 31, 2020

**38.15** The defined benefit plans may expose the Group to actuarial risks such as longevity risk, investment risk, salary increase risk and withdrawal rate risk as described below;

|                      |                                                                                                                                                                                                               |
|----------------------|---------------------------------------------------------------------------------------------------------------------------------------------------------------------------------------------------------------|
| Investment risk      | The risk arises when the actual performance of the investments is lower than expectation and thus creating a shortfall in the funding objectives.                                                             |
| Longevity risk       | The risk arises when the actual lifetime of retirees is longer than expectation. This risk is measured at the plan level over the entire retiree population.                                                  |
| Salary increase risk | The most common type of retirement benefit is one where the benefit is linked with final salary. The risk arises when the actual increases are higher than expectation and impacts the liability accordingly. |
| Withdrawal rate      | The risk of actual withdrawals varying with the actuarial assumptions can impose a risk to the benefit obligation. The movement of the liability can go either way.                                           |

## 39. DEFINED CONTRIBUTION PLAN

### MCB Bank Limited (holding company)

The Bank operates an approved contributory provident fund for 11,458 (2019: 11,056) employees where contributions are made by the Bank at 8.33% (2019: 8.33%) and employees ranging from 8.33% to 15% per annum (2019: 8.33% to 15% per annum) of the basic salary.

The Bank also operates an approved non-contributory provident fund for 687 (2019: 745) employees who have opted for the new scheme, where contributions are made by the employees ranging from 8.33% to 15% per annum (2019: 8.33% to 15% per annum) of the basic salary.

### 39.1 MCB Islamic Bank Limited

The Bank operates an approved contributory provident fund for 1,384 (2019: 1,304) employees. Equal monthly contributions are made both by the Bank and its permanent employees to the Fund at the rate of 8.33% of the basic salaries of employees. However, an employee has an option to increase his / her contribution upto 15% but the Bank will still contribute 8.33% of the employee's basic salary.

## 40. COMPENSATION OF DIRECTORS AND KEY MANAGEMENT PERSONNEL

### 40.1. Total compensation expense

|                                           |           | 2020                       |               |                       |                |                          |                                         |                  |
|-------------------------------------------|-----------|----------------------------|---------------|-----------------------|----------------|--------------------------|-----------------------------------------|------------------|
| Note                                      | Directors |                            |               | Members shariah board | President/ CEO | Key management personnel | Other material risk takers/ controllers |                  |
|                                           | Chairman  | Executive (other than CEO) | Non executive |                       |                |                          |                                         |                  |
| (Rupees in '000)                          |           |                            |               |                       |                |                          |                                         |                  |
| Fee and allowances                        | 40.2      | 7,210                      | -             | 42,850                | -              | -                        | 112                                     | 10,941           |
| Managerial Remuneration                   |           |                            |               |                       |                |                          |                                         |                  |
| i) Fixed                                  |           | -                          | -             | -                     | 5,681          | 72,362                   | 342,162                                 | 861,129          |
| ii) Cash Bonus / Awards                   | 40.1.1    | -                          | -             | -                     | 900            | 50,000                   | 170,969                                 | 293,927          |
| Contribution to defined contribution plan |           | -                          | -             | -                     | 177            | -                        | 9,608                                   | 34,877           |
| Rent & house maintenance                  |           | -                          | -             | -                     | 957            | 240                      | 28,190                                  | 84,950           |
| Medical                                   |           | -                          | -             | -                     | -              | 1,828                    | 2,414                                   | 11,639           |
| Severance allowance                       |           | -                          | -             | -                     | -              | -                        | 800                                     | -                |
| Overseas allowance                        |           | -                          | -             | -                     | -              | -                        | 37,559                                  | -                |
| Security                                  |           | -                          | -             | -                     | -              | 804                      | -                                       | -                |
| Commission                                |           | -                          | -             | -                     | -              | -                        | 300                                     | 43,960           |
| Utilities                                 |           | -                          | -             | -                     | 213            | -                        | 2,767                                   | 16,445           |
| Special Pay                               |           | -                          | -             | -                     | 241            | -                        | -                                       | 13,123           |
| Conveyance                                |           | -                          | -             | -                     | 1,020          | -                        | -                                       | 49,713           |
| Club membership                           |           | -                          | -             | -                     | -              | 1,872                    | -                                       | 300              |
| Fuel Allowance                            |           | -                          | -             | -                     | 228            | -                        | -                                       | 11,478           |
| Leave fare assistance                     |           | -                          | -             | -                     | -              | -                        | 1,213                                   | 11,679           |
| Others                                    |           | -                          | -             | -                     | -              | -                        | 5,989                                   | 27,106           |
| <b>Total</b>                              |           | <b>7,210</b>               | <b>-</b>      | <b>42,850</b>         | <b>9,417</b>   | <b>127,106</b>           | <b>602,083</b>                          | <b>1,471,267</b> |
| Number of Persons                         |           | 1                          | -             | 11                    | 3              | 1                        | 27                                      | 200              |

# Notes To The Consolidated Financial Statements

For the year ended December 31, 2020

| Note                                      | 2019      |                            |               |                       |                |                          |                                         |           |
|-------------------------------------------|-----------|----------------------------|---------------|-----------------------|----------------|--------------------------|-----------------------------------------|-----------|
|                                           | Directors |                            |               | Members shariah board | President/ CEO | Key management personnel | Other material risk takers/ controllers |           |
|                                           | Chairman  | Executive (other than CEO) | Non executive |                       |                |                          |                                         |           |
| (Rupees in '000)                          |           |                            |               |                       |                |                          |                                         |           |
| Fee and allowances                        | 40.2      | 25,000                     | -             | 32,479                | -              | -                        | 672                                     | 5,418     |
| Managerial Remuneration                   |           |                            |               |                       |                |                          |                                         |           |
| i) Fixed                                  |           | -                          | -             | -                     | 5,319          | 63,046                   | 337,830                                 | 645,432   |
| ii) Cash Bonus / Awards                   |           | -                          | -             | -                     | 1,000          | 40,000                   | 163,711                                 | 199,635   |
| Contribution to defined contribution plan |           | -                          | -             | -                     | 163            | 2,484                    | 10,204                                  | 26,850    |
| Rent & house maintenance                  |           | -                          | -             | -                     | 879            | 240                      | 29,636                                  | 90,690    |
| Medical                                   |           | -                          | -             | -                     | -              | 1,071                    | 2,369                                   | 10,637    |
| Severance allowance                       |           | -                          | -             | -                     | -              | -                        | 18,500                                  | 8,800     |
| Overseas allowance                        |           | -                          | -             | -                     | -              | -                        | 38,947                                  | 7,416     |
| Security                                  |           | -                          | -             | -                     | -              | 1,189                    | -                                       | -         |
| Commission                                |           | -                          | -             | -                     | -              | -                        | 57                                      | 14,471    |
| Utilities                                 |           | -                          | -             | -                     | 195            | -                        | 3,175                                   | 18,282    |
| Special pay                               |           | -                          | -             | -                     | 241            | -                        | 162                                     | 15,882    |
| Conveyance                                |           | -                          | -             | -                     | 1,122          | -                        | -                                       | 62,670    |
| Club membership                           |           | -                          | -             | -                     | -              | 70                       | -                                       | -         |
| Fuel Allowance                            |           | -                          | -             | -                     | 228            | -                        | 202                                     | 14,311    |
| Leave fare assistance                     |           | -                          | -             | -                     | -              | -                        | 4,290                                   | 16,170    |
| Others                                    |           | -                          | -             | -                     | -              | -                        | 5,642                                   | 24,374    |
| Total                                     |           | 25,000                     | -             | 32,479                | 9,147          | 108,100                  | 615,397                                 | 1,161,038 |
| Number of Persons                         |           | 1                          | -             | 12                    | 3              | 1                        | 27                                      | 173       |

**40.1.1** During the year 2020, Rs 26.06 million bonus has been deferred.

**40.2** Remuneration paid to Directors for participation in Board and Committee meetings

|                             | 2020                |                         |         |          |         |       |         |         |         |                    |        |
|-----------------------------|---------------------|-------------------------|---------|----------|---------|-------|---------|---------|---------|--------------------|--------|
|                             | For Board Committee |                         |         |          |         |       |         |         |         |                    |        |
|                             | Board meeting       | Board's Audit Committee | BS & DC | RM & PRC | HR & RC | ITC   | PP & CA | CR & MC | Wo & WC | *As Board Chairman | Total  |
| (Rupees in '000)            |                     |                         |         |          |         |       |         |         |         |                    |        |
| Mian Mohammad Mansha        | 3,840               | -                       | 300     | -        | 300     | -     | 400     | -       | -       | 2,370              | 7,210  |
| Mr. S. M. Muneer            | 1,700               | -                       | 100     | -        | -       | -     | -       | 100     | -       | -                  | 1,900  |
| Mr. Mohammad Tariq Rafi     | 1,700               | -                       | -       | -        | -       | -     | -       | -       | 200     | -                  | 1,900  |
| Mian Umer Mansha            | 1,700               | 500                     | 400     | 500      | -       | 500   | 400     | -       | 300     | -                  | 4,300  |
| Mrs. Iqraa Hassan Mansha    | 1,200               | -                       | -       | -        | 200     | -     | 100     | -       | -       | -                  | 1,500  |
| Mr. Muhammad Ali Zeb        | 1,700               | 500                     | -       | 500      | 300     | -     | 300     | 400     | 300     | -                  | 4,000  |
| Mr. Mohd Suhail Amar Suresh | 4,460               | -                       | 400     | 500      | -       | 500   | -       | -       | -       | -                  | 5,860  |
| Mr. Yahya Saleem            | 4,466               | -                       | -       | -        | 300     | 200   | -       | -       | -       | -                  | 4,966  |
| Mr. Salman Khalid Butt      | 4,586               | -                       | 400     | 500      | -       | 500   | -       | 400     | -       | -                  | 6,386  |
| Mr. Masood Ahmed Puri       | 4,466               | -                       | 400     | -        | -       | -     | -       | -       | -       | -                  | 4,866  |
| Mr. Shahzad Hussain         | 1,700               | 500                     | -       | -        | -       | -     | -       | -       | -       | -                  | 2,200  |
| Mr. Shariffuddin Bin Khalid | 4,472               | 500                     | -       | -        | -       | -     | -       | -       | -       | -                  | 4,972  |
|                             | 35,990              | 2,000                   | 2,000   | 2,000    | 1,100   | 1,700 | 1,200   | 900     | 800     | 2,370              | 50,060 |

# Notes To The Consolidated Financial Statements

For the year ended December 31, 2020

2019

|                             | For Board Committee |               |         |          |         |       |         |         |         |                    | Total  |
|-----------------------------|---------------------|---------------|---------|----------|---------|-------|---------|---------|---------|--------------------|--------|
|                             | Board meeting       | Board's Audit | BS & DC | RM & PRC | HR & RC | ITC   | PP & CA | CR & MC | Wo & WC | *As Board Chairman |        |
|                             | (Rupees in '000)    |               |         |          |         |       |         |         |         |                    |        |
| Mian Mohammad Mansha        | -                   | -             | -       | -        | -       | -     | -       | -       | -       | 25,000             | 25,000 |
| Mr. S. M. Muneer            | 130                 | -             | 30      | -        | -       | -     | -       | 30      | -       | -                  | 190    |
| Mr. Tariq Rafi              | 430                 | -             | -       | -        | -       | -     | -       | -       | -       | -                  | 430    |
| Mian Umer Mansha            | 300                 | 330           | 330     | 300      | -       | 330   | 330     | -       | -       | -                  | 1,920  |
| Mrs. Iqraa Hassan Mansha    | 230                 | -             | -       | -        | -       | -     | -       | -       | -       | -                  | 230    |
| Mr. Muhammad Ali Zeb        | 330                 | 330           | -       | 230      | 330     | -     | 300     | 330     | -       | -                  | 1,850  |
| Mr. Mohd Suhail Amar Suresh | 4,620               | -             | 230     | 230      | -       | 230   | -       | -       | -       | -                  | 5,310  |
| Mr. Yahya Saleem            | 4,710               | -             | -       | -        | 130     | 200   | -       | -       | -       | -                  | 5,040  |
| Mr. Salman Khalid Butt      | 5,814               | -             | 330     | 230      | -       | 330   | -       | 300     | -       | -                  | 7,004  |
| Mr. Masood Ahmed Puri       | 3,503               | -             | 200     | -        | -       | -     | -       | -       | -       | -                  | 3,703  |
| Mr. Shahzad Hussain         | 300                 | 300           | -       | -        | -       | -     | -       | -       | -       | -                  | 600    |
| Mr. Sharifuddin Bin Khalid  | 3,504               | 300           | -       | -        | -       | -     | -       | -       | -       | -                  | 3,804  |
| Mr. Nor Hizam Bin Hashim    | 2,268               | 130           | -       | -        | -       | -     | -       | -       | -       | -                  | 2,398  |
|                             | 26,139              | 1,390         | 1,120   | 990      | 460     | 1,090 | 630     | 660     | -       | 25,000             | 57,479 |

\*During the year, the Board Chairman was paid proportionate amount of Rs 2.370 million in lieu of fixed annual remuneration (2019: Rs. 25 million) approved by the shareholders of the Group in its 62nd Annual General Meeting held on March 26, 2010. Effective from February 05, 2020 in accordance with BPRD Circular No. 03 of 2019 dated August 19, 2019, the remuneration to the Chairman for attending the Board and committee meetings was paid inline with the remuneration scale approved by the shareholders of the Group in its 72nd Annual General Meeting held on March 19, 2020.

**40.3** The Chairman has been provided with free use of the Group maintained car. In addition to the above, the Chief Executive and certain executives are provided with free use of the Group maintained cars and household equipment in accordance with the terms of their employment.

**40.4** Remuneration paid to Shariah Board Members

2020

|                             | Chairman         | Resident member | Non-Resident (member) | Total |
|-----------------------------|------------------|-----------------|-----------------------|-------|
|                             | (Rupees in '000) |                 |                       |       |
| Meeting Fees and Allowances | -                | -               | -                     | -     |
| Other Heads                 |                  |                 |                       |       |
| Basic salary                | 2,263            | 2,128           | 1,290                 | 5,681 |
| House rent                  | -                | 957             | -                     | 957   |
| Utilities                   | -                | 213             | -                     | 213   |
| Conveyance                  | -                | 1,020           | -                     | 1,020 |
| Fuel                        | -                | 228             | -                     | 228   |
| Special pay                 | -                | 241             | -                     | 241   |
| Bonus                       | -                | 900             | -                     | 900   |
| PF Employer                 | -                | 177             | -                     | 177   |
| Total Amount                | 2,263            | 5,864           | 1,290                 | 9,417 |
| Total Number of Persons     | 1                | 1               | 1                     | 3     |



# Notes To The Consolidated Financial Statements

For the year ended December 31, 2020

|                             | 2019             |                 |                       |       |
|-----------------------------|------------------|-----------------|-----------------------|-------|
|                             | Chairman         | Resident member | Non-Resident (member) | Total |
|                             | (Rupees in '000) |                 |                       |       |
| Meeting Fees and Allowances | -                | -               | -                     | -     |
| Other Heads                 |                  |                 |                       |       |
| Basic salary                | 2,166            | 1,953           | 1,200                 | 5,319 |
| House rent                  | -                | 879             | -                     | 879   |
| Utilities                   | -                | 195             | -                     | 195   |
| Conveyance                  | -                | 1,122           | -                     | 1,122 |
| Fuel                        | -                | 228             | -                     | 228   |
| Special pay                 | -                | 241             | -                     | 241   |
| Bonus                       | -                | 1,000           | -                     | 1,000 |
| PF Employer                 | -                | 163             | -                     | 163   |
| Total Amount                | 2,166            | 5,781           | 1,200                 | 9,147 |
| Number of persons           | 1                | 1               | 1                     | 3     |

## 41. FAIR VALUE MEASUREMENTS

The fair value of traded investments is based on quoted market prices, except for tradable securities classified by the Group as 'held to maturity'. Quoted securities classified as held to maturity are carried at amortised cost. Fair value of unquoted equity investments other than investments in associates is determined on the basis of break up value of these investments as per the latest available financial statements.

Fair value of fixed term loans, other assets, other liabilities, fixed term deposits and borrowings cannot be calculated with sufficient reliability due to absence of current and active market for such assets and liabilities and reliable data regarding market rates for similar instruments. The provision for impairment of loans and advances has been calculated in accordance with the Group accounting policy as stated in note 6.5 to these consolidated financial statements.

The maturity and repricing profile and effective rates are stated in note 45.

In the opinion of the management, the fair value of the financial assets and financial liabilities other than those carried at fair value and disclosed in note 41.1 are not significantly different from their carrying values since assets and liabilities are either short-term in nature or re-priced over short term.

### 41.1 Fair value of financial assets

The Group measures fair values using the following fair value hierarchy that reflects the significance of the inputs used in making the measurements:

**Level 1:** Fair value measurements using quoted prices (unadjusted) in active markets for identical assets or liabilities.

**Level 2:** Fair value measurements using inputs other than quoted prices included within Level 1 that are observable for the assets or liability, either directly (i.e. as prices) or indirectly (i.e. derived from prices).

**Level 3:** Fair value measurements using input for the asset or liability that are not based on observable market data (i.e. unobservable inputs).

# Notes To The Consolidated Financial Statements

For the year ended December 31, 2020

Valuation techniques used in determination of fair valuation of financial instruments within level 2

| Item                                             | Valuation approach and input used                                                                                                                                                                                                                                                                                                                                                                                      |
|--------------------------------------------------|------------------------------------------------------------------------------------------------------------------------------------------------------------------------------------------------------------------------------------------------------------------------------------------------------------------------------------------------------------------------------------------------------------------------|
| Federal Government securities                    | The fair values of Federal Government securities are determined using the PKRV rates.                                                                                                                                                                                                                                                                                                                                  |
| Term Finance and Bonds                           | Investments in debt securities (comprising term finance certificates, bonds and any other security issued by a company or a body corporate for the purpose of raising funds in the form of redeemable capital) are valued on the basis of the rates announced by the Mutual Funds Association of Pakistan (MUFAP) in accordance with the methodology prescribed by the Securities and Exchange Commission of Pakistan. |
| Foreign exchange contracts                       | The valuation has been determined by interpolating the mid rates announced by the State Bank of Pakistan.                                                                                                                                                                                                                                                                                                              |
| Derivatives                                      | The fair values of derivatives which are not quoted in active markets are determined by using valuation techniques. The valuation techniques take into account the relevant underlying parameters including foreign currency involved, interest rates, yield curves, volatilities, contracts duration etc.                                                                                                             |
| Operating fixed assets (land and building) & NBA | Land and buildings are revalued every three years using professional valuers on the panel of Pakistan Banker's Association. The valuation is based on their assessment of market value of the properties.                                                                                                                                                                                                              |

The table below analyses the financial and non-financial assets carried at fair values, by valuation methods. For financial assets, the Group essentially carries its investments in debt and equity securities at fair values. Valuation of investments is carried out as per guidelines specified by the SBP. In case of non-financial assets, the Group has adopted revaluation model (as per IAS 16) in respect of land and building.

|                                                                         | 2020             |            |             |         | Total       |
|-------------------------------------------------------------------------|------------------|------------|-------------|---------|-------------|
|                                                                         | Carrying value   | Level 1    | Level 2     | Level 3 |             |
|                                                                         | (Rupees in '000) |            |             |         |             |
| <b>On balance sheet financial instruments</b>                           |                  |            |             |         |             |
| <b>Financial assets - measured at fair value</b>                        |                  |            |             |         |             |
| Investments                                                             |                  |            |             |         |             |
| Federal Government Securities                                           | 979,926,866      | -          | 979,926,866 | -       | 979,926,866 |
| Shares                                                                  | 20,510,813       | 20,510,813 | -           | -       | 20,510,813  |
| Non-Government Debt Securities                                          | 2,858,620        | -          | 2,858,620   | -       | 2,858,620   |
| Foreign Securities                                                      | 7,474,190        | -          | 7,474,190   | -       | 7,474,190   |
| <b>Financial assets - disclosed but not measured at fair value</b>      |                  |            |             |         |             |
| Investments (HTM, unlisted ordinary shares and associates)              | 25,447,046       | -          | -           | -       | -           |
| Cash and balances with treasury banks                                   | 132,053,041      | -          | -           | -       | -           |
| Balances with other banks                                               | 29,011,521       | -          | -           | -       | -           |
| Lendings to financial institutions                                      | 17,968,243       | -          | -           | -       | -           |
| Advances                                                                | 547,685,708      | -          | -           | -       | -           |
| Other assets                                                            | 52,518,097       | -          | -           | -       | -           |
| <b>Non - Financial Assets measured at fair value</b>                    |                  |            |             |         |             |
| Operating fixed assets (land and buildings)                             | 45,595,081       | -          | 45,595,081  | -       | 45,595,081  |
| Non-banking assets                                                      | 4,036,914        | -          | 4,036,914   | -       | 4,036,914   |
| <b>Off-balance sheet financial instruments - measured at fair value</b> |                  |            |             |         |             |
| Forward purchase of foreign exchange                                    | 172,137,589      | -          | 4,011,602   | -       | 4,011,602   |
| Forward sale of foreign exchange                                        | 155,508,653      | -          | 4,240,748   | -       | 4,240,748   |
| Derivatives purchase                                                    | 2,158,111        | -          | 517,033     | -       | 517,033     |
| Derivatives sale                                                        | 2,313,272        | -          | 513,343     | -       | 513,343     |

# Notes To The Consolidated Financial Statements

For the year ended December 31, 2020

|                                                                         | 2019           |            |             |         | Total       |
|-------------------------------------------------------------------------|----------------|------------|-------------|---------|-------------|
|                                                                         | Carrying value | Level 1    | Level 2     | Level 3 |             |
| (Rupees in '000)                                                        |                |            |             |         |             |
| <b>On balance sheet financial instruments</b>                           |                |            |             |         |             |
| <b>Financial assets - measured at fair value</b>                        |                |            |             |         |             |
| Investments                                                             |                |            |             |         |             |
| Federal Government Securities                                           | 691,477,045    | -          | 691,477,045 | -       | 691,477,045 |
| Shares                                                                  | 17,075,189     | 17,075,189 | -           | -       | 17,075,189  |
| Non-Government Debt Securities                                          | 2,424,102      | -          | 2,424,102   | -       | 2,424,102   |
| Foreign Securities                                                      | 3,663,065      | -          | 3,663,065   | -       | 3,663,065   |
| <b>Financial assets - disclosed but not measured at fair value</b>      |                |            |             |         |             |
| Investments (HTM, unlisted ordinary shares and associates)              |                |            |             |         |             |
|                                                                         | 42,802,189     | -          | -           | -       | -           |
| Cash and balances with treasury banks                                   | 142,957,358    | -          | -           | -       | -           |
| Balances with other banks                                               | 21,371,753     | -          | -           | -       | -           |
| Lendings to financial institutions                                      | 6,060,869      | -          | -           | -       | -           |
| Advances                                                                | 548,472,860    | -          | -           | -       | -           |
| Other assets                                                            | 58,219,618     | -          | -           | -       | -           |
| <b>Non - Financial Assets</b>                                           |                |            |             |         |             |
| <b>measured at fair value</b>                                           |                |            |             |         |             |
| Operating fixed assets (land and buildings)                             | 44,882,204     | -          | 44,882,204  | -       | 44,882,204  |
| Non-banking assets                                                      | 3,838,230      | -          | 3,838,230   | -       | 3,838,230   |
| <b>Off-balance sheet financial instruments - measured at fair value</b> |                |            |             |         |             |
| Forward purchase of foreign exchange                                    | 216,647,656    | -          | 4,142,227   | -       | 4,142,227   |
| Forward sale of foreign exchange                                        | 188,243,433    | -          | 3,352,404   | -       | 3,352,404   |
| Derivatives purchase                                                    | 5,176,612      | -          | 1,232,827   | -       | 1,232,827   |
| Derivatives sale                                                        | 5,068,194      | -          | 1,229,116   | -       | 1,229,116   |

The Group policy is to recognise transfers into and out of the different fair value hierarchy levels at the date the event or change in circumstances that caused the transfer occurred. There were no transfers between levels 1 and 2 during the year.

**(a) Financial instruments in level 1**

Financial instruments included in level 1 comprise of investments in listed ordinary shares and units of mutual funds.

**(b) Financial instruments in level 2**

Financial instruments included in level 2 comprise of Sukuk Bonds, Pakistan Investment Bonds, Market Treasury Bills, Term Finance certificates, FX options, Cross Currency Swaps, Interest Rate Swaps and Forward Exchange Contracts.

**(c) Financial instruments in level 3**

Currently, no financial instruments are classified in level 3.

# Notes To The Consolidated Financial Statements

For the year ended December 31, 2020

## 42 SEGMENT INFORMATION

### 42.1 Segment details with respect to business activities

The segment analysis with respect to business activity is as follows:

|                                        | 2020                 |                   |                    |                      |                       |                    |                   |                    |                      |                        |                      |
|----------------------------------------|----------------------|-------------------|--------------------|----------------------|-----------------------|--------------------|-------------------|--------------------|----------------------|------------------------|----------------------|
|                                        | Retail Banking       | Consumer Banking  | Corporate Banking  | Treasury             | International Banking | Islamic Banking    | Assets Management | Others             | Sub-total            | Elimination            | Total                |
|                                        | (Rupees in '000)     |                   |                    |                      |                       |                    |                   |                    |                      |                        |                      |
| <b>Profit &amp; Loss</b>               |                      |                   |                    |                      |                       |                    |                   |                    |                      |                        |                      |
| Net mark-up/return/profit              | (44,807,214)         | 2,788,656         | 28,085,051         | 83,819,922           | 1,448,075             | 4,395,446          | (6,607)           | 120,110            | 75,843,439           | -                      | 75,843,439           |
| Inter segment revenue - net            | 86,028,798           | (486,242)         | (22,380,468)       | (69,939,999)         | (171,994)             | -                  | -                 | 6,929,905          | -                    | -                      | -                    |
| Non mark-up / return / interest income | 6,306,651            | 2,118,001         | 3,282,442          | 5,618,895            | 813,588               | 678,163            | 833,565           | 190,310            | 19,841,605           | -                      | 19,841,605           |
| <b>Total Income</b>                    | <b>47,528,235</b>    | <b>4,420,415</b>  | <b>9,007,025</b>   | <b>19,498,818</b>    | <b>2,089,669</b>      | <b>5,073,599</b>   | <b>826,958</b>    | <b>7,240,325</b>   | <b>95,685,044</b>    | <b>-</b>               | <b>95,685,044</b>    |
| Segment direct expenses                | 20,460,118           | 1,462,911         | 586,415            | 368,025              | 1,309,898             | 4,665,250          | 407,873           | 9,776,222          | 39,036,712           | -                      | 39,036,712           |
| Inter segment expense allocation       | -                    | -                 | -                  | -                    | -                     | -                  | -                 | -                  | -                    | -                      | -                    |
| <b>Total expenses</b>                  | <b>20,460,118</b>    | <b>1,462,911</b>  | <b>586,415</b>     | <b>368,025</b>       | <b>1,309,898</b>      | <b>4,665,250</b>   | <b>407,873</b>    | <b>9,776,222</b>   | <b>39,036,712</b>    | <b>-</b>               | <b>39,036,712</b>    |
| Provisions                             | 2,306,248            | 113,643           | 2,763,155          | (31,111)             | 129,368               | 15,270             | -                 | 2,033,471          | 7,330,044            | -                      | 7,330,044            |
| <b>Profit before tax</b>               | <b>24,761,869</b>    | <b>2,843,861</b>  | <b>5,657,455</b>   | <b>19,161,904</b>    | <b>650,403</b>        | <b>393,079</b>     | <b>419,085</b>    | <b>(4,569,368)</b> | <b>49,318,288</b>    | <b>-</b>               | <b>49,318,288</b>    |
| <b>Balance Sheet</b>                   |                      |                   |                    |                      |                       |                    |                   |                    |                      |                        |                      |
| Cash and Bank balances                 | 58,362,119           | 317,242           | 394,030            | 64,577,425           | 21,166,578            | 14,868,799         | 25,853            | 1,352,516          | 161,064,562          | -                      | 161,064,562          |
| Investments                            | -                    | -                 | 10,578,310         | 978,209,256          | 14,571,071            | 27,617,997         | 1,269,444         | 3,971,457          | 1,036,217,535        | -                      | 1,036,217,535        |
| Net inter segment lending              | 1,050,376,236        | -                 | -                  | -                    | -                     | -                  | -                 | 202,001,071        | 1,252,377,307        | (1,252,377,307)        | -                    |
| Lendings to financial institutions     | -                    | -                 | -                  | 6,137,258            | 11,002,195            | 828,790            | -                 | 17,968,243         | -                    | -                      | 17,968,243           |
| Advances - performing                  | 94,735,206           | 26,845,772        | 313,362,719        | -                    | 21,361,572            | 84,165,115         | 5,260             | 432,897            | 540,908,541          | -                      | 540,908,541          |
| - non performing - net                 | 171,804              | 177,613           | 2,382              | -                    | 4,973,954             | 731,076            | -                 | 720,338            | 6,777,167            | -                      | 6,777,167            |
| Others                                 | 35,621,546           | 2,370,727         | 23,382,913         | 12,206,991           | 4,577,833             | 12,079,087         | 986,042           | 37,115,208         | 128,340,347          | -                      | 128,340,347          |
| <b>Total Assets</b>                    | <b>1,239,266,911</b> | <b>29,711,354</b> | <b>347,720,354</b> | <b>1,061,130,930</b> | <b>77,653,203</b>     | <b>140,290,864</b> | <b>2,286,599</b>  | <b>245,593,487</b> | <b>3,143,653,702</b> | <b>(1,252,377,307)</b> | <b>1,891,276,395</b> |
| Borrowings                             | 58,910,004           | -                 | 10,694,773         | 90,718,570           | 3,330,124             | 20,596,773         | -                 | 327,096            | 184,577,340          | -                      | 184,577,340          |
| Deposits and other accounts            | 1,147,251,222        | 21,263,015        | 65,961,390         | -                    | 55,009,174            | 99,253,160         | -                 | -                  | 1,388,737,961        | -                      | 1,388,737,961        |
| Net inter segment borrowing            | -                    | 4,816,853         | 252,358,835        | 969,573,590          | 13,301,145            | 10,727,772         | 1,599,112         | 1,252,377,307      | (1,252,377,307)      | -                      | -                    |
| Others                                 | 33,105,685           | 3,631,486         | 18,705,356         | 838,770              | 6,012,760             | 9,713,159          | 687,487           | 52,275,008         | 124,969,711          | -                      | 124,969,711          |
| <b>Total liabilities</b>               | <b>1,239,266,911</b> | <b>29,711,354</b> | <b>347,720,354</b> | <b>1,061,130,930</b> | <b>77,653,203</b>     | <b>140,290,864</b> | <b>2,286,599</b>  | <b>52,602,104</b>  | <b>2,950,662,319</b> | <b>(1,252,377,307)</b> | <b>1,698,285,012</b> |
| Equity                                 | -                    | -                 | -                  | -                    | -                     | -                  | -                 | 192,991,383        | 192,991,383          | -                      | 192,991,383          |
| <b>Total Equity &amp; liabilities</b>  | <b>1,239,266,911</b> | <b>29,711,354</b> | <b>347,720,354</b> | <b>1,061,130,930</b> | <b>77,653,203</b>     | <b>140,290,864</b> | <b>2,286,599</b>  | <b>245,593,487</b> | <b>3,143,653,702</b> | <b>(1,252,377,307)</b> | <b>1,891,276,395</b> |
| Contingencies & Commitments            | 55,974,597           | -                 | 288,001,956        | 320,068,131          | 20,930,195            | 29,021,132         | -                 | 26,379,292         | 740,375,303          | -                      | 740,375,303          |
| <b>2019</b>                            |                      |                   |                    |                      |                       |                    |                   |                    |                      |                        |                      |
|                                        | Retail Banking       | Consumer Banking  | Corporate Banking  | Treasury             | International Banking | Islamic Banking    | Assets Management | Others             | Sub-total            | Elimination            | Total                |
|                                        | (Rupees in '000)     |                   |                    |                      |                       |                    |                   |                    |                      |                        |                      |
| <b>Profit &amp; Loss</b>               |                      |                   |                    |                      |                       |                    |                   |                    |                      |                        |                      |
| Net mark-up/return/profit              | (50,496,018)         | 3,938,893         | 36,263,272         | 68,147,338           | 1,762,729             | 3,993,758          | (2,059)           | 110,178            | 63,718,091           | -                      | 63,718,091           |
| Inter segment revenue - net            | 99,832,569           | (2,583,003)       | (31,413,118)       | (73,135,260)         | (180,860)             | -                  | -                 | 7,479,672          | -                    | -                      | -                    |
| Non mark-up / return / interest income | 6,318,966            | 2,111,319         | 3,414,776          | 3,519,577            | 782,895               | 343,319            | 722,042           | 644,430            | 17,857,314           | -                      | 17,857,314           |
| <b>Total Income</b>                    | <b>55,655,507</b>    | <b>3,467,209</b>  | <b>8,264,930</b>   | <b>(1,468,345)</b>   | <b>2,384,764</b>      | <b>4,337,077</b>   | <b>719,983</b>    | <b>8,234,280</b>   | <b>81,575,405</b>    | <b>-</b>               | <b>81,575,405</b>    |
| Segment direct expenses                | 21,762,153           | 1,330,299         | 525,336            | 311,976              | 1,284,816             | 4,503,022          | 499,336           | 8,531,282          | 38,748,220           | -                      | 38,748,220           |
| Inter segment expense allocation       | -                    | -                 | -                  | -                    | -                     | -                  | -                 | -                  | -                    | -                      | -                    |
| <b>Total expenses</b>                  | <b>21,762,153</b>    | <b>1,330,299</b>  | <b>525,336</b>     | <b>311,976</b>       | <b>1,284,816</b>      | <b>4,503,022</b>   | <b>499,336</b>    | <b>8,531,282</b>   | <b>38,748,220</b>    | <b>-</b>               | <b>38,748,220</b>    |
| Provisions                             | 345,610              | (34,217)          | 947,291            | 2,772,041            | 75,176                | 199,814            | -                 | (1,632,123)        | 2,673,592            | -                      | 2,673,592            |
| <b>Profit before tax</b>               | <b>33,547,744</b>    | <b>2,171,127</b>  | <b>6,792,303</b>   | <b>(4,552,362)</b>   | <b>1,004,772</b>      | <b>(365,759)</b>   | <b>220,647</b>    | <b>1,335,121</b>   | <b>40,153,593</b>    | <b>-</b>               | <b>40,153,593</b>    |
| <b>Balance Sheet</b>                   |                      |                   |                    |                      |                       |                    |                   |                    |                      |                        |                      |
| Cash and Bank balances                 | 50,154,942           | 21,483            | 676,139            | 66,572,277           | 28,149,362            | 19,075,532         | 28,347            | 651,029            | 164,329,111          | -                      | 164,329,111          |
| Investments                            | -                    | -                 | 10,638,292         | 710,593,710          | 15,011,692            | 16,309,796         | 1,055,226         | 3,832,874          | 757,441,590          | -                      | 757,441,590          |
| Net inter segment lending              | 940,015,023          | -                 | -                  | -                    | -                     | -                  | -                 | 164,180,279        | 1,104,195,302        | (1,104,195,302)        | -                    |
| Lendings to financial institutions     | -                    | -                 | -                  | -                    | 209,206               | 5,851,663          | -                 | -                  | 6,060,869            | -                      | 6,060,869            |
| Advances - performing                  | 98,464,054           | 24,342,756        | 341,191,287        | -                    | 25,190,939            | 50,931,880         | 5,169             | 478,850            | 540,604,935          | -                      | 540,604,935          |
| - non performing - net                 | 1,074,787            | 113,148           | 1,237,494          | -                    | 4,836,865             | 378,087            | -                 | 227,544            | 7,867,925            | -                      | 7,867,925            |
| Others                                 | 34,759,967           | 1,882,259         | 25,393,004         | 13,804,785           | 2,368,787             | 11,538,184         | 1,060,496         | 45,102,959         | 135,910,441          | -                      | 135,910,441          |
| <b>Total Assets</b>                    | <b>1,124,468,773</b> | <b>26,359,646</b> | <b>379,136,216</b> | <b>789,970,772</b>   | <b>75,766,851</b>     | <b>104,085,142</b> | <b>2,149,238</b>  | <b>214,473,535</b> | <b>2,716,410,173</b> | <b>(1,104,195,302)</b> | <b>1,612,214,871</b> |
| Borrowings                             | 45,355,966           | -                 | 7,057,504          | 32,270,471           | 3,520,222             | 4,127,525          | -                 | 528,280            | 92,859,988           | -                      | 92,859,988           |
| Deposits and other accounts            | 1,033,790,838        | -                 | 55,425,048         | -                    | 55,523,628            | 81,853,511         | -                 | -                  | 1,226,593,025        | -                      | 1,226,593,025        |
| Net inter segment borrowing            | -                    | 24,124,908        | 299,650,838        | 755,967,249          | 12,464,722            | 10,466,801         | 1,520,784         | -                  | 1,104,195,302        | (1,104,195,302)        | -                    |
| Others                                 | 45,321,969           | 2,234,738         | 17,002,826         | 1,733,052            | 4,258,279             | 7,637,305          | 628,454           | 42,598,438         | 121,415,061          | -                      | 121,415,061          |
| <b>Total liabilities</b>               | <b>1,124,468,773</b> | <b>26,359,646</b> | <b>379,136,216</b> | <b>789,970,772</b>   | <b>75,766,851</b>     | <b>104,085,142</b> | <b>2,149,238</b>  | <b>43,126,718</b>  | <b>2,545,063,356</b> | <b>(1,104,195,302)</b> | <b>1,440,868,054</b> |
| Equity                                 | -                    | -                 | -                  | -                    | -                     | -                  | -                 | 171,346,817        | 171,346,817          | -                      | 171,346,817          |
| <b>Total Equity &amp; liabilities</b>  | <b>1,124,468,773</b> | <b>26,359,646</b> | <b>379,136,216</b> | <b>789,970,772</b>   | <b>75,766,851</b>     | <b>104,085,142</b> | <b>2,149,238</b>  | <b>214,473,535</b> | <b>2,716,410,173</b> | <b>(1,104,195,302)</b> | <b>1,612,214,871</b> |
| Contingencies & Commitments            | 48,973,361           | -                 | 282,455,692        | 496,556,621          | 14,015,586            | 18,397,458         | -                 | 25,057,324         | 865,456,042          | -                      | 865,456,042          |

# Notes To The Consolidated Financial Statements

For the year ended December 31, 2020

## 42.2 Segment details with respect to geographical locations

### GEOGRAPHICAL SEGMENT ANALYSIS

|                                        | 2020             |            |             |         |               |              |               |
|----------------------------------------|------------------|------------|-------------|---------|---------------|--------------|---------------|
|                                        | Pakistan         | South Asia | Middle East | Eurasia | Sub-total     | Eliminations | Total         |
|                                        | (Rupees in '000) |            |             |         |               |              |               |
| <b>Profit &amp; Loss</b>               |                  |            |             |         |               |              |               |
| Net mark-up/return/profit              | 74,278,382       | 862,868    | 584,128     | 118,061 | 75,843,439    | -            | 75,843,439    |
| Inter segment revenue - net            | 111,160          | (95,930)   | (15,230)    | -       | -             | -            | -             |
| Non mark-up / return / interest income | 19,024,163       | 265,900    | 543,982     | 7,560   | 19,841,605    | -            | 19,841,605    |
| Total Income                           | 93,413,705       | 1,032,838  | 1,112,880   | 125,621 | 95,685,044    | -            | 95,685,044    |
| Segment direct expenses                | 37,664,604       | 650,469    | 656,321     | 65,318  | 39,036,712    | -            | 39,036,712    |
| Inter segment expense allocation       | -                | -          | -           | -       | -             | -            | -             |
| Total expenses                         | 37,664,604       | 650,469    | 656,321     | 65,318  | 39,036,712    | -            | 39,036,712    |
| Provisions                             | 7,199,068        | 78,422     | 50,946      | 1,608   | 7,330,044     | -            | 7,330,044     |
| Profit before tax                      | 48,550,033       | 303,947    | 405,613     | 58,695  | 49,318,288    | -            | 49,318,288    |
| <b>Balance Sheet</b>                   |                  |            |             |         |               |              |               |
| Cash and Bank balances                 | 140,214,571      | 1,556,335  | 19,289,016  | 4,640   | 161,064,562   | -            | 161,064,562   |
| Investments                            | 1,021,646,465    | 10,519,130 | 4,051,940   | -       | 1,036,217,535 | -            | 1,036,217,535 |
| Net inter segment lendings             | 12,319,043       | -          | -           | -       | 12,319,043    | (12,319,043) | -             |
| Lendings to financial institutions     | 6,966,047        | 1,864,193  | 9,138,003   | -       | 17,968,243    | -            | 17,968,243    |
| Advances - performing                  | 518,887,766      | 12,402,421 | 8,863,250   | 755,104 | 540,908,541   | -            | 540,908,541   |
| - non performing - net                 | 6,765,263        | 11,904     | -           | -       | 6,777,167     | -            | 6,777,167     |
| Others                                 | 123,724,991      | 4,054,777  | 496,834     | 63,745  | 128,340,347   | -            | 128,340,347   |
| <b>Total Assets</b>                    | 1,830,524,146    | 30,408,760 | 41,839,043  | 823,489 | 1,903,595,438 | (12,319,043) | 1,891,276,395 |
| Borrowings                             | 180,920,122      | 1,470,384  | 1,859,738   | 327,096 | 184,577,340   | -            | 184,577,340   |
| Deposits and other accounts            | 1,336,595,320    | 18,298,522 | 33,844,119  | -       | 1,388,737,961 | -            | 1,388,737,961 |
| Net inter segment borrowing            | -                | 6,525,907  | 5,793,136   | -       | 12,319,043    | (12,319,043) | -             |
| Others                                 | 120,442,311      | 4,113,947  | 342,050     | 71,403  | 124,969,711   | -            | 124,969,711   |
| <b>Total liabilities</b>               | 1,637,957,753    | 30,408,760 | 41,839,043  | 398,499 | 1,710,604,055 | (12,319,043) | 1,698,285,012 |
| Equity                                 | 192,566,393      | -          | -           | 424,990 | 192,991,383   | -            | 192,991,383   |
| <b>Total Equity &amp; liabilities</b>  | 1,830,524,146    | 30,408,760 | 41,839,043  | 823,489 | 1,903,595,438 | (12,319,043) | 1,891,276,395 |
| <b>Contingencies &amp; Commitments</b> | 719,445,109      | 17,479,001 | 3,451,193   | -       | 740,375,303   | -            | 740,375,303   |
|                                        | 2019             |            |             |         |               |              |               |
|                                        | Pakistan         | South Asia | Middle East | Eurasia | Sub-total     | Eliminations | Total         |
|                                        | (Rupees in '000) |            |             |         |               |              |               |
| <b>Profit &amp; Loss</b>               |                  |            |             |         |               |              |               |
| Net mark-up/return/profit              | 61,849,240       | 1,085,296  | 675,651     | 107,904 | 63,718,091    | -            | 63,718,091    |
| Inter segment revenue - net            | 107,447          | (119,613)  | 12,166      | -       | -             | -            | -             |
| Non mark-up / return / interest income | 17,088,129       | 251,485    | 512,276     | 5,424   | 17,857,314    | -            | 17,857,314    |
| Total Income                           | 79,044,816       | 1,217,168  | 1,200,093   | 113,328 | 81,575,405    | -            | 81,575,405    |
| Segment direct expenses                | 37,396,274       | 737,142    | 552,539     | 62,265  | 38,748,220    | -            | 38,748,220    |
| Inter segment expense allocation       | -                | -          | -           | -       | -             | -            | -             |
| Total expenses                         | 37,396,274       | 737,142    | 552,539     | 62,265  | 38,748,220    | -            | 38,748,220    |
| Provisions                             | 2,588,709        | 29,232     | 65,407      | (9,756) | 2,673,592     | -            | 2,673,592     |
| Profit before tax                      | 39,059,833       | 450,794    | 582,147     | 60,819  | 40,153,593    | -            | 40,153,593    |
| <b>Balance Sheet</b>                   |                  |            |             |         |               |              |               |
| Cash and Bank balances                 | 136,384,595      | 2,169,276  | 25,769,312  | 5,928   | 164,329,111   | -            | 164,329,111   |
| Investments                            | 742,429,899      | 5,571,042  | 9,440,649   | -       | 757,441,590   | -            | 757,441,590   |
| Net inter segment lendings             | 11,906,306       | -          | -           | -       | 11,906,306    | (11,906,306) | -             |
| Lendings to financial institutions     | 5,851,663        | 209,206    | -           | -       | 6,060,869     | -            | 6,060,869     |
| Advances - performing                  | 514,539,167      | 17,771,048 | 7,401,837   | 892,883 | 540,604,935   | -            | 540,604,935   |
| - non performing - net                 | 7,838,277        | 29,648     | -           | -       | 7,867,925     | -            | 7,867,925     |
| Others                                 | 133,505,520      | 2,193,220  | 173,639     | 38,062  | 135,910,441   | -            | 135,910,441   |
| <b>Total Assets</b>                    | 1,552,455,427    | 27,943,440 | 42,785,437  | 936,873 | 1,624,121,177 | (11,906,306) | 1,612,214,871 |
| Borrowings                             | 88,811,466       | 845,703    | 2,674,519   | 528,280 | 92,859,968    | -            | 92,859,968    |
| Deposits and other accounts            | 1,173,585,208    | 18,431,297 | 34,576,520  | -       | 1,226,593,025 | -            | 1,226,593,025 |
| Net inter segment borrowing            | -                | 6,151,041  | 5,368,302   | 366,963 | 11,906,306    | (11,906,306) | -             |
| Others                                 | 118,711,936      | 2,515,399  | 146,096     | 41,630  | 121,415,061   | -            | 121,415,061   |
| <b>Total liabilities</b>               | 1,381,108,610    | 27,943,440 | 42,785,437  | 936,873 | 1,452,774,360 | (11,906,306) | 1,440,868,054 |
| Equity                                 | 171,346,817      | -          | -           | -       | 171,346,817   | -            | 171,346,817   |
| <b>Total Equity &amp; liabilities</b>  | 1,552,455,427    | 27,943,440 | 42,785,437  | 936,873 | 1,624,121,177 | (11,906,306) | 1,612,214,871 |
| <b>Contingencies &amp; Commitments</b> | 851,440,456      | 9,436,548  | 4,579,038   | -       | 865,456,042   | -            | 865,456,042   |

42.3 Transactions between reportable segments are based on an appropriate transfer pricing mechanism using agreed rates. Furthermore, segment assets and liabilities include inter segment balances. Costs which are not allocated to segments are included in the Head office. Income taxes are managed at bank level and are not allocated to operating segments.

42.4 No revenue from transactions with a single external customer or counterparty amounted to 10% or more of the Bank's total revenue in 2020 or 2019.

# Notes To The Consolidated Financial Statements

For the year ended December 31, 2020

## 43 RELATED PARTY TRANSACTIONS

The Group has related party relationship with associates, employee benefit plans, its directors and key management personnel and their close family members. The detail of associates are stated in note 10.11 to the consolidated financial statements.

The Group enters into transactions with related parties in the ordinary course of business and on substantially the same terms as for comparable transactions with person of similar standing. Contributions to and accruals in respect of staff retirement benefits and other benefit plans are made in accordance with the actuarial valuations / terms of the contribution plan. Remuneration to the executives / officers is determined in accordance with the terms of their appointment. Remuneration to Chief Executive, Directors and Executives is disclosed in note 40 to the consolidated financial statements.

Details of transactions with related parties during the year, other than those which have been disclosed elsewhere in these consolidated financial statements are as follows:

|                                                         | 2020             |                                               |            |                       |           | 2019                                          |            |                       |             |                                               |            |                       |
|---------------------------------------------------------|------------------|-----------------------------------------------|------------|-----------------------|-----------|-----------------------------------------------|------------|-----------------------|-------------|-----------------------------------------------|------------|-----------------------|
|                                                         | Directors        | Key management personnel and shariah advisors | Associates | Other related Parties | Directors | Key management personnel and shariah advisors | Associates | Other related parties | Directors   | Key management personnel and shariah advisors | Associates | Other related parties |
|                                                         | (Rupees in '000) |                                               |            |                       |           |                                               |            |                       |             |                                               |            |                       |
| <b>Balances with other banks</b>                        |                  |                                               |            |                       |           |                                               |            |                       |             |                                               |            |                       |
| In current accounts                                     | -                | -                                             | -          | -                     | -         | -                                             | -          | -                     | -           | -                                             | -          | 14,389                |
|                                                         | -                | -                                             | -          | -                     | -         | -                                             | -          | -                     | -           | -                                             | -          | 14,389                |
| <b>Investments</b>                                      |                  |                                               |            |                       |           |                                               |            |                       |             |                                               |            |                       |
| Opening balance                                         | -                | -                                             | 4,275,658  | 1,283,438             | -         | -                                             | -          | 4,019,526             | -           | -                                             | -          | 1,283,998             |
| Equity method adjustments                               | -                | -                                             | 203,702    | -                     | -         | -                                             | -          | 256,132               | -           | -                                             | -          | -                     |
| Investment made during the year                         | -                | -                                             | -          | 10,609,883            | -         | -                                             | -          | -                     | -           | -                                             | -          | 8,906,732             |
| Investment disposed off during the year                 | -                | -                                             | -          | (10,516,123)          | -         | -                                             | -          | -                     | -           | -                                             | -          | (8,907,292)           |
| Closing balance                                         | -                | -                                             | 4,479,360  | 1,377,198             | -         | -                                             | -          | 4,275,658             | -           | -                                             | -          | 1,283,438             |
|                                                         | -                | -                                             | -          | 5,000                 | -         | -                                             | -          | -                     | -           | -                                             | -          | 5,000                 |
| <b>Provision for diminution in value of investments</b> |                  |                                               |            |                       |           |                                               |            |                       |             |                                               |            |                       |
|                                                         | -                | -                                             | -          | -                     | -         | -                                             | -          | -                     | -           | -                                             | -          | -                     |
| <b>Advances</b>                                         |                  |                                               |            |                       |           |                                               |            |                       |             |                                               |            |                       |
| Opening balance                                         | 1,722            | 223,338                                       | -          | 1,101,457             | 658       | 253,945                                       | -          | -                     | 1,540,791   |                                               |            |                       |
| Addition / exchange adjustment during the year          | 18,202           | 95,758                                        | -          | 3,282,404             | 29,148    | 77,133                                        | -          | -                     | 4,275,492   |                                               |            |                       |
| Repaid during the year                                  | (18,882)         | (40,170)                                      | -          | (3,365,263)           | (28,084)  | (84,375)                                      | -          | -                     | (3,920,116) |                                               |            |                       |
| Transfer in / (out)                                     | -                | (3,808)                                       | -          | 244,397               | -         | (23,365)                                      | -          | -                     | (794,710)   |                                               |            |                       |
| Closing balance                                         | 1,042            | 275,118                                       | -          | 1,262,995             | 1,722     | 223,338                                       | -          | -                     | 1,101,457   |                                               |            |                       |

# Notes To The Consolidated Financial Statements

For the year ended December 31, 2020

|                                                        | 2020             |                                               |              |                       |              | 2019        |                                               |              |                       |  |
|--------------------------------------------------------|------------------|-----------------------------------------------|--------------|-----------------------|--------------|-------------|-----------------------------------------------|--------------|-----------------------|--|
|                                                        | Directors        | Key management personnel and shariah advisors | Associates   | Other related Parties |              | Directors   | Key management personnel and shariah advisors | Associates   | Other related parties |  |
|                                                        | (Rupees in '000) |                                               |              |                       |              |             |                                               |              |                       |  |
| <b>Other Assets</b>                                    |                  |                                               |              |                       |              |             |                                               |              |                       |  |
| Markup receivable                                      | -                | 3,149                                         | 895          | 25,883                | -            | 4,948       | -                                             | -            | 21,627                |  |
| Advances, deposits, advance rent and other prepayments | -                | 2,393                                         | 310,504      | 208,094               | -            | 587         | 246,720                                       | -            | 612,811               |  |
| Receivable from Pension Fund                           | -                | -                                             | -            | 3,370,179             | -            | -           | -                                             | -            | 3,605,121             |  |
| <b>Borrowings</b>                                      |                  |                                               |              |                       |              |             |                                               |              |                       |  |
| Opening balance                                        | -                | -                                             | -            | 69,166                | -            | -           | -                                             | -            | -                     |  |
| Borrowings / exchange adjustment during the year       | -                | -                                             | -            | 7,973                 | -            | -           | -                                             | -            | 144,166               |  |
| Settled during the year                                | -                | -                                             | -            | -                     | -            | -           | -                                             | -            | (75,000)              |  |
| Closing balance                                        | -                | -                                             | -            | 77,139                | -            | -           | -                                             | -            | 69,166                |  |
| <b>Deposits and other accounts</b>                     |                  |                                               |              |                       |              |             |                                               |              |                       |  |
| Opening balance                                        | 602,381          | 194,366                                       | 4,013,859    | 5,124,551             | 3,745,457    | 202,014     | 3,696,154                                     | 3,245,407    |                       |  |
| Received during the year                               | 669,282          | 3,851,770                                     | 44,628,206   | 99,003,416            | 9,889,584    | 1,152,025   | 22,234,251                                    | 78,846,758   |                       |  |
| Withdrawn during the year                              | (969,533)        | (3,257,022)                                   | (43,469,978) | (97,417,931)          | (13,025,336) | (1,139,761) | (21,916,546)                                  | (77,299,321) |                       |  |
| Transfer in / (out) - net                              | -                | (45,994)                                      | -            | (648,365)             | (7,324)      | (19,912)    | -                                             | 331,707      |                       |  |
| Closing balance                                        | 302,130          | 743,120                                       | 5,172,087    | 6,061,671             | 602,381      | 194,366     | 4,013,859                                     | 5,124,551    |                       |  |
| <b>Other Liabilities</b>                               |                  |                                               |              |                       |              |             |                                               |              |                       |  |
| Markup payable                                         | 50               | 3,159                                         | 42,549       | 16,004                | 7,263        | 818         | 50,535                                        | 75,118       |                       |  |
| Accrued expenses and other payable                     | -                | -                                             | 62,624       | 18,002                | 15,326       | 2,640       | 62,402                                        | 7,629        |                       |  |
| Payable to MCB Employee Security Services              | -                | -                                             | -            | 27,031                | -            | -           | -                                             | 24,565       |                       |  |
| <b>Contingencies and Commitments</b>                   |                  |                                               |              |                       |              |             |                                               |              |                       |  |
| Commitments and contingent liabilities - outstanding   | -                | -                                             | 10,512       | 2,859,661             | -            | -           | 10,444                                        | 2,445,772    |                       |  |

# Notes To The Consolidated Financial Statements

For the year ended December 31, 2020

2019

2020

|                                                                                  | Directors | Key management personnel and shariah advisors | Associates | Other related parties | Directors | Key management personnel and shariah advisors | Associates | Other related parties |
|----------------------------------------------------------------------------------|-----------|-----------------------------------------------|------------|-----------------------|-----------|-----------------------------------------------|------------|-----------------------|
| (Rupees in '000)                                                                 |           |                                               |            |                       |           |                                               |            |                       |
| <b>Income</b>                                                                    |           |                                               |            |                       |           |                                               |            |                       |
| Markup / return / interest earned                                                | -         | 18,298                                        | 1,809      | 127,475               | -         | 16,843                                        | -          | 87,124                |
| Fee and commission income                                                        | -         | -                                             | 1,177,371  | 51,520                | -         | 27                                            | 1,301,954  | 218,005               |
| Dividend income                                                                  | -         | -                                             | 192,500    | 61,949                | -         | -                                             | 175,000    | 70,408                |
| Gain on forward foreign exchange contracts matured during the year               | -         | -                                             | -          | 53,120                | -         | -                                             | -          | 12,850                |
| Net gain on sale of securities                                                   | 72        | 40                                            | 3,836      | 6,485                 | -         | -                                             | 281        | 10,990                |
| Gain on sale of assets                                                           | -         | 98                                            | -          | 516                   | -         | 186                                           | -          | -                     |
| Rent income and reimbursement of other expenses                                  | -         | 18                                            | 8,808      | 56,012                | -         | -                                             | 8,485      | 44,812                |
| Management fee and Advisory income                                               | -         | -                                             | -          | 698,356               | -         | -                                             | -          | 677,735               |
| <b>Expense</b>                                                                   |           |                                               |            |                       |           |                                               |            |                       |
| Markup / return / interest expensed                                              | 30,257    | 43,279                                        | 223,767    | 307,205               | 145,454   | 38,562                                        | 218,029    | 395,520               |
| <b>Other Operating expenses</b>                                                  |           |                                               |            |                       |           |                                               |            |                       |
| Cleaning expenses paid to NIFT                                                   | -         | -                                             | -          | 166,175               | -         | -                                             | -          | 152,009               |
| Contribution to provident fund                                                   | -         | -                                             | -          | 518,600               | -         | -                                             | -          | 479,670               |
| Rent expenses                                                                    | -         | -                                             | 42,264     | 53,224                | -         | -                                             | 21,347     | 45,055                |
| Cash sorting expenses                                                            | -         | -                                             | -          | 114,845               | -         | -                                             | -          | 160,766               |
| Stationery expenses                                                              | -         | -                                             | -          | 244,697               | -         | -                                             | -          | 288,411               |
| Security guards expenses                                                         | -         | -                                             | -          | 381,267               | -         | -                                             | -          | 414,106               |
| Remuneration to key executives, shariah advisors and non-executive directors fee | 177,166   | 708,229                                       | -          | -                     | 165,579   | 523,315                                       | 258,190    | -                     |
| Outsourcing service expenses                                                     | -         | -                                             | 275,517    | -                     | -         | -                                             | -          | -                     |
| Donation Expense                                                                 | -         | -                                             | -          | 95,000                | -         | -                                             | -          | -                     |
| E-dividend processing fee and CDC charges                                        | -         | -                                             | -          | 4,757                 | -         | -                                             | -          | 5,968                 |
| Travelling expenses                                                              | -         | -                                             | -          | 38,507                | -         | -                                             | -          | 40,218                |
| Hotel stay expenses                                                              | -         | -                                             | -          | 3,410                 | -         | -                                             | -          | -                     |
| Repair and maintenance charges                                                   | -         | -                                             | -          | 1,989                 | -         | -                                             | -          | 2,125                 |
| Advertisement expenses                                                           | -         | -                                             | -          | 7,308                 | -         | -                                             | -          | 12,934                |
| Miscellaneous expenses and payments                                              | -         | -                                             | -          | 3,243                 | -         | 850                                           | -          | 3,023                 |
| Selling and Marketing                                                            | -         | -                                             | -          | 287,916               | -         | -                                             | -          | 153,648               |
| Sharia Fee Paid                                                                  | -         | -                                             | -          | 2,458                 | -         | -                                             | -          | 9,147                 |
| Insurance premium-net of refund                                                  | -         | -                                             | 646,676    | 116,502               | -         | -                                             | 719,873    | 106,825               |
| Insurance claim settled                                                          | -         | -                                             | 46,067     | 6,420                 | -         | -                                             | 57,566     | 291                   |
| <b>Other Transactions</b>                                                        |           |                                               |            |                       |           |                                               |            |                       |
| Proceeds from sale of assets                                                     | -         | 399                                           | -          | -                     | -         | 466                                           | -          | -                     |
| Purchase of fixed assets                                                         | -         | -                                             | 3,277      | 6,150                 | -         | -                                             | 46,339     | 20,003                |
| Sale of government securities                                                    | 268,847   | 124,304                                       | 5,740,348  | 8,592,672             | 203,735   | 94,105                                        | 6,043,338  | 22,634,697            |
| Purchase of government securities                                                | 19,827    | 999                                           | 1,232,917  | 653,148               | -         | 58,956                                        | 6,410,544  | 17,302,184            |
| Forward exchange contracts matured during the year                               | -         | -                                             | -          | 11,446,226            | -         | -                                             | -          | 24,426,964            |
| Insurance claim paid to related party                                            | -         | -                                             | -          | 2,100,927             | -         | -                                             | -          | 2,198,407             |
| Letter of Guarantee and credit issued                                            | -         | -                                             | -          | -                     | -         | -                                             | -          | -                     |

The Chairman has been provided with free use of the Group maintained car. The Chief Executive and certain executives are provided with free use of the Group maintained cars and household equipment in accordance with the terms of their employment.



## Notes To The Consolidated Financial Statements

For the year ended December 31, 2020

|    |                                                                      | 2020               | 2019               |
|----|----------------------------------------------------------------------|--------------------|--------------------|
|    |                                                                      | (Rupees in '000)   |                    |
| 44 | <b>CAPITAL ADEQUACY, LEVERAGE RATIO &amp; LIQUIDITY REQUIREMENTS</b> |                    |                    |
|    | <b>44.1 Capital Adequacy</b>                                         |                    |                    |
|    | <b>Minimum Capital Requirement (MCR):</b>                            |                    |                    |
|    | Paid-up capital (net of losses)                                      | 11,850,600         | 11,850,600         |
|    | <b>Capital Adequacy Ratio (CAR):</b>                                 |                    |                    |
|    | Eligible Common Equity Tier 1 (CET 1) Capital                        | 149,417,496        | 132,504,188        |
|    | Eligible Additional Tier 1 (ADT 1) Capital                           | -                  | -                  |
|    | Total Eligible Tier 1 Capital                                        | 149,417,496        | 132,504,188        |
|    | Eligible Tier 2 Capital                                              | 36,710,001         | 28,503,091         |
|    | <b>Total Eligible Capital (Tier 1 + Tier 2)</b>                      | <b>186,127,497</b> | <b>161,007,279</b> |
|    | <b>Risk Weighted Assets (RWAs):</b>                                  |                    |                    |
|    | Credit Risk                                                          | 668,413,516        | 662,366,497        |
|    | Market Risk                                                          | 128,392,302        | 113,394,030        |
|    | Operational Risk                                                     | 148,348,258        | 126,966,330        |
|    | Total                                                                | 945,154,076        | 902,726,857        |
|    | <b>Common Equity Tier 1 Capital Adequacy ratio</b>                   | <b>15.81%</b>      | <b>14.68%</b>      |
|    | <b>Tier 1 Capital Adequacy Ratio</b>                                 | <b>15.81%</b>      | <b>14.68%</b>      |
|    | <b>Total Capital Adequacy Ratio</b>                                  | <b>19.69%</b>      | <b>17.84%</b>      |

The SBP through its BSD Circular No. 07 dated April 15, 2009 has prescribed the minimum paid up capital (net of losses) for all locally incorporated banks of Rs. 10 billion. The paid up capital of the Holding company for the year ended December 31, 2020 stood at Rs. 11.851 billion and is in compliance with the SBP requirements. Further, under Basel III instructions, banks are required to maintain minimum Capital Adequacy Ratio (CAR) of 11.50% (including a capital conservation buffer of 1.5% which has been revised downwards from 2.5% as per BPRD Circular No. 12 dated March 26, 2020), Common Equity Tier 1 (CET 1) ratio of 6.0% and Tier 1 ratio of 7.50% as at December 31, 2020. The Group is fully compliant with prescribed ratios.

Under the current capital adequacy regulations, credit risk and market risk exposures are measured using the Standardized Approach and operational risk is measured using the Basic Indicator Approach. Credit risk mitigants are also applied against the Group's exposures based on eligible collateral under simple approach.

|  |                                  | 2020             | 2019          |
|--|----------------------------------|------------------|---------------|
|  |                                  | (Rupees in '000) |               |
|  | <b>44.2 Leverage Ratio (LR):</b> |                  |               |
|  | Eligible Tier-1 Capital          | 149,417,496      | 132,504,188   |
|  | Total Exposures                  | 2,323,456,613    | 2,037,241,480 |
|  | Leverage Ratio                   | 6.43%            | 6.50%         |

# Notes To The Consolidated Financial Statements

For the year ended December 31, 2020

|                                         | 2020             | 2019          |
|-----------------------------------------|------------------|---------------|
|                                         | (Rupees in '000) |               |
| <b>44.3 Liquidity Requirements</b>      |                  |               |
| <b>Liquidity Coverage Ratio (LCR):</b>  |                  |               |
| Total High Quality Liquid Assets        | 962,045,524      | 734,587,045   |
| Total Net Cash Outflow                  | 415,665,992      | 379,626,249   |
| Liquidity Coverage Ratio                | 231.45%          | 193.50%       |
| <b>Net Stable Funding Ratio (NSFR):</b> |                  |               |
| Total Available Stable Funding          | 1,212,910,470    | 1,045,877,006 |
| Total Required Stable Funding           | 715,405,667      | 745,689,676   |
| Net Stable Funding Ratio                | 169.54%          | 140.26%       |

The full disclosures on the Capital Adequacy, Leverage Ratio & Liquidity Requirements as per SBP instructions issued from time to time are available at <https://www.mcb.com.pk/investor-relations/capital-adequacy-statements>.

## 45 RISK MANAGEMENT

Risk is an inherent part of banking business activities. The risk management framework and governance structure of Groups helps to mitigate and counter any foreseeable risk in its various lines of business. Risk awareness forms an integral part of strategic and operational activities of risk management. Through its Global Risk Management Policy, Group sets the best course of action under uncertainty by identifying, prioritizing, mitigating and monitoring risk issues, with the goal of enhancing shareholders' value. Group's risk management structure is based on the following five guiding principles:

- Optimizing risk/return in a controlled manner
- Establishing clear responsibility and accountability
- Establishing independent and properly resourced risk management function.
- Promoting open risk culture
- Adopting international best practices in risk management

Keeping in view dynamics of internal and external environment, the group regularly reviews and updates policy manuals / frameworks and procedures in accordance with domestic regulatory environment and international standards.

The Group executes its risk strategy and undertakes controlled risk-taking activities within its risk management framework. The Board of Directors and its relevant committee, i.e. the Risk Management & Portfolio Review Committee (RM&PRC), the senior management and its relevant committees, i.e. the Management Credit and Risk Committee (MC&RC), Asset Liability Committee (ALCO), etc., are responsible to ensure formulation and implementation of comprehensive Risk Management Framework. This framework is based on prudent risk identification, measurement, management and monitoring processes which are closely aligned with the activities of the Group. The framework combines core policies, procedures and process designs with broad oversight and is supported by an efficient monitoring mechanism across the bank to ensure that risks are kept within an acceptable level.

The Group ensures that not only the relevant risks are identified but their implications are also considered and basis provided for managing and measuring the risks. Through Internal Control units, the Group ensures that effective controls are in place to mitigate each of the identified risk.

Independent from business groups, Head of Risk Management reports functionally to the Risk Management & Portfolio Review Committee (RM&PRC) and administratively to the President; the RM&PRC convenes regular meetings to evaluate bank's risk and portfolio concentrations. The Risk Management Group performs the following critical functions:

- Risk Management Policy Formulation
- Credit Risk Management
- Credit Review

# Notes To The Consolidated Financial Statements

For the year ended December 31, 2020

- Credit Risk Control
- Market Risk Management
- Liquidity Risk Management
- Operational Risk Management
- IT Risk Management

Keeping in view the international best practices and SBP requirements, Board of Directors of the Group has approved a Risk Appetite Statement, which takes into account quantitative and qualitative risk indicators, covering target ratios, credit, market, operational, liquidity and business risks.

## 45.1 Credit Risk

Credit risk arises from Groups's dealings with individuals, corporate borrowers, financial institutions, sovereigns etc. The Group is exposed to credit risk through its lending and investment activities. Credit risk makes up the largest part of the Group's exposure and it stems from Group's both on and off-balance sheet activities. Purpose of Credit Risk Management function is to identify, measure, manage, monitor and mitigate credit risk. To manage adverse outcomes in terms of unfavorable scenarios, multiple control factors in the lending structure of the Group provide additional comfort and support. Such controls range from quality of eligible collateral, pre-disbursement safety measures to post disbursement monitoring.

The Group has adopted Standardized Approach to measure Credit risk regulatory capital charge in compliance with Basel requirements. The approach mainly takes into account the assessment of external credit rating agencies. In line with SBP guidelines on Internal Credit Risk Rating Systems, the Group has developed rating systems and all its borrowers are internally rated. In order to further enhance the credit risk analysis and the processes, Probability Default based internal credit risk rating (ICRR) system based on the statistical modeling and validation in line with Basel principles. The revamped ICRR is currently focused on Corporate Commercial and Corporate Large customer categories. The Internal Credit Risk Rating Model for rating of SME Customers has also been revamped to achieve more accurate results and to improve the quality of credit decisions.

In order to manage groups's credit risk, following policies and procedures are in place:

- Individuals who take or manage risks clearly understand them in order to protect the Bank from avoidable risks;
- The approval of credit limits to counter parties are subject to pre-fact review;
- Extension in credit facility or material change to the credit facility is subject to credit review;
- Approval and review process is reviewed by RM&PRC and internal audit;
- Management periodically reviews the powers of credit approving and credit reviewing authorities.

Ongoing administration of the credit portfolio is an essential part of the credit process that supports and controls extension and maintenance of credit. The Group's Credit Risk Control is responsible for performing following activities:

- Credit disbursement authorization
- Collateral coverage and monitoring
- Compliance of loan covenants/ terms of approval
- Maintenance/ custody of collateral and security documentation
- Credit Risk Limit Controls

Credit Risk Monitoring is based on a comprehensive reporting framework. Continuous monitoring of the credit portfolio and the risks attached thereto are carried out at different levels including businesses, Audit & Risk Assets Review, Credit Risk Control, Credit Risk Management Division, etc.

To ensure a prudent distribution of asset portfolio, the Group manages its lending and investment activities within an appropriate limits framework. Per party exposure limit is maintained in accordance with SBP Prudential Regulations.

The Group creates specific provision against Non-Performing Loans (NPLs) in accordance with the Prudential Regulations and other directives issued by the State Bank of Pakistan (SBP) and charged to the profit and loss account. Provisions are held against identified as well as unidentified losses. Provisions against unidentified losses include general provision against consumer loans and Small enterprise (SEs) made in accordance with the requirements of the Prudential Regulations issued by

# Notes To The Consolidated Financial Statements

For the year ended December 31, 2020

SBP and provision based on historical loss experience on advances. General provisions pertaining to overseas advances are made in accordance with the requirements of the regulatory authorities of the respective countries. Please refer note No. 11.4 for reconciliation of changes in specific and general provisions.

The Risk Management function of the Group has further strengthened its credit review procedures in the light of COVID-19 and is regularly conducting assessments of the credit portfolio to identify borrowers most likely to be affected due to changes in the business and economic environment.

## Management of Non Performing Loans

The Group has a Special Assets Management (SAM) function, which is responsible for management of non performing loans. SAM undertakes restructuring / rescheduling of problem loans, as well as litigation of both civil and criminal cases for collection of debt.

## Stress Testing

Credit Risk stress testing is a regular exercise. Group's credit exposures including funded and non-funded facilities are subjected to stress tests. This exercise is conducted on a quarterly basis through assigning shocks to all assets of the Bank and assessing its resulting affect on capital adequacy inline with SBP requirements.

### 45.1.1 Lendings to financial institutions

#### Credit risk by public / private sector

|                    | Gross lendings   |           | Non - performing lending |      | Provision held |      |
|--------------------|------------------|-----------|--------------------------|------|----------------|------|
|                    | 2020             | 2019      | 2020                     | 2019 | 2020           | 2019 |
|                    | (Rupees in '000) |           |                          |      |                |      |
| Public/ Government | 16,804,051       | 3,580,870 | -                        | -    | -              | -    |
| Private            | 1,164,192        | 2,479,999 | -                        | -    | -              | -    |
|                    | 17,968,243       | 6,060,869 | -                        | -    | -              | -    |

### 45.1.2 Investment in debt securities

#### Credit risk by industry sector

|                                                     | Gross Investments |             | Non - performing Investments |         | Provision held |         |
|-----------------------------------------------------|-------------------|-------------|------------------------------|---------|----------------|---------|
|                                                     | 2020              | 2019        | 2020                         | 2019    | 2020           | 2019    |
|                                                     | (Rupees in '000)  |             |                              |         |                |         |
| Chemical and pharmaceuticals                        | 1,750,000         | 1,750,000   | -                            | -       | -              | -       |
| Electricity, gas, steam and air conditioning supply | 357,975           | 676,933     | -                            | -       | -              | -       |
| Financials including government securities          | 998,156,946       | 712,505,023 | 118                          | 118     | 118            | 118     |
| Manufacture of cement                               | 285,000           | 285,000     | 285,000                      | 285,000 | 285,000        | 285,000 |
| Manufacture of sugar                                | 145,656           | 145,656     | 145,656                      | 145,656 | 145,656        | 72,828  |
| Manufacture of textiles                             | 53,531            | 53,531      | 53,531                       | 53,531  | 53,531         | 53,531  |
| Telecommunications                                  | -                 | 114,747     | -                            | 114,747 | -              | 114,747 |
| Others                                              | 81,666            | 14,726,579  | 6,154                        | 7,682   | 6,154          | 7,682   |
|                                                     | 1,000,830,774     | 730,257,469 | 490,459                      | 606,734 | 490,459        | 533,906 |
| <b>Credit risk by public / private sector</b>       |                   |             |                              |         |                |         |
| Public/ Government                                  | 989,024,844       | 718,043,511 | -                            | -       | -              | -       |
| Private                                             | 11,805,930        | 12,213,958  | 490,459                      | 606,734 | 490,459        | 533,906 |
|                                                     | 1,000,830,774     | 730,257,469 | 490,459                      | 606,734 | 490,459        | 533,906 |

# Notes To The Consolidated Financial Statements

For the year ended December 31, 2020

## 45.1.3 Advances

### Credit risk by industry sector

|                                                             | Gross Advances     |                    | Non - performing Advances |                   | Provision held    |                   |
|-------------------------------------------------------------|--------------------|--------------------|---------------------------|-------------------|-------------------|-------------------|
|                                                             | 2020               | 2019               | 2020                      | 2019              | 2020              | 2019              |
|                                                             | (Rupees in '000)   |                    |                           |                   |                   |                   |
| Agriculture, forestry and fishing                           | 6,212,703          | 7,582,097          | 1,001,746                 | 652,580           | 437,355           | 362,867           |
| Construction                                                | 20,255,633         | 20,852,864         | 289,791                   | 289,435           | 278,464           | 287,840           |
| Electricity, gas, steam and air conditioning supply         | 40,921,064         | 44,370,647         | 376,717                   | 379,846           | 374,996           | 378,125           |
| Electronics and electrical appliances                       | 6,135,405          | 4,760,213          | 102,262                   | 113,496           | 101,825           | 107,776           |
| Financials                                                  | 17,004,242         | 21,334,593         | 462,665                   | 532,286           | 462,665           | 532,286           |
| Footwear and Leather garments                               | 3,972,108          | 4,566,500          | 170,131                   | 173,985           | 169,736           | 173,590           |
| Human health and social work activities                     | 922,333            | 2,760,760          | 45,596                    | 50,211            | 34,973            | 34,981            |
| Individuals                                                 | 49,897,371         | 44,438,103         | 4,371,180                 | 4,397,242         | 3,930,762         | 4,001,136         |
| Manufacture of basic metals and metal products              | 18,604,646         | 16,420,515         | 3,028,467                 | 3,104,026         | 3,018,387         | 2,892,814         |
| Manufacture of cement                                       | 12,103,828         | 12,095,610         | 392,862                   | 392,862           | 392,862           | 392,862           |
| Manufacture of chemicals and pharmaceutical products        | 44,424,431         | 48,727,242         | 275,980                   | 334,485           | 273,047           | 331,551           |
| Manufacture of coke and refined petroleum products          | 5,582,529          | 14,789,736         | 412,061                   | 399,317           | 411,445           | 398,701           |
| Manufacture of food & beverages products                    | 46,620,208         | 55,638,390         | 3,432,991                 | 3,014,962         | 3,058,910         | 2,786,691         |
| Manufacture of machinery, equipment and transport Equipment | 2,182,220          | 4,835,798          | 433,943                   | 435,301           | 396,551           | 434,527           |
| Manufacture of rubber and plastics products                 | 4,562,138          | 5,376,391          | 665,778                   | 661,498           | 662,506           | 658,226           |
| Manufacture of sugar                                        | 38,895,908         | 26,450,203         | 4,658,087                 | 4,497,643         | 4,655,219         | 3,434,211         |
| Manufacture of textiles                                     | 86,056,461         | 87,196,612         | 13,475,285                | 13,537,492        | 13,322,828        | 13,088,287        |
| Mining and quarrying                                        | 5,033,270          | 4,252,835          | 5,019                     | 7,286             | 5,019             | 7,286             |
| Manufacturing of Pulp, Paper, Paperboard                    | 3,851,182          | 5,021,705          | 179,539                   | 242,331           | 150,661           | 213,453           |
| Ship Breaking                                               | 6,707,314          | 8,366,211          | 4,348,014                 | 2,436,614         | 4,348,014         | 2,436,614         |
| Services                                                    | 15,202,429         | 13,688,812         | 480,993                   | 596,857           | 465,504           | 588,408           |
| Telecommunications                                          | 18,287,167         | 15,883,537         | 42,798                    | 42,798            | 42,798            | 42,798            |
| Transportation and storage                                  | 83,652,075         | 66,336,431         | 75,901                    | 93,955            | 66,253            | 84,307            |
| Wholesale and retail traders                                | 54,747,657         | 47,946,182         | 12,522,417                | 12,562,812        | 7,472,473         | 7,574,356         |
| Others                                                      | 6,531,453          | 8,179,645          | 695,295                   | 856,366           | 635,098           | 694,068           |
|                                                             | <b>598,365,775</b> | <b>591,871,632</b> | <b>51,945,518</b>         | <b>49,805,686</b> | <b>45,168,351</b> | <b>41,937,761</b> |
| <b>Credit risk by public / private sector</b>               |                    |                    |                           |                   |                   |                   |
| Public/ Government                                          | 105,422,741        | 95,096,713         | 639,825                   | 639,825           | 639,825           | 639,825           |
| Private                                                     | 492,943,034        | 496,774,919        | 51,305,693                | 49,165,861        | 44,528,526        | 41,297,936        |
|                                                             | <b>598,365,775</b> | <b>591,871,632</b> | <b>51,945,518</b>         | <b>49,805,686</b> | <b>45,168,351</b> | <b>41,937,761</b> |

# Notes To The Consolidated Financial Statements

For the year ended December 31, 2020

|                                                             | 2020               | 2019               |
|-------------------------------------------------------------|--------------------|--------------------|
|                                                             | (Rupees in '000)   |                    |
| <b>45.1.4 Contingencies and Commitments</b>                 |                    |                    |
| <b>Credit risk by industry sector</b>                       |                    |                    |
| Agriculture, forestry and fishing                           | 2,148,032          | 626,318            |
| Construction                                                | 22,705,666         | 28,790,117         |
| Electricity, gas, steam and air conditioning supply         | 25,280,013         | 16,318,961         |
| Electronics and electrical appliances                       | 6,827,749          | 4,574,959          |
| Financials                                                  | 399,373,812        | 578,498,188        |
| Footwear and Leather garments                               | 517,178            | 123,152            |
| Human health and social work activities                     | 1,612,922          | 409,816            |
| Individuals                                                 | 2,671,529          | 6,205,880          |
| Manufacture of basic metals and metal products              | 10,694,842         | 6,414,150          |
| Manufacture of cement                                       | 4,755,354          | 1,761,514          |
| Manufacture of chemicals and pharmaceutical products        | 26,547,957         | 19,976,862         |
| Manufacture of coke and refined petroleum products          | 8,329,298          | 15,369,784         |
| Manufacture of food & beverages products                    | 20,251,341         | 19,550,105         |
| Manufacture of machinery, equipment and transport Equipment | 8,946,430          | 6,790,046          |
| Manufacture of rubber and plastics products                 | 4,968,143          | 2,162,953          |
| Manufacture of sugar                                        | 4,623,950          | 3,790,969          |
| Manufacture of textiles                                     | 37,630,523         | 35,676,318         |
| Mining and quarrying                                        | 144,328            | 460,490            |
| Manufacturing of Pulp, Paper, Paperboard                    | 1,616,529          | 1,165,844          |
| Ship Breaking                                               | 556,614            | 2,535,412          |
| Services                                                    | 58,522,756         | 55,448,997         |
| Telecommunications                                          | 17,006,854         | 14,669,698         |
| Transportation and storage                                  | 10,648,735         | 4,076,724          |
| Wholesale and retail traders                                | 26,096,091         | 17,521,657         |
| Others                                                      | 37,898,657         | 22,537,128         |
|                                                             | <b>740,375,303</b> | <b>865,456,042</b> |
| <b>Credit risk by public / private sector</b>               |                    |                    |
| Public/ Government                                          | 229,256,802        | 321,606,927        |
| Private                                                     | 511,118,501        | 543,849,115        |
|                                                             | <b>740,375,303</b> | <b>865,456,042</b> |

## 45.1.5 Concentration of Advances

The Group top 10 exposures on the basis of total (funded and non-funded exposures) aggregated to Rs 235,823.529 million (2019: Rs. 236,769.236 million) are as following:

|                | 2020               | 2019               |
|----------------|--------------------|--------------------|
|                | (Rupees in '000)   |                    |
| Funded         | 75,373,723         | 80,717,454         |
| Non Funded     | 160,449,536        | 156,051,782        |
| Total Exposure | <b>235,823,259</b> | <b>236,769,236</b> |

The sanctioned limits against these top 10 exposures aggregated to Rs 311,201.617 million (2019: 291,923.228 million)

There is no provision against these top 10 exposures.

# Notes To The Consolidated Financial Statements

For the year ended December 31, 2020

## 45.1.6 Advances - Province/Region-wise Disbursement & Utilization

| Province / Region              | 2020                 |                    |                    |                   |                   |                                  |                |
|--------------------------------|----------------------|--------------------|--------------------|-------------------|-------------------|----------------------------------|----------------|
|                                | Disbursements        |                    |                    | Utilization       |                   |                                  |                |
|                                | Punjab               | Sindh              | KPK including FATA | Balochistan       | Islamabad         | AJK including Gilgit Balochistan |                |
|                                | (Rupees in '000)     |                    |                    |                   |                   |                                  |                |
| Punjab                         | 731,022,299          | 683,463,985        | 39,386,981         | 6,212,721         | 337,894           | 1,620,718                        | -              |
| Sindh                          | 555,378,201          | 12,974,461         | 495,054,217        | 6,776,970         | 40,570,866        | 1,687                            | -              |
| KPK including FATA             | 4,893,018            | 192,363            | -                  | 4,692,336         | -                 | 8,319                            | -              |
| Balochistan                    | 1,728,874            | -                  | 10,145             | -                 | 1,718,729         | -                                | -              |
| Islamabad                      | 32,173,536           | 2,558,963          | 2,246              | 2,293,047         | -                 | 27,319,280                       | -              |
| AJK including Gilgit-Baltistan | 340,864              | 68,573             | -                  | -                 | -                 | 27,915                           | 244,376        |
| <b>Total</b>                   | <b>1,325,536,792</b> | <b>699,258,345</b> | <b>534,453,589</b> | <b>19,975,074</b> | <b>42,627,489</b> | <b>28,977,919</b>                | <b>244,376</b> |

  

| Province / Region              | 2019                 |                    |                    |                   |                   |                                  |                |
|--------------------------------|----------------------|--------------------|--------------------|-------------------|-------------------|----------------------------------|----------------|
|                                | Disbursements        |                    |                    | Utilization       |                   |                                  |                |
|                                | Punjab               | Sindh              | KPK including FATA | Balochistan       | Islamabad         | AJK including Gilgit Balochistan |                |
|                                | (Rupees in '000)     |                    |                    |                   |                   |                                  |                |
| Punjab                         | 753,218,687          | 678,763,640        | 60,879,964         | 10,039,632        | 323,686           | 3,210,918                        | 847            |
| Sindh                          | 688,753,937          | 12,583,438         | 605,024,224        | 3,370,558         | 67,547,890        | 227,827                          | -              |
| KPK including FATA             | 5,481,487            | 73,656             | -                  | 5,407,831         | -                 | -                                | -              |
| Balochistan                    | 1,251,413            | -                  | 9,294              | -                 | 1,242,119         | -                                | -              |
| Islamabad                      | 43,495,899           | 5,008,912          | 228,682            | 1,789,813         | -                 | 36,393,156                       | 75,336         |
| AJK including Gilgit-Baltistan | 368,360              | 29,738             | -                  | -                 | -                 | -                                | 338,622        |
| <b>Total</b>                   | <b>1,492,569,783</b> | <b>696,459,384</b> | <b>666,142,164</b> | <b>20,607,834</b> | <b>69,113,695</b> | <b>39,831,901</b>                | <b>414,805</b> |

## 45.2 Market Risk

Market Risk arises from changes in market rates such as Interest Rates, Foreign Exchange Rates, Equity Prices, credit spreads and/or commodity prices as well as their correlations and volatilities resulting in a loss to earnings and capital. Group is exposed to market risk primarily through its trading activities, which are centered in the Treasury and Foreign Exchange Group and the Capital Market Division. Market risk also arises from market-making, facilitation of client business and proprietary positions in equities, fixed income and interest rate products and foreign exchange, which exposes bank to interest rate risk, foreign exchange risk and equity price risk.

The Group Market Risk Management structure consists of Risk Management & Portfolio Review Committee (RM&PRC) of the Board, Management Credit and Risk Committee, ALCO and independent Market Risk Management Division reporting directly to Group Head Risk Management. Market Risk function works in close partnership with the business segments to identify and monitor market risks throughout the Bank and to define market risk policies and procedures. Market Risk seeks to facilitate efficient risk/return management decisions, reduce volatility in operating performance and provide transparency into the Bank's market risk profile for senior management, the Board of Directors and regulators. Market risk authority, including both approval of market risk limits and approval of market risks is vested in the ALCO.

In line with regulatory requirements, Group has clearly defined, in its Global Risk Management policy, the positions which shall be subject to market risk. The definition covers the accounting classifications as well as positions booked by different business groups under "Available for Sale" category. The assets subject to trading book treatment are frequently, mostly on daily basis, valued and actively managed. The positions which does not fulfill the criteria of Trading book falls under the Banking Book and are treated as per SBP requirements.

# Notes To The Consolidated Financial Statements

For the year ended December 31, 2020

The Group measures and manages Market Risk by using different risk parameters with combinations of various limits. Board approved Global Risk Management Policy provides guidelines for assuming controlled market risk, its monitoring and management. The approved limits are compared with the numbers generated by the market risk management systems based on the trading activity and the outstanding positions.

Besides conventional methods, the Group also uses VaR (Value at Risk) technique for market risk assessment of positions assumed by its treasury and capital market groups. In-house based solutions are used for calculating mark to market value of positions and generating VaR (value at risk) and sensitivity numbers. Thresholds for different positions are established to compare the expected losses at a given confidence level and over a specified time horizon.

A framework of stress testing, scenario analysis and reverse stress tests covering both banking and trading books as per SBP guidelines is also in place. The results of the stress tests are reviewed by senior management and also reported to the SBP.

The Group is also exposed to interest rate risk both in trading and banking books. Risk parameters along with the marked to market values of government securities held by the Bank's treasury are generated on daily basis. The risk parameters include duration, PVBP, and VaR on individual security basis as well as on portfolio basis. These reports are presented to the senior management for review on a daily basis.

## 45.2.1 Balance sheet split by trading and banking books

|                                       | 2020             |               |               | 2019         |              |               |
|---------------------------------------|------------------|---------------|---------------|--------------|--------------|---------------|
|                                       | Banking book     | Trading book  | Total         | Banking book | Trading book | Total         |
|                                       | (Rupees in '000) |               |               |              |              |               |
| Cash and balances with treasury banks | 132,053,041      | -             | 132,053,041   | 142,957,358  | -            | 142,957,358   |
| Balances with other banks             | 29,011,521       | -             | 29,011,521    | 21,371,753   | -            | 21,371,753    |
| Lendings to financial institutions    | 17,968,243       | -             | 17,968,243    | 6,060,869    | -            | 6,060,869     |
| Investments                           | 24,028,377       | 1,012,189,158 | 1,036,217,535 | 41,407,690   | 716,033,900  | 757,441,590   |
| Advances                              | 547,685,708      | -             | 547,685,708   | 548,472,860  | -            | 548,472,860   |
| Fixed assets                          | 63,679,312       | -             | 63,679,312    | 64,201,807   | -            | 64,201,807    |
| Intangible assets                     | 1,867,244        | -             | 1,867,244     | 1,978,975    | -            | 1,978,975     |
| Other assets                          | 62,793,791       | -             | 62,793,791    | 69,729,659   | -            | 69,729,659    |
|                                       | 879,087,237      | 1,012,189,158 | 1,891,276,395 | 896,180,971  | 716,033,900  | 1,612,214,871 |

## 45.2.2 Foreign Exchange Risk

Foreign exchange risk exposes the Group to changes in the values of current holdings and future cash flows denominated in currencies other than home currency due to the exchange rate fluctuation and volatility. The types of instruments exposed to this risk include investments in foreign branches, foreign currency-denominated loans, foreign currency-denominated deposits, future cash flows in foreign currencies arising from foreign exchange transactions, etc.

The core objective of foreign exchange risk management is to ensure the foreign exchange exposure of the Group remain within defined risk appetite and insulate group against undue losses that may arise due to volatile movements in foreign exchange rates or interest rates.

Limit structure to manage Foreign exchange risk including gap limits on different tenors in major currencies are in place to control risk. Groips's net open position and foreign exchange exposure limit (FEEL) is monitored and reported on intra-day and day end basis. Foreign exchange risk parameters including VaR is generated and monitored on daily basis. Stress testing of foreign exchange portfolio and its reporting to senior management and RM&PRC of the Board is a regular feature.



# Notes To The Consolidated Financial Statements

For the year ended December 31, 2020

|                              | 2020                    |                              |                         |                               | 2019                    |                              |                         |                               |
|------------------------------|-------------------------|------------------------------|-------------------------|-------------------------------|-------------------------|------------------------------|-------------------------|-------------------------------|
|                              | Foreign currency Assets | Foreign currency liabilities | Off-balance sheet items | Net foreign currency exposure | Foreign currency Assets | Foreign currency liabilities | Off-balance sheet items | Net foreign currency exposure |
|                              | (Rupees in '000)        |                              |                         |                               |                         |                              |                         |                               |
| United States Dollar         | 49,879,275              | 58,098,426                   | 8,304,216               | 85,065                        | 42,949,125              | 61,958,946                   | 20,204,447              | 1,194,626                     |
| Sri Lankan Rupees            | 144,228                 | -                            | -                       | 144,228                       | -                       | 164,290                      | 148,959                 | (15,331)                      |
| Arab Emirates Dirham         | -                       | 248,645                      | 39,598                  | (209,047)                     | 194,163                 | 949,404                      | 590,192                 | (165,049)                     |
| Euro                         | 2,846,513               | 7,017,270                    | 4,194,638               | 23,881                        | 438,134                 | 4,960,868                    | 4,564,076               | 41,342                        |
| Great Britain Pound Sterling | 2,780,633               | 6,826,427                    | 4,016,794               | (29,000)                      | 703,957                 | 5,585,201                    | 4,822,148               | (59,096)                      |
| Japanese Yen                 | 34,647                  | 160                          | 22,007                  | 56,494                        | 19,750                  | 4,627                        | 17,723                  | 32,846                        |
| Other currencies             | 384,723                 | -                            | 47,086                  | 431,809                       | 133,740                 | -                            | 31,769                  | 165,509                       |
|                              | 56,070,019              | 72,190,928                   | 16,624,339              | 503,430                       | 44,438,869              | 73,623,336                   | 30,379,314              | 1,194,847                     |

|                                                                            | 2020             |              | 2019         |              |
|----------------------------------------------------------------------------|------------------|--------------|--------------|--------------|
|                                                                            | Banking book     | Trading book | Banking book | Trading book |
|                                                                            | (Rupees in '000) |              |              |              |
| Impact of 1% change in foreign exchange rates on - Profit and loss account | -                | 5,034        | -            | 11,948       |

#### 45.2.3 Equity position Risk

Group's proprietary positions in the equity instruments exposes it to the equity price risk in its trading and banking books. Equity price risk is managed by applying trading limit, scrip-wise and portfolio wise nominal limits. VaR analysis and stress testing of the equity portfolio are also performed and reported to senior management on a daily basis. The stress test for equity price risk assesses the impact of the fall in the stock market index using certain assumptions. In addition to this stress testing, historical scenario analysis on equities is also performed periodically as advised by the State Bank of Pakistan through Guideline on Stress Testing.

|                                                                   | 2020             |        | 2019    |        |
|-------------------------------------------------------------------|------------------|--------|---------|--------|
|                                                                   | AFS              | HFT    | AFS     | HFT    |
|                                                                   | (Rupees in '000) |        |         |        |
| Impact of 5% change in equity prices on - Profit and loss account | -                | 63,472 | -       | 57,548 |
| - Other comprehensive income                                      | 962,069          | -      | 796,211 | -      |

#### 45.2.4 Yield / Interest Rate Risk in the Banking Book (IRRBB)-Basel II Specific

Yield/ Interest rate sensitivity position for on-balance sheet instruments is based on the earlier of contractual re-pricing or maturity date and for off-balance sheet instruments is based on settlement date.

The increase / (decrease) in earnings due to change in the interest rate is as follows:

|                                                                    | 2020             |              | 2019         |              |
|--------------------------------------------------------------------|------------------|--------------|--------------|--------------|
|                                                                    | Banking book     | Trading book | Banking book | Trading book |
|                                                                    | (Rupees in '000) |              |              |              |
| Impact of 1% change in interest rates on - Profit and loss account | (3,870,506)      | 5,305,338    | 2,470,389    | 24,844       |
| - Other comprehensive income                                       | -                | (7,497,582)  | -            | 6,819,634    |

The Group has classified Available for Sale investments as Trading in Basel-II.

# Notes To The Consolidated Financial Statements

For the year ended December 31, 2020

## 45.2.5 Mismatch of Interest Rate Sensitive Assets and Liabilities

|                                                       | Effective yield/ interest rate | Total         | Exposed to Yield/ Interest risk<br>(Rupees in '000) |                    |                    |                         |                   |                   |                   |                    | Non-interest bearing financial instruments |                |             |
|-------------------------------------------------------|--------------------------------|---------------|-----------------------------------------------------|--------------------|--------------------|-------------------------|-------------------|-------------------|-------------------|--------------------|--------------------------------------------|----------------|-------------|
|                                                       |                                |               | Upto 1 month                                        | Over 1 to 3 months | Over 3 to 6 months | Over 6 months to 1 year | Over 1 to 2 years | Over 2 to 3 years | Over 3 to 5 years | Over 5 to 10 years |                                            | Above 10 years |             |
| <b>On-balance sheet financial instruments</b>         |                                |               |                                                     |                    |                    |                         |                   |                   |                   |                    |                                            |                |             |
| <b>Assets</b>                                         |                                |               |                                                     |                    |                    |                         |                   |                   |                   |                    |                                            |                |             |
| Cash and balances with treasury banks                 | -                              | 132,053,041   | 6,810,666                                           | -                  | -                  | -                       | -                 | -                 | -                 | -                  | -                                          | -              | 125,242,385 |
| Balances with other banks                             | 0.21%                          | 29,011,521    | 2,557,720                                           | -                  | -                  | -                       | -                 | -                 | -                 | -                  | -                                          | -              | 25,654,629  |
| Lending to financial institutions                     | 7.27%                          | 17,968,243    | 17,968,243                                          | -                  | -                  | -                       | -                 | -                 | -                 | -                  | -                                          | -              | -           |
| Investments                                           | 10.77%                         | 1,096,217,535 | 183,723,956                                         | 426,084,702        | 170,130,910        | 62,818,947              | 24,457,188        | 41,949,392        | 30,794,310        | 71,118,966         | -                                          | 25,139,174     | -           |
| Advances                                              | 9.34%                          | 530,862,738   | 432,736,935                                         | 55,725,610         | 5,822,045          | 12,758,741              | 3,619,904         | 1,742,088         | 4,803,725         | 1,859,527          | 6,139,018                                  | 5,595,145      | -           |
| Other assets                                          |                                | 52,518,097    | -                                                   | -                  | -                  | -                       | -                 | -                 | -                 | -                  | -                                          | -              | 52,518,097  |
|                                                       |                                | 1,798,631,175 | 643,857,510                                         | 482,609,484        | 175,952,955        | 75,577,688              | 28,077,092        | 43,691,480        | 35,598,035        | 72,978,483         | 6,139,018                                  | 234,149,430    | -           |
| <b>Liabilities</b>                                    |                                |               |                                                     |                    |                    |                         |                   |                   |                   |                    |                                            |                |             |
| Bills payable                                         |                                | 26,451,513    | -                                                   | -                  | -                  | -                       | -                 | -                 | -                 | -                  | -                                          | -              | 26,451,513  |
| Borrowings                                            | 5.30%                          | 184,577,340   | 126,736,400                                         | 19,225,222         | 5,798,255          | 1,999,960               | 8,816,080         | 3,763,698         | 4,631,690         | 13,506,035         | -                                          | -              | -           |
| Deposits and other accounts                           | 4.50%                          | 1,388,737,961 | 796,398,749                                         | 21,243,238         | 13,630,588         | 30,543,903              | 1,998,833         | 115,810           | 1,689,628         | 212,000            | -                                          | 522,905,212    | -           |
| Other liabilities                                     |                                | 68,943,336    | -                                                   | -                  | -                  | -                       | -                 | -                 | -                 | -                  | -                                          | -              | 68,943,336  |
|                                                       |                                | 1,668,610,150 | 923,135,149                                         | 40,468,460         | 19,428,843         | 32,443,863              | 10,814,913        | 3,879,508         | 6,521,318         | 13,718,035         | -                                          | 618,200,061    | -           |
| <b>On-balance sheet gap</b>                           |                                | 130,021,025   | (279,277,639)                                       | 442,141,024        | 156,524,112        | 43,133,825              | 17,262,179        | 39,811,972        | 29,076,717        | 59,260,448         | 6,139,018                                  | (384,050,631)  | -           |
| <b>Off-balance sheet financial instruments</b>        |                                |               |                                                     |                    |                    |                         |                   |                   |                   |                    |                                            |                |             |
| FX options purchase                                   |                                | 182,800       | 122,370                                             | 60,430             | -                  | -                       | -                 | -                 | -                 | -                  | -                                          | -              | -           |
| Forward purchase of Government securities             |                                | 11,089,775    | 11,089,775                                          | -                  | -                  | -                       | -                 | -                 | -                 | -                  | -                                          | -              | -           |
| Cross Currency Swaps purchase                         |                                | 1,975,311     | 339,938                                             | -                  | 210,505            | 87,318                  | 547,272           | -                 | 790,278           | -                  | -                                          | -              | -           |
| Foreign exchange contracts purchase                   |                                | 172,137,589   | 69,994,741                                          | 67,331,082         | 26,239,931         | 8,571,835               | -                 | -                 | -                 | -                  | -                                          | -              | -           |
|                                                       |                                | 185,385,475   | 81,546,824                                          | 67,391,512         | 26,450,436         | 8,659,163               | 547,272           | -                 | 790,278           | -                  | -                                          | -              | -           |
| FX options sale                                       |                                | 182,800       | 122,370                                             | 60,430             | -                  | -                       | -                 | -                 | -                 | -                  | -                                          | -              | -           |
| Cross Currency Swaps sale                             |                                | 2,130,472     | 340,109                                             | -                  | 210,505            | 242,308                 | 547,272           | -                 | 790,278           | -                  | -                                          | -              | -           |
| Foreign exchange contracts sale                       |                                | 155,508,663   | 58,735,248                                          | 59,516,527         | 23,227,903         | 14,028,975              | -                 | -                 | -                 | -                  | -                                          | -              | -           |
|                                                       |                                | 157,821,925   | 59,197,727                                          | 59,576,957         | 23,438,408         | 14,271,283              | 547,272           | -                 | 790,278           | -                  | -                                          | -              | -           |
| <b>Off-balance sheet gap</b>                          |                                | 27,563,550    | 22,349,097                                          | 7,814,555          | 3,012,028          | (5,612,130)             | -                 | -                 | -                 | -                  | -                                          | -              | -           |
| <b>Total Yield/Interest Risk Sensitivity Gap</b>      |                                | (253,928,542) | 449,955,579                                         | 159,556,140        | 37,521,695         | 17,262,179              | 39,811,972        | 29,076,717        | 59,260,448        | 6,139,018          |                                            |                |             |
| <b>Cumulative Yield/Interest Risk Sensitivity Gap</b> |                                | (256,928,542) | 193,027,037                                         | 352,563,177        | 390,084,872        | 407,347,051             | 447,159,023       | 476,235,740       | 535,496,188       | 541,635,206        |                                            |                |             |

# Notes To The Consolidated Financial Statements

For the year ended December 31, 2020

2019

|                                                       | Effective yield/ interest rate | Total         | Exposed to Yield/ Interest risk |                    |                    |                         |                   |                   |                   |                    |             | Non-interest bearing financial instruments |             |
|-------------------------------------------------------|--------------------------------|---------------|---------------------------------|--------------------|--------------------|-------------------------|-------------------|-------------------|-------------------|--------------------|-------------|--------------------------------------------|-------------|
|                                                       |                                |               | Upto 1 month                    | Over 1 to 3 months | Over 3 to 6 months | Over 6 months to 1 year | Over 1 to 2 years | Over 2 to 3 years | Over 3 to 5 years | Over 5 to 10 years | Above years |                                            |             |
| (Rupees in '000)                                      |                                |               |                                 |                    |                    |                         |                   |                   |                   |                    |             |                                            |             |
| <b>On-balance sheet financial instruments</b>         |                                |               |                                 |                    |                    |                         |                   |                   |                   |                    |             |                                            |             |
| <b>Assets</b>                                         |                                |               |                                 |                    |                    |                         |                   |                   |                   |                    |             |                                            |             |
| Cash and balances with treasury banks                 | 0.70%                          | 142,357,358   | 10,517,551                      | -                  | -                  | -                       | -                 | -                 | -                 | -                  | -           | -                                          | 132,439,807 |
| Balances with other banks                             | 0.55%                          | 21,371,753    | 7,176,640                       | 1,340,374          | -                  | -                       | -                 | -                 | -                 | -                  | -           | -                                          | 12,854,739  |
| Lending to financial institutions                     | 10.91%                         | 6,060,869     | 2,689,205                       | 3,371,664          | -                  | -                       | -                 | -                 | -                 | -                  | -           | -                                          | -           |
| Investments                                           | 11.47%                         | 757,441,590   | 180,997,048                     | 58,772,960         | 43,600,582         | 187,051,328             | 105,606,890       | 14,900,121        | 60,307,907        | 83,531,045         | -           | 22,673,709                                 | -           |
| Advances                                              | 11.70%                         | 537,493,107   | 484,867,924                     | 29,157,490         | 6,805,578          | 3,157,363               | 1,816,256         | 3,009,684         | 1,481,043         | 1,759,402          | 5,444,367   | -                                          | 58,219,618  |
| Other assets                                          |                                | 58,219,618    | -                               | -                  | -                  | -                       | -                 | -                 | -                 | -                  | -           | -                                          | -           |
|                                                       |                                | 1,523,550,295 | 686,248,388                     | 92,642,488         | 50,406,160         | 190,208,691             | 107,423,146       | 17,909,805        | 61,788,950        | 85,290,447         | 5,444,367   | 226,187,873                                | -           |
| <b>Liabilities</b>                                    |                                |               |                                 |                    |                    |                         |                   |                   |                   |                    |             |                                            |             |
| Bills payable                                         |                                | 12,795,325    | -                               | -                  | -                  | -                       | -                 | -                 | -                 | -                  | -           | -                                          | 12,795,325  |
| Borrowings                                            | 7.84%                          | 92,859,988    | 55,458,366                      | 11,294,285         | 8,605,720          | 1,507,529               | 2,097,344         | 2,217,667         | 3,572,934         | 8,106,113          | -           | -                                          | -           |
| Deposits and other accounts                           | 5.96%                          | 1,226,593,025 | 886,055,880                     | 35,105,817         | 22,527,727         | 24,408,630              | 3,459,232         | 2,002,175         | 1,270,783         | -                  | -           | -                                          | 451,762,781 |
| Other liabilities                                     |                                | 85,297,242    | -                               | -                  | -                  | -                       | -                 | -                 | -                 | -                  | -           | -                                          | 85,297,242  |
|                                                       |                                | 1,417,545,580 | 741,514,266                     | 46,400,102         | 31,133,447         | 25,916,169              | 5,556,576         | 4,219,832         | 4,843,717         | 8,106,113          | -           | -                                          | 549,855,348 |
| <b>On-balance sheet gap</b>                           |                                | 106,004,735   | (65,265,898)                    | 46,242,386         | 19,272,713         | 164,292,532             | 101,866,570       | 13,689,973        | 56,945,233        | 77,184,334         | 5,444,367   | (323,667,475)                              | -           |
| <b>Off-balance sheet financial instruments</b>        |                                |               |                                 |                    |                    |                         |                   |                   |                   |                    |             |                                            |             |
| FX options purchase                                   |                                | 431,449       | 204,798                         | 226,651            | -                  | -                       | -                 | -                 | -                 | -                  | -           | -                                          | -           |
| Outright purchase of Government Securities            |                                | 82,284,304    | 82,284,304                      | -                  | -                  | -                       | -                 | -                 | -                 | -                  | -           | -                                          | -           |
| Cross currency swaps - purchase                       |                                | 4,428,663     | -                               | 311,405            | -                  | 765,490                 | 1,522,069         | 867,049           | 972,650           | -                  | -           | -                                          | -           |
| Interest Rate Swaps - purchase                        |                                | 316,500       | -                               | -                  | -                  | 316,500                 | -                 | -                 | -                 | -                  | -           | -                                          | -           |
| Foreign exchange contracts purchase                   |                                | 216,647,656   | 81,562,475                      | 85,102,271         | 45,299,680         | 4,683,230               | -                 | -                 | -                 | -                  | -           | -                                          | -           |
|                                                       |                                | 304,108,572   | 164,051,577                     | 85,640,327         | 45,299,680         | 5,765,220               | 1,522,069         | 867,049           | 972,650           | -                  | -           | -                                          | -           |
| FX options sale                                       |                                | 431,449       | 204,798                         | 226,651            | -                  | -                       | -                 | -                 | -                 | -                  | -           | -                                          | -           |
| Forward sale of Government securities                 |                                | 5,412,334     | 5,412,334                       | -                  | -                  | -                       | -                 | -                 | -                 | -                  | -           | -                                          | -           |
| Cross Currency Swaps - sale                           |                                | 4,636,745     | -                               | 311,405            | 52,745             | 765,490                 | 1,677,406         | 867,049           | 972,650           | -                  | -           | -                                          | -           |
| Foreign exchange contracts sale                       |                                | 188,243,433   | 69,140,866                      | 67,523,912         | 50,136,199         | 1,442,456               | -                 | -                 | -                 | -                  | -           | -                                          | -           |
|                                                       |                                | 198,723,961   | 74,757,998                      | 68,061,968         | 50,189,944         | 2,207,946               | 1,677,406         | 867,049           | 972,650           | -                  | -           | -                                          | -           |
| <b>Off-balance sheet gap</b>                          |                                | 105,384,611   | 89,293,579                      | 17,578,359         | (4,889,264)        | 3,557,274               | (155,337)         | -                 | -                 | -                  | -           | -                                          | -           |
| <b>Total Yield/Interest Risk Sensitivity Gap</b>      |                                | 34,027,661    | 63,820,745                      | 14,383,449         | 167,949,806        | 101,711,233             | 13,689,973        | 56,945,233        | 77,184,334        | 5,444,367          | -           | -                                          | -           |
| <b>Cumulative Yield/Interest Risk Sensitivity Gap</b> |                                | 34,027,661    | 97,848,426                      | 112,231,875        | 280,081,681        | 381,792,914             | 395,482,887       | 452,428,120       | 529,612,454       | 535,056,821        | -           | -                                          | -           |

# Notes To The Consolidated Financial Statements

For the year ended December 31, 2020

|                                       | 2020<br>(Rupees in '000) | 2019<br>(Rupees in '000) |
|---------------------------------------|--------------------------|--------------------------|
| <b>Reconciliation to total assets</b> |                          |                          |
| <b>Balance as per balance sheet</b>   | 1,891,276,395            | 1,612,214,871            |
| Less: Non financial assets            |                          |                          |
| Islamic financing and related assets  | 16,822,970               | 10,973,753               |
| Fixed assets                          | 63,679,312               | 64,201,807               |
| Intangible assets                     | 1,867,244                | 1,978,975                |
| Other assets                          | 10,275,694               | 11,510,041               |
| <b>Total financial assets</b>         | <b>92,645,220</b>        | <b>88,664,576</b>        |
|                                       | <b>1,798,631,175</b>     | <b>1,523,550,295</b>     |
| <b>Reconciliation to total assets</b> |                          |                          |
| <b>Balance as per balance sheet</b>   | 1,698,285,012            | 1,440,868,054            |
| Less: Non financial liabilities       |                          |                          |
| Other liabilities                     | 22,183,822               | 17,108,271               |
| Deferred tax liability                | 7,491,040                | 6,214,223                |
| <b>Total financial liabilities</b>    | <b>29,674,862</b>        | <b>23,322,494</b>        |
|                                       | <b>1,668,610,150</b>     | <b>1,417,545,560</b>     |

Yield risk is the risk of decline in earnings due to adverse movement of the yield curve.

Interest rate risk is the risk that the value of the financial instrument will fluctuate due to changes in the market interest rates.

## 45.3

### Operational Risk

Operational risk is the risk of loss resulting from inadequate or failed internal processes, people, and systems or from external events. This definition includes legal risks but excludes strategic and reputational risks.

The Group operational risk management framework, as laid down in the Global Risk Management Policy, duly approved by BOD, is flexible enough to implement in stages and permits the overall risk management approach to evolve in the light of organizational learning and the future needs of the Group. Operational loss events are reviewed and appropriate corrective actions taken on an ongoing basis, including measures to improve control procedures with respect to design and operative effectiveness.

Operational Risk Management helps the Group understand risks and improve mitigating controls so as to minimize operational risks that are inherent in almost all areas of the Group. Going forward, the Group will further strengthen its risk function, policies and procedures to facilitate its operations and improve quality of assets to safeguard interest of depositors.

#### 45.3.1

### Operational Risk-Disclosures Basel II Specific

Currently, the Group is reporting operational risk capital charge under Basic Indicator Approach (BIA). The Group took a number of initiative with respect to operational risk management like using Key Risk Indicators (Kris), Loss events database and Risk & Control Self Assessments (ROSA) to manage its operational risk effectively

In accordance with the Operational Risk Management (OR) regulations, policy and framework, a database covering operational risk events is being maintained using a state of the art software solution, which has enhanced features and a better workflow management. This new software has further augmented Group's capacity to capture and report operational risk events and Kris. The software is also capable of generating periodical regulatory and management reports. Periodical updates on Operational Risk events are presented to senior management and the Risk Management and Portfolio Review Committee of the Board.

# Notes To The Consolidated Financial Statements

For the year ended December 31, 2020

## 45.4 Liquidity Risk

Liquidity represents the ability to fund assets and meet obligations as they become due. The Group understands that liquidity does not come for free, and surplus liquidity has an opportunity cost which needs to be recognized. Liquidity risk is a risk of not being able to obtain funds at a reasonable price within a reasonable time period to meet obligations as they become due. Liquidity is essential to the ability to operate financial services businesses and, therefore, the ability to maintain surplus levels of liquidity through economic cycles is crucial. Particularly during periods of adverse conditions, liquidity management is among the most important activities that the MCB conducts during both normal and stress periods. MCB recognizes that liquidity risk can arise from the Group activities and can be grouped into three categories:

- Inflows/Outflows from on-balance sheet items (other than marketable securities and wholesale borrowings) and off-balance sheet items;
- Marketability of trading securities; and
- Capacity to borrow from the wholesale markets for funding as well as trading activities.

### Liquidity Management

The Asset Liability Management Committee of the group has the responsibility for the formulation of overall strategy and oversight of the Asset Liability Management function. Board has approved a comprehensive Liquidity Risk Policy (part of Risk Management Policy), which stipulates policies regarding maintenance of various ratios, funding preferences, and evaluation of group's liquidity under normal and stress scenarios. A framework to assess the maturity profile of non-contractual assets and liabilities is in place to supplement the liquidity management. Group comprehensive liquidity management framework assists it to closely watch the liquidity position through monitoring of early warning indicators and stress testing, to ensure effective and timely decision making.

Group liquidity risk management framework is designed to identify measure and manage in a timely manner the liquidity risk position of the Group. The underlying policies and procedures include: Global Risk Management policy, Global Treasury Policy, Investment policy, Contingency Funding Plan, Liquidity Strategy and Limit Structure which are reviewed and approved regularly by the senior management /Board members. Moreover; the Group also prepares a 'Contingency Funding Plan' (CFP) to address liquidity issues in time of stress/crises situation containing early warning indicators to pre-empt unforeseen liquidity crises. Group conducts Liquidity Risk Analysis on regular basis as well as Maturity of gaps are also reviewed in order to ensure diversification in terms of tenors. Group liquidity risk framework envisages to project the Group funding position during temporary and long-term liquidity changes, including those caused by liability erosion and explicitly identifying quantifying and ranking all sources of funding preferences, such as reducing assets, modifying or increasing liability structure; and using other alternatives for controlling statement of financial position changes. Group performs regular liquidity stress tests as part of its liquidity monitoring activities. The purpose of the liquidity stress tests is intended to ensure sufficient liquidity for the group under both idiosyncratic and systemic market stress conditions. Group liquidity risk management approach involves intraday liquidity management, managing funding sources and evaluation of structural imbalances in balance sheet structure.

In view of the relaxation granted by SBP for deferral of principal and markup and for rescheduling / restructuring of loans there will be an impact on the maturity profile of the Group. The Asset and Liability Committee (ALCO) of the Group is monitoring the liquidity position and the Group is confident that the liquidity buffer currently maintained is sufficient to cater to any adverse movement in the cash flow maturity profile

### Intraday Liquidity Management

Intraday liquidity management is about managing the daily payments and cash flows. Group has policies to ensure that sufficient cash is maintained during the day to make payments through local payment system. The policy of the Group is to maintain adequate liquidity at all times, in all geographical locations and for all currencies and hence to be in a position, in the normal course of business, to meet obligations, repay depositors and fulfill commitments.

### Managing Funding Sources

Managing funding sources, as per policy Group maintain a portfolio of marketable securities that can either be sold outright or sold through a repurchase agreement to generate cash flows for meeting unexpected liquidity requirement. As a part of liquidity management Group maintains borrowing relationships to ensure the continued access to diverse market of funding sources. Group's sound credit rating together with excellent market reputation has enabled Group to secure ample call lines with local and foreign groups. The level of liquidity reserves as per regulatory requirements also mitigates risks. Group's investment in marketable securities is much higher than the Statutory Liquidity requirements.

# Notes To The Consolidated Financial Statements

For the year ended December 31, 2020

## 45.4.1 Maturities of Assets and Liabilities - based on contractual maturity of the assets and liabilities of the Group

2020

|                                       | Upto 1 day    | Over 1 to 7 days | Over 7 to 14 days | Over 14 days to 1 months | Over 1 or 2 months | Over 2 to 3 months | Over 3 to 6 months | Over 6 to 9 months | Over 9 months to 1 years | Over 1 to 2 years | Over 2 to 3 years | Over 3 to 5 years | Over 5 years |
|---------------------------------------|---------------|------------------|-------------------|--------------------------|--------------------|--------------------|--------------------|--------------------|--------------------------|-------------------|-------------------|-------------------|--------------|
| (Rupees in '000)                      |               |                  |                   |                          |                    |                    |                    |                    |                          |                   |                   |                   |              |
| <b>Assets</b>                         |               |                  |                   |                          |                    |                    |                    |                    |                          |                   |                   |                   |              |
| Cash and balances with treasury banks | 132,053,041   | -                | -                 | -                        | -                  | -                  | -                  | -                  | -                        | -                 | -                 | -                 | -            |
| Balances with other banks             | 23,026,781    | 1,888,376        | 1,249,151         | 2,048,182                | -                  | 799,031            | -                  | -                  | -                        | -                 | -                 | -                 | -            |
| Lending to financial institutions     | 17,968,243    | 15,275,261       | -                 | -                        | -                  | -                  | -                  | -                  | -                        | -                 | -                 | -                 | -            |
| Investments                           | 1,036,217,535 | 2,115,960        | 7,44,830          | 72,413,931               | 159,537,887        | 179,728,312        | 114,920,205        | 60,920,079         | 6,328,360                | 29,707,053        | 75,507,721        | 46,183,005        | 198,253,687  |
| Advances                              | 547,685,708   | 71,415,264       | 18,829,281        | 23,201,609               | 30,523,564         | 34,544,271         | 59,677,666         | 39,860,088         | 38,419,706               | 58,572,922        | 48,295,903        | 89,731,805        | 47,437,061   |
| Fixed assets                          | 63,679,312    | 9,138            | 54,832            | 273,734                  | 501,067            | 398,581            | 1,195,045          | 1,193,172          | 1,188,330                | 4,288,513         | 4,258,016         | 5,135,853         | 45,119,060   |
| Intangible assets                     | 1,867,244     | 1,979            | 11,878            | 44,088                   | 87,266             | 72,153             | 216,545            | 216,582            | 216,530                  | 464,642           | 45,265            | 159,143           | 317,316      |
| Deferred tax assets                   | 3,925,760     | 7,623            | 45,740            | 129,597                  | 222,416            | 236,324            | 693,727            | 705,676            | 693,727                  | 631,898           | 505,668           | -                 | -            |
| Other assets                          | 62,788,791    | 519,422          | 2,287,085         | 6,658,755                | 10,076,645         | 10,844,951         | 2,393,673          | 913,569            | 400,930                  | 2,280,624         | 7,954,884         | 11,115,603        | -            |
|                                       | 1,895,202,155 | 39,137,283       | 108,280,086       | 104,769,896              | 200,948,845        | 226,123,623        | 179,096,861        | 103,909,146        | 47,247,583               | 95,925,652        | 136,668,457       | 132,325,409       | 289,127,124  |
| <b>Liabilities</b>                    |               |                  |                   |                          |                    |                    |                    |                    |                          |                   |                   |                   |              |
| Bills payable                         | 26,451,513    | 881,718          | 6,172,020         | 14,107,474               | -                  | -                  | -                  | -                  | -                        | -                 | -                 | -                 | -            |
| Borrowings                            | 184,577,340   | 27,117,387       | 1,537,110         | 5,046,669                | 15,158,024         | 4,067,188          | 5,798,255          | 1,010,722          | 889,239                  | 8,816,080         | 3,763,698         | 4,831,690         | 13,506,035   |
| Deposits and other accounts           | 1,388,737,961 | 1,277,556,493    | 6,676,164         | 20,097,720               | 15,871,497         | 11,274,222         | 15,154,216         | 17,758,355         | 14,026,638               | 2,193,993         | 158,796           | 1,698,528         | 212,000      |
| Deferred tax liabilities              | 11,416,800    | 33,252           | 35,714            | 10,894                   | 202,719            | 28,870             | 98,971             | 739,824            | 212,623                  | 688,992           | 1,954,940         | 2,506,244         | 4,863,080    |
| Other liabilities                     | 91,027,158    | 12,566,376       | 4,123,090         | 5,965,945                | 5,729,410          | 6,105,290          | 13,558,440         | 2,237,294          | 2,173,027                | 4,232,223         | 9,889,368         | 16,491,972        | 5,210,080    |
|                                       | 1,702,210,772 | 1,318,155,226    | 18,542,961        | 46,228,802               | 36,961,650         | 21,475,590         | 34,609,882         | 21,746,195         | 17,300,527               | 15,941,288        | 15,766,802        | 25,528,434        | 23,791,195   |
| <b>Net assets</b>                     | 192,991,383   | (1,086,313,036)  | 89,737,125        | 59,541,084               | 163,987,195        | 204,646,043        | 144,486,979        | 82,062,951         | 29,947,056               | 79,984,364        | 120,801,655       | 106,796,975       | 265,335,929  |
| Share capital                         | 11,850,600    |                  |                   |                          |                    |                    |                    |                    |                          |                   |                   |                   |              |
| Reserves                              | 81,060,051    |                  |                   |                          |                    |                    |                    |                    |                          |                   |                   |                   |              |
| Surplus on revaluation of assets      | 28,803,351    |                  |                   |                          |                    |                    |                    |                    |                          |                   |                   |                   |              |
| Unappropriated profit                 | 70,498,820    |                  |                   |                          |                    |                    |                    |                    |                          |                   |                   |                   |              |
| Minority interest                     | 778,561       |                  |                   |                          |                    |                    |                    |                    |                          |                   |                   |                   |              |
|                                       | 192,991,383   |                  |                   |                          |                    |                    |                    |                    |                          |                   |                   |                   |              |

# Notes To The Consolidated Financial Statements

For the year ended December 31, 2020

|                                       | 2019          |               |                  |                   |                          |                    |                    |                    |                    |                          |                   |                   |                   |              |
|---------------------------------------|---------------|---------------|------------------|-------------------|--------------------------|--------------------|--------------------|--------------------|--------------------|--------------------------|-------------------|-------------------|-------------------|--------------|
|                                       | Total         | Upto 1 day    | Over 1 to 7 days | Over 7 to 14 days | Over 14 days to 1 months | Over 1 or 2 months | Over 2 to 3 months | Over 3 to 6 months | Over 6 to 9 months | Over 9 months to 1 years | Over 1 to 2 years | Over 2 to 3 years | Over 3 to 5 years | Over 5 years |
| (Rupees in '000)                      |               |               |                  |                   |                          |                    |                    |                    |                    |                          |                   |                   |                   |              |
| <b>Assets</b>                         |               |               |                  |                   |                          |                    |                    |                    |                    |                          |                   |                   |                   |              |
| Cash and balances with treasury banks | 142,957,358   | 142,957,358   | -                | -                 | -                        | -                  | -                  | -                  | -                  | -                        | -                 | -                 | -                 | -            |
| Balances with other banks             | 21,371,753    | 17,709,050    | 541,582          | 1,083,933         | 696,814                  | 1,340,374          | -                  | -                  | -                  | -                        | -                 | -                 | -                 | -            |
| Lending to financial institutions     | 6,060,869     | 209,206       | 500,000          | -                 | 1,980,000                | 3,371,663          | -                  | -                  | -                  | -                        | -                 | -                 | -                 | -            |
| Investments                           | 757,441,590   | 1,561,402     | 12,087,461       | 1,484,042         | 165,948,640              | 4,525,813          | 39,055,937         | 37,983,828         | 101,715,552        | 86,779,634               | 111,060,640       | 18,820,516        | 66,033,046        | 111,384,879  |
| Advances                              | 548,472,860   | 116,563,089   | 12,087,746       | 9,807,984         | 34,999,908               | 27,246,925         | 34,646,455         | 66,929,233         | 28,106,558         | 35,278,081               | 46,252,132        | 39,070,405        | 53,513,936        | 44,970,408   |
| Fixed assets                          | 64,201,807    | 9,316         | 55,896           | 65,212            | 254,648                  | 404,607            | 404,874            | 1,212,856          | 12,13,009          | 1,214,158                | 4,082,375         | 4,108,763         | 5,466,376         | 45,729,417   |
| Intangible assets                     | 1,978,975     | 29,291        | 10,296           | 12,012            | 38,546                   | 62,705             | 63,157             | 189,591            | 189,829            | 189,836                  | 442,526           | 173,054           | 506,395           | 71,737       |
| Deferred tax assets                   | 2,918,483     | 11,761        | 28,361           | 33,088            | 80,356                   | 137,078            | 146,531            | 430,140            | 435,730            | 430,140                  | 210,366           | 974,942           | -                 | -            |
| Other assets                          | 69,729,659    | 481,675       | 3,757,122        | 8,150,816         | 8,254,924                | 12,645,114         | 13,810,916         | 3,683,264          | 3,547,514          | 457,875                  | 1,214,143         | 2,141,963         | 11,584,333        | -            |
|                                       | 1,615,133,354 | 279,532,148   | 29,088,464       | 20,637,087        | 212,254,236              | 49,734,279         | 88,127,870         | 109,429,012        | 135,208,192        | 124,349,724              | 163,242,172       | 65,289,643        | 196,104,086       | 202,156,441  |
| <b>Liabilities</b>                    |               |               |                  |                   |                          |                    |                    |                    |                    |                          |                   |                   |                   |              |
| Bills payable                         | 12,795,325    | 426,511       | 2,559,065        | 2,995,576         | 6,824,173                | -                  | -                  | -                  | -                  | -                        | -                 | -                 | -                 | -            |
| Borrowings                            | 92,859,968    | 19,690,252    | 24,261,935       | 5,906,627         | 5,599,571                | 7,876,054          | 3,419,232          | 8,605,720          | 704,824            | 802,705                  | 2,097,344         | 2,217,657         | 3,572,934         | 8,106,113    |
| Deposits and other accounts           | 1,226,593,025 | 1,100,034,930 | 4,344,655        | 8,009,608         | 13,914,022               | 16,239,575         | 24,611,305         | 23,589,167         | 17,022,990         | 11,952,021               | 3,482,589         | 2,137,880         | 1,274,283         | -            |
| Deferred tax liabilities              | 9,132,706     | 10,685        | 16,352           | 12,337            | (30,763)                 | 19,132             | (96,955)           | 81,403             | 71,253             | (16,569)                 | 594,557           | 321,640           | 2,874,074         | 5,277,559    |
| Other liabilities                     | 102,405,513   | 10,311,942    | 8,025,836        | 7,761,515         | 17,612,872               | 5,700,838          | 5,938,865          | 11,057,222         | 6,614,626          | 2,060,339                | 2,694,689         | 3,753,391         | 14,544,640        | 6,328,728    |
|                                       | 1,443,786,537 | 1,130,474,320 | 39,207,843       | 24,675,663        | 43,919,875               | 29,835,599         | 33,871,447         | 43,333,512         | 24,393,693         | 14,796,497               | 8,869,189         | 8,430,568         | 22,265,931        | 19,712,400   |
| <b>Net assets</b>                     | 171,346,817   | (850,942,172) | (10,139,379)     | (4,038,576)       | 168,334,361              | 19,898,680         | 54,256,423         | 66,035,500         | 110,814,499        | 109,553,227              | 154,372,983       | 56,859,075        | 113,838,155       | 182,444,041  |
| Share capital                         | 11,850,600    |               |                  |                   |                          |                    |                    |                    |                    |                          |                   |                   |                   |              |
| Reserves                              | 77,894,829    |               |                  |                   |                          |                    |                    |                    |                    |                          |                   |                   |                   |              |
| Surplus on revaluation of assets      | 24,752,206    |               |                  |                   |                          |                    |                    |                    |                    |                          |                   |                   |                   |              |
| Unappropriated profit                 | 56,108,779    |               |                  |                   |                          |                    |                    |                    |                    |                          |                   |                   |                   |              |
| Non-controlling interest              | 740,403       |               |                  |                   |                          |                    |                    |                    |                    |                          |                   |                   |                   |              |
|                                       | 171,346,817   |               |                  |                   |                          |                    |                    |                    |                    |                          |                   |                   |                   |              |

# Notes To The Consolidated Financial Statements

For the year ended December 31, 2020

## 45.4.2 Maturities of assets and liabilities - based on expected maturities of the assets and liabilities of the Group

2020

|                                       | Upto 1 month  | Over 1 to 3 months | Over 3 to 6 months | Over 6 to 1 year | Over 1 to 2 years | Over 2 to 3 years | Over 3 to 5 years | Over 5 to 10 years | Above 10 years |
|---------------------------------------|---------------|--------------------|--------------------|------------------|-------------------|-------------------|-------------------|--------------------|----------------|
| (Rupees in '000)                      |               |                    |                    |                  |                   |                   |                   |                    |                |
| <b>Assets</b>                         |               |                    |                    |                  |                   |                   |                   |                    |                |
| Cash and balances with treasury banks | 132,053,041   | -                  | -                  | -                | -                 | -                 | -                 | -                  | -              |
| Balances with other banks             | 29,011,521    | 799,031            | -                  | -                | -                 | -                 | -                 | -                  | -              |
| Lending to financial institutions     | 17,968,243    | -                  | -                  | -                | -                 | -                 | -                 | -                  | -              |
| Investments                           | 166,114,420   | 339,389,280        | 114,979,116        | 67,384,316       | 29,832,802        | 75,633,470        | 46,243,587        | 189,391,593        | 7,248,951      |
| Advances                              | 547,685,708   | 76,970,968         | 33,943,819         | 64,487,430       | 86,858,208        | 78,919,201        | 96,374,067        | 54,063,767         | 10,650,764     |
| Fixed assets                          | 63,679,312    | 401,677            | 1,195,045          | 2,381,501        | 4,288,513         | 4,258,016         | 5,084,949         | 8,481,036          | 36,688,927     |
| Intangible assets                     | 1,867,244     | 71,802             | 216,545            | 433,112          | 509,907           | -                 | 159,143           | 43,190             | 274,126        |
| Deferred tax assets                   | 3,925,760     | 236,324            | 693,727            | 1,399,403        | 631,898           | 505,668           | -                 | -                  | -              |
| Other assets                          | 62,793,791    | 17,332,911         | 2,403,832          | 1,314,500        | 2,260,624         | 7,954,884         | 11,115,603        | -                  | -              |
|                                       | 1,895,202,155 | 439,361,876        | 153,432,084        | 137,400,262      | 124,381,952       | 167,271,239       | 158,977,349       | 251,979,586        | 54,862,768     |
| <b>Liabilities</b>                    |               |                    |                    |                  |                   |                   |                   |                    |                |
| Bills payable                         | 26,451,513    | -                  | -                  | -                | -                 | -                 | -                 | -                  | -              |
| Borrowings                            | 184,577,340   | 19,225,222         | 5,798,255          | 1,899,960        | 8,816,080         | 3,763,698         | 4,831,690         | 13,506,035         | -              |
| Deposits and other accounts           | 1,388,737,961 | 60,203,123         | 59,578,918         | 57,889,894       | 333,580,267       | 331,545,069       | 333,084,802       | 121,535,581        | -              |
| Deferred tax liabilities              | 11,416,800    | 111,918            | 98,660             | 951,375          | 698,669           | 1,954,617         | 2,483,113         | 3,097,007          | 1,789,898      |
| Other liabilities                     | 91,027,158    | 25,400,055         | 13,562,414         | 4,410,321        | 4,232,223         | 9,889,368         | 16,491,972        | 4,748,747          | 461,333        |
|                                       | 1,702,210,772 | 270,020,193        | 79,038,247         | 65,151,550       | 347,327,239       | 347,152,752       | 356,891,577       | 142,887,370        | 2,251,231      |
| <b>Net assets</b>                     | 192,991,383   | 169,341,683        | 74,393,837         | 72,248,712       | (222,945,287)     | (179,881,513)     | (197,914,228)     | 109,092,216        | 52,611,537     |
| Share capital                         | 11,850,600    |                    |                    |                  |                   |                   |                   |                    |                |
| Reserves                              | 81,060,051    |                    |                    |                  |                   |                   |                   |                    |                |
| Surplus on revaluation of assets      | 28,803,351    |                    |                    |                  |                   |                   |                   |                    |                |
| Unappropriated profit                 | 70,498,820    |                    |                    |                  |                   |                   |                   |                    |                |
| Minority interest                     | 778,561       |                    |                    |                  |                   |                   |                   |                    |                |
|                                       | 192,991,383   |                    |                    |                  |                   |                   |                   |                    |                |



# Notes To The Consolidated Financial Statements

For the year ended December 31, 2020

2019

|                                       | Total         | Upto 1 month | Over 1 to 3 months | Over 3 to 6 months | Over 6 to 12 months | Over 1 to 2 years | Over 2 to 3 years | Over 3 to 5 years | Over 5 to 10 years | Above 10 years |
|---------------------------------------|---------------|--------------|--------------------|--------------------|---------------------|-------------------|-------------------|-------------------|--------------------|----------------|
| (Rupees in '000)                      |               |              |                    |                    |                     |                   |                   |                   |                    |                |
| <b>Assets</b>                         |               |              |                    |                    |                     |                   |                   |                   |                    |                |
| Cash and balances with treasury banks | 142,957,358   | 142,957,358  | -                  | -                  | -                   | -                 | -                 | -                 | -                  | -              |
| Balances with other banks             | 21,371,753    | 20,031,379   | 1,340,374          | -                  | -                   | -                 | -                 | -                 | -                  | -              |
| Lending to financial institutions     | 6,060,869     | 2,689,205    | 3,371,664          | -                  | -                   | -                 | -                 | -                 | -                  | -              |
| Investments                           | 757,441,590   | 180,171,442  | 43,831,910         | 38,108,079         | 187,726,109         | 111,338,352       | 19,095,957        | 65,310,758        | 105,613,987        | 6,244,996      |
| Advances                              | 548,472,860   | 100,517,088  | 63,393,356         | 57,113,936         | 53,862,562          | 72,777,509        | 65,172,731        | 81,849,276        | 44,506,083         | 9,480,319      |
| Fixed assets                          | 64,201,807    | 387,631      | 718,212            | 1,315,538          | 2,432,421           | 4,062,375         | 2,828,912         | 6,746,400         | 6,073,232          | 39,637,086     |
| Intangible assets                     | 1,978,975     | 90,144       | 125,863            | 189,591            | 379,665             | 442,526           | 173,054           | 506,395           | 71,737             | -              |
| Deferred tax assets                   | 2,918,483     | 153,566      | 283,609            | 430,140            | 865,870             | 210,356           | 974,942           | -                 | -                  | -              |
| Other assets                          | 69,729,659    | 20,644,536   | 26,430,940         | 3,719,452          | 4,005,389           | 1,214,143         | 2,141,963         | 11,573,236        | -                  | -              |
|                                       | 1,615,133,354 | 467,642,349  | 139,495,928        | 100,876,736        | 249,272,016         | 190,045,261       | 90,387,559        | 165,786,065       | 156,265,039        | 55,362,401     |
| <b>Liabilities</b>                    |               |              |                    |                    |                     |                   |                   |                   |                    |                |
| Bills payable                         | 12,795,325    | 12,795,325   | -                  | -                  | -                   | -                 | -                 | -                 | -                  | -              |
| Borrowings                            | 92,859,968    | 55,458,386   | 11,294,285         | 8,605,720          | 1,507,529           | 2,097,344         | 2,217,657         | 3,572,934         | 8,106,113          | -              |
| Deposits and other accounts           | 1,226,593,025 | 80,369,330   | 60,509,999         | 51,460,105         | 65,341,453          | 289,229,540       | 287,884,831       | 287,021,234       | 104,776,533        | -              |
| Deferred tax liabilities              | 9,132,706     | 53,110       | (78,304)           | 36,504             | 51,724              | 594,557           | 320,845           | 2,874,074         | 2,711,159          | 2,569,037      |
| Other liabilities                     | 102,405,513   | 43,712,165   | 11,639,703         | 11,060,721         | 8,671,466           | 2,694,699         | 3,753,391         | 14,544,640        | 5,790,477          | 538,251        |
|                                       | 1,443,786,537 | 192,388,316  | 83,365,683         | 71,163,050         | 75,572,172          | 294,616,140       | 294,176,724       | 308,012,882       | 121,384,282        | 3,107,288      |
| <b>Net assets</b>                     | 171,346,817   | 275,254,033  | 56,130,245         | 29,713,686         | 173,699,844         | (104,570,879)     | (203,789,165)     | (142,226,817)     | 34,880,757         | 52,255,113     |
| Share capital                         | 11,850,600    |              |                    |                    |                     |                   |                   |                   |                    |                |
| Reserves                              | 77,894,829    |              |                    |                    |                     |                   |                   |                   |                    |                |
| Surplus on revaluation of assets      | 24,752,206    |              |                    |                    |                     |                   |                   |                   |                    |                |
| Unappropriated profit                 | 56,108,779    |              |                    |                    |                     |                   |                   |                   |                    |                |
| Non-controlling interest              | 740,403       |              |                    |                    |                     |                   |                   |                   |                    |                |
|                                       | 171,346,817   |              |                    |                    |                     |                   |                   |                   |                    |                |

## Liquidity Gap Reporting

When an asset or liability does not have any contractual maturity date, the period in which these are assumed to mature has been taken as the expected date of maturity. Group regularly conducts an objective and systematic behavioral study using regression analysis technique to ascertain the maturity of its non-contractual assets and liabilities. Core and non-core parts of the non-contractual assets and liabilities are segregated through the behavioral study. Non Core part is placed among the short term maturity buckets i.e. up to 1 Year based on the model results, whereas core part is distributed among the longer terms buckets based on the discussion and decision by the ALCO. Following percentages are used to distribute the core assets and liabilities among longer term buckets:

|                    |     |
|--------------------|-----|
| Over 1 to 2 Years  | 30% |
| Over 2 to 3 Years  | 30% |
| Over 3 to 5 Years  | 30% |
| Over 5 to 10 Years | 10% |

# Notes To The Consolidated Financial Statements

For the year ended December 31, 2020

## 45.5 Derivative Risk

Most business clients have either interest rate exposures arising from debt financing or currency exposures arising out of commercial transactions from import and export of goods. Businesses face the risk of sudden movements in interest rates or foreign exchange rates that may adversely affect their profitability. Group provides solutions to this problem through its derivatives desk in major types of derivative instruments i.e.; forwards, futures, swaps and options. As an Authorized Derivative Dealer (ADD), Group is an active participant in Derivative market and has flexibility in providing a broad range of derivatives products covering both hedging and market making to satisfy customers' needs. As an ADD, the Group offers derivative products which are permitted under the Financial Derivative Business Regulations (FDBR) or as permitted by the State Bank of Pakistan. Before executing Derivative transactions, the Group ensures that the clients understand the risk and reward associated with the derivative being offered. Derivative transactions are executed with appropriate clients only.

Risk management activities take place at the following different levels.

### Strategic Level:

By senior management Assets and Liabilities Management Committee (ALCO), Management Credit and Risk Committee (MC&RC) and the Board of Directors to institute a risk management framework and to ensure provision of all resources and support required for effective risk management on Group-wide basis. The Board provides the overall limits/thresholds for derivatives business.

### Macro Level

By Treasury and FX Group and Risk Management Group, responsible for policy formulation, procedure development and implementation, monitoring and reporting.

### Micro Level:

Treasury Derivatives and Structured Product Desk where risks are actually created and Treasury Operations for settlements of the transactions.

Derivative Risk Management caters the following risks:-

Market Risk arises from changes in market rates such as Interest Rates, Foreign Exchange Rates, Equity Prices, credit spreads and/or commodity prices as well as their correlations and volatilities resulting in a loss to earnings and capital. In line with SBP's regulatory guidelines, Group hedges back-to-back all option transactions with other financial institutions. Group minimizes the exchange rate risk on its Cross Currency Swap Portfolio by hedging the exposure in interGroup market. Group also manages interest rate risk on its Interest Rate Derivatives and Cross Currency Swaps through various sensitivity limits approved by ALCO. Marked to market positions and sensitivity of the derivatives transactions are monitored on regular basis. All individual deals are approved at the appropriate level of authority after analyzing the risk and benefits associated with the deals.

Credit risk is a probable risk of loss resulting from customer's inability to meet contractual obligation that may have adverse impact on Group profitability. Group manages the risk by setting policies and limits for counterparty based on a pre-defined criteria linked with financial health of the customer. The exposure of each counterparty is monitored by Risk Management Function of the Group on daily basis.

Considering small Derivative portfolio, group is not exposed to any liquidity risk. However; Group manages its liquidity risk through Group liquidity risk framework which is defined in relevant Liquidity Risk Section.

Group have adequate system and controls for smooth execution of derivative transactions. Transactions are executed in line with well defined accounting and operational aspects to mitigate the operational risk. Policies and control functions are regularly reviewed on periodic basis. The Group uses a third party's Super Derivative System which provides front end sales and structuring capabilities, end to

# Notes To The Consolidated Financial Statements

For the year ended December 31, 2020

end valuation solutions, risk management systems, back end processing and provides analytical tools to measure various risk exposures and carry out sensitivity analysis.

The Group uses a third party's Super Derivative System which provides front end sales and structuring capabilities, end to end valuation solutions, risk management systems, back end processing and provides analytical tools to measure various risk exposures and carry out sensitivity analysis.

The goal of asset/liability management (ALM) is to properly manage the risk related to changes in interest rates, the mix of balance sheet assets and liabilities, the holding of foreign currencies, and the use of derivatives. Due to thin liquidity in the derivative market, interest rate derivatives are not actively used to manage/alter the interest rate risk profile of the Group."

## 46 EVENTS AFTER THE REPORTING DATE

**46.1** The Board of Directors in its meeting held on February 10, 2021 has announced a final cash dividend in respect of the year ended December 31, 2020 of Rs. 15.00 per share (2019: Rs. 5.00 per share). These consolidated financial statements for the year ended December 31, 2020 do not include the effect of these appropriations which will be accounted for subsequent to the year end.

## 47 GENERAL

Figures have been rounded off to the nearest thousand of rupees unless otherwise stated.

## 48 DATE OF AUTHORIZATION FOR ISSUE

These consolidated financial statements were authorized for issue by the Board of Directors of the Group in their meeting held on February 10, 2021.



**Imran Maqbool**  
President/Chief Executive



**Hammad Khalid**  
Chief Financial Officer



**S.M. Muneer**  
Director



**Mian Umer Mansha**  
Director

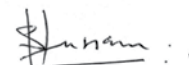

**Shahzad Hussain**  
Director

## Disposal of fixed assets

(refer note 12.2.6)

| Description      | Cost/<br>revalued<br>amount | Accumu-<br>lated<br>depreciation | Book value | Sales pro-<br>ceeds | Mode of disposal     | Particulars of buyers | Location |
|------------------|-----------------------------|----------------------------------|------------|---------------------|----------------------|-----------------------|----------|
| (Rupees '000)    |                             |                                  |            |                     |                      |                       |          |
| <b>Computers</b> |                             |                                  |            |                     |                      |                       |          |
| Laptop           | 88                          | 88                               | -          | 9                   | As per Bank's policy | Muhammad Ali          | Lahore   |
| Laptop           | 116                         | 116                              | -          | 12                  | As per Bank's policy | Usman Hassan          | Lahore   |
| Laptop           | 334                         | 100                              | 244        | 258                 | As per Bank's policy | Nabeela Waheed        | Lahore   |
| Laptop           | 236                         | 197                              | 39         | 44                  | As per Bank's policy | Nadeem Afzal Khan     | Lahore   |
|                  | <b>784</b>                  | <b>501</b>                       | <b>283</b> | <b>323</b>          |                      |                       |          |

## MCB Islamic Bank Limited (A Subsidiary of MCB Bank Limited)

# Statement of Financial Position

AS AT DECEMBER 31, 2020

MCB Islamic bank ( the 'Bank') is operating 187 Islamic banking branches in Pakistan (December 31, 2019: 185 branches).

|                                                     | Note | 2020<br>(Rupees in '000) | 2019        |
|-----------------------------------------------------|------|--------------------------|-------------|
| <b>ASSETS</b>                                       |      |                          |             |
| Cash and balances with treasury banks               |      | 9,872,197                | 10,252,547  |
| Balances with other banks                           |      | 4,996,602                | 8,822,985   |
| Due from financial institutions                     | 1    | 828,790                  | 5,851,664   |
| Investments - net                                   | 2    | 27,617,997               | 16,309,800  |
| Islamic financing and related assets - net          | 3    | 84,896,191               | 51,309,967  |
| Fixed assets                                        |      | 5,548,894                | 5,779,772   |
| Intangible assets                                   |      | 639,428                  | 719,723     |
| Deferred tax assets - net                           |      | 874,878                  | 921,017     |
| Other assets - net                                  |      | 5,895,909                | 5,049,786   |
|                                                     |      | 141,170,886              | 105,017,261 |
| <b>LIABILITIES</b>                                  |      |                          |             |
| Bills payable                                       |      | 2,470,821                | 973,627     |
| Due to financial institutions                       |      | 20,596,773               | 4,127,526   |
| Deposits and other accounts                         | 4    | 99,253,161               | 81,853,511  |
| Liabilities against assets subject to finance lease |      | —                        | —           |
| Sub-ordinated debts                                 |      | —                        | —           |
| Deferred tax liabilities - net                      |      | —                        | —           |
| Other liabilities                                   |      | 8,122,359                | 7,595,796   |
|                                                     |      | 130,443,114              | 94,550,460  |
| <b>NET ASSETS</b>                                   |      |                          |             |
|                                                     |      | 10,727,772               | 10,466,801  |
| <b>REPRESENTED BY</b>                               |      |                          |             |
| Share capital                                       |      | 11,550,000               | 11,550,000  |
| Reserves                                            |      | 68,107                   | 26,444      |
| Surplus on revaluation of assets - net of tax       |      | 473,316                  | 422,326     |
| Accumulated losses                                  | 6    | (1,363,651)              | (1,531,969) |
|                                                     |      | 10,727,772               | 10,466,801  |
| <b>CONTINGENCIES AND COMMITMENTS</b>                |      |                          |             |
|                                                     | 7    |                          |             |

## MCB Islamic Bank Limited (A Subsidiary of MCB Bank Limited)

### Profit and Loss Account

For the year ended December 31, 2020

The profit and loss account of the bank's branches for the year ended 187 (December 31, 2019: 185 branches).

|                                        | Note | 2020<br>(Rupees in '000) | 2019      |
|----------------------------------------|------|--------------------------|-----------|
| Profit / return earned                 | 8    | 9,676,435                | 9,848,819 |
| Profit / return expensed               | 9    | 5,280,989                | 5,855,061 |
| Net spread earned                      |      | 4,395,446                | 3,993,758 |
| <b>OTHER INCOME</b>                    |      |                          |           |
| Fee and commission income              |      | 316,426                  | 294,491   |
| Dividend income                        |      | 47,703                   | 75,383    |
| Foreign exchange income                |      | 209,888                  | 63,685    |
| (Loss) / gain on securities            |      | 14,274                   | (109,983) |
| Other income                           |      | 89,862                   | 19,743    |
| Total other income                     |      | 678,153                  | 343,319   |
| <b>TOTAL INCOME</b>                    |      | 5,073,599                | 4,337,077 |
| <b>OTHER EXPENSES</b>                  |      |                          |           |
| Operating expenses                     |      | 4,654,830                | 4,478,636 |
| Workers welfare fund                   |      | 9,830                    | –         |
| Other charges                          |      | 590                      | 24,386    |
| Total other expenses                   |      | 4,665,250                | 4,503,022 |
| Profit / (loss) before provisions      |      | 408,349                  | (165,945) |
| Provisions and write offs - net        |      | 15,270                   | 199,814   |
| Extra ordinary / unusual items         |      | –                        | –         |
| <b>PROFIT / (LOSS) BEFORE TAXATION</b> |      | 393,079                  | (365,759) |
| Taxation                               |      | 184,763                  | (122,147) |
| <b>PROFIT / (LOSS) AFTER TAXATION</b>  |      | 208,316                  | (243,612) |

## MCB Islamic Bank Limited (A Subsidiary of MCB Bank Limited) Notes to the Financial Statements

For the year ended December 31, 2020

|          | Note                                                 | 2020<br>(Rupees in '000) | 2019             |
|----------|------------------------------------------------------|--------------------------|------------------|
| <b>1</b> | <b>DUE FROM FINANCIAL INSTITUTIONS</b>               |                          |                  |
|          | <b>Secured</b>                                       |                          |                  |
|          | Bai Muajjal receivable - with State Bank of Pakistan | 828,790                  | 3,371,664        |
|          | <b>Unsecured</b>                                     |                          |                  |
|          | Musharaka arrangements                               | –                        | 2,480,000        |
|          |                                                      | <b>828,790</b>           | <b>5,851,664</b> |

**1.1** This represents Bai Muajjal with State Bank of Pakistan carrying profit of 9.14% per annum (2019: average rate of 10.34%) and having maturity till January 29, 2021.

|            |                                                                    | 2020<br>(Rupees in '000) | 2019      |
|------------|--------------------------------------------------------------------|--------------------------|-----------|
| <b>1.3</b> | Particulars of due from financial institutions<br>- local currency | 828,790                  | 5,851,664 |

## 2 INVESTMENTS

### 2.1 Investments by segments:

|                                      | 2020                    |                             |                        |                   | 2019                    |                             |                        |                   |
|--------------------------------------|-------------------------|-----------------------------|------------------------|-------------------|-------------------------|-----------------------------|------------------------|-------------------|
|                                      | Cost/<br>amortised cost | Provision for<br>diminution | Surplus /<br>(deficit) | Carrying<br>value | Cost/<br>amortised cost | Provision for<br>diminution | Surplus /<br>(deficit) | Carrying<br>value |
|                                      | (Rupees in '000)        |                             |                        |                   |                         |                             |                        |                   |
| <b>Federal Government securities</b> |                         |                             |                        |                   |                         |                             |                        |                   |
| GOP Ijarah Sukuks                    | 22,475,798              | –                           | (58,797)               | 22,417,001        | 10,842,666              | –                           | (8,095)                | 10,834,571        |
| WAPDA Sukuks                         | 27,894                  | –                           | (781)                  | 27,113            | 56,404                  | –                           | 711                    | 57,115            |
| Bai Mu'ajjal                         | 2,700,827               | –                           | –                      | 2,700,827         | 2,700,827               | –                           | –                      | 2,700,827         |
| <b>Shares</b>                        |                         |                             |                        |                   |                         |                             |                        |                   |
| Listed companies                     | 1,815,977               | 1,039,436                   | 292,987                | 1,069,528         | 1,908,146               | 1,059,172                   | 175,625                | 1,024,599         |
| <b>Non Government securities</b>     |                         |                             |                        |                   |                         |                             |                        |                   |
| Listed                               | 549,000                 | –                           | 4,119                  | 553,119           | 854,000                 | –                           | 1,309                  | 855,309           |
| Un listed                            | 840,000                 | –                           | 10,409                 | 850,409           | 840,000                 | –                           | (2,621)                | 837,379           |
| Total Investments                    | <b>28,409,496</b>       | <b>1,039,436</b>            | <b>247,937</b>         | <b>27,617,997</b> | <b>17,202,043</b>       | <b>1,059,172</b>            | <b>166,929</b>         | <b>16,309,800</b> |

**2.2** There were no investment given as collateral as at December 31, 2020 (2019: Nil).

**2.3** Provision for diminution in value of investments

|                       | 2020<br>(Rupees in '000) | 2019             |
|-----------------------|--------------------------|------------------|
| Opening balance       | 1,059,172                | 881,903          |
| Charge for the year   | 36,975                   | 177,269          |
| Reversal on disposals | (56,711)                 | –                |
| Closing balance       | <b>1,039,436</b>         | <b>1,059,172</b> |

**MCB Islamic Bank Limited (A Subsidiary of MCB Bank Limited)**
**Notes to the Financial Statements**

For the year ended December 31, 2020

|                                                                             | Note                                                   | 2020<br>(Rupees in '000) | 2019              |
|-----------------------------------------------------------------------------|--------------------------------------------------------|--------------------------|-------------------|
| <b>3</b>                                                                    | <b>ISLAMIC FINANCING AND RELATED ASSETS - NET</b>      |                          |                   |
| Murabaha                                                                    | 3.1                                                    | 12,055,820               | 7,609,830         |
| Musawamah                                                                   |                                                        | –                        | 2,000             |
| Istisna                                                                     |                                                        | 3,455,789                | 2,603,493         |
| Salam                                                                       |                                                        | –                        | 111,287           |
| Ijarah                                                                      | 3.2                                                    | 2,815,368                | 4,881,400         |
| Running Musharaka                                                           |                                                        | 40,757,574               | 16,669,096        |
| Diminishing Musharaka                                                       |                                                        | 24,693,571               | 18,176,482        |
| Staff finance                                                               |                                                        | 1,184,311                | 1,293,082         |
| Islamic financing and related assets - gross                                |                                                        | 84,962,433               | 51,346,670        |
| Less: Provision against non-performing Islamic financing and related assets |                                                        |                          |                   |
| - Specific                                                                  |                                                        | (25,395)                 | (3,340)           |
| - General                                                                   |                                                        | (40,847)                 | (33,363)          |
|                                                                             |                                                        | (66,242)                 | (36,703)          |
| <b>Islamic financing and related assets - net of provisions</b>             |                                                        | <b>84,896,191</b>        | <b>51,309,967</b> |
| <b>3.1</b>                                                                  | <b>Murabaha</b>                                        |                          |                   |
| - Murabaha financing                                                        | 3.1.1                                                  | 4,998,262                | 4,671,163         |
| - Murabaha inventory                                                        |                                                        | 6,494,165                | 2,649,423         |
| - Murabaha inventory - SBP's IRSPWS                                         |                                                        | 27,939                   | –                 |
| - Advances against Murabaha financing                                       |                                                        | 510,454                  | 239,244           |
| - Murabaha financing under Islamic export refinance scheme                  |                                                        | 5,000                    | –                 |
| - Advances against Murabaha financing under Islamic export refinance scheme |                                                        | 20,000                   | 50,000            |
|                                                                             |                                                        | 12,055,820               | 7,609,830         |
| <b>3.1.1</b>                                                                | <b>Murabaha receivable - gross</b>                     | 5,232,085                | 5,005,449         |
| Less: Deferred Murabaha income                                              | 3.1.1.3                                                | 233,823                  | 334,286           |
| Murabaha financing                                                          |                                                        | 4,998,262                | 4,671,163         |
| <b>3.1.1.1</b>                                                              | <b>Movement in Murabaha receivable during the year</b> |                          |                   |
| Opening balance                                                             |                                                        | 5,005,449                | 7,674,572         |
| Sales during the year                                                       |                                                        | 20,865,558               | 25,845,273        |
| Adjusted during the year                                                    |                                                        | (20,638,922)             | (28,514,396)      |
|                                                                             |                                                        | 5,232,085                | 5,005,449         |
| <b>3.1.1.2</b>                                                              | <b>Murabaha sale price during the year</b>             | 20,865,558               | 25,845,273        |
| Murabaha purchase price during the year                                     |                                                        | (19,838,369)             | (24,447,190)      |
|                                                                             |                                                        | 1,027,189                | 1,398,083         |
| <b>3.1.1.3</b>                                                              | <b>Deferred Murabaha income</b>                        |                          |                   |
| Opening balance                                                             |                                                        | 334,286                  | 340,551           |
| Arising during the year                                                     |                                                        | 1,027,189                | 1,398,083         |
| Recognised during the year                                                  |                                                        | (1,127,652)              | (1,404,348)       |
|                                                                             |                                                        | 233,823                  | 334,286           |



## MCB Islamic Bank Limited (A Subsidiary of MCB Bank Limited)

# Notes to the Financial Statements

For the year ended December 31, 2020

|                                                   | Note  | 2020<br>(Rupees in '000) | 2019             |
|---------------------------------------------------|-------|--------------------------|------------------|
| <b>3.2 Ijarah financing and related assets</b>    |       |                          |                  |
| - Net book value of assets in Ijarah under IFAS 2 | 3.2.1 | 2,783,440                | 4,190,369        |
| - Advances against Ijarah                         |       | 31,928                   | 691,031          |
|                                                   |       | <b>2,815,368</b>         | <b>4,881,400</b> |

### 3.2.1 Net book value of assets in Ijarah under IFAS 2

|                                      | 2020                     |                          |                            |                          |                        |                            |                                       |
|--------------------------------------|--------------------------|--------------------------|----------------------------|--------------------------|------------------------|----------------------------|---------------------------------------|
|                                      | As at<br>January 1, 2020 | Addition/<br>(disposal)  | As at<br>December 31, 2020 | As at<br>January 1, 2020 | Charge<br>(disposal)   | As at December<br>31, 2020 | Book Value as at<br>December 31, 2020 |
|                                      | (Rupees in '000)         |                          |                            |                          |                        |                            |                                       |
| Vehicles                             | 3,999,646                | 250,956<br>(1,280,211)   | 2,970,391                  | 1,039,780                | 603,062<br>(591,745)   | 1,051,097                  | 1,919,294                             |
| Equipment and<br>Plant and Machinery | 1,689,096                | 798,286<br>(1,301,211)   | 1,186,171                  | 458,593                  | 349,730<br>(486,298)   | 322,025                    | 864,146                               |
| Total                                | 5,688,742                | 1,049,242<br>(2,581,422) | 4,156,562                  | 1,498,373                | 952,792<br>(1,078,043) | 1,373,122                  | 2,783,440                             |
|                                      | 2019                     |                          |                            |                          |                        |                            |                                       |
|                                      | As at<br>January 1, 2019 | Addition/<br>(disposal)  | As at<br>December 31, 2019 | As at<br>January 1, 2019 | Charge<br>(disposal)   | As at December<br>31, 2019 | Book Value as at<br>December 31, 2019 |
|                                      | (Rupees in '000)         |                          |                            |                          |                        |                            |                                       |
| Vehicles                             | 2,882,357                | 1,501,816<br>(384,527)   | 3,999,646                  | 654,281                  | 629,680<br>(244,181)   | 1,039,780                  | 2,959,866                             |
| Equipment and<br>Plant and Machinery | 1,203,656                | 970,541<br>(485,101)     | 1,689,096                  | 483,657                  | 363,007<br>(388,071)   | 458,593                    | 1,230,503                             |
| Total                                | 4,086,013                | 2,472,357<br>(869,628)   | 5,688,742                  | 1,137,938                | 992,687<br>(632,252)   | 1,498,373                  | 4,190,369                             |

### 3.2.2 Future Ijarah payments receivable

|                           | 2020                     |                                                  |                    |           |
|---------------------------|--------------------------|--------------------------------------------------|--------------------|-----------|
|                           | Not later<br>than 1 year | Later than 1<br>year and not<br>later than years | Over five<br>years | Total     |
|                           | (Rupees in '000)         |                                                  |                    |           |
| Ijarah rental receivables | 1,100,022                | 1,782,989                                        | 3,456              | 2,886,467 |
|                           | 2019                     |                                                  |                    |           |
|                           | Not later<br>than 1 year | Later than 1<br>year and not<br>later than years | Over five<br>years | Total     |
|                           | (Rupees in '000)         |                                                  |                    |           |
| Ijarah rental receivables | 3,094,930                | 3,085,207                                        | 72,419             | 6,252,556 |

## MCB Islamic Bank Limited (A Subsidiary of MCB Bank Limited) Notes to the Financial Statements

For the year ended December 31, 2020

|            |                                                                    | 2020             | 2019       |
|------------|--------------------------------------------------------------------|------------------|------------|
|            |                                                                    | (Rupees in '000) |            |
| <b>3.3</b> | <b>Particulars of Islamic financing and related assets - gross</b> |                  |            |
|            | In local currency                                                  | 84,918,786       | 51,346,670 |
|            | In foreign currency                                                | 43,647           | -          |
|            |                                                                    | 84,962,433       | 51,346,670 |

### 4 DEPOSITS AND OTHER ACCOUNTS

|                               | 2020                 |                        |            | 2019                 |                        |            |
|-------------------------------|----------------------|------------------------|------------|----------------------|------------------------|------------|
|                               | In Local<br>currency | In Foreign<br>currency | Total      | In Local<br>currency | In Foreign<br>currency | Total      |
| (Rupees in '000)              |                      |                        |            |                      |                        |            |
| <b>Customers</b>              |                      |                        |            |                      |                        |            |
| Current deposits              | 28,501,991           | 2,175,509              | 30,677,500 | 20,470,659           | 1,721,169              | 22,191,828 |
| Savings deposits              | 39,831,137           | 1,971,071              | 41,802,208 | 31,630,709           | 2,085,896              | 33,716,605 |
| Term deposits                 | 17,861,765           | 79,103                 | 17,940,868 | 15,049,977           | 72,099                 | 15,122,076 |
| Others                        | 2,693,912            | -                      | 2,693,912  | 4,918,750            | -                      | 4,918,750  |
|                               | 88,888,805           | 4,225,683              | 93,114,488 | 72,070,095           | 3,879,164              | 75,949,259 |
| <b>Financial Institutions</b> |                      |                        |            |                      |                        |            |
| Current deposits              | 148,391              | 138                    | 148,529    | 98,729               | 1,605                  | 100,334    |
| Savings deposits              | 2,462,010            | 1,634                  | 2,463,644  | 1,986,733            | 1,554                  | 1,988,287  |
| Term deposits                 | 3,526,500            | -                      | 3,526,500  | 3,815,631            | -                      | 3,815,631  |
|                               | 6,136,901            | 1,772                  | 6,138,673  | 5,901,093            | 3,159                  | 5,904,252  |
|                               | 95,025,706           | 4,227,455              | 99,253,161 | 77,971,188           | 3,882,323              | 81,853,511 |

|            |                                     | 2020             | 2019       |
|------------|-------------------------------------|------------------|------------|
|            |                                     | (Rupees in '000) |            |
| <b>4.1</b> | <b>Composition of deposits</b>      |                  |            |
|            | Individuals                         | 43,739,410       | 35,007,567 |
|            | Government (Federal and Provincial) | 4,253,371        | 7,692,691  |
|            | Public Sector Entities              | 4,861,494        | 268,859    |
|            | Banking Companies                   | 2,075            | 1,037,961  |
|            | Non-Banking Financial Institutions  | 6,136,598        | 4,866,288  |
|            | Private Sector                      | 40,260,213       | 32,980,145 |
|            |                                     | 99,253,161       | 81,853,511 |

**4.2** This includes deposits eligible to be covered under takaful arrangements amounting to Rs.61,239.189 million (2019: 51,165.607 million).

|          |                                                | 2020             | 2019     |
|----------|------------------------------------------------|------------------|----------|
|          |                                                | (Rupees in '000) |          |
| <b>5</b> | <b>Charity balance</b>                         |                  |          |
|          | Opening balance                                | 57,782           | 25,402   |
|          | Additions during the year                      |                  |          |
|          | - Received from customers against late payment | 42,477           | 45,958   |
|          | - Dividend purification amount                 | 771              | 7,383    |
|          | - Profit on charity saving account             | 2,085            | 1,539    |
|          |                                                | 45,333           | 54,880   |
|          | Charity paid during the year                   | (56,500)         | (22,500) |
|          | Closing balance                                | 46,615           | 57,782   |

## MCB Islamic Bank Limited (A Subsidiary of MCB Bank Limited) Notes to the Financial Statements

For the year ended December 31, 2020

|            |                                                                                                                                                                   | 2020             | 2019        |
|------------|-------------------------------------------------------------------------------------------------------------------------------------------------------------------|------------------|-------------|
|            |                                                                                                                                                                   | (Rupees in '000) |             |
| <b>5.1</b> | <b>Charity was paid to the following institutions:</b>                                                                                                            |                  |             |
|            | The Patients' Bahbood Society for AKUH                                                                                                                            | 1,000            | 1,000       |
|            | Al-Khidmat Foundation                                                                                                                                             | 2,000            | –           |
|            | Arthritis Care                                                                                                                                                    | 2,000            | 1,000       |
|            | Aziz Jehan Begum Trust for the Blind                                                                                                                              | 3,000            | 1,000       |
|            | Chiniot Anjuman Islamia                                                                                                                                           | 1,000            | –           |
|            | Chiniot Blood Bank and Dialysis Centre                                                                                                                            | 1,000            | –           |
|            | Family Welfare Society                                                                                                                                            | 3,000            | 1,000       |
|            | Fatmid Foundation                                                                                                                                                 | 3,000            | 1,000       |
|            | Indus Hospital                                                                                                                                                    | 5,000            | 2,000       |
|            | Infaq Memorial Trust                                                                                                                                              | 3,000            | 1,000       |
|            | Layton Rehmatullah Benevolent Trust                                                                                                                               | 4,000            | 2,000       |
|            | Mind Organization                                                                                                                                                 | 2,000            | 1,000       |
|            | Pink Ribbon                                                                                                                                                       | 2,000            | 5,000       |
|            | Saleem Memorial Trust Hospital                                                                                                                                    | 6,000            | –           |
|            | Saylani Welfare                                                                                                                                                   | 2,000            | –           |
|            | Shaukat Khanam Memorial Cancer Hospital                                                                                                                           | 3,000            | 2,000       |
|            | Sindh Institute of Urology & Transplantation (SIUT)                                                                                                               | 3,000            | 2,000       |
|            | The Citizens Foundation                                                                                                                                           | 4,000            | 2,000       |
|            | Jahandad Society for Community Development                                                                                                                        | 1,500            | –           |
|            | The Lahore Hospital Welfare Society                                                                                                                               | 2,000            | 500         |
|            | Al - Mustafa Welfare Society                                                                                                                                      | 500              | –           |
|            | Frontier Foundation blood transfusion Centre                                                                                                                      | 500              | –           |
|            | Zubaida Medical Center                                                                                                                                            | 1,000            | –           |
|            | Mofad e Amma Chiniot Sheikh Association                                                                                                                           | 1,000            | –           |
|            |                                                                                                                                                                   | 56,500           | 22,500      |
| <b>5.2</b> | Charity was not paid to any staff of the Bank or to any individual / organisation in which a director or his spouse had any interest at any time during the year. |                  |             |
|            |                                                                                                                                                                   | 2020             | 2019        |
|            |                                                                                                                                                                   | (Rupees in '000) |             |
| <b>6</b>   | <b>ISLAMIC BANKING BUSINESS ACCUMULATED LOSS</b>                                                                                                                  |                  |             |
|            | Opening balance                                                                                                                                                   | (1,531,969)      | (1,289,202) |
|            | Islamic banking profit / loss for the year                                                                                                                        | 393,079          | (365,759)   |
|            | Transfer to statutory reserve                                                                                                                                     | (41,663)         | –           |
|            | Taxation                                                                                                                                                          | (184,763)        | 122,147     |
|            | Other adjustments                                                                                                                                                 | 1,665            | 845         |
|            | Closing balance                                                                                                                                                   | (1,363,651)      | (1,531,969) |
| <b>7</b>   | <b>CONTINGENCIES AND COMMITMENTS</b>                                                                                                                              |                  |             |
|            | Guarantees                                                                                                                                                        | 7.1              | 8,000,674   |
|            | Commitments                                                                                                                                                       | 7.2              | 20,583,025  |
|            | Other contingent liabilities                                                                                                                                      |                  | 437,433     |
|            |                                                                                                                                                                   |                  | 29,021,132  |
| <b>7.1</b> | <b>Guarantees:</b>                                                                                                                                                |                  |             |
|            | Performance guarantees                                                                                                                                            | 3,935,124        | 3,431,726   |
|            | Other guarantees                                                                                                                                                  | 4,065,550        | 3,035,320   |
|            |                                                                                                                                                                   | 8,000,674        | 6,467,046   |

## MCB Islamic Bank Limited (A Subsidiary of MCB Bank Limited) Notes to the Financial Statements

For the year ended December 31, 2020

|              |                                                                     | 2020              | 2019              |
|--------------|---------------------------------------------------------------------|-------------------|-------------------|
|              |                                                                     | (Rupees in '000)  |                   |
| <b>7.2</b>   | <b>Commitments:</b>                                                 |                   |                   |
|              | Documentary credits and short-term trade-related transactions       |                   |                   |
|              | Letters of credit                                                   | 7,654,971         | 7,818,321         |
|              | Commitments in respect of:                                          |                   |                   |
|              | Forward foreign exchange contracts                                  | 11,909,879        | 3,363,957         |
|              | Commitments for acquisition of:                                     |                   |                   |
|              | Fixed assets                                                        | –                 | –                 |
|              | Intangible assets                                                   | 10,724            | 8,940             |
|              | Other commitments                                                   | 1,007,451         | 307,755           |
|              |                                                                     | <b>20,583,025</b> | <b>11,498,973</b> |
| <b>7.2.1</b> | <b>Commitments in respect of forward foreign exchange contracts</b> |                   |                   |
|              | Purchase                                                            | 5,046,837         | 882,210           |
|              | Sale                                                                | 6,863,042         | 2,481,747         |
|              |                                                                     | <b>11,909,879</b> | <b>3,363,957</b>  |
| <b>7.2.2</b> | <b>Other Commitments</b>                                            |                   |                   |
|              | Commitments to extend credit                                        | 1,007,451         | 307,755           |

**7.2.2.1** Other than those stated above, the Bank makes commitment(s) to extend credit in the normal course of business including related parties but these being revocable commitments do not attract any penalty or expense if the facility is unilaterally withdrawn.

|            |                                                 | 2020             | 2019    |
|------------|-------------------------------------------------|------------------|---------|
|            |                                                 | (Rupees in '000) |         |
| <b>7.3</b> | <b>Other contingent liabilities</b>             |                  |         |
|            | Claim against the Bank not acknowledged as debt | 437,433          | 431,439 |

This includes claim by a third party against the Bank, amounting to Rs. 425.820 million which is being contested in the Court of law. The suit has been disposed off by the Court vide Order dated May 10, 2019 wherein the status quo has been ordered to be maintained with respect to bank guarantee and the matter has been referred to arbitration with the consent of the parties. However the Bank has not received any official notice to attend the arbitration proceedings till date.

In addition to the above, this includes claim by different parties against the bank amounting to Rs. 11.6 million which is pending before the court.

The Sindh Revenue Board (SRB) has issued order under “Sindh Sales Tax on Services Act, 2011”, for the year 2016 thereby raising demand of Rs. 0.642 million. The Bank has filed appeal before Commissioner of Inland Revenue Appeals which is pending adjudication. The management of the Bank, in consultation with its tax advisor, is confident that the decision in respect of the above matter would be in the Bank’s favor and accordingly no provision has been made in these financial statements with respect thereto.

## MCB Islamic Bank Limited (A Subsidiary of MCB Bank Limited) Notes to the Financial Statements

For the year ended December 31, 2020

|          |                                                          | 2020             | 2019      |
|----------|----------------------------------------------------------|------------------|-----------|
|          |                                                          | (Rupees in '000) |           |
| <b>8</b> | <b>PROFIT / RETURN EARNED</b>                            |                  |           |
|          | Financings                                               | 7,044,066        | 7,288,776 |
|          | Investments in                                           |                  |           |
|          | - available for sale securities                          | 1,853,889        | 1,411,649 |
|          | - held to maturity securities                            | 411,594          | 400,202   |
|          |                                                          | 2,265,483        | 1,811,851 |
|          | Musharaka arrangements with financial institutions       | 215,060          | 555,462   |
|          | Deposits with financial institutions                     | 151,826          | 192,730   |
|          |                                                          | 9,676,435        | 9,848,819 |
| <b>9</b> | <b>PROFIT / RETURN EXPENSED</b>                          |                  |           |
|          | Deposits and other accounts                              | 4,340,687        | 4,936,521 |
|          | Musharaka arrangements with the State                    |                  |           |
|          | Bank of Pakistan under IERS                              | 66,345           | 45,860    |
|          | Musharaka arrangements with other financial institutions | 468,267          | 490,506   |
|          | Musharaka arrangements with other institution            | 16,900           | 7,973     |
|          | Unwinding of liability against right-of-use of asset     | 388,790          | 374,201   |
|          |                                                          | 5,280,989        | 5,855,061 |

### 10 PROFIT / (LOSS) DISTRIBUTION TO DEPOSITORS' AND SPECIFIC POOLS

**10.1** The Bank is maintaining the following types of pools for profit declaration and distribution:

- 1) General Pool
- 2) IERS Musharaka Pool
- 3) Treasury Musharaka / Mudaraba Pools
- 4) Special Musharaka Pool
- 5) Equity Pool

**Features, risks and rewards of each pool are given below:**

#### 1) General Pool

The Bank manages one general pool for its depositors' (Rabbul Mal) maintaining deposits in both local and foreign currencies and also commingled its equity in this pool. The income (gross income less direct expenses) generated from the pool is distributed between Bank's equity and depositors' fund in proportion to their respective share in the pool. Under the Mudaraba mechanism, the income so distributed to depositors' fund is shared between the Bank (Mudarib) and depositors' (Rabbul Mal) according to the pre-agreed profit sharing ratios and assigned weightages.

The deposits and funds accepted under the General Pool are deployed to diversified sectors and avenues of the economy / business mainly to 'Agriculture, Forestry & Fishing', 'Textile & Allied', 'Food & Allied', 'Distribution & Trade', 'Investment in Government of Pakistan Ijarah Sukuk', etc.

## MCB Islamic Bank Limited (A Subsidiary of MCB Bank Limited) Notes to the Financial Statements

For the year ended December 31, 2020

### Parameters associated with risk and rewards

Following are the consideration attached with risk and reward of general pool:

- Period, return, safety, security and liquidity of investment.
- Financing proposals under process at various stages and likely to be extended in the near future.
- Expected amount of procurement of deposit during coming days as a result of concerted marketing efforts of the Bank.
- Element of risk attached to various types of investments.
- SBP rules and Shari'ah clearance.

### 2) Islamic Export Refinance Scheme (IERS) Musharaka Pool

The Bank manages IERS Musharaka Pool for funds accepted from SBP under IERS. Under the PLS mechanism, the Bank generates revenues from the pool funds which are shared with the SBP according to the pre-agreed profit sharing ratios. Musharaka investments from the SBP under IERS are channeled towards the export sector of the economy and other financings as per SBP guidelines.

### 3) Treasury Musharaka / Mudaraba Pools

The Bank accepts funds from other banks to manage its liquidity under Musharaka / Mudaraba mode. The funds accepted are tagged to remunerative assets having maturity on or after the period for which funds are accepted. The revenue generated from the pool asset is shared between the bank and other member of the pool according to pre-agreed profit sharing ratios or assigned weightages accordingly.

### 4) Special Musharaka Pool

The Bank under Musharaka agreement accepts funds from institution(s) (other than banks). The comingled funds under this arrangement are deployed in remunerative assets as per the terms of agreement. The revenue generated from these assets are then shared as per pre-agreed profit sharing ratio.

### 5) Equity Pool

The Equity Pool consists of Bank's equity and funds accepted on Qard (non-remunerative current deposit account) basis. The funds of this pool are invested in various assets or ventures which are higher in risk or having longer funding period. In addition to that all staff financings are financed by this pool. The risk of assets in the pool is borne by the Bank.

### Charging of expenses

Direct expenses are being charged to respective pools, while indirect expenses such as general and administrative expenses are being borne by the Bank as Mudarib. No provision expense is charged to the pool unless it is written off. The direct expenses charged to the pool may include depreciation of Ijarah assets, premium amortization on Sukuk, impairment losses due to physical damages to specific assets in pools etc. However, this is not an exhaustive list; the Bank's pool management framework and the respective pool creation memo may identify and specify these and any other similar expenses to be charged to the pool.

## MCB Islamic Bank Limited (A Subsidiary of MCB Bank Limited)

# Notes to the Financial Statements

For the year ended December 31, 2020

10.2 Following are the detail of profit distribution among different pool maintained by the Bank:

| 2020                                 |                                             |                    |                                 |                     |                                |              |                        |
|--------------------------------------|---------------------------------------------|--------------------|---------------------------------|---------------------|--------------------------------|--------------|------------------------|
| Pool Description                     | Profit Rate & weightage announcement period | Profit Rate Earned | Profit Sharing Ratio of Mudarib | Mudarib Fee         | Profit Rate return distributed | General Hiba | Amount of General Hiba |
|                                      |                                             | %                  | %                               | Rupees in thousands | %                              | %            | Rupees in thousands    |
| General Pool                         | Monthly                                     | 10.84              | 50.00                           | 3,558,858           | 6.53                           | 20.30        | 722,410                |
| Pool Description                     | Profit Rate & weightage announcement period | Profit Rate Earned | Profit Sharing Ratio of Mudarib | Mudarib Fee         | Profit Rate return distributed | General Hiba | Amount of General Hiba |
|                                      |                                             | %                  | %                               | Rupees in thousands | %                              | %            | Rupees in thousands    |
| Islamic Export Refinance (IERS) Pool | Monthly                                     | 6.90               | -                               | -                   | 2.00                           | -            | -                      |
| Treasury Musharaka/Mudaraba Pool     | As required                                 | 9.60               | -                               | -                   | 7.25                           | -            | -                      |
| Special Musharakh Pool               | Monthly                                     | 10.48              | -                               | -                   | 9.21                           | -            | -                      |
| Equity Pool                          | Monthly                                     | 5.33               | -                               | -                   | -                              | -            | -                      |
| 2019                                 |                                             |                    |                                 |                     |                                |              |                        |
| Pool Description                     | Profit Rate & weightage announcement period | Profit Rate Earned | Profit Sharing Ratio of Mudarib | Mudarib Fee         | Profit Rate return distributed | General Hiba | Amount of General Hiba |
|                                      |                                             | %                  | %                               | Rupees in thousands | %                              | %            | Rupees in thousands    |
| General Pool                         | Monthly                                     | 13.36              | 50.00                           | 3,710,740           | 8.82                           | 31.84        | 1,181,467              |
| Pool Description                     | Profit Rate & weightage announcement period | Profit Rate Earned | Profit Sharing Ratio of Mudarib | Mudarib Fee         | Profit Rate return distributed | General Hiba | Amount of General Hiba |
|                                      |                                             | %                  | %                               | Rupees in thousands | %                              | %            | Rupees in thousands    |
| Islamic Export Refinance (IERS) Pool | Monthly                                     | 7.92               | -                               | -                   | 2.00                           | -            | -                      |
| Treasury Musharaka/Mudaraba Pool     | As required                                 | 11.51              | -                               | -                   | 9.88                           | -            | -                      |
| Special Musharakh Pool               | Monthly                                     | 8.69               | -                               | -                   | 8.08                           | -            | -                      |
| Equity Pool                          | Monthly                                     | 1.58               | -                               | -                   | -                              | -            | -                      |

## Branch Network 2020

As of December 31, 2020

| Retail Banking Group - Central |                   |                 |                     |
|--------------------------------|-------------------|-----------------|---------------------|
| Circle/ No. of Branches        | Region            | No. of Branches | No. of Sub-Branches |
| GUJRANWALA - 122               | Gujranwala        | 32              | -                   |
|                                | Gujrat            | 27              | -                   |
|                                | Mandi Bahauddin   | 28              | -                   |
|                                | Sialkot           | 34              | -                   |
| LAHORE EAST - 72               | Lahore Defence    | 25              | -                   |
|                                | Lahore Gulberg    | 25              | -                   |
|                                | Lahore Johar Town | 22              | -                   |
| LAHORE WEST - 92               | Lahore City       | 32              | -                   |
|                                | Lahore The Mall   | 32              | -                   |
|                                | Shiekhupura       | 27              | -                   |
| <b>Total RBG - Central</b>     |                   | <b>286</b>      | <b>-</b>            |
| Retail Banking Group - North   |                   |                 |                     |
| Circle/ No. of Branches        | Region            | No. of Branches | No. of Sub-Branches |
| ABBOTTABAD - 93                | Abbottabad        | 27              | -                   |
|                                | Attock            | 20              | -                   |
|                                | Muzaffarabad A.K. | 22              | -                   |
|                                | Swat              | 24              | 1                   |
| ISLAMABAD - 93                 | Fateh Jang        | 22              | -                   |
|                                | Islamabad         | 26              | -                   |
|                                | Rawalpindi Cantt  | 24              | -                   |
|                                | Rawalpindi City   | 21              | -                   |
| PESHAWAR - 98                  | Kohat             | 27              | -                   |
|                                | Mardan            | 23              | -                   |
|                                | Peshawar East     | 22              | 1                   |
|                                | Peshawar West     | 26              | -                   |
| <b>Total RBG - North</b>       |                   | <b>284</b>      | <b>02</b>           |
| Retail Banking Group - West    |                   |                 |                     |
| Circle/ No. of Branches        | Region            | No. of Branches | No. of Sub-Branches |
| FAISALABAD - 87                | Faisalabad        | 30              | -                   |
|                                | Faisalabad City   | 28              | 1                   |
|                                | Toba Tek Singh    | 29              | -                   |
| JHELUM - 78                    | Chakwal           | 26              | -                   |
|                                | Jhelum            | 26              | -                   |
|                                | Mirpur A.K.       | 26              | -                   |
| SARGODHA - 94                  | Jhang             | 28              | 2                   |
|                                | Mianwali          | 31              | -                   |
|                                | Sargodha          | 35              | 1                   |
| <b>Total RBG - West</b>        |                   | <b>259</b>      | <b>04</b>           |



## Branch Network 2020

As of December 31, 2020

| Retail Banking Group - East    |                 |                 |                     |
|--------------------------------|-----------------|-----------------|---------------------|
| Circle/ No. of Branches        | Region          | No. of Branches | No. of Sub-Branches |
| BAHAWALPUR - 104               | Bahawalnagar    | 18              | –                   |
|                                | Bahawalpur      | 28              | –                   |
|                                | Rahim Yar Khan  | 31              | –                   |
|                                | Vehari          | 27              | –                   |
| MULTAN - 114                   | Dera Ghazi Khan | 20              | –                   |
|                                | Multan          | 30              | 1                   |
|                                | Muzaffargarh    | 20              | –                   |
|                                | Okara           | 21              | 1                   |
|                                | Sahiwal         | 23              | –                   |
| <b>Total RBG - East</b>        |                 | <b>218</b>      | <b>02</b>           |
| Retail Banking Group - Karachi |                 |                 |                     |
| Circle/ No. of Branches        | Region          | No. of Branches | No. of Sub-Branches |
| KARACHI CITY - 58              | Karachi City    | 29              | –                   |
|                                | Karachi North   | 29              | –                   |
| KARACHI EAST - 46              | Karachi East    | 24              | –                   |
|                                | Karachi South   | 22              | –                   |
| KARACHI WEST - 46              | Karachi Central | 22              | –                   |
|                                | Karachi West    | 24              | –                   |
| <b>Total RBG - Karachi</b>     |                 | <b>150</b>      | <b>–</b>            |
| Retail Banking Group - South   |                 |                 |                     |
| Circle/ No. of Branches        | Region          | No. of Branches | No. of Sub-Branches |
| HYDERABAD - 77                 | Hyderabad       | 28              | –                   |
|                                | Mirpurkhas      | 25              | 1                   |
|                                | Nawabshah       | 24              | –                   |
| QUETTA - 50                    | Khuzdar         | 14              | –                   |
|                                | Makran          | 10              | –                   |
|                                | Quetta          | 26              | 3                   |
| SUKKUR - 75                    | Larkana         | 24              | –                   |
|                                | Naushero Feroze | 24              | –                   |
|                                | Sukkur          | 27              | –                   |
| <b>Total RBG - South</b>       |                 | <b>202</b>      | <b>4</b>            |
| Wholesale Banking Group        |                 |                 |                     |
| WBG Branches                   |                 | 11*             | –                   |
| *EPZ not included              |                 |                 |                     |
| Consumer Banking Group         |                 |                 |                     |
| Privilege Banking              |                 | 8               | –                   |

## Branch Network 2020

As of December 31, 2020

| Overseas Branches / International Banking |              | No. of Branches |                     |
|-------------------------------------------|--------------|-----------------|---------------------|
| Colombo                                   |              | 1               |                     |
| Galle                                     |              | 1               |                     |
| Kandy                                     |              | 1               |                     |
| Kattankudy                                |              | 1               |                     |
| Kollupitiya                               |              | 1               |                     |
| Maradana                                  |              | 1               |                     |
| Pettah                                    |              | 1               |                     |
| Wellawatte                                |              | 1               |                     |
| MCB Offshore Banking Unit (OBU) Bahrain   |              | 1               |                     |
| MCB Dubai Wholesale Branch (UAE)          |              | 1               |                     |
| EPZ                                       |              | 1               |                     |
| <b>TOTAL</b>                              |              | <b>11</b>       |                     |
| <b>Groupwise</b>                          |              |                 |                     |
| Group                                     | Circles      | No. of Branches | No. of Sub-Branches |
| RBG–Central                               | 3            | 286             | –                   |
| RBG–North                                 | 3            | 284             | 2                   |
| RBG–West                                  | 3            | 259             | 4                   |
| RBG–East                                  | 2            | 218             | 2                   |
| RBG–Karachi                               | 3            | 150             | –                   |
| RBG–South                                 | 3            | 202             | 4                   |
| WBG                                       | 3            | 11              | –                   |
| CBG - Privilege Banking                   | –            | 8               | –                   |
| <b>Total</b>                              | <b>20</b>    | <b>1,418</b>    | <b>12</b>           |
| Overseas                                  | –            | 10              | –                   |
| EPZ                                       | –            | 1               | –                   |
| <b>Grand Total</b>                        | <b>20</b>    | <b>1,429</b>    | <b>12</b>           |
| <b>Province-Wise</b>                      |              |                 |                     |
| Provinces/Territories/AJK                 | Branches     | Sub-Branches    | Total               |
| Azad Jammu & Kashmir                      | 40           | –               | 40                  |
| Balochistan                               | 52           | 3               | 55                  |
| Federal Capital Territory                 | 34           | –               | 34                  |
| Gilgit–Baltistan                          | 6            | –               | 6                   |
| Khyber Pakhtunkhwa                        | 154          | 2               | 156                 |
| Punjab                                    | 827          | 6               | 833                 |
| Sindh                                     | 305          | 1               | 306                 |
| <b>Domestic Total</b>                     | <b>1,418</b> | <b>12</b>       | <b>1,430</b>        |
| Overseas Branches / International Banking | 10           | –               | 10                  |
| EPZ                                       | 1            | –               | 1                   |
| <b>Grand Total</b>                        | <b>1,429</b> | <b>12</b>       | <b>1,441</b>        |

## Pattern of Shareholding

As of December 31, 2020

| No. of Shareholders | Shareholdings |            | Total Shares Held    |
|---------------------|---------------|------------|----------------------|
|                     | From          | To         |                      |
| 27,680              | 1             | 100        | 885,188              |
| 13,568              | 101           | 500        | 3,316,749            |
| 5,713               | 501           | 1,000      | 4,245,735            |
| 7,589               | 1,001         | 5,000      | 13,183,013           |
| 449                 | 5,001         | 10,000     | 3,268,384            |
| 477                 | 10,001        | 50,000     | 10,612,463           |
| 138                 | 50,001        | 100,000    | 9,763,934            |
| 171                 | 100,001       | 500,000    | 41,249,898           |
| 49                  | 500,001       | 1,000,000  | 35,286,220           |
| 64                  | 1,000,001     | 5,000,000  | 129,262,103          |
| 8                   | 5,000,001     | 10,000,000 | 51,302,800           |
| 4                   | 10,000,001    | 15,000,000 | 48,532,209           |
| 3                   | 15,000,001    | 25,000,000 | 54,066,041           |
| 12                  | 25,000,001    | Above      | 780,085,269          |
| <b>55,925</b>       |               |            | <b>1,185,060,006</b> |

## Categories of Shareholders

As of December 31, 2020

| Categories of Shareholders                                                    | Shares Held          | Percentage       |
|-------------------------------------------------------------------------------|----------------------|------------------|
| Directors, Chief Executive Officer, their Spouses and Minor Children          | 119,654,330          | 10.0969%         |
| Associated Companies, Undertakings and Related Parties                        | 218,402,532          | 18.4297%         |
| NIT and ICP                                                                   | 912                  | 0.0001%          |
| Banks, Development Financial Institutions, Non Banking Financial Institutions | 20,267,864           | 1.7103%          |
| Insurance Companies                                                           | 106,815,039          | 9.0135%          |
| Modarabas and Mutual Funds                                                    | 11,629,076           | 0.9813%          |
| Shareholders Holding 10%                                                      | 222,606,147          | 18.7844%         |
| General Public Local                                                          | 137,247,548          | 11.5815%         |
| General Public Foreign                                                        | 4,874,244            | 0.4113%          |
| Others                                                                        | 343,562,314          | 28.9911%         |
| <b>Grand Total</b>                                                            | <b>1,185,060,006</b> | <b>100.0000%</b> |

## Categories of Shareholders

As of December 31, 2020

| Categories of Shareholders                                                           | Shares Held        | Percentage      |
|--------------------------------------------------------------------------------------|--------------------|-----------------|
| <b>Directors, Chief Executive Officer, their Spouses and Minor Children</b>          |                    |                 |
| Mian Mohammad Mansha                                                                 | 7,834              | 0.0007%         |
| Naz Mansha                                                                           | 6,424,057          | 0.5421%         |
| S. M. Muneer                                                                         | 2,059              | 0.0002%         |
| Muhammad Tariq Rafi                                                                  | 32,094,304         | 2.7082%         |
| Mrs. Nighat Tariq                                                                    | 5,715,093          | 0.4823%         |
| Mian Umer Mansha                                                                     | 31,986,378         | 2.6991%         |
| Iqraa Hassan Mansha                                                                  | 8,000              | 0.0007%         |
| Mian Hassan Mansha                                                                   | 43,363,671         | 3.6592%         |
| Muhammad Ali Zeb                                                                     | 550                | 0.0000%         |
| Mohd Suhail Amar Suresh bin Abdullah                                                 | 884                | 0.0001%         |
| Yahya Saleem                                                                         | 500                | 0.0000%         |
| Salman Khalid Butt                                                                   | 49,000             | 0.0041%         |
| Shahzad Hussain                                                                      | 500                | 0.0000%         |
| Masood Ahmed Puri                                                                    | 1,000              | 0.0001%         |
| Shariffuddin Bin Khalid                                                              | 500                | 0.0000%         |
|                                                                                      | <b>119,654,330</b> | <b>10.0969%</b> |
| <b>Associated Companies, Undertakings and Related Parties</b>                        |                    |                 |
| Nishat Mills Limited                                                                 | 88,015,291         | 7.4271%         |
| Adamjee Insurance Company Limited                                                    | 47,827,287         | 4.0359%         |
| Siddiqsons Limited                                                                   | 14,276,462         | 1.2047%         |
| Adamjee Life Assurance Company Ltd. - IMF                                            | 5,740,538          | 0.4844%         |
| Adamjee Life Assurance Company Limited - NUIL Fund                                   | 446,311            | 0.0377%         |
| Adamjee Life Assurance Co. Ltd. - DGF                                                | 63,500             | 0.0054%         |
| Nishat (Aziz Avenue) Hotels and Properties Limited                                   | 141,950            | 0.0120%         |
| Nishat Real Estates Development Company (Private) Limited                            | 54,500             | 0.0046%         |
| Trustee - MCB Provident Fund Pak Staff                                               | 34,166,060         | 2.8831%         |
| Trustee - MCB Employees Pension Fund                                                 | 17,793,759         | 1.5015%         |
| Trustee Nishat (Chunian) Limited Employees Provident Fund                            | 8,857              | 0.0007%         |
| Nishat Mills Limited Employees Provident Fund Trust                                  | 8,284,390          | 0.6991%         |
| Trustees of Adamjee Insurance Company Ltd. Employees Provident Fund                  | 66,138             | 0.0056%         |
| CDC - Trustee MCB Pakistan Asset Allocation Fund                                     | 196,586            | 0.0166%         |
| CDC - Trustee Pakistan Capital Market Fund                                           | 65,038             | 0.0055%         |
| CDC - Trustee MCB Pakistan Stock Market Fund                                         | 1,255,865          | 0.1060%         |
|                                                                                      | <b>218,402,532</b> | <b>18.4297%</b> |
| <b>NIT and ICP</b>                                                                   |                    |                 |
| Investment Corporation of Pakistan                                                   | 912                | 0.0001%         |
|                                                                                      | <b>912</b>         | <b>0.0001%</b>  |
| <b>Banks, Development Financial Institutions, Non Banking Financial Institutions</b> |                    |                 |
| The Bank of Punjab                                                                   | 614,379            | 0.0518%         |
| Prudential Investment Bank Ltd.                                                      | 1,393              | 0.0001%         |
| Crescent Investment Bank Ltd.                                                        | 590                | 0.0000%         |
| Saudi Pak Industrial & Agricultural Investment Co. (Pvt) Ltd                         | 607,992            | 0.0513%         |
| Trust Leasing Corporation Ltd.                                                       | 101                | 0.0000%         |
| Universal Leasing Corporation Ltd.                                                   | 1                  | 0.0000%         |
| Islamic Investment Bank Ltd.                                                         | 4                  | 0.0000%         |
| National Development Finance Corporation                                             | 433                | 0.0000%         |
| M/s. Al Faysal Investment Bank Ltd.                                                  | 49                 | 0.0000%         |
| Interasia Leasing Company Limited                                                    | 950                | 0.0001%         |
| Pakistan Kuwait Investment Co. (Pvt) Ltd.                                            | 2,400,000          | 0.2025%         |
| Allied Bank Limited                                                                  | 2,821,600          | 0.2381%         |
| Habib Bank Limited                                                                   | 1,603,481          | 0.1353%         |
| Faysal Bank Limited                                                                  | 2,855,170          | 0.2409%         |
| Habib Metropolitan Bank Limited                                                      | 491,900            | 0.0415%         |
| Bank Al Habib Limited                                                                | 700,000            | 0.0591%         |
| Soneri Bank Limited                                                                  | 1,500,000          | 0.1266%         |
| Saudi Pak Leasing Company Limited                                                    | 495                | 0.0000%         |
| Bank Alfalah Limited                                                                 | 2,100,000          | 0.1772%         |

|                                        |                   |                |
|----------------------------------------|-------------------|----------------|
| The Punjab Provincial Cooperative Bank | 1,558             | 0.0001%        |
| Escorts Investment Bank Limited        | 225               | 0.0000%        |
| National Bank of Pakistan              | 2,399,436         | 0.2025%        |
| Askari Bank Limited                    | 1,051,600         | 0.0887%        |
| House Building Finance Company Limited | 41,951            | 0.0035%        |
| Pair Investment Company Limited        | 174,570           | 0.0147%        |
| Sindh Bank Limited                     | 870,530           | 0.0735%        |
| Samba Bank Limited - MT                | 29,456            | 0.0025%        |
|                                        | <b>20,267,864</b> | <b>1.7103%</b> |

#### Insurance Companies

|                                            |                    |                |
|--------------------------------------------|--------------------|----------------|
| National General Insurance Co. Ltd.        | 1,359              | 0.0001%        |
| Business & Industrial Insurance Co. Ltd.   | 9                  | 0.0000%        |
| M/s. New Jubilee Insurance Co. Ltd.        | 2                  | 0.0000%        |
| The South British Insurance Company Ltd.   | 1,864              | 0.0002%        |
| M/s. Beema Pakistan Company Ltd.           | 69                 | 0.0000%        |
| E.F.U. General Insurance Ltd.              | 713                | 0.0001%        |
| Orient Insurance Co. Ltd.                  | 3                  | 0.0000%        |
| Premier Insurance Limited                  | 125,204            | 0.0106%        |
| Jubilee General Insurance Company Limited  | 1,042,654          | 0.0880%        |
| State Life Insurance Corp. of Pakistan     | 18,059,087         | 1.5239%        |
| EFU Life Assurance Ltd.                    | 2,384,197          | 0.2012%        |
| Pakistan Reinsurance Company Limited       | 500,000            | 0.0422%        |
| Excel Insurance Co. Ltd.                   | 52,500             | 0.0044%        |
| The Crescent Star Insurance Co. Ltd.       | 3                  | 0.0000%        |
| Jubilee Life Insurance Company Limited     | 25,130,511         | 2.1206%        |
| East West Insurance Co. Ltd.               | 25,000             | 0.0021%        |
| Century Insurance Company Ltd.             | 32,235             | 0.0027%        |
| Atlas Insurance Limited                    | 140,000            | 0.0118%        |
| Security General Insurance Co. Ltd.        | 59,136,076         | 4.9901%        |
| The Pakistan General Insurance Co. Limited | 106                | 0.0000%        |
| IGI Life Insurance Limited                 | 4,700              | 0.0004%        |
| Alfalah Insurance Company Limited          | 175,000            | 0.0148%        |
| Askari General Insurance Company           | 3,747              | 0.0003%        |
|                                            | <b>106,815,039</b> | <b>9.0135%</b> |

#### Modarabas and Mutual Funds

|                                                     |           |         |
|-----------------------------------------------------|-----------|---------|
| First Hajveri Modaraba                              | 60        | 0.0000% |
| Crescent Modaraba Management Co. Ltd                | 17        | 0.0000% |
| First Elite Capital Modaraba                        | 39        | 0.0000% |
| First Crescent Modaraba                             | 4,030     | 0.0003% |
| Trust Modaraba                                      | 313       | 0.0000% |
| UNICAP Modaraba                                     | 15        | 0.0000% |
| First Interfund Modaraba                            | 2         | 0.0000% |
| Industrial Capital Modaraba                         | 4         | 0.0000% |
| Safeway Fund (Pvt) Ltd                              | 1,665     | 0.0001% |
| Pak Asian Fund Limited                              | 162       | 0.0000% |
| Safeway Mutual Fund Ltd                             | 16        | 0.0000% |
| Golden Arrow Selected Stocks Fund Ltd               | 15        | 0.0000% |
| Prudential Stocks Funds Limited                     | 233       | 0.0000% |
| M/s. Asian Stock Fund Ltd                           | 4         | 0.0000% |
| PICIC Benevolent Fund-2                             | 29        | 0.0000% |
| MCBFSL - Trustee JS Value Fund                      | 66,000    | 0.0056% |
| CDC - Trustee PICIC Investment Fund                 | 182,253   | 0.0154% |
| CDC - Trustee JS Large CAP. Fund                    | 51,350    | 0.0043% |
| CDC - Trustee PICIC Growth Fund                     | 235,004   | 0.0198% |
| CDC - Trustee Atlas Stock Market Fund               | 1,443,415 | 0.1218% |
| CDC - Trustee Alfalah GHP Value Fund                | 118,223   | 0.0100% |
| CDC - Trustee Unit Trust of Pakistan                | 126,600   | 0.0107% |
| CDC - Trustee AKD Index Tracker Fund                | 98,678    | 0.0083% |
| Tri-Star Mutual Fund Limited                        | 754       | 0.0001% |
| Crescent Standard Business Management (Pvt) Limited | 1         | 0.0000% |
| CDC - Trustee NBP Stock Fund                        | 1,240,422 | 0.1047% |

|                                                             |                   |                |
|-------------------------------------------------------------|-------------------|----------------|
| CDC - Trustee NBP Balanced Fund                             | 92,500            | 0.0078%        |
| CDC - Trustee Askari Asset Allocation Fund                  | 12,500            | 0.0011%        |
| CDC - Trustee APF-Equity Sub Fund                           | 75,000            | 0.0063%        |
| CDC - Trustee JS Pension Savings Fund - Equity Account      | 20,500            | 0.0017%        |
| CDC - Trustee HBL - Stock Fund                              | 290,420           | 0.0245%        |
| MC FSL - Trustee JS Growth Fund                             | 455,800           | 0.0385%        |
| CDC - Trustee HBL Multi - Asset Fund                        | 23,900            | 0.0020%        |
| CDC - Trustee Alfalah GHP Stock Fund                        | 442,234           | 0.0373%        |
| CDC - Trustee Alfalah GHP Alpha Fund                        | 203,604           | 0.0172%        |
| CDC - Trustee NIT-Equity Market Opportunity Fund            | 1,158,176         | 0.0977%        |
| CDC - Trustee ABL Stock Fund                                | 1,116,832         | 0.0942%        |
| CDC - Trustee First Habib Stock Fund                        | 17,970            | 0.0015%        |
| CDC - Trustee Lakson Equity Fund                            | 1,190,221         | 0.1004%        |
| CDC - Trustee NBP Sarmaya Izafa Fund                        | 92,800            | 0.0078%        |
| CDC - Trustee NBP Mahana Amdani Fund - MT                   | 144,411           | 0.0122%        |
| CDC - Trustee HBL PF Equity Sub Fund                        | 44,600            | 0.0038%        |
| CDC - Trustee First Capital Mutual Fund                     | 30,000            | 0.0025%        |
| CDC - Trustee UBL Retirement Savings Fund - Equity Sub Fund | 213,019           | 0.0180%        |
| CDC - Trustee National Investment (Unit) Trust              | 870,735           | 0.0735%        |
| CDC - Trustee ABL Pension Fund - Equity Sub Fund            | 28,219            | 0.0024%        |
| CDC - Trustee NBP Income Opportunity Fund - MT              | 12                | 0.0000%        |
| CDC - Trustee NITPF Equity Sub-Fund                         | 26,000            | 0.0022%        |
| CDC - Trustee NBP Savings Fund - MT                         | 15,262            | 0.0013%        |
| CDC - Trustee Faysal MTS Fund - MT                          | 2,805             | 0.0002%        |
| CDC - Trustee Lakson Tactical Fund                          | 136,125           | 0.0115%        |
| CDC - Trustee NBP Financial Sector Fund                     | 233,700           | 0.0197%        |
| CDC - Trustee UBL Financial Sector Fund                     | 868,817           | 0.0733%        |
| CDC - Trustee Allied Finergy Fund                           | 103,939           | 0.0088%        |
| CDC - Trustee NIT Asset Allocation Fund                     | 60,000            | 0.0051%        |
| CDC - Trustee NIT Pakistan Gateway Exchange Traded Fund     | 23,256            | 0.0020%        |
| CDC - Trustee UBL Pakistan Enterprise Exchange Traded Fund  | 29,240            | 0.0025%        |
| CDC - Trustee NBP Pakistan Growth Exchange Traded Fund      | 18,836            | 0.0016%        |
| CDC - Trustee NBP Financial Sector Income Fund - MT         | 18,339            | 0.0015%        |
|                                                             | <b>11,629,076</b> | <b>0.9813%</b> |

#### Share Holders Holding 10%

|                                             |                    |                 |
|---------------------------------------------|--------------------|-----------------|
| Maybank International Trust (Labuan) Berhad | 222,606,147        | 18.7844%        |
|                                             | <b>222,606,147</b> | <b>18.7844%</b> |

#### General Public

|           |             |          |
|-----------|-------------|----------|
| - Local   | 137,247,548 | 11.5815% |
| - Foreign | 4,874,244   | 0.4113%  |

#### Others

|                                                                                                 |                    |                 |
|-------------------------------------------------------------------------------------------------|--------------------|-----------------|
|                                                                                                 | <b>343,562,314</b> | <b>28.9911%</b> |
| - Foreign Companies                                                                             | 131,171,748        | 11.0688%        |
| - Local Companies                                                                               | 45,092,084         | 3.8050%         |
| - D. G. Khan Cement Company Limited                                                             | 102,277,232        | 8.6306%         |
| - Nishat Mills Limited (as disclosed in Associated Companies, Undertakings and Related Parties) | -                  | -               |
| - Bugis Investments (Mauritius) PTE Ltd.                                                        | 65,020,947         | 5.4867%         |
| - Executives (as per the threshold determined by Board of Directors)                            | 303                | 0.0000%         |

|              |                      |                  |
|--------------|----------------------|------------------|
| <b>Total</b> | <b>1,185,060,006</b> | <b>100.0000%</b> |
|--------------|----------------------|------------------|

All the trades in shares carried out by Directors, CEO, CFO, Secretary, Executives, their Spouses and Minor Children during the year 2020 are given below:

| Name                        | Status   | No. of Shares | Purchase/Sale/Transfer |
|-----------------------------|----------|---------------|------------------------|
| Mr. Shahzad Hussain         | Director | 500           | Purchased              |
| Mr. Shariffuddin Bin Khalid | Director | 500           | Purchased              |
| Mr. Salman Khalid Butt      | Director | 48,000        | Purchased              |

## Notice of 73<sup>rd</sup> Annual General Meeting

Notice is hereby given that 73<sup>rd</sup> Annual General Meeting of **MCB Bank Limited** (the “Bank” or “MCB”) will be held on **Saturday, March 27, 2021 at 11:00 AM (PST)** at Grand Ball Room-D, The Nishat Hotel, Emporium Mall, Near Expo Center, Abdul Haq Road, Johar Town, Lahore with Video Link facility to transact the following business:

### Ordinary Business:

1. To confirm/approve the Minutes of Annual General Meeting held on March 19, 2020.
2. To receive, consider and adopt the Annual Audited Separate and Consolidated Financial Statements of the Bank together with the Directors’ Report and Auditors’ Report thereon and the Chairman’s Review Report for the year ended December 31, 2020.
3. To appoint Auditors of the Bank and fix their remuneration. The Members are hereby notified that the Board’s Audit Committee and the Board have recommended the name of M/s A.F. Ferguson & Co., Chartered Accountants, as auditors of the Bank in place of retiring auditors M/s KPMG Taseer Hadi & Co., Chartered Accountants.
4. To approve, as recommended by the Board of Directors, payment of Final Cash Dividend @ 150% i.e., PKR 15.00 per share having face value of PKR 10/- in addition to 50% i.e., PKR 5.00 per share Interim Cash Dividend already declared and paid, thus total 200% i.e., PKR 20.00 per share for the year ended December 31, 2020.
5. To elect twelve (12) Directors of the Bank as fixed by its Board of Directors under Section 159(1) of the Companies Act, 2017 for a period of three (3) years commencing from March 27, 2021. The following are names of retiring directors who are eligible for re-election:
 

|                              |                                              |
|------------------------------|----------------------------------------------|
| 1. Mian Mohammad Mansha.     | 7. Mr. Mohd Suhail Amar Suresh bin Abdullah. |
| 2. Mr. S. M. Muneer.         | 8. Mr. Yahya Saleem.                         |
| 3. Mr. Muhammad Tariq Rafi.  | 9. Mr. Salman Khalid Butt.                   |
| 4. Mian Umer Mansha.         | 10. Mr. Masood Ahmed Puri.                   |
| 5. Mrs. Iqraa Hassan Mansha. | 11. Mr. Shahzad Hussain.                     |
| 6. Mr. Muhammad Ali Zeb.     | 12. Mr. Shariffuddin Bin Khalid.             |

### Special Business:

6. To consider and, if deemed fit, to pass an Ordinary Resolution, with or without amendments, in terms of Section 183(3)(b) of the Companies Act, 2017 to approve the voluntary winding up of M/s Financial & Management Services (Pvt.) Limited, a subsidiary of the Bank.

By Order of the Board,

-Sd-

**FIDA ALI MIRZA**  
Company Secretary

**March 05, 2021**  
**Lahore.**

Statement of Material Facts under Section 134(3) of the Companies Act, 2017 (“Act”) pertaining to the above mentioned Special Business and the Statement under Section 166(3) of the Act are annexed to this Notice of 73<sup>rd</sup> Annual General Meeting circulated to the Members of the Bank.

### Notes:

1. Minutes of the Annual General Meeting held on March 19, 2020 of MCB Bank Limited (the “Bank” or “MCB”) were available for inspection by Members as required under Section 152 of the Companies Act, 2017 (the “Act”).
2. The Shares Transfer Books of the Bank will remain closed from **March 16, 2021 to March 27, 2021** (both days inclusive). Transfers received at the Bank’s Share Registrar and Transfer Agent’s Office at the below mentioned address, at the close of business hours on **March 15, 2021** will be treated as being in time for the purpose of entitlement of Final Cash Dividend and also to attend, speak and vote at the 73<sup>rd</sup> Annual General Meeting (the “Meeting” or “AGM”) of the Bank.

3. All Members are entitled to attend and vote at the Meeting. A member entitled to attend and vote at AGM may appoint another member as a proxy to attend and vote on his/her behalf. No person shall act as a proxy, who is not a member of the Bank. A corporate entity, being a member, may authorize through resolution of its board or other governing body, an individual to act as its representative and the individual so authorized shall be entitled to exercise the same powers on behalf of the corporate entity which he represents.
4. The proxies and in case of corporate entity, the power of attorney or resolution of the board of directors or other governing body (if any) under which it is signed, a notarized/certified copy of the same in order to be effective must be deposited at the Share Registrar and Transfer Agent Office of the Bank not less than 48 hours (no account shall be taken of any part of the day that is not a working day) before the time for holding the Meeting, and must be duly stamped, signed and witnessed.
5. If a Member appoints more than one proxy, and more than one instrument of proxy is deposited by a Member, all such instruments of proxy shall be rendered invalid.
6. Members having physical scrip of shares are requested to immediately notify the change, if any, in their registered and/or e-mail addresses, in writing, to the Share Registrar and Transfer Agent of the Bank, whereas, CDC Account holders are requested to contact their CDC Participant/CDC Account Services.
7. Central Depository Company of Pakistan ("CDC") Accountholders will further have to follow the under mentioned guidelines as laid down by Circular No. 01, dated January 26, 2000, issued by the Securities and Exchange Commission of Pakistan ("SECP"):

**For Attending the Meeting:**

- i. In case of individuals, the account-holder or sub-accountholder and/or the person whose securities are in group account and their registration details are uploaded as per the Regulations, shall authenticate his identity by showing his original Computerized National Identity Card ("CNIC") or original passport at the time of attending the Meeting.
- ii. In case of corporate entity, the Board of Directors' resolution/power of attorney with specimen signature of the nominee shall be produced (unless it has been provided earlier) at the time of the Meeting.

**For Appointing of Proxies:**

- i. In case of individuals, the account-holder or sub-accountholder and/or the person whose securities are in group account and their registration details are uploaded as per the CDC Regulations, shall submit the proxy form as per the above requirement.
  - ii. The proxy form shall be witnessed by the two persons whose names, addresses and CNIC numbers shall be mentioned on the form.
  - iii. Attested copy of CNIC or the passport of the beneficial owners and the proxy shall be furnished with the proxy form.
  - iv. The proxy shall produce his/her original CNIC or passport at the time of the meeting.
  - v. In case of corporate entity, the Board of Directors resolution/power of attorney with specimen signature shall be submitted along with proxy form of the Bank.
8. A Proxy Form, both in English and Urdu language, is being separately sent to the Members, along with Notice of AGM.
  9. Copies of the Notice of AGM, the latest annual audited/quarterly financial statements and the Memorandum & Articles of Association of the Bank have been kept at the Registered Office of the Bank which can be obtained and/or inspected during the business hours on any working day from the date of publication of this Notice of AGM till the conclusion of the Meeting by the Shareholders and other persons entitled to attend and vote at the Meeting. Notice of AGM and the latest annual audited/quarterly financial statements have also been placed on website of the Bank, namely, [www.mcb.com.pk](http://www.mcb.com.pk).



10. The existing term of office of the Board of Directors of the Bank will expire on March 27, 2021. The Board of Directors in its Meeting held on February 10, 2021 has fixed the number of elected directors at twelve (12) to be elected in AGM for the period of next three years commencing from March 27, 2021 in accordance with the provisions of Section 159(1) read with Section 161 of the Act.
11. Any person who seeks to contest the election to the office of a Director, whether he is retiring director or otherwise, shall file the following documents with the Company Secretary at the Registered Office of the Bank located at MCB Building, 15-Main Gulberg, Jail Road, Lahore, not later than fourteen days before the date of AGM:
- i. His/her complete Folio Number/CD Account Number including Participant ID etc.;
  - ii. Notice of his/her intention to offer him/herself for the election of directors in terms of Section 159(3) of the Act together with the consent to act as a director of the Bank in Form 28 prescribed under the Act;
  - iii. A detailed profile along with office address as required under SECP's SRO 1196 (I)/2019, dated October 03, 2019;
  - iv. Declaration under Clause 3 of the Listed Companies (Code of Corporate Governance) Regulations, 2019;
  - v. Declaration that he/she is not ineligible to become a director of MCB Bank in terms of Section 153 of the Act;
  - vi. A director must be holding 500 shares of MCB at the time of filing of his/her consent to act as director in terms of Articles of Association of the Bank; and
  - vii. Subject to the requirements of BPRD Circular No. 04 of 2007, dated April 23, 2007 regarding Fit & Proper Test ("FPT") and the Prudential Regulations (G-1) of the State Bank of Pakistan ("SBP"), the following documents, duly filled in and signed, will also be required:
    - Proforma-FPT ("Annexure-I");
    - Affidavit on Non-Judicial Stamp Paper ("Annexure-II");
    - Answered Questionnaire for assessing FPT;
    - Declaration that he is not ineligible to become a director under any provisions of the Banking Companies Ordinance, 1962 ("BCO"), Prudential Regulations or any directives of the SBP;
    - Declaration of Fidelity and Secrecy under Section 33 of the BCO;
    - Attested copy of valid CNIC/NICOP/Passport, recent Photographs;
    - Copies of all academic & professional degrees / certificates;
    - Copies of employment certificates received from previous employers; and
    - Detailed CV having date-wise employment history, if any.
- b) In terms of the criteria prescribed by the SBP, association of the following person as director is undesirable and against public interest:
- A person who is / has been associated with any illegal activity, especially relating to banking business;
  - A person who is in his individual capacity or a proprietary concern of any partnership firm or any company (of which he has been a proprietor, partner, director or shareholder), has been in default of payment of dues owed to any financial institution, Government duties and / or in default of payment of any taxes; and
  - Further, a person is not permitted to be a director of more than one Bank/DFI.
- c) Independent director(s) will be elected through the process of election of directors in terms of Section 159 of the Act; however, they shall meet the criteria laid down in BPRD Circular No. 15 of 2016, dated December 28, 2016 and the Section 166 of the Act; accordingly, the following additional documents are to be submitted by the candidates intended to act as an independent director:
- Declaration of Independence under BPRD Circular No. 15 of 2016, dated December 28, 2016 and the Section 166 of the Act; and
  - Declaration under Clause 6(3) of the Listed Companies (Code of Corporate Governance) Regulations, 2019 that he/she qualified the criteria of eligibility and independence stipulated under the Companies Act, 2017 and rules and regulations framed thereunder.
12. The Members will be allowed to exercise their voting right through postal ballot, that is voting by post, in case the number of candidates is more than the number of directors to be elected.

### **Coronavirus (“COVID-19”) Contingency Planning for AGM**

As per the requirements of the SECP Circular No. EMD/MISC/82/2012-77, dated February 15, 2021 the Bank is providing video Link facility for participation in the AGM. This facility is in addition to holding physical AGM at designated venue. Keeping in view the COVID-19 related Standard Operating Procedures (“SOPs”) issued by the Provisional and/or the Federal Government, the Members are encouraged to participate in the meeting through Video Link. The Members or their proxies who wish to attend the AGM through Video-link are required to register themselves by providing the following information along with valid copy of the CNIC / Passport (both sides)/attested copy of board resolution/power of attorney as applicable through email at: [cat@mcb.com.pk](mailto:cat@mcb.com.pk), (Tel: +92 42 3604 1621, +92 21 3264 1091) of the Bank by close of business on March 25, 2021.

| <b>Name of Shareholder</b> | <b>Folio/CDC Account Number</b> | <b>Number of Shares Held</b> | <b>Valid CNIC/NTN/ Passport Number</b> | <b>Mobile Number and Email Address</b> |
|----------------------------|---------------------------------|------------------------------|----------------------------------------|----------------------------------------|
|                            |                                 |                              |                                        |                                        |

The Members or their proxies who are registered after necessary verification shall be provided a Video Link facility by the Bank on their email addresses provided to the Bank. The Login facility shall remain open from the start of the AGM till its proceedings are concluded.

The Members can also provide their comments/suggestions for the proposed agenda items of the AGM at email, i.e., [cat@mcb.com.pk](mailto:cat@mcb.com.pk).

### **Agenda Item No. 5**

#### **Statement under Section 166(3) of the Companies Act, 2017 in respect of Independent Director(s)**

Independent Directors will be elected through the process of election of directors in terms of Section 159 of the Companies Act, 2017 (the "Act") and they shall meet the criteria laid down under BPRD Circular No. 15 of 2016, dated December 28, 2016 issued by the SBP as well as comply with the requirements of Section 166(2) of the Act.

Section 166(3) of the Act requires that a statement of material facts is required to be annexed to the notice of the general meeting called for the purpose of election of directors which shall indicate the justification for choosing independent directors. Accordingly, it will be ensured that the independent directors to be elected must meet the criteria of independence laid down under section 166 of the Act and the Companies (Manner and Selection of Independent Directors) Regulations, 2018 and his/her name is included in the data bank of independent directors maintained by the Pakistan Institute of Corporate Governance (“PICG”) duly authorized by the Securities and Exchange Commission of Pakistan. Further, their selection will be made due to their respective competencies, skill, knowledge and experience.

The present Directors of the Company have no interest in the above said business except being eligible for re-election as director of the Company.

### **STATEMENT UNDER SECTION 134(3) OF THE COMPANIES ACT, 2017 IN RESPECT OF SPECIAL BUSINESS**

This statement sets out the material facts under Section 134(3) of the Companies Act, 2017 pertaining to the Special Business to be transacted at AGM of the Bank scheduled to be held on March 27, 2021 along with the information as required under SRO 423(I)/2018, dated April 03, 2018 issued by the SECP and applicable to the Bank:

### **Agenda Item No. 6**

#### **Winding Up of a Subsidiary of MCB Bank Limited:**

M/s Financial & Management Services (Pvt.) Limited (“FMSL” or the “Company”) is a subsidiary company of MCB Bank Limited (“MCB” or the “Bank”). MCB holds 95.90% of total issued paid up share capital of FMSL, transferred from NIB Bank Limited (“Ex-NIB”) by virtue of amalgamation with and into MCB on July 07, 2017. FMSL has no assets and liabilities and is in dormant status with no accounting transaction(s) since March 25, 2009. MCB, being a holding company is bearing regulatory expenses including audit fee since then; therefore, the Board of Directors of the Bank has approved the winding up of the Company. As per the requirements of Section 183(3)(b) of the Companies Act, 2017 (the “Act”), the Bank is seeking approval of the members in forthcoming Annual General Meeting of the Bank scheduled to be held on March 27, 2021.

***“RESOLVED THAT pursuant to the provisions of the Section 183 (3)(b) of the Companies Act, 2017 (‘Act’) and other applicable provisions of the laws, rules & regulations, for the time being in force, the approval of the Members of MCB Bank Limited (the ‘Bank’) be and is hereby accorded to voluntary winding up of M/s Financial & Management Services (Pvt.) Limited (‘FMSL’), a subsidiary of the Bank, subject to compliance with all applicable legal requirements by the subsidiary.”***

***“FURTHER RESOLVED THAT the Company Secretary and/or Chief Financial Officer be and are hereby jointly/severally empowered and authorized to do all acts, matters, deeds and things, take any or all necessary actions including signing and execution of agreement(s) and to complete all the regulatory, legal and other formalities including filing of application(s) to the SECP or any other authority as may be necessary or incidental or expedient for the purpose of implementing the aforesaid resolutions.”***

The Directors of the Bank have no personal interest, directly or indirectly, in the above special business, save to the extent of their respective shareholding in the Bank.

**Attention of Shareholders is drawn towards Circulars/Notifications:**

The following Circulars/Notifications require special attention of Members of the Bank:

**1. Requirement of Valid CNIC and IBAN:**

As per the requirements of the Companies (Distribution of Dividends) Regulations, 2017 issued by the Securities and Exchange Commission of Pakistan (“SECP”) and SRO 275 (I)/2016, dated March 31, 2016 issued by the SECP, the payment of cash dividend shall only be made to the Shareholders who have provided copies of their valid CNIC/ NICOP/ Passport (in the case of Individuals) and NTN (in the case of Corporate Entities) and valid details of designated International Bank Account Number (“IBAN”). Therefore, in order to comply with the above regulatory requirements, the Bank has withheld and shall be withholding the payment of cash dividend to those shareholders who have not yet provided copies of their valid CNIC/NICOP/NTN/Passport and details of valid IBAN.

**2. Requirement of FBR’s Approval or Valid Tax Exemption Certificate for Claim of Exemption U/S 150 of the Income Tax Ordinance, 2001:**

The Honorable Lahore High Court, Lahore, in its decision has advised that the Mutual Funds as approved by the Federal Board of Revenue (“FBR”), would not be required to provide exemption certificate under Section 159 of the Income Tax Ordinance, 2001 (“Ordinance”) to claim tax immunity as per clause (47B) of Part-IV of the Second Schedule to the Ordinance. It is, therefore, requested to provide either approval certificate from FBR or in the absence of the said certificate, valid exemption certificate under Section 159 (1) of the Ordinance issued by the concerned Commissioner of the Income Tax, Inland Revenue, FBR. In case of non-availability of approval / exemption certificate(s), the deduction of advance tax on dividend shall be made as per the relevant provisions of the Ordinance.

**3. Deduction of Withholding Tax on the Amount of Dividend:**

As per the provisions of the Section 150 of the Income Tax Ordinance, 2001, the details of withholding tax on dividend are as follows:

- For Filers of Income Tax Returns: 15%
- For Non-Filers of Income Tax Returns: 30%

In case of joint-shareholders, tax is to be deducted as per ratio of their respective share in the ownership.

Federal Board of Revenue (“FBR”) has provided the Active Tax-Payer List (“ATL”), for identification on the basis of NTN/CNIC number; hence, in case of non-availability of valid NTN/CNIC number with MCB’s Share Registrar and Transfer Agent, it would not be possible to identify the same in ATL and the Bank will be constrained to treat the Shareholder as ‘Non-Filer’ to qualify for tax at higher rate of 30%. Therefore, shareholders who have not yet provided such information are requested to ensure that their valid NTN/CNIC number is available with the Share Registrar and Transfer Agent of MCB. In case of shares held as book-entry securities, the said information would be required to be provided to CDS, through CDS Participants.

**4. Deduction of Withholding Tax on Joint Account Holder(s):**

The Joint Account Holders whose shareholding details as to Principal Shareholder have not yet been determined for deduction of withholding tax on the upcoming dividend of the Bank, are requested to please furnish to the Share Registrar and Transfer Agent of the Bank; the shareholding details of yourself as Principal Shareholder and your Joint Holder(s) in the following manner, enabling MCB to compute withholding tax of each shareholder accordingly:

| CDC Account No./ Folio No. | Name of Principal Shareholder/Joint Holders | Shareholding Proportion | CNIC No. (copy attached) | Signature |
|----------------------------|---------------------------------------------|-------------------------|--------------------------|-----------|
|                            |                                             |                         |                          |           |
|                            |                                             |                         |                          |           |

Kindly note that in case of non-receipt of the information each Account Holder will be assumed to hold equal proportion of shares and the deduction will be made accordingly.

**5. Circulation of Annual Audited Financial Statements and Notice of AGM to Members:**

SECP through its Notification No. SRO 787 (I)/2014, dated September 08, 2014, has allowed companies to circulate Annual Audited Financial Statements along with Notice of Annual General Meeting to its members through email. Further, as per the requirements of the SECP Notification No. SRO 470 (I)/2016, dated May 31, 2016, the Bank is circulating its Annual Accounts to shareholders through electronic medium, i.e., CD/DVD at their registered addresses instead of transmitting the said annual accounts in hard copies. However, in case a shareholder is required hard copy of the Annual Accounts, the same can be obtained, free of cost, within one week of the request. In this regard, a Standard Request Form has been placed on website of the Bank, namely, [www.mcb.com.pk](http://www.mcb.com.pk), for shareholders to communicate the need of hard copies of the Annual Accounts instead of sending the same through CD/DVD. A shareholder may also prefer to receive hard copies for all future Annual Accounts.

**6. Unclaimed Dividends and Shares Certificates:**

The shareholders who have not yet claimed their cash dividends, right and bonus shares which are kept with the Share Registrar of the Bank, namely, M/s THK Associates (Pvt.) Limited, as undelivered/unclaimed dividends and shares certificates or which are in their custody are requested that they should either en-cash their dividend warrants already available with them, or make a claim for cash dividends, right and bonus shares kept by MCB's Share Registrar and Transfer Agent.

**7. Postal Ballot / E-voting:**

Pursuant to the provisions of the Companies (Postal Ballot) Regulations, 2018 (the "Regulations"), for any other agenda item subject to the requirements of Section 143 and 144 of the Act, Members present in person, through video-link or by proxy, and having not less than one-tenth of the total voting power can also demand a poll and exercise their right of vote through postal ballot, that is voting by Ballot Paper or e-voting, in accordance with requirements and procedure contained in the Regulations.

**8. Deposit of Physical Shares into CDC Account:**

The Shareholders having physical shareholding may open CDC sub-account with any of the brokers or Investor Account directly with CDC to place their physical shares into book-entry form, this will facilitate them in many ways including safe custody and sale of shares, any time they want, as the trading of physical shares is not permitted as per existing regulations of the Stock Exchange. Further, Section 72 of the Act states that after the commencement of the Act from a date notified by SECP, a company having share capital, shall have shares in book-entry form only. Every existing company shall be required to replace its physical shares with book-entry form in a manner as may be specified and from the date notified by SECP, within a period not exceeding four years from the commencement of the Act.

**9. Merger of Different Folios into One Folio:**

As per record, some of the shareholders are maintaining more than one folio(s) under the same particulars. Carrying more than one folio may be a hassle for the shareholders to reconcile and receive different benefits in the shape of dividends/ bonus. In order to provide better services and convenience, such shareholders are requested to send

requests to the MCB's Share Registrar and Transfer Agent to merge their folios into one folio. While sending the copy of NTN/CNIC/NICOP number, shareholders are requested to quote their respective Folio/CDC Account Numbers for identification purpose.

**10. Zakat Declaration (CZ-50):**

Zakat will be deducted from the dividends at source at the rate of 2.5 % of the paid-up value of the share, i.e., PKR 10/- each and will be deposited within the prescribed period with the relevant authority. In case of claiming exemption, please submit your Zakat Declarations under Zakat and Ushr Ordinance, 1980 and Rule 4 of Zakat (Deduction and Refund) Rules, 1981, "CZ-50 Form" with the Share Registrar and Transfer Agent of the Bank at the below mentioned address and the respective Folio and CDC Account details.

**11. Placement of Notice of AGM on the Website:**

Notice of 73<sup>rd</sup> AGM of the Bank has been placed on the Website of the Bank, i.e., [www.mcb.com.pk](http://www.mcb.com.pk), in addition to its dispatch to the Shareholders through CD/DVDs, printed copies as well as publication in the newspapers.

While sending the copy of NTN/CNIC/NICOP number, shareholders are requested to quote their respective Folio/CDC Account Numbers for identification purpose.

**M/s THK Associates (Pvt) Ltd.,**

**Share Registrar and Transfer Agent-MCB Bank Limited**

Plot No. 32-C, Jami Commercial Street 2, D.H.A., Phase VII, Karachi-75500. Pakistan.

P.O. Box No. 8533, UAN: +92 (21) 111-000-322,

Fax: +92 (21) 35310191.

**Email:** [sfc@thk.com.pk](mailto:sfc@thk.com.pk)

**Website:** [www.thk.com.pk](http://www.thk.com.pk)

## Glossary of Terms

Important terms and formulae used for calculation in Financial Statements are briefly described here;

### Accrual Basis

Recognizing the effects of transactions and other events when they occur without waiting for receipt or payment of cash or its equivalent.

### Basis point

One hundredth of a per cent i.e. 0.01 per cent. 100 basis points is 1 per cent. Used when quoting movements in interest rates or yields on securities.

### Breakup Value per share

Represents the total worth (equity) of the business per share, calculated as shareholders' equity or Net Assets excluding the impact of revaluation on fixed assets, divided by the total number of share outstanding at year end.

### BSD

Banking Surveillance Department of State Bank of Pakistan

### BPRD

Banking Policy and Regulation Department of State Bank of Pakistan

### CAGR

An abbreviation for Compound Annual Growth Rate.

### Capital Adequacy Ratio (CAR)

The relationship between capital and risk weighted assets as defined in the framework developed by the State Bank of Pakistan.

### Cash Reserve Ratio (CRR)

Cash Reserve Ratio is the amount of funds that the banks have to keep with SBP.

### Cash Equivalents

Short-term highly liquid investments that are readily convertible to known amounts of cash and which are subject to an insignificant risk of changes in value.

### Commitment to Extend Credit

Credit facilities approved but not yet utilized by the client as at the Balance Sheet date.

### Cost to Income Ratio

The proportion of admin expenses to total income, represented as combination of net interest income and non interest income.

### Credit Risk Spread

The credit spread is the yield spread between securities with the same coupon rate and maturity structure but with different associated credit risks, with the yield spread rising as the credit rating worsens. It is the premium over the benchmark or risk-free rate required by the market to take on a lower credit quality.

### Discount rate

Discount is the rate at which SBP provides three-day Repo facility to banks, acting as the lender of last resort.

### Dividend Payout Ratio

Dividends (cash dividend plus bonus shares) paid per share as a fraction of earnings per share (EPS).

### Dividend Yield Ratio

Dividend per share divided by the market value of share.

### Earnings Per Share

Profit after taxation divided by the weighted average number of ordinary shares in issue

### Fixed Deposits

Deposits having fixed maturity dates and a rate of return.

### Forced Sale Value (FSV)

Forced Sale Value means the value which fully reflects the possibility of price fluctuations and can currently be obtained by selling the mortgaged / pledged assets in a forced / distressed sale conditions.

### Government Securities

Government Securities shall include such types of Pak. Rupee obligations of the Federal Government or a Provincial Government or of a Corporation wholly owned or controlled, directly or indirectly, by the Federal Government or a Provincial Government and guaranteed by the Federal Government as the Federal Government may, by notification in the Official Gazette, declare, to the extent determined from time to time, to be Government Securities.

### Impairment allowances

A provision held on the balance sheet as a result of the raising of a charge against profit for the incurred loss inherent in the lending book. An impairment allowance may either be identified or unidentified and individual or collective.

### Foreign Exchange Options (FX Options)

Contracts that give the buyer the right, but not the obligation, to buy or sell one currency against the other, at a predetermined price and on or before a predetermined date. The buyer of a call/ put FX option has the right to buy/sell a currency against another at a specified rate.

### Forward Purchase Contract

Forward purchase contract is one in which the exporter enters into the forward booking contract to protect himself from the exchange rate fluctuation at the time of receiving payment.

### Forward Sale Contract

In a forward sale contract the importer enters into a transaction to buy foreign currency from the Bank at the predetermined rate to protect himself from the exchange fluctuation at the date the payment.

## Glossary of Terms

### Historical Cost Convention

Recording transactions at the actual value received or paid.

### IAS

International Accounting Standards

### IFRS

International Financial Reporting Standards

### IFRIC

International Financial Reporting Interpretation Committee

### Interest Spread

Represents the difference between the average interest rate earned and the average interest rate paid on funds.

### Loan losses and provisions

Amount set aside against identified and possible losses on loans, advances and other credit facilities as a result of their becoming party or wholly uncollectible.

### Liquid Assets

The assets which are readily convertible into cash without recourse to a court of law and mean encashment / realizable value of government securities, bank deposits, certificates of deposit, shares of listed companies which are actively traded on the stock exchange, NIT Units, certificates of mutual funds, Certificates of Investment (COIs) issued by DFIs / NBFCs rated at least 'A' by a credit rating agency on the approved panel of State Bank of Pakistan, listed TFCs rated at least 'A' by a credit rating agency on the approved panel of State Bank of Pakistan and certificates of asset management companies for which there is a book maker quoting daily offer and bid rates and there is active secondary market trading. These assets with appropriate margins should be in possession of the banks / DFIs with perfected lien.

### Market Capitalization

Number of ordinary shares in issue multiplied by the market value of share as at any cut-off date.

### Materiality

The relative significance of a transaction or an event the omission or misstatement of which could influence the economic decisions of users of financial statements.

### Net Interest Income (NII)

Net interest income is the difference between the interest earned on assets and interest expensed on liabilities.

### Non-Performing Loan

A non-performing loan is a loan that is in default or close to being in default. Loans become non-performing in accordance with provision of prudential regulations issued by SBP.

### NPLs to Gross Advances/Loans

Represents the infected portfolio of the bank and is

calculated by dividing the total non-performing loans by gross advances.

### Non Performing Loan-Substandard Category

Where markup/interest or principal is overdue by 90 days or more from the due date.

### Non Performing Loan-Doubtful Category

Where markup/interest or principal is overdue by 180 days or more from the due date.

### Non Performing Loan-Loss Category

Where mark-up/interest or principal is overdue by one year or more from the due date and Trade Bill (Import/Export or Inland Bills) are not paid/adjusted within 180 days of the due date.

### Off Balance Sheet Transactions

Transactions that are not recognized as assets or liabilities in the statement of financial position but which give rise to contingencies and commitments.

### Price Earnings Ratio (P/E Ratio)

Market price of a share divided by earnings per share. Repo / Reverse Repo A repurchase agreement, or repo, is a short term funding agreements which allow a borrower to sell a financial asset, such as ABS or government bonds as collateral for cash. As part of the agreement the borrower agrees to repurchase the security at some later date, usually less than 30 days, repaying the proceeds of the loan. For the party on the other end of the transaction (buying the security and agreeing to sell in the future) it is a reverse repurchase agreement or reverse repo.

### Return on Equity (ROE)

Represents the ratio of the current year's profit available for distribution to the weighted average shareholders equity over the period under review, calculated by dividing the net profit (profit after tax) to the average equity (before surplus) for the period.

### Return on Assets (ROA)

Indicator of profitability of the business relative to the value of its assets, calculated by dividing the net profit (profit after tax) to the average total assets for the period.

### Statutory Reserve Funds

A capital reserve created as per the provisions of the section 21 of Banking Companies Ordinance, 1962.

### Small Enterprise

A Small Enterprise (SE) is a business entity which meets both the following parameters:

|                                |                       |
|--------------------------------|-----------------------|
| Number of Employees            | Annual Sales Turnover |
| *Up to 50                      | Up to Rs. 150 million |
| *including contract employees. |                       |

# Glossary of Terms

## **Basel III**

Basel III (or the Third Basel Accord) is a global, voluntary regulatory standard on bank capital adequacy, stress testing and market liquidity risk.

## **Strategic Investment**

Strategic Investment is an investment which a bank / DFI makes with the intention to hold it for a period of minimum 5 years.

The following must be noted further in respect of strategic investment:

- The bank should mark strategic investment as such at the time of investment
- If there are a series of purchases of stocks of a company, the minimum retention period of 5 years shall be counted from the date of the last purchase.

## **SRO**

Statutory Regulatory Order

## **KIBOR – (Karachi Interbank Offered Rate)**

KIBOR is the interbank lending rate between banks in Pakistan and is used as a benchmark for lending.

## **LIBOR (London Interbank Offered Rate)**

An interest rate at which banks can borrow funds, in marketable size, from other banks in the London interbank market. The LIBOR is fixed on a daily basis by the British Bankers' Association.

## **VaR**

Value at Risk is an estimate of the potential loss which might arise from market movements under normal market conditions, if the current positions were to be held unchanged for one business day, measured to a confidence level of 97.5 per cent.

## **Weighted Average Cost of Deposits**

Percentage of the total interest expense on average deposit of the bank for the period.



# Form of Proxy

## 73<sup>rd</sup> Annual General Meeting

I/We \_\_\_\_\_ of \_\_\_\_\_ being a member of **MCB Bank Limited**, holder of \_\_\_\_\_ Ordinary Share(s) as per Folio No. and/or CDC Account No. \_\_\_\_\_ do hereby appoint Mr./Mrs./Miss \_\_\_\_\_ having Folio No. /CDC Account No. \_\_\_\_\_ or failing him/her, Mr./Mrs./Miss \_\_\_\_\_ having Folio No. /CDC Account No. \_\_\_\_\_ as my/our proxy to attend, speak and vote for me/us on my/our behalf at the **73<sup>rd</sup> Annual General Meeting ("AGM")** of the Bank to be held on **Saturday, the 27<sup>th</sup> day of March, 2021 at 11:00 AM (PST)** at Grand Ball Room-D, The Nishat Hotel, Emporium Mall, Near Expo Center, Abdul Haq Road, Johar Town, Lahore, and at any adjournment thereof in the same manner as I/we/myself/ ourselves would vote if personally present at such meeting.

As witness my / our hand/Seal this \_\_\_\_\_ day of \_\_\_\_\_ 2021.

Signed by \_\_\_\_\_

| Folio No. | CDC Account No.  |             |
|-----------|------------------|-------------|
|           | Participant I.D. | Account No. |
|           |                  |             |

Signature on  
Five-Rupees  
Revenue Stamp

The signature should agree with the specimen registered with the Bank.

### Witnesses:

|           |         |           |         |
|-----------|---------|-----------|---------|
| 1. Name   | : _____ | 2. Name   | : _____ |
| Address   | : _____ | Address   | : _____ |
| CNIC No.  | : _____ | CNIC No.  | : _____ |
| Signature | : _____ | Signature | : _____ |

### Note:

- A member eligible to attend, speak and vote at the AGM may appoint another member as his/her proxy who shall have such rights as narrated in Section 137 of the Companies Act, 2017.
- This Proxy Form, duly completed and signed, must be deposited in the office of M/s THK Associates (Pvt) Limited, the Share Registrar and Transfer Agent of the Bank, situated at Plot No. 32-C, Jami Commercial Street 2, D.H.A., Phase VII, Karachi-75400, not less than 48 hours before the time of holding the meeting.
- If a member appoints more than one proxy and more than one instrument of proxies are deposited by a member with the Share Registrar and Transfer Agent of the Bank, all such instruments of proxy shall be rendered invalid.
- For CDC Account Holders / Corporate Entities**
  - Attested copies of CNIC/ NICOP or the passport of the beneficial owners and the proxy shall be provided with the Proxy Form.
  - The proxy shall produce his/her original CNIC/ NICOP or passport at the time of the meeting.
  - In case of a corporate entity, the Board of Directors' resolution / power of attorney with specimen signature shall be submitted along with Proxy Form to the Share Registrar and Transfer Agent of the Bank.

## پراکسی فارم

73 واں سالانہ عام اجلاس

میں / ہم \_\_\_\_\_  
 ساکن \_\_\_\_\_ بحیثیت ممبر ایم سی بی بینک لمیٹڈ اور \_\_\_\_\_ عام حصص کا مالک \_\_\_\_\_ فوئیو ای سی ڈی سی اکاؤنٹ نمبر کے تحت  
 مستی / مسماۃ \_\_\_\_\_ کو جس کا فوئیو ای سی ڈی سی اکاؤنٹ نمبر \_\_\_\_\_ ہے یا اس کی عدم دستیابی کی صورت میں  
 مستی / مسماۃ \_\_\_\_\_ جس کا فوئیو ای سی ڈی سی اکاؤنٹ نمبر \_\_\_\_\_ ہے بطور پراکسی مقرر کرتا ہوں / کرتی ہوں / کرتے ہیں  
 تاکہ وہ میری / ہماری غیر موجودگی میں میری / ہماری طرف سے بینک کے 73 ویں سالانہ عام اجلاس جو بروز ہفتہ، مورخہ 27 مارچ 2021، بوقت 11:00 بجے صبح، بمقام گریڈ ہال روم۔  
 ڈی، دی نشاط ہوٹل، ایمپوریم مال، نزد انیسویسینٹر، عبدالحق روڈ، جوہر ٹاؤن، لاہور منعقد ہو رہا ہے اس میں اور اس کے کسی ملتی شدہ اجلاس میں، اس طرح سے شرکت کرے، بات کرے، اور ووٹ  
 ڈالے کہ جس طرح میں / ہم خود اس اجلاس میں موجود ہوں۔

میرے / ہمارے دستخط، بتاریخ \_\_\_\_\_ 2021ء

دستخطی \_\_\_\_\_

پانچ روپیہ کے ریونیوسٹامپ پر دستخط  
 دستخط بینک میں رجسٹرڈ نمونے سے  
 مطابقت رکھتے ہوں

| سی ڈی سی اکاؤنٹ |              | فوئیو نمبر |
|-----------------|--------------|------------|
| اکاؤنٹ نمبر     | پارٹیسپنٹ ID |            |
|                 |              |            |

گواہان:

(1) نام: \_\_\_\_\_  
 پتہ: \_\_\_\_\_  
 شناختی کارڈ نمبر: \_\_\_\_\_  
 دستخط: \_\_\_\_\_

(2) نام: \_\_\_\_\_  
 پتہ: \_\_\_\_\_  
 شناختی کارڈ نمبر: \_\_\_\_\_  
 دستخط: \_\_\_\_\_

نوٹ:

- 1- اے جی ایم میں شرکت کرنے، بولنے اور ووٹ دینے کا اہل رکن کسی دوسرے رکن کو اپنا اپنی پراکسی مقرر کر سکتا ہے جس کو وہ تمام حقوق حاصل ہونگے جیسا کہ کنویژن ایکٹ 2017ء کے سیکشن 137 میں بیان کئے گئے ہیں۔
- 2- یہ مکمل پر کردہ اور دستخط شدہ پراکسی فارم بینک کے شیئرز رجسٹرار اور ٹرانسفر ایجنٹ میسرز ڈی ایچ کے ایسوی ایس (پرائیویٹ) لمیٹڈ، بمقام پلاٹ نمبر C-32، جامی کمرشل اسٹریٹ 2، ڈی ایچ اے، فیز VII، کراچی۔ 75400 کے دفتر میں اجلاس کے انعقاد سے 48 گھنٹے پہلے جمع کروانا ہوگا۔
- 3- اگر ایک رکن ایک سے زیادہ پراکسی مقرر کرتا ہے اور بینک کے شیئرز رجسٹرار اور ٹرانسفر ایجنٹ کے پاس رکن کی طرف سے پراکسی فارم کی ایک سے زائد دستاویزات جمع کرائی جائیں تو پراکسی کی ایسی تمام دستاویزات کا اہم تصور ہوں گی۔
- 4- سی ڈی سی اکاؤنٹ رکھنے والوں / کارپوریٹ اداروں کے لیے:
  - مستفید مالکان اور پراکسی کے سی این آئی سی / این آئی سی او پی یا پاسپورٹ کی تصدیق شدہ کاپیاں پراکسی فارم کے ساتھ مہیا کی جائیں گی۔
  - اجلاس کے موقع پر پراکسی اپنا اصل سی این آئی سی / این آئی سی او پی یا پاسپورٹ مہیا کرے گا۔
  - کارپوریٹ ادارہ ہونے کی صورت میں، بورڈ آف ڈائریکٹرز کی قرارداد / مختار نامہ نمونے کے مطابق دستخط کے ساتھ بینک کے رجسٹرار اور ٹرانسفر ایجنٹ کے پاس پراکسی فارم کے ساتھ جمع کروانا ہوگا۔

# Investors' Awareness

www.jamapunji.pk

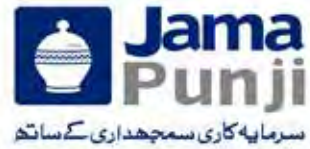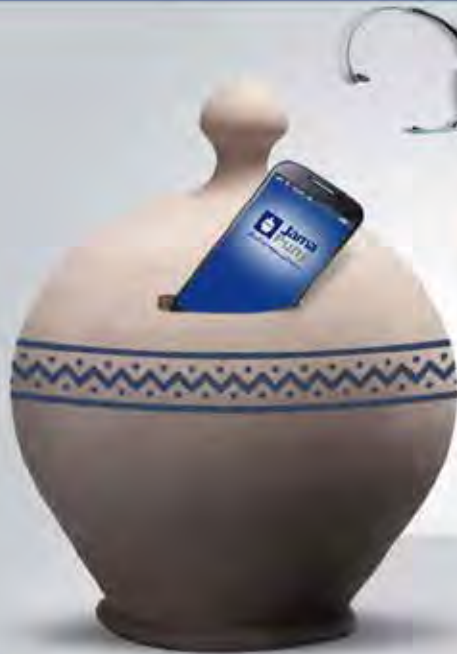

## Be aware, Be alert, Be safe

Learn about investing at  
[www.jamapunji.pk](http://www.jamapunji.pk)

### Key features:

- Licensed Entities Verification
- Scam meter\*
- Jamapunji games\*
- Tax credit calculator\*
- Company Verification
- Insurance & Investment Checklist
- FAQs Answered
- Online Quizzes
- Stock trading simulator (based on live feed from PSX)
- Knowledge center
- Risk profiler\*
- Financial calculator
- Subscription to Alerts (event notifications, corporate and regulatory actions)
- Jamapunji application for mobile device

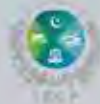

Jama Punji is an Investor Education Initiative of Securities and Exchange Commission of Pakistan

[jamapunji.pk](http://jamapunji.pk)

[@jamapunji\\_pk](https://twitter.com/jamapunji_pk)

\*Mobile apps are also available for download for android and ios devices

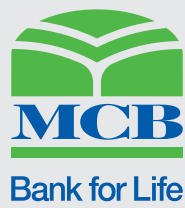

Registered Office: MCB House, 15 Main Gulberg, Jail Road, Lahore, Pakistan  
U: +92 42 111 000 622 T: +92 42 36041998-9 E: info@mcb.com.pk www.mcb.com.pk
